# Supplementary material for: Cancer immune control needs senescence induction by interferon-dependent cell cycle regulator pathways in tumours
Source: PubMed Central journal article supplement (PMC7067802; doi:10.1038/s41467-020-14987-6), 2020-03-12
Supplement: 41467_2020_14987_MOESM4_ESM.pdf [file 41467_2020_14987_MOESM4_ESM.pdf]

Supplementary Data 1 Custom gene panel ssSCv2

| Chr  | start    | end      | Gene           |
|------|----------|----------|----------------|
| chr1 | 8073244  | 8074481  | ERRFI1         |
| chr1 | 8075342  | 8075469  | ERRFI1         |
| chr1 | 8075529  | 8075704  | ERRFI1         |
| chr1 | 11166636 | 11166864 | MTOR           |
| chr1 | 11166971 | 11167206 | MTOR           |
| chr1 | 11167516 | 11167582 | MTOR           |
| chr1 | 11168212 | 11168368 | MTOR           |
| chr1 | 11169321 | 11169452 | MTOR           |
| chr1 | 11169680 | 11169811 | MTOR           |
| chr1 | 11171159 | 11171213 | MTOR           |
| chr1 | 11172883 | 11172999 | MTOR           |
| chr1 | 11174349 | 11174535 | MTOR           |
| chr1 | 11174844 | 11174969 | MTOR           |
| chr1 | 11175427 | 11175550 | MTOR           |
| chr1 | 11177035 | 11177168 | MTOR           |
| chr1 | 11181277 | 11181450 | MTOR           |
| chr1 | 11182010 | 11182208 | MTOR           |
| chr1 | 11184529 | 11184715 | MTOR           |
| chr1 | 11186653 | 11186878 | MTOR           |
| chr1 | 11187041 | 11187226 | MTOR           |
| chr1 | 11187655 | 11187888 | MTOR           |
| chr1 | 11188035 | 11188208 | MTOR           |
| chr1 | 11188485 | 11188634 | MTOR           |
| chr1 | 11188886 | 11189033 | MTOR           |
| chr1 | 11189769 | 11189920 | MTOR           |
| chr1 | 11190560 | 11190859 | MTOR           |
| chr1 | 11193111 | 11193279 | MTOR           |
| chr1 | 11194382 | 11194548 | MTOR           |
| chr1 | 11199335 | 11199517 | MTOR           |
| chr1 | 11199564 | 11199740 | MTOR           |
| chr1 | 11204679 | 11204837 | MTOR, MTOR-AS1 |
| chr1 | 11204999 | 11205127 | MTOR, MTOR-AS1 |
| chr1 | 11206707 | 11206873 | MTOR, MTOR-AS1 |
| chr1 | 11210157 | 11210308 | MTOR           |
| chr1 | 11217183 | 11217373 | MTOR           |
| chr1 | 11227473 | 11227599 | MTOR           |
| chr1 | 11259289 | 11259485 | MTOR           |
| chr1 | 11259572 | 11259785 | MTOR           |
| chr1 | 11264592 | 11264785 | MTOR           |
| chr1 | 11269343 | 11269540 | MTOR           |
| chr1 | 11270845 | 11270988 | MTOR           |
| chr1 | 11272343 | 11272556 | MTOR           |
| chr1 | 11272827 | 11272990 | MTOR           |
| chr1 | 11273430 | 11273648 | MTOR           |
| chr1 | 11276179 | 11276316 | MTOR           |
| chr1 | 11288699 | 11289000 | MTOR           |
| chr1 | 11290956 | 11291136 | MTOR           |
| chr1 | 11291331 | 11291516 | MTOR           |
| chr1 | 11292467 | 11292610 | MTOR           |
| chr1 | 11293429 | 11293569 | MTOR           |
| chr1 | 11294174 | 11294347 | MTOR           |
| chr1 | 11297874 | 11298130 | MTOR           |
| chr1 | 11298433 | 11298699 | MTOR           |
| chr1 | 11300334 | 11300629 | MTOR           |
| chr1 | 11301584 | 11301763 | MTOR           |
| chr1 | 11303145 | 11303382 | MTOR           |
| chr1 | 11307656 | 11307815 | MTOR           |
| chr1 | 11307850 | 11308176 | MTOR           |
| chr1 | 11313870 | 11314055 | MTOR           |
| chr1 | 11316023 | 11316274 | MTOR           |
| chr1 | 11316964 | 11317247 | MTOR           |
| chr1 | 11318516 | 11318675 | MTOR           |
| chr1 | 11319279 | 11319491 | MTOR           |
| chr1 | 11850711 | 11850980 | MTHFR          |
| chr1 | 11851238 | 11851408 | MTHFR          |
| chr1 | 11852309 | 11852461 | MTHFR          |
| chr1 | 11853938 | 11854171 | MTHFR          |
| chr1 | 11854389 | 11854620 | MTHFR          |
| chr1 | 11854760 | 11854945 | MTHFR          |
| chr1 | 11855129 | 11855430 | MTHFR          |
| chr1 | 11856237 | 11856481 | MTHFR          |
| chr1 | 11860243 | 11860404 | MTHFR          |
| chr1 | 11861192 | 11861481 | MTHFR          |
| chr1 | 11862912 | 11863211 | MTHFR          |
| chr1 | 11863436 | 11863596 | MTHFR          |
| chr1 | 27022869 | 27024056 | ARID1A         |
| chr1 | 27056116 | 27056379 | ARID1A         |
| chr1 | 27057617 | 27058120 | ARID1A         |
| chr1 | 27059141 | 27059308 | ARID1A         |
| chr1 | 27087321 | 27087612 | ARID1A         |
| chr1 | 27087849 | 27087989 | ARID1A         |
| chr1 | 27088617 | 27088835 | ARID1A         |
| chr1 | 27089438 | 27089801 | ARID1A         |
| chr1 | 27092686 | 27092882 | ARID1A         |
| chr1 | 27092922 | 27093082 | ARID1A         |
| chr1 | 27094255 | 27094515 | ARID1A         |
| chr1 | 27097584 | 27097842 | ARID1A         |
| chr1 | 27098965 | 27099148 | ARID1A         |
| chr1 | 27099277 | 27099503 | ARID1A         |
| chr1 | 27099811 | 27100012 | ARID1A         |

|      |          |          |             |
|------|----------|----------|-------------|
| chr1 | 27100045 | 27100233 | ARID1A      |
| chr1 | 27100267 | 27100414 | ARID1A      |
| chr1 | 27100794 | 27101736 | ARID1A      |
| chr1 | 27102042 | 27102223 | ARID1A      |
| chr1 | 27105488 | 27107272 | ARID1A      |
| chr1 | 36931671 | 36931826 | CSF3R       |
| chr1 | 36931932 | 36932534 | CSF3R       |
| chr1 | 36932805 | 36932937 | CSF3R       |
| chr1 | 36933133 | 36933277 | CSF3R       |
| chr1 | 36933397 | 36933588 | CSF3R       |
| chr1 | 36933650 | 36933847 | CSF3R       |
| chr1 | 36934731 | 36934883 | CSF3R       |
| chr1 | 36935227 | 36935466 | CSF3R       |
| chr1 | 36937008 | 36937272 | CSF3R       |
| chr1 | 36937641 | 36937765 | CSF3R       |
| chr1 | 36937813 | 36938017 | CSF3R       |
| chr1 | 36938092 | 36938312 | CSF3R       |
| chr1 | 36939010 | 36939248 | CSF3R       |
| chr1 | 36939339 | 36939513 | CSF3R       |
| chr1 | 36940952 | 36941299 | CSF3R       |
| chr1 | 36945008 | 36945122 | CSF3R       |
| chr1 | 40363018 | 40363667 | MYCL        |
| chr1 | 40366460 | 40367140 | MYCL        |
| chr1 | 40367454 | 40367585 | MYCL        |
| chr1 | 43803494 | 43803623 | MPL         |
| chr1 | 43803744 | 43803927 | MPL         |
| chr1 | 43804187 | 43804416 | MPL         |
| chr1 | 43804916 | 43805265 | MPL         |
| chr1 | 43805609 | 43805822 | MPL         |
| chr1 | 43806032 | 43806209 | MPL         |
| chr1 | 43812090 | 43812325 | MPL         |
| chr1 | 43812437 | 43812630 | MPL         |
| chr1 | 43814488 | 43814698 | MPL         |
| chr1 | 43814908 | 43815140 | MPL         |
| chr1 | 43817861 | 43817999 | MPL         |
| chr1 | 43818163 | 43818468 | MPL         |
| chr1 | 45286335 | 45286401 | PTCH2       |
| chr1 | 45288061 | 45288366 | PTCH2       |
| chr1 | 45288715 | 45288865 | PTCH2       |
| chr1 | 45288889 | 45289082 | PTCH2       |
| chr1 | 45291896 | 45292084 | PTCH2       |
| chr1 | 45292134 | 45292465 | PTCH2       |
| chr1 | 45292548 | 45292779 | PTCH2       |
| chr1 | 45292813 | 45293006 | PTCH2       |
| chr1 | 45293048 | 45293411 | PTCH2       |
| chr1 | 45293489 | 45293888 | PTCH2       |
| chr1 | 45293942 | 45294111 | PTCH2       |
| chr1 | 45294152 | 45294328 | PTCH2       |
| chr1 | 45294628 | 45294771 | PTCH2       |
| chr1 | 45294803 | 45295009 | PTCH2       |
| chr1 | 45295048 | 45295230 | PTCH2       |
| chr1 | 45295260 | 45295458 | PTCH2       |
| chr1 | 45295555 | 45295727 | PTCH2       |
| chr1 | 45296494 | 45296740 | PTCH2       |
| chr1 | 45297352 | 45297494 | PTCH2       |
| chr1 | 45297621 | 45297741 | PTCH2       |
| chr1 | 45297798 | 45298038 | PTCH2       |
| chr1 | 45307493 | 45307736 | PTCH2       |
| chr1 | 45308507 | 45308629 | PTCH2       |
| chr1 | 45794952 | 45795134 | MUTYH       |
| chr1 | 45796162 | 45796254 | MUTYH       |
| chr1 | 45796828 | 45797031 | MUTYH       |
| chr1 | 45797066 | 45797253 | MUTYH       |
| chr1 | 45797307 | 45797546 | MUTYH       |
| chr1 | 45797669 | 45797783 | MUTYH       |
| chr1 | 45797812 | 45798007 | MUTYH       |
| chr1 | 45798037 | 45798185 | MUTYH       |
| chr1 | 45798220 | 45798384 | MUTYH       |
| chr1 | 45798409 | 45798531 | MUTYH       |
| chr1 | 45798564 | 45798656 | MUTYH       |
| chr1 | 45798743 | 45798867 | MUTYH       |
| chr1 | 45798931 | 45799021 | MUTYH       |
| chr1 | 45799059 | 45799300 | MUTYH       |
| chr1 | 45800037 | 45800208 | MUTYH       |
| chr1 | 45805865 | 45805951 | MUTYH, TOE1 |
| chr1 | 51436015 | 51436194 | CDKN2C      |
| chr1 | 51439539 | 51439967 | CDKN2C      |
| chr1 | 59247721 | 59248767 | JUN         |
| chr1 | 60359297 | 60359526 | CYP2J2      |
| chr1 | 60366611 | 60366800 | CYP2J2      |
| chr1 | 60370517 | 60370755 | CYP2J2      |
| chr1 | 60373432 | 60373624 | CYP2J2      |
| chr1 | 60375430 | 60375657 | CYP2J2      |
| chr1 | 60377254 | 60377465 | CYP2J2      |
| chr1 | 60377808 | 60378008 | CYP2J2      |
| chr1 | 60381584 | 60381797 | CYP2J2      |
| chr1 | 60392183 | 60392443 | CYP2J2      |
| chr1 | 65300219 | 65300365 | JAK1        |
| chr1 | 65301053 | 65301214 | JAK1        |
| chr1 | 65301755 | 65301923 | JAK1        |
| chr1 | 65303589 | 65303812 | JAK1        |
| chr1 | 65304122 | 65304297 | JAK1        |
| chr1 | 65305260 | 65305503 | JAK1        |
| chr1 | 65306902 | 65307047 | JAK1        |
| chr1 | 65307108 | 65307309 | JAK1        |
| chr1 | 65309721 | 65309923 | JAK1        |

|      |           |           |                |
|------|-----------|-----------|----------------|
| chr1 | 65310411  | 65310597  | JAK1           |
| chr1 | 65311170  | 65311348  | JAK1           |
| chr1 | 65312306  | 65312444  | JAK1           |
| chr1 | 65313189  | 65313383  | JAK1           |
| chr1 | 65316461  | 65316618  | JAK1           |
| chr1 | 65321166  | 65321406  | JAK1           |
| chr1 | 65323313  | 65323487  | JAK1           |
| chr1 | 65325762  | 65325970  | JAK1           |
| chr1 | 65330444  | 65330680  | JAK1           |
| chr1 | 65332523  | 65332916  | JAK1           |
| chr1 | 65334968  | 65335182  | JAK1           |
| chr1 | 65339027  | 65339231  | JAK1           |
| chr1 | 65344682  | 65344856  | JAK1           |
| chr1 | 65348934  | 65349183  | JAK1           |
| chr1 | 65351916  | 65351972  | JAK1           |
| chr1 | 78413173  | 78413262  |                |
| chr1 | 78414425  | 78414484  | FUBP1          |
| chr1 | 78414532  | 78414624  | FUBP1          |
| chr1 | 78414814  | 78415010  | FUBP1          |
| chr1 | 78420914  | 78421042  | FUBP1          |
| chr1 | 78422231  | 78422410  | FUBP1          |
| chr1 | 78425843  | 78425973  | FUBP1          |
| chr1 | 78426003  | 78426205  | FUBP1          |
| chr1 | 78428429  | 78428640  | FUBP1          |
| chr1 | 78429233  | 78429425  | FUBP1          |
| chr1 | 78429721  | 78429872  | FUBP1          |
| chr1 | 78429913  | 78430066  | FUBP1          |
| chr1 | 78430305  | 78430457  | FUBP1          |
| chr1 | 78430529  | 78430678  | FUBP1          |
| chr1 | 78430727  | 78430940  | FUBP1          |
| chr1 | 78432352  | 78432460  | FUBP1          |
| chr1 | 78432542  | 78432664  | FUBP1          |
| chr1 | 78432707  | 78432810  | FUBP1          |
| chr1 | 78433285  | 78433375  | FUBP1          |
| chr1 | 78433823  | 78433912  | FUBP1          |
| chr1 | 78434680  | 78434793  | FUBP1          |
| chr1 | 78435583  | 78435724  | FUBP1          |
| chr1 | 78444543  | 78444713  | FUBP1          |
| chr1 | 97544506  | 97544727  | DPYD           |
| chr1 | 97547860  | 97548051  | DPYD           |
| chr1 | 97564019  | 97564213  | DPYD, DPYD-AS1 |
| chr1 | 97658599  | 97658829  | DPYD, DPYD-AS1 |
| chr1 | 97700382  | 97700575  | DPYD, DPYD-AS1 |
| chr1 | 97770789  | 97770959  | DPYD, DPYD-AS1 |
| chr1 | 97771707  | 97771878  | DPYD, DPYD-AS1 |
| chr1 | 97839091  | 97839225  | DPYD           |
| chr1 | 97847923  | 97848042  | DPYD           |
| chr1 | 97915589  | 97915804  | DPYD           |
| chr1 | 97981256  | 97981522  | DPYD           |
| chr1 | 98015090  | 98015325  | DPYD           |
| chr1 | 98039290  | 98039551  | DPYD           |
| chr1 | 98058748  | 98058968  | DPYD           |
| chr1 | 98060589  | 98060747  | DPYD           |
| chr1 | 98144625  | 98144763  | DPYD           |
| chr1 | 98157247  | 98157379  | DPYD           |
| chr1 | 98164881  | 98165128  | DPYD           |
| chr1 | 98165734  | 98165883  | DPYD           |
| chr1 | 98186418  | 98186507  | DPYD           |
| chr1 | 98187040  | 98187252  | DPYD           |
| chr1 | 98205922  | 98206060  | DPYD           |
| chr1 | 98293644  | 98293777  | DPYD           |
| chr1 | 98348794  | 98348955  | DPYD           |
| chr1 | 98386414  | 98386503  | DPYD           |
| chr1 | 115251130 | 115251300 | NRAS           |
| chr1 | 115252164 | 115252374 | NRAS           |
| chr1 | 115256395 | 115256624 | NRAS           |
| chr1 | 115258645 | 115258806 | NRAS           |
| chr1 | 118165465 | 118166691 | FAM46C         |
| chr1 | 120457903 | 120459342 | NOTCH2         |
| chr1 | 120460262 | 120460410 | NOTCH2         |
| chr1 | 120461003 | 120461201 | NOTCH2         |
| chr1 | 120461909 | 120462261 | NOTCH2         |
| chr1 | 120462826 | 120463045 | NOTCH2         |
| chr1 | 120464310 | 120464457 | NOTCH2         |
| chr1 | 120464833 | 120465094 | NOTCH2         |
| chr1 | 120465233 | 120465426 | NOTCH2         |
| chr1 | 120466234 | 120466632 | NOTCH2         |
| chr1 | 120467902 | 120468458 | NOTCH2         |
| chr1 | 120469096 | 120469259 | NOTCH2         |
| chr1 | 120471573 | 120471860 | NOTCH2         |
| chr1 | 120478016 | 120478252 | NOTCH2         |
| chr1 | 120479879 | 120480114 | NOTCH2         |
| chr1 | 120480454 | 120480658 | NOTCH2         |
| chr1 | 120483152 | 120483404 | NOTCH2         |
| chr1 | 120484123 | 120484402 | NOTCH2         |
| chr1 | 120491011 | 120491214 | NOTCH2         |
| chr1 | 120491604 | 120491774 | NOTCH2         |
| chr1 | 120493091 | 120493485 | NOTCH2         |
| chr1 | 120496140 | 120496336 | NOTCH2         |
| chr1 | 120497637 | 120497880 | NOTCH2         |
| chr1 | 120501989 | 120502150 | NOTCH2         |
| chr1 | 120506171 | 120506455 | NOTCH2         |
| chr1 | 120508050 | 120508214 | NOTCH2         |
| chr1 | 120508973 | 120509137 | NOTCH2         |
| chr1 | 120510030 | 120510269 | NOTCH2         |
| chr1 | 120510674 | 120510880 | NOTCH2         |

|      |           |           |               |
|------|-----------|-----------|---------------|
| chr1 | 120512108 | 120512392 | NOTCH2        |
| chr1 | 120529557 | 120529730 | NOTCH2        |
| chr1 | 120534059 | 120534130 | NOTCH2        |
| chr1 | 120534206 | 120534281 | NOTCH2        |
| chr1 | 120539263 | 120539394 | NOTCH2        |
| chr1 | 120539398 | 120539451 | NOTCH2        |
| chr1 | 120539594 | 120539980 | NOTCH2        |
| chr1 | 120547926 | 120548236 | NOTCH2        |
| chr1 | 120572503 | 120572635 | NOTCH2        |
| chr1 | 120611371 | 120612100 | NOTCH2        |
| chr1 | 150549814 | 150549992 | MCL1          |
| chr1 | 150550694 | 150550992 | MCL1          |
| chr1 | 150551293 | 150552031 | MCL1          |
| chr1 | 155158585 | 155158710 | MUC1          |
| chr1 | 155159282 | 155159392 | MUC1          |
| chr1 | 155159675 | 155159875 | MUC1          |
| chr1 | 155159905 | 155160077 | MUC1          |
| chr1 | 155160172 | 155160359 | MUC1          |
| chr1 | 155160458 | 155160564 | MUC1          |
| chr1 | 155160613 | 155161453 | MUC1          |
| chr1 | 155161476 | 155161555 | MUC1          |
| chr1 | 155161673 | 155162126 | MUC1          |
| chr1 | 155162551 | 155162659 | MUC1          |
| chr1 | 156785596 | 156785655 | NTRK1, SH2D2A |
| chr1 | 156811847 | 156812010 | INSRR, NTRK1  |
| chr1 | 156830701 | 156830963 | NTRK1         |
| chr1 | 156834120 | 156834245 | NTRK1         |
| chr1 | 156834494 | 156834616 | NTRK1         |
| chr1 | 156836676 | 156836795 | NTRK1         |
| chr1 | 156837870 | 156838066 | NTRK1         |
| chr1 | 156838271 | 156838464 | NTRK1         |
| chr1 | 156841389 | 156841572 | NTRK1         |
| chr1 | 156843399 | 156843776 | NTRK1         |
| chr1 | 156844149 | 156844217 | NTRK1         |
| chr1 | 156844337 | 156844443 | NTRK1         |
| chr1 | 156844672 | 156844825 | NTRK1         |
| chr1 | 156845286 | 156845483 | NTRK1         |
| chr1 | 156845837 | 156846027 | NTRK1         |
| chr1 | 156846166 | 156846389 | NTRK1         |
| chr1 | 156848888 | 156849179 | NTRK1         |
| chr1 | 156849765 | 156849974 | NTRK1         |
| chr1 | 156851223 | 156851459 | NTRK1         |
| chr1 | 162688828 | 162688960 | DDR2          |
| chr1 | 162722859 | 162723012 | DDR2          |
| chr1 | 162724388 | 162724670 | DDR2          |
| chr1 | 162724920 | 162725118 | DDR2          |
| chr1 | 162725428 | 162725584 | DDR2          |
| chr1 | 162729560 | 162729794 | DDR2          |
| chr1 | 162730975 | 162731269 | DDR2          |
| chr1 | 162735765 | 162735878 | DDR2          |
| chr1 | 162736993 | 162737174 | DDR2          |
| chr1 | 162740066 | 162740327 | DDR2          |
| chr1 | 162741788 | 162742062 | DDR2          |
| chr1 | 162743233 | 162743411 | DDR2          |
| chr1 | 162745416 | 162745658 | DDR2          |
| chr1 | 162745900 | 162746185 | DDR2          |
| chr1 | 162748344 | 162748544 | DDR2          |
| chr1 | 162749876 | 162750061 | DDR2          |
| chr1 | 169483525 | 169483722 | F5            |
| chr1 | 169484656 | 169484889 | F5            |
| chr1 | 169487624 | 169487826 | F5            |
| chr1 | 169489732 | 169489927 | F5            |
| chr1 | 169492409 | 169492615 | F5            |
| chr1 | 169493013 | 169493167 | F5            |
| chr1 | 169494049 | 169494171 | F5            |
| chr1 | 169495113 | 169495280 | F5            |
| chr1 | 169497127 | 169497357 | F5            |
| chr1 | 169498820 | 169499081 | F5            |
| chr1 | 169499998 | 169500285 | F5            |
| chr1 | 169505718 | 169505943 | F5            |
| chr1 | 169509506 | 169512377 | F5            |
| chr1 | 169513508 | 169513786 | F5            |
| chr1 | 169515654 | 169515855 | F5            |
| chr1 | 169519013 | 169519278 | F5            |
| chr1 | 169519852 | 169520002 | F5            |
| chr1 | 169521769 | 169521997 | F5            |
| chr1 | 169524394 | 169524610 | F5            |
| chr1 | 169525858 | 169526130 | F5            |
| chr1 | 169528365 | 169528559 | F5            |
| chr1 | 169529766 | 169530029 | F5            |
| chr1 | 169541433 | 169541606 | F5            |
| chr1 | 169551643 | 169551785 | F5            |
| chr1 | 169555441 | 169555649 | F5            |
| chr1 | 179076827 | 179078601 | ABL2          |
| chr1 | 179079391 | 179079615 | ABL2          |
| chr1 | 179079914 | 179080005 | ABL2          |
| chr1 | 179081418 | 179081558 | ABL2          |
| chr1 | 179083987 | 179084190 | ABL2          |
| chr1 | 179086373 | 179086676 | ABL2          |
| chr1 | 179087696 | 179087924 | ABL2          |
| chr1 | 179089299 | 179089434 | ABL2          |
| chr1 | 179090704 | 179091027 | ABL2          |
| chr1 | 179095486 | 179095832 | ABL2          |
| chr1 | 179100420 | 179100641 | ABL2          |
| chr1 | 179102421 | 179102534 | ABL2          |
| chr1 | 179112042 | 179112204 | ABL2          |

|      |           |           |                 |
|------|-----------|-----------|-----------------|
| chr1 | 179198350 | 179198557 | ABL2            |
| chr1 | 183711267 | 183711449 | RGL1            |
| chr1 | 183774406 | 183774483 | RGL1            |
| chr1 | 183775483 | 183775644 | RGL1            |
| chr1 | 183816674 | 183816933 | RGL1            |
| chr1 | 183835104 | 183835232 | RGL1            |
| chr1 | 183849724 | 183849959 | RGL1            |
| chr1 | 183852894 | 183853069 | RGL1            |
| chr1 | 183853831 | 183854097 | RGL1            |
| chr1 | 183857582 | 183857736 | RGL1            |
| chr1 | 183861185 | 183861320 | RGL1            |
| chr1 | 183866916 | 183867056 | RGL1            |
| chr1 | 183869258 | 183869395 | RGL1            |
| chr1 | 183871676 | 183871759 | RGL1            |
| chr1 | 183873958 | 183874130 | RGL1            |
| chr1 | 183876120 | 183876260 | RGL1            |
| chr1 | 183881190 | 183881427 | RGL1            |
| chr1 | 183885553 | 183885860 | RGL1            |
| chr1 | 183891330 | 183891495 | RGL1            |
| chr1 | 183895213 | 183895451 | RGL1            |
| chr1 | 186643459 | 186643919 | PTGS2           |
| chr1 | 186644355 | 186644553 | PTGS2           |
| chr1 | 186645004 | 186645341 | PTGS2           |
| chr1 | 186645573 | 186645870 | PTGS2           |
| chr1 | 186645939 | 186646073 | PTGS2           |
| chr1 | 186646755 | 186646987 | PTGS2           |
| chr1 | 186647367 | 186647561 | PTGS2           |
| chr1 | 186648164 | 186648358 | PTGS2           |
| chr1 | 186648428 | 186648595 | PTGS2           |
| chr1 | 186649345 | 186649447 | PTGS2           |
| chr1 | 193091305 | 193091486 | CDC73           |
| chr1 | 193094216 | 193094372 | CDC73           |
| chr1 | 193099278 | 193099398 | CDC73           |
| chr1 | 193104495 | 193104608 | CDC73           |
| chr1 | 193104641 | 193104744 | CDC73           |
| chr1 | 193107189 | 193107328 | CDC73           |
| chr1 | 193110954 | 193111221 | CDC73           |
| chr1 | 193116971 | 193117120 | CDC73           |
| chr1 | 193119408 | 193119537 | CDC73           |
| chr1 | 193121484 | 193121599 | CDC73           |
| chr1 | 193172899 | 193173007 | CDC73           |
| chr1 | 193181169 | 193181255 | CDC73           |
| chr1 | 193181494 | 193181632 | CDC73           |
| chr1 | 193202097 | 193202309 | CDC73           |
| chr1 | 193205360 | 193205511 | CDC73           |
| chr1 | 193218834 | 193219026 | CDC73           |
| chr1 | 193219780 | 193219867 | CDC73           |
| chr1 | 204494621 | 204494749 | MDM4            |
| chr1 | 204495462 | 204495587 | MDM4            |
| chr1 | 204499786 | 204499970 | MDM4            |
| chr1 | 204501293 | 204501399 | MDM4            |
| chr1 | 204501871 | 204501972 | MDM4            |
| chr1 | 204506020 | 204506072 | MDM4            |
| chr1 | 204506532 | 204506650 | MDM4            |
| chr1 | 204507311 | 204507461 | MDM4            |
| chr1 | 204511886 | 204512097 | MDM4            |
| chr1 | 204513637 | 204513837 | MDM4            |
| chr1 | 204515899 | 204516030 | MDM4            |
| chr1 | 204518215 | 204518835 | MDM4            |
| chr1 | 204527743 | 204527834 | MDM4            |
| chr1 | 206646545 | 206646682 | IKBKE           |
| chr1 | 206647648 | 206647839 | IKBKE           |
| chr1 | 206648182 | 206648362 | IKBKE           |
| chr1 | 206649498 | 206649730 | IKBKE           |
| chr1 | 206649995 | 206650206 | IKBKE           |
| chr1 | 206651066 | 206651227 | IKBKE           |
| chr1 | 206651477 | 206651707 | IKBKE           |
| chr1 | 206652260 | 206652501 | IKBKE           |
| chr1 | 206653187 | 206653302 | IKBKE           |
| chr1 | 206653339 | 206653481 | IKBKE           |
| chr1 | 206653764 | 206653901 | IKBKE           |
| chr1 | 206658308 | 206658434 | IKBKE           |
| chr1 | 206658505 | 206658668 | IKBKE           |
| chr1 | 206661225 | 206661352 | IKBKE           |
| chr1 | 206664126 | 206664216 | IKBKE           |
| chr1 | 206664955 | 206665107 | C1ORF147, IKBKE |
| chr1 | 206666330 | 206666477 | C1ORF147, IKBKE |
| chr1 | 206666573 | 206666736 | C1ORF147, IKBKE |
| chr1 | 206667227 | 206667349 | C1ORF147, IKBKE |
| chr1 | 206669419 | 206669503 | C1ORF147, IKBKE |
| chr1 | 226252027 | 226252205 | H3F3A           |
| chr1 | 226253331 | 226253625 | H3F3A           |
| chr1 | 226259026 | 226259205 | H3F3A           |
| chr1 | 243663019 | 243663113 | AKT3, SDCCAG8   |
| chr1 | 243668525 | 243668661 | AKT3            |
| chr1 | 243675600 | 243675753 | AKT3            |
| chr1 | 243708786 | 243708924 | AKT3            |
| chr1 | 243716005 | 243716270 | AKT3            |
| chr1 | 243726996 | 243727175 | AKT3            |
| chr1 | 243736202 | 243736375 | AKT3            |
| chr1 | 243776947 | 243777066 | AKT3            |
| chr1 | 243778372 | 243778488 | AKT3            |
| chr1 | 243800887 | 243801069 | AKT3            |
| chr1 | 243809169 | 243809364 | AKT3            |
| chr1 | 243828048 | 243828210 | AKT3            |
| chr1 | 243858867 | 243859043 | AKT3            |

|      |           |           |              |
|------|-----------|-----------|--------------|
| chr1 | 244006401 | 244006497 | AKT3         |
| chr2 | 16082161  | 16083001  | MYCN, MYCNOS |
| chr2 | 16085589  | 16086244  | MYCN         |
| chr2 | 25457122  | 25457314  | DNMT3A       |
| chr2 | 25458550  | 25458719  | DNMT3A       |
| chr2 | 25459779  | 25459899  | DNMT3A       |
| chr2 | 25461973  | 25462109  | DNMT3A       |
| chr2 | 25463145  | 25463344  | DNMT3A       |
| chr2 | 25463483  | 25463624  | DNMT3A       |
| chr2 | 25464405  | 25464601  | DNMT3A       |
| chr2 | 25466741  | 25466876  | DNMT3A       |
| chr2 | 25466998  | 25467232  | DNMT3A       |
| chr2 | 25467383  | 25467546  | DNMT3A       |
| chr2 | 25468096  | 25468226  | DNMT3A       |
| chr2 | 25468863  | 25468958  | DNMT3A       |
| chr2 | 25469003  | 25469203  | DNMT3A       |
| chr2 | 25469463  | 25469670  | DNMT3A       |
| chr2 | 25469894  | 25470052  | DNMT3A       |
| chr2 | 25470434  | 25470643  | DNMT3A       |
| chr2 | 25470880  | 25471146  | DNMT3A       |
| chr2 | 25472500  | 25472618  | DNMT3A       |
| chr2 | 25475037  | 25475091  | DNMT3A       |
| chr2 | 25497784  | 25497981  | DNMT3A       |
| chr2 | 25498343  | 25498437  | DNMT3A       |
| chr2 | 25505231  | 25505605  | DNMT3A       |
| chr2 | 25522982  | 25523137  | DNMT3A       |
| chr2 | 25536756  | 25536878  | DNMT3A       |
| chr2 | 29416064  | 29416813  | ALK          |
| chr2 | 29419610  | 29419751  | ALK          |
| chr2 | 29420382  | 29420567  | ALK          |
| chr2 | 29430011  | 29430163  | ALK          |
| chr2 | 29430885  | 29430936  | ALK          |
| chr2 | 29432626  | 29432769  | ALK          |
| chr2 | 29436824  | 29436972  | ALK          |
| chr2 | 29443546  | 29443726  | ALK          |
| chr2 | 29445184  | 29445299  | ALK          |
| chr2 | 29445357  | 29445498  | ALK          |
| chr2 | 29446182  | 29446419  | ALK          |
| chr2 | 29448301  | 29448456  | ALK          |
| chr2 | 29449762  | 29449965  | ALK          |
| chr2 | 29450414  | 29450563  | ALK          |
| chr2 | 29451724  | 29451957  | ALK          |
| chr2 | 29455144  | 29455339  | ALK          |
| chr2 | 29456405  | 29456587  | ALK          |
| chr2 | 29462520  | 29462721  | ALK          |
| chr2 | 29473945  | 29474158  | ALK          |
| chr2 | 29497939  | 29498118  | ALK          |
| chr2 | 29498242  | 29498387  | ALK          |
| chr2 | 29519728  | 29519948  | ALK          |
| chr2 | 29541144  | 29541295  | ALK          |
| chr2 | 29543591  | 29543773  | ALK          |
| chr2 | 29551190  | 29551372  | ALK          |
| chr2 | 29606572  | 29606750  | ALK          |
| chr2 | 29754755  | 29755007  | ALK          |
| chr2 | 29917690  | 29917905  | ALK          |
| chr2 | 29940414  | 29940588  | ALK          |
| chr2 | 30142833  | 30143550  | ALK          |
| chr2 | 47630305  | 47630566  | MSH2         |
| chr2 | 47635514  | 47635719  | MSH2         |
| chr2 | 47637207  | 47637536  | MSH2         |
| chr2 | 47639527  | 47639724  | MSH2         |
| chr2 | 47641382  | 47641582  | MSH2         |
| chr2 | 47643409  | 47643593  | MSH2         |
| chr2 | 47656855  | 47657105  | MSH2         |
| chr2 | 47672661  | 47672821  | MSH2         |
| chr2 | 47690144  | 47690318  | MSH2         |
| chr2 | 47691393  | 47691490  | MSH2         |
| chr2 | 47693771  | 47693972  | MSH2         |
| chr2 | 47698078  | 47698226  | MSH2         |
| chr2 | 47702138  | 47702434  | MSH2         |
| chr2 | 47703480  | 47703735  | MSH2         |
| chr2 | 47705385  | 47705683  | MSH2         |
| chr2 | 47707809  | 47708035  | MSH2         |
| chr2 | 47709892  | 47710113  | MSH2         |
| chr2 | 47739416  | 47739598  | MSH2         |
| chr2 | 48010347  | 48010657  | MSH6         |
| chr2 | 48018040  | 48018287  | FBXO11, MSH6 |
| chr2 | 48023007  | 48023227  | FBXO11, MSH6 |
| chr2 | 48025724  | 48028354  | FBXO11, MSH6 |
| chr2 | 48030533  | 48030849  | FBXO11, MSH6 |
| chr2 | 48032023  | 48032191  | FBXO11, MSH6 |
| chr2 | 48032731  | 48032871  | FBXO11, MSH6 |
| chr2 | 48033317  | 48033522  | FBXO11, MSH6 |
| chr2 | 48033565  | 48033815  | FBXO11, MSH6 |
| chr2 | 48033892  | 48034024  | FBXO11, MSH6 |
| chr2 | 58386874  | 58386960  | FANCL, VRK2  |
| chr2 | 58387217  | 58387339  | FANCL        |
| chr2 | 58388631  | 58388798  | FANCL        |
| chr2 | 58389975  | 58390107  | FANCL        |
| chr2 | 58390138  | 58390234  | FANCL        |
| chr2 | 58390543  | 58390677  | FANCL        |
| chr2 | 58392833  | 58393034  | FANCL        |
| chr2 | 58425688  | 58425822  | FANCL        |
| chr2 | 58431239  | 58431386  | FANCL        |
| chr2 | 58449051  | 58449202  | FANCL        |
| chr2 | 58453837  | 58453944  | FANCL        |

|      |           |           |        |
|------|-----------|-----------|--------|
| chr2 | 58456923  | 58457034  | FANCL  |
| chr2 | 58459163  | 58459272  | FANCL  |
| chr2 | 58468327  | 58468473  | FANCL  |
| chr2 | 140990729 | 140990920 | LRP1B  |
| chr2 | 140992329 | 140992478 | LRP1B  |
| chr2 | 140995695 | 140995890 | LRP1B  |
| chr2 | 140996985 | 140997126 | LRP1B  |
| chr2 | 141004629 | 141004756 | LRP1B  |
| chr2 | 141027785 | 141027940 | LRP1B  |
| chr2 | 141031967 | 141032192 | LRP1B  |
| chr2 | 141055351 | 141055563 | LRP1B  |
| chr2 | 141072478 | 141072693 | LRP1B  |
| chr2 | 141079506 | 141079682 | LRP1B  |
| chr2 | 141081436 | 141081660 | LRP1B  |
| chr2 | 141083305 | 141083472 | LRP1B  |
| chr2 | 141091996 | 141092153 | LRP1B  |
| chr2 | 141093158 | 141093432 | LRP1B  |
| chr2 | 141108340 | 141108632 | LRP1B  |
| chr2 | 141110496 | 141110666 | LRP1B  |
| chr2 | 141113885 | 141114070 | LRP1B  |
| chr2 | 141115522 | 141115710 | LRP1B  |
| chr2 | 141116364 | 141116540 | LRP1B  |
| chr2 | 141122204 | 141122377 | LRP1B  |
| chr2 | 141128253 | 141128436 | LRP1B  |
| chr2 | 141128722 | 141128879 | LRP1B  |
| chr2 | 141130551 | 141130731 | LRP1B  |
| chr2 | 141135723 | 141135880 | LRP1B  |
| chr2 | 141143436 | 141143603 | LRP1B  |
| chr2 | 141200047 | 141200217 | LRP1B  |
| chr2 | 141201873 | 141202043 | LRP1B  |
| chr2 | 141202106 | 141202273 | LRP1B  |
| chr2 | 141208111 | 141208255 | LRP1B  |
| chr2 | 141213998 | 141214197 | LRP1B  |
| chr2 | 141215006 | 141215245 | LRP1B  |
| chr2 | 141232681 | 141232931 | LRP1B  |
| chr2 | 141242886 | 141243118 | LRP1B  |
| chr2 | 141245160 | 141245333 | LRP1B  |
| chr2 | 141250151 | 141250287 | LRP1B  |
| chr2 | 141253108 | 141253342 | LRP1B  |
| chr2 | 141259230 | 141259468 | LRP1B  |
| chr2 | 141260506 | 141260697 | LRP1B  |
| chr2 | 141264339 | 141264512 | LRP1B  |
| chr2 | 141267471 | 141267650 | LRP1B  |
| chr2 | 141272196 | 141272366 | LRP1B  |
| chr2 | 141274432 | 141274605 | LRP1B  |
| chr2 | 141283387 | 141283587 | LRP1B  |
| chr2 | 141283780 | 141283944 | LRP1B  |
| chr2 | 141291564 | 141291734 | LRP1B  |
| chr2 | 141294124 | 141294303 | LRP1B  |
| chr2 | 141298516 | 141298692 | LRP1B  |
| chr2 | 141299322 | 141299565 | LRP1B  |
| chr2 | 141356174 | 141356429 | LRP1B  |
| chr2 | 141358993 | 141359233 | LRP1B  |
| chr2 | 141457793 | 141458215 | LRP1B  |
| chr2 | 141459264 | 141459439 | LRP1B  |
| chr2 | 141459684 | 141459886 | LRP1B  |
| chr2 | 141459970 | 141460147 | LRP1B  |
| chr2 | 141473516 | 141473696 | LRP1B  |
| chr2 | 141474225 | 141474410 | LRP1B  |
| chr2 | 141526756 | 141526938 | LRP1B  |
| chr2 | 141528424 | 141528600 | LRP1B  |
| chr2 | 141533641 | 141533832 | LRP1B  |
| chr2 | 141571200 | 141571400 | LRP1B  |
| chr2 | 141597534 | 141597679 | LRP1B  |
| chr2 | 141598461 | 141598686 | LRP1B  |
| chr2 | 141607645 | 141607923 | LRP1B  |
| chr2 | 141609195 | 141609377 | LRP1B  |
| chr2 | 141625133 | 141625428 | LRP1B  |
| chr2 | 141625642 | 141625857 | LRP1B  |
| chr2 | 141641360 | 141641615 | LRP1B  |
| chr2 | 141643681 | 141643929 | LRP1B  |
| chr2 | 141660463 | 141660759 | LRP1B  |
| chr2 | 141665420 | 141665671 | LRP1B  |
| chr2 | 141680508 | 141680741 | LRP1B  |
| chr2 | 141707778 | 141707996 | LRP1B  |
| chr2 | 141709403 | 141709534 | LRP1B  |
| chr2 | 141739703 | 141739870 | LRP1B  |
| chr2 | 141747075 | 141747251 | LRP1B  |
| chr2 | 141751538 | 141751729 | LRP1B  |
| chr2 | 141762878 | 141763051 | LRP1B  |
| chr2 | 141771099 | 141771339 | LRP1B  |
| chr2 | 141773239 | 141773509 | LRP1B  |
| chr2 | 141777465 | 141777696 | LRP1B  |
| chr2 | 141806529 | 141806816 | LRP1B  |
| chr2 | 141812659 | 141812853 | LRP1B  |
| chr2 | 141816426 | 141816648 | LRP1B  |
| chr2 | 141819594 | 141819867 | LRP1B  |
| chr2 | 141945964 | 141946177 | LRP1B  |
| chr2 | 141986726 | 141987034 | LRP1B  |
| chr2 | 142004769 | 142004948 | LRP1B  |
| chr2 | 142012065 | 142012235 | LRP1B  |
| chr2 | 142044303 | 142044376 | LRP1B  |
| chr2 | 142237908 | 142238144 | LRP1B  |
| chr2 | 142567822 | 142567995 | LRP1B  |
| chr2 | 142888191 | 142888323 | LRP1B  |
| chr2 | 178095487 | 178096761 | NFE2L2 |

|      |           |           |                                                                         |
|------|-----------|-----------|-------------------------------------------------------------------------|
| chr2 | 178097094 | 178097336 | NFE2L2                                                                  |
| chr2 | 178097880 | 178098092 | NFE2L2                                                                  |
| chr2 | 178098707 | 178099024 | NFE2L2                                                                  |
| chr2 | 178129234 | 178129329 | NFE2L2                                                                  |
| chr2 | 198257001 | 198257210 | SF3B1                                                                   |
| chr2 | 198257670 | 198257937 | SF3B1                                                                   |
| chr2 | 198260754 | 198261077 | SF3B1                                                                   |
| chr2 | 198262683 | 198262865 | SF3B1                                                                   |
| chr2 | 198263159 | 198263330 | SF3B1                                                                   |
| chr2 | 198264753 | 198264915 | SF3B1                                                                   |
| chr2 | 198264950 | 198265183 | SF3B1                                                                   |
| chr2 | 198265413 | 198265685 | SF3B1                                                                   |
| chr2 | 198266098 | 198266274 | SF3B1                                                                   |
| chr2 | 198266440 | 198266637 | SF3B1                                                                   |
| chr2 | 198266683 | 198266879 | SF3B1                                                                   |
| chr2 | 198267254 | 198267575 | SF3B1                                                                   |
| chr2 | 198267647 | 198267784 | SF3B1                                                                   |
| chr2 | 198268283 | 198268513 | SF3B1                                                                   |
| chr2 | 198269774 | 198269926 | SF3B1                                                                   |
| chr2 | 198269973 | 198270221 | SF3B1                                                                   |
| chr2 | 198272696 | 198272868 | SF3B1                                                                   |
| chr2 | 198273067 | 198273330 | SF3B1                                                                   |
| chr2 | 198274468 | 198274756 | SF3B1                                                                   |
| chr2 | 198281439 | 198281660 | SF3B1                                                                   |
| chr2 | 198283207 | 198283337 | SF3B1                                                                   |
| chr2 | 198283630 | 198283700 | SF3B1                                                                   |
| chr2 | 198285076 | 198285291 | SF3B1                                                                   |
| chr2 | 198285727 | 198285882 | SF3B1                                                                   |
| chr2 | 198288506 | 198288723 | SF3B1                                                                   |
| chr2 | 198299670 | 198299748 | SF3B1                                                                   |
| chr2 | 209101777 | 209101918 | IDH1                                                                    |
| chr2 | 209103769 | 209103982 | IDH1                                                                    |
| chr2 | 209104561 | 209104752 | IDH1                                                                    |
| chr2 | 209106692 | 209106894 | IDH1                                                                    |
| chr2 | 209108125 | 209108353 | IDH1                                                                    |
| chr2 | 209110017 | 209110173 | IDH1                                                                    |
| chr2 | 209113067 | 209113409 | IDH1                                                                    |
| chr2 | 209116128 | 209116300 | IDH1                                                                    |
| chr2 | 212248314 | 212248810 | ERBB4                                                                   |
| chr2 | 212251552 | 212251900 | ERBB4                                                                   |
| chr2 | 212252644 | 212252742 | ERBB4                                                                   |
| chr2 | 212285140 | 212285361 | ERBB4                                                                   |
| chr2 | 212286706 | 212286854 | ERBB4                                                                   |
| chr2 | 212288854 | 212289051 | ERBB4                                                                   |
| chr2 | 212293107 | 212293233 | ERBB4                                                                   |
| chr2 | 212295644 | 212295850 | ERBB4                                                                   |
| chr2 | 212426602 | 212426838 | ERBB4                                                                   |
| chr2 | 212483876 | 212484025 | ERBB4                                                                   |
| chr2 | 212488621 | 212488794 | ERBB4                                                                   |
| chr2 | 212495161 | 212495344 | ERBB4                                                                   |
| chr2 | 212522453 | 212522578 | ERBB4                                                                   |
| chr2 | 212522649 | 212522744 | ERBB4                                                                   |
| chr2 | 212530022 | 212530227 | ERBB4                                                                   |
| chr2 | 212537863 | 212538007 | ERBB4                                                                   |
| chr2 | 212543751 | 212543934 | ERBB4                                                                   |
| chr2 | 212566666 | 212566916 | ERBB4                                                                   |
| chr2 | 212568803 | 212568944 | ERBB4                                                                   |
| chr2 | 212570017 | 212570141 | ERBB4                                                                   |
| chr2 | 212576749 | 212576926 | ERBB4                                                                   |
| chr2 | 212578234 | 212578398 | ERBB4                                                                   |
| chr2 | 212587092 | 212587284 | ERBB4                                                                   |
| chr2 | 212589775 | 212589944 | ERBB4                                                                   |
| chr2 | 212615338 | 212615454 | ERBB4                                                                   |
| chr2 | 212652724 | 212652909 | ERBB4                                                                   |
| chr2 | 212812129 | 212812366 | ERBB4                                                                   |
| chr2 | 212989451 | 212989653 | ERBB4                                                                   |
| chr2 | 213403147 | 213403279 | ERBB4                                                                   |
| chr2 | 215593374 | 215593757 | BARD1                                                                   |
| chr2 | 215595109 | 215595257 | BARD1                                                                   |
| chr2 | 215595606 | 215595672 | BARD1                                                                   |
| chr2 | 215609765 | 215609908 | BARD1                                                                   |
| chr2 | 215610420 | 215610603 | BARD1                                                                   |
| chr2 | 215617145 | 215617304 | BARD1                                                                   |
| chr2 | 215632180 | 215632403 | BARD1                                                                   |
| chr2 | 215633930 | 215634061 | BARD1                                                                   |
| chr2 | 215645258 | 215646258 | BARD1                                                                   |
| chr2 | 215656995 | 215657194 | BARD1                                                                   |
| chr2 | 215661759 | 215661866 | BARD1                                                                   |
| chr2 | 215674110 | 215674318 | BARD1                                                                   |
| chr2 | 234668908 | 234669822 | UGT1A1, UGT1A10, UGT1A3, UGT1A4, UGT1A5, UGT1A6, UGT1A7, UGT1A8, UGT1A9 |
| chr2 | 234675654 | 234675836 | UGT1A1, UGT1A10, UGT1A3, UGT1A4, UGT1A5, UGT1A6, UGT1A7, UGT1A8, UGT1A9 |
| chr2 | 234676469 | 234676607 | UGT1A1, UGT1A10, UGT1A3, UGT1A4, UGT1A5, UGT1A6, UGT1A7, UGT1A8, UGT1A9 |
| chr2 | 234676840 | 234677110 | UGT1A1, UGT1A10, UGT1A3, UGT1A4, UGT1A5, UGT1A6, UGT1A7, UGT1A8, UGT1A9 |
| chr2 | 234678151 | 234678232 | UGT1A1, UGT1A10, UGT1A3, UGT1A4, UGT1A5, UGT1A6, UGT1A7, UGT1A8, UGT1A9 |
| chr2 | 234680882 | 234681230 | UGT1A1, UGT1A10, UGT1A3, UGT1A4, UGT1A5, UGT1A6, UGT1A7, UGT1A8, UGT1A9 |
| chr3 | 10070316  | 10070430  | FANCD2                                                                  |
| chr3 | 10074490  | 10074681  | FANCD2                                                                  |
| chr3 | 10076127  | 10076245  | FANCD2                                                                  |
| chr3 | 10076353  | 10076507  | FANCD2                                                                  |
| chr3 | 10076831  | 10076942  | FANCD2                                                                  |
| chr3 | 10077945  | 10078048  | FANCD2                                                                  |
| chr3 | 10080937  | 10081066  | FANCD2                                                                  |
| chr3 | 10081379  | 10081585  | FANCD2                                                                  |
| chr3 | 10083281  | 10083419  | FANCD2                                                                  |
| chr3 | 10084217  | 10084372  | FANCD2                                                                  |
| chr3 | 10084708  | 10084859  | FANCD2                                                                  |



|      |          |          |                  |
|------|----------|----------|------------------|
| chr3 | 10085142 | 10085301 | FANCD2           |
| chr3 | 10085487 | 10085573 | FANCD2           |
| chr3 | 10088238 | 10088432 | FANCD2           |
| chr3 | 10089575 | 10089760 | FANCD2           |
| chr3 | 10091032 | 10091214 | FANCD2           |
| chr3 | 10094045 | 10094206 | FANCD2           |
| chr3 | 10101952 | 10102112 | FANCD2           |
| chr3 | 10103809 | 10103920 | FANCD2           |
| chr3 | 10105450 | 10105620 | FANCD2           |
| chr3 | 10106014 | 10106138 | FANCD2           |
| chr3 | 10106387 | 10106584 | FANCD2           |
| chr3 | 10107052 | 10107203 | FANCD2           |
| chr3 | 10107522 | 10107688 | FANCD2           |
| chr3 | 10108867 | 10109026 | FANCD2           |
| chr3 | 10114529 | 10114690 | FANCD2           |
| chr3 | 10114911 | 10115071 | FANCD2           |
| chr3 | 10116188 | 10116382 | FANCD2           |
| chr3 | 10119739 | 10119906 | FANCD2           |
| chr3 | 10122758 | 10122937 | FANCD2           |
| chr3 | 10123004 | 10123173 | FANCD2, FANCD2OS |
| chr3 | 10127470 | 10127631 | FANCD2, FANCD2OS |
| chr3 | 10128792 | 10128973 | FANCD2, FANCD2OS |
| chr3 | 10130107 | 10130251 | FANCD2, FANCD2OS |
| chr3 | 10130486 | 10130659 | FANCD2, FANCD2OS |
| chr3 | 10131950 | 10132094 | FANCD2, FANCD2OS |
| chr3 | 10133839 | 10133961 | FANCD2, FANCD2OS |
| chr3 | 10134943 | 10135032 | FANCD2, FANCD2OS |
| chr3 | 10135947 | 10136072 | FANCD2, FANCD2OS |
| chr3 | 10136858 | 10136983 | FANCD2, FANCD2OS |
| chr3 | 10137984 | 10138181 | FANCD2, FANCD2OS |
| chr3 | 10140378 | 10140659 | FANCD2, FANCD2OS |
| chr3 | 10142846 | 10142971 | FANCD2, FANCD2OS |
| chr3 | 10183506 | 10183896 | VHL              |
| chr3 | 10188172 | 10188345 | VHL              |
| chr3 | 10191445 | 10191674 | VHL              |
| chr3 | 12625987 | 12626181 | RAF1             |
| chr3 | 12626320 | 12626505 | RAF1             |
| chr3 | 12626595 | 12626777 | RAF1             |
| chr3 | 12627154 | 12627323 | RAF1             |
| chr3 | 12629064 | 12629161 | RAF1             |
| chr3 | 12632271 | 12632498 | RAF1             |
| chr3 | 12633181 | 12633316 | RAF1             |
| chr3 | 12641164 | 12641332 | RAF1             |
| chr3 | 12641625 | 12641803 | RAF1             |
| chr3 | 12641861 | 12641939 | RAF1             |
| chr3 | 12644951 | 12645061 | RAF1             |
| chr3 | 12645609 | 12645813 | RAF1             |
| chr3 | 12647674 | 12647823 | RAF1             |
| chr3 | 12650239 | 12650447 | RAF1             |
| chr3 | 12650706 | 12650859 | RAF1             |
| chr3 | 12653423 | 12653586 | RAF1             |
| chr3 | 12659988 | 12660245 | RAF1             |
| chr3 | 30648350 | 30648494 | TGFBR2           |
| chr3 | 30664665 | 30664790 | TGFBR2           |
| chr3 | 30686213 | 30686432 | TGFBR2           |
| chr3 | 30691736 | 30691977 | TGFBR2           |
| chr3 | 30702998 | 30703156 | TGFBR2           |
| chr3 | 30713104 | 30713954 | TGFBR2           |
| chr3 | 30715571 | 30715763 | TGFBR2           |
| chr3 | 30729850 | 30730028 | TGFBR2           |
| chr3 | 30732886 | 30733116 | TGFBR2           |
| chr3 | 37035013 | 37035179 | MLH1             |
| chr3 | 37038084 | 37038225 | MLH1             |
| chr3 | 37042420 | 37042569 | MLH1             |
| chr3 | 37045866 | 37045990 | MLH1             |
| chr3 | 37048456 | 37048579 | MLH1             |
| chr3 | 37050279 | 37050421 | MLH1             |
| chr3 | 37053285 | 37053378 | MLH1             |
| chr3 | 37053476 | 37053615 | MLH1             |
| chr3 | 37055897 | 37056060 | MLH1             |
| chr3 | 37058971 | 37059115 | MLH1             |
| chr3 | 37061775 | 37061979 | MLH1             |
| chr3 | 37067102 | 37067523 | MLH1             |
| chr3 | 37070249 | 37070448 | MLH1             |
| chr3 | 37081651 | 37081810 | MLH1             |
| chr3 | 37083727 | 37083847 | MLH1             |
| chr3 | 37088984 | 37089199 | MLH1             |
| chr3 | 37089982 | 37090125 | MLH1             |
| chr3 | 37090369 | 37090533 | MLH1             |
| chr3 | 37091951 | 37092169 | MLH1             |
| chr3 | 37107082 | 37107135 | LRRFIP2, MLH1    |
| chr3 | 38180127 | 38180544 | MYD88            |
| chr3 | 38181329 | 38181514 | MYD88            |
| chr3 | 38181853 | 38182108 | MYD88            |
| chr3 | 38182222 | 38182364 | MYD88            |
| chr3 | 38182597 | 38182802 | MYD88            |
| chr3 | 38591786 | 38593074 | SCN5A            |
| chr3 | 38595744 | 38596065 | SCN5A            |
| chr3 | 38597121 | 38597276 | SCN5A            |
| chr3 | 38597906 | 38598094 | SCN5A            |
| chr3 | 38598696 | 38598800 | SCN5A            |
| chr3 | 38601612 | 38601944 | SCN5A            |
| chr3 | 38603880 | 38604053 | SCN5A            |
| chr3 | 38607874 | 38608098 | SCN5A            |
| chr3 | 38616762 | 38616967 | SCN5A            |
| chr3 | 38618126 | 38618297 | SCN5A            |

|      |          |          |              |
|------|----------|----------|--------------|
| chr3 | 38620799 | 38621011 | SCN5A        |
| chr3 | 38622396 | 38622887 | SCN5A        |
| chr3 | 38627156 | 38627557 | SCN5A        |
| chr3 | 38628865 | 38629089 | SCN5A        |
| chr3 | 38639194 | 38639483 | SCN5A        |
| chr3 | 38640383 | 38640566 | SCN5A        |
| chr3 | 38645177 | 38645599 | SCN5A        |
| chr3 | 38646194 | 38646424 | SCN5A        |
| chr3 | 38647416 | 38647664 | SCN5A        |
| chr3 | 38648134 | 38648326 | SCN5A        |
| chr3 | 38649616 | 38649730 | SCN5A        |
| chr3 | 38651199 | 38651480 | SCN5A        |
| chr3 | 38655208 | 38655350 | SCN5A        |
| chr3 | 38655440 | 38655582 | SCN5A        |
| chr3 | 38662308 | 38662487 | SCN5A        |
| chr3 | 38663865 | 38664005 | SCN5A        |
| chr3 | 38671776 | 38671945 | SCN5A        |
| chr3 | 38674500 | 38674823 | SCN5A        |
| chr3 | 41265534 | 41265597 | CTNNB1       |
| chr3 | 41265991 | 41266269 | CTNNB1       |
| chr3 | 41266419 | 41266723 | CTNNB1       |
| chr3 | 41266799 | 41267088 | CTNNB1       |
| chr3 | 41267125 | 41267377 | CTNNB1       |
| chr3 | 41268673 | 41268868 | CTNNB1       |
| chr3 | 41274806 | 41274960 | CTNNB1       |
| chr3 | 41274994 | 41275383 | CTNNB1       |
| chr3 | 41275604 | 41275813 | CTNNB1       |
| chr3 | 41277189 | 41277359 | CTNNB1       |
| chr3 | 41277814 | 41278015 | CTNNB1       |
| chr3 | 41278053 | 41278225 | CTNNB1       |
| chr3 | 41279481 | 41279592 | CTNNB1       |
| chr3 | 41280599 | 41280858 | CTNNB1       |
| chr3 | 47058557 | 47058769 | SETD2        |
| chr3 | 47059102 | 47059254 | SETD2        |
| chr3 | 47061224 | 47061355 | SETD2        |
| chr3 | 47079130 | 47079292 | SETD2        |
| chr3 | 47084025 | 47084215 | SETD2        |
| chr3 | 47087951 | 47088136 | SETD2        |
| chr3 | 47098285 | 47099005 | SETD2        |
| chr3 | 47103627 | 47103861 | SETD2        |
| chr3 | 47108534 | 47108633 | SETD2        |
| chr3 | 47125184 | 47125897 | SETD2        |
| chr3 | 47127659 | 47127829 | SETD2        |
| chr3 | 47129577 | 47129762 | SETD2        |
| chr3 | 47139419 | 47139596 | SETD2        |
| chr3 | 47142922 | 47143070 | SETD2        |
| chr3 | 47144810 | 47144938 | SETD2        |
| chr3 | 47147461 | 47147635 | SETD2        |
| chr3 | 47155340 | 47155519 | SETD2        |
| chr3 | 47158087 | 47158269 | SETD2        |
| chr3 | 47161646 | 47166063 | SETD2        |
| chr3 | 47168112 | 47168178 | SETD2        |
| chr3 | 47169023 | 47169078 | SETD2        |
| chr3 | 47179739 | 47179800 | SETD2        |
| chr3 | 47186973 | 47187032 | SETD2        |
| chr3 | 47199022 | 47199079 | SETD2        |
| chr3 | 47205318 | 47205439 | SETD2        |
| chr3 | 52436278 | 52436462 | BAP1         |
| chr3 | 52436592 | 52436715 | BAP1         |
| chr3 | 52436769 | 52436912 | BAP1         |
| chr3 | 52437128 | 52437339 | BAP1         |
| chr3 | 52437406 | 52437935 | BAP1         |
| chr3 | 52438443 | 52438627 | BAP1         |
| chr3 | 52439100 | 52439335 | BAP1         |
| chr3 | 52439755 | 52439953 | BAP1         |
| chr3 | 52440243 | 52440417 | BAP1         |
| chr3 | 52440819 | 52440948 | BAP1         |
| chr3 | 52441164 | 52441357 | BAP1         |
| chr3 | 52441389 | 52441501 | BAP1         |
| chr3 | 52441948 | 52442118 | BAP1         |
| chr3 | 52442464 | 52442647 | BAP1         |
| chr3 | 52443544 | 52443649 | BAP1         |
| chr3 | 52443704 | 52443784 | BAP1         |
| chr3 | 52443832 | 52443919 | BAP1         |
| chr3 | 52582053 | 52582276 | PBRM1, SMIM4 |
| chr3 | 52584411 | 52584678 | PBRM1, SMIM4 |
| chr3 | 52584737 | 52584858 | PBRM1, SMIM4 |
| chr3 | 52588714 | 52588920 | PBRM1, SMIM4 |
| chr3 | 52592239 | 52592454 | PBRM1, SMIM4 |
| chr3 | 52595757 | 52596009 | PBRM1, SMIM4 |
| chr3 | 52597273 | 52597534 | PBRM1, SMIM4 |
| chr3 | 52598040 | 52598274 | PBRM1, SMIM4 |
| chr3 | 52610531 | 52610739 | PBRM1, SMIM4 |
| chr3 | 52613044 | 52613240 | PBRM1, SMIM4 |
| chr3 | 52620415 | 52620729 | PBRM1        |
| chr3 | 52621343 | 52621551 | PBRM1        |
| chr3 | 52623060 | 52623296 | PBRM1        |
| chr3 | 52637511 | 52637773 | PBRM1        |
| chr3 | 52643303 | 52643996 | PBRM1        |
| chr3 | 52649341 | 52649497 | PBRM1        |
| chr3 | 52651252 | 52651579 | PBRM1        |
| chr3 | 52658887 | 52658982 | PBRM1        |
| chr3 | 52661263 | 52661411 | PBRM1        |
| chr3 | 52662884 | 52663076 | PBRM1        |
| chr3 | 52668592 | 52668856 | PBRM1        |
| chr3 | 52675944 | 52676086 | PBRM1        |

|      |           |           |       |
|------|-----------|-----------|-------|
| chr3 | 52677238  | 52677384  | PBRM1 |
| chr3 | 52678694  | 52678830  | PBRM1 |
| chr3 | 52682334  | 52682483  | PBRM1 |
| chr3 | 52685732  | 52685851  | PBRM1 |
| chr3 | 52692189  | 52692356  | PBRM1 |
| chr3 | 52696123  | 52696317  | PBRM1 |
| chr3 | 52702488  | 52702686  | PBRM1 |
| chr3 | 52712490  | 52712638  | PBRM1 |
| chr3 | 52713564  | 52713752  | PBRM1 |
| chr3 | 69788723  | 69788877  | MITF  |
| chr3 | 69812967  | 69813118  | MITF  |
| chr3 | 69915416  | 69915522  | MITF  |
| chr3 | 69928230  | 69928559  | MITF  |
| chr3 | 69985848  | 69985931  | MITF  |
| chr3 | 69986947  | 69987225  | MITF  |
| chr3 | 69987477  | 69987542  | MITF  |
| chr3 | 69988223  | 69988357  | MITF  |
| chr3 | 69990361  | 69990507  | MITF  |
| chr3 | 69998176  | 69998344  | MITF  |
| chr3 | 70000937  | 70001062  | MITF  |
| chr3 | 70005580  | 70005706  | MITF  |
| chr3 | 70008398  | 70008596  | MITF  |
| chr3 | 70013972  | 70014424  | MITF  |
| chr3 | 71007392  | 71007497  | FOXP1 |
| chr3 | 71008372  | 71008567  | FOXP1 |
| chr3 | 71015015  | 71015232  | FOXP1 |
| chr3 | 71019861  | 71019981  | FOXP1 |
| chr3 | 71021136  | 71021356  | FOXP1 |
| chr3 | 71021680  | 71021852  | FOXP1 |
| chr3 | 71026066  | 71026218  | FOXP1 |
| chr3 | 71026768  | 71026898  | FOXP1 |
| chr3 | 71026953  | 71027205  | FOXP1 |
| chr3 | 71037119  | 71037253  | FOXP1 |
| chr3 | 71050097  | 71050235  | FOXP1 |
| chr3 | 71064674  | 71064829  | FOXP1 |
| chr3 | 71090453  | 71090708  | FOXP1 |
| chr3 | 71096067  | 71096271  | FOXP1 |
| chr3 | 71101662  | 71101802  | FOXP1 |
| chr3 | 71102761  | 71102949  | FOXP1 |
| chr3 | 71161661  | 71161813  | FOXP1 |
| chr3 | 71179623  | 71179859  | FOXP1 |
| chr3 | 71247029  | 71247244  | FOXP1 |
| chr3 | 71247327  | 71247557  | FOXP1 |
| chr3 | 89156873  | 89157011  | EPHA3 |
| chr3 | 89176333  | 89176448  | EPHA3 |
| chr3 | 89258984  | 89259695  | EPHA3 |
| chr3 | 89390040  | 89390246  | EPHA3 |
| chr3 | 89390879  | 89391265  | EPHA3 |
| chr3 | 89444961  | 89445136  | EPHA3 |
| chr3 | 89448442  | 89448681  | EPHA3 |
| chr3 | 89456393  | 89456546  | EPHA3 |
| chr3 | 89457191  | 89457306  | EPHA3 |
| chr3 | 89462265  | 89462441  | EPHA3 |
| chr3 | 89468329  | 89468565  | EPHA3 |
| chr3 | 89478230  | 89478342  | EPHA3 |
| chr3 | 89480274  | 89480534  | EPHA3 |
| chr3 | 89498349  | 89498549  | EPHA3 |
| chr3 | 89499301  | 89499545  | EPHA3 |
| chr3 | 89521588  | 89521794  | EPHA3 |
| chr3 | 89528521  | 89528677  | EPHA3 |
| chr3 | 96533442  | 96533877  | EPHA6 |
| chr3 | 96585643  | 96585758  | EPHA6 |
| chr3 | 96706148  | 96706862  | EPHA6 |
| chr3 | 96728822  | 96728898  | EPHA6 |
| chr3 | 96945082  | 96945288  | EPHA6 |
| chr3 | 96962770  | 96963194  | EPHA6 |
| chr3 | 97123968  | 97124143  | EPHA6 |
| chr3 | 97167386  | 97167599  | EPHA6 |
| chr3 | 97185237  | 97185351  | EPHA6 |
| chr3 | 97194170  | 97194329  | EPHA6 |
| chr3 | 97198112  | 97198233  | EPHA6 |
| chr3 | 97202752  | 97202928  | EPHA6 |
| chr3 | 97251176  | 97251412  | EPHA6 |
| chr3 | 97311430  | 97311606  | EPHA6 |
| chr3 | 97329611  | 97329723  | EPHA6 |
| chr3 | 97331196  | 97331300  | EPHA6 |
| chr3 | 97356691  | 97356951  | EPHA6 |
| chr3 | 97364937  | 97365179  | EPHA6 |
| chr3 | 97367104  | 97367199  | EPHA6 |
| chr3 | 97439079  | 97439279  | EPHA6 |
| chr3 | 97454743  | 97454987  | EPHA6 |
| chr3 | 97466241  | 97466441  | EPHA6 |
| chr3 | 97467405  | 97467570  | EPHA6 |
| chr3 | 119501579 | 119501724 | NR112 |
| chr3 | 119526050 | 119526319 | NR112 |
| chr3 | 119528882 | 119529066 | NR112 |
| chr3 | 119530360 | 119530598 | NR112 |
| chr3 | 119531507 | 119531832 | NR112 |
| chr3 | 119533800 | 119533993 | NR112 |
| chr3 | 119534144 | 119534311 | NR112 |
| chr3 | 119534547 | 119534703 | NR112 |
| chr3 | 119535889 | 119536084 | NR112 |
| chr3 | 128199836 | 128200186 | GATA2 |
| chr3 | 128200636 | 128200812 | GATA2 |
| chr3 | 128202677 | 128202873 | GATA2 |
| chr3 | 128204544 | 128205236 | GATA2 |

|      |           |           |                |
|------|-----------|-----------|----------------|
| chr3 | 128205620 | 128205899 | GATA2          |
| chr3 | 134514448 | 134514556 | EPHB1          |
| chr3 | 134644632 | 134644747 | EPHB1          |
| chr3 | 134670187 | 134670919 | EPHB1          |
| chr3 | 134825264 | 134825470 | EPHB1          |
| chr3 | 134851530 | 134851916 | EPHB1          |
| chr3 | 134872968 | 134873143 | EPHB1          |
| chr3 | 134880834 | 134881047 | EPHB1          |
| chr3 | 134884784 | 134884943 | EPHB1          |
| chr3 | 134885758 | 134885873 | EPHB1          |
| chr3 | 134898676 | 134898849 | EPHB1          |
| chr3 | 134911392 | 134911690 | EPHB1          |
| chr3 | 134920290 | 134920556 | EPHB1          |
| chr3 | 134959964 | 134960164 | EPHB1          |
| chr3 | 134967132 | 134967376 | EPHB1          |
| chr3 | 134968152 | 134968358 | EPHB1          |
| chr3 | 134977828 | 134977987 | EPHB1          |
| chr3 | 138664408 | 138665589 | FOXJ2          |
| chr3 | 142168245 | 142168469 | ATR            |
| chr3 | 142171944 | 142172100 | ATR            |
| chr3 | 142176420 | 142176622 | ATR            |
| chr3 | 142177774 | 142177978 | ATR            |
| chr3 | 142178043 | 142178250 | ATR            |
| chr3 | 142180756 | 142180957 | ATR            |
| chr3 | 142183913 | 142184107 | ATR            |
| chr3 | 142185140 | 142185400 | ATR            |
| chr3 | 142186750 | 142186935 | ATR            |
| chr3 | 142188153 | 142188436 | ATR            |
| chr3 | 142188902 | 142189050 | ATR            |
| chr3 | 142203956 | 142204149 | ATR            |
| chr3 | 142211948 | 142212178 | ATR            |
| chr3 | 142215177 | 142215387 | ATR            |
| chr3 | 142215829 | 142216059 | ATR            |
| chr3 | 142217413 | 142217641 | ATR            |
| chr3 | 142218443 | 142218585 | ATR            |
| chr3 | 142222178 | 142222320 | ATR            |
| chr3 | 142223955 | 142224170 | ATR            |
| chr3 | 142226747 | 142226976 | ATR            |
| chr3 | 142231076 | 142231337 | ATR            |
| chr3 | 142232317 | 142232505 | ATR            |
| chr3 | 142234211 | 142234382 | ATR            |
| chr3 | 142238485 | 142238651 | ATR            |
| chr3 | 142241544 | 142241708 | ATR            |
| chr3 | 142242809 | 142243066 | ATR            |
| chr3 | 142253896 | 142254072 | ATR            |
| chr3 | 142254924 | 142255068 | ATR            |
| chr3 | 142257298 | 142257492 | ATR            |
| chr3 | 142259720 | 142259901 | ATR            |
| chr3 | 142261481 | 142261624 | ATR            |
| chr3 | 142266541 | 142266777 | ATR            |
| chr3 | 142268295 | 142268540 | ATR            |
| chr3 | 142268948 | 142269169 | ATR            |
| chr3 | 142272043 | 142272265 | ATR            |
| chr3 | 142272456 | 142272607 | ATR            |
| chr3 | 142272641 | 142272882 | ATR            |
| chr3 | 142274693 | 142275006 | ATR            |
| chr3 | 142275199 | 142275442 | ATR            |
| chr3 | 142277440 | 142277643 | ATR            |
| chr3 | 142278067 | 142278308 | ATR            |
| chr3 | 142279079 | 142279321 | ATR            |
| chr3 | 142280059 | 142280288 | ATR            |
| chr3 | 142281048 | 142281976 | ATR            |
| chr3 | 142284937 | 142285128 | ATR            |
| chr3 | 142286879 | 142287021 | ATR            |
| chr3 | 142297462 | 142297571 | ATR            |
| chr3 | 151055579 | 151056658 | MED12L, P2RY12 |
| chr3 | 152553546 | 152554718 | P2RY1          |
| chr3 | 178916588 | 178916990 | PIK3CA         |
| chr3 | 178917452 | 178917712 | PIK3CA         |
| chr3 | 178919052 | 178919353 | PIK3CA         |
| chr3 | 178921306 | 178921602 | PIK3CA         |
| chr3 | 178922265 | 178922401 | PIK3CA         |
| chr3 | 178927357 | 178927513 | PIK3CA         |
| chr3 | 178927948 | 178928151 | PIK3CA         |
| chr3 | 178928193 | 178928378 | PIK3CA         |
| chr3 | 178935972 | 178936147 | PIK3CA         |
| chr3 | 178936958 | 178937090 | PIK3CA         |
| chr3 | 178937333 | 178937548 | PIK3CA         |
| chr3 | 178937711 | 178937865 | PIK3CA         |
| chr3 | 178938748 | 178938970 | PIK3CA         |
| chr3 | 178941843 | 178942000 | PIK3CA         |
| chr3 | 178942462 | 178942634 | PIK3CA         |
| chr3 | 178943724 | 178943853 | PIK3CA         |
| chr3 | 178947034 | 178947255 | PIK3CA         |
| chr3 | 178947766 | 178947934 | PIK3CA         |
| chr3 | 178947987 | 178948189 | PIK3CA         |
| chr3 | 178951856 | 178952177 | PIK3CA         |
| chr3 | 181430123 | 181431127 | SOX2           |
| chr3 | 187440220 | 187440414 | BCL6           |
| chr3 | 187442703 | 187442891 | BCL6           |
| chr3 | 187443261 | 187443442 | BCL6           |
| chr3 | 187444493 | 187444711 | BCL6           |
| chr3 | 187446122 | 187446357 | BCL6           |
| chr3 | 187446812 | 187447834 | BCL6           |
| chr3 | 187449471 | 187449743 | BCL6           |
| chr3 | 187451295 | 187451506 | BCL6           |

|      |          |          |                |
|------|----------|----------|----------------|
| chr4 | 1795636  | 1795795  | FGFR3          |
| chr4 | 1800955  | 1801275  | FGFR3          |
| chr4 | 1801448  | 1801564  | FGFR3          |
| chr4 | 1803068  | 1803288  | FGFR3          |
| chr4 | 1803321  | 1803495  | FGFR3          |
| chr4 | 1803536  | 1803777  | FGFR3          |
| chr4 | 1804615  | 1804816  | FGFR3          |
| chr4 | 1805393  | 1805588  | FGFR3          |
| chr4 | 1806031  | 1806272  | FGFR3          |
| chr4 | 1806522  | 1806721  | FGFR3          |
| chr4 | 1807056  | 1807228  | FGFR3          |
| chr4 | 1807260  | 1807421  | FGFR3          |
| chr4 | 1807451  | 1807692  | FGFR3          |
| chr4 | 1807752  | 1807925  | FGFR3          |
| chr4 | 1807958  | 1808079  | FGFR3          |
| chr4 | 1808247  | 1808435  | FGFR3          |
| chr4 | 1808530  | 1808686  | FGFR3          |
| chr4 | 1808817  | 1809439  | FGFR3          |
| chr4 | 15780012 | 15780295 | CD38           |
| chr4 | 15818108 | 15818288 | CD38           |
| chr4 | 15818318 | 15818374 | CD38           |
| chr4 | 15826478 | 15826664 | CD38           |
| chr4 | 15835814 | 15835950 | CD38           |
| chr4 | 15839689 | 15839813 | CD38           |
| chr4 | 15841623 | 15841766 | CD38           |
| chr4 | 15842049 | 15842186 | CD38           |
| chr4 | 15850136 | 15850250 | CD38           |
| chr4 | 55124910 | 55125009 | FIP1L1, PDGFRA |
| chr4 | 55127236 | 55127604 | FIP1L1, PDGFRA |
| chr4 | 55129808 | 55130148 | FIP1L1, PDGFRA |
| chr4 | 55131060 | 55131241 | FIP1L1, PDGFRA |
| chr4 | 55133430 | 55133652 | FIP1L1, PDGFRA |
| chr4 | 55133693 | 55133933 | FIP1L1, PDGFRA |
| chr4 | 55136774 | 55136940 | FIP1L1, PDGFRA |
| chr4 | 55138535 | 55138712 | FIP1L1, PDGFRA |
| chr4 | 55139678 | 55139922 | FIP1L1, PDGFRA |
| chr4 | 55140672 | 55140817 | FIP1L1, PDGFRA |
| chr4 | 55140982 | 55141165 | FIP1L1, PDGFRA |
| chr4 | 55143529 | 55143684 | FIP1L1, PDGFRA |
| chr4 | 55144037 | 55144198 | FIP1L1, PDGFRA |
| chr4 | 55144503 | 55144707 | FIP1L1, PDGFRA |
| chr4 | 55146457 | 55146674 | FIP1L1, PDGFRA |
| chr4 | 55151512 | 55151678 | FIP1L1, PDGFRA |
| chr4 | 55151982 | 55152155 | FIP1L1, PDGFRA |
| chr4 | 55153571 | 55153733 | FIP1L1, PDGFRA |
| chr4 | 55154940 | 55155090 | FIP1L1, PDGFRA |
| chr4 | 55155150 | 55155306 | FIP1L1, PDGFRA |
| chr4 | 55156454 | 55156746 | FIP1L1, PDGFRA |
| chr4 | 55161266 | 55161464 | FIP1L1, PDGFRA |
| chr4 | 55524156 | 55524273 | KIT            |
| chr4 | 55561652 | 55561972 | KIT            |
| chr4 | 55564424 | 55564756 | KIT            |
| chr4 | 55565770 | 55565957 | KIT            |
| chr4 | 55569864 | 55570083 | KIT            |
| chr4 | 55573238 | 55573478 | KIT            |
| chr4 | 55575564 | 55575778 | KIT            |
| chr4 | 55589724 | 55589889 | KIT            |
| chr4 | 55591997 | 55592241 | KIT            |
| chr4 | 55593358 | 55593515 | KIT            |
| chr4 | 55593556 | 55593733 | KIT            |
| chr4 | 55593963 | 55594118 | KIT            |
| chr4 | 55594151 | 55594312 | KIT            |
| chr4 | 55595475 | 55595676 | KIT            |
| chr4 | 55597468 | 55597610 | KIT            |
| chr4 | 55598011 | 55598189 | KIT            |
| chr4 | 55599210 | 55599383 | KIT            |
| chr4 | 55602638 | 55602800 | KIT            |
| chr4 | 55602861 | 55603011 | KIT            |
| chr4 | 55603315 | 55603471 | KIT            |
| chr4 | 55604569 | 55604748 | KIT            |
| chr4 | 55946082 | 55946355 | KDR            |
| chr4 | 55948097 | 55948233 | KDR            |
| chr4 | 55948677 | 55948827 | KDR            |
| chr4 | 55953748 | 55953950 | KDR            |
| chr4 | 55955009 | 55955165 | KDR            |
| chr4 | 55955515 | 55955665 | KDR            |
| chr4 | 55955832 | 55955994 | KDR            |
| chr4 | 55956097 | 55956270 | KDR            |
| chr4 | 55958758 | 55958906 | KDR            |
| chr4 | 55960943 | 55961147 | KDR            |
| chr4 | 55961718 | 55961857 | KDR            |
| chr4 | 55962370 | 55962534 | KDR            |
| chr4 | 55963803 | 55963958 | KDR            |
| chr4 | 55964278 | 55964464 | KDR            |
| chr4 | 55964838 | 55964995 | KDR            |
| chr4 | 55968038 | 55968220 | KDR            |
| chr4 | 55968503 | 55968700 | KDR            |
| chr4 | 55970784 | 55971176 | KDR            |
| chr4 | 55971973 | 55972132 | KDR            |
| chr4 | 55972828 | 55973002 | KDR            |
| chr4 | 55973878 | 55974085 | KDR            |
| chr4 | 55976544 | 55976758 | KDR            |
| chr4 | 55976795 | 55976960 | KDR            |
| chr4 | 55979445 | 55979673 | KDR            |
| chr4 | 55980267 | 55980457 | KDR            |
| chr4 | 55981015 | 55981234 | KDR            |

|      |           |           |       |
|------|-----------|-----------|-------|
| chr4 | 55981422  | 55981603  | KDR   |
| chr4 | 55984745  | 55984992  | KDR   |
| chr4 | 55987238  | 55987382  | KDR   |
| chr4 | 55991368  | 55991485  | KDR   |
| chr4 | 66189806  | 66189962  | EPHA5 |
| chr4 | 66197661  | 66197871  | EPHA5 |
| chr4 | 66201624  | 66201868  | EPHA5 |
| chr4 | 66213746  | 66213946  | EPHA5 |
| chr4 | 66217081  | 66217341  | EPHA5 |
| chr4 | 66218734  | 66218846  | EPHA5 |
| chr4 | 66230709  | 66230945  | EPHA5 |
| chr4 | 66231624  | 66231800  | EPHA5 |
| chr4 | 66233049  | 66233167  | EPHA5 |
| chr4 | 66242690  | 66242806  | EPHA5 |
| chr4 | 66270066  | 66270222  | EPHA5 |
| chr4 | 66279976  | 66280186  | EPHA5 |
| chr4 | 66286133  | 66286308  | EPHA5 |
| chr4 | 66356069  | 66356455  | EPHA5 |
| chr4 | 66361080  | 66361286  | EPHA5 |
| chr4 | 66467333  | 66468047  | EPHA5 |
| chr4 | 66509055  | 66509170  | EPHA5 |
| chr4 | 66535254  | 66535485  | EPHA5 |
| chr4 | 100197755 | 100197830 | ADH1A |
| chr4 | 100200557 | 100200746 | ADH1A |
| chr4 | 100201275 | 100201461 | ADH1A |
| chr4 | 100203477 | 100203788 | ADH1A |
| chr4 | 100205530 | 100205800 | ADH1A |
| chr4 | 100205847 | 100205985 | ADH1A |
| chr4 | 100207981 | 100208170 | ADH1A |
| chr4 | 100208695 | 100208847 | ADH1A |
| chr4 | 100212028 | 100212096 | ADH1A |
| chr4 | 100228971 | 100229046 | ADH1B |
| chr4 | 100231896 | 100232085 | ADH1B |
| chr4 | 100232652 | 100232838 | ADH1B |
| chr4 | 100234952 | 100235263 | ADH1B |
| chr4 | 100237029 | 100237299 | ADH1B |
| chr4 | 100237346 | 100237484 | ADH1B |
| chr4 | 100239177 | 100239366 | ADH1B |
| chr4 | 100239916 | 100240068 | ADH1B |
| chr4 | 100242445 | 100242513 | ADH1B |
| chr4 | 100257883 | 100257958 | ADH1C |
| chr4 | 100260708 | 100260897 | ADH1C |
| chr4 | 100261706 | 100261892 | ADH1C |
| chr4 | 100263926 | 100264237 | ADH1C |
| chr4 | 100265993 | 100266263 | ADH1C |
| chr4 | 100266310 | 100266448 | ADH1C |
| chr4 | 100268137 | 100268326 | ADH1C |
| chr4 | 100268876 | 100269028 | ADH1C |
| chr4 | 100273789 | 100273857 | ADH1C |
| chr4 | 106111601 | 106111668 | TET2  |
| chr4 | 106155028 | 106158622 | TET2  |
| chr4 | 106162470 | 106162615 | TET2  |
| chr4 | 106163965 | 106164109 | TET2  |
| chr4 | 106164701 | 106164960 | TET2  |
| chr4 | 106180750 | 106180951 | TET2  |
| chr4 | 106182890 | 106183030 | TET2  |
| chr4 | 106190741 | 106190929 | TET2  |
| chr4 | 106193695 | 106194100 | TET2  |
| chr4 | 106196179 | 106197701 | TET2  |
| chr4 | 153244007 | 153244326 | FBXW7 |
| chr4 | 153245310 | 153245571 | FBXW7 |
| chr4 | 153247132 | 153247408 | FBXW7 |
| chr4 | 153249334 | 153249566 | FBXW7 |
| chr4 | 153250798 | 153250962 | FBXW7 |
| chr4 | 153251858 | 153252045 | FBXW7 |
| chr4 | 153253722 | 153253896 | FBXW7 |
| chr4 | 153258928 | 153259113 | FBXW7 |
| chr4 | 153268056 | 153268248 | FBXW7 |
| chr4 | 153269800 | 153269906 | FBXW7 |
| chr4 | 153271168 | 153271301 | FBXW7 |
| chr4 | 153273596 | 153273907 | FBXW7 |
| chr4 | 153303315 | 153303512 | FBXW7 |
| chr4 | 153332399 | 153332980 | FBXW7 |
| chr5 | 1253817   | 1253971   | TERT  |
| chr5 | 1254457   | 1254645   | TERT  |
| chr5 | 1255376   | 1255551   | TERT  |
| chr5 | 1258687   | 1258799   | TERT  |
| chr5 | 1260563   | 1260740   | TERT  |
| chr5 | 1264493   | 1264732   | TERT  |
| chr5 | 1266553   | 1266675   | TERT  |
| chr5 | 1268609   | 1268773   | TERT  |
| chr5 | 1271208   | 1271344   | TERT  |
| chr5 | 1272274   | 1272420   | TERT  |
| chr5 | 1278730   | 1278936   | TERT  |
| chr5 | 1279380   | 1279610   | TERT  |
| chr5 | 1280247   | 1280478   | TERT  |
| chr5 | 1282518   | 1282764   | TERT  |
| chr5 | 1293402   | 1294806   | TERT  |
| chr5 | 1294860   | 1295129   | TERT  |
| chr5 | 35857054  | 35857186  | IL7R  |
| chr5 | 35860928  | 35861117  | IL7R  |
| chr5 | 35867382  | 35867664  | IL7R  |
| chr5 | 35871132  | 35871340  | IL7R  |
| chr5 | 35873556  | 35873775  | IL7R  |
| chr5 | 35874525  | 35874669  | IL7R  |
| chr5 | 35875588  | 35875718  | IL7R  |

|      |          |          |        |
|------|----------|----------|--------|
| chr5 | 35876059 | 35876613 | IL7R   |
| chr5 | 38942380 | 38942505 | RICTOR |
| chr5 | 38942909 | 38943098 | RICTOR |
| chr5 | 38944522 | 38944696 | RICTOR |
| chr5 | 38944989 | 38945195 | RICTOR |
| chr5 | 38945567 | 38945851 | RICTOR |
| chr5 | 38946544 | 38946679 | RICTOR |
| chr5 | 38947340 | 38947568 | RICTOR |
| chr5 | 38949432 | 38949554 | RICTOR |
| chr5 | 38949788 | 38950847 | RICTOR |
| chr5 | 38952272 | 38952552 | RICTOR |
| chr5 | 38953061 | 38953218 | RICTOR |
| chr5 | 38953537 | 38953680 | RICTOR |
| chr5 | 38954850 | 38954988 | RICTOR |
| chr5 | 38955671 | 38955831 | RICTOR |
| chr5 | 38957728 | 38957857 | RICTOR |
| chr5 | 38958519 | 38958646 | RICTOR |
| chr5 | 38958743 | 38958958 | RICTOR |
| chr5 | 38959271 | 38959448 | RICTOR |
| chr5 | 38959855 | 38960105 | RICTOR |
| chr5 | 38960474 | 38960660 | RICTOR |
| chr5 | 38962391 | 38962488 | RICTOR |
| chr5 | 38962561 | 38962713 | RICTOR |
| chr5 | 38962952 | 38963168 | RICTOR |
| chr5 | 38964868 | 38965019 | RICTOR |
| chr5 | 38966717 | 38966848 | RICTOR |
| chr5 | 38967237 | 38967354 | RICTOR |
| chr5 | 38967413 | 38967554 | RICTOR |
| chr5 | 38968019 | 38968157 | RICTOR |
| chr5 | 38971953 | 38972086 | RICTOR |
| chr5 | 38975613 | 38975731 | RICTOR |
| chr5 | 38978659 | 38978777 | RICTOR |
| chr5 | 38981943 | 38982163 | RICTOR |
| chr5 | 38991025 | 38991202 | RICTOR |
| chr5 | 38996895 | 38997009 | RICTOR |
| chr5 | 39002611 | 39002793 | RICTOR |
| chr5 | 39003634 | 39003749 | RICTOR |
| chr5 | 39021115 | 39021263 | RICTOR |
| chr5 | 39074187 | 39074285 | RICTOR |
| chr5 | 39074405 | 39074504 | RICTOR |
| chr5 | 56111375 | 56111907 | MAP3K1 |
| chr5 | 56152401 | 56152602 | MAP3K1 |
| chr5 | 56155516 | 56155767 | MAP3K1 |
| chr5 | 56160535 | 56160786 | MAP3K1 |
| chr5 | 56161141 | 56161308 | MAP3K1 |
| chr5 | 56161630 | 56161829 | MAP3K1 |
| chr5 | 56167711 | 56167883 | MAP3K1 |
| chr5 | 56168442 | 56168574 | MAP3K1 |
| chr5 | 56168626 | 56168857 | MAP3K1 |
| chr5 | 56170833 | 56171162 | MAP3K1 |
| chr5 | 56174781 | 56174953 | MAP3K1 |
| chr5 | 56176512 | 56176654 | MAP3K1 |
| chr5 | 56176884 | 56177124 | MAP3K1 |
| chr5 | 56177371 | 56178718 | MAP3K1 |
| chr5 | 56179328 | 56179531 | MAP3K1 |
| chr5 | 56180465 | 56180678 | MAP3K1 |
| chr5 | 56181733 | 56181915 | MAP3K1 |
| chr5 | 56183179 | 56183372 | MAP3K1 |
| chr5 | 56184027 | 56184209 | MAP3K1 |
| chr5 | 56189332 | 56189532 | MAP3K1 |
| chr5 | 67522478 | 67522862 | PIK3R1 |
| chr5 | 67569192 | 67569335 | PIK3R1 |
| chr5 | 67569741 | 67569866 | PIK3R1 |
| chr5 | 67575404 | 67575586 | PIK3R1 |
| chr5 | 67576330 | 67576582 | PIK3R1 |
| chr5 | 67576729 | 67576859 | PIK3R1 |
| chr5 | 67584538 | 67584604 | PIK3R1 |
| chr5 | 67586531 | 67586687 | PIK3R1 |
| chr5 | 67588061 | 67588214 | PIK3R1 |
| chr5 | 67588903 | 67589052 | PIK3R1 |
| chr5 | 67589105 | 67589336 | PIK3R1 |
| chr5 | 67589511 | 67589687 | PIK3R1 |
| chr5 | 67590338 | 67590531 | PIK3R1 |
| chr5 | 67590950 | 67591177 | PIK3R1 |
| chr5 | 67591222 | 67591341 | PIK3R1 |
| chr5 | 67591949 | 67592194 | PIK3R1 |
| chr5 | 67593214 | 67593454 | PIK3R1 |
| chr5 | 74638405 | 74638620 | HMGCR  |
| chr5 | 74638663 | 74638715 | HMGCR  |
| chr5 | 74639652 | 74639814 | HMGCR  |
| chr5 | 74640044 | 74640182 | HMGCR  |
| chr5 | 74641373 | 74641508 | HMGCR  |
| chr5 | 74643003 | 74643159 | HMGCR  |
| chr5 | 74645841 | 74645998 | HMGCR  |
| chr5 | 74646057 | 74646224 | HMGCR  |
| chr5 | 74646588 | 74646799 | HMGCR  |
| chr5 | 74646867 | 74647165 | HMGCR  |
| chr5 | 74647223 | 74647452 | HMGCR  |
| chr5 | 74650302 | 74650547 | HMGCR  |
| chr5 | 74650855 | 74651064 | HMGCR  |
| chr5 | 74651164 | 74651372 | HMGCR  |
| chr5 | 74652142 | 74652298 | HMGCR  |
| chr5 | 74654456 | 74654677 | HMGCR  |
| chr5 | 74654969 | 74655160 | HMGCR  |
| chr5 | 74655197 | 74655406 | HMGCR  |
| chr5 | 74655784 | 74655989 | HMGCR  |

|      |           |           |        |
|------|-----------|-----------|--------|
| chr5 | 74656087  | 74656192  | HMGCR  |
| chr5 | 112043389 | 112043604 | APC    |
| chr5 | 112090562 | 112090747 | APC    |
| chr5 | 112101997 | 112102132 | APC    |
| chr5 | 112102860 | 112103112 | APC    |
| chr5 | 112111300 | 112111459 | APC    |
| chr5 | 112116461 | 112116625 | APC    |
| chr5 | 112128117 | 112128251 | APC    |
| chr5 | 112136950 | 112137105 | APC    |
| chr5 | 112151166 | 112151315 | APC    |
| chr5 | 112154637 | 112155066 | APC    |
| chr5 | 112157567 | 112157713 | APC    |
| chr5 | 112162779 | 112162969 | APC    |
| chr5 | 112163600 | 112163728 | APC    |
| chr5 | 112164527 | 112164694 | APC    |
| chr5 | 112170622 | 112170887 | APC    |
| chr5 | 112173224 | 112179848 | APC    |
| chr5 | 138117588 | 138117743 | CTNNA1 |
| chr5 | 138118840 | 138119086 | CTNNA1 |
| chr5 | 138145701 | 138145918 | CTNNA1 |
| chr5 | 138147846 | 138148016 | CTNNA1 |
| chr5 | 138160193 | 138160513 | CTNNA1 |
| chr5 | 138163178 | 138163432 | CTNNA1 |
| chr5 | 138221875 | 138222006 | CTNNA1 |
| chr5 | 138223153 | 138223356 | CTNNA1 |
| chr5 | 138240012 | 138240155 | CTNNA1 |
| chr5 | 138253405 | 138253612 | CTNNA1 |
| chr5 | 138260173 | 138260424 | CTNNA1 |
| chr5 | 138260919 | 138261121 | CTNNA1 |
| chr5 | 138264909 | 138265070 | CTNNA1 |
| chr5 | 138266136 | 138266368 | CTNNA1 |
| chr5 | 138266493 | 138266649 | CTNNA1 |
| chr5 | 138268241 | 138268426 | CTNNA1 |
| chr5 | 138268551 | 138268672 | CTNNA1 |
| chr5 | 138269465 | 138269803 | CTNNA1 |
| chr5 | 148206369 | 148207661 | ADRB2  |
| chr5 | 149433606 | 149433818 | CSF1R  |
| chr5 | 149433859 | 149434018 | CSF1R  |
| chr5 | 149434774 | 149434924 | CSF1R  |
| chr5 | 149435563 | 149435725 | CSF1R  |
| chr5 | 149435756 | 149435929 | CSF1R  |
| chr5 | 149436824 | 149436972 | CSF1R  |
| chr5 | 149437041 | 149437180 | CSF1R  |
| chr5 | 149439237 | 149439450 | CSF1R  |
| chr5 | 149440399 | 149440560 | CSF1R  |
| chr5 | 149441028 | 149441183 | CSF1R  |
| chr5 | 149441260 | 149441437 | CSF1R  |
| chr5 | 149447752 | 149447918 | CSF1R  |
| chr5 | 149449410 | 149449651 | CSF1R  |
| chr5 | 149449719 | 149449890 | CSF1R  |
| chr5 | 149449993 | 149450159 | CSF1R  |
| chr5 | 149452838 | 149453081 | CSF1R  |
| chr5 | 149456813 | 149457023 | CSF1R  |
| chr5 | 149457649 | 149457836 | CSF1R  |
| chr5 | 149459589 | 149459924 | CSF1R  |
| chr5 | 149460304 | 149460612 | CSF1R  |
| chr5 | 149465916 | 149466015 | CSF1R  |
| chr5 | 149495300 | 149495534 | PDGFRB |
| chr5 | 149497155 | 149497438 | PDGFRB |
| chr5 | 149498284 | 149498440 | PDGFRB |
| chr5 | 149499004 | 149499154 | PDGFRB |
| chr5 | 149499549 | 149499711 | PDGFRB |
| chr5 | 149500425 | 149500598 | PDGFRB |
| chr5 | 149500741 | 149500910 | PDGFRB |
| chr5 | 149501417 | 149501628 | PDGFRB |
| chr5 | 149502579 | 149502789 | PDGFRB |
| chr5 | 149503787 | 149503948 | PDGFRB |
| chr5 | 149504264 | 149504419 | PDGFRB |
| chr5 | 149504982 | 149505165 | PDGFRB |
| chr5 | 149506057 | 149506202 | PDGFRB |
| chr5 | 149509294 | 149509556 | PDGFRB |
| chr5 | 149510076 | 149510250 | PDGFRB |
| chr5 | 149511516 | 149511682 | PDGFRB |
| chr5 | 149512287 | 149512530 | PDGFRB |
| chr5 | 149513123 | 149513348 | PDGFRB |
| chr5 | 149513418 | 149513596 | PDGFRB |
| chr5 | 149514287 | 149514604 | PDGFRB |
| chr5 | 149515092 | 149515466 | PDGFRB |
| chr5 | 149516545 | 149516635 | PDGFRB |
| chr5 | 161112970 | 161113058 | GABRA6 |
| chr5 | 161113210 | 161113379 | GABRA6 |
| chr5 | 161113916 | 161114034 | GABRA6 |
| chr5 | 161115929 | 161116200 | GABRA6 |
| chr5 | 161116234 | 161116367 | GABRA6 |
| chr5 | 161116616 | 161116810 | GABRA6 |
| chr5 | 161117181 | 161117384 | GABRA6 |
| chr5 | 161118921 | 161119231 | GABRA6 |
| chr5 | 161128478 | 161128804 | GABRA6 |
| chr5 | 170814927 | 170815035 | NPM1   |
| chr5 | 170817029 | 170817159 | NPM1   |
| chr5 | 170818283 | 170818453 | NPM1   |
| chr5 | 170818684 | 170818828 | NPM1   |
| chr5 | 170819688 | 170819845 | NPM1   |
| chr5 | 170819892 | 170820007 | NPM1   |
| chr5 | 170827131 | 170827239 | NPM1   |
| chr5 | 170827817 | 170827954 | NPM1   |



|      |           |           |               |
|------|-----------|-----------|---------------|
| chr5 | 170832280 | 170832432 | NPM1          |
| chr5 | 170833375 | 170833434 | NPM1          |
| chr5 | 170834678 | 170834803 | NPM1          |
| chr5 | 170837505 | 170837594 | NPM1          |
| chr5 | 176516578 | 176516719 | FGFR4         |
| chr5 | 176517044 | 176517679 | FGFR4         |
| chr5 | 176517720 | 176518130 | FGFR4         |
| chr5 | 176518660 | 176518834 | FGFR4         |
| chr5 | 176519296 | 176519537 | FGFR4         |
| chr5 | 176519621 | 176520577 | FGFR4         |
| chr5 | 176520629 | 176520801 | FGFR4         |
| chr5 | 176522305 | 176522466 | FGFR4         |
| chr5 | 176522508 | 176522749 | FGFR4         |
| chr5 | 176523032 | 176523205 | FGFR4         |
| chr5 | 176523262 | 176523383 | FGFR4         |
| chr5 | 176523579 | 176523767 | FGFR4         |
| chr5 | 176524267 | 176524423 | FGFR4         |
| chr5 | 176524502 | 176524702 | FGFR4         |
| chr5 | 176562079 | 176563056 | NSD1          |
| chr5 | 176563848 | 176563982 | NSD1          |
| chr5 | 176618859 | 176619045 | NSD1          |
| chr5 | 176631095 | 176631318 | NSD1          |
| chr5 | 176636611 | 176639221 | NSD1          |
| chr5 | 176647993 | 176648051 | NSD1          |
| chr5 | 176662796 | 176662971 | NSD1          |
| chr5 | 176665212 | 176665533 | NSD1          |
| chr5 | 176666731 | 176666891 | NSD1          |
| chr5 | 176671170 | 176671296 | NSD1          |
| chr5 | 176673653 | 176673822 | NSD1          |
| chr5 | 176675156 | 176675350 | NSD1          |
| chr5 | 176678705 | 176678879 | NSD1          |
| chr5 | 176683926 | 176684177 | NSD1          |
| chr5 | 176686964 | 176687194 | NSD1          |
| chr5 | 176694537 | 176694744 | NSD1          |
| chr5 | 176696577 | 176696833 | NSD1          |
| chr5 | 176700647 | 176700810 | NSD1          |
| chr5 | 176707540 | 176707860 | NSD1          |
| chr5 | 176709440 | 176709607 | NSD1          |
| chr5 | 176710762 | 176710954 | NSD1          |
| chr5 | 176715794 | 176715951 | NSD1          |
| chr5 | 176718929 | 176719184 | NSD1          |
| chr5 | 176720807 | 176722485 | NSD1          |
| chr5 | 180030166 | 180030415 | FLT4          |
| chr5 | 180035106 | 180035184 | FLT4          |
| chr5 | 180035255 | 180035309 | FLT4          |
| chr5 | 180035942 | 180036078 | FLT4          |
| chr5 | 180036879 | 180037050 | FLT4          |
| chr5 | 180038305 | 180038504 | FLT4          |
| chr5 | 180039480 | 180039636 | FLT4          |
| chr5 | 180039985 | 180040135 | FLT4          |
| chr5 | 180041042 | 180041204 | FLT4          |
| chr5 | 180043341 | 180043514 | FLT4          |
| chr5 | 180043874 | 180044019 | FLT4          |
| chr5 | 180045744 | 180045945 | FLT4          |
| chr5 | 180045995 | 180046134 | FLT4          |
| chr5 | 180046227 | 180046391 | FLT4          |
| chr5 | 180046428 | 180046794 | FLT4          |
| chr5 | 180047147 | 180047333 | FLT4          |
| chr5 | 180047583 | 180047740 | FLT4          |
| chr5 | 180047850 | 180048032 | FLT4          |
| chr5 | 180048080 | 180048277 | FLT4          |
| chr5 | 180048516 | 180048929 | FLT4          |
| chr5 | 180049705 | 180049864 | FLT4          |
| chr5 | 180050909 | 180051086 | FLT4          |
| chr5 | 180052843 | 180053056 | FLT4          |
| chr5 | 180053085 | 180053290 | FLT4          |
| chr5 | 180055856 | 180056024 | FLT4          |
| chr5 | 180056233 | 180056452 | FLT4          |
| chr5 | 180056670 | 180056860 | FLT4          |
| chr5 | 180056917 | 180057130 | FLT4          |
| chr5 | 180057199 | 180057362 | FLT4          |
| chr5 | 180057529 | 180057824 | FLT4          |
| chr5 | 180058656 | 180058803 | FLT4          |
| chr5 | 180076462 | 180076570 | FLT4          |
| chr6 | 18130873  | 18131036  | TPMT          |
| chr6 | 18132338  | 18132433  | TPMT          |
| chr6 | 18134009  | 18134145  | TPMT          |
| chr6 | 18139168  | 18139293  | TPMT          |
| chr6 | 18139870  | 18139973  | TPMT          |
| chr6 | 18143801  | 18143984  | TPMT          |
| chr6 | 18148028  | 18148171  | TPMT          |
| chr6 | 18149193  | 18149383  | TPMT          |
| chr6 | 32163188  | 32163952  | GPSM3, NOTCH4 |
| chr6 | 32164075  | 32164223  | NOTCH4        |
| chr6 | 32164676  | 32164874  | NOTCH4        |
| chr6 | 32165050  | 32165396  | NOTCH4        |
| chr6 | 32166172  | 32166361  | NOTCH4        |
| chr6 | 32166400  | 32166532  | NOTCH4        |
| chr6 | 32166677  | 32166947  | NOTCH4        |
| chr6 | 32168582  | 32168808  | NOTCH4        |
| chr6 | 32168868  | 32169302  | NOTCH4        |
| chr6 | 32169827  | 32170401  | NOTCH4        |
| chr6 | 32171521  | 32171684  | NOTCH4        |
| chr6 | 32171888  | 32172191  | NOTCH4        |
| chr6 | 32178503  | 32178738  | NOTCH4        |
| chr6 | 32180225  | 32180429  | NOTCH4        |

|      |          |          |                |
|------|----------|----------|----------------|
| chr6 | 32180575 | 32180713 | NOTCH4         |
| chr6 | 32180886 | 32181054 | NOTCH4         |
| chr6 | 32181439 | 32181642 | NOTCH4         |
| chr6 | 32181861 | 32182057 | NOTCH4         |
| chr6 | 32182977 | 32183187 | NOTCH4         |
| chr6 | 32184696 | 32184869 | NOTCH4         |
| chr6 | 32184904 | 32185068 | NOTCH4         |
| chr6 | 32185746 | 32185910 | NOTCH4         |
| chr6 | 32187343 | 32187588 | NOTCH4         |
| chr6 | 32187880 | 32188086 | NOTCH4         |
| chr6 | 32188156 | 32188443 | NOTCH4         |
| chr6 | 32188507 | 32188680 | NOTCH4         |
| chr6 | 32188729 | 32189127 | NOTCH4         |
| chr6 | 32190262 | 32190608 | NOTCH4         |
| chr6 | 32190756 | 32190888 | NOTCH4         |
| chr6 | 32191607 | 32191730 | NOTCH4         |
| chr6 | 33259798 | 33260115 | PFDN6, RGL2    |
| chr6 | 33260181 | 33260346 | PFDN6, RGL2    |
| chr6 | 33260767 | 33261108 | PFDN6, RGL2    |
| chr6 | 33261164 | 33261326 | PFDN6, RGL2    |
| chr6 | 33261355 | 33261501 | PFDN6, RGL2    |
| chr6 | 33261542 | 33261868 | PFDN6, RGL2    |
| chr6 | 33262439 | 33262564 | PFDN6, RGL2    |
| chr6 | 33262728 | 33262847 | PFDN6, RGL2    |
| chr6 | 33262878 | 33263013 | PFDN6, RGL2    |
| chr6 | 33263070 | 33263224 | PFDN6, RGL2    |
| chr6 | 33263259 | 33263561 | PFDN6, RGL2    |
| chr6 | 33263779 | 33264127 | PFDN6, RGL2    |
| chr6 | 33264165 | 33264266 | PFDN6, RGL2    |
| chr6 | 33264349 | 33264578 | PFDN6, RGL2    |
| chr6 | 33264783 | 33264917 | PFDN6, RGL2    |
| chr6 | 33266206 | 33266412 | RGL2           |
| chr6 | 33286494 | 33286604 | DAXX           |
| chr6 | 33286748 | 33287021 | DAXX           |
| chr6 | 33287131 | 33287656 | DAXX           |
| chr6 | 33287762 | 33288026 | DAXX           |
| chr6 | 33288131 | 33288393 | DAXX           |
| chr6 | 33288487 | 33289369 | DAXX           |
| chr6 | 33289470 | 33289727 | DAXX           |
| chr6 | 33290613 | 33290716 | DAXX           |
| chr6 | 35420297 | 35420595 | FANCE          |
| chr6 | 35423498 | 35424155 | FANCE          |
| chr6 | 35425307 | 35425402 | FANCE          |
| chr6 | 35425667 | 35425786 | FANCE          |
| chr6 | 35426048 | 35426242 | FANCE          |
| chr6 | 35427082 | 35427256 | FANCE          |
| chr6 | 35427433 | 35427562 | FANCE          |
| chr6 | 35428303 | 35428420 | FANCE          |
| chr6 | 35430540 | 35430716 | FANCE          |
| chr6 | 35433995 | 35434147 | FANCE          |
| chr6 | 36645588 | 36645735 | CDKN1A         |
| chr6 | 36651848 | 36652348 | CDKN1A         |
| chr6 | 36653502 | 36653602 | CDKN1A         |
| chr6 | 41533473 | 41533727 | FOXP4          |
| chr6 | 41545698 | 41545844 | FOXP4          |
| chr6 | 41552481 | 41552654 | FOXP4          |
| chr6 | 41553143 | 41553280 | FOXP4          |
| chr6 | 41554721 | 41554919 | FOXP4          |
| chr6 | 41555011 | 41555275 | FOXP4          |
| chr6 | 41555505 | 41555660 | FOXP4          |
| chr6 | 41556356 | 41556494 | FOXP4          |
| chr6 | 41557483 | 41557617 | FOXP4          |
| chr6 | 41557675 | 41557933 | FOXP4          |
| chr6 | 41557983 | 41558110 | FOXP4          |
| chr6 | 41558933 | 41559085 | FOXP4          |
| chr6 | 41562582 | 41562754 | FOXP4          |
| chr6 | 41564888 | 41565005 | FOXP4          |
| chr6 | 41565493 | 41565713 | FOXP4          |
| chr6 | 41566501 | 41566699 | FOXP4, MIR4641 |
| chr6 | 41903563 | 41903870 | CCND3          |
| chr6 | 41904271 | 41904458 | CCND3          |
| chr6 | 41904947 | 41905157 | CCND3          |
| chr6 | 41908082 | 41908348 | CCND3          |
| chr6 | 41908664 | 41908762 | CCND3          |
| chr6 | 41909164 | 41909412 | CCND3          |
| chr6 | 43738418 | 43739074 | VEGFA          |
| chr6 | 43742052 | 43742154 | VEGFA          |
| chr6 | 43745180 | 43745427 | VEGFA          |
| chr6 | 43746171 | 43746298 | VEGFA          |
| chr6 | 43746600 | 43746680 | VEGFA          |
| chr6 | 43748443 | 43748616 | VEGFA          |
| chr6 | 43749667 | 43749849 | VEGFA          |
| chr6 | 43752252 | 43752390 | VEGFA          |
| chr6 | 51483853 | 51484343 | PKHD1          |
| chr6 | 51491769 | 51491939 | PKHD1          |
| chr6 | 51497337 | 51497546 | PKHD1          |
| chr6 | 51503621 | 51503779 | PKHD1          |
| chr6 | 51512803 | 51512941 | PKHD1          |
| chr6 | 51513857 | 51514043 | PKHD1          |
| chr6 | 51523724 | 51524792 | PKHD1          |
| chr6 | 51586758 | 51586843 | PKHD1          |
| chr6 | 51604766 | 51604842 | PKHD1          |
| chr6 | 51605924 | 51605980 | PKHD1          |
| chr6 | 51609157 | 51609365 | PKHD1          |
| chr6 | 51611493 | 51611712 | PKHD1          |
| chr6 | 51612559 | 51613488 | PKHD1          |

|      |           |           |       |
|------|-----------|-----------|-------|
| chr6 | 51617973  | 51618176  | PKHD1 |
| chr6 | 51619556  | 51619761  | PKHD1 |
| chr6 | 51637474  | 51637612  | PKHD1 |
| chr6 | 51640580  | 51640744  | PKHD1 |
| chr6 | 51656008  | 51656196  | PKHD1 |
| chr6 | 51695633  | 51695812  | PKHD1 |
| chr6 | 51701176  | 51701292  | PKHD1 |
| chr6 | 51712547  | 51712793  | PKHD1 |
| chr6 | 51720665  | 51720893  | PKHD1 |
| chr6 | 51732635  | 51732932  | PKHD1 |
| chr6 | 51735276  | 51735462  | PKHD1 |
| chr6 | 51747865  | 51748050  | PKHD1 |
| chr6 | 51750639  | 51750795  | PKHD1 |
| chr6 | 51751905  | 51752068  | PKHD1 |
| chr6 | 51768369  | 51768550  | PKHD1 |
| chr6 | 51768758  | 51768865  | PKHD1 |
| chr6 | 51770987  | 51771163  | PKHD1 |
| chr6 | 51774055  | 51774297  | PKHD1 |
| chr6 | 51776571  | 51776779  | PKHD1 |
| chr6 | 51777138  | 51777399  | PKHD1 |
| chr6 | 51798882  | 51799145  | PKHD1 |
| chr6 | 51824642  | 51824849  | PKHD1 |
| chr6 | 51875081  | 51875282  | PKHD1 |
| chr6 | 51882182  | 51882452  | PKHD1 |
| chr6 | 51887573  | 51887767  | PKHD1 |
| chr6 | 51889346  | 51891004  | PKHD1 |
| chr6 | 51892601  | 51892719  | PKHD1 |
| chr6 | 51892928  | 51893174  | PKHD1 |
| chr6 | 51897802  | 51897988  | PKHD1 |
| chr6 | 51900363  | 51900544  | PKHD1 |
| chr6 | 51907631  | 51907957  | PKHD1 |
| chr6 | 51908397  | 51908553  | PKHD1 |
| chr6 | 51909738  | 51909911  | PKHD1 |
| chr6 | 51910776  | 51911011  | PKHD1 |
| chr6 | 51913264  | 51913442  | PKHD1 |
| chr6 | 51914929  | 51915118  | PKHD1 |
| chr6 | 51917848  | 51918074  | PKHD1 |
| chr6 | 51918810  | 51918988  | PKHD1 |
| chr6 | 51920359  | 51920552  | PKHD1 |
| chr6 | 51921470  | 51921611  | PKHD1 |
| chr6 | 51921662  | 51921802  | PKHD1 |
| chr6 | 51923095  | 51923424  | PKHD1 |
| chr6 | 51924700  | 51924865  | PKHD1 |
| chr6 | 51927291  | 51927483  | PKHD1 |
| chr6 | 51929727  | 51929873  | PKHD1 |
| chr6 | 51930748  | 51930900  | PKHD1 |
| chr6 | 51934229  | 51934350  | PKHD1 |
| chr6 | 51935178  | 51935268  | PKHD1 |
| chr6 | 51935778  | 51935893  | PKHD1 |
| chr6 | 51936887  | 51937012  | PKHD1 |
| chr6 | 51938235  | 51938364  | PKHD1 |
| chr6 | 51941048  | 51941156  | PKHD1 |
| chr6 | 51944672  | 51944831  | PKHD1 |
| chr6 | 51947164  | 51947365  | PKHD1 |
| chr6 | 51947950  | 51948078  | PKHD1 |
| chr6 | 51949654  | 51949756  | PKHD1 |
| chr6 | 93953118  | 93953283  | EPHA7 |
| chr6 | 93954990  | 93955196  | EPHA7 |
| chr6 | 93956484  | 93956728  | EPHA7 |
| chr6 | 93964339  | 93964539  | EPHA7 |
| chr6 | 93965520  | 93965780  | EPHA7 |
| chr6 | 93967154  | 93967266  | EPHA7 |
| chr6 | 93967791  | 93968027  | EPHA7 |
| chr6 | 93969046  | 93969222  | EPHA7 |
| chr6 | 93973552  | 93973658  | EPHA7 |
| chr6 | 93974286  | 93974445  | EPHA7 |
| chr6 | 93979169  | 93979403  | EPHA7 |
| chr6 | 93981990  | 93982165  | EPHA7 |
| chr6 | 94066409  | 94066795  | EPHA7 |
| chr6 | 94067948  | 94068154  | EPHA7 |
| chr6 | 94120185  | 94120913  | EPHA7 |
| chr6 | 94124395  | 94124510  | EPHA7 |
| chr6 | 94128937  | 94129084  | EPHA7 |
| chr6 | 106534403 | 106534495 | PRDM1 |
| chr6 | 106536050 | 106536349 | PRDM1 |
| chr6 | 106543464 | 106543634 | PRDM1 |
| chr6 | 106546935 | 106546994 | PRDM1 |
| chr6 | 106547149 | 106547452 | PRDM1 |
| chr6 | 106552674 | 106553833 | PRDM1 |
| chr6 | 106554220 | 106554399 | PRDM1 |
| chr6 | 106554760 | 106555386 | PRDM1 |
| chr6 | 117609629 | 117609990 | ROS1  |
| chr6 | 117622111 | 117622325 | ROS1  |
| chr6 | 117629931 | 117630116 | ROS1  |
| chr6 | 117631218 | 117631469 | ROS1  |
| chr6 | 117632157 | 117632305 | ROS1  |
| chr6 | 117638280 | 117638460 | ROS1  |
| chr6 | 117639325 | 117639440 | ROS1  |
| chr6 | 117641005 | 117641218 | ROS1  |
| chr6 | 117642396 | 117642582 | ROS1  |
| chr6 | 117645469 | 117645603 | ROS1  |
| chr6 | 117647361 | 117647602 | ROS1  |
| chr6 | 117650466 | 117650634 | ROS1  |
| chr6 | 117658309 | 117658528 | ROS1  |
| chr6 | 117662272 | 117662499 | ROS1  |
| chr6 | 117662537 | 117662820 | ROS1  |

|      |           |           |              |
|------|-----------|-----------|--------------|
| chr6 | 117663537 | 117663732 | ROS1         |
| chr6 | 117665197 | 117665450 | ROS1         |
| chr6 | 117674127 | 117674357 | ROS1         |
| chr6 | 117677766 | 117678103 | ROS1         |
| chr6 | 117678941 | 117679197 | ROS1         |
| chr6 | 117680946 | 117681199 | ROS1         |
| chr6 | 117681479 | 117681593 | ROS1         |
| chr6 | 117683740 | 117684053 | ROS1         |
| chr6 | 117686197 | 117686392 | ROS1         |
| chr6 | 117686718 | 117686929 | ROS1         |
| chr6 | 117687213 | 117687478 | ROS1         |
| chr6 | 117700196 | 117700347 | ROS1         |
| chr6 | 117704454 | 117704696 | ROS1         |
| chr6 | 117706820 | 117707049 | ROS1         |
| chr6 | 117708026 | 117708187 | ROS1         |
| chr6 | 117708917 | 117709222 | ROS1         |
| chr6 | 117710487 | 117711034 | ROS1         |
| chr6 | 117714361 | 117714509 | ROS1         |
| chr6 | 117715299 | 117715534 | ROS1         |
| chr6 | 117715753 | 117715926 | ROS1         |
| chr6 | 117717325 | 117717452 | ROS1         |
| chr6 | 117718052 | 117718304 | ROS1         |
| chr6 | 117724276 | 117724465 | ROS1         |
| chr6 | 117725417 | 117725616 | ROS1         |
| chr6 | 117730719 | 117730830 | ROS1         |
| chr6 | 117735656 | 117735733 | ROS1         |
| chr6 | 117737395 | 117737505 | ROS1         |
| chr6 | 117739599 | 117739694 | ROS1         |
| chr6 | 117746671 | 117746844 | ROS1         |
| chr6 | 135502626 | 135502699 | MYB          |
| chr6 | 135507015 | 135507183 | MYB          |
| chr6 | 135508946 | 135509068 | MYB          |
| chr6 | 135510903 | 135511046 | MYB          |
| chr6 | 135511239 | 135511510 | MYB          |
| chr6 | 135513436 | 135513721 | MYB          |
| chr6 | 135514950 | 135515081 | MYB          |
| chr6 | 135515468 | 135515647 | MYB          |
| chr6 | 135516860 | 135517165 | MYB, MYB-AS1 |
| chr6 | 135518073 | 135518486 | MYB          |
| chr6 | 135520020 | 135520213 | MYB          |
| chr6 | 135521197 | 135521362 | MYB          |
| chr6 | 135521402 | 135521578 | MYB          |
| chr6 | 135522751 | 135522912 | MYB          |
| chr6 | 135523526 | 135523832 | MYB          |
| chr6 | 135524060 | 135524112 | MYB          |
| chr6 | 135524329 | 135524517 | MYB          |
| chr6 | 135524828 | 135524911 | MYB          |
| chr6 | 135538976 | 135539143 | MYB          |
| chr6 | 138192339 | 138192684 | TNFAIP3      |
| chr6 | 138195956 | 138196197 | TNFAIP3      |
| chr6 | 138196799 | 138196997 | TNFAIP3      |
| chr6 | 138197107 | 138197328 | TNFAIP3      |
| chr6 | 138197387 | 138197442 | TNFAIP3      |
| chr6 | 138198187 | 138198418 | TNFAIP3      |
| chr6 | 138199543 | 138200513 | TNFAIP3      |
| chr6 | 138201182 | 138201414 | TNFAIP3      |
| chr6 | 138202146 | 138202481 | TNFAIP3      |
| chr6 | 152129022 | 152129524 | ESR1         |
| chr6 | 152163706 | 152163947 | ESR1         |
| chr6 | 152201764 | 152201931 | ESR1         |
| chr6 | 152265282 | 152265668 | ESR1         |
| chr6 | 152332765 | 152332954 | ESR1         |
| chr6 | 152382100 | 152382284 | ESR1         |
| chr6 | 152415494 | 152415728 | ESR1         |
| chr6 | 152419841 | 152420126 | ESR1         |
| chr6 | 152446375 | 152446508 | ESR1, SYNE1  |
| chr6 | 157099038 | 157100630 | ARID1B       |
| chr6 | 157150335 | 157150580 | ARID1B       |
| chr6 | 157192722 | 157192811 | ARID1B       |
| chr6 | 157222484 | 157222684 | ARID1B       |
| chr6 | 157256574 | 157256735 | ARID1B       |
| chr6 | 157357943 | 157358035 | ARID1B       |
| chr6 | 157405770 | 157406064 | ARID1B       |
| chr6 | 157431580 | 157431720 | ARID1B       |
| chr6 | 157454136 | 157454366 | ARID1B       |
| chr6 | 157469732 | 157470171 | ARID1B       |
| chr6 | 157488148 | 157488344 | ARID1B       |
| chr6 | 157495116 | 157495276 | ARID1B       |
| chr6 | 157495955 | 157496164 | ARID1B       |
| chr6 | 157502077 | 157502337 | ARID1B       |
| chr6 | 157505339 | 157505594 | ARID1B       |
| chr6 | 157507463 | 157507764 | ARID1B       |
| chr6 | 157510750 | 157510939 | ARID1B       |
| chr6 | 157511146 | 157511369 | ARID1B       |
| chr6 | 157517273 | 157517474 | ARID1B       |
| chr6 | 157519919 | 157520066 | ARID1B       |
| chr6 | 157521813 | 157522647 | ARID1B       |
| chr6 | 157524974 | 157525155 | ARID1B       |
| chr6 | 157527275 | 157529050 | ARID1B       |
| chr6 | 160390253 | 160390452 | IGF2R        |
| chr6 | 160412190 | 160412380 | IGF2R        |
| chr6 | 160430016 | 160430191 | IGF2R        |
| chr6 | 160431693 | 160431842 | IGF2R        |
| chr6 | 160445578 | 160445761 | IGF2R        |
| chr6 | 160448191 | 160448371 | IGF2R        |
| chr6 | 160450556 | 160450712 | IGF2R        |

|      |           |           |             |
|------|-----------|-----------|-------------|
| chr6 | 160453557 | 160453770 | IGF2R       |
| chr6 | 160453948 | 160454164 | IGF2R       |
| chr6 | 160455425 | 160455579 | IGF2R       |
| chr6 | 160461566 | 160461781 | IGF2R       |
| chr6 | 160464154 | 160464345 | IGF2R       |
| chr6 | 160465520 | 160465714 | IGF2R       |
| chr6 | 160466751 | 160466939 | IGF2R       |
| chr6 | 160467504 | 160467702 | IGF2R       |
| chr6 | 160468165 | 160468393 | IGF2R       |
| chr6 | 160468798 | 160468964 | IGF2R       |
| chr6 | 160469381 | 160469600 | IGF2R       |
| chr6 | 160471479 | 160471709 | IGF2R       |
| chr6 | 160477430 | 160477582 | IGF2R       |
| chr6 | 160479029 | 160479181 | IGF2R       |
| chr6 | 160479912 | 160480155 | IGF2R       |
| chr6 | 160481553 | 160481774 | IGF2R       |
| chr6 | 160482509 | 160482703 | IGF2R       |
| chr6 | 160482759 | 160482985 | IGF2R       |
| chr6 | 160483538 | 160483676 | IGF2R       |
| chr6 | 160484421 | 160484687 | IGF2R       |
| chr6 | 160485407 | 160485588 | IGF2R       |
| chr6 | 160485810 | 160485958 | IGF2R       |
| chr6 | 160489255 | 160489442 | IGF2R       |
| chr6 | 160490874 | 160491115 | IGF2R       |
| chr6 | 160492916 | 160493093 | IGF2R       |
| chr6 | 160493771 | 160493941 | IGF2R       |
| chr6 | 160494219 | 160494526 | IGF2R       |
| chr6 | 160494763 | 160495032 | IGF2R       |
| chr6 | 160496853 | 160497053 | IGF2R       |
| chr6 | 160499207 | 160499419 | IGF2R       |
| chr6 | 160500586 | 160500844 | IGF2R       |
| chr6 | 160501135 | 160501332 | IGF2R       |
| chr6 | 160504956 | 160505241 | IGF2R       |
| chr6 | 160506001 | 160506188 | IGF2R       |
| chr6 | 160509039 | 160509204 | IGF2R       |
| chr6 | 160510113 | 160510310 | IGF2R       |
| chr6 | 160510922 | 160511160 | IGF2R       |
| chr6 | 160517445 | 160517682 | IGF2R       |
| chr6 | 160523525 | 160523728 | IGF2R       |
| chr6 | 160524752 | 160524872 | IGF2R       |
| chr6 | 160525680 | 160526141 | IGF2R       |
| chr6 | 161771105 | 161771268 | PRKN        |
| chr6 | 161781094 | 161781262 | PRKN        |
| chr6 | 161790979 | 161791044 | PRKN        |
| chr6 | 161807800 | 161807934 | PRKN        |
| chr6 | 161966420 | 161966494 | PRKN        |
| chr6 | 161969860 | 161970060 | PRKN        |
| chr6 | 161990361 | 161990473 | PRKN        |
| chr6 | 162204672 | 162204742 | PRKN        |
| chr6 | 162206778 | 162206965 | PRKN        |
| chr6 | 162394308 | 162394474 | PRKN        |
| chr6 | 162475097 | 162475231 | PRKN        |
| chr6 | 162622137 | 162622309 | PRKN        |
| chr6 | 162683467 | 162683822 | PRKN        |
| chr6 | 162864316 | 162864534 | PRKN        |
| chr6 | 163148668 | 163148725 | PACRG, PRKN |
| chr6 | 170591936 | 170591992 | DLL1        |
| chr6 | 170592050 | 170592218 | DLL1        |
| chr6 | 170592293 | 170593142 | DLL1        |
| chr6 | 170593981 | 170594248 | DLL1        |
| chr6 | 170594316 | 170594536 | DLL1        |
| chr6 | 170594631 | 170594812 | DLL1        |
| chr6 | 170595300 | 170595411 | DLL1        |
| chr6 | 170597301 | 170597609 | DLL1        |
| chr6 | 170597791 | 170597902 | DLL1        |
| chr6 | 170598574 | 170598921 | DLL1        |
| chr6 | 170599148 | 170599252 | DLL1        |
| chr7 | 2946246   | 2946501   | CARD11      |
| chr7 | 2949658   | 2949824   | CARD11      |
| chr7 | 2951780   | 2951955   | CARD11      |
| chr7 | 2952895   | 2953125   | CARD11      |
| chr7 | 2954845   | 2955031   | CARD11      |
| chr7 | 2956898   | 2957044   | CARD11      |
| chr7 | 2958099   | 2958246   | CARD11      |
| chr7 | 2958980   | 2959271   | CARD11      |
| chr7 | 2962242   | 2962419   | CARD11      |
| chr7 | 2962740   | 2962992   | CARD11      |
| chr7 | 2963841   | 2964024   | CARD11      |
| chr7 | 2966347   | 2966450   | CARD11      |
| chr7 | 2968206   | 2968357   | CARD11      |
| chr7 | 2969600   | 2969733   | CARD11      |
| chr7 | 2972143   | 2972245   | CARD11      |
| chr7 | 2974061   | 2974288   | CARD11      |
| chr7 | 2976645   | 2976893   | CARD11      |
| chr7 | 2977515   | 2977691   | CARD11      |
| chr7 | 2978287   | 2978490   | CARD11      |
| chr7 | 2979357   | 2979587   | CARD11      |
| chr7 | 2983820   | 2984196   | CARD11      |
| chr7 | 2985427   | 2985615   | CARD11      |
| chr7 | 2987183   | 2987446   | CARD11      |
| chr7 | 2998108   | 2998165   | CARD11      |
| chr7 | 6013004   | 6013198   | PMS2        |
| chr7 | 6017193   | 6017413   | PMS2        |
| chr7 | 6018201   | 6018352   | PMS2        |
| chr7 | 6022429   | 6022647   | PMS2        |
| chr7 | 6026364   | 6027276   | PMS2        |

|      |          |          |                  |
|------|----------|----------|------------------|
| chr7 | 6029405  | 6029611  | PMS2             |
| chr7 | 6031578  | 6031713  | PMS2             |
| chr7 | 6035139  | 6035289  | PMS2             |
| chr7 | 6036931  | 6037079  | PMS2             |
| chr7 | 6038713  | 6038931  | PMS2             |
| chr7 | 6042058  | 6042292  | PMS2             |
| chr7 | 6043295  | 6043448  | PMS2             |
| chr7 | 6043577  | 6043714  | PMS2             |
| chr7 | 6045497  | 6045687  | PMS2             |
| chr7 | 6048602  | 6048675  | PMS2             |
| chr7 | 6414341  | 6414426  | RAC1             |
| chr7 | 6426817  | 6426939  | RAC1             |
| chr7 | 6431529  | 6431697  | RAC1             |
| chr7 | 6438267  | 6438374  | RAC1             |
| chr7 | 6439731  | 6439844  | RAC1             |
| chr7 | 6441473  | 6441683  | RAC1             |
| chr7 | 6441921  | 6442102  | RAC1             |
| chr7 | 17338863 | 17338978 | AHR              |
| chr7 | 17349534 | 17349772 | AHR              |
| chr7 | 17362099 | 17362256 | AHR              |
| chr7 | 17367357 | 17367497 | AHR              |
| chr7 | 17369550 | 17369724 | AHR              |
| chr7 | 17370354 | 17370535 | AHR              |
| chr7 | 17373510 | 17373763 | AHR              |
| chr7 | 17374485 | 17374645 | AHR              |
| chr7 | 17375243 | 17375435 | AHR              |
| chr7 | 17378584 | 17379877 | AHR              |
| chr7 | 17382519 | 17382713 | AHR              |
| chr7 | 27147508 | 27148364 | HOXA-AS2, HOXA3  |
| chr7 | 27149708 | 27150284 | HOXA-AS2, HOXA3  |
| chr7 | 41729222 | 41730165 | INHBA            |
| chr7 | 41739559 | 41739997 | INHBA, INHBA-AS1 |
| chr7 | 50358632 | 50358722 | IKZF1            |
| chr7 | 50367208 | 50367378 | IKZF1            |
| chr7 | 50435678 | 50436093 | IKZF1            |
| chr7 | 50444205 | 50444516 | IKZF1            |
| chr7 | 50450212 | 50450430 | IKZF1            |
| chr7 | 50455017 | 50455193 | IKZF1            |
| chr7 | 50459401 | 50459586 | IKZF1            |
| chr7 | 50467590 | 50468350 | IKZF1            |
| chr7 | 55086945 | 55087083 | EGFR             |
| chr7 | 55209953 | 55210155 | EGFR             |
| chr7 | 55210972 | 55211206 | EGFR             |
| chr7 | 55214273 | 55214458 | EGFR             |
| chr7 | 55218961 | 55219080 | EGFR             |
| chr7 | 55220004 | 55220064 | EGFR             |
| chr7 | 55220213 | 55220382 | EGFR             |
| chr7 | 55221678 | 55221870 | EGFR             |
| chr7 | 55223497 | 55223664 | EGFR             |
| chr7 | 55224200 | 55224377 | EGFR             |
| chr7 | 55224426 | 55224561 | EGFR             |
| chr7 | 55225330 | 55225471 | EGFR             |
| chr7 | 55227806 | 55228056 | EGFR             |
| chr7 | 55229166 | 55229349 | EGFR             |
| chr7 | 55231400 | 55231541 | EGFR             |
| chr7 | 55232947 | 55233155 | EGFR             |
| chr7 | 55236190 | 55236247 | EGFR             |
| chr7 | 55237974 | 55238262 | EGFR             |
| chr7 | 55238842 | 55238931 | EGFR             |
| chr7 | 55240513 | 55240618 | EGFR             |
| chr7 | 55240650 | 55240842 | EGFR             |
| chr7 | 55241588 | 55241761 | EGFR             |
| chr7 | 55242389 | 55242538 | EGFR             |
| chr7 | 55248960 | 55249196 | EGFR, EGFR-AS1   |
| chr7 | 55259386 | 55259592 | EGFR             |
| chr7 | 55260433 | 55260559 | EGFR             |
| chr7 | 55266384 | 55266581 | EGFR             |
| chr7 | 55267983 | 55268131 | EGFR             |
| chr7 | 55268855 | 55269073 | EGFR             |
| chr7 | 55269402 | 55269500 | EGFR             |
| chr7 | 55270184 | 55270483 | EGFR             |
| chr7 | 55272923 | 55273335 | EGFR             |
| chr7 | 77648532 | 77649318 | MAGI2            |
| chr7 | 77694865 | 77695004 | MAGI2            |
| chr7 | 77708238 | 77708427 | MAGI2            |
| chr7 | 77754985 | 77755179 | MAGI2            |
| chr7 | 77756488 | 77756758 | MAGI2            |
| chr7 | 77762180 | 77762402 | MAGI2            |
| chr7 | 77764312 | 77764548 | MAGI2            |
| chr7 | 77789316 | 77789615 | MAGI2            |
| chr7 | 77797207 | 77797450 | MAGI2            |
| chr7 | 77807302 | 77807444 | MAGI2            |
| chr7 | 77814920 | 77815012 | MAGI2            |
| chr7 | 77824165 | 77824405 | MAGI2            |
| chr7 | 77830453 | 77830535 | MAGI2            |
| chr7 | 77885124 | 77885923 | MAGI2            |
| chr7 | 77973069 | 77973302 | MAGI2            |
| chr7 | 77975213 | 77975385 | MAGI2            |
| chr7 | 77998447 | 77998555 | MAGI2            |
| chr7 | 78119052 | 78119182 | MAGI2            |
| chr7 | 78130868 | 78131129 | MAGI2            |
| chr7 | 78150721 | 78150987 | MAGI2            |
| chr7 | 78212712 | 78212796 | MAGI2            |
| chr7 | 78256410 | 78256580 | MAGI2            |
| chr7 | 78636380 | 78636547 | MAGI2            |
| chr7 | 79082310 | 79082661 | MAGI2, MAGI2-AS3 |

|      |           |           |        |
|------|-----------|-----------|--------|
| chr7 | 81331871  | 81332098  | HGF    |
| chr7 | 81334680  | 81334876  | HGF    |
| chr7 | 81334937  | 81335094  | HGF    |
| chr7 | 81335577  | 81335768  | HGF    |
| chr7 | 81336580  | 81336705  | HGF    |
| chr7 | 81339437  | 81339584  | HGF    |
| chr7 | 81340771  | 81340860  | HGF    |
| chr7 | 81346522  | 81346706  | HGF    |
| chr7 | 81350035  | 81350188  | HGF    |
| chr7 | 81355180  | 81355358  | HGF    |
| chr7 | 81358895  | 81359120  | HGF    |
| chr7 | 81372215  | 81372291  | HGF    |
| chr7 | 81372643  | 81372812  | HGF    |
| chr7 | 81374290  | 81374461  | HGF    |
| chr7 | 81381402  | 81381603  | HGF    |
| chr7 | 81385281  | 81385404  | HGF    |
| chr7 | 81386475  | 81386644  | HGF    |
| chr7 | 81387982  | 81388145  | HGF    |
| chr7 | 81391997  | 81392213  | HGF    |
| chr7 | 81399174  | 81399312  | HGF    |
| chr7 | 87133533  | 87133790  | ABCB1  |
| chr7 | 87135187  | 87135384  | ABCB1  |
| chr7 | 87138565  | 87138822  | ABCB1  |
| chr7 | 87144521  | 87144769  | ABCB1  |
| chr7 | 87145799  | 87146006  | ABCB1  |
| chr7 | 87148616  | 87148807  | ABCB1  |
| chr7 | 87150066  | 87150217  | ABCB1  |
| chr7 | 87160584  | 87160838  | ABCB1  |
| chr7 | 87165748  | 87165882  | ABCB1  |
| chr7 | 87168558  | 87168686  | ABCB1  |
| chr7 | 87170647  | 87170805  | ABCB1  |
| chr7 | 87173419  | 87173616  | ABCB1  |
| chr7 | 87174113  | 87174340  | ABCB1  |
| chr7 | 87175153  | 87175365  | ABCB1  |
| chr7 | 87178638  | 87178859  | ABCB1  |
| chr7 | 87179141  | 87179395  | ABCB1  |
| chr7 | 87179461  | 87179637  | ABCB1  |
| chr7 | 87179758  | 87179919  | ABCB1  |
| chr7 | 87180015  | 87180179  | ABCB1  |
| chr7 | 87183051  | 87183273  | ABCB1  |
| chr7 | 87190553  | 87190728  | ABCB1  |
| chr7 | 87192659  | 87192723  | ABCB1  |
| chr7 | 87193429  | 87193493  | ABCB1  |
| chr7 | 87194756  | 87194823  | ABCB1  |
| chr7 | 87195360  | 87195582  | ABCB1  |
| chr7 | 87196075  | 87196317  | ABCB1  |
| chr7 | 87199462  | 87199564  | ABCB1  |
| chr7 | 87214802  | 87215021  | ABCB1  |
| chr7 | 87225056  | 87225155  | ABCB1  |
| chr7 | 87229407  | 87229525  | ABCB1  |
| chr7 | 92244428  | 92244625  | CDK6   |
| chr7 | 92247360  | 92247546  | CDK6   |
| chr7 | 92252324  | 92252425  | CDK6   |
| chr7 | 92300714  | 92300874  | CDK6   |
| chr7 | 92354914  | 92355132  | CDK6   |
| chr7 | 92403984  | 92404170  | CDK6   |
| chr7 | 92462379  | 92462662  | CDK6   |
| chr7 | 99245902  | 99246048  | CYP3A5 |
| chr7 | 99247670  | 99247880  | CYP3A5 |
| chr7 | 99250150  | 99250427  | CYP3A5 |
| chr7 | 99258096  | 99258307  | CYP3A5 |
| chr7 | 99260413  | 99260530  | CYP3A5 |
| chr7 | 99261565  | 99261743  | CYP3A5 |
| chr7 | 99262763  | 99262962  | CYP3A5 |
| chr7 | 99264198  | 99264337  | CYP3A5 |
| chr7 | 99264549  | 99264713  | CYP3A5 |
| chr7 | 99269371  | 99269526  | CYP3A5 |
| chr7 | 99270177  | 99270327  | CYP3A5 |
| chr7 | 99272130  | 99272233  | CYP3A5 |
| chr7 | 99273712  | 99273856  | CYP3A5 |
| chr7 | 99273914  | 99274005  | CYP3A5 |
| chr7 | 99274125  | 99274224  | CYP3A5 |
| chr7 | 99277423  | 99277544  | CYP3A5 |
| chr7 | 99355730  | 99355876  | CYP3A4 |
| chr7 | 99358416  | 99358629  | CYP3A4 |
| chr7 | 99359638  | 99359915  | CYP3A4 |
| chr7 | 99361452  | 99361663  | CYP3A4 |
| chr7 | 99363974  | 99364091  | CYP3A4 |
| chr7 | 99364728  | 99364906  | CYP3A4 |
| chr7 | 99365951  | 99366150  | CYP3A4 |
| chr7 | 99367365  | 99367504  | CYP3A4 |
| chr7 | 99367719  | 99367883  | CYP3A4 |
| chr7 | 99370187  | 99370337  | CYP3A4 |
| chr7 | 99375625  | 99375728  | CYP3A4 |
| chr7 | 99377589  | 99377733  | CYP3A4 |
| chr7 | 99381608  | 99381729  | CYP3A4 |
| chr7 | 100401057 | 100401237 | EPHB4  |
| chr7 | 100402762 | 100402968 | EPHB4  |
| chr7 | 100403097 | 100403341 | EPHB4  |
| chr7 | 100404016 | 100404216 | EPHB4  |
| chr7 | 100404961 | 100405227 | EPHB4  |
| chr7 | 100410343 | 100410641 | EPHB4  |
| chr7 | 100410691 | 100410855 | EPHB4  |
| chr7 | 100411248 | 100411363 | EPHB4  |
| chr7 | 100411515 | 100411668 | EPHB4  |
| chr7 | 100414788 | 100415004 | EPHB4  |

|      |           |           |        |
|------|-----------|-----------|--------|
| chr7 | 100416116 | 100416291 | EPHB4  |
| chr7 | 100417153 | 100417536 | EPHB4  |
| chr7 | 100417737 | 100417943 | EPHB4  |
| chr7 | 100419867 | 100420314 | EPHB4  |
| chr7 | 100421240 | 100421578 | EPHB4  |
| chr7 | 100421799 | 100421920 | EPHB4  |
| chr7 | 100424575 | 100424677 | EPHB4  |
| chr7 | 101459285 | 101459398 | CUX1   |
| chr7 | 101460894 | 101460974 | CUX1   |
| chr7 | 101559369 | 101559530 | CUX1   |
| chr7 | 101671352 | 101671450 | CUX1   |
| chr7 | 101713593 | 101713722 | CUX1   |
| chr7 | 101740618 | 101740806 | CUX1   |
| chr7 | 101747590 | 101747764 | CUX1   |
| chr7 | 101754952 | 101755079 | CUX1   |
| chr7 | 101758461 | 101758578 | CUX1   |
| chr7 | 101801814 | 101801913 | CUX1   |
| chr7 | 101813700 | 101813855 | CUX1   |
| chr7 | 101821723 | 101821962 | CUX1   |
| chr7 | 101833067 | 101833176 | CUX1   |
| chr7 | 101837096 | 101837195 | CUX1   |
| chr7 | 101838761 | 101838908 | CUX1   |
| chr7 | 101839888 | 101840610 | CUX1   |
| chr7 | 101842056 | 101842172 | CUX1   |
| chr7 | 101843325 | 101843477 | CUX1   |
| chr7 | 101844614 | 101845509 | CUX1   |
| chr7 | 101847645 | 101847861 | CUX1   |
| chr7 | 101848368 | 101848475 | CUX1   |
| chr7 | 101870621 | 101870974 | CUX1   |
| chr7 | 101877306 | 101877545 | CUX1   |
| chr7 | 101882574 | 101882889 | CUX1   |
| chr7 | 101891666 | 101892347 | CUX1   |
| chr7 | 101916611 | 101916789 | CUX1   |
| chr7 | 101917489 | 101917606 | CUX1   |
| chr7 | 101918492 | 101918655 | CUX1   |
| chr7 | 101921194 | 101921361 | CUX1   |
| chr7 | 101923303 | 101923437 | CUX1   |
| chr7 | 101924070 | 101924177 | CUX1   |
| chr7 | 101925106 | 101925237 | CUX1   |
| chr7 | 101925978 | 101926093 | CUX1   |
| chr7 | 101926287 | 101926407 | CUX1   |
| chr7 | 106507981 | 106510026 | PIK3CG |
| chr7 | 106512956 | 106513072 | PIK3CG |
| chr7 | 106513132 | 106513408 | PIK3CG |
| chr7 | 106515119 | 106515273 | PIK3CG |
| chr7 | 106519938 | 106520135 | PIK3CG |
| chr7 | 106522536 | 106522677 | PIK3CG |
| chr7 | 106523452 | 106523633 | PIK3CG |
| chr7 | 106524574 | 106524736 | PIK3CG |
| chr7 | 106526554 | 106526762 | PIK3CG |
| chr7 | 106545528 | 106545857 | PIK3CG |
| chr7 | 116339113 | 116340363 | MET    |
| chr7 | 116371696 | 116371938 | MET    |
| chr7 | 116379978 | 116380163 | MET    |
| chr7 | 116380880 | 116381104 | MET    |
| chr7 | 116395383 | 116395594 | MET    |
| chr7 | 116397465 | 116397618 | MET    |
| chr7 | 116397666 | 116397853 | MET    |
| chr7 | 116398487 | 116398699 | MET    |
| chr7 | 116399365 | 116399569 | MET    |
| chr7 | 116403078 | 116403347 | MET    |
| chr7 | 116409673 | 116409870 | MET    |
| chr7 | 116411526 | 116411733 | MET    |
| chr7 | 116411877 | 116412068 | MET    |
| chr7 | 116414909 | 116415190 | MET    |
| chr7 | 116417417 | 116417548 | MET    |
| chr7 | 116418804 | 116419036 | MET    |
| chr7 | 116422016 | 116422176 | MET    |
| chr7 | 116423332 | 116423548 | MET    |
| chr7 | 116435683 | 116435870 | MET    |
| chr7 | 116435915 | 116436203 | MET    |
| chr7 | 128828967 | 128829348 | SMO    |
| chr7 | 128843199 | 128843455 | SMO    |
| chr7 | 128845018 | 128845278 | SMO    |
| chr7 | 128845425 | 128845648 | SMO    |
| chr7 | 128845965 | 128846235 | SMO    |
| chr7 | 128846279 | 128846453 | SMO    |
| chr7 | 128848574 | 128848717 | SMO    |
| chr7 | 128849104 | 128849263 | SMO    |
| chr7 | 128850178 | 128850414 | SMO    |
| chr7 | 128850780 | 128850979 | SMO    |
| chr7 | 128851451 | 128851636 | SMO    |
| chr7 | 128851839 | 128852317 | SMO    |
| chr7 | 140434371 | 140434595 | BRAF   |
| chr7 | 140439586 | 140439771 | BRAF   |
| chr7 | 140449061 | 140449243 | BRAF   |
| chr7 | 140453049 | 140453218 | BRAF   |
| chr7 | 140453961 | 140454058 | BRAF   |
| chr7 | 140476686 | 140476913 | BRAF   |
| chr7 | 140477765 | 140477900 | BRAF   |
| chr7 | 140481350 | 140481518 | BRAF   |
| chr7 | 140482795 | 140482982 | BRAF   |
| chr7 | 140487322 | 140487409 | BRAF   |
| chr7 | 140494082 | 140494292 | BRAF   |
| chr7 | 140500136 | 140500306 | BRAF   |
| chr7 | 140501186 | 140501385 | BRAF   |



|      |           |           |       |
|------|-----------|-----------|-------|
| chr7 | 140507734 | 140507887 | BRAF  |
| chr7 | 140508666 | 140508820 | BRAF  |
| chr7 | 140534383 | 140534697 | BRAF  |
| chr7 | 140549885 | 140550037 | BRAF  |
| chr7 | 140624340 | 140624528 | BRAF  |
| chr7 | 142560960 | 142561110 | EPHB6 |
| chr7 | 142561363 | 142561478 | EPHB6 |
| chr7 | 142561698 | 142562529 | EPHB6 |
| chr7 | 142563204 | 142563410 | EPHB6 |
| chr7 | 142563689 | 142564096 | EPHB6 |
| chr7 | 142564210 | 142564385 | EPHB6 |
| chr7 | 142564635 | 142564848 | EPHB6 |
| chr7 | 142565337 | 142565502 | EPHB6 |
| chr7 | 142565726 | 142565829 | EPHB6 |
| chr7 | 142565970 | 142566140 | EPHB6 |
| chr7 | 142566221 | 142566519 | EPHB6 |
| chr7 | 142566701 | 142566925 | EPHB6 |
| chr7 | 142567544 | 142567744 | EPHB6 |
| chr7 | 142567941 | 142568185 | EPHB6 |
| chr7 | 142568257 | 142568463 | EPHB6 |
| chr7 | 142568523 | 142568682 | EPHB6 |
| chr7 | 148504712 | 148504823 | EZH2  |
| chr7 | 148506137 | 148506272 | EZH2  |
| chr7 | 148506376 | 148506507 | EZH2  |
| chr7 | 148507399 | 148507531 | EZH2  |
| chr7 | 148508691 | 148508837 | EZH2  |
| chr7 | 148511025 | 148511254 | EZH2  |
| chr7 | 148511980 | 148512156 | EZH2  |
| chr7 | 148512572 | 148512663 | EZH2  |
| chr7 | 148513750 | 148513895 | EZH2  |
| chr7 | 148514288 | 148514508 | EZH2  |
| chr7 | 148514943 | 148515234 | EZH2  |
| chr7 | 148516105 | 148516176 | EZH2  |
| chr7 | 148516662 | 148516804 | EZH2  |
| chr7 | 148523520 | 148523749 | EZH2  |
| chr7 | 148524230 | 148524383 | EZH2  |
| chr7 | 148525806 | 148525997 | EZH2  |
| chr7 | 148526794 | 148526965 | EZH2  |
| chr7 | 148529700 | 148529867 | EZH2  |
| chr7 | 148543536 | 148543715 | EZH2  |
| chr7 | 148544248 | 148544415 | EZH2  |
| chr7 | 150642427 | 150642627 | KCNH2 |
| chr7 | 150643939 | 150644167 | KCNH2 |
| chr7 | 150644390 | 150644627 | KCNH2 |
| chr7 | 150644668 | 150644991 | KCNH2 |
| chr7 | 150645506 | 150645656 | KCNH2 |
| chr7 | 150645918 | 150646162 | KCNH2 |
| chr7 | 150646961 | 150647533 | KCNH2 |
| chr7 | 150647983 | 150648233 | KCNH2 |
| chr7 | 150648510 | 150648948 | KCNH2 |
| chr7 | 150649487 | 150649966 | KCNH2 |
| chr7 | 150652458 | 150652616 | KCNH2 |
| chr7 | 150654353 | 150654615 | KCNH2 |
| chr7 | 150655121 | 150655615 | KCNH2 |
| chr7 | 150656634 | 150656868 | KCNH2 |
| chr7 | 150671773 | 150672054 | KCNH2 |
| chr7 | 150674900 | 150675026 | KCNH2 |
| chr7 | 151833891 | 151834034 | KMT2C |
| chr7 | 151835855 | 151836014 | KMT2C |
| chr7 | 151836245 | 151836369 | KMT2C |
| chr7 | 151836734 | 151836901 | KMT2C |
| chr7 | 151841772 | 151841991 | KMT2C |
| chr7 | 151842212 | 151842405 | KMT2C |
| chr7 | 151843658 | 151843845 | KMT2C |
| chr7 | 151845092 | 151846262 | KMT2C |
| chr7 | 151847959 | 151848117 | KMT2C |
| chr7 | 151848501 | 151848691 | KMT2C |
| chr7 | 151849764 | 151850064 | KMT2C |
| chr7 | 151851069 | 151851256 | KMT2C |
| chr7 | 151851326 | 151851555 | KMT2C |
| chr7 | 151852969 | 151853167 | KMT2C |
| chr7 | 151853264 | 151853456 | KMT2C |
| chr7 | 151854820 | 151855035 | KMT2C |
| chr7 | 151855916 | 151856182 | KMT2C |
| chr7 | 151859176 | 151860936 | KMT2C |
| chr7 | 151864205 | 151864488 | KMT2C |
| chr7 | 151866245 | 151866359 | KMT2C |
| chr7 | 151868323 | 151868452 | KMT2C |
| chr7 | 151871190 | 151871352 | KMT2C |
| chr7 | 151873250 | 151875120 | KMT2C |
| chr7 | 151876893 | 151877236 | KMT2C |
| chr7 | 151877770 | 151879704 | KMT2C |
| chr7 | 151880033 | 151880266 | KMT2C |
| chr7 | 151882617 | 151882741 | KMT2C |
| chr7 | 151884321 | 151884586 | KMT2C |
| chr7 | 151884774 | 151884957 | KMT2C |
| chr7 | 151891068 | 151891238 | KMT2C |
| chr7 | 151891288 | 151891371 | KMT2C |
| chr7 | 151891499 | 151891678 | KMT2C |
| chr7 | 151892966 | 151893121 | KMT2C |
| chr7 | 151896338 | 151896569 | KMT2C |
| chr7 | 151899993 | 151900174 | KMT2C |
| chr7 | 151902165 | 151902335 | KMT2C |
| chr7 | 151904359 | 151904538 | KMT2C |
| chr7 | 151917582 | 151917845 | KMT2C |
| chr7 | 151919060 | 151919176 | KMT2C |

|      |           |           |        |
|------|-----------|-----------|--------|
| chr7 | 151919632 | 151919792 | KMT2C  |
| chr7 | 151921074 | 151921289 | KMT2C  |
| chr7 | 151921494 | 151921726 | KMT2C  |
| chr7 | 151926982 | 151927137 | KMT2C  |
| chr7 | 151927279 | 151927431 | KMT2C  |
| chr7 | 151932876 | 151933043 | KMT2C  |
| chr7 | 151935766 | 151935936 | KMT2C  |
| chr7 | 151944961 | 151945730 | KMT2C  |
| chr7 | 151946935 | 151947063 | KMT2C  |
| chr7 | 151947912 | 151948076 | KMT2C  |
| chr7 | 151948998 | 151949200 | KMT2C  |
| chr7 | 151949605 | 151949825 | KMT2C  |
| chr7 | 151960075 | 151960240 | KMT2C  |
| chr7 | 151962097 | 151962319 | KMT2C  |
| chr7 | 151970764 | 151970977 | KMT2C  |
| chr7 | 152007025 | 152007185 | KMT2C  |
| chr7 | 152008857 | 152009056 | KMT2C  |
| chr7 | 152012197 | 152012448 | KMT2C  |
| chr7 | 152027660 | 152027849 | KMT2C  |
| chr7 | 152055646 | 152055785 | KMT2C  |
| chr7 | 152132685 | 152132896 | KMT2C  |
| chr8 | 9413424   | 9414206   | TNKS   |
| chr8 | 9437643   | 9437918   | TNKS   |
| chr8 | 9473066   | 9473212   | TNKS   |
| chr8 | 9537435   | 9537522   | TNKS   |
| chr8 | 9538209   | 9538335   | TNKS   |
| chr8 | 9562147   | 9562292   | TNKS   |
| chr8 | 9563671   | 9563788   | TNKS   |
| chr8 | 9564295   | 9564532   | TNKS   |
| chr8 | 9565855   | 9566027   | TNKS   |
| chr8 | 9567439   | 9567581   | TNKS   |
| chr8 | 9567626   | 9567860   | TNKS   |
| chr8 | 9577858   | 9578080   | TNKS   |
| chr8 | 9584125   | 9584255   | TNKS   |
| chr8 | 9588374   | 9588570   | TNKS   |
| chr8 | 9590763   | 9590979   | TNKS   |
| chr8 | 9592349   | 9592619   | TNKS   |
| chr8 | 9592861   | 9593021   | TNKS   |
| chr8 | 9605508   | 9605747   | TNKS   |
| chr8 | 9609093   | 9609381   | TNKS   |
| chr8 | 9610028   | 9610161   | TNKS   |
| chr8 | 9619000   | 9619171   | TNKS   |
| chr8 | 9620631   | 9620779   | TNKS   |
| chr8 | 9622200   | 9622325   | TNKS   |
| chr8 | 9623176   | 9623332   | TNKS   |
| chr8 | 9623723   | 9623960   | TNKS   |
| chr8 | 9627590   | 9627797   | TNKS   |
| chr8 | 9634134   | 9634271   | TNKS   |
| chr8 | 18257488  | 18258411  | NAT2   |
| chr8 | 37654761  | 37655077  | ADGRA2 |
| chr8 | 37672388  | 37672510  | ADGRA2 |
| chr8 | 37686380  | 37686502  | ADGRA2 |
| chr8 | 37686753  | 37686875  | ADGRA2 |
| chr8 | 37686980  | 37687102  | ADGRA2 |
| chr8 | 37687343  | 37687557  | ADGRA2 |
| chr8 | 37688202  | 37688466  | ADGRA2 |
| chr8 | 37688915  | 37689130  | ADGRA2 |
| chr8 | 37690502  | 37690751  | ADGRA2 |
| chr8 | 37691180  | 37691380  | ADGRA2 |
| chr8 | 37691459  | 37691671  | ADGRA2 |
| chr8 | 37692666  | 37692941  | ADGRA2 |
| chr8 | 37693046  | 37693313  | ADGRA2 |
| chr8 | 37695223  | 37695482  | ADGRA2 |
| chr8 | 37696448  | 37696626  | ADGRA2 |
| chr8 | 37696991  | 37697165  | ADGRA2 |
| chr8 | 37697613  | 37697809  | ADGRA2 |
| chr8 | 37698252  | 37698392  | ADGRA2 |
| chr8 | 37698578  | 37698998  | ADGRA2 |
| chr8 | 38271120  | 38271347  | FGFR1  |
| chr8 | 38271410  | 38271566  | FGFR1  |
| chr8 | 38271644  | 38271832  | FGFR1  |
| chr8 | 38272051  | 38272172  | FGFR1  |
| chr8 | 38272271  | 38272444  | FGFR1  |
| chr8 | 38273337  | 38273603  | FGFR1  |
| chr8 | 38274798  | 38274959  | FGFR1  |
| chr8 | 38275362  | 38275534  | FGFR1  |
| chr8 | 38275720  | 38275916  | FGFR1  |
| chr8 | 38277025  | 38277278  | FGFR1  |
| chr8 | 38279289  | 38279484  | FGFR1  |
| chr8 | 38280517  | 38280718  | FGFR1  |
| chr8 | 38282001  | 38282242  | FGFR1  |
| chr8 | 38283614  | 38283788  | FGFR1  |
| chr8 | 38285413  | 38285636  | FGFR1  |
| chr8 | 38285838  | 38285987  | FGFR1  |
| chr8 | 38287174  | 38287491  | FGFR1  |
| chr8 | 38297798  | 38297915  | FGFR1  |
| chr8 | 38314848  | 38315077  | FGFR1  |
| chr8 | 38318588  | 38318649  | FGFR1  |
| chr8 | 48685749  | 48685836  | PRKDC  |
| chr8 | 48686708  | 48686963  | PRKDC  |
| chr8 | 48689379  | 48689569  | PRKDC  |
| chr8 | 48690221  | 48690460  | PRKDC  |
| chr8 | 48690994  | 48691246  | PRKDC  |
| chr8 | 48691263  | 48691385  | PRKDC  |
| chr8 | 48691539  | 48691679  | PRKDC  |
| chr8 | 48694697  | 48694840  | PRKDC  |

|      |          |          |         |
|------|----------|----------|---------|
| chr8 | 48694913 | 48695184 | PRKDC   |
| chr8 | 48696277 | 48696395 | PRKDC   |
| chr8 | 48697648 | 48697903 | PRKDC   |
| chr8 | 48701441 | 48701635 | PRKDC   |
| chr8 | 48701686 | 48701824 | PRKDC   |
| chr8 | 48706825 | 48707087 | PRKDC   |
| chr8 | 48710772 | 48710983 | PRKDC   |
| chr8 | 48711745 | 48711976 | PRKDC   |
| chr8 | 48713328 | 48713572 | PRKDC   |
| chr8 | 48715841 | 48716066 | PRKDC   |
| chr8 | 48719672 | 48719912 | PRKDC   |
| chr8 | 48729985 | 48730147 | PRKDC   |
| chr8 | 48731937 | 48732096 | PRKDC   |
| chr8 | 48733254 | 48733529 | PRKDC   |
| chr8 | 48734139 | 48734378 | PRKDC   |
| chr8 | 48736393 | 48736582 | PRKDC   |
| chr8 | 48739191 | 48739447 | PRKDC   |
| chr8 | 48740703 | 48740933 | PRKDC   |
| chr8 | 48743140 | 48743322 | PRKDC   |
| chr8 | 48744349 | 48744512 | PRKDC   |
| chr8 | 48746731 | 48746982 | PRKDC   |
| chr8 | 48748873 | 48749113 | PRKDC   |
| chr8 | 48749747 | 48750005 | PRKDC   |
| chr8 | 48751683 | 48751832 | PRKDC   |
| chr8 | 48752551 | 48752775 | PRKDC   |
| chr8 | 48761689 | 48761889 | PRKDC   |
| chr8 | 48761914 | 48762089 | PRKDC   |
| chr8 | 48765208 | 48765370 | PRKDC   |
| chr8 | 48766618 | 48766800 | PRKDC   |
| chr8 | 48767757 | 48767959 | PRKDC   |
| chr8 | 48769691 | 48769885 | PRKDC   |
| chr8 | 48771051 | 48771221 | PRKDC   |
| chr8 | 48771384 | 48771572 | PRKDC   |
| chr8 | 48772146 | 48772345 | PRKDC   |
| chr8 | 48773434 | 48773557 | PRKDC   |
| chr8 | 48774597 | 48774713 | PRKDC   |
| chr8 | 48774908 | 48775127 | PRKDC   |
| chr8 | 48775934 | 48776163 | PRKDC   |
| chr8 | 48777091 | 48777349 | PRKDC   |
| chr8 | 48790259 | 48790437 | PRKDC   |
| chr8 | 48792026 | 48792244 | PRKDC   |
| chr8 | 48793951 | 48794106 | PRKDC   |
| chr8 | 48794447 | 48794683 | PRKDC   |
| chr8 | 48798479 | 48798733 | PRKDC   |
| chr8 | 48800082 | 48800291 | PRKDC   |
| chr8 | 48801053 | 48801236 | PRKDC   |
| chr8 | 48801549 | 48801808 | PRKDC   |
| chr8 | 48802792 | 48803066 | PRKDC   |
| chr8 | 48805674 | 48805972 | PRKDC   |
| chr8 | 48809695 | 48809879 | PRKDC   |
| chr8 | 48811004 | 48811154 | PRKDC   |
| chr8 | 48812907 | 48813052 | PRKDC   |
| chr8 | 48815103 | 48815380 | PRKDC   |
| chr8 | 48817403 | 48817561 | PRKDC   |
| chr8 | 48824944 | 48825147 | PRKDC   |
| chr8 | 48826435 | 48826649 | PRKDC   |
| chr8 | 48827862 | 48828003 | PRKDC   |
| chr8 | 48830811 | 48830968 | PRKDC   |
| chr8 | 48839728 | 48839938 | PRKDC   |
| chr8 | 48840305 | 48840475 | PRKDC   |
| chr8 | 48841626 | 48841763 | PRKDC   |
| chr8 | 48842387 | 48842597 | PRKDC   |
| chr8 | 48843206 | 48843372 | PRKDC   |
| chr8 | 48845554 | 48845757 | PRKDC   |
| chr8 | 48846499 | 48846675 | PRKDC   |
| chr8 | 48847543 | 48847643 | PRKDC   |
| chr8 | 48848266 | 48848485 | PRKDC   |
| chr8 | 48848887 | 48849102 | PRKDC   |
| chr8 | 48852085 | 48852282 | PRKDC   |
| chr8 | 48855743 | 48855951 | PRKDC   |
| chr8 | 48856387 | 48856468 | PRKDC   |
| chr8 | 48856508 | 48856614 | PRKDC   |
| chr8 | 48866154 | 48866304 | PRKDC   |
| chr8 | 48866341 | 48866504 | PRKDC   |
| chr8 | 48866872 | 48867031 | PRKDC   |
| chr8 | 48868408 | 48868533 | PRKDC   |
| chr8 | 48869705 | 48869848 | PRKDC   |
| chr8 | 48869889 | 48870016 | PRKDC   |
| chr8 | 48872507 | 48872711 | PRKDC   |
| chr8 | 56854393 | 56854575 | LYN     |
| chr8 | 56858981 | 56859077 | LYN     |
| chr8 | 56860151 | 56860307 | LYN     |
| chr8 | 56862992 | 56863141 | LYN     |
| chr8 | 56863214 | 56863368 | LYN     |
| chr8 | 56864499 | 56864699 | LYN     |
| chr8 | 56866365 | 56866568 | LYN     |
| chr8 | 56879248 | 56879481 | LYN     |
| chr8 | 56882250 | 56882377 | LYN     |
| chr8 | 56910879 | 56911083 | LYN     |
| chr8 | 56911951 | 56912133 | LYN     |
| chr8 | 56922441 | 56922694 | LYN     |
| chr8 | 92972444 | 92972770 | RUNX1T1 |
| chr8 | 92982860 | 92983101 | RUNX1T1 |
| chr8 | 92988107 | 92988226 | RUNX1T1 |
| chr8 | 92998326 | 92998578 | RUNX1T1 |
| chr8 | 92999089 | 92999225 | RUNX1T1 |

|      |           |           |                    |
|------|-----------|-----------|--------------------|
| chr8 | 93003841  | 93004142  | RUNX1T1            |
| chr8 | 93017314  | 93017550  | RUNX1T1            |
| chr8 | 93023204  | 93023344  | RUNX1T1            |
| chr8 | 93026781  | 93027073  | RUNX1T1            |
| chr8 | 93029428  | 93029616  | RUNX1T1            |
| chr8 | 93074748  | 93074805  | RUNX1T1            |
| chr8 | 93088167  | 93088305  | RUNX1T1            |
| chr8 | 93107230  | 93107424  | RUNX1T1            |
| chr8 | 93107549  | 93107720  | RUNX1T1            |
| chr8 | 93115059  | 93115137  | RUNX1T1            |
| chr8 | 128748814 | 128748894 | MYC                |
| chr8 | 128750468 | 128751290 | MYC                |
| chr8 | 128752616 | 128753229 | MYC                |
| chr9 | 5021962   | 5022238   | JAK2               |
| chr9 | 5029757   | 5029931   | JAK2               |
| chr9 | 5044377   | 5044545   | JAK2               |
| chr9 | 5050660   | 5050856   | JAK2               |
| chr9 | 5054537   | 5054909   | JAK2               |
| chr9 | 5055643   | 5055813   | JAK2               |
| chr9 | 5064857   | 5065065   | JAK2               |
| chr9 | 5066652   | 5066814   | JAK2               |
| chr9 | 5068996   | 5069233   | JAK2               |
| chr9 | 5069899   | 5070077   | JAK2               |
| chr9 | 5072466   | 5072651   | JAK2               |
| chr9 | 5073672   | 5073810   | JAK2               |
| chr9 | 5077427   | 5077605   | JAK2               |
| chr9 | 5078280   | 5078469   | JAK2               |
| chr9 | 5080203   | 5080405   | JAK2               |
| chr9 | 5080507   | 5080708   | JAK2               |
| chr9 | 5081699   | 5081886   | JAK2               |
| chr9 | 5089648   | 5089888   | JAK2               |
| chr9 | 5090420   | 5090595   | JAK2               |
| chr9 | 5090713   | 5090936   | JAK2               |
| chr9 | 5122978   | 5123146   | JAK2               |
| chr9 | 5126307   | 5126471   | JAK2               |
| chr9 | 5126658   | 5126816   | JAK2               |
| chr9 | 8317848   | 8317967   | PTPRD              |
| chr9 | 8319805   | 8319991   | PTPRD              |
| chr9 | 8331556   | 8331761   | PTPRD              |
| chr9 | 8338896   | 8339072   | PTPRD              |
| chr9 | 8340317   | 8340494   | PTPRD              |
| chr9 | 8341064   | 8341293   | PTPRD              |
| chr9 | 8341667   | 8342003   | PTPRD              |
| chr9 | 8375910   | 8376115   | PTPRD              |
| chr9 | 8376581   | 8376751   | PTPRD              |
| chr9 | 8389206   | 8389432   | PTPRD              |
| chr9 | 8404511   | 8404685   | PTPRD              |
| chr9 | 8436566   | 8436714   | PTPRD              |
| chr9 | 8437172   | 8437264   | PTPRD              |
| chr9 | 8449699   | 8449870   | PTPRD              |
| chr9 | 8454554   | 8454619   | PTPRD              |
| chr9 | 8460251   | 8460305   | PTPRD              |
| chr9 | 8460385   | 8460596   | PTPRD              |
| chr9 | 8465440   | 8465700   | PTPRD              |
| chr9 | 8470969   | 8471110   | PTPRD              |
| chr9 | 8484093   | 8484403   | PTPRD              |
| chr9 | 8485201   | 8485352   | PTPRD              |
| chr9 | 8485736   | 8486374   | PTPRD              |
| chr9 | 8486430   | 8486484   | PTPRD              |
| chr9 | 8492836   | 8493004   | PTPRD              |
| chr9 | 8497216   | 8497293   | PTPRD              |
| chr9 | 8499621   | 8499865   | PTPRD              |
| chr9 | 8500728   | 8501084   | PTPRD              |
| chr9 | 8504235   | 8504430   | PTPRD              |
| chr9 | 8507275   | 8507459   | PTPRD              |
| chr9 | 8517822   | 8518454   | PTPRD              |
| chr9 | 8521251   | 8521571   | PTPRD              |
| chr9 | 8523487   | 8523549   | PTPRD              |
| chr9 | 8524753   | 8524815   | PTPRD              |
| chr9 | 8524899   | 8525071   | PTPRD              |
| chr9 | 8525142   | 8525211   | PTPRD              |
| chr9 | 8526601   | 8526669   | PTPRD              |
| chr9 | 8527319   | 8527378   | PTPRD              |
| chr9 | 8528399   | 8528517   | PTPRD              |
| chr9 | 8528555   | 8528804   | PTPRD              |
| chr9 | 8633291   | 8633483   | PTPRD              |
| chr9 | 8636673   | 8636869   | PTPRD              |
| chr9 | 8733754   | 8733868   | PTPRD              |
| chr9 | 21968202  | 21968266  | CDKN2A             |
| chr9 | 21968698  | 21968795  | CDKN2A             |
| chr9 | 21970875  | 21971232  | CDKN2A             |
| chr9 | 21974450  | 21974851  | CDKN2A             |
| chr9 | 21994112  | 21994478  | CDKN2A             |
| chr9 | 22005960  | 22006271  | CDKN2B, CDKN2B-AS1 |
| chr9 | 22008690  | 22008977  | CDKN2B, CDKN2B-AS1 |
| chr9 | 35074079  | 35074238  | FANCG              |
| chr9 | 35074342  | 35074516  | FANCG              |
| chr9 | 35074898  | 35075104  | FANCG              |
| chr9 | 35075250  | 35075347  | FANCG              |
| chr9 | 35075436  | 35075776  | FANCG              |
| chr9 | 35075933  | 35076050  | FANCG              |
| chr9 | 35076403  | 35076605  | FANCG              |
| chr9 | 35076695  | 35076892  | FANCG              |
| chr9 | 35076942  | 35077123  | FANCG              |
| chr9 | 35077235  | 35077421  | FANCG              |
| chr9 | 35078112  | 35078365  | FANCG              |

|      |          |          |         |
|------|----------|----------|---------|
| chr9 | 35078576 | 35078758 | FANCG   |
| chr9 | 35079122 | 35079263 | FANCG   |
| chr9 | 35079412 | 35079546 | FANCG   |
| chr9 | 36840500 | 36840658 | PAX5    |
| chr9 | 36846814 | 36846951 | PAX5    |
| chr9 | 36881975 | 36882127 | PAX5    |
| chr9 | 36923326 | 36923506 | PAX5    |
| chr9 | 36930859 | 36930966 | PAX5    |
| chr9 | 36966520 | 36966746 | PAX5    |
| chr9 | 37002619 | 37002798 | PAX5    |
| chr9 | 37006444 | 37006559 | PAX5    |
| chr9 | 37014968 | 37015216 | PAX5    |
| chr9 | 37020607 | 37020823 | PAX5    |
| chr9 | 37033957 | 37034053 | PAX5    |
| chr9 | 75516098 | 75516221 | ALDH1A1 |
| chr9 | 75520848 | 75520973 | ALDH1A1 |
| chr9 | 75524492 | 75524700 | ALDH1A1 |
| chr9 | 75526848 | 75527063 | ALDH1A1 |
| chr9 | 75531810 | 75532045 | ALDH1A1 |
| chr9 | 75533610 | 75533763 | ALDH1A1 |
| chr9 | 75538909 | 75539073 | ALDH1A1 |
| chr9 | 75540374 | 75540553 | ALDH1A1 |
| chr9 | 75542006 | 75542118 | ALDH1A1 |
| chr9 | 75543782 | 75543962 | ALDH1A1 |
| chr9 | 75545769 | 75545960 | ALDH1A1 |
| chr9 | 75555038 | 75555193 | ALDH1A1 |
| chr9 | 75567825 | 75567983 | ALDH1A1 |
| chr9 | 80336213 | 80336454 | GNAQ    |
| chr9 | 80343404 | 80343608 | GNAQ    |
| chr9 | 80409353 | 80409533 | GNAQ    |
| chr9 | 80412410 | 80412589 | GNAQ    |
| chr9 | 80430506 | 80430711 | GNAQ    |
| chr9 | 80537051 | 80537286 | GNAQ    |
| chr9 | 80645990 | 80646176 | GNAQ    |
| chr9 | 87285638 | 87285900 | NTRK2   |
| chr9 | 87317048 | 87317173 | NTRK2   |
| chr9 | 87317237 | 87317359 | NTRK2   |
| chr9 | 87322733 | 87322852 | NTRK2   |
| chr9 | 87325526 | 87325731 | NTRK2   |
| chr9 | 87338462 | 87338649 | NTRK2   |
| chr9 | 87339113 | 87339296 | NTRK2   |
| chr9 | 87342543 | 87342899 | NTRK2   |
| chr9 | 87356781 | 87356867 | NTRK2   |
| chr9 | 87359862 | 87360013 | NTRK2   |
| chr9 | 87366875 | 87367025 | NTRK2   |
| chr9 | 87425431 | 87425519 | NTRK2   |
| chr9 | 87475929 | 87476027 | NTRK2   |
| chr9 | 87482132 | 87482371 | NTRK2   |
| chr9 | 87486678 | 87486757 | NTRK2   |
| chr9 | 87549051 | 87549232 | NTRK2   |
| chr9 | 87563351 | 87563574 | NTRK2   |
| chr9 | 87570172 | 87570457 | NTRK2   |
| chr9 | 87635095 | 87635304 | NTRK2   |
| chr9 | 87636141 | 87636377 | NTRK2   |
| chr9 | 93606155 | 93606622 | SYK     |
| chr9 | 93607690 | 93607901 | SYK     |
| chr9 | 93624462 | 93624651 | SYK     |
| chr9 | 93626845 | 93626974 | SYK     |
| chr9 | 93627304 | 93627404 | SYK     |
| chr9 | 93629387 | 93629506 | SYK     |
| chr9 | 93636460 | 93636598 | SYK     |
| chr9 | 93636928 | 93637156 | SYK     |
| chr9 | 93639827 | 93640087 | SYK     |
| chr9 | 93641020 | 93641260 | SYK     |
| chr9 | 93650005 | 93650196 | SYK     |
| chr9 | 93650771 | 93650934 | SYK     |
| chr9 | 93657784 | 93657907 | SYK     |
| chr9 | 97863963 | 97864157 | FANCC   |
| chr9 | 97869322 | 97869576 | FANCC   |
| chr9 | 97873452 | 97873652 | FANCC   |
| chr9 | 97873719 | 97873944 | FANCC   |
| chr9 | 97876885 | 97877017 | FANCC   |
| chr9 | 97879571 | 97879697 | FANCC   |
| chr9 | 97887342 | 97887492 | FANCC   |
| chr9 | 97888785 | 97888888 | FANCC   |
| chr9 | 97897602 | 97897809 | FANCC   |
| chr9 | 97912179 | 97912394 | FANCC   |
| chr9 | 97933335 | 97933450 | FANCC   |
| chr9 | 97934293 | 97934454 | FANCC   |
| chr9 | 98002905 | 98003050 | FANCC   |
| chr9 | 98009688 | 98009823 | FANCC   |
| chr9 | 98011383 | 98011598 | FANCC   |
| chr9 | 98208639 | 98208698 | PTCH1   |
| chr9 | 98209167 | 98209758 | PTCH1   |
| chr9 | 98211325 | 98211630 | PTCH1   |
| chr9 | 98212097 | 98212247 | PTCH1   |
| chr9 | 98215734 | 98215927 | PTCH1   |
| chr9 | 98218532 | 98218720 | PTCH1   |
| chr9 | 98220269 | 98220600 | PTCH1   |
| chr9 | 98221856 | 98222090 | PTCH1   |
| chr9 | 98224112 | 98224305 | PTCH1   |
| chr9 | 98229372 | 98229732 | PTCH1   |
| chr9 | 98231007 | 98231460 | PTCH1   |
| chr9 | 98232069 | 98232238 | PTCH1   |
| chr9 | 98236268 | 98236354 | PTCH1   |
| chr9 | 98238290 | 98238466 | PTCH1   |

|       |           |           |                 |
|-------|-----------|-----------|-----------------|
| chr9  | 98239015  | 98239164  | PTCH1           |
| chr9  | 98239803  | 98240009  | PTCH1           |
| chr9  | 98240311  | 98240493  | PTCH1           |
| chr9  | 98241256  | 98241454  | PTCH1           |
| chr9  | 98242225  | 98242397  | PTCH1           |
| chr9  | 98242646  | 98242895  | PTCH1           |
| chr9  | 98244205  | 98244347  | PTCH1           |
| chr9  | 98244390  | 98244510  | PTCH1           |
| chr9  | 98247941  | 98248181  | PTCH1           |
| chr9  | 98268663  | 98268906  | PTCH1           |
| chr9  | 98270417  | 98270668  | PTCH1           |
| chr9  | 98278725  | 98278778  | PTCH1           |
| chr9  | 98278879  | 98279127  | PTCH1           |
| chr9  | 133589681 | 133589867 |                 |
| chr9  | 133709394 | 133709456 |                 |
| chr9  | 133710235 | 133710294 |                 |
| chr9  | 133710674 | 133710937 | ABL1            |
| chr9  | 133729425 | 133729649 | ABL1            |
| chr9  | 133730162 | 133730508 | ABL1            |
| chr9  | 133738124 | 133738447 | ABL1            |
| chr9  | 133747490 | 133747625 | ABL1            |
| chr9  | 133748221 | 133748449 | ABL1            |
| chr9  | 133750229 | 133750464 | ABL1            |
| chr9  | 133753776 | 133753979 | ABL1            |
| chr9  | 133755429 | 133755569 | ABL1            |
| chr9  | 133755861 | 133756076 | ABL1            |
| chr9  | 133759330 | 133761095 | ABL1            |
| chr9  | 135771596 | 135772166 | TSC1            |
| chr9  | 135772545 | 135772757 | TSC1            |
| chr9  | 135772784 | 135773022 | TSC1            |
| chr9  | 135776076 | 135776249 | TSC1            |
| chr9  | 135776950 | 135777111 | TSC1            |
| chr9  | 135777966 | 135778199 | TSC1            |
| chr9  | 135779012 | 135779229 | TSC1            |
| chr9  | 135779772 | 135779866 | TSC1            |
| chr9  | 135780942 | 135781551 | TSC1            |
| chr9  | 135782092 | 135782247 | TSC1            |
| chr9  | 135782662 | 135782782 | TSC1            |
| chr9  | 135785932 | 135786104 | TSC1            |
| chr9  | 135786363 | 135786525 | TSC1            |
| chr9  | 135786742 | 135786980 | TSC1            |
| chr9  | 135787643 | 135787869 | TSC1            |
| chr9  | 135796724 | 135796848 | TSC1            |
| chr9  | 135797180 | 135797385 | TSC1            |
| chr9  | 135798709 | 135798904 | TSC1            |
| chr9  | 135800948 | 135801151 | TSC1            |
| chr9  | 135802562 | 135802716 | TSC1            |
| chr9  | 135804128 | 135804284 | TSC1            |
| chr9  | 139390497 | 139392035 | NOTCH1          |
| chr9  | 139393325 | 139393473 | NOTCH1          |
| chr9  | 139393538 | 139393736 | NOTCH1          |
| chr9  | 139394978 | 139395324 | NOTCH1          |
| chr9  | 139396174 | 139396390 | NOTCH1          |
| chr9  | 139396427 | 139396565 | NOTCH1          |
| chr9  | 139396698 | 139396965 | NOTCH1          |
| chr9  | 139397608 | 139397807 | NOTCH1          |
| chr9  | 139399099 | 139399581 | NOTCH1          |
| chr9  | 139399736 | 139400358 | NOTCH1          |
| chr9  | 139400953 | 139401116 | NOTCH1          |
| chr9  | 139401142 | 139401450 | NOTCH1          |
| chr9  | 139401731 | 139401914 | NOTCH1          |
| chr9  | 139402381 | 139402616 | NOTCH1          |
| chr9  | 139402658 | 139402862 | NOTCH1          |
| chr9  | 139403296 | 139403548 | NOTCH1          |
| chr9  | 139404159 | 139404438 | NOTCH1          |
| chr9  | 139405079 | 139405282 | NOTCH1          |
| chr9  | 139405578 | 139405748 | NOTCH1          |
| chr9  | 139407447 | 139407611 | NOTCH1          |
| chr9  | 139407818 | 139408014 | NOTCH1          |
| chr9  | 139408936 | 139409179 | NOTCH1          |
| chr9  | 139409716 | 139409877 | NOTCH1          |
| chr9  | 139409909 | 139410193 | NOTCH1          |
| chr9  | 139410407 | 139410571 | NOTCH1          |
| chr9  | 139411698 | 139411862 | NOTCH1          |
| chr9  | 139412178 | 139412414 | NOTCH1          |
| chr9  | 139412563 | 139412769 | NOTCH1          |
| chr9  | 139413017 | 139413301 | NOTCH1          |
| chr9  | 139413869 | 139414042 | MIR4673, NOTCH1 |
| chr9  | 139417276 | 139417665 | NOTCH1          |
| chr9  | 139418143 | 139418456 | NOTCH1          |
| chr9  | 139438450 | 139438579 | NOTCH1          |
| chr9  | 139440152 | 139440263 | NOTCH1          |
| chr10 | 8097593   | 8097884   | GATA3           |
| chr10 | 8100242   | 8100829   | GATA3           |
| chr10 | 8105930   | 8106126   | GATA3           |
| chr10 | 8111410   | 8111588   | GATA3           |
| chr10 | 8115676   | 8116011   | GATA3           |
| chr10 | 43572681  | 43572804  | RET             |
| chr10 | 43595881  | 43596195  | RET             |
| chr10 | 43597764  | 43598102  | RET             |
| chr10 | 43600374  | 43600666  | RET             |
| chr10 | 43601798  | 43602044  | RET             |
| chr10 | 43604453  | 43604703  | RET             |
| chr10 | 43606629  | 43606938  | RET             |
| chr10 | 43607521  | 43607697  | RET             |
| chr10 | 43608275  | 43608436  | RET             |

|       |           |           |         |
|-------|-----------|-----------|---------|
| chr10 | 43608978  | 43609148  | RET     |
| chr10 | 43609902  | 43610209  | RET     |
| chr10 | 43612006  | 43612204  | RET     |
| chr10 | 43613795  | 43613953  | RET     |
| chr10 | 43614953  | 43615218  | RET     |
| chr10 | 43615503  | 43615676  | RET     |
| chr10 | 43617368  | 43617489  | RET     |
| chr10 | 43619093  | 43619281  | RET     |
| chr10 | 43620305  | 43620455  | RET     |
| chr10 | 43621997  | 43622227  | RET     |
| chr10 | 43623534  | 43623742  | RET     |
| chr10 | 45869702  | 45869902  | ALOX5   |
| chr10 | 45877905  | 45878154  | ALOX5   |
| chr10 | 45891277  | 45891409  | ALOX5   |
| chr10 | 45907613  | 45907786  | ALOX5   |
| chr10 | 45919463  | 45919620  | ALOX5   |
| chr10 | 45920382  | 45920605  | ALOX5   |
| chr10 | 45924040  | 45924237  | ALOX5   |
| chr10 | 45935852  | 45936106  | ALOX5   |
| chr10 | 45936766  | 45936903  | ALOX5   |
| chr10 | 45938460  | 45938689  | ALOX5   |
| chr10 | 45938838  | 45939010  | ALOX5   |
| chr10 | 45939150  | 45939301  | ALOX5   |
| chr10 | 45939538  | 45939759  | ALOX5   |
| chr10 | 45940930  | 45941160  | ALOX5   |
| chr10 | 89624201  | 89624330  | PTEN    |
| chr10 | 89653756  | 89653891  | PTEN    |
| chr10 | 89685244  | 89685339  | PTEN    |
| chr10 | 89690777  | 89690871  | PTEN    |
| chr10 | 89692744  | 89693033  | PTEN    |
| chr10 | 89711849  | 89712041  | PTEN    |
| chr10 | 89717584  | 89717801  | PTEN    |
| chr10 | 89720625  | 89720900  | PTEN    |
| chr10 | 89725018  | 89725254  | PTEN    |
| chr10 | 93558422  | 93558671  | TNKS2   |
| chr10 | 93572714  | 93572989  | TNKS2   |
| chr10 | 93576865  | 93577011  | TNKS2   |
| chr10 | 93579001  | 93579088  | TNKS2   |
| chr10 | 93579213  | 93579339  | TNKS2   |
| chr10 | 93579670  | 93579815  | TNKS2   |
| chr10 | 93582027  | 93582144  | TNKS2   |
| chr10 | 93586748  | 93586985  | TNKS2   |
| chr10 | 93588016  | 93588188  | TNKS2   |
| chr10 | 93590654  | 93590796  | TNKS2   |
| chr10 | 93590834  | 93590963  | TNKS2   |
| chr10 | 93593584  | 93593806  | TNKS2   |
| chr10 | 93596650  | 93596780  | TNKS2   |
| chr10 | 93600292  | 93600488  | TNKS2   |
| chr10 | 93601014  | 93601230  | TNKS2   |
| chr10 | 93601903  | 93602173  | TNKS2   |
| chr10 | 93604650  | 93604810  | TNKS2   |
| chr10 | 93605483  | 93605722  | TNKS2   |
| chr10 | 93608114  | 93608417  | TNKS2   |
| chr10 | 93609243  | 93609376  | TNKS2   |
| chr10 | 93610947  | 93611118  | TNKS2   |
| chr10 | 93614760  | 93614908  | TNKS2   |
| chr10 | 93615345  | 93615470  | TNKS2   |
| chr10 | 93617156  | 93617312  | TNKS2   |
| chr10 | 93619193  | 93619430  | TNKS2   |
| chr10 | 93621730  | 93621937  | TNKS2   |
| chr10 | 93622668  | 93622781  | TNKS2   |
| chr10 | 96522437  | 96522655  | CYP2C19 |
| chr10 | 96534789  | 96535002  | CYP2C19 |
| chr10 | 96535121  | 96535321  | CYP2C19 |
| chr10 | 96540230  | 96540441  | CYP2C19 |
| chr10 | 96541552  | 96541779  | CYP2C19 |
| chr10 | 96580227  | 96580419  | CYP2C19 |
| chr10 | 96602568  | 96602806  | CYP2C19 |
| chr10 | 96609648  | 96609840  | CYP2C19 |
| chr10 | 96612464  | 96612696  | CYP2C19 |
| chr10 | 96698414  | 96698632  | CYP2C9  |
| chr10 | 96701589  | 96701802  | CYP2C9  |
| chr10 | 96701923  | 96702123  | CYP2C9  |
| chr10 | 96707510  | 96707721  | CYP2C9  |
| chr10 | 96708839  | 96709066  | CYP2C9  |
| chr10 | 96731835  | 96732027  | CYP2C9  |
| chr10 | 96740914  | 96741152  | CYP2C9  |
| chr10 | 96745764  | 96745956  | CYP2C9  |
| chr10 | 96748578  | 96748810  | CYP2C9  |
| chr10 | 96749200  | 96749335  |         |
| chr10 | 96796859  | 96797091  | CYP2C8  |
| chr10 | 96798628  | 96798820  | CYP2C8  |
| chr10 | 96800659  | 96800742  | CYP2C8  |
| chr10 | 96802621  | 96802859  | CYP2C8  |
| chr10 | 96805541  | 96805733  | CYP2C8  |
| chr10 | 96818066  | 96818293  | CYP2C8  |
| chr10 | 96824531  | 96824742  | CYP2C8  |
| chr10 | 96826939  | 96827473  | CYP2C8  |
| chr10 | 96828928  | 96829184  | CYP2C8  |
| chr10 | 104263884 | 104264116 | SUFU    |
| chr10 | 104268900 | 104269085 | SUFU    |
| chr10 | 104309701 | 104309888 | SUFU    |
| chr10 | 104352313 | 104352506 | SUFU    |
| chr10 | 104353367 | 104353503 | SUFU    |
| chr10 | 104353724 | 104353847 | SUFU    |
| chr10 | 104356871 | 104357075 | SUFU    |

|       |           |           |              |
|-------|-----------|-----------|--------------|
| chr10 | 104359164 | 104359326 | SUFU         |
| chr10 | 104374999 | 104375184 | SUFU         |
| chr10 | 104377021 | 104377210 | SUFU         |
| chr10 | 104378797 | 104378853 | SUFU         |
| chr10 | 104386906 | 104387025 | SUFU         |
| chr10 | 104389797 | 104389937 | SUFU         |
| chr10 | 104849403 | 104849690 | CNNM2, NT5C2 |
| chr10 | 104850342 | 104850569 | NT5C2        |
| chr10 | 104850667 | 104850778 | NT5C2        |
| chr10 | 104851295 | 104851397 | NT5C2        |
| chr10 | 104852870 | 104853091 | NT5C2        |
| chr10 | 104853703 | 104853820 | NT5C2        |
| chr10 | 104854079 | 104854237 | NT5C2        |
| chr10 | 104855670 | 104855762 | NT5C2        |
| chr10 | 104857022 | 104857156 | NT5C2        |
| chr10 | 104857775 | 104857870 | NT5C2        |
| chr10 | 104858662 | 104858766 | NT5C2        |
| chr10 | 104859657 | 104859801 | NT5C2        |
| chr10 | 104860394 | 104860524 | NT5C2        |
| chr10 | 104860776 | 104860884 | NT5C2        |
| chr10 | 104860966 | 104861108 | NT5C2        |
| chr10 | 104865089 | 104865163 | NT5C2        |
| chr10 | 104865437 | 104865583 | NT5C2        |
| chr10 | 104866320 | 104866488 | NT5C2        |
| chr10 | 104899137 | 104899261 | NT5C2        |
| chr10 | 104913022 | 104913086 | NT5C2        |
| chr10 | 104934589 | 104934740 | NT5C2        |
| chr10 | 115803866 | 115805350 | ADRB1        |
| chr10 | 123239069 | 123239209 | FGFR2        |
| chr10 | 123239345 | 123239652 | FGFR2        |
| chr10 | 123241660 | 123241716 | FGFR2        |
| chr10 | 123243186 | 123243342 | FGFR2        |
| chr10 | 123244883 | 123245071 | FGFR2        |
| chr10 | 123246842 | 123246963 | FGFR2        |
| chr10 | 123247479 | 123247652 | FGFR2        |
| chr10 | 123256020 | 123256261 | FGFR2        |
| chr10 | 123257983 | 123258144 | FGFR2        |
| chr10 | 123260314 | 123260486 | FGFR2        |
| chr10 | 123263278 | 123263480 | FGFR2        |
| chr10 | 123274605 | 123274858 | FGFR2        |
| chr10 | 123276807 | 123277002 | FGFR2        |
| chr10 | 123277535 | 123277594 | FGFR2        |
| chr10 | 123278170 | 123278368 | FGFR2        |
| chr10 | 123279467 | 123279708 | FGFR2        |
| chr10 | 123297882 | 123297949 | FGFR2        |
| chr10 | 123298080 | 123298254 | FGFR2        |
| chr10 | 123310778 | 123310998 | FGFR2        |
| chr10 | 123323990 | 123324118 | FGFR2        |
| chr10 | 123324926 | 123325243 | FGFR2        |
| chr10 | 123353197 | 123353356 | FGFR2        |
| chr10 | 135340874 | 135341101 | CYP2E1, SPRN |
| chr10 | 135341959 | 135342169 | CYP2E1, SPRN |
| chr10 | 135345063 | 135345263 | CYP2E1, SPRN |
| chr10 | 135345602 | 135345813 | CYP2E1, SPRN |
| chr10 | 135346170 | 135346397 | CYP2E1, SPRN |
| chr10 | 135347234 | 135347426 | CYP2E1, SPRN |
| chr10 | 135350541 | 135350779 | CYP2E1, SPRN |
| chr10 | 135351229 | 135351421 | CYP2E1, SPRN |
| chr10 | 135352258 | 135352493 | CYP2E1, SPRN |
| chr11 | 532610    | 532780    | HRAS         |
| chr11 | 533270    | 533383    | HRAS         |
| chr11 | 533427    | 533637    | HRAS         |
| chr11 | 533740    | 533969    | HRAS         |
| chr11 | 534186    | 534347    | HRAS         |
| chr11 | 8246137   | 8246293   | LMO1         |
| chr11 | 8248496   | 8248672   | LMO1         |
| chr11 | 8251812   | 8252076   | LMO1         |
| chr11 | 8284859   | 8284934   | LMO1         |
| chr11 | 8289948   | 8290020   | LMO1         |
| chr11 | 17408440  | 17409663  | KCNJ11       |
| chr11 | 22646206  | 22647381  | FANCF        |
| chr11 | 32410578  | 32410750  | WT1          |
| chr11 | 32413492  | 32413635  | WT1          |
| chr11 | 32414186  | 32414326  | WT1          |
| chr11 | 32417777  | 32417978  | WT1          |
| chr11 | 32421468  | 32421615  | WT1          |
| chr11 | 32438010  | 32438111  | WT1          |
| chr11 | 32439097  | 32439225  | WT1          |
| chr11 | 32449476  | 32449629  | WT1          |
| chr11 | 32450017  | 32450190  | WT1          |
| chr11 | 32452050  | 32452110  | WT1          |
| chr11 | 32456220  | 32456916  | WT1          |
| chr11 | 60229822  | 60230031  | MS4A1        |
| chr11 | 60230449  | 60230619  | MS4A1        |
| chr11 | 60231735  | 60231842  | MS4A1        |
| chr11 | 60233368  | 60233655  | MS4A1        |
| chr11 | 60234406  | 60234558  | MS4A1        |
| chr11 | 60235697  | 60235966  | MS4A1        |
| chr11 | 64571780  | 64572313  | MEN1         |
| chr11 | 64572480  | 64572695  | MEN1         |
| chr11 | 64573081  | 64573267  | MEN1         |
| chr11 | 64573678  | 64573865  | MEN1         |
| chr11 | 64574457  | 64574595  | MEN1         |
| chr11 | 64574625  | 64574716  | MEN1         |
| chr11 | 64574998  | 64575177  | MEN1         |
| chr11 | 64575337  | 64575596  | MEN1         |



|       |           |           |               |
|-------|-----------|-----------|---------------|
| chr11 | 64577096  | 64577606  | MEN1          |
| chr11 | 67351289  | 67351340  | GSTP1         |
| chr11 | 67351579  | 67351665  | GSTP1         |
| chr11 | 67351909  | 67352066  | GSTP1         |
| chr11 | 67352130  | 67352268  | GSTP1         |
| chr11 | 67352583  | 67352737  | GSTP1         |
| chr11 | 67353549  | 67353707  | GSTP1         |
| chr11 | 67353834  | 67354073  | GSTP1         |
| chr11 | 69456056  | 69456304  | CCND1         |
| chr11 | 69457773  | 69458039  | CCND1         |
| chr11 | 69458574  | 69458784  | CCND1         |
| chr11 | 69462736  | 69462935  | CCND1         |
| chr11 | 69465860  | 69466075  | CCND1         |
| chr11 | 94153265  | 94153372  | MRE11         |
| chr11 | 94163051  | 94163177  | MRE11         |
| chr11 | 94168972  | 94169090  | MRE11         |
| chr11 | 94170317  | 94170426  | MRE11         |
| chr11 | 94178950  | 94179084  | MRE11         |
| chr11 | 94180359  | 94180629  | MRE11         |
| chr11 | 94189416  | 94189529  | MRE11         |
| chr11 | 94192548  | 94192772  | MRE11         |
| chr11 | 94194076  | 94194227  | MRE11         |
| chr11 | 94197253  | 94197430  | MRE11         |
| chr11 | 94200953  | 94201084  | MRE11         |
| chr11 | 94203611  | 94203833  | MRE11         |
| chr11 | 94204714  | 94204950  | MRE11         |
| chr11 | 94208753  | 94208810  | MRE11         |
| chr11 | 94209429  | 94209594  | MRE11         |
| chr11 | 94211875  | 94212067  | MRE11         |
| chr11 | 94212814  | 94212952  | MRE11         |
| chr11 | 94219064  | 94219275  | MRE11         |
| chr11 | 94223973  | 94224156  | MRE11         |
| chr11 | 94225782  | 94225861  | MRE11         |
| chr11 | 94225922  | 94225992  | MRE11         |
| chr11 | 100909821 | 100910027 | PGR           |
| chr11 | 100912650 | 100912858 | PGR           |
| chr11 | 100920634 | 100920815 | PGR           |
| chr11 | 100921654 | 100921705 | PGR           |
| chr11 | 100922129 | 100922324 | PGR           |
| chr11 | 100933152 | 100933508 | PGR           |
| chr11 | 100962465 | 100962632 | PGR           |
| chr11 | 100996712 | 100996914 | PGR           |
| chr11 | 100998139 | 10099826  | PGR           |
| chr11 | 106558249 | 106558507 | GUCY1A2       |
| chr11 | 106579212 | 106579417 | GUCY1A2       |
| chr11 | 106617251 | 106617394 | GUCY1A2       |
| chr11 | 106647139 | 106647333 | GUCY1A2       |
| chr11 | 106680693 | 106681229 | GUCY1A2       |
| chr11 | 106807350 | 106807463 | GUCY1A2       |
| chr11 | 106810160 | 106810929 | GUCY1A2       |
| chr11 | 106849319 | 106849491 | GUCY1A2       |
| chr11 | 106856770 | 106856882 | GUCY1A2       |
| chr11 | 106888453 | 106888806 | GUCY1A2       |
| chr11 | 108098326 | 108098448 | ATM           |
| chr11 | 108098477 | 108098640 | ATM           |
| chr11 | 108099879 | 108100075 | ATM           |
| chr11 | 108106371 | 108106586 | ATM           |
| chr11 | 108114654 | 108114870 | ATM           |
| chr11 | 108115489 | 108115778 | ATM           |
| chr11 | 108117665 | 108117879 | ATM           |
| chr11 | 108119634 | 108119854 | ATM           |
| chr11 | 108121402 | 108121824 | ATM           |
| chr11 | 108122538 | 108122783 | ATM           |
| chr11 | 108123518 | 108123664 | ATM           |
| chr11 | 108124515 | 108124791 | ATM           |
| chr11 | 108126916 | 108127092 | ATM           |
| chr11 | 108128182 | 108128358 | ATM           |
| chr11 | 108129687 | 108129827 | ATM           |
| chr11 | 108137872 | 108138094 | ATM           |
| chr11 | 108139111 | 108139361 | ATM           |
| chr11 | 108141765 | 108141898 | ATM           |
| chr11 | 108141952 | 108142158 | ATM           |
| chr11 | 108143233 | 108143359 | ATM           |
| chr11 | 108143423 | 108143604 | ATM           |
| chr11 | 108150192 | 108150360 | ATM           |
| chr11 | 108151696 | 108151920 | ATM           |
| chr11 | 108153411 | 108153631 | ATM           |
| chr11 | 108154928 | 108155225 | ATM           |
| chr11 | 108158301 | 108158467 | ATM           |
| chr11 | 108159678 | 108159855 | ATM           |
| chr11 | 108160303 | 108160553 | ATM           |
| chr11 | 108163320 | 108163545 | ATM           |
| chr11 | 108164014 | 108164229 | ATM           |
| chr11 | 108165628 | 108165811 | ATM           |
| chr11 | 108167988 | 108168134 | ATM           |
| chr11 | 108170415 | 108170637 | ATM           |
| chr11 | 108172349 | 108172541 | ATM           |
| chr11 | 108173554 | 108173781 | ATM           |
| chr11 | 108175376 | 108175604 | ATM           |
| chr11 | 108178598 | 108178736 | ATM           |
| chr11 | 108180861 | 108181067 | ATM, C11ORF65 |
| chr11 | 108183112 | 108183250 | ATM, C11ORF65 |
| chr11 | 108186524 | 108186663 | ATM, C11ORF65 |
| chr11 | 108186712 | 108186865 | ATM, C11ORF65 |
| chr11 | 108188074 | 108188273 | ATM, C11ORF65 |
| chr11 | 108190655 | 108190810 | ATM, C11ORF65 |

|       |           |           |               |
|-------|-----------|-----------|---------------|
| chr11 | 108192002 | 108192172 | ATM, C11ORF65 |
| chr11 | 108196011 | 108196296 | ATM, C11ORF65 |
| chr11 | 108196759 | 108196977 | ATM, C11ORF65 |
| chr11 | 108198346 | 108198510 | ATM, C11ORF65 |
| chr11 | 108199722 | 108199990 | ATM, C11ORF65 |
| chr11 | 108200915 | 108201173 | ATM, C11ORF65 |
| chr11 | 108202145 | 108202309 | ATM, C11ORF65 |
| chr11 | 108202580 | 108202789 | ATM, C11ORF65 |
| chr11 | 108203463 | 108203652 | ATM, C11ORF65 |
| chr11 | 108204587 | 108204720 | ATM, C11ORF65 |
| chr11 | 108205670 | 108205861 | ATM, C11ORF65 |
| chr11 | 108206546 | 108206713 | ATM, C11ORF65 |
| chr11 | 108213923 | 108214123 | ATM, C11ORF65 |
| chr11 | 108216444 | 108216660 | ATM, C11ORF65 |
| chr11 | 108217980 | 108218117 | ATM, C11ORF65 |
| chr11 | 108224467 | 108224632 | ATM, C11ORF65 |
| chr11 | 108225512 | 108225626 | ATM, C11ORF65 |
| chr11 | 108235783 | 108235970 | ATM, C11ORF65 |
| chr11 | 108236026 | 108236260 | ATM, C11ORF65 |
| chr11 | 113281423 | 113281667 | DRD2          |
| chr11 | 113283252 | 113283630 | DRD2          |
| chr11 | 113284031 | 113284087 | DRD2          |
| chr11 | 113285071 | 113285208 | DRD2          |
| chr11 | 113286117 | 113286358 | DRD2          |
| chr11 | 113287559 | 113287746 | DRD2          |
| chr11 | 113288723 | 113288883 | DRD2          |
| chr11 | 113295059 | 113295398 | DRD2          |
| chr11 | 118307202 | 118307684 | KMT2A         |
| chr11 | 118309713 | 118309862 | KMT2A         |
| chr11 | 118339435 | 118339584 | KMT2A         |
| chr11 | 118342351 | 118345055 | KMT2A         |
| chr11 | 118347494 | 118347722 | KMT2A         |
| chr11 | 118348656 | 118348941 | KMT2A         |
| chr11 | 118350863 | 118350978 | KMT2A         |
| chr11 | 118352404 | 118352832 | KMT2A         |
| chr11 | 118353111 | 118353235 | KMT2A         |
| chr11 | 118354872 | 118355087 | KMT2A         |
| chr11 | 118355551 | 118355715 | KMT2A         |
| chr11 | 118359183 | 118359239 | KMT2A         |
| chr11 | 118359303 | 118359500 | KMT2A         |
| chr11 | 118360481 | 118360627 | KMT2A         |
| chr11 | 118360818 | 118360989 | KMT2A         |
| chr11 | 118361885 | 118362058 | KMT2A         |
| chr11 | 118362433 | 118362668 | KMT2A         |
| chr11 | 118363746 | 118363970 | KMT2A         |
| chr11 | 118364977 | 118365138 | KMT2A         |
| chr11 | 118365383 | 118365507 | KMT2A         |
| chr11 | 118366389 | 118366633 | KMT2A         |
| chr11 | 118366950 | 118367107 | KMT2A         |
| chr11 | 118368625 | 118368813 | KMT2A         |
| chr11 | 118369059 | 118369268 | KMT2A         |
| chr11 | 118369992 | 118370160 | KMT2A         |
| chr11 | 118370524 | 118370653 | KMT2A         |
| chr11 | 118371676 | 118371887 | KMT2A         |
| chr11 | 118372361 | 118372597 | KMT2A         |
| chr11 | 118373087 | 118373386 | KMT2A         |
| chr11 | 118378218 | 118378349 | KMT2A         |
| chr11 | 118379825 | 118379940 | KMT2A         |
| chr11 | 118380637 | 118380858 | KMT2A         |
| chr11 | 118382640 | 118382765 | KMT2A         |
| chr11 | 118390307 | 118390532 | KMT2A         |
| chr11 | 118390646 | 118390804 | KMT2A         |
| chr11 | 118391491 | 118391625 | KMT2A         |
| chr11 | 118391977 | 118392157 | KMT2A         |
| chr11 | 118392586 | 118392912 | KMT2A         |
| chr11 | 119077102 | 119077347 | CBL           |
| chr11 | 119103132 | 119103430 | CBL           |
| chr11 | 119142419 | 119142616 | CBL           |
| chr11 | 119144552 | 119144759 | CBL           |
| chr11 | 119145516 | 119145688 | CBL           |
| chr11 | 119146681 | 119146869 | CBL           |
| chr11 | 119148441 | 119148579 | CBL           |
| chr11 | 119148850 | 119149032 | CBL           |
| chr11 | 119149194 | 119149448 | CBL           |
| chr11 | 119155653 | 119155835 | CBL           |
| chr11 | 119155873 | 119156301 | CBL           |
| chr11 | 119158536 | 119158681 | CBL           |
| chr11 | 119167602 | 119167769 | CBL           |
| chr11 | 119168068 | 119168216 | CBL           |
| chr11 | 119169042 | 119169275 | CBL           |
| chr11 | 119170179 | 119170516 | CBL           |
| chr11 | 125495630 | 125495932 | CHEK1         |
| chr11 | 125496618 | 125496753 | CHEK1         |
| chr11 | 125497476 | 125497750 | CHEK1         |
| chr11 | 125499101 | 125499216 | CHEK1         |
| chr11 | 125499260 | 125499380 | CHEK1         |
| chr11 | 125503032 | 125503271 | CHEK1         |
| chr11 | 125505298 | 125505453 | CHEK1         |
| chr11 | 125507318 | 125507464 | CHEK1         |
| chr11 | 125513661 | 125513820 | CHEK1         |
| chr11 | 125513960 | 125514188 | CHEK1         |
| chr11 | 125514381 | 125514563 | CHEK1         |
| chr11 | 125523615 | 125523767 | CHEK1         |
| chr11 | 125525094 | 125525240 | CHEK1         |
| chr12 | 394596    | 394853    | KDM5A         |
| chr12 | 395303    | 395398    | KDM5A         |

|       |          |          |                  |
|-------|----------|----------|------------------|
| chr12 | 401899   | 402360   | KDM5A            |
| chr12 | 404713   | 404984   | KDM5A            |
| chr12 | 406181   | 406391   | KDM5A            |
| chr12 | 416086   | 416280   | KDM5A            |
| chr12 | 416594   | 417196   | KDM5A            |
| chr12 | 418943   | 419155   | KDM5A            |
| chr12 | 420025   | 420255   | KDM5A            |
| chr12 | 422196   | 422385   | KDM5A            |
| chr12 | 427246   | 427652   | KDM5A            |
| chr12 | 430135   | 430300   | KDM5A            |
| chr12 | 431557   | 431758   | KDM5A            |
| chr12 | 432222   | 432397   | KDM5A            |
| chr12 | 432740   | 432972   | KDM5A            |
| chr12 | 437975   | 438220   | KDM5A            |
| chr12 | 440959   | 441129   | KDM5A            |
| chr12 | 442627   | 442840   | KDM5A            |
| chr12 | 443381   | 443613   | KDM5A            |
| chr12 | 459761   | 459970   | KDM5A            |
| chr12 | 461345   | 461515   | KDM5A            |
| chr12 | 463216   | 463425   | KDM5A            |
| chr12 | 464298   | 464440   | KDM5A            |
| chr12 | 465572   | 465728   | KDM5A            |
| chr12 | 472103   | 472288   | KDM5A            |
| chr12 | 475074   | 475295   | KDM5A            |
| chr12 | 493171   | 493344   | KDM5A            |
| chr12 | 495037   | 495165   | KDM5A            |
| chr12 | 498067   | 498282   | KDM5A            |
| chr12 | 4383181  | 4383426  | CCND2, CCND2-AS1 |
| chr12 | 4385145  | 4385411  | CCND2, CCND2-AS1 |
| chr12 | 4387900  | 4388110  | CCND2            |
| chr12 | 4397982  | 4398181  | CCND2            |
| chr12 | 4409000  | 4409200  | CCND2            |
| chr12 | 6679816  | 6679884  | CHD4             |
| chr12 | 6680009  | 6680223  | CHD4             |
| chr12 | 6682214  | 6682460  | CHD4             |
| chr12 | 6686925  | 6687108  | CHD4             |
| chr12 | 6687169  | 6687328  | CHD4             |
| chr12 | 6687549  | 6687737  | CHD4             |
| chr12 | 6687986  | 6688108  | CHD4             |
| chr12 | 6690184  | 6690364  | CHD4             |
| chr12 | 6690431  | 6690579  | CHD4             |
| chr12 | 6690789  | 6691005  | CHD4             |
| chr12 | 6691277  | 6691472  | CHD4             |
| chr12 | 6691755  | 6691939  | CHD4             |
| chr12 | 6691988  | 6692127  | CHD4             |
| chr12 | 6692167  | 6692569  | CHD4             |
| chr12 | 6696524  | 6696750  | CHD4             |
| chr12 | 6696852  | 6697140  | CHD4             |
| chr12 | 6697438  | 6697613  | CHD4             |
| chr12 | 6700606  | 6700774  | CHD4             |
| chr12 | 6700834  | 6701016  | CHD4             |
| chr12 | 6701056  | 6701248  | CHD4             |
| chr12 | 6701533  | 6701757  | CHD4             |
| chr12 | 6701836  | 6702008  | CHD4             |
| chr12 | 6702231  | 6702419  | CHD4             |
| chr12 | 6702556  | 6702807  | CHD4             |
| chr12 | 6703599  | 6703841  | CHD4             |
| chr12 | 6704474  | 6704621  | CHD4             |
| chr12 | 6705146  | 6705328  | CHD4             |
| chr12 | 6707034  | 6707290  | CHD4             |
| chr12 | 6707362  | 6707616  | CHD4             |
| chr12 | 6708913  | 6709203  | CHD4             |
| chr12 | 6709357  | 6709586  | CHD4             |
| chr12 | 6709674  | 6709860  | CHD4             |
| chr12 | 6710066  | 6710244  | CHD4             |
| chr12 | 6710429  | 6710721  | CHD4             |
| chr12 | 6710788  | 6710957  | CHD4             |
| chr12 | 6711100  | 6711366  | CHD4             |
| chr12 | 6711516  | 6711688  | CHD4             |
| chr12 | 6715414  | 6715564  | CHD4             |
| chr12 | 12274034 | 12274379 | BCL2L14, LRP6    |
| chr12 | 12277473 | 12277621 | BCL2L14, LRP6    |
| chr12 | 12278204 | 12278391 | BCL2L14, LRP6    |
| chr12 | 12279599 | 12279880 | BCL2L14, LRP6    |
| chr12 | 12283691 | 12283852 | BCL2L14, LRP6    |
| chr12 | 12284729 | 12285016 | BCL2L14, LRP6    |
| chr12 | 12288083 | 12288259 | BCL2L14, LRP6    |
| chr12 | 12291233 | 12291493 | BCL2L14, LRP6    |
| chr12 | 12300274 | 12300515 | LRP6             |
| chr12 | 12301850 | 12302112 | LRP6             |
| chr12 | 12303744 | 12303997 | LRP6             |
| chr12 | 12311737 | 12312114 | LRP6             |
| chr12 | 12312688 | 12312923 | LRP6             |
| chr12 | 12315101 | 12315378 | LRP6             |
| chr12 | 12317181 | 12317521 | LRP6             |
| chr12 | 12317987 | 12318254 | LRP6             |
| chr12 | 12332718 | 12332940 | LRP6             |
| chr12 | 12333951 | 12334398 | LRP6             |
| chr12 | 12336888 | 12337070 | LRP6             |
| chr12 | 12339831 | 12340078 | LRP6             |
| chr12 | 12356111 | 12356359 | LRP6             |
| chr12 | 12397170 | 12397614 | LRP6             |
| chr12 | 12419589 | 12419694 | LRP6             |
| chr12 | 12870748 | 12871273 | CDKN1B           |
| chr12 | 12871733 | 12871905 | CDKN1B           |
| chr12 | 12873973 | 12874166 | CDKN1B           |

|       |          |          |         |
|-------|----------|----------|---------|
| chr12 | 21294483 | 21294617 | SLCO1B1 |
| chr12 | 21325558 | 21325750 | SLCO1B1 |
| chr12 | 21327485 | 21327668 | SLCO1B1 |
| chr12 | 21329684 | 21329856 | SLCO1B1 |
| chr12 | 21331484 | 21331681 | SLCO1B1 |
| chr12 | 21331830 | 21331979 | SLCO1B1 |
| chr12 | 21349854 | 21350147 | SLCO1B1 |
| chr12 | 21353416 | 21353631 | SLCO1B1 |
| chr12 | 21355399 | 21355645 | SLCO1B1 |
| chr12 | 21358776 | 21358992 | SLCO1B1 |
| chr12 | 21370027 | 21370262 | SLCO1B1 |
| chr12 | 21375208 | 21375323 | SLCO1B1 |
| chr12 | 21377630 | 21377798 | SLCO1B1 |
| chr12 | 21391887 | 21392148 | SLCO1B1 |
| chr12 | 25362703 | 25362870 | KRAS    |
| chr12 | 25368349 | 25368519 | KRAS    |
| chr12 | 25378522 | 25378732 | KRAS    |
| chr12 | 25380142 | 25380371 | KRAS    |
| chr12 | 25398182 | 25398343 | KRAS    |
| chr12 | 46123594 | 46123736 | ARID2   |
| chr12 | 46123801 | 46123945 | ARID2   |
| chr12 | 46124974 | 46125122 | ARID2   |
| chr12 | 46205175 | 46205359 | ARID2   |
| chr12 | 46211427 | 46211696 | ARID2   |
| chr12 | 46215177 | 46215295 | ARID2   |
| chr12 | 46230346 | 46230463 | ARID2   |
| chr12 | 46230498 | 46230799 | ARID2   |
| chr12 | 46231078 | 46231225 | ARID2   |
| chr12 | 46231255 | 46231515 | ARID2   |
| chr12 | 46233086 | 46233304 | ARID2   |
| chr12 | 46240613 | 46240745 | ARID2   |
| chr12 | 46242593 | 46242778 | ARID2   |
| chr12 | 46243337 | 46243584 | ARID2   |
| chr12 | 46243793 | 46246704 | ARID2   |
| chr12 | 46254558 | 46254757 | ARID2   |
| chr12 | 46285537 | 46285726 | ARID2   |
| chr12 | 46285768 | 46285904 | ARID2   |
| chr12 | 46287177 | 46287351 | ARID2   |
| chr12 | 46287387 | 46287529 | ARID2   |
| chr12 | 46298691 | 46298886 | ARID2   |
| chr12 | 48238503 | 48238813 | VDR     |
| chr12 | 48240092 | 48240259 | VDR     |
| chr12 | 48240414 | 48240616 | VDR     |
| chr12 | 48249387 | 48249609 | VDR     |
| chr12 | 48250886 | 48251057 | VDR     |
| chr12 | 48251261 | 48251496 | VDR     |
| chr12 | 48258804 | 48258985 | VDR     |
| chr12 | 48272573 | 48272673 | VDR     |
| chr12 | 48272725 | 48272923 | VDR     |
| chr12 | 48276451 | 48276582 | VDR     |
| chr12 | 48298321 | 48298438 | VDR     |
| chr12 | 49415537 | 49415680 | KMT2D   |
| chr12 | 49415800 | 49415959 | KMT2D   |
| chr12 | 49416037 | 49416161 | KMT2D   |
| chr12 | 49416347 | 49416683 | KMT2D   |
| chr12 | 49418335 | 49418516 | KMT2D   |
| chr12 | 49418567 | 49418754 | KMT2D   |
| chr12 | 49419939 | 49421130 | KMT2D   |
| chr12 | 49421560 | 49421738 | KMT2D   |
| chr12 | 49421766 | 49421949 | KMT2D   |
| chr12 | 49422585 | 49422766 | KMT2D   |
| chr12 | 49422818 | 49423044 | KMT2D   |
| chr12 | 49423158 | 49423284 | KMT2D   |
| chr12 | 49424037 | 49424247 | KMT2D   |
| chr12 | 49424358 | 49424576 | KMT2D   |
| chr12 | 49424650 | 49424841 | KMT2D   |
| chr12 | 49424932 | 49427772 | KMT2D   |
| chr12 | 49427824 | 49428107 | KMT2D   |
| chr12 | 49428167 | 49428284 | KMT2D   |
| chr12 | 49428339 | 49428474 | KMT2D   |
| chr12 | 49428569 | 49428743 | KMT2D   |
| chr12 | 49430882 | 49432797 | KMT2D   |
| chr12 | 49432979 | 49433166 | KMT2D   |
| chr12 | 49433192 | 49433425 | KMT2D   |
| chr12 | 49433481 | 49435343 | KMT2D   |
| chr12 | 49435412 | 49435513 | KMT2D   |
| chr12 | 49435674 | 49435798 | KMT2D   |
| chr12 | 49435846 | 49436138 | KMT2D   |
| chr12 | 49436318 | 49436453 | KMT2D   |
| chr12 | 49436498 | 49436686 | KMT2D   |
| chr12 | 49436833 | 49436994 | KMT2D   |
| chr12 | 49437120 | 49437236 | KMT2D   |
| chr12 | 49437392 | 49437590 | KMT2D   |
| chr12 | 49437625 | 49437806 | KMT2D   |
| chr12 | 49437957 | 49438112 | KMT2D   |
| chr12 | 49438160 | 49438330 | KMT2D   |
| chr12 | 49438501 | 49438773 | KMT2D   |
| chr12 | 49439677 | 49439775 | KMT2D   |
| chr12 | 49439822 | 49439982 | KMT2D   |
| chr12 | 49440017 | 49440232 | KMT2D   |
| chr12 | 49440366 | 49440598 | KMT2D   |
| chr12 | 49441722 | 49441877 | KMT2D   |
| chr12 | 49442416 | 49442577 | KMT2D   |
| chr12 | 49442862 | 49443026 | KMT2D   |
| chr12 | 49443439 | 49444598 | KMT2D   |
| chr12 | 49444643 | 49446232 | KMT2D   |

|       |           |           |                  |
|-------|-----------|-----------|------------------|
| chr12 | 49446321  | 49446517  | KMT2D            |
| chr12 | 49446672  | 49446880  | KMT2D            |
| chr12 | 49446964  | 49447129  | KMT2D            |
| chr12 | 49447233  | 49447449  | KMT2D            |
| chr12 | 49447735  | 49447948  | KMT2D            |
| chr12 | 49448064  | 49448224  | KMT2D            |
| chr12 | 49448285  | 49448559  | KMT2D            |
| chr12 | 49448657  | 49448834  | KMT2D            |
| chr12 | 49449033  | 49449132  | KMT2D            |
| chr12 | 52345502  | 52345643  | ACVR1B           |
| chr12 | 52369023  | 52369313  | ACVR1B           |
| chr12 | 52370085  | 52370384  | ACVR1B           |
| chr12 | 52374727  | 52375008  | ACVR1B           |
| chr12 | 52376444  | 52376617  | ACVR1B           |
| chr12 | 52377757  | 52377975  | ACVR1B           |
| chr12 | 52378950  | 52379157  | ACVR1B           |
| chr12 | 52380576  | 52380954  | ACVR1B           |
| chr12 | 52385621  | 52385841  | ACVR1B           |
| chr12 | 52387743  | 52387919  | ACVR1B           |
| chr12 | 56474059  | 56474191  | ERBB3            |
| chr12 | 56477509  | 56477711  | ERBB3            |
| chr12 | 56478753  | 56479121  | ERBB3            |
| chr12 | 56480289  | 56480465  | ERBB3            |
| chr12 | 56481335  | 56481451  | ERBB3            |
| chr12 | 56481553  | 56481722  | ERBB3            |
| chr12 | 56481779  | 56481971  | ERBB3            |
| chr12 | 56482301  | 56482465  | ERBB3            |
| chr12 | 56482506  | 56482677  | ERBB3            |
| chr12 | 56482882  | 56482937  | ERBB3            |
| chr12 | 56486505  | 56486629  | ERBB3            |
| chr12 | 56486744  | 56486885  | ERBB3            |
| chr12 | 56487103  | 56487359  | ERBB3            |
| chr12 | 56487522  | 56487705  | ERBB3            |
| chr12 | 56487857  | 56487998  | ERBB3            |
| chr12 | 56488160  | 56488365  | ERBB3            |
| chr12 | 56489015  | 56489119  | ERBB3            |
| chr12 | 56489423  | 56489615  | ERBB3            |
| chr12 | 56490261  | 56490431  | ERBB3            |
| chr12 | 56490506  | 56490655  | ERBB3            |
| chr12 | 56490803  | 56491039  | ERBB3            |
| chr12 | 56491543  | 56491749  | ERBB3            |
| chr12 | 56492258  | 56492384  | ERBB3            |
| chr12 | 56492517  | 56492714  | ERBB3            |
| chr12 | 56493406  | 56493554  | ERBB3            |
| chr12 | 56493596  | 56493838  | ERBB3            |
| chr12 | 56493932  | 56494054  | ERBB3            |
| chr12 | 56494819  | 56495170  | ERBB3            |
| chr12 | 56495287  | 56495864  | ERBB3            |
| chr12 | 58142282  | 58142425  | CDK4, TSPAN31    |
| chr12 | 58142939  | 58143125  | CDK4, TSPAN31    |
| chr12 | 58143211  | 58143312  | CDK4, TSPAN31    |
| chr12 | 58144413  | 58144573  | CDK4             |
| chr12 | 58144680  | 58144898  | CDK4             |
| chr12 | 58144964  | 58145150  | CDK4             |
| chr12 | 58145257  | 58145525  | CDK4             |
| chr12 | 69202232  | 69202296  | MDM2             |
| chr12 | 69202962  | 69203103  | MDM2             |
| chr12 | 69207308  | 69207433  | MDM2             |
| chr12 | 69210566  | 69210750  | MDM2             |
| chr12 | 69214079  | 69214179  | MDM2             |
| chr12 | 69218117  | 69218235  | MDM2             |
| chr12 | 69218309  | 69218456  | MDM2             |
| chr12 | 69222525  | 69222736  | MDM2             |
| chr12 | 69229583  | 69229789  | MDM2             |
| chr12 | 69230352  | 69230417  | MDM2             |
| chr12 | 69230426  | 69230554  | MDM2             |
| chr12 | 69233028  | 69233654  | MDM2             |
| chr12 | 112856890 | 112856954 | PTPN11           |
| chr12 | 112884054 | 112884227 | PTPN11           |
| chr12 | 112888096 | 112888341 | PTPN11           |
| chr12 | 112890973 | 112891216 | PTPN11           |
| chr12 | 112892342 | 112892509 | PTPN11           |
| chr12 | 112892572 | 112892628 | PTPN11           |
| chr12 | 112893728 | 112893892 | PTPN11           |
| chr12 | 112910722 | 112910869 | PTPN11           |
| chr12 | 112915429 | 112915559 | PTPN11           |
| chr12 | 112915635 | 112915844 | PTPN11           |
| chr12 | 112919852 | 112920034 | PTPN11           |
| chr12 | 112924253 | 112924462 | PTPN11           |
| chr12 | 112926221 | 112926339 | PTPN11           |
| chr12 | 112926802 | 112927004 | PTPN11           |
| chr12 | 112939922 | 112940085 | PTPN11           |
| chr12 | 112942473 | 112942593 | PTPN11           |
| chr12 | 121416546 | 121416922 | HNF1A, HNF1A-AS1 |
| chr12 | 121426610 | 121426860 | HNF1A            |
| chr12 | 121431297 | 121431534 | HNF1A            |
| chr12 | 121431941 | 121432233 | HNF1A            |
| chr12 | 121434039 | 121434241 | HNF1A            |
| chr12 | 121434318 | 121434824 | HNF1A            |
| chr12 | 121435251 | 121435621 | HNF1A            |
| chr12 | 121437045 | 121437455 | HNF1A            |
| chr12 | 121438842 | 121439020 | HNF1A            |
| chr12 | 121439558 | 121439621 | HNF1A            |
| chr12 | 121439853 | 121439960 | HNF1A            |
| chr12 | 121440215 | 121440313 | C12ORF43, HNF1A  |
| chr12 | 133201257 | 133201421 | POLE             |

|       |           |           |      |
|-------|-----------|-----------|------|
| chr12 | 133201465 | 133201605 | POLE |
| chr12 | 133201812 | 133202027 | POLE |
| chr12 | 133202205 | 133202381 | POLE |
| chr12 | 133202677 | 133202928 | POLE |
| chr12 | 133208875 | 133209119 | POLE |
| chr12 | 133209224 | 133209406 | POLE |
| chr12 | 133210746 | 133210989 | POLE |
| chr12 | 133212452 | 133212635 | POLE |
| chr12 | 133214574 | 133214750 | POLE |
| chr12 | 133215685 | 133215909 | POLE |
| chr12 | 133217578 | 133217636 | POLE |
| chr12 | 133218207 | 133218462 | POLE |
| chr12 | 133218737 | 133219008 | POLE |
| chr12 | 133219066 | 133219340 | POLE |
| chr12 | 133219380 | 133219607 | POLE |
| chr12 | 133219784 | 133219941 | POLE |
| chr12 | 133219967 | 133220171 | POLE |
| chr12 | 133220397 | 133220588 | POLE |
| chr12 | 133225489 | 133225683 | POLE |
| chr12 | 133225866 | 133226126 | POLE |
| chr12 | 133226237 | 133226500 | POLE |
| chr12 | 133233696 | 133233869 | POLE |
| chr12 | 133233909 | 133234040 | POLE |
| chr12 | 133234428 | 133234581 | POLE |
| chr12 | 133235855 | 133236120 | POLE |
| chr12 | 133237529 | 133237775 | POLE |
| chr12 | 133238087 | 133238295 | POLE |
| chr12 | 133240564 | 133240759 | POLE |
| chr12 | 133240930 | 133241073 | POLE |
| chr12 | 133241862 | 133242061 | POLE |
| chr12 | 133244063 | 133244259 | POLE |
| chr12 | 133244916 | 133245113 | POLE |
| chr12 | 133245195 | 133245348 | POLE |
| chr12 | 133245371 | 133245550 | POLE |
| chr12 | 133248775 | 133248933 | POLE |
| chr12 | 133249187 | 133249450 | POLE |
| chr12 | 133249724 | 133249888 | POLE |
| chr12 | 133250135 | 133250318 | POLE |
| chr12 | 133251958 | 133252128 | POLE |
| chr12 | 133252295 | 133252431 | POLE |
| chr12 | 133252654 | 133252815 | POLE |
| chr12 | 133253106 | 133253264 | POLE |
| chr12 | 133253923 | 133254054 | POLE |
| chr12 | 133254138 | 133254330 | POLE |
| chr12 | 133256057 | 133256262 | POLE |
| chr12 | 133256514 | 133256657 | POLE |
| chr12 | 133256738 | 133256833 | POLE |
| chr12 | 133257167 | 133257298 | POLE |
| chr12 | 133257698 | 133257890 | POLE |
| chr12 | 133263814 | 133263926 | POLE |
| chr12 | 133413267 | 133413412 | CHFR |
| chr13 | 26828753  | 26828931  | CDK8 |
| chr13 | 26911678  | 26911804  | CDK8 |
| chr13 | 26923183  | 26923344  | CDK8 |
| chr13 | 26927851  | 26928042  | CDK8 |
| chr13 | 26956925  | 26957033  | CDK8 |
| chr13 | 26959322  | 26959504  | CDK8 |
| chr13 | 26967478  | 26967672  | CDK8 |
| chr13 | 26970396  | 26970516  | CDK8 |
| chr13 | 26971264  | 26971387  | CDK8 |
| chr13 | 26974564  | 26974712  | CDK8 |
| chr13 | 26975380  | 26975509  | CDK8 |
| chr13 | 26975577  | 26975786  | CDK8 |
| chr13 | 26978067  | 26978243  | CDK8 |
| chr13 | 28578163  | 28578336  | FLT3 |
| chr13 | 28588563  | 28588719  | FLT3 |
| chr13 | 28589268  | 28589418  | FLT3 |
| chr13 | 28589701  | 28589863  | FLT3 |
| chr13 | 28592569  | 28592751  | FLT3 |
| chr13 | 28597461  | 28597639  | FLT3 |
| chr13 | 28598972  | 28599105  | FLT3 |
| chr13 | 28601199  | 28601403  | FLT3 |
| chr13 | 28602289  | 28602450  | FLT3 |
| chr13 | 28607998  | 28608153  | FLT3 |
| chr13 | 28608193  | 28608376  | FLT3 |
| chr13 | 28608412  | 28608569  | FLT3 |
| chr13 | 28609606  | 28609835  | FLT3 |
| chr13 | 28610046  | 28610205  | FLT3 |
| chr13 | 28611296  | 28611450  | FLT3 |
| chr13 | 28622386  | 28622605  | FLT3 |
| chr13 | 28623495  | 28623699  | FLT3 |
| chr13 | 28623746  | 28623936  | FLT3 |
| chr13 | 28624206  | 28624384  | FLT3 |
| chr13 | 28626656  | 28626836  | FLT3 |
| chr13 | 28631458  | 28631624  | FLT3 |
| chr13 | 28635978  | 28636231  | FLT3 |
| chr13 | 28644602  | 28644774  | FLT3 |
| chr13 | 28674579  | 28674672  | FLT3 |
| chr13 | 28877278  | 28877530  | FLT1 |
| chr13 | 28880789  | 28880934  | FLT1 |
| chr13 | 28882954  | 28883089  | FLT1 |
| chr13 | 28885701  | 28885894  | FLT1 |
| chr13 | 28886104  | 28886260  | FLT1 |
| chr13 | 28891609  | 28891759  | FLT1 |
| chr13 | 28893534  | 28893696  | FLT1 |
| chr13 | 28895574  | 28895747  | FLT1 |

|       |           |           |                       |
|-------|-----------|-----------|-----------------------|
| chr13 | 28896373  | 28896521  | FLT1                  |
| chr13 | 28896567  | 28896639  | FLT1                  |
| chr13 | 28896901  | 28897108  | FLT1                  |
| chr13 | 28901573  | 28901712  | FLT1                  |
| chr13 | 28903726  | 28903890  | FLT1                  |
| chr13 | 28908136  | 28908291  | FLT1                  |
| chr13 | 28913279  | 28913462  | FLT1                  |
| chr13 | 28919556  | 28919713  | FLT1                  |
| chr13 | 28931665  | 28931847  | FLT1                  |
| chr13 | 28942689  | 28942825  | FLT1                  |
| chr13 | 28958996  | 28959193  | FLT1                  |
| chr13 | 28963812  | 28964266  | FLT1                  |
| chr13 | 28970917  | 28971011  | FLT1                  |
| chr13 | 28971071  | 28971230  | FLT1                  |
| chr13 | 28973155  | 28973280  | FLT1                  |
| chr13 | 28979891  | 28980056  | FLT1                  |
| chr13 | 29001270  | 29001480  | FLT1                  |
| chr13 | 29001863  | 29002083  | FLT1                  |
| chr13 | 29004161  | 29004329  | FLT1                  |
| chr13 | 29005247  | 29005472  | FLT1                  |
| chr13 | 29007930  | 29008117  | FLT1                  |
| chr13 | 29008169  | 29008382  | FLT1                  |
| chr13 | 29012332  | 29012507  | FLT1                  |
| chr13 | 29041014  | 29041291  | FLT1                  |
| chr13 | 29041632  | 29041779  | FLT1                  |
| chr13 | 29068891  | 29069005  | FLT1                  |
| chr13 | 32890572  | 32890689  | BRCA2                 |
| chr13 | 32893188  | 32893487  | BRCA2                 |
| chr13 | 32899187  | 32899346  | BRCA2                 |
| chr13 | 32900212  | 32900312  | BRCA2                 |
| chr13 | 32900353  | 32900444  | BRCA2                 |
| chr13 | 32900610  | 32900775  | BRCA2                 |
| chr13 | 32903554  | 32903654  | BRCA2                 |
| chr13 | 32905030  | 32905192  | BRCA2                 |
| chr13 | 32906383  | 32907549  | BRCA2                 |
| chr13 | 32910376  | 32915358  | BRCA2                 |
| chr13 | 32918669  | 32918815  | BRCA2                 |
| chr13 | 32920938  | 32921058  | BRCA2                 |
| chr13 | 32928972  | 32929450  | BRCA2                 |
| chr13 | 32930539  | 32930771  | BRCA2                 |
| chr13 | 32931853  | 32932091  | BRCA2                 |
| chr13 | 32936634  | 32936855  | BRCA2                 |
| chr13 | 32937290  | 32937695  | BRCA2                 |
| chr13 | 32944513  | 32944719  | BRCA2                 |
| chr13 | 32945067  | 32945262  | BRCA2                 |
| chr13 | 32950781  | 32950953  | BRCA2                 |
| chr13 | 32953428  | 32953677  | BRCA2                 |
| chr13 | 32953861  | 32954075  | BRCA2                 |
| chr13 | 32954118  | 32954307  | BRCA2                 |
| chr13 | 32968800  | 32969095  | BRCA2                 |
| chr13 | 32971009  | 32971206  | BRCA2                 |
| chr13 | 32972273  | 32972932  | BRCA2                 |
| chr13 | 48878023  | 48878210  | RB1                   |
| chr13 | 48881390  | 48881567  | RB1                   |
| chr13 | 48916709  | 48916875  | RB1                   |
| chr13 | 48919190  | 48919360  | RB1                   |
| chr13 | 48921935  | 48922024  | RB1                   |
| chr13 | 48923066  | 48923184  | RB1                   |
| chr13 | 48934127  | 48934288  | RB1                   |
| chr13 | 48936925  | 48937118  | RB1                   |
| chr13 | 48939004  | 48939132  | RB1                   |
| chr13 | 48941604  | 48941764  | RB1                   |
| chr13 | 48942637  | 48942765  | RB1                   |
| chr13 | 48947515  | 48947653  | RB1                   |
| chr13 | 48951028  | 48951195  | RB1                   |
| chr13 | 48953704  | 48953811  | RB1                   |
| chr13 | 48954163  | 48954245  | RB1                   |
| chr13 | 48954275  | 48954402  | RB1                   |
| chr13 | 48955357  | 48955604  | RB1                   |
| chr13 | 49027103  | 49027272  | RB1                   |
| chr13 | 49030314  | 49030510  | RB1                   |
| chr13 | 49033798  | 49033994  | RB1                   |
| chr13 | 49037841  | 49037996  | RB1                   |
| chr13 | 49039108  | 49039272  | RB1                   |
| chr13 | 49039315  | 49039529  | RB1                   |
| chr13 | 49047470  | 49047551  | RB1                   |
| chr13 | 49050811  | 49051004  | RB1                   |
| chr13 | 49051465  | 49051565  | RB1                   |
| chr13 | 49054108  | 49054232  | RB1                   |
| chr13 | 110408625 | 110408680 | IRS2                  |
| chr13 | 110434363 | 110438425 | IRS2                  |
| chr14 | 23776951  | 23777433  | BCL2L2, BCL2L2-PABPN1 |
| chr14 | 23777999  | 23778199  | BCL2L2, BCL2L2-PABPN1 |
| chr14 | 36986457  | 36987250  | NKX2-1                |
| chr14 | 36988164  | 36988600  | NKX2-1, NKX2-1-AS1    |
| chr14 | 36989232  | 36989359  | NKX2-1, NKX2-1-AS1    |
| chr14 | 64551609  | 64551795  | ESR2, SYNE2           |
| chr14 | 64694225  | 64694357  | ESR2                  |
| chr14 | 64694582  | 64694672  | ESR2                  |
| chr14 | 64694719  | 64694788  | ESR2                  |
| chr14 | 64699829  | 64700066  | ESR2                  |
| chr14 | 64701649  | 64701893  | ESR2                  |
| chr14 | 64716238  | 64716422  | ESR2                  |
| chr14 | 64723918  | 64724107  | ESR2                  |
| chr14 | 64726867  | 64726934  | ESR2                  |
| chr14 | 64727141  | 64727491  | ESR2                  |

|       |           |           |          |
|-------|-----------|-----------|----------|
| chr14 | 64735487  | 64735654  | ESR2     |
| chr14 | 64746673  | 64746896  | ESR2     |
| chr14 | 64749316  | 64749728  | ESR2     |
| chr14 | 81421999  | 81422219  | TSHR     |
| chr14 | 81528466  | 81528588  | TSHR     |
| chr14 | 81534572  | 81534697  | TSHR     |
| chr14 | 81554272  | 81554397  | TSHR     |
| chr14 | 81557387  | 81557512  | TSHR     |
| chr14 | 81558849  | 81558977  | TSHR     |
| chr14 | 81562957  | 81563076  | TSHR     |
| chr14 | 81574693  | 81574821  | TSHR     |
| chr14 | 81574867  | 81575050  | TSHR     |
| chr14 | 81605997  | 81606236  | TSHR     |
| chr14 | 81609258  | 81610722  | TSHR     |
| chr14 | 102548023 | 102548183 | HSP90AA1 |
| chr14 | 102548422 | 102548806 | HSP90AA1 |
| chr14 | 102549321 | 102549664 | HSP90AA1 |
| chr14 | 102549857 | 102550055 | HSP90AA1 |
| chr14 | 102550104 | 102550345 | HSP90AA1 |
| chr14 | 102550710 | 102550926 | HSP90AA1 |
| chr14 | 102550992 | 102551360 | HSP90AA1 |
| chr14 | 102551609 | 102551793 | HSP90AA1 |
| chr14 | 102552069 | 102552486 | HSP90AA1 |
| chr14 | 102552528 | 102552740 | HSP90AA1 |
| chr14 | 102568186 | 102568447 | HSP90AA1 |
| chr14 | 102605561 | 102605766 | HSP90AA1 |
| chr14 | 105236652 | 105236782 | AKT1     |
| chr14 | 105237056 | 105237209 | AKT1     |
| chr14 | 105238676 | 105238814 | AKT1     |
| chr14 | 105239189 | 105239454 | AKT1     |
| chr14 | 105239562 | 105239741 | AKT1     |
| chr14 | 105239766 | 105239942 | AKT1     |
| chr14 | 105240223 | 105240342 | AKT1     |
| chr14 | 105241249 | 105241365 | AKT1     |
| chr14 | 105241387 | 105241569 | AKT1     |
| chr14 | 105241963 | 105242161 | AKT1     |
| chr14 | 105242970 | 105243132 | AKT1     |
| chr14 | 105246399 | 105246578 | AKT1     |
| chr14 | 105258909 | 105259005 | AKT1     |
| chr14 | 105609006 | 105609532 | JAG2     |
| chr14 | 105609793 | 105610000 | JAG2     |
| chr14 | 105611241 | 105611423 | JAG2     |
| chr14 | 105612042 | 105612335 | JAG2     |
| chr14 | 105612696 | 105612862 | JAG2     |
| chr14 | 105612922 | 105613086 | JAG2     |
| chr14 | 105613637 | 105613773 | JAG2     |
| chr14 | 105613811 | 105613889 | JAG2     |
| chr14 | 105614083 | 105614250 | JAG2     |
| chr14 | 105614427 | 105614591 | JAG2     |
| chr14 | 105614637 | 105614801 | JAG2     |
| chr14 | 105615056 | 105615220 | JAG2     |
| chr14 | 105615248 | 105615451 | JAG2     |
| chr14 | 105615481 | 105615682 | JAG2     |
| chr14 | 105616915 | 105617139 | JAG2     |
| chr14 | 105617176 | 105617273 | JAG2     |
| chr14 | 105617302 | 105617466 | JAG2     |
| chr14 | 105617594 | 105617758 | JAG2     |
| chr14 | 105617937 | 105618101 | JAG2     |
| chr14 | 105618249 | 105618419 | JAG2     |
| chr14 | 105618472 | 105618653 | JAG2     |
| chr14 | 105621873 | 105621984 | JAG2     |
| chr14 | 105622049 | 105622351 | JAG2     |
| chr14 | 105624017 | 105624125 | JAG2     |
| chr14 | 105634068 | 105634469 | JAG2     |
| chr14 | 105634666 | 105634782 | JAG2     |
| chr15 | 41221841  | 41221957  | DLL4     |
| chr15 | 41222019  | 41222339  | DLL4     |
| chr15 | 41222797  | 41222905  | DLL4     |
| chr15 | 41223675  | 41223989  | DLL4     |
| chr15 | 41224343  | 41224454  | DLL4     |
| chr15 | 41224489  | 41224670  | DLL4     |
| chr15 | 41226720  | 41226940  | DLL4     |
| chr15 | 41227070  | 41227340  | DLL4     |
| chr15 | 41228400  | 41229153  | DLL4     |
| chr15 | 41229590  | 41229749  | DLL4     |
| chr15 | 41230201  | 41230257  | DLL4     |
| chr15 | 41795757  | 41795823  | LTK      |
| chr15 | 41796168  | 41796467  | LTK      |
| chr15 | 41796514  | 41796655  | LTK      |
| chr15 | 41796678  | 41796863  | LTK      |
| chr15 | 41796945  | 41797097  | LTK      |
| chr15 | 41797144  | 41797287  | LTK      |
| chr15 | 41797380  | 41797528  | LTK      |
| chr15 | 41797573  | 41797753  | LTK      |
| chr15 | 41797885  | 41798000  | LTK      |
| chr15 | 41798087  | 41798228  | LTK      |
| chr15 | 41799267  | 41799513  | LTK      |
| chr15 | 41799661  | 41799880  | LTK      |
| chr15 | 41800241  | 41800444  | LTK      |
| chr15 | 41801203  | 41801352  | LTK      |
| chr15 | 41803336  | 41803569  | LTK      |
| chr15 | 41803594  | 41803801  | LTK      |
| chr15 | 41803989  | 41804186  | LTK      |
| chr15 | 41804287  | 41804488  | LTK      |
| chr15 | 41804879  | 41805101  | LTK      |
| chr15 | 41805149  | 41805343  | LTK      |



|       |          |          |                  |
|-------|----------|----------|------------------|
| chr15 | 41805839 | 41805932 | LTK              |
| chr15 | 66679660 | 66679790 | MAP2K1           |
| chr15 | 66727339 | 66727600 | MAP2K1           |
| chr15 | 66729058 | 66729255 | MAP2K1           |
| chr15 | 66735592 | 66735720 | MAP2K1           |
| chr15 | 66736968 | 66737070 | MAP2K1           |
| chr15 | 66774067 | 66774242 | MAP2K1           |
| chr15 | 66777302 | 66777554 | MAP2K1           |
| chr15 | 66779540 | 66779655 | MAP2K1           |
| chr15 | 66781527 | 66781639 | MAP2K1           |
| chr15 | 66782030 | 66782126 | MAP2K1           |
| chr15 | 66782814 | 66782978 | MAP2K1, SNAPC5   |
| chr15 | 67358467 | 67358723 | SMAD3            |
| chr15 | 67430339 | 67430463 | SMAD3            |
| chr15 | 67457207 | 67457451 | SMAD3            |
| chr15 | 67457565 | 67457747 | SMAD3            |
| chr15 | 67459091 | 67459216 | SMAD3            |
| chr15 | 67462866 | 67462967 | SMAD3            |
| chr15 | 67473553 | 67473816 | SMAD3            |
| chr15 | 67477039 | 67477227 | SMAD3            |
| chr15 | 67479677 | 67479872 | SMAD3            |
| chr15 | 67482725 | 67482899 | SMAD3            |
| chr15 | 75042054 | 75042935 | CYP1A2           |
| chr15 | 75043504 | 75043675 | CYP1A2           |
| chr15 | 75044080 | 75044220 | CYP1A2           |
| chr15 | 75044439 | 75044613 | CYP1A2           |
| chr15 | 75045499 | 75045636 | CYP1A2           |
| chr15 | 75047106 | 75047454 | CYP1A2           |
| chr15 | 80253383 | 80253541 | BCL2A1           |
| chr15 | 80259953 | 80260059 | BCL2A1           |
| chr15 | 80263016 | 80263486 | BCL2A1           |
| chr15 | 88420140 | 88420376 | NTRK3            |
| chr15 | 88423475 | 88423684 | NTRK3            |
| chr15 | 88428899 | 88428991 | NTRK3            |
| chr15 | 88459751 | 88459816 | NTRK3            |
| chr15 | 88472396 | 88472690 | NTRK3            |
| chr15 | 88474405 | 88474492 | NTRK3            |
| chr15 | 88476217 | 88476440 | NTRK3            |
| chr15 | 88483828 | 88484009 | NTRK3            |
| chr15 | 88509649 | 88509706 | NTRK3            |
| chr15 | 88522550 | 88522719 | NTRK3            |
| chr15 | 88524427 | 88524616 | NTRK3            |
| chr15 | 88535156 | 88535231 | NTRK3            |
| chr15 | 88576062 | 88576301 | NTRK3            |
| chr15 | 88669476 | 88669629 | NTRK3            |
| chr15 | 88670367 | 88670482 | NTRK3            |
| chr15 | 88671916 | 88671990 | NTRK3            |
| chr15 | 88678306 | 88678653 | NTRK3            |
| chr15 | 88679104 | 88679296 | NTRK3            |
| chr15 | 88679672 | 88679865 | NTRK3            |
| chr15 | 88680609 | 88680817 | NTRK3            |
| chr15 | 88690540 | 88690659 | NTRK3            |
| chr15 | 88726623 | 88726745 | NTRK3            |
| chr15 | 88727430 | 88727555 | NTRK3            |
| chr15 | 88799111 | 88799409 | NTRK3, NTRK3-AS1 |
| chr15 | 90627472 | 90627610 | IDH2             |
| chr15 | 90628022 | 90628165 | IDH2             |
| chr15 | 90628207 | 90628355 | IDH2             |
| chr15 | 90628481 | 90628644 | IDH2             |
| chr15 | 90630318 | 90630520 | IDH2             |
| chr15 | 90630645 | 90630832 | IDH2             |
| chr15 | 90631565 | 90631759 | IDH2             |
| chr15 | 90631793 | 90632004 | IDH2             |
| chr15 | 90633685 | 90633901 | IDH2             |
| chr15 | 90634759 | 90634901 | IDH2             |
| chr15 | 90645482 | 90645647 | IDH2             |
| chr15 | 93444442 | 93444554 | CHD2             |
| chr15 | 93448112 | 93448263 | CHD2             |
| chr15 | 93467525 | 93467807 | CHD2             |
| chr15 | 93470448 | 93470585 | CHD2             |
| chr15 | 93472234 | 93472346 | CHD2             |
| chr15 | 93480722 | 93480880 | CHD2             |
| chr15 | 93482782 | 93482973 | CHD2             |
| chr15 | 93485026 | 93485210 | CHD2             |
| chr15 | 93486047 | 93486323 | CHD2             |
| chr15 | 93487619 | 93487770 | CHD2             |
| chr15 | 93489025 | 93489120 | CHD2             |
| chr15 | 93489242 | 93489471 | CHD2             |
| chr15 | 93492156 | 93492335 | CHD2             |
| chr15 | 93496561 | 93496828 | CHD2             |
| chr15 | 93498627 | 93498767 | CHD2             |
| chr15 | 93499663 | 93499904 | CHD2             |
| chr15 | 93510529 | 93510768 | CHD2             |
| chr15 | 93514969 | 93515182 | CHD2             |
| chr15 | 93515469 | 93515672 | CHD2             |
| chr15 | 93518083 | 93518205 | CHD2             |
| chr15 | 93521438 | 93521638 | CHD2             |
| chr15 | 93522339 | 93522538 | CHD2             |
| chr15 | 93524019 | 93524166 | CHD2             |
| chr15 | 93524569 | 93524712 | CHD2             |
| chr15 | 93527534 | 93527755 | CHD2             |
| chr15 | 93528702 | 93528928 | CHD2             |
| chr15 | 93534680 | 93534772 | CHD2             |
| chr15 | 93536063 | 93536253 | CHD2             |
| chr15 | 93540161 | 93540350 | CHD2             |
| chr15 | 93540457 | 93540658 | CHD2             |

|       |          |          |        |
|-------|----------|----------|--------|
| chr15 | 93541703 | 93541876 | CHD2   |
| chr15 | 93543716 | 93543895 | CHD2   |
| chr15 | 93545381 | 93545572 | CHD2   |
| chr15 | 93547821 | 93548006 | CHD2   |
| chr15 | 93552349 | 93552578 | CHD2   |
| chr15 | 93555549 | 93555699 | CHD2   |
| chr15 | 93557900 | 93558164 | CHD2   |
| chr15 | 93563216 | 93563513 | CHD2   |
| chr15 | 93567576 | 93567960 | CHD2   |
| chr15 | 99192785 | 99192929 | IGF1R  |
| chr15 | 99250765 | 99251361 | IGF1R  |
| chr15 | 99434528 | 99434891 | IGF1R  |
| chr15 | 99439960 | 99440159 | IGF1R  |
| chr15 | 99442680 | 99442875 | IGF1R  |
| chr15 | 99451888 | 99452153 | IGF1R  |
| chr15 | 99454518 | 99454695 | IGF1R  |
| chr15 | 99456247 | 99456536 | IGF1R  |
| chr15 | 99459167 | 99459385 | IGF1R  |
| chr15 | 99459875 | 99460130 | IGF1R  |
| chr15 | 99465351 | 99465685 | IGF1R  |
| chr15 | 99467079 | 99467266 | IGF1R  |
| chr15 | 99467728 | 99467938 | IGF1R  |
| chr15 | 99472761 | 99472914 | IGF1R  |
| chr15 | 99473438 | 99473559 | IGF1R  |
| chr15 | 99478027 | 99478307 | IGF1R  |
| chr15 | 99478519 | 99478680 | IGF1R  |
| chr15 | 99482404 | 99482614 | IGF1R  |
| chr15 | 99486126 | 99486306 | IGF1R  |
| chr15 | 99491777 | 99491962 | IGF1R  |
| chr15 | 99500264 | 99500696 | IGF1R  |
| chr16 | 338096   | 338273   | AXIN1  |
| chr16 | 339414   | 339632   | AXIN1  |
| chr16 | 341164   | 341322   | AXIN1  |
| chr16 | 343462   | 343743   | AXIN1  |
| chr16 | 347030   | 347251   | AXIN1  |
| chr16 | 347696   | 348276   | AXIN1  |
| chr16 | 354278   | 354466   | AXIN1  |
| chr16 | 359947   | 360094   | AXIN1  |
| chr16 | 364517   | 364708   | AXIN1  |
| chr16 | 396122   | 397050   | AXIN1  |
| chr16 | 2098591  | 2098779  | TSC2   |
| chr16 | 2100375  | 2100512  | TSC2   |
| chr16 | 2103317  | 2103478  | TSC2   |
| chr16 | 2104271  | 2104466  | TSC2   |
| chr16 | 2105377  | 2105545  | TSC2   |
| chr16 | 2106171  | 2106270  | TSC2   |
| chr16 | 2106619  | 2106795  | TSC2   |
| chr16 | 2107080  | 2107204  | TSC2   |
| chr16 | 2108722  | 2108899  | TSC2   |
| chr16 | 2110645  | 2110839  | TSC2   |
| chr16 | 2111846  | 2112034  | TSC2   |
| chr16 | 2112472  | 2112626  | TSC2   |
| chr16 | 2112947  | 2113079  | TSC2   |
| chr16 | 2114247  | 2114453  | TSC2   |
| chr16 | 2115494  | 2115661  | TSC2   |
| chr16 | 2120431  | 2120604  | TSC2   |
| chr16 | 2121485  | 2121642  | TSC2   |
| chr16 | 2121759  | 2121960  | TSC2   |
| chr16 | 2122216  | 2122389  | TSC2   |
| chr16 | 2122824  | 2123009  | TSC2   |
| chr16 | 2124175  | 2124415  | TSC2   |
| chr16 | 2125774  | 2125918  | TSC2   |
| chr16 | 2126043  | 2126196  | TSC2   |
| chr16 | 2126466  | 2126611  | TSC2   |
| chr16 | 2127573  | 2127752  | TSC2   |
| chr16 | 2129007  | 2129222  | TSC2   |
| chr16 | 2129251  | 2129454  | TSC2   |
| chr16 | 2129532  | 2129695  | TSC2   |
| chr16 | 2130140  | 2130403  | TSC2   |
| chr16 | 2131570  | 2131824  | TSC2   |
| chr16 | 2132411  | 2132530  | TSC2   |
| chr16 | 2133670  | 2133842  | TSC2   |
| chr16 | 2134203  | 2134741  | TSC2   |
| chr16 | 2134926  | 2135052  | TSC2   |
| chr16 | 2135205  | 2135348  | TSC2   |
| chr16 | 2136168  | 2136405  | TSC2   |
| chr16 | 2136707  | 2136897  | TSC2   |
| chr16 | 2137838  | 2137967  | TSC2   |
| chr16 | 2138023  | 2138165  | TSC2   |
| chr16 | 2138202  | 2138351  | TSC2   |
| chr16 | 2138421  | 2138636  | TSC2   |
| chr16 | 3777693  | 3779900  | CREBBP |
| chr16 | 3781167  | 3781499  | CREBBP |
| chr16 | 3781751  | 3781963  | CREBBP |
| chr16 | 3786011  | 3786229  | CREBBP |
| chr16 | 3786625  | 3786841  | CREBBP |
| chr16 | 3788534  | 3788698  | CREBBP |
| chr16 | 3789553  | 3789750  | CREBBP |
| chr16 | 3790374  | 3790575  | CREBBP |
| chr16 | 3794869  | 3794987  | CREBBP |
| chr16 | 3795252  | 3795380  | CREBBP |
| chr16 | 3799602  | 3799709  | CREBBP |
| chr16 | 3801701  | 3801832  | CREBBP |
| chr16 | 3807263  | 3807402  | CREBBP |
| chr16 | 3807784  | 3808074  | CREBBP |
| chr16 | 3808829  | 3808998  | CREBBP |

|       |          |          |             |
|-------|----------|----------|-------------|
| chr16 | 3817695  | 3817935  | CREBBP      |
| chr16 | 3819149  | 3819379  | CREBBP      |
| chr16 | 3820545  | 3821012  | CREBBP      |
| chr16 | 3823726  | 3823956  | CREBBP      |
| chr16 | 3824544  | 3824719  | CREBBP      |
| chr16 | 3827588  | 3827683  | CREBBP      |
| chr16 | 3827986  | 3828208  | CREBBP      |
| chr16 | 3828675  | 3828843  | CREBBP      |
| chr16 | 3830707  | 3830904  | CREBBP      |
| chr16 | 3831179  | 3831332  | CREBBP      |
| chr16 | 3832659  | 3832952  | CREBBP      |
| chr16 | 3841956  | 3842120  | CREBBP      |
| chr16 | 3843361  | 3843652  | CREBBP      |
| chr16 | 3860578  | 3860805  | CREBBP      |
| chr16 | 3900272  | 3901035  | CREBBP      |
| chr16 | 3929807  | 3930146  | CREBBP      |
| chr16 | 11348674 | 11349360 | RM12, SOCS1 |
| chr16 | 28617116 | 28617279 | SULT1A1     |
| chr16 | 28617351 | 28617582 | SULT1A1     |
| chr16 | 28618056 | 28618201 | SULT1A1     |
| chr16 | 28618246 | 28618423 | SULT1A1     |
| chr16 | 28619586 | 28619734 | SULT1A1     |
| chr16 | 28619773 | 28619949 | SULT1A1     |
| chr16 | 28620003 | 28620201 | SULT1A1     |
| chr16 | 28631358 | 28631479 | SULT1A1     |
| chr16 | 28634426 | 28634543 | SULT1A1     |
| chr16 | 31102429 | 31102688 | VKORC1      |
| chr16 | 31104078 | 31104210 | VKORC1      |
| chr16 | 31104607 | 31104828 | VKORC1      |
| chr16 | 31105530 | 31105847 | VKORC1      |
| chr16 | 31105852 | 31106075 | VKORC1      |
| chr16 | 31106684 | 31107004 | VKORC1      |
| chr16 | 50783584 | 50784138 | CYLD        |
| chr16 | 50785489 | 50785842 | CYLD        |
| chr16 | 50788204 | 50788401 | CYLD        |
| chr16 | 50809051 | 50809110 | CYLD        |
| chr16 | 50810055 | 50810213 | CYLD        |
| chr16 | 50811710 | 50811877 | CYLD        |
| chr16 | 50813550 | 50813980 | CYLD        |
| chr16 | 50815131 | 50815347 | CYLD        |
| chr16 | 50816210 | 50816402 | CYLD        |
| chr16 | 50818214 | 50818387 | CYLD        |
| chr16 | 50820740 | 50820882 | CYLD        |
| chr16 | 50821671 | 50821788 | CYLD        |
| chr16 | 50825443 | 50825626 | CYLD        |
| chr16 | 50826482 | 50826641 | CYLD        |
| chr16 | 50827431 | 50827600 | CYLD        |
| chr16 | 50828097 | 50828364 | CYLD        |
| chr16 | 50830209 | 50830444 | CYLD        |
| chr16 | 66413215 | 66413475 | CDH5        |
| chr16 | 66420686 | 66421025 | CDH5        |
| chr16 | 66422201 | 66422368 | CDH5        |
| chr16 | 66423235 | 66423450 | CDH5        |
| chr16 | 66424280 | 66424518 | CDH5        |
| chr16 | 66426013 | 66426311 | CDH5        |
| chr16 | 66429936 | 66430129 | CDH5        |
| chr16 | 66431859 | 66432034 | CDH5        |
| chr16 | 66432333 | 66432489 | CDH5        |
| chr16 | 66434648 | 66434944 | CDH5        |
| chr16 | 66436529 | 66437097 | CDH5        |
| chr16 | 67063285 | 67063413 | CBFB        |
| chr16 | 67063604 | 67063741 | CBFB        |
| chr16 | 67070516 | 67070683 | CBFB        |
| chr16 | 67100559 | 67100726 | CBFB        |
| chr16 | 67116090 | 67116267 | CBFB        |
| chr16 | 67132587 | 67132706 | CBFB        |
| chr16 | 67644710 | 67645541 | CTCF        |
| chr16 | 67645828 | 67646049 | CTCF        |
| chr16 | 67650622 | 67650806 | CTCF        |
| chr16 | 67654574 | 67654745 | CTCF        |
| chr16 | 67655319 | 67655519 | CTCF        |
| chr16 | 67660432 | 67660643 | CTCF        |
| chr16 | 67662247 | 67662480 | CTCF        |
| chr16 | 67663275 | 67663461 | CTCF        |
| chr16 | 67670567 | 67670779 | CTCF        |
| chr16 | 67671565 | 67671800 | CTCF        |
| chr16 | 68771293 | 68771391 | CDH1        |
| chr16 | 68772174 | 68772339 | CDH1        |
| chr16 | 68835547 | 68835821 | CDH1        |
| chr16 | 68842301 | 68842495 | CDH1        |
| chr16 | 68842570 | 68842776 | CDH1        |
| chr16 | 68844074 | 68844269 | CDH1        |
| chr16 | 68845561 | 68845787 | CDH1        |
| chr16 | 68846012 | 68846191 | CDH1        |
| chr16 | 68847190 | 68847490 | CDH1        |
| chr16 | 68849392 | 68849687 | CDH1        |
| chr16 | 68853157 | 68853353 | CDH1        |
| chr16 | 68855878 | 68856153 | CDH1        |
| chr16 | 68857276 | 68857554 | CDH1        |
| chr16 | 68862051 | 68862232 | CDH1        |
| chr16 | 68863531 | 68863725 | CDH1        |
| chr16 | 68867167 | 68867427 | CDH1        |
| chr16 | 68868080 | 68868209 | CDH1        |
| chr16 | 69744853 | 69745209 | NQO1        |
| chr16 | 69746905 | 69747057 | NQO1        |
| chr16 | 69748841 | 69749005 | NQO1        |

|       |          |          |                   |
|-------|----------|----------|-------------------|
| chr16 | 69752000 | 69752181 | NQO1              |
| chr16 | 69752247 | 69752462 | NQO1              |
| chr16 | 69760310 | 69760367 | NQO1              |
| chr16 | 71674777 | 71674968 | MARVELD3, PHLPP2  |
| chr16 | 71678679 | 71678783 | PHLPP2            |
| chr16 | 71682767 | 71683972 | PHLPP2            |
| chr16 | 71686667 | 71686949 | PHLPP2            |
| chr16 | 71689117 | 71689362 | PHLPP2            |
| chr16 | 71690448 | 71690609 | PHLPP2            |
| chr16 | 71692110 | 71692291 | PHLPP2            |
| chr16 | 71692530 | 71692743 | PHLPP2            |
| chr16 | 71697776 | 71698027 | PHLPP2            |
| chr16 | 71701055 | 71701261 | PHLPP2            |
| chr16 | 71703152 | 71703298 | PHLPP2            |
| chr16 | 71706139 | 71706250 | PHLPP2            |
| chr16 | 71710324 | 71710577 | PHLPP2            |
| chr16 | 71712628 | 71712913 | PHLPP2            |
| chr16 | 71713266 | 71713463 | PHLPP2            |
| chr16 | 71715628 | 71715833 | PHLPP2            |
| chr16 | 71718353 | 71718529 | PHLPP2            |
| chr16 | 71724396 | 71724637 | PHLPP2            |
| chr16 | 71736475 | 71736659 | PHLPP2            |
| chr16 | 71748389 | 71748723 | PHLPP2            |
| chr16 | 89804983 | 89805141 | FANCA, ZNF276     |
| chr16 | 89805264 | 89805407 | FANCA, ZNF276     |
| chr16 | 89805515 | 89805722 | FANCA, ZNF276     |
| chr16 | 89805860 | 89805986 | FANCA, ZNF276     |
| chr16 | 89806272 | 89806532 | FANCA, ZNF276     |
| chr16 | 89807186 | 89807299 | FANCA, ZNF276     |
| chr16 | 89809182 | 89809371 | FANCA             |
| chr16 | 89811341 | 89811504 | FANCA             |
| chr16 | 89812966 | 89813121 | FANCA             |
| chr16 | 89813213 | 89813323 | FANCA             |
| chr16 | 89815041 | 89815200 | FANCA             |
| chr16 | 89816112 | 89816335 | FANCA             |
| chr16 | 89818520 | 89818655 | FANCA             |
| chr16 | 89824959 | 89825138 | FANCA             |
| chr16 | 89828331 | 89828455 | FANCA             |
| chr16 | 89831272 | 89831499 | FANCA             |
| chr16 | 89833523 | 89833670 | FANCA             |
| chr16 | 89836219 | 89836457 | FANCA             |
| chr16 | 89836548 | 89836692 | FANCA             |
| chr16 | 89836946 | 89837067 | FANCA             |
| chr16 | 89838060 | 89838247 | FANCA             |
| chr16 | 89839653 | 89839817 | FANCA             |
| chr16 | 89842124 | 89842248 | FANCA             |
| chr16 | 89845183 | 89845283 | FANCA             |
| chr16 | 89845325 | 89845436 | FANCA             |
| chr16 | 89846251 | 89846390 | FANCA             |
| chr16 | 89849241 | 89849351 | FANCA             |
| chr16 | 89849389 | 89849535 | FANCA             |
| chr16 | 89851236 | 89851397 | FANCA             |
| chr16 | 89857785 | 89857969 | FANCA             |
| chr16 | 89858309 | 89858501 | FANCA             |
| chr16 | 89858853 | 89858980 | FANCA             |
| chr16 | 89862288 | 89862451 | FANCA             |
| chr16 | 89865440 | 89865512 | FANCA             |
| chr16 | 89865548 | 89865665 | FANCA             |
| chr16 | 89865987 | 89866071 | FANCA             |
| chr16 | 89869641 | 89869774 | FANCA             |
| chr16 | 89871662 | 89871825 | FANCA             |
| chr16 | 89874676 | 89874800 | FANCA             |
| chr16 | 89877089 | 89877235 | FANCA             |
| chr16 | 89877311 | 89877504 | FANCA             |
| chr16 | 89880902 | 89881046 | FANCA             |
| chr16 | 89882259 | 89882419 | FANCA             |
| chr16 | 89882919 | 89883048 | FANCA             |
| chr17 | 7565231  | 7565357  | TP53              |
| chr17 | 7569498  | 7569587  | TP53              |
| chr17 | 7572901  | 7573033  | TP53              |
| chr17 | 7573901  | 7574058  | TP53              |
| chr17 | 7576511  | 7576682  | TP53              |
| chr17 | 7576827  | 7576951  | TP53              |
| chr17 | 7576993  | 7577180  | TP53              |
| chr17 | 7577473  | 7577633  | TP53              |
| chr17 | 7578112  | 7578314  | TP53              |
| chr17 | 7578345  | 7578579  | TP53              |
| chr17 | 7579286  | 7579615  | TP53              |
| chr17 | 7579674  | 7579746  | TP53              |
| chr17 | 7579813  | 7579937  | TP53              |
| chr17 | 8108163  | 8108387  | AURKB             |
| chr17 | 8108508  | 8108733  | AURKB             |
| chr17 | 8109783  | 8109982  | AURKB             |
| chr17 | 8110042  | 8110231  | AURKB             |
| chr17 | 8110468  | 8110713  | AURKB             |
| chr17 | 8110863  | 8110968  | AURKB             |
| chr17 | 8111030  | 8111183  | AURKB             |
| chr17 | 8113469  | 8113567  | AURKB             |
| chr17 | 11924178 | 11924343 | MAP2K4, RPL21P122 |
| chr17 | 11935557 | 11935640 | MAP2K4            |
| chr17 | 11958180 | 11958333 | MAP2K4            |
| chr17 | 11984647 | 11984872 | MAP2K4            |
| chr17 | 11998744 | 11998803 | MAP2K4            |
| chr17 | 11998866 | 11999036 | MAP2K4            |
| chr17 | 12011081 | 12011251 | MAP2K4            |
| chr17 | 12013666 | 12013768 | MAP2K4            |

|       |          |          |        |
|-------|----------|----------|--------|
| chr17 | 12016524 | 12016702 | MAP2K4 |
| chr17 | 12028585 | 12028713 | MAP2K4 |
| chr17 | 12032430 | 12032629 | MAP2K4 |
| chr17 | 12043130 | 12043226 | MAP2K4 |
| chr17 | 12044438 | 12044602 | MAP2K4 |
| chr17 | 17116943 | 17117195 | FLCN   |
| chr17 | 17118273 | 17118429 | FLCN   |
| chr17 | 17118473 | 17118655 | FLCN   |
| chr17 | 17119668 | 17119842 | FLCN   |
| chr17 | 17120357 | 17120521 | FLCN   |
| chr17 | 17122307 | 17122548 | FLCN   |
| chr17 | 17124667 | 17124967 | FLCN   |
| chr17 | 17125789 | 17126000 | FLCN   |
| chr17 | 17127210 | 17127482 | FLCN   |
| chr17 | 17129266 | 17129661 | FLCN   |
| chr17 | 17131177 | 17131476 | FLCN   |
| chr17 | 29422302 | 29422412 | NF1    |
| chr17 | 29482975 | 29483169 | NF1    |
| chr17 | 29486002 | 29486136 | NF1    |
| chr17 | 29490178 | 29490419 | NF1    |
| chr17 | 29496883 | 29497040 | NF1    |
| chr17 | 29508414 | 29508532 | NF1    |
| chr17 | 29508702 | 29508828 | NF1    |
| chr17 | 29509500 | 29509708 | NF1    |
| chr17 | 29527414 | 29527638 | NF1    |
| chr17 | 29528029 | 29528202 | NF1    |
| chr17 | 29528403 | 29528528 | NF1    |
| chr17 | 29533232 | 29533414 | NF1    |
| chr17 | 29541443 | 29541628 | NF1    |
| chr17 | 29545997 | 29546161 | NF1    |
| chr17 | 29548842 | 29549033 | NF1    |
| chr17 | 29550436 | 29550610 | NF1    |
| chr17 | 29552087 | 29552293 | NF1    |
| chr17 | 29553427 | 29553727 | NF1    |
| chr17 | 29554210 | 29554334 | NF1    |
| chr17 | 29554515 | 29554649 | NF1    |
| chr17 | 29556017 | 29556508 | NF1    |
| chr17 | 29556827 | 29557017 | NF1    |
| chr17 | 29557252 | 29557425 | NF1    |
| chr17 | 29557834 | 29557968 | NF1    |
| chr17 | 29559065 | 29559232 | NF1    |
| chr17 | 29559692 | 29559924 | NF1    |
| chr17 | 29559994 | 29560256 | NF1    |
| chr17 | 29562603 | 29562815 | NF1    |
| chr17 | 29562910 | 29563064 | NF1    |
| chr17 | 29575976 | 29576162 | NF1    |
| chr17 | 29579930 | 29580043 | NF1    |
| chr17 | 29585336 | 29585545 | NF1    |
| chr17 | 29586024 | 29586172 | NF1    |
| chr17 | 29587361 | 29587558 | NF1    |
| chr17 | 29588703 | 29588900 | NF1    |
| chr17 | 29592221 | 29592382 | NF1    |
| chr17 | 29652812 | 29653295 | NF1    |
| chr17 | 29654491 | 29654882 | NF1    |
| chr17 | 29657288 | 29657541 | NF1    |
| chr17 | 29661830 | 29662074 | NF1    |
| chr17 | 29663325 | 29663516 | NF1    |
| chr17 | 29663627 | 29663957 | NF1    |
| chr17 | 29664360 | 29664625 | NF1    |
| chr17 | 29664811 | 29664923 | NF1    |
| chr17 | 29664994 | 29665182 | NF1    |
| chr17 | 29665696 | 29665848 | NF1    |
| chr17 | 29667497 | 29667688 | NF1    |
| chr17 | 29670001 | 29670178 | NF1    |
| chr17 | 29676112 | 29676294 | NF1    |
| chr17 | 29677175 | 29677361 | NF1    |
| chr17 | 29679249 | 29679457 | NF1    |
| chr17 | 29683452 | 29683625 | NF1    |
| chr17 | 29683952 | 29684133 | NF1    |
| chr17 | 29684261 | 29684412 | NF1    |
| chr17 | 29685472 | 29685665 | NF1    |
| chr17 | 29685961 | 29686058 | NF1    |
| chr17 | 29687479 | 29687746 | NF1    |
| chr17 | 29701005 | 29701198 | NF1    |
| chr17 | 29705880 | 29705974 | NF1    |
| chr17 | 37618299 | 37619395 | CDK12  |
| chr17 | 37627106 | 37628041 | CDK12  |
| chr17 | 37646784 | 37647011 | CDK12  |
| chr17 | 37648978 | 37649168 | CDK12  |
| chr17 | 37650751 | 37650972 | CDK12  |
| chr17 | 37657477 | 37657717 | CDK12  |
| chr17 | 37665932 | 37666039 | CDK12  |
| chr17 | 37667756 | 37667908 | CDK12  |
| chr17 | 37671958 | 37672086 | CDK12  |
| chr17 | 37673667 | 37673834 | CDK12  |
| chr17 | 37676183 | 37676365 | CDK12  |
| chr17 | 37680901 | 37681163 | CDK12  |
| chr17 | 37682091 | 37682594 | CDK12  |
| chr17 | 37686831 | 37687594 | CDK12  |
| chr17 | 37855787 | 37855865 | ERBB2  |
| chr17 | 37856466 | 37856589 | ERBB2  |
| chr17 | 37863217 | 37863419 | ERBB2  |
| chr17 | 37864548 | 37864812 | ERBB2  |
| chr17 | 37865545 | 37865730 | ERBB2  |
| chr17 | 37866040 | 37866159 | ERBB2  |
| chr17 | 37866313 | 37866479 | ERBB2  |

|       |          |          |                |
|-------|----------|----------|----------------|
| chr17 | 37866567 | 37866759 | ERBB2          |
| chr17 | 37868155 | 37868325 | ERBB2          |
| chr17 | 37868549 | 37868726 | ERBB2          |
| chr17 | 37871513 | 37871637 | ERBB2          |
| chr17 | 37871673 | 37871814 | ERBB2          |
| chr17 | 37871967 | 37872217 | ERBB2          |
| chr17 | 37872528 | 37872711 | ERBB2          |
| chr17 | 37872742 | 37872883 | ERBB2          |
| chr17 | 37873547 | 37873762 | ERBB2          |
| chr17 | 37876014 | 37876112 | ERBB2          |
| chr17 | 37879546 | 37879735 | ERBB2          |
| chr17 | 37879765 | 37879938 | ERBB2          |
| chr17 | 37880139 | 37880288 | ERBB2          |
| chr17 | 37880953 | 37881189 | ERBB2          |
| chr17 | 37881276 | 37881482 | ERBB2          |
| chr17 | 37881554 | 37881680 | ERBB2          |
| chr17 | 37881934 | 37882131 | ERBB2          |
| chr17 | 37882789 | 37882937 | ERBB2, MIR4728 |
| chr17 | 37883042 | 37883281 | ERBB2          |
| chr17 | 37883522 | 37883825 | ERBB2          |
| chr17 | 37883916 | 37884322 | ERBB2          |
| chr17 | 38487445 | 38487673 | RARA           |
| chr17 | 38497616 | 38497892 | RARA           |
| chr17 | 38498931 | 38499144 | RARA           |
| chr17 | 38504542 | 38504741 | RARA           |
| chr17 | 38506010 | 38506202 | RARA           |
| chr17 | 38508136 | 38508347 | RARA           |
| chr17 | 38508557 | 38508784 | RARA           |
| chr17 | 38510528 | 38510783 | RARA           |
| chr17 | 38511489 | 38511698 | RARA           |
| chr17 | 38512235 | 38513041 | RARA           |
| chr17 | 38545745 | 38545924 | TOP2A          |
| chr17 | 38546191 | 38546441 | TOP2A          |
| chr17 | 38547732 | 38547917 | TOP2A          |
| chr17 | 38548294 | 38548422 | TOP2A          |
| chr17 | 38548440 | 38548618 | TOP2A          |
| chr17 | 38548811 | 38549014 | TOP2A          |
| chr17 | 38551675 | 38551816 | TOP2A          |
| chr17 | 38552509 | 38552742 | TOP2A          |
| chr17 | 38554784 | 38554918 | TOP2A          |
| chr17 | 38554999 | 38555214 | TOP2A          |
| chr17 | 38555266 | 38555408 | TOP2A          |
| chr17 | 38556098 | 38556344 | TOP2A          |
| chr17 | 38556435 | 38556686 | TOP2A          |
| chr17 | 38556755 | 38556940 | TOP2A          |
| chr17 | 38557076 | 38557358 | TOP2A          |
| chr17 | 38559132 | 38559331 | TOP2A          |
| chr17 | 38560378 | 38560550 | TOP2A          |
| chr17 | 38560603 | 38560768 | TOP2A          |
| chr17 | 38561017 | 38561160 | TOP2A          |
| chr17 | 38562610 | 38562770 | TOP2A          |
| chr17 | 38562810 | 38562966 | TOP2A          |
| chr17 | 38563058 | 38563219 | TOP2A          |
| chr17 | 38563775 | 38563951 | TOP2A          |
| chr17 | 38564193 | 38564401 | TOP2A          |
| chr17 | 38564718 | 38565012 | TOP2A          |
| chr17 | 38565087 | 38565175 | TOP2A          |
| chr17 | 38565379 | 38565478 | TOP2A          |
| chr17 | 38565612 | 38565692 | TOP2A          |
| chr17 | 38565701 | 38565910 | TOP2A          |
| chr17 | 38566189 | 38566339 | TOP2A          |
| chr17 | 38567335 | 38567523 | TOP2A          |
| chr17 | 38567580 | 38567761 | TOP2A          |
| chr17 | 38567771 | 38568095 | TOP2A          |
| chr17 | 38568985 | 38569248 | TOP2A          |
| chr17 | 38569378 | 38569569 | TOP2A          |
| chr17 | 38569706 | 38569902 | TOP2A          |
| chr17 | 38572231 | 38572345 | TOP2A          |
| chr17 | 38572648 | 38572789 | TOP2A          |
| chr17 | 38572966 | 38573172 | TOP2A          |
| chr17 | 38573997 | 38574068 | TOP2A          |
| chr17 | 38574365 | 38574433 |                |
| chr17 | 40467737 | 40467843 | STAT3          |
| chr17 | 40468781 | 40468944 | STAT3          |
| chr17 | 40469174 | 40469267 | STAT3          |
| chr17 | 40474274 | 40474537 | STAT3          |
| chr17 | 40474996 | 40475186 | STAT3          |
| chr17 | 40475252 | 40475397 | STAT3          |
| chr17 | 40475565 | 40475668 | STAT3          |
| chr17 | 40476703 | 40476889 | STAT3          |
| chr17 | 40476955 | 40477104 | STAT3          |
| chr17 | 40478108 | 40478242 | STAT3          |
| chr17 | 40481402 | 40481500 | STAT3          |
| chr17 | 40481546 | 40481690 | STAT3          |
| chr17 | 40481739 | 40481819 | STAT3          |
| chr17 | 40483464 | 40483574 | STAT3          |
| chr17 | 40485665 | 40485808 | STAT3          |
| chr17 | 40485883 | 40486092 | STAT3          |
| chr17 | 40489427 | 40489629 | STAT3          |
| chr17 | 40489755 | 40489900 | STAT3          |
| chr17 | 40490723 | 40490855 | STAT3          |
| chr17 | 40491306 | 40491452 | STAT3          |
| chr17 | 40497551 | 40497700 | STAT3          |
| chr17 | 40498561 | 40498756 | STAT3          |
| chr17 | 40500381 | 40500559 | STAT3          |
| chr17 | 41197669 | 41197844 | BRCA1          |

|       |          |          |                       |
|-------|----------|----------|-----------------------|
| chr17 | 41199634 | 41199745 | BRCA1                 |
| chr17 | 41201112 | 41201236 | BRCA1                 |
| chr17 | 41203054 | 41203159 | BRCA1                 |
| chr17 | 41209043 | 41209177 | BRCA1                 |
| chr17 | 41215324 | 41215415 | BRCA1                 |
| chr17 | 41215865 | 41215993 | BRCA1                 |
| chr17 | 41219599 | 41219737 | BRCA1                 |
| chr17 | 41222919 | 41223280 | BRCA1                 |
| chr17 | 41226322 | 41226563 | BRCA1                 |
| chr17 | 41228479 | 41228656 | BRCA1                 |
| chr17 | 41231325 | 41231441 | BRCA1, RPL21P4        |
| chr17 | 41234395 | 41234617 | BRCA1                 |
| chr17 | 41242935 | 41243074 | BRCA1                 |
| chr17 | 41243426 | 41246902 | BRCA1                 |
| chr17 | 41247837 | 41247964 | BRCA1                 |
| chr17 | 41249235 | 41249331 | BRCA1                 |
| chr17 | 41251766 | 41251922 | BRCA1                 |
| chr17 | 41256113 | 41256303 | BRCA1                 |
| chr17 | 41256859 | 41256998 | BRCA1                 |
| chr17 | 41258447 | 41258575 | BRCA1                 |
| chr17 | 41267717 | 41267821 | BRCA1                 |
| chr17 | 41276008 | 41276138 | BRCA1                 |
| chr17 | 47677714 | 47677909 | SPOP                  |
| chr17 | 47679201 | 47679394 | SPOP                  |
| chr17 | 47684586 | 47684759 | SPOP                  |
| chr17 | 47685210 | 47685316 | SPOP                  |
| chr17 | 47688616 | 47688844 | SPOP                  |
| chr17 | 47696317 | 47696495 | SPOP                  |
| chr17 | 47696570 | 47696772 | SPOP                  |
| chr17 | 47699282 | 47699454 | SPOP                  |
| chr17 | 47700069 | 47700197 | SPOP                  |
| chr17 | 59760631 | 59761526 | BRIP1                 |
| chr17 | 59763171 | 59763551 | BRIP1                 |
| chr17 | 59770765 | 59770898 | BRIP1                 |
| chr17 | 59793286 | 59793449 | BRIP1                 |
| chr17 | 59820348 | 59820520 | BRIP1                 |
| chr17 | 59821767 | 59821977 | BRIP1                 |
| chr17 | 59853736 | 59853948 | BRIP1                 |
| chr17 | 59857596 | 59857787 | BRIP1                 |
| chr17 | 59858175 | 59858391 | BRIP1                 |
| chr17 | 59861605 | 59861810 | BRIP1                 |
| chr17 | 59870932 | 59871115 | BRIP1                 |
| chr17 | 59876435 | 59876685 | BRIP1                 |
| chr17 | 59878588 | 59878860 | BRIP1                 |
| chr17 | 59885802 | 59886143 | BRIP1                 |
| chr17 | 59924436 | 59924606 | BRIP1                 |
| chr17 | 59926464 | 59926642 | BRIP1                 |
| chr17 | 59934393 | 59934617 | BRIP1                 |
| chr17 | 59937131 | 59937293 | BRIP1                 |
| chr17 | 59938782 | 59938925 | BRIP1                 |
| chr17 | 61554430 | 61554729 | ACE                   |
| chr17 | 61555266 | 61555484 | ACE                   |
| chr17 | 61556342 | 61556486 | ACE                   |
| chr17 | 61557104 | 61557298 | ACE                   |
| chr17 | 61557672 | 61557914 | ACE                   |
| chr17 | 61558426 | 61558574 | ACE                   |
| chr17 | 61558901 | 61559124 | ACE                   |
| chr17 | 61559801 | 61560075 | ACE                   |
| chr17 | 61560364 | 61560559 | ACE                   |
| chr17 | 61560795 | 61560944 | ACE                   |
| chr17 | 61561184 | 61561357 | ACE                   |
| chr17 | 61561665 | 61561927 | ACE                   |
| chr17 | 61562203 | 61562452 | ACE                   |
| chr17 | 61562571 | 61562758 | ACE                   |
| chr17 | 61563892 | 61564101 | ACE                   |
| chr17 | 61564321 | 61564459 | ACE                   |
| chr17 | 61565983 | 61566177 | ACE                   |
| chr17 | 61566276 | 61566518 | ACE                   |
| chr17 | 61568289 | 61568437 | ACE                   |
| chr17 | 61568544 | 61568767 | ACE                   |
| chr17 | 61570771 | 61571045 | ACE                   |
| chr17 | 61571257 | 61571452 | ACE                   |
| chr17 | 61571707 | 61571856 | ACE                   |
| chr17 | 61573729 | 61573902 | ACE                   |
| chr17 | 61574133 | 61574371 | ACE                   |
| chr17 | 61574472 | 61574752 | ACE                   |
| chr17 | 61574868 | 61574946 | ACE                   |
| chr17 | 62006560 | 62006709 | CD79B                 |
| chr17 | 62006768 | 62006860 | CD79B                 |
| chr17 | 62007104 | 62007273 | CD79B                 |
| chr17 | 62007408 | 62007770 | CD79B                 |
| chr17 | 62008669 | 62008773 | CD79B                 |
| chr17 | 62009529 | 62009646 | CD79B                 |
| chr17 | 70117507 | 70117988 | SOX9                  |
| chr17 | 70118834 | 70119138 | SOX9                  |
| chr17 | 70119658 | 70120553 | SOX9                  |
| chr17 | 74731914 | 74731982 | MFSD11, SRSF2         |
| chr17 | 74732210 | 74732571 | MFSD11, MIR636, SRSF2 |
| chr17 | 74732855 | 74733348 | MFSD11, SRSF2         |
| chr17 | 78519404 | 78519616 | RPTOR                 |
| chr17 | 78599465 | 78599618 | RPTOR                 |
| chr17 | 78617502 | 78617635 | RPTOR                 |
| chr17 | 78681615 | 78681824 | RPTOR                 |
| chr17 | 78704334 | 78704531 | RPTOR                 |
| chr17 | 78727784 | 78728010 | RPTOR                 |
| chr17 | 78765224 | 78765334 | RPTOR                 |

|       |          |          |              |
|-------|----------|----------|--------------|
| chr17 | 78795975 | 78796126 | RPTOR        |
| chr17 | 78796853 | 78797048 | RPTOR        |
| chr17 | 78811696 | 78811822 | RPTOR        |
| chr17 | 78820247 | 78820399 | RPTOR        |
| chr17 | 78829238 | 78829372 | RPTOR        |
| chr17 | 78831564 | 78831761 | RPTOR        |
| chr17 | 78854189 | 78854314 | RPTOR        |
| chr17 | 78857193 | 78857309 | RPTOR        |
| chr17 | 78857555 | 78857797 | RPTOR        |
| chr17 | 78858782 | 78858973 | RPTOR        |
| chr17 | 78865494 | 78865662 | RPTOR        |
| chr17 | 78866503 | 78866694 | RPTOR        |
| chr17 | 78867481 | 78867690 | RPTOR        |
| chr17 | 78882585 | 78882754 | RPTOR        |
| chr17 | 78896498 | 78896652 | RPTOR        |
| chr17 | 78897264 | 78897498 | RPTOR        |
| chr17 | 78899144 | 78899305 | RPTOR        |
| chr17 | 78914270 | 78914426 | RPTOR        |
| chr17 | 78919441 | 78919606 | RPTOR        |
| chr17 | 78921001 | 78921176 | RPTOR        |
| chr17 | 78923217 | 78923372 | RPTOR        |
| chr17 | 78931398 | 78931555 | RPTOR        |
| chr17 | 78933852 | 78934030 | RPTOR        |
| chr17 | 78935168 | 78935305 | RPTOR        |
| chr17 | 78936235 | 78936402 | RPTOR        |
| chr17 | 78936702 | 78936882 | RPTOR        |
| chr17 | 78938036 | 78938155 | RPTOR        |
| chr18 | 657717   | 657972   | TYMS, TYMSOS |
| chr18 | 659615   | 659739   | TYMS         |
| chr18 | 662120   | 662345   | TYMS         |
| chr18 | 669046   | 669198   | TYMS         |
| chr18 | 670666   | 670892   | TYMS         |
| chr18 | 671354   | 671476   | TYMS         |
| chr18 | 672834   | 673022   | ENOSF1, TYMS |
| chr18 | 19751080 | 19752265 | GATA6        |
| chr18 | 19756890 | 19757107 | GATA6        |
| chr18 | 19761388 | 19761564 | GATA6        |
| chr18 | 19762692 | 19762830 | GATA6        |
| chr18 | 19762875 | 19763029 | GATA6        |
| chr18 | 19780593 | 19780811 | GATA6        |
| chr18 | 25532091 | 25532348 | CDH2         |
| chr18 | 25543295 | 25543510 | CDH2         |
| chr18 | 25562882 | 25563072 | CDH2         |
| chr18 | 25564938 | 25565222 | CDH2         |
| chr18 | 25565466 | 25565750 | CDH2         |
| chr18 | 25568462 | 25568655 | CDH2         |
| chr18 | 25570035 | 25570339 | CDH2         |
| chr18 | 25572593 | 25572829 | CDH2         |
| chr18 | 25573438 | 25573626 | CDH2         |
| chr18 | 25582935 | 25583158 | CDH2         |
| chr18 | 25585787 | 25585982 | CDH2         |
| chr18 | 25589655 | 25589861 | CDH2         |
| chr18 | 25591784 | 25591981 | CDH2         |
| chr18 | 25593621 | 25593898 | CDH2         |
| chr18 | 25616408 | 25616537 | CDH2         |
| chr18 | 25727611 | 25727773 | CDH2         |
| chr18 | 25756901 | 25757011 | CDH2         |
| chr18 | 45368172 | 45368346 | SMAD2        |
| chr18 | 45371685 | 45371880 | SMAD2        |
| chr18 | 45372008 | 45372196 | SMAD2        |
| chr18 | 45374820 | 45375083 | SMAD2        |
| chr18 | 45377619 | 45377723 | SMAD2        |
| chr18 | 45391404 | 45391529 | SMAD2        |
| chr18 | 45394668 | 45394853 | SMAD2        |
| chr18 | 45395588 | 45395832 | SMAD2        |
| chr18 | 45396820 | 45396960 | SMAD2        |
| chr18 | 45422866 | 45423152 | SMAD2        |
| chr18 | 48573391 | 48573690 | SMAD4        |
| chr18 | 48575030 | 48575255 | SMAD4        |
| chr18 | 48575639 | 48575719 | SMAD4        |
| chr18 | 48577698 | 48577810 | SMAD4        |
| chr18 | 48578979 | 48579047 | SMAD4        |
| chr18 | 48581125 | 48581388 | SMAD4        |
| chr18 | 48584469 | 48584639 | SMAD4        |
| chr18 | 48584684 | 48584851 | SMAD4        |
| chr18 | 48586210 | 48586311 | SMAD4        |
| chr18 | 48591767 | 48592001 | SMAD4        |
| chr18 | 48593363 | 48593582 | SMAD4        |
| chr18 | 48602982 | 48603171 | SMAD4        |
| chr18 | 48604600 | 48604862 | SMAD4        |
| chr18 | 59157761 | 59158057 | CDH20        |
| chr18 | 59166393 | 59166738 | CDH20        |
| chr18 | 59167590 | 59167760 | CDH20        |
| chr18 | 59170160 | 59170378 | CDH20        |
| chr18 | 59174580 | 59174818 | CDH20        |
| chr18 | 59195174 | 59195478 | CDH20        |
| chr18 | 59203700 | 59203887 | CDH20        |
| chr18 | 59206231 | 59206403 | CDH20        |
| chr18 | 59212234 | 59212402 | CDH20        |
| chr18 | 59217185 | 59217487 | CDH20        |
| chr18 | 59221397 | 59221953 | CDH20        |
| chr18 | 60795832 | 60796017 | BCL2         |
| chr18 | 60985256 | 60985924 | BCL2         |
| chr19 | 1206887  | 1207227  | STK11        |
| chr19 | 1218390  | 1218524  | STK11        |
| chr19 | 1219297  | 1219437  | STK11        |



|       |          |          |         |
|-------|----------|----------|---------|
| chr19 | 1220346  | 1220529  | STK11   |
| chr19 | 1220554  | 1220741  | STK11   |
| chr19 | 1221186  | 1221364  | STK11   |
| chr19 | 1221922  | 1222030  | STK11   |
| chr19 | 1222958  | 1223196  | STK11   |
| chr19 | 1226427  | 1226671  | STK11   |
| chr19 | 2164158  | 2164289  | DOT1L   |
| chr19 | 2180686  | 2180780  | DOT1L   |
| chr19 | 2185828  | 2185953  | DOT1L   |
| chr19 | 2189705  | 2189819  | DOT1L   |
| chr19 | 2190985  | 2191264  | DOT1L   |
| chr19 | 2193662  | 2193807  | DOT1L   |
| chr19 | 2194488  | 2194601  | DOT1L   |
| chr19 | 2199857  | 2199963  | DOT1L   |
| chr19 | 2202673  | 2202803  | DOT1L   |
| chr19 | 2206702  | 2206821  | DOT1L   |
| chr19 | 2207547  | 2207704  | DOT1L   |
| chr19 | 2208908  | 2209000  | DOT1L   |
| chr19 | 2210373  | 2210534  | DOT1L   |
| chr19 | 2210594  | 2210879  | DOT1L   |
| chr19 | 2211072  | 2211236  | DOT1L   |
| chr19 | 2211724  | 2211866  | DOT1L   |
| chr19 | 2213512  | 2213664  | DOT1L   |
| chr19 | 2213822  | 2214010  | DOT1L   |
| chr19 | 2214444  | 2214620  | DOT1L   |
| chr19 | 2216254  | 2216789  | DOT1L   |
| chr19 | 2216928  | 2217114  | DOT1L   |
| chr19 | 2217745  | 2217942  | DOT1L   |
| chr19 | 2220081  | 2220246  | DOT1L   |
| chr19 | 2221949  | 2222583  | DOT1L   |
| chr19 | 2223254  | 2223510  | DOT1L   |
| chr19 | 2225361  | 2225476  | DOT1L   |
| chr19 | 2226156  | 2227151  | DOT1L   |
| chr19 | 2227190  | 2227246  | DOT1L   |
| chr19 | 2227710  | 2228371  | DOT1L   |
| chr19 | 2229758  | 2229816  | DOT1L   |
| chr19 | 3094624  | 3094810  | GNA11   |
| chr19 | 3110121  | 3110356  | GNA11   |
| chr19 | 3113302  | 3113507  | GNA11   |
| chr19 | 3114916  | 3115095  | GNA11   |
| chr19 | 3118896  | 3119076  | GNA11   |
| chr19 | 3119178  | 3119382  | GNA11   |
| chr19 | 3120961  | 3121202  | GNA11   |
| chr19 | 4090570  | 4090731  | MAP2K2  |
| chr19 | 4094425  | 4094521  | MAP2K2  |
| chr19 | 4095360  | 4095472  | MAP2K2  |
| chr19 | 4097251  | 4097366  | MAP2K2  |
| chr19 | 4099173  | 4099437  | MAP2K2  |
| chr19 | 4100991  | 4101166  | MAP2K2  |
| chr19 | 4101201  | 4101303  | MAP2K2  |
| chr19 | 4102348  | 4102476  | MAP2K2  |
| chr19 | 4110481  | 4110678  | MAP2K2  |
| chr19 | 4117391  | 4117652  | MAP2K2  |
| chr19 | 4123755  | 4123897  | MAP2K2  |
| chr19 | 7117041  | 7117446  | INSR    |
| chr19 | 7119434  | 7119619  | INSR    |
| chr19 | 7120605  | 7120785  | INSR    |
| chr19 | 7122599  | 7122809  | INSR    |
| chr19 | 7122864  | 7123025  | INSR    |
| chr19 | 7125268  | 7125563  | INSR    |
| chr19 | 7126569  | 7126687  | INSR    |
| chr19 | 7128837  | 7128990  | INSR    |
| chr19 | 7132143  | 7132353  | INSR    |
| chr19 | 7141662  | 7141852  | INSR    |
| chr19 | 7142801  | 7143126  | INSR    |
| chr19 | 7150482  | 7150568  | INSR    |
| chr19 | 7152711  | 7152963  | INSR    |
| chr19 | 7163017  | 7163235  | INSR    |
| chr19 | 7166139  | 7166440  | INSR    |
| chr19 | 7167953  | 7168130  | INSR    |
| chr19 | 7170522  | 7170787  | INSR    |
| chr19 | 7172275  | 7172470  | INSR    |
| chr19 | 7174568  | 7174767  | INSR    |
| chr19 | 7184301  | 7184673  | INSR    |
| chr19 | 7267330  | 7267932  | INSR    |
| chr19 | 7293777  | 7293927  | INSR    |
| chr19 | 8555047  | 8555135  | PRAM1   |
| chr19 | 8555196  | 8555281  | PRAM1   |
| chr19 | 8555334  | 8555418  | PRAM1   |
| chr19 | 8555452  | 8555665  | PRAM1   |
| chr19 | 8555745  | 8555904  | PRAM1   |
| chr19 | 8555958  | 8556066  | PRAM1   |
| chr19 | 8560913  | 8561014  | PRAM1   |
| chr19 | 8562622  | 8562749  | PRAM1   |
| chr19 | 8563081  | 8563198  | PRAM1   |
| chr19 | 8563234  | 8564689  | PRAM1   |
| chr19 | 8567423  | 8567500  | PRAM1   |
| chr19 | 10597302 | 10597519 | KEAP1   |
| chr19 | 10599842 | 10600069 | KEAP1   |
| chr19 | 10600298 | 10600554 | KEAP1   |
| chr19 | 10602227 | 10602963 | KEAP1   |
| chr19 | 10610045 | 10610734 | KEAP1   |
| chr19 | 11094802 | 11095074 | SMARCA4 |
| chr19 | 11095923 | 11096106 | SMARCA4 |
| chr19 | 11096839 | 11097294 | SMARCA4 |
| chr19 | 11097555 | 11097704 | SMARCA4 |

|       |          |          |         |
|-------|----------|----------|---------|
| chr19 | 11098316 | 11098625 | SMARCA4 |
| chr19 | 11099967 | 11100144 | SMARCA4 |
| chr19 | 11101800 | 11102024 | SMARCA4 |
| chr19 | 11105478 | 11105702 | SMARCA4 |
| chr19 | 11105767 | 11105914 | SMARCA4 |
| chr19 | 11105993 | 11106086 | SMARCA4 |
| chr19 | 11106154 | 11106244 | SMARCA4 |
| chr19 | 11106565 | 11106627 | SMARCA4 |
| chr19 | 11106863 | 11107081 | SMARCA4 |
| chr19 | 11107144 | 11107245 | SMARCA4 |
| chr19 | 11113679 | 11113860 | SMARCA4 |
| chr19 | 11113990 | 11114098 | SMARCA4 |
| chr19 | 11118552 | 11118724 | SMARCA4 |
| chr19 | 11121031 | 11121232 | SMARCA4 |
| chr19 | 11123599 | 11123813 | SMARCA4 |
| chr19 | 11129607 | 11129724 | SMARCA4 |
| chr19 | 11130241 | 11130402 | SMARCA4 |
| chr19 | 11132375 | 11132668 | SMARCA4 |
| chr19 | 11134168 | 11134332 | SMARCA4 |
| chr19 | 11134981 | 11135139 | SMARCA4 |
| chr19 | 11136072 | 11136209 | SMARCA4 |
| chr19 | 11136950 | 11137047 | SMARCA4 |
| chr19 | 11138434 | 11138651 | SMARCA4 |
| chr19 | 11141380 | 11141594 | SMARCA4 |
| chr19 | 11143940 | 11144218 | SMARCA4 |
| chr19 | 11144417 | 11144566 | SMARCA4 |
| chr19 | 11144773 | 11144901 | SMARCA4 |
| chr19 | 11145564 | 11145833 | SMARCA4 |
| chr19 | 11150108 | 11150254 | SMARCA4 |
| chr19 | 11151948 | 11152261 | SMARCA4 |
| chr19 | 11168905 | 11169064 | SMARCA4 |
| chr19 | 11169438 | 11169590 | SMARCA4 |
| chr19 | 11170403 | 11170586 | SMARCA4 |
| chr19 | 11170695 | 11170888 | SMARCA4 |
| chr19 | 11172434 | 11172517 | SMARCA4 |
| chr19 | 15271447 | 15272550 | NOTCH3  |
| chr19 | 15273250 | 15273398 | NOTCH3  |
| chr19 | 15276153 | 15276351 | NOTCH3  |
| chr19 | 15276572 | 15276927 | NOTCH3  |
| chr19 | 15278034 | 15278247 | NOTCH3  |
| chr19 | 15280871 | 15281006 | NOTCH3  |
| chr19 | 15281116 | 15281389 | NOTCH3  |
| chr19 | 15281456 | 15281661 | NOTCH3  |
| chr19 | 15284853 | 15285236 | NOTCH3  |
| chr19 | 15288310 | 15288926 | NOTCH3  |
| chr19 | 15289608 | 15289777 | NOTCH3  |
| chr19 | 15289810 | 15290118 | NOTCH3  |
| chr19 | 15290149 | 15290332 | NOTCH3  |
| chr19 | 15290857 | 15291092 | NOTCH3  |
| chr19 | 15291466 | 15291664 | NOTCH3  |
| chr19 | 15291746 | 15291998 | NOTCH3  |
| chr19 | 15292361 | 15292637 | NOTCH3  |
| chr19 | 15295080 | 15295286 | NOTCH3  |
| chr19 | 15295691 | 15295855 | NOTCH3  |
| chr19 | 15296042 | 15296244 | NOTCH3  |
| chr19 | 15296272 | 15296515 | NOTCH3  |
| chr19 | 15297663 | 15297824 | NOTCH3  |
| chr19 | 15297890 | 15298174 | NOTCH3  |
| chr19 | 15298666 | 15298830 | NOTCH3  |
| chr19 | 15299020 | 15299184 | NOTCH3  |
| chr19 | 15299774 | 15300010 | NOTCH3  |
| chr19 | 15300058 | 15300264 | NOTCH3  |
| chr19 | 15302209 | 15302493 | NOTCH3  |
| chr19 | 15302530 | 15302703 | NOTCH3  |
| chr19 | 15302745 | 15303134 | NOTCH3  |
| chr19 | 15303162 | 15303355 | NOTCH3  |
| chr19 | 15308285 | 15308414 | NOTCH3  |
| chr19 | 15311573 | 15311747 | NOTCH3  |
| chr19 | 15349162 | 15349281 | BRD4    |
| chr19 | 15349528 | 15349816 | BRD4    |
| chr19 | 15349844 | 15350100 | BRD4    |
| chr19 | 15350177 | 15350358 | BRD4    |
| chr19 | 15350444 | 15350657 | BRD4    |
| chr19 | 15350695 | 15350858 | BRD4    |
| chr19 | 15353685 | 15354323 | BRD4    |
| chr19 | 15355016 | 15355436 | BRD4    |
| chr19 | 15355495 | 15355598 | BRD4    |
| chr19 | 15360065 | 15360126 | BRD4    |
| chr19 | 15364342 | 15364619 | BRD4    |
| chr19 | 15364937 | 15365098 | BRD4    |
| chr19 | 15366082 | 15366428 | BRD4    |
| chr19 | 15366849 | 15367099 | BRD4    |
| chr19 | 15367749 | 15368009 | BRD4    |
| chr19 | 15374205 | 15374384 | BRD4    |
| chr19 | 15375189 | 15375602 | BRD4    |
| chr19 | 15376139 | 15376479 | BRD4    |
| chr19 | 15378201 | 15378387 | BRD4    |
| chr19 | 15379690 | 15379878 | BRD4    |
| chr19 | 15383600 | 15383935 | BRD4    |
| chr19 | 17937526 | 17937744 | JAK3    |
| chr19 | 17940813 | 17941052 | JAK3    |
| chr19 | 17941286 | 17941454 | JAK3    |
| chr19 | 17942011 | 17942234 | JAK3    |
| chr19 | 17942457 | 17942632 | JAK3    |
| chr19 | 17943302 | 17943542 | JAK3    |
| chr19 | 17943573 | 17943763 | JAK3    |

|       |          |          |        |
|-------|----------|----------|--------|
| chr19 | 17945354 | 17945555 | JAK3   |
| chr19 | 17945635 | 17945837 | JAK3   |
| chr19 | 17945866 | 17946049 | JAK3   |
| chr19 | 17946707 | 17946885 | JAK3   |
| chr19 | 17947838 | 17948047 | JAK3   |
| chr19 | 17948715 | 17948897 | JAK3   |
| chr19 | 17949046 | 17949224 | JAK3   |
| chr19 | 17950260 | 17950497 | JAK3   |
| chr19 | 17951013 | 17951175 | JAK3   |
| chr19 | 17952172 | 17952380 | JAK3   |
| chr19 | 17952423 | 17952596 | JAK3   |
| chr19 | 17953099 | 17953444 | JAK3   |
| chr19 | 17953810 | 17954006 | JAK3   |
| chr19 | 17954163 | 17954325 | JAK3   |
| chr19 | 17954560 | 17954734 | JAK3   |
| chr19 | 17955017 | 17955251 | JAK3   |
| chr19 | 30303437 | 30303510 | CCNE1  |
| chr19 | 30303570 | 30303708 | CCNE1  |
| chr19 | 30303850 | 30303969 | CCNE1  |
| chr19 | 30308018 | 30308214 | CCNE1  |
| chr19 | 30308287 | 30308491 | CCNE1  |
| chr19 | 30311583 | 30311780 | CCNE1  |
| chr19 | 30312603 | 30312749 | CCNE1  |
| chr19 | 30312877 | 30313062 | CCNE1  |
| chr19 | 30313121 | 30313283 | CCNE1  |
| chr19 | 30313327 | 30313535 | CCNE1  |
| chr19 | 30314536 | 30314709 | CCNE1  |
| chr19 | 33792218 | 33793345 | CEBPA  |
| chr19 | 39989589 | 39989708 | DLL3   |
| chr19 | 39989806 | 39990138 | DLL3   |
| chr19 | 39991229 | 39991337 | DLL3   |
| chr19 | 39993429 | 39993722 | DLL3   |
| chr19 | 39994685 | 39994953 | DLL3   |
| chr19 | 39995843 | 39996116 | DLL3   |
| chr19 | 39997653 | 39998283 | DLL3   |
| chr19 | 39998444 | 39998678 | DLL3   |
| chr19 | 39998866 | 39998922 | DLL3   |
| chr19 | 40739450 | 40739621 | AKT2   |
| chr19 | 40739753 | 40739883 | AKT2   |
| chr19 | 40740926 | 40741079 | AKT2   |
| chr19 | 40741144 | 40741282 | AKT2   |
| chr19 | 40741771 | 40742036 | AKT2   |
| chr19 | 40742138 | 40742317 | AKT2   |
| chr19 | 40743850 | 40744023 | AKT2   |
| chr19 | 40744786 | 40744905 | AKT2   |
| chr19 | 40745698 | 40746042 | AKT2   |
| chr19 | 40747819 | 40748001 | AKT2   |
| chr19 | 40748415 | 40748619 | AKT2   |
| chr19 | 40761039 | 40761201 | AKT2   |
| chr19 | 40762807 | 40762986 | AKT2   |
| chr19 | 40771099 | 40771199 | AKT2   |
| chr19 | 41349675 | 41349907 | CYP2A6 |
| chr19 | 41350510 | 41350702 | CYP2A6 |
| chr19 | 41351173 | 41351411 | CYP2A6 |
| chr19 | 41351835 | 41352027 | CYP2A6 |
| chr19 | 41352754 | 41352981 | CYP2A6 |
| chr19 | 41354098 | 41354309 | CYP2A6 |
| chr19 | 41354493 | 41354693 | CYP2A6 |
| chr19 | 41355697 | 41355910 | CYP2A6 |
| chr19 | 41356126 | 41356356 | CYP2A6 |
| chr19 | 41497185 | 41497406 | CYP2B6 |
| chr19 | 41509829 | 41510093 | CYP2B6 |
| chr19 | 41510176 | 41510376 | CYP2B6 |
| chr19 | 41512784 | 41512995 | CYP2B6 |
| chr19 | 41515098 | 41515325 | CYP2B6 |
| chr19 | 41515873 | 41516065 | CYP2B6 |
| chr19 | 41518177 | 41518415 | CYP2B6 |
| chr19 | 41518553 | 41518745 | CYP2B6 |
| chr19 | 41522525 | 41522757 | CYP2B6 |
| chr19 | 42381349 | 42381478 | CD79A  |
| chr19 | 42383034 | 42383384 | CD79A  |
| chr19 | 42383579 | 42383748 | CD79A  |
| chr19 | 42384711 | 42384830 | CD79A  |
| chr19 | 42384908 | 42385072 | CD79A  |
| chr19 | 42788831 | 42788948 | CIC    |
| chr19 | 42790897 | 42791097 | CIC    |
| chr19 | 42791132 | 42791417 | CIC    |
| chr19 | 42791446 | 42791626 | CIC    |
| chr19 | 42791671 | 42791904 | CIC    |
| chr19 | 42791936 | 42792152 | CIC    |
| chr19 | 42793014 | 42793267 | CIC    |
| chr19 | 42793307 | 42793583 | CIC    |
| chr19 | 42793974 | 42794128 | CIC    |
| chr19 | 42794359 | 42795643 | CIC    |
| chr19 | 42795684 | 42795922 | CIC    |
| chr19 | 42796212 | 42796384 | CIC    |
| chr19 | 42796426 | 42796643 | CIC    |
| chr19 | 42796692 | 42797036 | CIC    |
| chr19 | 42797082 | 42797458 | CIC    |
| chr19 | 42797718 | 42798013 | CIC    |
| chr19 | 42798061 | 42798266 | CIC    |
| chr19 | 42798299 | 42798481 | CIC    |
| chr19 | 42798730 | 42798912 | CIC    |
| chr19 | 42798950 | 42799368 | CIC    |
| chr19 | 45854861 | 45855004 | ERCC2  |
| chr19 | 45855441 | 45855635 | ERCC2  |

|       |          |          |         |
|-------|----------|----------|---------|
| chr19 | 45855738 | 45855932 | ERCC2   |
| chr19 | 45855978 | 45856099 | ERCC2   |
| chr19 | 45856315 | 45856438 | ERCC2   |
| chr19 | 45856474 | 45856617 | ERCC2   |
| chr19 | 45857962 | 45858134 | ERCC2   |
| chr19 | 45858897 | 45859011 | ERCC2   |
| chr19 | 45860502 | 45860654 | ERCC2   |
| chr19 | 45860706 | 45860826 | ERCC2   |
| chr19 | 45860862 | 45860982 | ERCC2   |
| chr19 | 45862092 | 45862195 | ERCC2   |
| chr19 | 45864756 | 45864925 | ERCC2   |
| chr19 | 45866975 | 45867194 | ERCC2   |
| chr19 | 45867218 | 45867402 | ERCC2   |
| chr19 | 45867467 | 45867614 | ERCC2   |
| chr19 | 45867656 | 45867830 | ERCC2   |
| chr19 | 45868070 | 45868237 | ERCC2   |
| chr19 | 45868274 | 45868441 | ERCC2   |
| chr19 | 45871862 | 45872026 | ERCC2   |
| chr19 | 45872162 | 45872275 | ERCC2   |
| chr19 | 45872302 | 45872430 | ERCC2   |
| chr19 | 45873365 | 45873515 | ERCC2   |
| chr19 | 45873768 | 45873823 | ERCC2   |
| chr19 | 50902080 | 50902335 | POLD1   |
| chr19 | 50902602 | 50902766 | POLD1   |
| chr19 | 50905009 | 50905206 | POLD1   |
| chr19 | 50905230 | 50905406 | POLD1   |
| chr19 | 50905436 | 50905655 | POLD1   |
| chr19 | 50905685 | 50905817 | POLD1   |
| chr19 | 50905843 | 50906023 | POLD1   |
| chr19 | 50906284 | 50906501 | POLD1   |
| chr19 | 50906724 | 50906879 | POLD1   |
| chr19 | 50909413 | 50909604 | POLD1   |
| chr19 | 50909638 | 50909799 | POLD1   |
| chr19 | 50910214 | 50910456 | POLD1   |
| chr19 | 50910558 | 50910697 | POLD1   |
| chr19 | 50912016 | 50912183 | POLD1   |
| chr19 | 50912353 | 50912517 | POLD1   |
| chr19 | 50912750 | 50912948 | POLD1   |
| chr19 | 50916657 | 50916803 | POLD1   |
| chr19 | 50916973 | 50917161 | POLD1   |
| chr19 | 50918046 | 50918272 | POLD1   |
| chr19 | 50918669 | 50918872 | POLD1   |
| chr19 | 50918955 | 50919108 | POLD1   |
| chr19 | 50919627 | 50919810 | POLD1   |
| chr19 | 50919841 | 50920005 | POLD1   |
| chr19 | 50920276 | 50920379 | POLD1   |
| chr19 | 50920403 | 50920551 | POLD1   |
| chr19 | 50921073 | 50921229 | POLD1   |
| chr19 | 52693324 | 52693452 | PPP2R1A |
| chr19 | 52705171 | 52705312 | PPP2R1A |
| chr19 | 52709190 | 52709341 | PPP2R1A |
| chr19 | 52714487 | 52714770 | PPP2R1A |
| chr19 | 52715913 | 52716111 | PPP2R1A |
| chr19 | 52716182 | 52716388 | PPP2R1A |
| chr19 | 52719006 | 52719171 | PPP2R1A |
| chr19 | 52719231 | 52719352 | PPP2R1A |
| chr19 | 52719756 | 52719941 | PPP2R1A |
| chr19 | 52722918 | 52723142 | PPP2R1A |
| chr19 | 52723416 | 52723527 | PPP2R1A |
| chr19 | 52724206 | 52724411 | PPP2R1A |
| chr19 | 52725326 | 52725519 | PPP2R1A |
| chr19 | 52728944 | 52729086 | PPP2R1A |
| chr19 | 52729192 | 52729259 | PPP2R1A |
| chr20 | 10620120 | 10620628 | JAG1    |
| chr20 | 10621405 | 10621606 | JAG1    |
| chr20 | 10621735 | 10621917 | JAG1    |
| chr20 | 10622082 | 10622366 | JAG1    |
| chr20 | 10622405 | 10622565 | JAG1    |
| chr20 | 10623110 | 10623274 | JAG1    |
| chr20 | 10624400 | 10624536 | JAG1    |
| chr20 | 10624979 | 10625057 | JAG1    |
| chr20 | 10625485 | 10625652 | JAG1    |
| chr20 | 10625765 | 10625929 | JAG1    |
| chr20 | 10625978 | 10626142 | JAG1    |
| chr20 | 10626593 | 10626757 | JAG1    |
| chr20 | 10627561 | 10627776 | JAG1    |
| chr20 | 10628582 | 10628783 | JAG1    |
| chr20 | 10629171 | 10629395 | JAG1    |
| chr20 | 10629683 | 10629780 | JAG1    |
| chr20 | 10630144 | 10630308 | JAG1    |
| chr20 | 10630869 | 10631033 | JAG1    |
| chr20 | 10632203 | 10632367 | JAG1    |
| chr20 | 10632753 | 10632923 | JAG1    |
| chr20 | 10633090 | 10633271 | JAG1    |
| chr20 | 10637020 | 10637131 | JAG1    |
| chr20 | 10639090 | 10639395 | JAG1    |
| chr20 | 10644585 | 10644687 | JAG1    |
| chr20 | 10653323 | 10653679 | JAG1    |
| chr20 | 10654072 | 10654203 | JAG1    |
| chr20 | 30253726 | 30253914 | BCL2L1  |
| chr20 | 30309432 | 30310046 | BCL2L1  |
| chr20 | 30946553 | 30946660 | ASXL1   |
| chr20 | 30947085 | 30947162 | ASXL1   |
| chr20 | 30947524 | 30947619 | ASXL1   |
| chr20 | 30954161 | 30954295 | ASXL1   |
| chr20 | 30955504 | 30955557 | ASXL1   |

|       |          |          |       |
|-------|----------|----------|-------|
| chr20 | 30956789 | 30956951 | ASXL1 |
| chr20 | 30959555 | 30959611 | ASXL1 |
| chr20 | 30959941 | 30959997 | ASXL1 |
| chr20 | 31015905 | 31016076 | ASXL1 |
| chr20 | 31016102 | 31016250 | ASXL1 |
| chr20 | 31017115 | 31017259 | ASXL1 |
| chr20 | 31017678 | 31017881 | ASXL1 |
| chr20 | 31019098 | 31019312 | ASXL1 |
| chr20 | 31019360 | 31019507 | ASXL1 |
| chr20 | 31020657 | 31020813 | ASXL1 |
| chr20 | 31021061 | 31021745 | ASXL1 |
| chr20 | 31022209 | 31025166 | ASXL1 |
| chr20 | 36012531 | 36012831 | SRC   |
| chr20 | 36014452 | 36014602 | SRC   |
| chr20 | 36014837 | 36014905 | SRC   |
| chr20 | 36022272 | 36022421 | SRC   |
| chr20 | 36022551 | 36022705 | SRC   |
| chr20 | 36024539 | 36024739 | SRC   |
| chr20 | 36026076 | 36026282 | SRC   |
| chr20 | 36028492 | 36028722 | SRC   |
| chr20 | 36029979 | 36030106 | SRC   |
| chr20 | 36030812 | 36031016 | SRC   |
| chr20 | 36031126 | 36031308 | SRC   |
| chr20 | 36031548 | 36031807 | SRC   |
| chr20 | 39657682 | 39657765 | TOP1  |
| chr20 | 39658045 | 39658120 | TOP1  |
| chr20 | 39690008 | 39690155 | TOP1  |
| chr20 | 39704785 | 39704959 | TOP1  |
| chr20 | 39706196 | 39706302 | TOP1  |
| chr20 | 39708699 | 39708845 | TOP1  |
| chr20 | 39709779 | 39709905 | TOP1  |
| chr20 | 39713076 | 39713233 | TOP1  |
| chr20 | 39721086 | 39721252 | TOP1  |
| chr20 | 39725834 | 39726006 | TOP1  |
| chr20 | 39726829 | 39727002 | TOP1  |
| chr20 | 39728670 | 39728908 | TOP1  |
| chr20 | 39729823 | 39730018 | TOP1  |
| chr20 | 39741396 | 39741590 | TOP1  |
| chr20 | 39742584 | 39742820 | TOP1  |
| chr20 | 39743985 | 39744104 | TOP1  |
| chr20 | 39744892 | 39745057 | TOP1  |
| chr20 | 39746783 | 39746961 | TOP1  |
| chr20 | 39750310 | 39750455 | TOP1  |
| chr20 | 39750620 | 39750820 | TOP1  |
| chr20 | 39751809 | 39751962 | TOP1  |
| chr20 | 39766256 | 39766523 | PLCG1 |
| chr20 | 39788220 | 39788423 | PLCG1 |
| chr20 | 39788484 | 39788628 | PLCG1 |
| chr20 | 39788720 | 39788818 | PLCG1 |
| chr20 | 39791066 | 39791201 | PLCG1 |
| chr20 | 39791256 | 39791390 | PLCG1 |
| chr20 | 39791572 | 39791657 | PLCG1 |
| chr20 | 39791817 | 39791940 | PLCG1 |
| chr20 | 39791992 | 39792144 | PLCG1 |
| chr20 | 39792329 | 39792498 | PLCG1 |
| chr20 | 39792535 | 39792671 | PLCG1 |
| chr20 | 39792695 | 39792866 | PLCG1 |
| chr20 | 39793547 | 39793766 | PLCG1 |
| chr20 | 39793859 | 39794032 | PLCG1 |
| chr20 | 39794064 | 39794216 | PLCG1 |
| chr20 | 39794253 | 39794491 | PLCG1 |
| chr20 | 39794808 | 39795059 | PLCG1 |
| chr20 | 39795090 | 39795260 | PLCG1 |
| chr20 | 39795293 | 39795524 | PLCG1 |
| chr20 | 39796466 | 39796594 | PLCG1 |
| chr20 | 39797381 | 39797535 | PLCG1 |
| chr20 | 39797693 | 39797840 | PLCG1 |
| chr20 | 39798071 | 39798191 | PLCG1 |
| chr20 | 39798726 | 39798934 | PLCG1 |
| chr20 | 39800807 | 39800954 | PLCG1 |
| chr20 | 39801035 | 39801310 | PLCG1 |
| chr20 | 39801343 | 39801542 | PLCG1 |
| chr20 | 39802034 | 39802199 | PLCG1 |
| chr20 | 39802266 | 39802478 | PLCG1 |
| chr20 | 39802537 | 39802676 | PLCG1 |
| chr20 | 39802738 | 39802976 | PLCG1 |
| chr20 | 39803081 | 39803174 | PLCG1 |
| chr20 | 48124431 | 48124626 | PTGIS |
| chr20 | 48127539 | 48127741 | PTGIS |
| chr20 | 48129591 | 48129823 | PTGIS |
| chr20 | 48130738 | 48130957 | PTGIS |
| chr20 | 48140569 | 48140801 | PTGIS |
| chr20 | 48156081 | 48156283 | PTGIS |
| chr20 | 48160816 | 48161010 | PTGIS |
| chr20 | 48164352 | 48164581 | PTGIS |
| chr20 | 48166577 | 48166751 | PTGIS |
| chr20 | 48184554 | 48184678 | PTGIS |
| chr20 | 50400778 | 50401248 | SALL4 |
| chr20 | 50405374 | 50405705 | SALL4 |
| chr20 | 50406535 | 50408916 | SALL4 |
| chr20 | 50418792 | 50418972 | SALL4 |
| chr20 | 54945188 | 54945421 | AURKA |
| chr20 | 54945500 | 54945740 | AURKA |
| chr20 | 54948438 | 54948637 | AURKA |
| chr20 | 54956463 | 54956652 | AURKA |
| chr20 | 54958015 | 54958257 | AURKA |

|       |          |          |                  |
|-------|----------|----------|------------------|
| chr20 | 54959300 | 54959405 | AURKA            |
| chr20 | 54961287 | 54961614 | AURKA            |
| chr20 | 54963186 | 54963278 | AURKA            |
| chr20 | 57415136 | 57415924 | GNAS, GNAS-AS1   |
| chr20 | 57428295 | 57430413 | GNAS             |
| chr20 | 57430583 | 57430728 | GNAS             |
| chr20 | 57466756 | 57466945 | GNAS             |
| chr20 | 57470641 | 57470764 | GNAS             |
| chr20 | 57473970 | 57474065 | GNAS             |
| chr20 | 57474978 | 57475035 | GNAS             |
| chr20 | 57478557 | 57478665 | GNAS             |
| chr20 | 57478701 | 57478871 | GNAS             |
| chr20 | 57480412 | 57480560 | GNAS             |
| chr20 | 57484191 | 57484296 | GNAS             |
| chr20 | 57484379 | 57484503 | GNAS             |
| chr20 | 57484550 | 57484659 | GNAS             |
| chr20 | 57484713 | 57484884 | GNAS             |
| chr20 | 57484980 | 57485161 | GNAS             |
| chr20 | 57485363 | 57485481 | GNAS             |
| chr20 | 57485712 | 57485909 | GNAS             |
| chr20 | 62331769 | 62331907 | ARFRP1           |
| chr20 | 62331924 | 62332079 | ARFRP1           |
| chr20 | 62333156 | 62333277 | ARFRP1           |
| chr20 | 62333462 | 62333594 | ARFRP1           |
| chr20 | 62336964 | 62337164 | ARFRP1           |
| chr20 | 62337683 | 62337816 | ARFRP1           |
| chr20 | 62337977 | 62338115 | ARFRP1           |
| chr20 | 62338325 | 62338468 | ARFRP1           |
| chr21 | 36164250 | 36164398 | RUNX1            |
| chr21 | 36164406 | 36164932 | RUNX1            |
| chr21 | 36171572 | 36171784 | RUNX1            |
| chr21 | 36193939 | 36194018 | RUNX1            |
| chr21 | 36206681 | 36206923 | RUNX1            |
| chr21 | 36228684 | 36228769 | RUNX1            |
| chr21 | 36231745 | 36231900 | RUNX1            |
| chr21 | 36252828 | 36253035 | RUNX1            |
| chr21 | 36259114 | 36259434 | RUNX1            |
| chr21 | 36261948 | 36262059 | RUNX1            |
| chr21 | 36265196 | 36265285 | RUNX1            |
| chr21 | 36421113 | 36421221 | RUNX1            |
| chr21 | 39739531 | 39739595 |                  |
| chr21 | 39755299 | 39755870 | ERG              |
| chr21 | 39762891 | 39762989 | ERG              |
| chr21 | 39763555 | 39763662 | ERG              |
| chr21 | 39764213 | 39764391 | ERG              |
| chr21 | 39772470 | 39772592 | ERG              |
| chr21 | 39774453 | 39774584 | ERG              |
| chr21 | 39775402 | 39775656 | ERG              |
| chr21 | 39795306 | 39795508 | ERG              |
| chr21 | 39817301 | 39817569 | ERG              |
| chr21 | 39870261 | 39870329 | ERG              |
| chr21 | 39947560 | 39947649 | ERG              |
| chr21 | 44513186 | 44513384 | U2AF1            |
| chr21 | 44514555 | 44514698 | U2AF1            |
| chr21 | 44514739 | 44514923 | U2AF1            |
| chr21 | 44515522 | 44515671 | U2AF1            |
| chr21 | 44515778 | 44515878 | U2AF1            |
| chr21 | 44520537 | 44520654 | U2AF1            |
| chr21 | 44521450 | 44521567 | U2AF1            |
| chr21 | 44524399 | 44524537 | U2AF1            |
| chr21 | 44527535 | 44527629 | U2AF1            |
| chr21 | 46916223 | 46916318 | COL18A1          |
| chr21 | 46918234 | 46918551 | COL18A1, SLC19A1 |
| chr21 | 46934864 | 46935091 | SLC19A1          |
| chr21 | 46935546 | 46936079 | SLC19A1          |
| chr21 | 46945705 | 46945897 | SLC19A1          |
| chr21 | 46950658 | 46950910 | SLC19A1          |
| chr21 | 46951277 | 46952087 | SLC19A1          |
| chr21 | 46954426 | 46954545 | SLC19A1          |
| chr21 | 46957659 | 46957898 | SLC19A1          |
| chr22 | 19950024 | 19950363 | COMT             |
| chr22 | 19951063 | 19951307 | COMT, MIR4761    |
| chr22 | 19951665 | 19951940 | COMT             |
| chr22 | 19956033 | 19956284 | COMT             |
| chr22 | 21272197 | 21272558 | CRKL             |
| chr22 | 21288041 | 21288557 | CRKL             |
| chr22 | 21303973 | 21304158 | CRKL             |
| chr22 | 24129331 | 24129474 | SMARCB1          |
| chr22 | 24133917 | 24134106 | SMARCB1          |
| chr22 | 24135720 | 24135900 | SMARCB1          |
| chr22 | 24143105 | 24143347 | SMARCB1          |
| chr22 | 24145456 | 24145634 | SMARCB1          |
| chr22 | 24158931 | 24159148 | SMARCB1          |
| chr22 | 24167386 | 24167627 | SMARCB1          |
| chr22 | 24175733 | 24175915 | SMARCB1          |
| chr22 | 24176302 | 24176392 | SMARCB1          |
| chr22 | 24376397 | 24376642 | GSTT1            |
| chr22 | 24376796 | 24377023 | GSTT1            |
| chr22 | 24379335 | 24379536 | GSTT1            |
| chr22 | 24381674 | 24381812 | GSTT1            |
| chr22 | 24383860 | 24383912 | GSTT1            |
| chr22 | 24384094 | 24384256 | GSTT1            |
| chr22 | 29083859 | 29083999 | CHEK2            |
| chr22 | 29085097 | 29085279 | CHEK2            |
| chr22 | 29089994 | 29090130 | CHEK2            |
| chr22 | 29091089 | 29091255 | CHEK2            |

|       |          |          |                    |
|-------|----------|----------|--------------------|
| chr22 | 29091672 | 29091886 | CHEK2              |
| chr22 | 29092863 | 29093000 | CHEK2              |
| chr22 | 29095800 | 29095950 | CHEK2              |
| chr22 | 29099467 | 29099579 | CHEK2              |
| chr22 | 29105968 | 29106072 | CHEK2              |
| chr22 | 29107871 | 29108030 | CHEK2              |
| chr22 | 29115357 | 29115498 | CHEK2              |
| chr22 | 29120939 | 29121137 | CHEK2              |
| chr22 | 29121205 | 29121380 | CHEK2              |
| chr22 | 29126382 | 29126561 | CHEK2              |
| chr22 | 29130365 | 29130734 | CHEK2              |
| chr22 | 29999962 | 30000126 | NF2                |
| chr22 | 30032714 | 30032890 | NF2                |
| chr22 | 30035053 | 30035226 | NF2                |
| chr22 | 30038165 | 30038299 | NF2                |
| chr22 | 30050620 | 30050739 | NF2                |
| chr22 | 30051557 | 30051690 | NF2                |
| chr22 | 30054152 | 30054278 | NF2                |
| chr22 | 30057168 | 30057353 | NF2                |
| chr22 | 30060953 | 30061078 | NF2                |
| chr22 | 30064296 | 30064460 | NF2                |
| chr22 | 30067789 | 30067962 | NF2                |
| chr22 | 30069232 | 30069500 | NF2                |
| chr22 | 30070799 | 30070955 | NF2                |
| chr22 | 30074159 | 30074337 | NF2                |
| chr22 | 30077402 | 30077615 | NF2                |
| chr22 | 30078942 | 30079078 | NF2                |
| chr22 | 30090715 | 30090823 | NF2                |
| chr22 | 38369476 | 38370230 | POLR2F, SOX10      |
| chr22 | 38373848 | 38374167 | POLR2F, SOX10      |
| chr22 | 38379338 | 38379816 | POLR2F, SOX10      |
| chr22 | 41488983 | 41489127 | EP300              |
| chr22 | 41513165 | 41513850 | EP300              |
| chr22 | 41521842 | 41522069 | EP300              |
| chr22 | 41523465 | 41523777 | EP300              |
| chr22 | 41525868 | 41526032 | EP300              |
| chr22 | 41527366 | 41527662 | EP300              |
| chr22 | 41531791 | 41531935 | EP300              |
| chr22 | 41533631 | 41533819 | EP300              |
| chr22 | 41536118 | 41536286 | EP300              |
| chr22 | 41537026 | 41537251 | EP300              |
| chr22 | 41542717 | 41542845 | EP300              |
| chr22 | 41543815 | 41543975 | EP300              |
| chr22 | 41545016 | 41545204 | EP300              |
| chr22 | 41545739 | 41546227 | EP300              |
| chr22 | 41547811 | 41548041 | EP300              |
| chr22 | 41548184 | 41548379 | EP300              |
| chr22 | 41550973 | 41551142 | EP300              |
| chr22 | 41553147 | 41553437 | EP300              |
| chr22 | 41554390 | 41554529 | EP300              |
| chr22 | 41556620 | 41556751 | EP300              |
| chr22 | 41558701 | 41558808 | EP300              |
| chr22 | 41560031 | 41560159 | EP300              |
| chr22 | 41562577 | 41562695 | EP300              |
| chr22 | 41564427 | 41564628 | EP300              |
| chr22 | 41564699 | 41564896 | EP300              |
| chr22 | 41565481 | 41565645 | EP300              |
| chr22 | 41566384 | 41566600 | EP300              |
| chr22 | 41568477 | 41568692 | EP300              |
| chr22 | 41569601 | 41569813 | EP300              |
| chr22 | 41572225 | 41572557 | EP300              |
| chr22 | 41572751 | 41574985 | EP300              |
| chr22 | 42522550 | 42522779 | CYP2D6, NDUFA6-AS1 |
| chr22 | 42522827 | 42523019 | CYP2D6, NDUFA6-AS1 |
| chr22 | 42523423 | 42523661 | CYP2D6, NDUFA6-AS1 |
| chr22 | 42523818 | 42524010 | CYP2D6, NDUFA6-AS1 |
| chr22 | 42524150 | 42524377 | CYP2D6, NDUFA6-AS1 |
| chr22 | 42524760 | 42524971 | CYP2D6, NDUFA6-AS1 |
| chr22 | 42525009 | 42525212 | CYP2D6, NDUFA6-AS1 |
| chr22 | 42525357 | 42525416 | CYP2D6, NDUFA6-AS1 |
| chr22 | 42525714 | 42525963 | CYP2D6, NDUFA6-AS1 |
| chr22 | 42526588 | 42526818 | CYP2D6, NDUFA6-AS1 |
| chr22 | 42540383 | 42540490 | CYP2D7             |
| chrX  | 1314861  | 1315039  | CRLF2              |
| chrX  | 1317393  | 1317606  | CRLF2              |
| chrX  | 1317764  | 1318033  | CRLF2              |
| chrX  | 1321246  | 1321430  | CRLF2              |
| chrX  | 1325300  | 1325517  | CRLF2              |
| chrX  | 1327673  | 1327826  | CRLF2              |
| chrX  | 1331423  | 1331552  | CRLF2              |
| chrX  | 39909143 | 39909269 | BCOR               |
| chrX  | 39911336 | 39911678 | BCOR               |
| chrX  | 39913113 | 39913320 | BCOR               |
| chrX  | 39913483 | 39913611 | BCOR               |
| chrX  | 39914595 | 39914791 | BCOR               |
| chrX  | 39916382 | 39916599 | BCOR               |
| chrX  | 39921366 | 39921671 | BCOR               |
| chrX  | 39921973 | 39922349 | BCOR               |
| chrX  | 39922835 | 39923230 | BCOR               |
| chrX  | 39923563 | 39923877 | BCOR               |
| chrX  | 39930200 | 39930437 | BCOR               |
| chrX  | 39930864 | 39930968 | BCOR               |
| chrX  | 39931558 | 39934458 | BCOR               |
| chrX  | 39935681 | 39935810 | BCOR               |
| chrX  | 39936169 | 39936240 | BCOR               |
| chrX  | 39937071 | 39937207 | BCOR               |

|      |          |          |                |
|------|----------|----------|----------------|
| chrX | 40982856 | 40983002 | USP9X          |
| chrX | 40988227 | 40988423 | USP9X          |
| chrX | 40990684 | 40990814 | USP9X          |
| chrX | 40993952 | 40994115 | USP9X          |
| chrX | 40996031 | 40996300 | USP9X          |
| chrX | 40999883 | 41000049 | USP9X          |
| chrX | 41000193 | 41000495 | USP9X          |
| chrX | 41000520 | 41000709 | USP9X          |
| chrX | 41002518 | 41002721 | USP9X          |
| chrX | 41003749 | 41003904 | USP9X          |
| chrX | 41007596 | 41007853 | USP9X          |
| chrX | 41010148 | 41010335 | USP9X          |
| chrX | 41012175 | 41012359 | USP9X          |
| chrX | 41022017 | 41022155 | USP9X          |
| chrX | 41025099 | 41025492 | USP9X          |
| chrX | 41026709 | 41026855 | USP9X          |
| chrX | 41027234 | 41027496 | USP9X          |
| chrX | 41029222 | 41029513 | USP9X          |
| chrX | 41029697 | 41029897 | USP9X          |
| chrX | 41031065 | 41031236 | USP9X          |
| chrX | 41043225 | 41043406 | USP9X          |
| chrX | 41043624 | 41043953 | USP9X          |
| chrX | 41045744 | 41045920 | USP9X          |
| chrX | 41047219 | 41047395 | USP9X          |
| chrX | 41048536 | 41048753 | USP9X          |
| chrX | 41055478 | 41055637 | USP9X          |
| chrX | 41055819 | 41056016 | USP9X          |
| chrX | 41056591 | 41056788 | USP9X          |
| chrX | 41057755 | 41058028 | USP9X          |
| chrX | 41060287 | 41060558 | USP9X          |
| chrX | 41064530 | 41064771 | USP9X          |
| chrX | 41069736 | 41069960 | USP9X          |
| chrX | 41073795 | 41073987 | USP9X          |
| chrX | 41075126 | 41075930 | USP9X          |
| chrX | 41076447 | 41076621 | USP9X          |
| chrX | 41077599 | 41077875 | USP9X          |
| chrX | 41078329 | 41078509 | USP9X          |
| chrX | 41082444 | 41082680 | USP9X          |
| chrX | 41083969 | 41084240 | USP9X          |
| chrX | 41084276 | 41084415 | USP9X          |
| chrX | 41088480 | 41088687 | USP9X          |
| chrX | 41088794 | 41089105 | USP9X          |
| chrX | 41089728 | 41089874 | USP9X          |
| chrX | 41091614 | 41091802 | USP9X          |
| chrX | 44732772 | 44732983 | KDM6A          |
| chrX | 44733144 | 44733258 | KDM6A          |
| chrX | 44820503 | 44820662 | KDM6A          |
| chrX | 44833885 | 44833985 | KDM6A          |
| chrX | 44870180 | 44870289 | KDM6A          |
| chrX | 44879829 | 44880000 | KDM6A          |
| chrX | 44894150 | 44894255 | KDM6A          |
| chrX | 44896874 | 44896959 | KDM6A          |
| chrX | 44910928 | 44911072 | KDM6A          |
| chrX | 44913048 | 44913225 | KDM6A          |
| chrX | 44918225 | 44918374 | KDM6A          |
| chrX | 44918466 | 44918736 | KDM6A          |
| chrX | 44919241 | 44919426 | KDM6A          |
| chrX | 44919828 | 44920034 | KDM6A          |
| chrX | 44920543 | 44920689 | KDM6A          |
| chrX | 44921866 | 44922018 | KDM6A          |
| chrX | 44922641 | 44923087 | KDM6A          |
| chrX | 44928798 | 44929627 | KDM6A          |
| chrX | 44935916 | 44936096 | KDM6A          |
| chrX | 44937619 | 44937775 | KDM6A          |
| chrX | 44938365 | 44938621 | KDM6A          |
| chrX | 44941795 | 44941910 | KDM6A          |
| chrX | 44941934 | 44942059 | KDM6A          |
| chrX | 44942679 | 44942878 | KDM6A          |
| chrX | 44945084 | 44945249 | KDM6A          |
| chrX | 44948962 | 44949200 | KDM6A          |
| chrX | 44949942 | 44950134 | KDM6A          |
| chrX | 44966629 | 44966806 | KDM6A          |
| chrX | 44969298 | 44969519 | KDM6A          |
| chrX | 44970601 | 44970681 | KDM6A          |
| chrX | 47004820 | 47004940 | NDUFB11, RBM10 |
| chrX | 47006730 | 47006922 | RBM10          |
| chrX | 47028688 | 47028922 | RBM10          |
| chrX | 47030401 | 47030682 | RBM10          |
| chrX | 47032501 | 47032621 | RBM10          |
| chrX | 47034392 | 47034516 | RBM10          |
| chrX | 47035873 | 47036010 | RBM10          |
| chrX | 47038476 | 47038587 | RBM10          |
| chrX | 47038692 | 47038919 | RBM10          |
| chrX | 47039253 | 47039464 | RBM10          |
| chrX | 47039585 | 47039733 | RBM10          |
| chrX | 47039792 | 47039930 | RBM10          |
| chrX | 47040588 | 47040825 | RBM10          |
| chrX | 47040880 | 47041070 | RBM10          |
| chrX | 47041122 | 47041290 | RBM10          |
| chrX | 47041324 | 47041466 | RBM10          |
| chrX | 47041535 | 47041750 | RBM10          |
| chrX | 47044428 | 47044628 | RBM10          |
| chrX | 47044675 | 47044791 | RBM10          |
| chrX | 47044815 | 47045054 | RBM10          |
| chrX | 47045089 | 47045214 | RBM10          |
| chrX | 47045438 | 47045595 | RBM10          |



|      |          |          |                  |
|------|----------|----------|------------------|
| chrX | 47045631 | 47045811 | RBM10            |
| chrX | 47045847 | 47046023 | RBM10            |
| chrX | 47422341 | 47422487 | ARAF             |
| chrX | 47422599 | 47422753 | ARAF             |
| chrX | 47424170 | 47424323 | ARAF             |
| chrX | 47424358 | 47424563 | ARAF             |
| chrX | 47424616 | 47424778 | ARAF             |
| chrX | 47426012 | 47426204 | ARAF             |
| chrX | 47426257 | 47426335 | ARAF             |
| chrX | 47426359 | 47426555 | ARAF             |
| chrX | 47426603 | 47426856 | ARAF             |
| chrX | 47428091 | 47428318 | ARAF             |
| chrX | 47428360 | 47428457 | ARAF             |
| chrX | 47428912 | 47429081 | ARAF             |
| chrX | 47429266 | 47429448 | ARAF             |
| chrX | 47430251 | 47430436 | ARAF             |
| chrX | 47430696 | 47430881 | ARAF             |
| chrX | 48649491 | 48649761 | GATA1            |
| chrX | 48650225 | 48650653 | GATA1            |
| chrX | 48650704 | 48650900 | GATA1            |
| chrX | 48651553 | 48651729 | GATA1            |
| chrX | 48652174 | 48652700 | GATA1            |
| chrX | 53221900 | 53222044 | KDM5C            |
| chrX | 53222123 | 53222539 | KDM5C            |
| chrX | 53222593 | 53222843 | KDM5C            |
| chrX | 53222929 | 53223058 | KDM5C            |
| chrX | 53223295 | 53223945 | KDM5C            |
| chrX | 53224087 | 53224275 | KDM5C            |
| chrX | 53224387 | 53224617 | KDM5C            |
| chrX | 53225072 | 53225261 | KDM5C            |
| chrX | 53225842 | 53226251 | KDM5C            |
| chrX | 53226927 | 53227083 | KDM5C            |
| chrX | 53227646 | 53227844 | KDM5C            |
| chrX | 53227920 | 53228095 | KDM5C            |
| chrX | 53228133 | 53228365 | KDM5C            |
| chrX | 53230706 | 53230951 | KDM5C            |
| chrX | 53231010 | 53231180 | KDM5C            |
| chrX | 53239570 | 53239783 | KDM5C            |
| chrX | 53239832 | 53240064 | KDM5C            |
| chrX | 53240653 | 53240862 | KDM5C            |
| chrX | 53240943 | 53241113 | KDM5C            |
| chrX | 53243845 | 53244054 | KDM5C, KDM5C-IT1 |
| chrX | 53244951 | 53245183 | KDM5C            |
| chrX | 53245230 | 53245404 | KDM5C            |
| chrX | 53246299 | 53246484 | KDM5C            |
| chrX | 53246952 | 53247173 | KDM5C            |
| chrX | 53247432 | 53247605 | KDM5C            |
| chrX | 53249995 | 53250123 | KDM5C            |
| chrX | 53253896 | 53254096 | KDM5C            |
| chrX | 63409733 | 63413191 | AMER1            |
| chrX | 66764963 | 66766633 | AR               |
| chrX | 66788819 | 66788889 | AR               |
| chrX | 66863072 | 66863274 | AR               |
| chrX | 66905826 | 66905993 | AR               |
| chrX | 66914489 | 66914589 | AR               |
| chrX | 66931218 | 66931556 | AR               |
| chrX | 66937294 | 66937489 | AR               |
| chrX | 66941649 | 66941830 | AR               |
| chrX | 66942619 | 66942851 | AR               |
| chrX | 66943502 | 66943708 | AR               |
| chrX | 70338579 | 70338728 | MED12            |
| chrX | 70339197 | 70339352 | MED12            |
| chrX | 70339510 | 70339752 | MED12            |
| chrX | 70339838 | 70340045 | MED12            |
| chrX | 70340795 | 70341027 | MED12            |
| chrX | 70341151 | 70341312 | MED12            |
| chrX | 70341386 | 70341691 | MED12            |
| chrX | 70342024 | 70342221 | MED12            |
| chrX | 70342332 | 70342482 | MED12            |
| chrX | 70342562 | 70342749 | MED12            |
| chrX | 70342919 | 70343101 | MED12            |
| chrX | 70343418 | 70343595 | MED12            |
| chrX | 70343983 | 70344263 | MED12            |
| chrX | 70344588 | 70344719 | MED12            |
| chrX | 70344800 | 70345021 | MED12            |
| chrX | 70345175 | 70345370 | MED12            |
| chrX | 70345487 | 70345588 | MED12            |
| chrX | 70345860 | 70346029 | MED12            |
| chrX | 70346165 | 70346359 | MED12            |
| chrX | 70346793 | 70347007 | MED12            |
| chrX | 70347160 | 70347342 | MED12            |
| chrX | 70347717 | 70347995 | MED12            |
| chrX | 70348120 | 70348315 | MED12            |
| chrX | 70348422 | 70348593 | MED12            |
| chrX | 70348938 | 70349090 | MED12            |
| chrX | 70349140 | 70349304 | MED12            |
| chrX | 70349504 | 70349730 | MED12            |
| chrX | 70349859 | 70350089 | MED12            |
| chrX | 70351374 | 70351496 | MED12            |
| chrX | 70351897 | 70352081 | MED12            |
| chrX | 70352201 | 70352413 | MED12            |
| chrX | 70352669 | 70352831 | MED12            |
| chrX | 70352947 | 70353087 | MED12            |
| chrX | 70354181 | 70354341 | MED12            |
| chrX | 70354537 | 70354723 | MED12            |
| chrX | 70354916 | 70355128 | MED12            |

|      |           |           |       |
|------|-----------|-----------|-------|
| chrX | 70356105  | 70356530  | MED12 |
| chrX | 70356703  | 70356904  | MED12 |
| chrX | 70357011  | 70357267  | MED12 |
| chrX | 70357382  | 70357510  | MED12 |
| chrX | 70357550  | 70357818  | MED12 |
| chrX | 70360459  | 70360732  | MED12 |
| chrX | 70361054  | 70361245  | MED12 |
| chrX | 70361707  | 70361839  | MED12 |
| chrX | 70361999  | 70362093  | MED12 |
| chrX | 76763803  | 76764132  | ATRX  |
| chrX | 76776240  | 76776419  | ATRX  |
| chrX | 76776855  | 76777001  | ATRX  |
| chrX | 76777715  | 76777891  | ATRX  |
| chrX | 76778704  | 76778904  | ATRX  |
| chrX | 76812896  | 76813141  | ATRX  |
| chrX | 76814114  | 76814342  | ATRX  |
| chrX | 76829689  | 76829848  | ATRX  |
| chrX | 76845278  | 76845435  | ATRX  |
| chrX | 76849140  | 76849344  | ATRX  |
| chrX | 76854854  | 76855074  | ATRX  |
| chrX | 76855175  | 76855314  | ATRX  |
| chrX | 76855877  | 76856058  | ATRX  |
| chrX | 76872055  | 76872223  | ATRX  |
| chrX | 76874248  | 76874474  | ATRX  |
| chrX | 76875837  | 76876025  | ATRX  |
| chrX | 76888669  | 76888897  | ATRX  |
| chrX | 76889028  | 76889225  | ATRX  |
| chrX | 76890059  | 76890219  | ATRX  |
| chrX | 76891380  | 76891572  | ATRX  |
| chrX | 76907578  | 76907868  | ATRX  |
| chrX | 76909562  | 76909715  | ATRX  |
| chrX | 76912024  | 76912168  | ATRX  |
| chrX | 76918845  | 76919072  | ATRX  |
| chrX | 76920108  | 76920292  | ATRX  |
| chrX | 76931695  | 76931818  | ATRX  |
| chrX | 76936986  | 76940110  | ATRX  |
| chrX | 76940405  | 76940523  | ATRX  |
| chrX | 76944285  | 76944445  | ATRX  |
| chrX | 76949273  | 76949451  | ATRX  |
| chrX | 76952039  | 76952217  | ATRX  |
| chrX | 76953045  | 76953148  | ATRX  |
| chrX | 76954036  | 76954144  | ATRX  |
| chrX | 76954336  | 76954400  | ATRX  |
| chrX | 76972582  | 76972745  | ATRX  |
| chrX | 77041442  | 77041512  | ATRX  |
| chrX | 79277743  | 79277968  | TBX22 |
| chrX | 79278533  | 79278764  | TBX22 |
| chrX | 79279536  | 79279688  | TBX22 |
| chrX | 79281076  | 79281301  | TBX22 |
| chrX | 79282177  | 79282392  | TBX22 |
| chrX | 79282729  | 79282844  | TBX22 |
| chrX | 79283464  | 79283600  | TBX22 |
| chrX | 79285971  | 79286635  | TBX22 |
| chrX | 100604847 | 100604969 | BTK   |
| chrX | 100608156 | 100608364 | BTK   |
| chrX | 100608832 | 100609001 | BTK   |
| chrX | 100609592 | 100609707 | BTK   |
| chrX | 100611014 | 100611281 | BTK   |
| chrX | 100611746 | 100611968 | BTK   |
| chrX | 100612471 | 100612596 | BTK   |
| chrX | 100613121 | 100613173 | BTK   |
| chrX | 100613268 | 100613450 | BTK   |
| chrX | 100613579 | 100613709 | BTK   |
| chrX | 100614255 | 100614360 | BTK   |
| chrX | 100615050 | 100615163 | BTK   |
| chrX | 100615530 | 100615768 | BTK   |
| chrX | 100617135 | 100617253 | BTK   |
| chrX | 100617523 | 100617702 | BTK   |
| chrX | 100624960 | 100625092 | BTK   |
| chrX | 100626595 | 100626714 | BTK   |
| chrX | 100629498 | 100629647 | BTK   |
| chrX | 100630106 | 100630297 | BTK   |
| chrX | 110366306 | 110366531 | PAK3  |
| chrX | 110385298 | 110385449 | PAK3  |
| chrX | 110388062 | 110388175 | PAK3  |
| chrX | 110389723 | 110389818 | PAK3  |
| chrX | 110390939 | 110391143 | PAK3  |
| chrX | 110395612 | 110395700 | PAK3  |
| chrX | 110406117 | 110406299 | PAK3  |
| chrX | 110406764 | 110406980 | PAK3  |
| chrX | 110416220 | 110416334 | PAK3  |
| chrX | 110435329 | 110435428 | PAK3  |
| chrX | 110435708 | 110435871 | PAK3  |
| chrX | 110437503 | 110437671 | PAK3  |
| chrX | 110439044 | 110439194 | PAK3  |
| chrX | 110439646 | 110439893 | PAK3  |
| chrX | 110459623 | 110459811 | PAK3  |
| chrX | 110463560 | 110463700 | PAK3  |
| chrX | 123156452 | 123156546 | STAG2 |
| chrX | 123159664 | 123159793 | STAG2 |
| chrX | 123164785 | 123165000 | STAG2 |
| chrX | 123171351 | 123171498 | STAG2 |
| chrX | 123176393 | 123176520 | STAG2 |
| chrX | 123178988 | 123179243 | STAG2 |
| chrX | 123181178 | 123181380 | STAG2 |
| chrX | 123182829 | 123182953 | STAG2 |

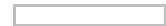

|      |           |           |             |
|------|-----------|-----------|-------------|
| chrX | 123184010 | 123184184 | STAG2       |
| chrX | 123184945 | 123185094 | STAG2       |
| chrX | 123185139 | 123185269 | STAG2       |
| chrX | 123189952 | 123190110 | STAG2       |
| chrX | 123191690 | 123191852 | STAG2       |
| chrX | 123195048 | 123195216 | STAG2       |
| chrX | 123195595 | 123195749 | STAG2       |
| chrX | 123196726 | 123196869 | STAG2       |
| chrX | 123196940 | 123197080 | STAG2       |
| chrX | 123197672 | 123197926 | STAG2       |
| chrX | 123199700 | 123199821 | STAG2       |
| chrX | 123199999 | 123200137 | STAG2       |
| chrX | 123200180 | 123200311 | STAG2       |
| chrX | 123202388 | 123202531 | STAG2       |
| chrX | 123204973 | 123205198 | STAG2       |
| chrX | 123210156 | 123210346 | STAG2       |
| chrX | 123211781 | 123211933 | STAG2       |
| chrX | 123215204 | 123215403 | STAG2       |
| chrX | 123217245 | 123217424 | STAG2       |
| chrX | 123220371 | 123220645 | STAG2       |
| chrX | 123224399 | 123224639 | STAG2       |
| chrX | 123224678 | 123224839 | STAG2       |
| chrX | 123227842 | 123228019 | STAG2       |
| chrX | 123229196 | 123229324 | STAG2       |
| chrX | 123234398 | 123234472 | STAG2       |
| chrX | 133511622 | 133511810 | PHF6        |
| chrX | 133512009 | 133512161 | PHF6        |
| chrX | 133527505 | 133527689 | PHF6        |
| chrX | 133527913 | 133528007 | PHF6        |
| chrX | 133547492 | 133547712 | PHF6        |
| chrX | 133547827 | 133548021 | PHF6        |
| chrX | 133549020 | 133549277 | PHF6        |
| chrX | 133551173 | 133551361 | PHF6        |
| chrX | 133559205 | 133559385 | PHF6        |
| chrX | 153760189 | 153760330 | G6PD        |
| chrX | 153760377 | 153760520 | G6PD        |
| chrX | 153760575 | 153760702 | G6PD        |
| chrX | 153760756 | 153761042 | G6PD        |
| chrX | 153761131 | 153761368 | G6PD        |
| chrX | 153761765 | 153762047 | G6PD        |
| chrX | 153762224 | 153762400 | G6PD        |
| chrX | 153762527 | 153762736 | G6PD        |
| chrX | 153763357 | 153763625 | G6PD        |
| chrX | 153764126 | 153764285 | G6PD        |
| chrX | 153764330 | 153764418 | G6PD        |
| chrX | 153774225 | 153774403 | G6PD, IKBKG |
| chrX | 153774978 | 153775110 | G6PD, IKBKG |
| chrY | 1264861   | 1265039   |             |
| chrY | 1267393   | 1267606   |             |
| chrY | 1267764   | 1268033   |             |
| chrY | 1271246   | 1271430   |             |
| chrY | 1275300   | 1275517   |             |
| chrY | 1277673   | 1277826   |             |
| chrY | 1281423   | 1281552   |             |
