# Supplementary material for: Cancer immune control needs senescence induction by interferon-dependent cell cycle regulator pathways in tumours
Source: PubMed Central journal article supplement (PMC7067802; doi:10.1038/s41467-020-14987-6), 2020-03-12
Supplement: 41467_2020_14987_MOESM6_ESM.pdf [file 41467_2020_14987_MOESM6_ESM.pdf]

Supplementary Data 3 Custom gene panel ssSCv4

| Chr   | start     | end       | Gene       | Probegroup          |
|-------|-----------|-----------|------------|---------------------|
| chr12 | 133263827 | 133264427 | POLE       | 7_promotor-regions  |
| chr19 | 50887104  | 50887704  | POLD1      | 7_promotor-regions  |
| chr19 | 50901589  | 50902189  | POLD1      | 7_promotor-regions  |
| chr2  | 47629806  | 47630406  | MSH2       | 7_promotor-regions  |
| chr2  | 47636848  | 47637448  | MSH2       | 7_promotor-regions  |
| chr2  | 48009784  | 48010384  | MSH6       | 7_promotor-regions  |
| chr3  | 37034478  | 37035078  | MLH1       | 7_promotor-regions  |
| chr3  | 37034803  | 37035403  | MLH1       | 7_promotor-regions  |
| chr3  | 37053024  | 37053624  | MLH1       | 7_promotor-regions  |
| chr5  | 1294967   | 1295567   | TERT       | 7_promotor-regions  |
| chr5  | 1295166   | 1295311   | TERT       | 7_promotor-regions  |
| chr7  | 6048579   | 6049179   | PMS2       | 7_promotor-regions  |
| chr7  | 99262809  | 99262860  | rs10264272 | IKP_SNPs            |
| chr10 | 96741027  | 96741078  | rs1057910  | IKP_SNPs            |
| chr6  | 29913272  | 29913323  | rs1061235  | IKP_SNPs            |
| chr22 | 42526668  | 42526719  | rs1065852  | IKP_SNPs            |
| chr6  | 18130892  | 18130943  | rs1142345  | IKP_SNPs            |
| chr10 | 96521631  | 96521682  | rs12248560 | IKP_SNPs            |
| chr6  | 29746843  | 29746894  | rs1633021  | IKP_SNPs            |
| chr10 | 96535220  | 96535271  | rs17884712 | IKP_SNPs            |
| chr10 | 96702021  | 96702072  | rs1799853  | IKP_SNPs            |
| chr6  | 18139202  | 18139253  | rs1800460  | IKP_SNPs            |
| chr6  | 18143929  | 18143980  | rs1800462  | IKP_SNPs            |
| chr19 | 41515237  | 41515288  | rs2279343  | IKP_SNPs            |
| chr6  | 31431754  | 31431805  | rs2395029  | IKP_SNPs            |
| chr10 | 96740955  | 96741006  | rs28371685 | IKP_SNPs            |
| chr10 | 96741032  | 96741083  | rs28371686 | IKP_SNPs            |
| chr22 | 42525746  | 42525797  | rs28371706 | IKP_SNPs            |
| chr22 | 42523779  | 42523830  | rs28371725 | IKP_SNPs            |
| chr19 | 41518195  | 41518246  | rs28399499 | IKP_SNPs            |
| chr10 | 96522437  | 96522488  | rs28399504 | IKP_SNPs            |
| chr6  | 30946122  | 30946173  | rs2844682  | IKP_SNPs            |
| chr2  | 234669593 | 234669644 | rs35350960 | IKP_SNPs            |
| chr22 | 42524218  | 42524269  | rs35742686 | IKP_SNPs            |
| chr19 | 41512815  | 41512866  | rs3745274  | IKP_SNPs            |
| chr22 | 42524921  | 42524972  | rs3892097  | IKP_SNPs            |
| chr6  | 30699358  | 30699409  | rs3909184  | IKP_SNPs            |
| chr1  | 97915588  | 97915639  | rs3918290  | IKP_SNPs            |
| chr10 | 96535147  | 96535198  | rs41291556 | IKP_SNPs            |
| chr7  | 99250368  | 99250418  | rs41303343 | IKP_SNPs            |
| chr2  | 234669118 | 234669169 | rs4148323  | IKP_SNPs            |
| chr12 | 21331523  | 21331574  | rs4149056  | IKP_SNPs            |
| chr10 | 96541590  | 96541641  | rs4244285  | IKP_SNPs            |
| chr10 | 96540384  | 96540435  | rs4986893  | IKP_SNPs            |
| chr22 | 42525060  | 42525111  | rs5030655  | IKP_SNPs            |
| chr22 | 42524150  | 42524203  | rs5030656  | IKP_SNPs            |
| chr22 | 42525009  | 42525060  | rs5030865  | IKP_SNPs            |
| chr1  | 97981317  | 97981368  | rs55886062 | IKP_SNPs            |
| chr1  | 98039393  | 98039444  | rs56038477 | IKP_SNPs            |
| chr10 | 96612469  | 96612520  | rs56337013 | IKP_SNPs            |
| chr1  | 169519023 | 169519074 | rs6025     | IKP_SNPs            |
| chr10 | 96541589  | 96541640  | rs6413438  | IKP_SNPs            |
| chr1  | 97547921  | 97547972  | rs67376798 | IKP_SNPs            |
| chr7  | 99270513  | 99270564  | rs776746   | IKP_SNPs            |
| chr2  | 234668855 | 234668907 | rs8175347  | IKP_SNPs            |
| chr16 | 31104852  | 31104903  | rs9934438  | IKP_SNPs            |
| chr18 | 19995535  | 19997774  | CTAGE1     | QC_SNPs_and_regions |
| chr1  | 152057441 | 152060019 | TCHHL1     | QC_SNPs_and_regions |
| chr9  | 5919682   | 5923309   | KIAA2026   | QC_SNPs_and_regions |
| chr9  | 13150505  | 13150556  | rs10756457 | QC_SNPs_and_regions |
| chr4  | 68780373  | 68780424  | rs1371932  | QC_SNPs_and_regions |
| chr15 | 27772650  | 27772701  | rs140679   | QC_SNPs_and_regions |
| chr4  | 85762359  | 85762410  | rs2046402  | QC_SNPs_and_regions |
| chr6  | 26091310  | 26091361  | rs2071303  | QC_SNPs_and_regions |
| chr6  | 49425495  | 49425546  | rs2229384  | QC_SNPs_and_regions |
| chr1  | 183542361 | 183542412 | rs2274064  | QC_SNPs_and_regions |
| chr1  | 45973902  | 45973953  | rs2275276  | QC_SNPs_and_regions |
| chr6  | 101166069 | 101166120 | rs41288423 | QC_SNPs_and_regions |
| chr12 | 72416209  | 72416260  | rs4290270  | QC_SNPs_and_regions |
| chr13 | 78475287  | 78475338  | rs5351     | QC_SNPs_and_regions |
| chr13 | 47469914  | 47469965  | rs6313     | QC_SNPs_and_regions |
| chr3  | 193209152 | 193209203 | rs6788448  | QC_SNPs_and_regions |
| chr6  | 79679551  | 79679602  | rs7742431  | QC_SNPs_and_regions |
| chr10 | 123239535 | 123243211 | FGFR2      | selected_fusions    |
| chr10 | 43604678  | 43606654  | RET        | selected_fusions    |
| chr10 | 43606913  | 43607546  | RET        | selected_fusions    |
| chr10 | 43608411  | 43609003  | RET        | selected_fusions    |
| chr10 | 43609123  | 43609927  | RET        | selected_fusions    |

|       |           |           |          |                    |
|-------|-----------|-----------|----------|--------------------|
| chr10 | 43610184  | 43612031  | RET      | selected_fusions   |
| chr12 | 12022903  | 12037378  | ETV6     | selected_fusions   |
| chr15 | 34638236  | 34640169  | C15orf55 | selected_fusions   |
| chr16 | 31195717  | 31196259  | FUS      | selected_fusions   |
| chr16 | 31196500  | 31198122  | FUS      | selected_fusions   |
| chr16 | 31198157  | 31199645  | FUS      | selected_fusions   |
| chr16 | 31200547  | 31200985  | FUS      | selected_fusions   |
| chr17 | 30264503  | 30267304  | SUZ12    | selected_fusions   |
| chr17 | 34149837  | 34151081  | TAF15    | selected_fusions   |
| chr17 | 38487648  | 38504567  | RARA     | selected_fusions   |
| chr19 | 1615519   | 1615684   | TCF3     | selected_fusions   |
| chr19 | 1615820   | 1619109   | TCF3     | selected_fusions   |
| chr1  | 156843751 | 156844174 | NTRK1    | selected_fusions   |
| chr1  | 156844192 | 156844362 | NTRK1    | selected_fusions   |
| chr1  | 156844418 | 156844697 | NTRK1    | selected_fusions   |
| chr21 | 42866505  | 42870045  | TMPRSS2  | selected_fusions   |
| chr21 | 42870116  | 42879876  | TMPRSS2  | selected_fusions   |
| chr22 | 23524426  | 23595985  | BCR      | selected_fusions   |
| chr22 | 23631808  | 23632525  | BCR      | selected_fusions   |
| chr22 | 23632600  | 23634727  | BCR      | selected_fusions   |
| chr22 | 23654023  | 23655073  | BCR      | selected_fusions   |
| chr22 | 29683123  | 29684594  | EWSR1    | selected_fusions   |
| chr22 | 29684775  | 29687553  | EWSR1    | selected_fusions   |
| chr22 | 29687588  | 29688125  | EWSR1    | selected_fusions   |
| chr22 | 29688158  | 29688476  | EWSR1    | selected_fusions   |
| chr22 | 29688595  | 29692228  | EWSR1    | selected_fusions   |
| chr22 | 29692358  | 29693816  | EWSR1    | selected_fusions   |
| chr22 | 29693939  | 29694722  | EWSR1    | selected_fusions   |
| chr22 | 39631879  | 39639905  | PDGFB    | selected_fusions   |
| chr2  | 113977755 | 113984731 | PAX8     | selected_fusions   |
| chr2  | 113984833 | 113992970 | PAX8     | selected_fusions   |
| chr2  | 113993159 | 113994177 | PAX8     | selected_fusions   |
| chr2  | 113994298 | 113999127 | PAX8     | selected_fusions   |
| chr2  | 223066909 | 223084858 | PAX3     | selected_fusions   |
| chr2  | 223085073 | 223085940 | PAX3     | selected_fusions   |
| chr2  | 29446394  | 29448326  | ALK      | selected_fusions   |
| chr3  | 12641307  | 12641650  | RAF1     | selected_fusions   |
| chr3  | 12641914  | 12645634  | RAF1     | selected_fusions   |
| chr4  | 1808661   | 1808842   | FGFR3    | selected_fusions   |
| chr6  | 117641193 | 117642421 | ROS1     | selected_fusions   |
| chr6  | 117642557 | 117645494 | ROS1     | selected_fusions   |
| chr6  | 117645578 | 117647386 | ROS1     | selected_fusions   |
| chr6  | 117647577 | 117650491 | ROS1     | selected_fusions   |
| chr6  | 117650609 | 117658334 | ROS1     | selected_fusions   |
| chr6  | 135515598 | 135516885 | MYB      | selected_fusions   |
| chr6  | 135521553 | 135522776 | MYB      | selected_fusions   |
| chr6  | 135524462 | 135539001 | MYB      | selected_fusions   |
| chr7  | 13978871  | 14017051  | ETV1     | selected_fusions   |
| chr7  | 14027798  | 14028632  | ETV1     | selected_fusions   |
| chr7  | 140481493 | 140482820 | BRAF     | selected_fusions   |
| chr7  | 140482957 | 140487347 | BRAF     | selected_fusions   |
| chr7  | 140487384 | 140494107 | BRAF     | selected_fusions   |
| chr7  | 140494267 | 140500161 | BRAF     | selected_fusions   |
| chr7  | 55221845  | 55223522  | EGFR     | selected_fusions   |
| chr8  | 38271322  | 38271435  | FGFR1    | selected_fusions   |
| chr9  | 87285875  | 87317073  | NTRK2    | selected_fusions   |
| chrX  | 48121250  | 48123216  | SSX1     | selected_fusions   |
| chrX  | 48891766  | 48895534  | TFE3     | selected_fusions   |
| chrX  | 48895639  | 48895721  | TFE3     | selected_fusions   |
| chrX  | 48895967  | 48896631  | TFE3     | selected_fusions   |
| chr7  | 87133533  | 87133790  | ABCB1    | 693_selected_genes |
| chr7  | 87135187  | 87135384  | ABCB1    | 693_selected_genes |
| chr7  | 87138565  | 87138822  | ABCB1    | 693_selected_genes |
| chr7  | 87144521  | 87144769  | ABCB1    | 693_selected_genes |
| chr7  | 87145799  | 87146006  | ABCB1    | 693_selected_genes |
| chr7  | 87148616  | 87148807  | ABCB1    | 693_selected_genes |
| chr7  | 87150066  | 87150217  | ABCB1    | 693_selected_genes |
| chr7  | 87160584  | 87160838  | ABCB1    | 693_selected_genes |
| chr7  | 87165748  | 87165882  | ABCB1    | 693_selected_genes |
| chr7  | 87168558  | 87168686  | ABCB1    | 693_selected_genes |
| chr7  | 87170647  | 87170805  | ABCB1    | 693_selected_genes |
| chr7  | 87173419  | 87173616  | ABCB1    | 693_selected_genes |
| chr7  | 87174113  | 87174340  | ABCB1    | 693_selected_genes |
| chr7  | 87175153  | 87175365  | ABCB1    | 693_selected_genes |
| chr7  | 87178638  | 87178859  | ABCB1    | 693_selected_genes |
| chr7  | 87179141  | 87179395  | ABCB1    | 693_selected_genes |
| chr7  | 87179461  | 87179637  | ABCB1    | 693_selected_genes |
| chr7  | 87179758  | 87179919  | ABCB1    | 693_selected_genes |
| chr7  | 87180015  | 87180179  | ABCB1    | 693_selected_genes |
| chr7  | 87183051  | 87183273  | ABCB1    | 693_selected_genes |
| chr7  | 87190553  | 87190728  | ABCB1    | 693_selected_genes |
| chr7  | 87195360  | 87195582  | ABCB1    | 693_selected_genes |
| chr7  | 87196075  | 87196317  | ABCB1    | 693_selected_genes |
| chr7  | 87199462  | 87199564  | ABCB1    | 693_selected_genes |

|       |           |           |       |                    |
|-------|-----------|-----------|-------|--------------------|
| chr7  | 87214802  | 87215021  | ABCB1 | 693_selected_genes |
| chr7  | 87225056  | 87225155  | ABCB1 | 693_selected_genes |
| chr7  | 87229407  | 87229525  | ABCB1 | 693_selected_genes |
| chr10 | 101542576 | 101542659 | ABCC2 | 693_selected_genes |
| chr10 | 101544339 | 101544563 | ABCC2 | 693_selected_genes |
| chr10 | 101551965 | 101552141 | ABCC2 | 693_selected_genes |
| chr10 | 101553282 | 101553467 | ABCC2 | 693_selected_genes |
| chr10 | 101553623 | 101553781 | ABCC2 | 693_selected_genes |
| chr10 | 101554144 | 101554250 | ABCC2 | 693_selected_genes |
| chr10 | 101556828 | 101557128 | ABCC2 | 693_selected_genes |
| chr10 | 101558938 | 101559152 | ABCC2 | 693_selected_genes |
| chr10 | 101560117 | 101560345 | ABCC2 | 693_selected_genes |
| chr10 | 101563750 | 101564055 | ABCC2 | 693_selected_genes |
| chr10 | 101565113 | 101565229 | ABCC2 | 693_selected_genes |
| chr10 | 101567115 | 101567303 | ABCC2 | 693_selected_genes |
| chr10 | 101567814 | 101568011 | ABCC2 | 693_selected_genes |
| chr10 | 101569865 | 101570000 | ABCC2 | 693_selected_genes |
| chr10 | 101571267 | 101571384 | ABCC2 | 693_selected_genes |
| chr10 | 101572749 | 101572926 | ABCC2 | 693_selected_genes |
| chr10 | 101577039 | 101577266 | ABCC2 | 693_selected_genes |
| chr10 | 101578521 | 101578739 | ABCC2 | 693_selected_genes |
| chr10 | 101578820 | 101579051 | ABCC2 | 693_selected_genes |
| chr10 | 101590038 | 101590215 | ABCC2 | 693_selected_genes |
| chr10 | 101590447 | 101590633 | ABCC2 | 693_selected_genes |
| chr10 | 101591342 | 101591612 | ABCC2 | 693_selected_genes |
| chr10 | 101591708 | 101591913 | ABCC2 | 693_selected_genes |
| chr10 | 101594111 | 101594317 | ABCC2 | 693_selected_genes |
| chr10 | 101595822 | 101596072 | ABCC2 | 693_selected_genes |
| chr10 | 101601698 | 101601875 | ABCC2 | 693_selected_genes |
| chr10 | 101603530 | 101603682 | ABCC2 | 693_selected_genes |
| chr10 | 101604053 | 101604247 | ABCC2 | 693_selected_genes |
| chr10 | 101605355 | 101605564 | ABCC2 | 693_selected_genes |
| chr10 | 101606692 | 101606909 | ABCC2 | 693_selected_genes |
| chr10 | 101610333 | 101610578 | ABCC2 | 693_selected_genes |
| chr10 | 101611233 | 101611413 | ABCC2 | 693_selected_genes |
| chr13 | 95673803  | 95673961  | ABCC4 | 693_selected_genes |
| chr13 | 95686833  | 95687018  | ABCC4 | 693_selected_genes |
| chr13 | 95695910  | 95696066  | ABCC4 | 693_selected_genes |
| chr13 | 95696494  | 95696717  | ABCC4 | 693_selected_genes |
| chr13 | 95705323  | 95705463  | ABCC4 | 693_selected_genes |
| chr13 | 95714932  | 95715138  | ABCC4 | 693_selected_genes |
| chr13 | 95723890  | 95724132  | ABCC4 | 693_selected_genes |
| chr13 | 95725432  | 95725583  | ABCC4 | 693_selected_genes |
| chr13 | 95726442  | 95726603  | ABCC4 | 693_selected_genes |
| chr13 | 95727660  | 95727830  | ABCC4 | 693_selected_genes |
| chr13 | 95735368  | 95735569  | ABCC4 | 693_selected_genes |
| chr13 | 95748363  | 95748458  | ABCC4 | 693_selected_genes |
| chr13 | 95768150  | 95768280  | ABCC4 | 693_selected_genes |
| chr13 | 95813417  | 95813614  | ABCC4 | 693_selected_genes |
| chr13 | 95815350  | 95815495  | ABCC4 | 693_selected_genes |
| chr13 | 95815838  | 95815926  | ABCC4 | 693_selected_genes |
| chr13 | 95816606  | 95816797  | ABCC4 | 693_selected_genes |
| chr13 | 95818386  | 95818646  | ABCC4 | 693_selected_genes |
| chr13 | 95822760  | 95822907  | ABCC4 | 693_selected_genes |
| chr13 | 95829935  | 95830072  | ABCC4 | 693_selected_genes |
| chr13 | 95830225  | 95830370  | ABCC4 | 693_selected_genes |
| chr13 | 95838929  | 95839171  | ABCC4 | 693_selected_genes |
| chr13 | 95840681  | 95840821  | ABCC4 | 693_selected_genes |
| chr13 | 95847064  | 95847216  | ABCC4 | 693_selected_genes |
| chr13 | 95858760  | 95859060  | ABCC4 | 693_selected_genes |
| chr13 | 95860028  | 95860204  | ABCC4 | 693_selected_genes |
| chr13 | 95861662  | 95861876  | ABCC4 | 693_selected_genes |
| chr13 | 95862920  | 95863060  | ABCC4 | 693_selected_genes |
| chr13 | 95886838  | 95887113  | ABCC4 | 693_selected_genes |
| chr13 | 95899203  | 95899374  | ABCC4 | 693_selected_genes |
| chr13 | 95899871  | 95900032  | ABCC4 | 693_selected_genes |
| chr13 | 95921650  | 95921701  | ABCC4 | 693_selected_genes |
| chr13 | 95953469  | 95953593  | ABCC4 | 693_selected_genes |
| chr4  | 89013360  | 89013558  | ABCG2 | 693_selected_genes |
| chr4  | 89015703  | 89015836  | ABCG2 | 693_selected_genes |
| chr4  | 89016646  | 89016786  | ABCG2 | 693_selected_genes |
| chr4  | 89018579  | 89018784  | ABCG2 | 693_selected_genes |
| chr4  | 89020450  | 89020625  | ABCG2 | 693_selected_genes |
| chr4  | 89022356  | 89022496  | ABCG2 | 693_selected_genes |
| chr4  | 89028310  | 89028443  | ABCG2 | 693_selected_genes |
| chr4  | 89034429  | 89034730  | ABCG2 | 693_selected_genes |
| chr4  | 89036083  | 89036235  | ABCG2 | 693_selected_genes |
| chr4  | 89039235  | 89039437  | ABCG2 | 693_selected_genes |
| chr4  | 89042761  | 89042969  | ABCG2 | 693_selected_genes |
| chr4  | 89052187  | 89052390  | ABCG2 | 693_selected_genes |
| chr4  | 89052929  | 89053094  | ABCG2 | 693_selected_genes |
| chr4  | 89053702  | 89053812  | ABCG2 | 693_selected_genes |
| chr4  | 89060919  | 89061191  | ABCG2 | 693_selected_genes |
| chr4  | 89079703  | 89079848  | ABCG2 | 693_selected_genes |

|       |           |           |        |                    |
|-------|-----------|-----------|--------|--------------------|
| chr4  | 89080331  | 89080416  | ABCG2  | 693_selected_genes |
| chr9  | 133589681 | 133589867 | ABL1   | 693_selected_genes |
| chr9  | 133710808 | 133710937 | ABL1   | 693_selected_genes |
| chr9  | 133729425 | 133729649 | ABL1   | 693_selected_genes |
| chr9  | 133730162 | 133730508 | ABL1   | 693_selected_genes |
| chr9  | 133738124 | 133738447 | ABL1   | 693_selected_genes |
| chr9  | 133747490 | 133747625 | ABL1   | 693_selected_genes |
| chr9  | 133748221 | 133748449 | ABL1   | 693_selected_genes |
| chr9  | 133750229 | 133750464 | ABL1   | 693_selected_genes |
| chr9  | 133753776 | 133753979 | ABL1   | 693_selected_genes |
| chr9  | 133755429 | 133755569 | ABL1   | 693_selected_genes |
| chr9  | 133755861 | 133756076 | ABL1   | 693_selected_genes |
| chr9  | 133759330 | 133761095 | ABL1   | 693_selected_genes |
| chr1  | 179076827 | 179078601 | ABL2   | 693_selected_genes |
| chr1  | 179079391 | 179079615 | ABL2   | 693_selected_genes |
| chr1  | 179079914 | 179080005 | ABL2   | 693_selected_genes |
| chr1  | 179081418 | 179081558 | ABL2   | 693_selected_genes |
| chr1  | 179083987 | 179084190 | ABL2   | 693_selected_genes |
| chr1  | 179086373 | 179086676 | ABL2   | 693_selected_genes |
| chr1  | 179087696 | 179087924 | ABL2   | 693_selected_genes |
| chr1  | 179089299 | 179089434 | ABL2   | 693_selected_genes |
| chr1  | 179090704 | 179091027 | ABL2   | 693_selected_genes |
| chr1  | 179095486 | 179095832 | ABL2   | 693_selected_genes |
| chr1  | 179100420 | 179100641 | ABL2   | 693_selected_genes |
| chr1  | 179102421 | 179102534 | ABL2   | 693_selected_genes |
| chr1  | 179112042 | 179112204 | ABL2   | 693_selected_genes |
| chr1  | 179198350 | 179198557 | ABL2   | 693_selected_genes |
| chr9  | 32405479  | 32405626  | ACO1   | 693_selected_genes |
| chr9  | 32407233  | 32407452  | ACO1   | 693_selected_genes |
| chr9  | 32408486  | 32408674  | ACO1   | 693_selected_genes |
| chr9  | 32418100  | 32418220  | ACO1   | 693_selected_genes |
| chr9  | 32418300  | 32418534  | ACO1   | 693_selected_genes |
| chr9  | 32419010  | 32419200  | ACO1   | 693_selected_genes |
| chr9  | 32420828  | 32421050  | ACO1   | 693_selected_genes |
| chr9  | 32423291  | 32423442  | ACO1   | 693_selected_genes |
| chr9  | 32424521  | 32424688  | ACO1   | 693_selected_genes |
| chr9  | 32425810  | 32426020  | ACO1   | 693_selected_genes |
| chr9  | 32427273  | 32427459  | ACO1   | 693_selected_genes |
| chr9  | 32429391  | 32429526  | ACO1   | 693_selected_genes |
| chr9  | 32430390  | 32430597  | ACO1   | 693_selected_genes |
| chr9  | 32431691  | 32431866  | ACO1   | 693_selected_genes |
| chr9  | 32433700  | 32433855  | ACO1   | 693_selected_genes |
| chr9  | 32434531  | 32434724  | ACO1   | 693_selected_genes |
| chr9  | 32436222  | 32436420  | ACO1   | 693_selected_genes |
| chr9  | 32440437  | 32440610  | ACO1   | 693_selected_genes |
| chr9  | 32448868  | 32449104  | ACO1   | 693_selected_genes |
| chr9  | 32449970  | 32450134  | ACO1   | 693_selected_genes |
| chr9  | 32450184  | 32450243  | ACO1   | 693_selected_genes |
| chr7  | 5567353   | 5567547   | ACTB   | 693_selected_genes |
| chr7  | 5567609   | 5567841   | ACTB   | 693_selected_genes |
| chr7  | 5567886   | 5568375   | ACTB   | 693_selected_genes |
| chr7  | 5568650   | 5568715   | ACTB   | 693_selected_genes |
| chr7  | 5568766   | 5569056   | ACTB   | 693_selected_genes |
| chr7  | 5569140   | 5569319   | ACTB   | 693_selected_genes |
| chr7  | 5569411   | 5569464   | ACTB   | 693_selected_genes |
| chr12 | 52345502  | 52345643  | ACVR1B | 693_selected_genes |
| chr12 | 52369023  | 52369313  | ACVR1B | 693_selected_genes |
| chr12 | 52370085  | 52370384  | ACVR1B | 693_selected_genes |
| chr12 | 52374727  | 52375008  | ACVR1B | 693_selected_genes |
| chr12 | 52376444  | 52376617  | ACVR1B | 693_selected_genes |
| chr12 | 52377757  | 52377975  | ACVR1B | 693_selected_genes |
| chr12 | 52378950  | 52379157  | ACVR1B | 693_selected_genes |
| chr12 | 52380576  | 52380954  | ACVR1B | 693_selected_genes |
| chr12 | 52385621  | 52385841  | ACVR1B | 693_selected_genes |
| chr12 | 52387743  | 52387919  | ACVR1B | 693_selected_genes |
| chr2  | 148602696 | 148602801 | ACVR2A | 693_selected_genes |
| chr2  | 148653844 | 148654102 | ACVR2A | 693_selected_genes |
| chr2  | 148657001 | 148657161 | ACVR2A | 693_selected_genes |
| chr2  | 148657287 | 148657492 | ACVR2A | 693_selected_genes |
| chr2  | 148672734 | 148672928 | ACVR2A | 693_selected_genes |
| chr2  | 148674826 | 148675020 | ACVR2A | 693_selected_genes |
| chr2  | 148675990 | 148676186 | ACVR2A | 693_selected_genes |
| chr2  | 148677773 | 148677938 | ACVR2A | 693_selected_genes |
| chr2  | 148680516 | 148680705 | ACVR2A | 693_selected_genes |
| chr2  | 148683574 | 148683755 | ACVR2A | 693_selected_genes |
| chr2  | 148684623 | 148684868 | ACVR2A | 693_selected_genes |
| chr15 | 58889630  | 58889865  | ADAM10 | 693_selected_genes |
| chr15 | 58891771  | 58891948  | ADAM10 | 693_selected_genes |
| chr15 | 58902470  | 58902741  | ADAM10 | 693_selected_genes |
| chr15 | 58903172  | 58903331  | ADAM10 | 693_selected_genes |
| chr15 | 58903981  | 58904215  | ADAM10 | 693_selected_genes |
| chr15 | 58913644  | 58913845  | ADAM10 | 693_selected_genes |
| chr15 | 58919873  | 58920107  | ADAM10 | 693_selected_genes |
| chr15 | 58925369  | 58925583  | ADAM10 | 693_selected_genes |

|       |          |          |        |                    |
|-------|----------|----------|--------|--------------------|
| chr15 | 58932950 | 58933184 | ADAM10 | 693_selected_genes |
| chr15 | 58936059 | 58936202 | ADAM10 | 693_selected_genes |
| chr15 | 58938228 | 58938428 | ADAM10 | 693_selected_genes |
| chr15 | 58957270 | 58957421 | ADAM10 | 693_selected_genes |
| chr15 | 58968450 | 58968517 | ADAM10 | 693_selected_genes |
| chr15 | 58971297 | 58971506 | ADAM10 | 693_selected_genes |
| chr15 | 58974369 | 58974538 | ADAM10 | 693_selected_genes |
| chr15 | 58990453 | 58990628 | ADAM10 | 693_selected_genes |
| chr15 | 59009750 | 59009951 | ADAM10 | 693_selected_genes |
| chr15 | 59041653 | 59041758 | ADAM10 | 693_selected_genes |
| chr7  | 45614117 | 45614806 | ADCY1  | 693_selected_genes |
| chr7  | 45632332 | 45632532 | ADCY1  | 693_selected_genes |
| chr7  | 45649952 | 45650121 | ADCY1  | 693_selected_genes |
| chr7  | 45662205 | 45662367 | ADCY1  | 693_selected_genes |
| chr7  | 45688243 | 45688421 | ADCY1  | 693_selected_genes |
| chr7  | 45697300 | 45697509 | ADCY1  | 693_selected_genes |
| chr7  | 45699615 | 45699807 | ADCY1  | 693_selected_genes |
| chr7  | 45701632 | 45701838 | ADCY1  | 693_selected_genes |
| chr7  | 45703862 | 45703999 | ADCY1  | 693_selected_genes |
| chr7  | 45717442 | 45717687 | ADCY1  | 693_selected_genes |
| chr7  | 45717739 | 45717887 | ADCY1  | 693_selected_genes |
| chr7  | 45719282 | 45719417 | ADCY1  | 693_selected_genes |
| chr7  | 45724552 | 45724692 | ADCY1  | 693_selected_genes |
| chr7  | 45725535 | 45725839 | ADCY1  | 693_selected_genes |
| chr7  | 45726120 | 45726297 | ADCY1  | 693_selected_genes |
| chr7  | 45742949 | 45743116 | ADCY1  | 693_selected_genes |
| chr7  | 45743173 | 45743370 | ADCY1  | 693_selected_genes |
| chr7  | 45744091 | 45744240 | ADCY1  | 693_selected_genes |
| chr7  | 45747923 | 45748088 | ADCY1  | 693_selected_genes |
| chr7  | 45750101 | 45750276 | ADCY1  | 693_selected_genes |
| chr7  | 45753266 | 45753619 | ADCY1  | 693_selected_genes |
| chr8  | 37654761 | 37655077 | ADGRA2 | 693_selected_genes |
| chr8  | 37672388 | 37672510 | ADGRA2 | 693_selected_genes |
| chr8  | 37686380 | 37686502 | ADGRA2 | 693_selected_genes |
| chr8  | 37686753 | 37686875 | ADGRA2 | 693_selected_genes |
| chr8  | 37686980 | 37687102 | ADGRA2 | 693_selected_genes |
| chr8  | 37687343 | 37687557 | ADGRA2 | 693_selected_genes |
| chr8  | 37688202 | 37688466 | ADGRA2 | 693_selected_genes |
| chr8  | 37688915 | 37689130 | ADGRA2 | 693_selected_genes |
| chr8  | 37690502 | 37690751 | ADGRA2 | 693_selected_genes |
| chr8  | 37691180 | 37691380 | ADGRA2 | 693_selected_genes |
| chr8  | 37691459 | 37691671 | ADGRA2 | 693_selected_genes |
| chr8  | 37692666 | 37692941 | ADGRA2 | 693_selected_genes |
| chr8  | 37693046 | 37693313 | ADGRA2 | 693_selected_genes |
| chr8  | 37695223 | 37695482 | ADGRA2 | 693_selected_genes |
| chr8  | 37696448 | 37696626 | ADGRA2 | 693_selected_genes |
| chr8  | 37696991 | 37697165 | ADGRA2 | 693_selected_genes |
| chr8  | 37697613 | 37697809 | ADGRA2 | 693_selected_genes |
| chr8  | 37698252 | 37698392 | ADGRA2 | 693_selected_genes |
| chr8  | 37698578 | 37699898 | ADGRA2 | 693_selected_genes |
| chr14 | 23442626 | 23442802 | AJUBA  | 693_selected_genes |
| chr14 | 23443230 | 23443349 | AJUBA  | 693_selected_genes |
| chr14 | 23444022 | 23444124 | AJUBA  | 693_selected_genes |
| chr14 | 23444157 | 23444338 | AJUBA  | 693_selected_genes |
| chr14 | 23445639 | 23445752 | AJUBA  | 693_selected_genes |
| chr14 | 23445828 | 23445946 | AJUBA  | 693_selected_genes |
| chr14 | 23447527 | 23447679 | AJUBA  | 693_selected_genes |
| chr14 | 23448116 | 23448270 | AJUBA  | 693_selected_genes |
| chr14 | 23450444 | 23451500 | AJUBA  | 693_selected_genes |
| chr7  | 91570388 | 91570486 | AKAP9  | 693_selected_genes |
| chr7  | 91599761 | 91599847 | AKAP9  | 693_selected_genes |
| chr7  | 91602999 | 91603307 | AKAP9  | 693_selected_genes |
| chr7  | 91609577 | 91609672 | AKAP9  | 693_selected_genes |
| chr7  | 91621446 | 91621550 | AKAP9  | 693_selected_genes |
| chr7  | 91622173 | 91622394 | AKAP9  | 693_selected_genes |
| chr7  | 91623909 | 91624115 | AKAP9  | 693_selected_genes |
| chr7  | 91624891 | 91625154 | AKAP9  | 693_selected_genes |
| chr7  | 91630136 | 91632574 | AKAP9  | 693_selected_genes |
| chr7  | 91641717 | 91641981 | AKAP9  | 693_selected_genes |
| chr7  | 91643537 | 91643667 | AKAP9  | 693_selected_genes |
| chr7  | 91645417 | 91645606 | AKAP9  | 693_selected_genes |
| chr7  | 91646305 | 91646441 | AKAP9  | 693_selected_genes |
| chr7  | 91651526 | 91651691 | AKAP9  | 693_selected_genes |
| chr7  | 91652102 | 91652348 | AKAP9  | 693_selected_genes |
| chr7  | 91659183 | 91659330 | AKAP9  | 693_selected_genes |
| chr7  | 91660800 | 91660943 | AKAP9  | 693_selected_genes |
| chr7  | 91667707 | 91668111 | AKAP9  | 693_selected_genes |
| chr7  | 91669962 | 91670237 | AKAP9  | 693_selected_genes |
| chr7  | 91671334 | 91671525 | AKAP9  | 693_selected_genes |
| chr7  | 91671956 | 91672110 | AKAP9  | 693_selected_genes |
| chr7  | 91674296 | 91674552 | AKAP9  | 693_selected_genes |
| chr7  | 91682014 | 91682297 | AKAP9  | 693_selected_genes |
| chr7  | 91690548 | 91690761 | AKAP9  | 693_selected_genes |
| chr7  | 91691562 | 91691825 | AKAP9  | 693_selected_genes |

|       |           |           |       |                    |
|-------|-----------|-----------|-------|--------------------|
| chr7  | 91694519  | 91694802  | AKAP9 | 693_selected_genes |
| chr7  | 91695715  | 91695885  | AKAP9 | 693_selected_genes |
| chr7  | 91699318  | 91699545  | AKAP9 | 693_selected_genes |
| chr7  | 91700193  | 91700348  | AKAP9 | 693_selected_genes |
| chr7  | 91706143  | 91706346  | AKAP9 | 693_selected_genes |
| chr7  | 91706984  | 91707214  | AKAP9 | 693_selected_genes |
| chr7  | 91708367  | 91709491  | AKAP9 | 693_selected_genes |
| chr7  | 91711810  | 91712001  | AKAP9 | 693_selected_genes |
| chr7  | 91712458  | 91713034  | AKAP9 | 693_selected_genes |
| chr7  | 91713928  | 91714042  | AKAP9 | 693_selected_genes |
| chr7  | 91714107  | 91714279  | AKAP9 | 693_selected_genes |
| chr7  | 91714783  | 91715025  | AKAP9 | 693_selected_genes |
| chr7  | 91715516  | 91715755  | AKAP9 | 693_selected_genes |
| chr7  | 91718673  | 91719032  | AKAP9 | 693_selected_genes |
| chr7  | 91722385  | 91722655  | AKAP9 | 693_selected_genes |
| chr7  | 91724311  | 91724512  | AKAP9 | 693_selected_genes |
| chr7  | 91725977  | 91726696  | AKAP9 | 693_selected_genes |
| chr7  | 91726874  | 91727133  | AKAP9 | 693_selected_genes |
| chr7  | 91727397  | 91727553  | AKAP9 | 693_selected_genes |
| chr7  | 91728975  | 91729208  | AKAP9 | 693_selected_genes |
| chr7  | 91730144  | 91730395  | AKAP9 | 693_selected_genes |
| chr7  | 91731882  | 91732165  | AKAP9 | 693_selected_genes |
| chr7  | 91734966  | 91735102  | AKAP9 | 693_selected_genes |
| chr7  | 91736581  | 91736761  | AKAP9 | 693_selected_genes |
| chr7  | 91737782  | 91738058  | AKAP9 | 693_selected_genes |
| chr7  | 91739410  | 91739498  | AKAP9 | 693_selected_genes |
| chr14 | 105235897 | 105235988 | AKT1  | 693_selected_genes |
| chr14 | 105236652 | 105236782 | AKT1  | 693_selected_genes |
| chr14 | 105237056 | 105237209 | AKT1  | 693_selected_genes |
| chr14 | 105238676 | 105238814 | AKT1  | 693_selected_genes |
| chr14 | 105239189 | 105239454 | AKT1  | 693_selected_genes |
| chr14 | 105239562 | 105239741 | AKT1  | 693_selected_genes |
| chr14 | 105239766 | 105239942 | AKT1  | 693_selected_genes |
| chr14 | 105240223 | 105240342 | AKT1  | 693_selected_genes |
| chr14 | 105241249 | 105241365 | AKT1  | 693_selected_genes |
| chr14 | 105241387 | 105241569 | AKT1  | 693_selected_genes |
| chr14 | 105241963 | 105242161 | AKT1  | 693_selected_genes |
| chr14 | 105242970 | 105243132 | AKT1  | 693_selected_genes |
| chr14 | 105246399 | 105246578 | AKT1  | 693_selected_genes |
| chr14 | 105258909 | 105259005 | AKT1  | 693_selected_genes |
| chr19 | 40739753  | 40739883  | AKT2  | 693_selected_genes |
| chr19 | 40740361  | 40740503  | AKT2  | 693_selected_genes |
| chr19 | 40740753  | 40741079  | AKT2  | 693_selected_genes |
| chr19 | 40741144  | 40741282  | AKT2  | 693_selected_genes |
| chr19 | 40741321  | 40741399  | AKT2  | 693_selected_genes |
| chr19 | 40741771  | 40742036  | AKT2  | 693_selected_genes |
| chr19 | 40742138  | 40742317  | AKT2  | 693_selected_genes |
| chr19 | 40743850  | 40744023  | AKT2  | 693_selected_genes |
| chr19 | 40744786  | 40744905  | AKT2  | 693_selected_genes |
| chr19 | 40745926  | 40746053  | AKT2  | 693_selected_genes |
| chr19 | 40746143  | 40746226  | AKT2  | 693_selected_genes |
| chr19 | 40747819  | 40748001  | AKT2  | 693_selected_genes |
| chr19 | 40748415  | 40748619  | AKT2  | 693_selected_genes |
| chr19 | 40750292  | 40750346  | AKT2  | 693_selected_genes |
| chr19 | 40761038  | 40761231  | AKT2  | 693_selected_genes |
| chr19 | 40762807  | 40762986  | AKT2  | 693_selected_genes |
| chr19 | 40771103  | 40771199  | AKT2  | 693_selected_genes |
| chr1  | 243663019 | 243663113 | AKT3  | 693_selected_genes |
| chr1  | 243668525 | 243668661 | AKT3  | 693_selected_genes |
| chr1  | 243675600 | 243675753 | AKT3  | 693_selected_genes |
| chr1  | 243708786 | 243708924 | AKT3  | 693_selected_genes |
| chr1  | 243716005 | 243716270 | AKT3  | 693_selected_genes |
| chr1  | 243726996 | 243727175 | AKT3  | 693_selected_genes |
| chr1  | 243736202 | 243736375 | AKT3  | 693_selected_genes |
| chr1  | 243776947 | 243777066 | AKT3  | 693_selected_genes |
| chr1  | 243778372 | 243778488 | AKT3  | 693_selected_genes |
| chr1  | 243800887 | 243801069 | AKT3  | 693_selected_genes |
| chr1  | 243809169 | 243809364 | AKT3  | 693_selected_genes |
| chr1  | 243828048 | 243828210 | AKT3  | 693_selected_genes |
| chr1  | 243858867 | 243859043 | AKT3  | 693_selected_genes |
| chr1  | 244006401 | 244006497 | AKT3  | 693_selected_genes |
| chr2  | 29416064  | 29416813  | ALK   | 693_selected_genes |
| chr2  | 29419610  | 29419751  | ALK   | 693_selected_genes |
| chr2  | 29420382  | 29420567  | ALK   | 693_selected_genes |
| chr2  | 29430011  | 29430163  | ALK   | 693_selected_genes |
| chr2  | 29430885  | 29430936  | ALK   | 693_selected_genes |
| chr2  | 29432626  | 29432769  | ALK   | 693_selected_genes |
| chr2  | 29436824  | 29436972  | ALK   | 693_selected_genes |
| chr2  | 29443546  | 29443726  | ALK   | 693_selected_genes |
| chr2  | 29443828  | 29444128  | ALK   | 693_selected_genes |
| chr2  | 29445184  | 29445299  | ALK   | 693_selected_genes |
| chr2  | 29445357  | 29445498  | ALK   | 693_selected_genes |
| chr2  | 29446182  | 29446419  | ALK   | 693_selected_genes |
| chr2  | 29448301  | 29448456  | ALK   | 693_selected_genes |

|       |          |          |         |                    |
|-------|----------|----------|---------|--------------------|
| chr2  | 29449762 | 29449965 | ALK     | 693_selected_genes |
| chr2  | 29450414 | 29450563 | ALK     | 693_selected_genes |
| chr2  | 29451724 | 29451957 | ALK     | 693_selected_genes |
| chr2  | 29455144 | 29455339 | ALK     | 693_selected_genes |
| chr2  | 29456405 | 29456587 | ALK     | 693_selected_genes |
| chr2  | 29462520 | 29462721 | ALK     | 693_selected_genes |
| chr2  | 29473945 | 29474158 | ALK     | 693_selected_genes |
| chr2  | 29497939 | 29498118 | ALK     | 693_selected_genes |
| chr2  | 29498242 | 29498387 | ALK     | 693_selected_genes |
| chr2  | 29519728 | 29519948 | ALK     | 693_selected_genes |
| chr2  | 29541144 | 29541295 | ALK     | 693_selected_genes |
| chr2  | 29543591 | 29543773 | ALK     | 693_selected_genes |
| chr2  | 29551190 | 29551372 | ALK     | 693_selected_genes |
| chr2  | 29606572 | 29606750 | ALK     | 693_selected_genes |
| chr2  | 29754755 | 29755007 | ALK     | 693_selected_genes |
| chr2  | 29917690 | 29917905 | ALK     | 693_selected_genes |
| chr2  | 29940414 | 29940588 | ALK     | 693_selected_genes |
| chr2  | 30142833 | 30143550 | ALK     | 693_selected_genes |
| chr17 | 7976063  | 7976293  | ALOX12B | 693_selected_genes |
| chr17 | 7976440  | 7976661  | ALOX12B | 693_selected_genes |
| chr17 | 7976949  | 7977100  | ALOX12B | 693_selected_genes |
| chr17 | 7978887  | 7979059  | ALOX12B | 693_selected_genes |
| chr17 | 7979467  | 7979687  | ALOX12B | 693_selected_genes |
| chr17 | 7979949  | 7980086  | ALOX12B | 693_selected_genes |
| chr17 | 7980282  | 7980536  | ALOX12B | 693_selected_genes |
| chr17 | 7982688  | 7982882  | ALOX12B | 693_selected_genes |
| chr17 | 7983061  | 7983284  | ALOX12B | 693_selected_genes |
| chr17 | 7983527  | 7983681  | ALOX12B | 693_selected_genes |
| chr17 | 7983950  | 7984123  | ALOX12B | 693_selected_genes |
| chr17 | 7984176  | 7984319  | ALOX12B | 693_selected_genes |
| chr17 | 7984398  | 7984530  | ALOX12B | 693_selected_genes |
| chr17 | 7989308  | 7989563  | ALOX12B | 693_selected_genes |
| chr17 | 7990588  | 7990785  | ALOX12B | 693_selected_genes |
| chrX  | 63405971 | 63406079 | AMER1   | 693_selected_genes |
| chrX  | 63409733 | 63413191 | AMER1   | 693_selected_genes |
| chr10 | 61802423 | 61802542 | ANK3    | 693_selected_genes |
| chr10 | 61813409 | 61813510 | ANK3    | 693_selected_genes |
| chr10 | 61815390 | 61815821 | ANK3    | 693_selected_genes |
| chr10 | 61819072 | 61819213 | ANK3    | 693_selected_genes |
| chr10 | 61819430 | 61819816 | ANK3    | 693_selected_genes |
| chr10 | 61822843 | 61823037 | ANK3    | 693_selected_genes |
| chr10 | 61823889 | 61824071 | ANK3    | 693_selected_genes |
| chr10 | 61827667 | 61827792 | ANK3    | 693_selected_genes |
| chr10 | 61828369 | 61836231 | ANK3    | 693_selected_genes |
| chr10 | 61840269 | 61840403 | ANK3    | 693_selected_genes |
| chr10 | 61841882 | 61841959 | ANK3    | 693_selected_genes |
| chr10 | 61842347 | 61842520 | ANK3    | 693_selected_genes |
| chr10 | 61843224 | 61843400 | ANK3    | 693_selected_genes |
| chr10 | 61844334 | 61844613 | ANK3    | 693_selected_genes |
| chr10 | 61844889 | 61845036 | ANK3    | 693_selected_genes |
| chr10 | 61846409 | 61846667 | ANK3    | 693_selected_genes |
| chr10 | 61847879 | 61848141 | ANK3    | 693_selected_genes |
| chr10 | 61865637 | 61865842 | ANK3    | 693_selected_genes |
| chr10 | 61867920 | 61868069 | ANK3    | 693_selected_genes |
| chr10 | 61868562 | 61868837 | ANK3    | 693_selected_genes |
| chr10 | 61873957 | 61874114 | ANK3    | 693_selected_genes |
| chr10 | 61894003 | 61894156 | ANK3    | 693_selected_genes |
| chr10 | 61898665 | 61898870 | ANK3    | 693_selected_genes |
| chr10 | 61900084 | 61900150 | ANK3    | 693_selected_genes |
| chr10 | 61905700 | 61905804 | ANK3    | 693_selected_genes |
| chr10 | 61926323 | 61926436 | ANK3    | 693_selected_genes |
| chr10 | 61926556 | 61926679 | ANK3    | 693_selected_genes |
| chr10 | 61932040 | 61932186 | ANK3    | 693_selected_genes |
| chr10 | 61932632 | 61932781 | ANK3    | 693_selected_genes |
| chr10 | 61932820 | 61932969 | ANK3    | 693_selected_genes |
| chr10 | 61941061 | 61941210 | ANK3    | 693_selected_genes |
| chr10 | 61946447 | 61946695 | ANK3    | 693_selected_genes |
| chr10 | 61955877 | 61956026 | ANK3    | 693_selected_genes |
| chr10 | 61956259 | 61956408 | ANK3    | 693_selected_genes |
| chr10 | 61958072 | 61958320 | ANK3    | 693_selected_genes |
| chr10 | 61959861 | 61960046 | ANK3    | 693_selected_genes |
| chr10 | 61962734 | 61962883 | ANK3    | 693_selected_genes |
| chr10 | 61965524 | 61965673 | ANK3    | 693_selected_genes |
| chr10 | 61967768 | 61968016 | ANK3    | 693_selected_genes |
| chr10 | 61973144 | 61973293 | ANK3    | 693_selected_genes |
| chr10 | 61994420 | 61994569 | ANK3    | 693_selected_genes |
| chr10 | 62021591 | 62021740 | ANK3    | 693_selected_genes |
| chr10 | 62023567 | 62023803 | ANK3    | 693_selected_genes |
| chr10 | 62029863 | 62030012 | ANK3    | 693_selected_genes |
| chr10 | 62038506 | 62038655 | ANK3    | 693_selected_genes |
| chr10 | 62038782 | 62038931 | ANK3    | 693_selected_genes |
| chr10 | 62039270 | 62039422 | ANK3    | 693_selected_genes |
| chr10 | 62060051 | 62060137 | ANK3    | 693_selected_genes |
| chr10 | 62149157 | 62149321 | ANK3    | 693_selected_genes |

|       |           |           |        |                    |
|-------|-----------|-----------|--------|--------------------|
| chr10 | 62332197  | 62332310  | ANK3   | 693_selected_genes |
| chr10 | 62374918  | 62375007  | ANK3   | 693_selected_genes |
| chr10 | 62492995  | 62493102  | ANK3   | 693_selected_genes |
| chr12 | 99042112  | 99042300  | APAF1  | 693_selected_genes |
| chr12 | 99042378  | 99042683  | APAF1  | 693_selected_genes |
| chr12 | 99043239  | 99043487  | APAF1  | 693_selected_genes |
| chr12 | 99052912  | 99053146  | APAF1  | 693_selected_genes |
| chr12 | 99056208  | 99056371  | APAF1  | 693_selected_genes |
| chr12 | 99056427  | 99056609  | APAF1  | 693_selected_genes |
| chr12 | 99059305  | 99059594  | APAF1  | 693_selected_genes |
| chr12 | 99059942  | 99060160  | APAF1  | 693_selected_genes |
| chr12 | 99061265  | 99061447  | APAF1  | 693_selected_genes |
| chr12 | 99064725  | 99064889  | APAF1  | 693_selected_genes |
| chr12 | 99065287  | 99065522  | APAF1  | 693_selected_genes |
| chr12 | 99071177  | 99071354  | APAF1  | 693_selected_genes |
| chr12 | 99074029  | 99074205  | APAF1  | 693_selected_genes |
| chr12 | 99076895  | 99077077  | APAF1  | 693_selected_genes |
| chr12 | 99080500  | 99080676  | APAF1  | 693_selected_genes |
| chr12 | 99093160  | 99093372  | APAF1  | 693_selected_genes |
| chr12 | 99097123  | 99097302  | APAF1  | 693_selected_genes |
| chr12 | 99100237  | 99100413  | APAF1  | 693_selected_genes |
| chr12 | 99102337  | 99102507  | APAF1  | 693_selected_genes |
| chr12 | 99106071  | 99106238  | APAF1  | 693_selected_genes |
| chr12 | 99109179  | 99109355  | APAF1  | 693_selected_genes |
| chr12 | 99116945  | 99117115  | APAF1  | 693_selected_genes |
| chr12 | 99117391  | 99117567  | APAF1  | 693_selected_genes |
| chr12 | 99119167  | 99119343  | APAF1  | 693_selected_genes |
| chr12 | 99120925  | 99121119  | APAF1  | 693_selected_genes |
| chr12 | 99126172  | 99126369  | APAF1  | 693_selected_genes |
| chr5  | 112043389 | 112043604 | APC    | 693_selected_genes |
| chr5  | 112090562 | 112090747 | APC    | 693_selected_genes |
| chr5  | 112101997 | 112102132 | APC    | 693_selected_genes |
| chr5  | 112102860 | 112103112 | APC    | 693_selected_genes |
| chr5  | 112111300 | 112111459 | APC    | 693_selected_genes |
| chr5  | 112116461 | 112116630 | APC    | 693_selected_genes |
| chr5  | 112128117 | 112128251 | APC    | 693_selected_genes |
| chr5  | 112136950 | 112137105 | APC    | 693_selected_genes |
| chr5  | 112145797 | 112145877 | APC    | 693_selected_genes |
| chr5  | 112151166 | 112151315 | APC    | 693_selected_genes |
| chr5  | 112154637 | 112155066 | APC    | 693_selected_genes |
| chr5  | 112157567 | 112157713 | APC    | 693_selected_genes |
| chr5  | 112158978 | 112159082 | APC    | 693_selected_genes |
| chr5  | 112162779 | 112162969 | APC    | 693_selected_genes |
| chr5  | 112163600 | 112163728 | APC    | 693_selected_genes |
| chr5  | 112164527 | 112164694 | APC    | 693_selected_genes |
| chr5  | 112170622 | 112170887 | APC    | 693_selected_genes |
| chr5  | 112173224 | 112179848 | APC    | 693_selected_genes |
| chr5  | 112192320 | 112192395 | APC    | 693_selected_genes |
| chr5  | 112198179 | 112198258 | APC    | 693_selected_genes |
| chr18 | 10454953  | 10455061  | APCDD1 | 693_selected_genes |
| chr18 | 10468440  | 10468674  | APCDD1 | 693_selected_genes |
| chr18 | 10471501  | 10472083  | APCDD1 | 693_selected_genes |
| chr18 | 10474077  | 10474269  | APCDD1 | 693_selected_genes |
| chr18 | 10475858  | 10476364  | APCDD1 | 693_selected_genes |
| chr18 | 10485433  | 10485805  | APCDD1 | 693_selected_genes |
| chr18 | 10487561  | 10488060  | APCDD1 | 693_selected_genes |
| chrX  | 66764963  | 66766629  | AR     | 693_selected_genes |
| chrX  | 66788819  | 66788889  | AR     | 693_selected_genes |
| chrX  | 66863072  | 66863274  | AR     | 693_selected_genes |
| chrX  | 66900536  | 66900621  | AR     | 693_selected_genes |
| chrX  | 66905826  | 66905993  | AR     | 693_selected_genes |
| chrX  | 66914489  | 66914589  | AR     | 693_selected_genes |
| chrX  | 66931218  | 66931556  | AR     | 693_selected_genes |
| chrX  | 66937294  | 66937489  | AR     | 693_selected_genes |
| chrX  | 66941649  | 66941830  | AR     | 693_selected_genes |
| chrX  | 66942643  | 66942851  | AR     | 693_selected_genes |
| chrX  | 66943502  | 66943708  | AR     | 693_selected_genes |
| chrX  | 47422341  | 47422487  | ARAF   | 693_selected_genes |
| chrX  | 47422599  | 47422753  | ARAF   | 693_selected_genes |
| chrX  | 47424170  | 47424323  | ARAF   | 693_selected_genes |
| chrX  | 47424358  | 47424563  | ARAF   | 693_selected_genes |
| chrX  | 47424616  | 47424778  | ARAF   | 693_selected_genes |
| chrX  | 47426012  | 47426204  | ARAF   | 693_selected_genes |
| chrX  | 47426257  | 47426335  | ARAF   | 693_selected_genes |
| chrX  | 47426359  | 47426555  | ARAF   | 693_selected_genes |
| chrX  | 47426603  | 47426856  | ARAF   | 693_selected_genes |
| chrX  | 47428091  | 47428318  | ARAF   | 693_selected_genes |
| chrX  | 47428360  | 47428457  | ARAF   | 693_selected_genes |
| chrX  | 47428912  | 47429081  | ARAF   | 693_selected_genes |
| chrX  | 47429266  | 47429448  | ARAF   | 693_selected_genes |
| chrX  | 47430251  | 47430436  | ARAF   | 693_selected_genes |
| chrX  | 47430696  | 47430881  | ARAF   | 693_selected_genes |
| chr20 | 62331769  | 62331907  | ARFRP1 | 693_selected_genes |
| chr20 | 62331924  | 62332079  | ARFRP1 | 693_selected_genes |

|       |           |           |          |                    |
|-------|-----------|-----------|----------|--------------------|
| chr20 | 62332516  | 62332765  | ARFRP1   | 693_selected_genes |
| chr20 | 62333156  | 62333277  | ARFRP1   | 693_selected_genes |
| chr20 | 62333462  | 62333594  | ARFRP1   | 693_selected_genes |
| chr20 | 62336964  | 62337164  | ARFRP1   | 693_selected_genes |
| chr20 | 62337683  | 62337816  | ARFRP1   | 693_selected_genes |
| chr20 | 62337977  | 62338115  | ARFRP1   | 693_selected_genes |
| chr20 | 62338325  | 62338468  | ARFRP1   | 693_selected_genes |
| chr19 | 47421907  | 47425638  | ARHGAP35 | 693_selected_genes |
| chr19 | 47440495  | 47440690  | ARHGAP35 | 693_selected_genes |
| chr19 | 47491220  | 47491348  | ARHGAP35 | 693_selected_genes |
| chr19 | 47492775  | 47492957  | ARHGAP35 | 693_selected_genes |
| chr19 | 47502535  | 47502691  | ARHGAP35 | 693_selected_genes |
| chr19 | 47503562  | 47503970  | ARHGAP35 | 693_selected_genes |
| chrX  | 135750162 | 135750353 | ARHGEF6  | 693_selected_genes |
| chrX  | 135751615 | 135751720 | ARHGEF6  | 693_selected_genes |
| chrX  | 135754153 | 135754303 | ARHGEF6  | 693_selected_genes |
| chrX  | 135757140 | 135757280 | ARHGEF6  | 693_selected_genes |
| chrX  | 135758757 | 135758901 | ARHGEF6  | 693_selected_genes |
| chrX  | 135760069 | 135760140 | ARHGEF6  | 693_selected_genes |
| chrX  | 135761668 | 135761844 | ARHGEF6  | 693_selected_genes |
| chrX  | 135762864 | 135763060 | ARHGEF6  | 693_selected_genes |
| chrX  | 135764023 | 135764152 | ARHGEF6  | 693_selected_genes |
| chrX  | 135764891 | 135765028 | ARHGEF6  | 693_selected_genes |
| chrX  | 135767810 | 135768007 | ARHGEF6  | 693_selected_genes |
| chrX  | 135770065 | 135770175 | ARHGEF6  | 693_selected_genes |
| chrX  | 135772743 | 135772932 | ARHGEF6  | 693_selected_genes |
| chrX  | 135789041 | 135789214 | ARHGEF6  | 693_selected_genes |
| chrX  | 135790808 | 135790954 | ARHGEF6  | 693_selected_genes |
| chrX  | 135795409 | 135795554 | ARHGEF6  | 693_selected_genes |
| chrX  | 135814235 | 135814356 | ARHGEF6  | 693_selected_genes |
| chrX  | 135819517 | 135819648 | ARHGEF6  | 693_selected_genes |
| chrX  | 135825718 | 135825970 | ARHGEF6  | 693_selected_genes |
| chrX  | 135827356 | 135827531 | ARHGEF6  | 693_selected_genes |
| chrX  | 135829641 | 135829776 | ARHGEF6  | 693_selected_genes |
| chrX  | 135861547 | 135861681 | ARHGEF6  | 693_selected_genes |
| chrX  | 135862851 | 135863066 | ARHGEF6  | 693_selected_genes |
| chr1  | 27022869  | 27024056  | ARID1A   | 693_selected_genes |
| chr1  | 27056116  | 27056379  | ARID1A   | 693_selected_genes |
| chr1  | 27057617  | 27058120  | ARID1A   | 693_selected_genes |
| chr1  | 27059141  | 27059308  | ARID1A   | 693_selected_genes |
| chr1  | 27087321  | 27087612  | ARID1A   | 693_selected_genes |
| chr1  | 27087849  | 27087989  | ARID1A   | 693_selected_genes |
| chr1  | 27088617  | 27088835  | ARID1A   | 693_selected_genes |
| chr1  | 27089438  | 27089801  | ARID1A   | 693_selected_genes |
| chr1  | 27092686  | 27092882  | ARID1A   | 693_selected_genes |
| chr1  | 27092922  | 27093082  | ARID1A   | 693_selected_genes |
| chr1  | 27094255  | 27094517  | ARID1A   | 693_selected_genes |
| chr1  | 27097584  | 27097842  | ARID1A   | 693_selected_genes |
| chr1  | 27098965  | 27099148  | ARID1A   | 693_selected_genes |
| chr1  | 27099277  | 27099503  | ARID1A   | 693_selected_genes |
| chr1  | 27099811  | 27100012  | ARID1A   | 693_selected_genes |
| chr1  | 27100045  | 27100233  | ARID1A   | 693_selected_genes |
| chr1  | 27100267  | 27100414  | ARID1A   | 693_selected_genes |
| chr1  | 27100794  | 27101736  | ARID1A   | 693_selected_genes |
| chr1  | 27102042  | 27102223  | ARID1A   | 693_selected_genes |
| chr1  | 27102282  | 27102416  | ARID1A   | 693_selected_genes |
| chr1  | 27105488  | 27107272  | ARID1A   | 693_selected_genes |
| chr6  | 157099038 | 157100630 | ARID1B   | 693_selected_genes |
| chr6  | 157150335 | 157150580 | ARID1B   | 693_selected_genes |
| chr6  | 157192722 | 157192811 | ARID1B   | 693_selected_genes |
| chr6  | 157222481 | 157222684 | ARID1B   | 693_selected_genes |
| chr6  | 157256574 | 157256735 | ARID1B   | 693_selected_genes |
| chr6  | 157405770 | 157406064 | ARID1B   | 693_selected_genes |
| chr6  | 157431580 | 157431720 | ARID1B   | 693_selected_genes |
| chr6  | 157454136 | 157454366 | ARID1B   | 693_selected_genes |
| chr6  | 157469732 | 157470110 | ARID1B   | 693_selected_genes |
| chr6  | 157488148 | 157488344 | ARID1B   | 693_selected_genes |
| chr6  | 157495116 | 157495276 | ARID1B   | 693_selected_genes |
| chr6  | 157495955 | 157496164 | ARID1B   | 693_selected_genes |
| chr6  | 157502077 | 157502337 | ARID1B   | 693_selected_genes |
| chr6  | 157505339 | 157505704 | ARID1B   | 693_selected_genes |
| chr6  | 157507463 | 157507764 | ARID1B   | 693_selected_genes |
| chr6  | 157510750 | 157510939 | ARID1B   | 693_selected_genes |
| chr6  | 157511146 | 157511369 | ARID1B   | 693_selected_genes |
| chr6  | 157517273 | 157517474 | ARID1B   | 693_selected_genes |
| chr6  | 157519919 | 157520066 | ARID1B   | 693_selected_genes |
| chr6  | 157521813 | 157522647 | ARID1B   | 693_selected_genes |
| chr6  | 157524974 | 157525155 | ARID1B   | 693_selected_genes |
| chr6  | 157527275 | 157529050 | ARID1B   | 693_selected_genes |
| chr12 | 46123594  | 46123736  | ARID2    | 693_selected_genes |
| chr12 | 46123801  | 46123945  | ARID2    | 693_selected_genes |
| chr12 | 46124974  | 46125122  | ARID2    | 693_selected_genes |
| chr12 | 46149688  | 46149778  | ARID2    | 693_selected_genes |
| chr12 | 46169838  | 46169904  | ARID2    | 693_selected_genes |

|       |           |           |        |                    |
|-------|-----------|-----------|--------|--------------------|
| chr12 | 46205175  | 46205359  | ARID2  | 693_selected_genes |
| chr12 | 46211427  | 46211696  | ARID2  | 693_selected_genes |
| chr12 | 46215177  | 46215295  | ARID2  | 693_selected_genes |
| chr12 | 46230346  | 46230463  | ARID2  | 693_selected_genes |
| chr12 | 46230498  | 46230799  | ARID2  | 693_selected_genes |
| chr12 | 46231078  | 46231225  | ARID2  | 693_selected_genes |
| chr12 | 46231255  | 46231515  | ARID2  | 693_selected_genes |
| chr12 | 46233086  | 46233304  | ARID2  | 693_selected_genes |
| chr12 | 46240613  | 46240745  | ARID2  | 693_selected_genes |
| chr12 | 46242593  | 46242778  | ARID2  | 693_selected_genes |
| chr12 | 46243337  | 46243584  | ARID2  | 693_selected_genes |
| chr12 | 46243793  | 46246704  | ARID2  | 693_selected_genes |
| chr12 | 46254558  | 46254757  | ARID2  | 693_selected_genes |
| chr12 | 46285537  | 46285726  | ARID2  | 693_selected_genes |
| chr12 | 46285768  | 46285904  | ARID2  | 693_selected_genes |
| chr12 | 46287177  | 46287351  | ARID2  | 693_selected_genes |
| chr12 | 46287387  | 46287533  | ARID2  | 693_selected_genes |
| chr12 | 46298099  | 46298168  | ARID2  | 693_selected_genes |
| chr12 | 46298691  | 46298886  | ARID2  | 693_selected_genes |
| chr10 | 63661443  | 63661514  | ARID5B | 693_selected_genes |
| chr10 | 63661892  | 63662197  | ARID5B | 693_selected_genes |
| chr10 | 63699916  | 63700192  | ARID5B | 693_selected_genes |
| chr10 | 63759824  | 63760105  | ARID5B | 693_selected_genes |
| chr10 | 63809213  | 63809267  | ARID5B | 693_selected_genes |
| chr10 | 63810621  | 63810784  | ARID5B | 693_selected_genes |
| chr10 | 63816850  | 63817102  | ARID5B | 693_selected_genes |
| chr10 | 63818976  | 63819079  | ARID5B | 693_selected_genes |
| chr10 | 63829433  | 63829581  | ARID5B | 693_selected_genes |
| chr10 | 63845435  | 63845684  | ARID5B | 693_selected_genes |
| chr10 | 63850595  | 63852814  | ARID5B | 693_selected_genes |
| chr20 | 30946553  | 30946660  | ASXL1  | 693_selected_genes |
| chr20 | 30947524  | 30947619  | ASXL1  | 693_selected_genes |
| chr20 | 30954161  | 30954294  | ASXL1  | 693_selected_genes |
| chr20 | 30955504  | 30955557  | ASXL1  | 693_selected_genes |
| chr20 | 30956789  | 30956951  | ASXL1  | 693_selected_genes |
| chr20 | 30959555  | 30959611  | ASXL1  | 693_selected_genes |
| chr20 | 30959941  | 30959997  | ASXL1  | 693_selected_genes |
| chr20 | 31015905  | 31016076  | ASXL1  | 693_selected_genes |
| chr20 | 31016102  | 31016250  | ASXL1  | 693_selected_genes |
| chr20 | 31017115  | 31017259  | ASXL1  | 693_selected_genes |
| chr20 | 31017678  | 31017881  | ASXL1  | 693_selected_genes |
| chr20 | 31018920  | 31019004  | ASXL1  | 693_selected_genes |
| chr20 | 31019098  | 31019312  | ASXL1  | 693_selected_genes |
| chr20 | 31019360  | 31019507  | ASXL1  | 693_selected_genes |
| chr20 | 31020657  | 31020813  | ASXL1  | 693_selected_genes |
| chr20 | 31021061  | 31021745  | ASXL1  | 693_selected_genes |
| chr20 | 31022209  | 31025166  | ASXL1  | 693_selected_genes |
| chr2  | 25964872  | 25967370  | ASXL2  | 693_selected_genes |
| chr2  | 25972539  | 25973307  | ASXL2  | 693_selected_genes |
| chr2  | 25976377  | 25976533  | ASXL2  | 693_selected_genes |
| chr2  | 25978861  | 25979008  | ASXL2  | 693_selected_genes |
| chr2  | 25982325  | 25982539  | ASXL2  | 693_selected_genes |
| chr2  | 25990426  | 25990620  | ASXL2  | 693_selected_genes |
| chr2  | 25991585  | 25991762  | ASXL2  | 693_selected_genes |
| chr2  | 25994283  | 25994434  | ASXL2  | 693_selected_genes |
| chr2  | 26022228  | 26022429  | ASXL2  | 693_selected_genes |
| chr2  | 26029072  | 26029234  | ASXL2  | 693_selected_genes |
| chr2  | 26058381  | 26058434  | ASXL2  | 693_selected_genes |
| chr2  | 26068324  | 26068457  | ASXL2  | 693_selected_genes |
| chr2  | 26101009  | 26101116  | ASXL2  | 693_selected_genes |
| chr11 | 108098326 | 108098448 | ATM    | 693_selected_genes |
| chr11 | 108098477 | 108098640 | ATM    | 693_selected_genes |
| chr11 | 108099879 | 108100075 | ATM    | 693_selected_genes |
| chr11 | 108106371 | 108106586 | ATM    | 693_selected_genes |
| chr11 | 108114654 | 108114870 | ATM    | 693_selected_genes |
| chr11 | 108115489 | 108115778 | ATM    | 693_selected_genes |
| chr11 | 108117665 | 108117879 | ATM    | 693_selected_genes |
| chr11 | 108119634 | 108119854 | ATM    | 693_selected_genes |
| chr11 | 108121402 | 108121824 | ATM    | 693_selected_genes |
| chr11 | 108122538 | 108122783 | ATM    | 693_selected_genes |
| chr11 | 108123518 | 108123664 | ATM    | 693_selected_genes |
| chr11 | 108124515 | 108124791 | ATM    | 693_selected_genes |
| chr11 | 108126916 | 108127092 | ATM    | 693_selected_genes |
| chr11 | 108128182 | 108128358 | ATM    | 693_selected_genes |
| chr11 | 108129687 | 108129827 | ATM    | 693_selected_genes |
| chr11 | 108137872 | 108138094 | ATM    | 693_selected_genes |
| chr11 | 108139111 | 108139361 | ATM    | 693_selected_genes |
| chr11 | 108141765 | 108141898 | ATM    | 693_selected_genes |
| chr11 | 108141952 | 108142158 | ATM    | 693_selected_genes |
| chr11 | 108143233 | 108143359 | ATM    | 693_selected_genes |
| chr11 | 108143423 | 108143604 | ATM    | 693_selected_genes |
| chr11 | 108150192 | 108150360 | ATM    | 693_selected_genes |
| chr11 | 108151696 | 108151920 | ATM    | 693_selected_genes |
| chr11 | 108153411 | 108153631 | ATM    | 693_selected_genes |

|       |           |           |        |                    |
|-------|-----------|-----------|--------|--------------------|
| chr11 | 108154928 | 108155225 | ATM    | 693_selected_genes |
| chr11 | 108158301 | 108158467 | ATM    | 693_selected_genes |
| chr11 | 108159678 | 108159855 | ATM    | 693_selected_genes |
| chr11 | 108160303 | 108160553 | ATM    | 693_selected_genes |
| chr11 | 108163320 | 108163545 | ATM    | 693_selected_genes |
| chr11 | 108164014 | 108164229 | ATM    | 693_selected_genes |
| chr11 | 108165628 | 108165811 | ATM    | 693_selected_genes |
| chr11 | 108167988 | 108168134 | ATM    | 693_selected_genes |
| chr11 | 108170415 | 108170637 | ATM    | 693_selected_genes |
| chr11 | 108172349 | 108172541 | ATM    | 693_selected_genes |
| chr11 | 108173554 | 108173781 | ATM    | 693_selected_genes |
| chr11 | 108175376 | 108175604 | ATM    | 693_selected_genes |
| chr11 | 108178598 | 108178736 | ATM    | 693_selected_genes |
| chr11 | 108180861 | 108181067 | ATM    | 693_selected_genes |
| chr11 | 108183112 | 108183250 | ATM    | 693_selected_genes |
| chr11 | 108186524 | 108186663 | ATM    | 693_selected_genes |
| chr11 | 108186712 | 108186865 | ATM    | 693_selected_genes |
| chr11 | 108188074 | 108188273 | ATM    | 693_selected_genes |
| chr11 | 108190655 | 108190810 | ATM    | 693_selected_genes |
| chr11 | 108192002 | 108192172 | ATM    | 693_selected_genes |
| chr11 | 108196011 | 108196296 | ATM    | 693_selected_genes |
| chr11 | 108196759 | 108196977 | ATM    | 693_selected_genes |
| chr11 | 108198346 | 108198510 | ATM    | 693_selected_genes |
| chr11 | 108199722 | 108199990 | ATM    | 693_selected_genes |
| chr11 | 108200915 | 108201173 | ATM    | 693_selected_genes |
| chr11 | 108202145 | 108202309 | ATM    | 693_selected_genes |
| chr11 | 108202580 | 108202789 | ATM    | 693_selected_genes |
| chr11 | 108203463 | 108203652 | ATM    | 693_selected_genes |
| chr11 | 108204587 | 108204720 | ATM    | 693_selected_genes |
| chr11 | 108205670 | 108205861 | ATM    | 693_selected_genes |
| chr11 | 108206546 | 108206713 | ATM    | 693_selected_genes |
| chr11 | 108213923 | 108214123 | ATM    | 693_selected_genes |
| chr11 | 108216444 | 108216660 | ATM    | 693_selected_genes |
| chr11 | 108217980 | 108218117 | ATM    | 693_selected_genes |
| chr11 | 108224467 | 108224632 | ATM    | 693_selected_genes |
| chr11 | 108225512 | 108225626 | ATM    | 693_selected_genes |
| chr11 | 108235783 | 108235970 | ATM    | 693_selected_genes |
| chr11 | 108236026 | 108236260 | ATM    | 693_selected_genes |
| chr1  | 116916108 | 116916170 | ATP1A1 | 693_selected_genes |
| chr1  | 116916826 | 116916888 | ATP1A1 | 693_selected_genes |
| chr1  | 116926610 | 116926771 | ATP1A1 | 693_selected_genes |
| chr1  | 116927379 | 116927489 | ATP1A1 | 693_selected_genes |
| chr1  | 116929884 | 116930138 | ATP1A1 | 693_selected_genes |
| chr1  | 116930727 | 116930891 | ATP1A1 | 693_selected_genes |
| chr1  | 116931234 | 116931419 | ATP1A1 | 693_selected_genes |
| chr1  | 116931498 | 116931666 | ATP1A1 | 693_selected_genes |
| chr1  | 116932035 | 116932354 | ATP1A1 | 693_selected_genes |
| chr1  | 116932809 | 116933058 | ATP1A1 | 693_selected_genes |
| chr1  | 116933378 | 116933538 | ATP1A1 | 693_selected_genes |
| chr1  | 116935450 | 116935635 | ATP1A1 | 693_selected_genes |
| chr1  | 116936127 | 116936370 | ATP1A1 | 693_selected_genes |
| chr1  | 116937706 | 116937932 | ATP1A1 | 693_selected_genes |
| chr1  | 116939194 | 116939381 | ATP1A1 | 693_selected_genes |
| chr1  | 116940484 | 116940685 | ATP1A1 | 693_selected_genes |
| chr1  | 116941217 | 116941436 | ATP1A1 | 693_selected_genes |
| chr1  | 116941526 | 116941731 | ATP1A1 | 693_selected_genes |
| chr1  | 116942016 | 116942190 | ATP1A1 | 693_selected_genes |
| chr1  | 116943457 | 116943653 | ATP1A1 | 693_selected_genes |
| chr1  | 116943726 | 116943907 | ATP1A1 | 693_selected_genes |
| chr1  | 116944150 | 116944302 | ATP1A1 | 693_selected_genes |
| chr1  | 116946480 | 116946622 | ATP1A1 | 693_selected_genes |
| chr1  | 116947012 | 116947091 | ATP1A1 | 693_selected_genes |
| chr1  | 116952731 | 116952803 | ATP1A1 | 693_selected_genes |
| chr3  | 142168245 | 142168469 | ATR    | 693_selected_genes |
| chr3  | 142169349 | 142169469 | ATR    | 693_selected_genes |
| chr3  | 142171872 | 142172100 | ATR    | 693_selected_genes |
| chr3  | 142176420 | 142176622 | ATR    | 693_selected_genes |
| chr3  | 142177774 | 142177978 | ATR    | 693_selected_genes |
| chr3  | 142178043 | 142178250 | ATR    | 693_selected_genes |
| chr3  | 142180756 | 142180957 | ATR    | 693_selected_genes |
| chr3  | 142183913 | 142184107 | ATR    | 693_selected_genes |
| chr3  | 142185140 | 142185400 | ATR    | 693_selected_genes |
| chr3  | 142186750 | 142186935 | ATR    | 693_selected_genes |
| chr3  | 142188153 | 142188436 | ATR    | 693_selected_genes |
| chr3  | 142188902 | 142189050 | ATR    | 693_selected_genes |
| chr3  | 142203956 | 142204149 | ATR    | 693_selected_genes |
| chr3  | 142211948 | 142212178 | ATR    | 693_selected_genes |
| chr3  | 142215177 | 142215387 | ATR    | 693_selected_genes |
| chr3  | 142215829 | 142216059 | ATR    | 693_selected_genes |
| chr3  | 142217413 | 142217641 | ATR    | 693_selected_genes |
| chr3  | 142217946 | 142218059 | ATR    | 693_selected_genes |
| chr3  | 142218443 | 142218585 | ATR    | 693_selected_genes |
| chr3  | 142222178 | 142222320 | ATR    | 693_selected_genes |
| chr3  | 142223955 | 142224170 | ATR    | 693_selected_genes |

|       |           |           |       |                    |
|-------|-----------|-----------|-------|--------------------|
| chr3  | 142226747 | 142226976 | ATR   | 693_selected_genes |
| chr3  | 142231076 | 142231337 | ATR   | 693_selected_genes |
| chr3  | 142232317 | 142232505 | ATR   | 693_selected_genes |
| chr3  | 142234211 | 142234382 | ATR   | 693_selected_genes |
| chr3  | 142238485 | 142238651 | ATR   | 693_selected_genes |
| chr3  | 142241544 | 142241708 | ATR   | 693_selected_genes |
| chr3  | 142242809 | 142243066 | ATR   | 693_selected_genes |
| chr3  | 142253896 | 142254072 | ATR   | 693_selected_genes |
| chr3  | 142254924 | 142255068 | ATR   | 693_selected_genes |
| chr3  | 142257298 | 142257492 | ATR   | 693_selected_genes |
| chr3  | 142259720 | 142259901 | ATR   | 693_selected_genes |
| chr3  | 142261481 | 142261624 | ATR   | 693_selected_genes |
| chr3  | 142266541 | 142266777 | ATR   | 693_selected_genes |
| chr3  | 142268295 | 142268540 | ATR   | 693_selected_genes |
| chr3  | 142268948 | 142269169 | ATR   | 693_selected_genes |
| chr3  | 142272043 | 142272265 | ATR   | 693_selected_genes |
| chr3  | 142272456 | 142272607 | ATR   | 693_selected_genes |
| chr3  | 142272641 | 142272882 | ATR   | 693_selected_genes |
| chr3  | 142274693 | 142275006 | ATR   | 693_selected_genes |
| chr3  | 142275199 | 142275442 | ATR   | 693_selected_genes |
| chr3  | 142277440 | 142277643 | ATR   | 693_selected_genes |
| chr3  | 142278067 | 142278308 | ATR   | 693_selected_genes |
| chr3  | 142279079 | 142279321 | ATR   | 693_selected_genes |
| chr3  | 142280059 | 142280288 | ATR   | 693_selected_genes |
| chr3  | 142281048 | 142281976 | ATR   | 693_selected_genes |
| chr3  | 142284937 | 142285128 | ATR   | 693_selected_genes |
| chr3  | 142286879 | 142287021 | ATR   | 693_selected_genes |
| chr3  | 142297462 | 142297571 | ATR   | 693_selected_genes |
| chrX  | 76763803  | 76764132  | ATRX  | 693_selected_genes |
| chrX  | 76776240  | 76776419  | ATRX  | 693_selected_genes |
| chrX  | 76776855  | 76777001  | ATRX  | 693_selected_genes |
| chrX  | 76777715  | 76777891  | ATRX  | 693_selected_genes |
| chrX  | 76778704  | 76778904  | ATRX  | 693_selected_genes |
| chrX  | 76812896  | 76813141  | ATRX  | 693_selected_genes |
| chrX  | 76814114  | 76814342  | ATRX  | 693_selected_genes |
| chrX  | 76829689  | 76829848  | ATRX  | 693_selected_genes |
| chrX  | 76845278  | 76845435  | ATRX  | 693_selected_genes |
| chrX  | 76849140  | 76849344  | ATRX  | 693_selected_genes |
| chrX  | 76854854  | 76855074  | ATRX  | 693_selected_genes |
| chrX  | 76855175  | 76855314  | ATRX  | 693_selected_genes |
| chrX  | 76855877  | 76856058  | ATRX  | 693_selected_genes |
| chrX  | 76871904  | 76872004  | ATRX  | 693_selected_genes |
| chrX  | 76872055  | 76872223  | ATRX  | 693_selected_genes |
| chrX  | 76874248  | 76874474  | ATRX  | 693_selected_genes |
| chrX  | 76875837  | 76876025  | ATRX  | 693_selected_genes |
| chrX  | 76888669  | 76888897  | ATRX  | 693_selected_genes |
| chrX  | 76889028  | 76889225  | ATRX  | 693_selected_genes |
| chrX  | 76890059  | 76890219  | ATRX  | 693_selected_genes |
| chrX  | 76891380  | 76891572  | ATRX  | 693_selected_genes |
| chrX  | 76907578  | 76907868  | ATRX  | 693_selected_genes |
| chrX  | 76909562  | 76909715  | ATRX  | 693_selected_genes |
| chrX  | 76912024  | 76912168  | ATRX  | 693_selected_genes |
| chrX  | 76918845  | 76919072  | ATRX  | 693_selected_genes |
| chrX  | 76920108  | 76920292  | ATRX  | 693_selected_genes |
| chrX  | 76931695  | 76931818  | ATRX  | 693_selected_genes |
| chrX  | 76936986  | 76940110  | ATRX  | 693_selected_genes |
| chrX  | 76940405  | 76940523  | ATRX  | 693_selected_genes |
| chrX  | 76944285  | 76944445  | ATRX  | 693_selected_genes |
| chrX  | 76949273  | 76949451  | ATRX  | 693_selected_genes |
| chrX  | 76952039  | 76952217  | ATRX  | 693_selected_genes |
| chrX  | 76953045  | 76953148  | ATRX  | 693_selected_genes |
| chrX  | 76954036  | 76954142  | ATRX  | 693_selected_genes |
| chrX  | 76972582  | 76972745  | ATRX  | 693_selected_genes |
| chrX  | 77041442  | 77041512  | ATRX  | 693_selected_genes |
| chr20 | 54945188  | 54945421  | AURKA | 693_selected_genes |
| chr20 | 54945500  | 54945740  | AURKA | 693_selected_genes |
| chr20 | 54948438  | 54948637  | AURKA | 693_selected_genes |
| chr20 | 54956463  | 54956652  | AURKA | 693_selected_genes |
| chr20 | 54958015  | 54958257  | AURKA | 693_selected_genes |
| chr20 | 54959300  | 54959405  | AURKA | 693_selected_genes |
| chr20 | 54961287  | 54961614  | AURKA | 693_selected_genes |
| chr20 | 54963186  | 54963278  | AURKA | 693_selected_genes |
| chr17 | 8108163   | 8108387   | AURKB | 693_selected_genes |
| chr17 | 8108508   | 8108733   | AURKB | 693_selected_genes |
| chr17 | 8109783   | 8109982   | AURKB | 693_selected_genes |
| chr17 | 8110032   | 8110277   | AURKB | 693_selected_genes |
| chr17 | 8110468   | 8110713   | AURKB | 693_selected_genes |
| chr17 | 8110863   | 8110968   | AURKB | 693_selected_genes |
| chr17 | 8111030   | 8111183   | AURKB | 693_selected_genes |
| chr17 | 8113469   | 8113567   | AURKB | 693_selected_genes |
| chr16 | 338096    | 338331    | AXIN1 | 693_selected_genes |
| chr16 | 339414    | 339632    | AXIN1 | 693_selected_genes |
| chr16 | 341164    | 341322    | AXIN1 | 693_selected_genes |
| chr16 | 343462    | 343743    | AXIN1 | 693_selected_genes |

|       |           |           |         |                    |
|-------|-----------|-----------|---------|--------------------|
| chr16 | 347030    | 347251    | AXIN1   | 693_selected_genes |
| chr16 | 347696    | 348276    | AXIN1   | 693_selected_genes |
| chr16 | 354278    | 354466    | AXIN1   | 693_selected_genes |
| chr16 | 359947    | 360094    | AXIN1   | 693_selected_genes |
| chr16 | 364517    | 364708    | AXIN1   | 693_selected_genes |
| chr16 | 396122    | 397050    | AXIN1   | 693_selected_genes |
| chr17 | 63526068  | 63526245  | AXIN2   | 693_selected_genes |
| chr17 | 63530004  | 63530222  | AXIN2   | 693_selected_genes |
| chr17 | 63531718  | 63531864  | AXIN2   | 693_selected_genes |
| chr17 | 63532412  | 63532696  | AXIN2   | 693_selected_genes |
| chr17 | 63532961  | 63533206  | AXIN2   | 693_selected_genes |
| chr17 | 63533416  | 63533978  | AXIN2   | 693_selected_genes |
| chr17 | 63534295  | 63534486  | AXIN2   | 693_selected_genes |
| chr17 | 63537547  | 63537700  | AXIN2   | 693_selected_genes |
| chr17 | 63545612  | 63545803  | AXIN2   | 693_selected_genes |
| chr17 | 63553898  | 63554763  | AXIN2   | 693_selected_genes |
| chr19 | 41725272  | 41725407  | AXL     | 693_selected_genes |
| chr19 | 41726515  | 41726788  | AXL     | 693_selected_genes |
| chr19 | 41727025  | 41727176  | AXL     | 693_selected_genes |
| chr19 | 41727759  | 41727986  | AXL     | 693_selected_genes |
| chr19 | 41736846  | 41736977  | AXL     | 693_selected_genes |
| chr19 | 41737062  | 41737228  | AXL     | 693_selected_genes |
| chr19 | 41743823  | 41744084  | AXL     | 693_selected_genes |
| chr19 | 41744349  | 41744539  | AXL     | 693_selected_genes |
| chr19 | 41745043  | 41745244  | AXL     | 693_selected_genes |
| chr19 | 41745573  | 41745650  | AXL     | 693_selected_genes |
| chr19 | 41748762  | 41748945  | AXL     | 693_selected_genes |
| chr19 | 41749495  | 41749637  | AXL     | 693_selected_genes |
| chr19 | 41754393  | 41754539  | AXL     | 693_selected_genes |
| chr19 | 41754622  | 41754750  | AXL     | 693_selected_genes |
| chr19 | 41758230  | 41758373  | AXL     | 693_selected_genes |
| chr19 | 41758725  | 41758897  | AXL     | 693_selected_genes |
| chr19 | 41759478  | 41759638  | AXL     | 693_selected_genes |
| chr19 | 41762331  | 41762541  | AXL     | 693_selected_genes |
| chr19 | 41763372  | 41763559  | AXL     | 693_selected_genes |
| chr19 | 41765432  | 41765834  | AXL     | 693_selected_genes |
| chr15 | 45003719  | 45003836  | B2M     | 693_selected_genes |
| chr15 | 45007595  | 45007947  | B2M     | 693_selected_genes |
| chr15 | 45008501  | 45008565  | B2M     | 693_selected_genes |
| chr21 | 30693576  | 30693860  | BACH1   | 693_selected_genes |
| chr21 | 30698354  | 30699739  | BACH1   | 693_selected_genes |
| chr21 | 30701782  | 30702039  | BACH1   | 693_selected_genes |
| chr21 | 30714694  | 30715179  | BACH1   | 693_selected_genes |
| chr21 | 30954606  | 30954696  | BACH1   | 693_selected_genes |
| chr21 | 30969864  | 30970039  | BACH1   | 693_selected_genes |
| chr21 | 31002833  | 31002901  | BACH1   | 693_selected_genes |
| chr3  | 52436278  | 52436462  | BAP1    | 693_selected_genes |
| chr3  | 52436592  | 52436715  | BAP1    | 693_selected_genes |
| chr3  | 52436769  | 52436981  | BAP1    | 693_selected_genes |
| chr3  | 52437128  | 52437339  | BAP1    | 693_selected_genes |
| chr3  | 52437406  | 52437935  | BAP1    | 693_selected_genes |
| chr3  | 52438443  | 52438627  | BAP1    | 693_selected_genes |
| chr3  | 52439100  | 52439335  | BAP1    | 693_selected_genes |
| chr3  | 52439755  | 52439953  | BAP1    | 693_selected_genes |
| chr3  | 52440243  | 52440417  | BAP1    | 693_selected_genes |
| chr3  | 52440819  | 52440948  | BAP1    | 693_selected_genes |
| chr3  | 52441164  | 52441357  | BAP1    | 693_selected_genes |
| chr3  | 52441389  | 52441501  | BAP1    | 693_selected_genes |
| chr3  | 52441948  | 52442118  | BAP1    | 693_selected_genes |
| chr3  | 52442464  | 52442647  | BAP1    | 693_selected_genes |
| chr3  | 52443544  | 52443649  | BAP1    | 693_selected_genes |
| chr3  | 52443704  | 52443784  | BAP1    | 693_selected_genes |
| chr3  | 52443832  | 52443919  | BAP1    | 693_selected_genes |
| chr2  | 215593374 | 215593757 | BARD1   | 693_selected_genes |
| chr2  | 215595109 | 215595257 | BARD1   | 693_selected_genes |
| chr2  | 215595606 | 215595672 | BARD1   | 693_selected_genes |
| chr2  | 215609765 | 215609908 | BARD1   | 693_selected_genes |
| chr2  | 215610420 | 215610603 | BARD1   | 693_selected_genes |
| chr2  | 215617145 | 215617304 | BARD1   | 693_selected_genes |
| chr2  | 215632180 | 215632403 | BARD1   | 693_selected_genes |
| chr2  | 215633930 | 215634061 | BARD1   | 693_selected_genes |
| chr2  | 215645258 | 215646258 | BARD1   | 693_selected_genes |
| chr2  | 215656995 | 215657194 | BARD1   | 693_selected_genes |
| chr2  | 215661759 | 215661866 | BARD1   | 693_selected_genes |
| chr2  | 215674110 | 215674318 | BARD1   | 693_selected_genes |
| chr19 | 47724932  | 47725200  | BBC3    | 693_selected_genes |
| chr19 | 47729795  | 47730036  | BBC3    | 693_selected_genes |
| chr19 | 47731389  | 47731728  | BBC3    | 693_selected_genes |
| chr19 | 47735746  | 47735884  | BBC3    | 693_selected_genes |
| chr18 | 60795832  | 60796017  | BCL2    | 693_selected_genes |
| chr18 | 60985256  | 60985924  | BCL2    | 693_selected_genes |
| chr20 | 30253726  | 30253914  | BCL2L1  | 693_selected_genes |
| chr20 | 30309432  | 30310046  | BCL2L1  | 693_selected_genes |
| chr2  | 111881297 | 111881741 | BCL2L11 | 693_selected_genes |

|       |           |           |         |                    |
|-------|-----------|-----------|---------|--------------------|
| chr2  | 111881869 | 111882023 | BCL2L11 | 693_selected_genes |
| chr2  | 111886178 | 111886353 | BCL2L11 | 693_selected_genes |
| chr2  | 111887683 | 111887837 | BCL2L11 | 693_selected_genes |
| chr2  | 111899864 | 111899993 | BCL2L11 | 693_selected_genes |
| chr2  | 111902039 | 111902103 | BCL2L11 | 693_selected_genes |
| chr2  | 111907595 | 111907749 | BCL2L11 | 693_selected_genes |
| chr2  | 111909373 | 111909453 | BCL2L11 | 693_selected_genes |
| chr2  | 111911331 | 111911410 | BCL2L11 | 693_selected_genes |
| chr2  | 111918970 | 111919041 | BCL2L11 | 693_selected_genes |
| chr2  | 111921684 | 111921833 | BCL2L11 | 693_selected_genes |
| chr14 | 23776951  | 23777433  | BCL2L2  | 693_selected_genes |
| chr14 | 23777999  | 23778199  | BCL2L2  | 693_selected_genes |
| chr14 | 23780156  | 23780332  | BCL2L2  | 693_selected_genes |
| chr3  | 187440220 | 187440414 | BCL6    | 693_selected_genes |
| chr3  | 187442703 | 187442891 | BCL6    | 693_selected_genes |
| chr3  | 187443261 | 187443442 | BCL6    | 693_selected_genes |
| chr3  | 187444493 | 187444711 | BCL6    | 693_selected_genes |
| chr3  | 187446122 | 187446357 | BCL6    | 693_selected_genes |
| chr3  | 187446812 | 187447834 | BCL6    | 693_selected_genes |
| chr3  | 187449471 | 187449743 | BCL6    | 693_selected_genes |
| chr3  | 187451295 | 187451506 | BCL6    | 693_selected_genes |
| chr6  | 136582222 | 136582278 | BCLAF1  | 693_selected_genes |
| chr6  | 136582377 | 136582640 | BCLAF1  | 693_selected_genes |
| chr6  | 136588141 | 136588338 | BCLAF1  | 693_selected_genes |
| chr6  | 136589274 | 136589502 | BCLAF1  | 693_selected_genes |
| chr6  | 136590376 | 136590466 | BCLAF1  | 693_selected_genes |
| chr6  | 136590549 | 136590775 | BCLAF1  | 693_selected_genes |
| chr6  | 136593107 | 136593242 | BCLAF1  | 693_selected_genes |
| chr6  | 136594194 | 136594350 | BCLAF1  | 693_selected_genes |
| chr6  | 136595225 | 136595352 | BCLAF1  | 693_selected_genes |
| chr6  | 136596644 | 136596864 | BCLAF1  | 693_selected_genes |
| chr6  | 136596955 | 136597671 | BCLAF1  | 693_selected_genes |
| chr6  | 136598977 | 136599939 | BCLAF1  | 693_selected_genes |
| chr6  | 136600875 | 136601029 | BCLAF1  | 693_selected_genes |
| chrX  | 39909143  | 39909269  | BCOR    | 693_selected_genes |
| chrX  | 39911336  | 39911678  | BCOR    | 693_selected_genes |
| chrX  | 39913109  | 39913320  | BCOR    | 693_selected_genes |
| chrX  | 39913483  | 39913611  | BCOR    | 693_selected_genes |
| chrX  | 39914595  | 39914791  | BCOR    | 693_selected_genes |
| chrX  | 39916382  | 39916599  | BCOR    | 693_selected_genes |
| chrX  | 39921366  | 39921671  | BCOR    | 693_selected_genes |
| chrX  | 39921973  | 39922349  | BCOR    | 693_selected_genes |
| chrX  | 39922835  | 39923230  | BCOR    | 693_selected_genes |
| chrX  | 39923563  | 39923877  | BCOR    | 693_selected_genes |
| chrX  | 39930200  | 39930437  | BCOR    | 693_selected_genes |
| chrX  | 39930864  | 39930968  | BCOR    | 693_selected_genes |
| chrX  | 39931576  | 39934458  | BCOR    | 693_selected_genes |
| chrX  | 39935681  | 39935810  | BCOR    | 693_selected_genes |
| chrX  | 39937071  | 39937207  | BCOR    | 693_selected_genes |
| chrX  | 129139182 | 129139318 | BCORL1  | 693_selected_genes |
| chrX  | 129144458 | 129144560 | BCORL1  | 693_selected_genes |
| chrX  | 129146528 | 129146669 | BCORL1  | 693_selected_genes |
| chrX  | 129146900 | 129150214 | BCORL1  | 693_selected_genes |
| chrX  | 129154934 | 129155150 | BCORL1  | 693_selected_genes |
| chrX  | 129156846 | 129156977 | BCORL1  | 693_selected_genes |
| chrX  | 129158939 | 129159379 | BCORL1  | 693_selected_genes |
| chrX  | 129162584 | 129162861 | BCORL1  | 693_selected_genes |
| chrX  | 129168404 | 129168676 | BCORL1  | 693_selected_genes |
| chrX  | 129171316 | 129171533 | BCORL1  | 693_selected_genes |
| chrX  | 129173086 | 129173282 | BCORL1  | 693_selected_genes |
| chrX  | 129184666 | 129184794 | BCORL1  | 693_selected_genes |
| chrX  | 129185809 | 129186016 | BCORL1  | 693_selected_genes |
| chrX  | 129189803 | 129190136 | BCORL1  | 693_selected_genes |
| chr22 | 23523122  | 23524451  | BCR     | 693_selected_genes |
| chr22 | 23584979  | 23585154  | BCR     | 693_selected_genes |
| chr22 | 23595960  | 23596192  | BCR     | 693_selected_genes |
| chr22 | 23603111  | 23603266  | BCR     | 693_selected_genes |
| chr22 | 23603516  | 23603752  | BCR     | 693_selected_genes |
| chr22 | 23610569  | 23610727  | BCR     | 693_selected_genes |
| chr22 | 23613693  | 23613804  | BCR     | 693_selected_genes |
| chr22 | 23615242  | 23615345  | BCR     | 693_selected_genes |
| chr22 | 23615795  | 23615986  | BCR     | 693_selected_genes |
| chr22 | 23626138  | 23626310  | BCR     | 693_selected_genes |
| chr22 | 23627194  | 23627413  | BCR     | 693_selected_genes |
| chr22 | 23629320  | 23629490  | BCR     | 693_selected_genes |
| chr22 | 23630258  | 23630384  | BCR     | 693_selected_genes |
| chr22 | 23631678  | 23631833  | BCR     | 693_selected_genes |
| chr22 | 23632500  | 23632625  | BCR     | 693_selected_genes |
| chr22 | 23634702  | 23634850  | BCR     | 693_selected_genes |
| chr22 | 23637185  | 23637367  | BCR     | 693_selected_genes |
| chr22 | 23651585  | 23651695  | BCR     | 693_selected_genes |
| chr22 | 23652485  | 23652645  | BCR     | 693_selected_genes |
| chr22 | 23653858  | 23654048  | BCR     | 693_selected_genes |
| chr22 | 23655048  | 23655233  | BCR     | 693_selected_genes |

|       |           |           |        |                    |
|-------|-----------|-----------|--------|--------------------|
| chr22 | 23656129  | 23656285  | BCR    | 693_selected_genes |
| chr22 | 23656713  | 23656926  | BCR    | 693_selected_genes |
| chr22 | 23657594  | 23657734  | BCR    | 693_selected_genes |
| chr15 | 91290597  | 91290745  | BLM    | 693_selected_genes |
| chr15 | 91292571  | 91293322  | BLM    | 693_selected_genes |
| chr15 | 91294991  | 91295201  | BLM    | 693_selected_genes |
| chr15 | 91298015  | 91298193  | BLM    | 693_selected_genes |
| chr15 | 91303185  | 91303534  | BLM    | 693_selected_genes |
| chr15 | 91303798  | 91304510  | BLM    | 693_selected_genes |
| chr15 | 91306170  | 91306412  | BLM    | 693_selected_genes |
| chr15 | 91308500  | 91308669  | BLM    | 693_selected_genes |
| chr15 | 91310114  | 91310278  | BLM    | 693_selected_genes |
| chr15 | 91312337  | 91312486  | BLM    | 693_selected_genes |
| chr15 | 91312642  | 91312841  | BLM    | 693_selected_genes |
| chr15 | 91326026  | 91326183  | BLM    | 693_selected_genes |
| chr15 | 91328125  | 91328336  | BLM    | 693_selected_genes |
| chr15 | 91333853  | 91334099  | BLM    | 693_selected_genes |
| chr15 | 91337371  | 91337612  | BLM    | 693_selected_genes |
| chr15 | 91341394  | 91341592  | BLM    | 693_selected_genes |
| chr15 | 91346725  | 91346975  | BLM    | 693_selected_genes |
| chr15 | 91347371  | 91347614  | BLM    | 693_selected_genes |
| chr15 | 91352341  | 91352514  | BLM    | 693_selected_genes |
| chr15 | 91354409  | 91354661  | BLM    | 693_selected_genes |
| chr15 | 91358306  | 91358534  | BLM    | 693_selected_genes |
| chr10 | 88635750  | 88635867  | BMPR1A | 693_selected_genes |
| chr10 | 88649793  | 88650006  | BMPR1A | 693_selected_genes |
| chr10 | 88651858  | 88652011  | BMPR1A | 693_selected_genes |
| chr10 | 88659525  | 88659672  | BMPR1A | 693_selected_genes |
| chr10 | 88659758  | 88659908  | BMPR1A | 693_selected_genes |
| chr10 | 88671971  | 88672166  | BMPR1A | 693_selected_genes |
| chr10 | 88676865  | 88677108  | BMPR1A | 693_selected_genes |
| chr10 | 88678903  | 88679251  | BMPR1A | 693_selected_genes |
| chr10 | 88681251  | 88681477  | BMPR1A | 693_selected_genes |
| chr10 | 88683107  | 88683288  | BMPR1A | 693_selected_genes |
| chr10 | 88683325  | 88683501  | BMPR1A | 693_selected_genes |
| chr7  | 140426268 | 140426341 | BRAF   | 693_selected_genes |
| chr7  | 140434371 | 140434595 | BRAF   | 693_selected_genes |
| chr7  | 140439586 | 140439771 | BRAF   | 693_selected_genes |
| chr7  | 140447189 | 140447272 | BRAF   | 693_selected_genes |
| chr7  | 140449061 | 140449243 | BRAF   | 693_selected_genes |
| chr7  | 140453049 | 140453218 | BRAF   | 693_selected_genes |
| chr7  | 140453961 | 140454058 | BRAF   | 693_selected_genes |
| chr7  | 140476686 | 140476913 | BRAF   | 693_selected_genes |
| chr7  | 140477765 | 140477900 | BRAF   | 693_selected_genes |
| chr7  | 140481350 | 140481518 | BRAF   | 693_selected_genes |
| chr7  | 140482795 | 140482982 | BRAF   | 693_selected_genes |
| chr7  | 140487322 | 140487409 | BRAF   | 693_selected_genes |
| chr7  | 140494082 | 140494292 | BRAF   | 693_selected_genes |
| chr7  | 140500136 | 140500306 | BRAF   | 693_selected_genes |
| chr7  | 140501186 | 140501385 | BRAF   | 693_selected_genes |
| chr7  | 140507734 | 140507887 | BRAF   | 693_selected_genes |
| chr7  | 140508069 | 140508141 | BRAF   | 693_selected_genes |
| chr7  | 140508666 | 140508820 | BRAF   | 693_selected_genes |
| chr7  | 140534383 | 140534697 | BRAF   | 693_selected_genes |
| chr7  | 140549885 | 140550037 | BRAF   | 693_selected_genes |
| chr7  | 140624340 | 140624528 | BRAF   | 693_selected_genes |
| chr17 | 41197669  | 41197844  | BRCA1  | 693_selected_genes |
| chr17 | 41199634  | 41199745  | BRCA1  | 693_selected_genes |
| chr17 | 41201112  | 41201236  | BRCA1  | 693_selected_genes |
| chr17 | 41202053  | 41202134  | BRCA1  | 693_selected_genes |
| chr17 | 41203054  | 41203159  | BRCA1  | 693_selected_genes |
| chr17 | 41209043  | 41209177  | BRCA1  | 693_selected_genes |
| chr17 | 41215324  | 41215415  | BRCA1  | 693_selected_genes |
| chr17 | 41215865  | 41215993  | BRCA1  | 693_selected_genes |
| chr17 | 41219599  | 41219737  | BRCA1  | 693_selected_genes |
| chr17 | 41222919  | 41223280  | BRCA1  | 693_selected_genes |
| chr17 | 41226322  | 41226563  | BRCA1  | 693_selected_genes |
| chr17 | 41228479  | 41228656  | BRCA1  | 693_selected_genes |
| chr17 | 41231325  | 41231441  | BRCA1  | 693_selected_genes |
| chr17 | 41234395  | 41234617  | BRCA1  | 693_selected_genes |
| chr17 | 41242935  | 41243074  | BRCA1  | 693_selected_genes |
| chr17 | 41243426  | 41246902  | BRCA1  | 693_selected_genes |
| chr17 | 41247837  | 41247964  | BRCA1  | 693_selected_genes |
| chr17 | 41249235  | 41249331  | BRCA1  | 693_selected_genes |
| chr17 | 41251766  | 41251922  | BRCA1  | 693_selected_genes |
| chr17 | 41256113  | 41256303  | BRCA1  | 693_selected_genes |
| chr17 | 41256859  | 41256998  | BRCA1  | 693_selected_genes |
| chr17 | 41258447  | 41258575  | BRCA1  | 693_selected_genes |
| chr17 | 41262526  | 41262622  | BRCA1  | 693_selected_genes |
| chr17 | 41267717  | 41267821  | BRCA1  | 693_selected_genes |
| chr17 | 41276008  | 41276138  | BRCA1  | 693_selected_genes |
| chr17 | 41277173  | 41277227  | BRCA1  | 693_selected_genes |
| chr13 | 32890572  | 32890689  | BRCA2  | 693_selected_genes |
| chr13 | 32893188  | 32893487  | BRCA2  | 693_selected_genes |

|       |           |           |       |                    |
|-------|-----------|-----------|-------|--------------------|
| chr13 | 32899187  | 32899346  | BRCA2 | 693_selected_genes |
| chr13 | 32900212  | 32900312  | BRCA2 | 693_selected_genes |
| chr13 | 32900353  | 32900444  | BRCA2 | 693_selected_genes |
| chr13 | 32900610  | 32900775  | BRCA2 | 693_selected_genes |
| chr13 | 32903554  | 32903654  | BRCA2 | 693_selected_genes |
| chr13 | 32905030  | 32905192  | BRCA2 | 693_selected_genes |
| chr13 | 32906383  | 32907549  | BRCA2 | 693_selected_genes |
| chr13 | 32910376  | 32915358  | BRCA2 | 693_selected_genes |
| chr13 | 32918669  | 32918815  | BRCA2 | 693_selected_genes |
| chr13 | 32920938  | 32921058  | BRCA2 | 693_selected_genes |
| chr13 | 32928972  | 32929450  | BRCA2 | 693_selected_genes |
| chr13 | 32930539  | 32930771  | BRCA2 | 693_selected_genes |
| chr13 | 32931853  | 32932091  | BRCA2 | 693_selected_genes |
| chr13 | 32936634  | 32936855  | BRCA2 | 693_selected_genes |
| chr13 | 32937290  | 32937695  | BRCA2 | 693_selected_genes |
| chr13 | 32944513  | 32944719  | BRCA2 | 693_selected_genes |
| chr13 | 32945067  | 32945262  | BRCA2 | 693_selected_genes |
| chr13 | 32949454  | 32949568  | BRCA2 | 693_selected_genes |
| chr13 | 32950781  | 32950953  | BRCA2 | 693_selected_genes |
| chr13 | 32953428  | 32953677  | BRCA2 | 693_selected_genes |
| chr13 | 32953861  | 32954075  | BRCA2 | 693_selected_genes |
| chr13 | 32954118  | 32954307  | BRCA2 | 693_selected_genes |
| chr13 | 32968800  | 32969095  | BRCA2 | 693_selected_genes |
| chr13 | 32970102  | 32970254  | BRCA2 | 693_selected_genes |
| chr13 | 32971009  | 32971206  | BRCA2 | 693_selected_genes |
| chr13 | 32972273  | 32972932  | BRCA2 | 693_selected_genes |
| chr19 | 15349162  | 15349281  | BRD4  | 693_selected_genes |
| chr19 | 15349528  | 15349816  | BRD4  | 693_selected_genes |
| chr19 | 15349844  | 15350100  | BRD4  | 693_selected_genes |
| chr19 | 15350177  | 15350358  | BRD4  | 693_selected_genes |
| chr19 | 15350444  | 15350657  | BRD4  | 693_selected_genes |
| chr19 | 15350695  | 15350858  | BRD4  | 693_selected_genes |
| chr19 | 15353685  | 15354323  | BRD4  | 693_selected_genes |
| chr19 | 15355016  | 15355436  | BRD4  | 693_selected_genes |
| chr19 | 15355495  | 15355598  | BRD4  | 693_selected_genes |
| chr19 | 15360065  | 15360126  | BRD4  | 693_selected_genes |
| chr19 | 15364342  | 15364619  | BRD4  | 693_selected_genes |
| chr19 | 15364937  | 15365098  | BRD4  | 693_selected_genes |
| chr19 | 15366082  | 15366428  | BRD4  | 693_selected_genes |
| chr19 | 15366849  | 15367099  | BRD4  | 693_selected_genes |
| chr19 | 15367749  | 15368009  | BRD4  | 693_selected_genes |
| chr19 | 15374205  | 15374384  | BRD4  | 693_selected_genes |
| chr19 | 15375189  | 15375602  | BRD4  | 693_selected_genes |
| chr19 | 15376139  | 15376479  | BRD4  | 693_selected_genes |
| chr19 | 15378201  | 15378387  | BRD4  | 693_selected_genes |
| chr19 | 15379049  | 15379117  | BRD4  | 693_selected_genes |
| chr19 | 15379690  | 15379878  | BRD4  | 693_selected_genes |
| chr19 | 15383600  | 15383935  | BRD4  | 693_selected_genes |
| chr17 | 59760631  | 59761526  | BRIP1 | 693_selected_genes |
| chr17 | 59763091  | 59763551  | BRIP1 | 693_selected_genes |
| chr17 | 59770765  | 59770898  | BRIP1 | 693_selected_genes |
| chr17 | 59793286  | 59793449  | BRIP1 | 693_selected_genes |
| chr17 | 59816566  | 59816796  | BRIP1 | 693_selected_genes |
| chr17 | 59820348  | 59820520  | BRIP1 | 693_selected_genes |
| chr17 | 59821767  | 59821977  | BRIP1 | 693_selected_genes |
| chr17 | 59853736  | 59853948  | BRIP1 | 693_selected_genes |
| chr17 | 59857596  | 59857787  | BRIP1 | 693_selected_genes |
| chr17 | 59858175  | 59858391  | BRIP1 | 693_selected_genes |
| chr17 | 59861221  | 59861293  | BRIP1 | 693_selected_genes |
| chr17 | 59861605  | 59861810  | BRIP1 | 693_selected_genes |
| chr17 | 59870932  | 59871115  | BRIP1 | 693_selected_genes |
| chr17 | 59876435  | 59876685  | BRIP1 | 693_selected_genes |
| chr17 | 59878588  | 59878860  | BRIP1 | 693_selected_genes |
| chr17 | 59885802  | 59886143  | BRIP1 | 693_selected_genes |
| chr17 | 59924436  | 59924606  | BRIP1 | 693_selected_genes |
| chr17 | 59926464  | 59926642  | BRIP1 | 693_selected_genes |
| chr17 | 59934393  | 59934617  | BRIP1 | 693_selected_genes |
| chr17 | 59937131  | 59937293  | BRIP1 | 693_selected_genes |
| chr17 | 59938782  | 59938925  | BRIP1 | 693_selected_genes |
| chr12 | 92537830  | 92538248  | BTG1  | 693_selected_genes |
| chr12 | 92539138  | 92539336  | BTG1  | 693_selected_genes |
| chrX  | 100604847 | 100604969 | BTK   | 693_selected_genes |
| chrX  | 100608156 | 100608364 | BTK   | 693_selected_genes |
| chrX  | 100608832 | 100609001 | BTK   | 693_selected_genes |
| chrX  | 100609592 | 100609707 | BTK   | 693_selected_genes |
| chrX  | 100611014 | 100611281 | BTK   | 693_selected_genes |
| chrX  | 100611746 | 100611968 | BTK   | 693_selected_genes |
| chrX  | 100612471 | 100612596 | BTK   | 693_selected_genes |
| chrX  | 100613272 | 100613450 | BTK   | 693_selected_genes |
| chrX  | 100613579 | 100613709 | BTK   | 693_selected_genes |
| chrX  | 100614255 | 100614360 | BTK   | 693_selected_genes |
| chrX  | 100615050 | 100615163 | BTK   | 693_selected_genes |
| chrX  | 100615530 | 100615768 | BTK   | 693_selected_genes |
| chrX  | 100617135 | 100617253 | BTK   | 693_selected_genes |

|       |           |           |        |                    |
|-------|-----------|-----------|--------|--------------------|
| chrX  | 100617523 | 100617702 | BTK    | 693_selected_genes |
| chrX  | 100624960 | 100625092 | BTK    | 693_selected_genes |
| chrX  | 100626595 | 100626714 | BTK    | 693_selected_genes |
| chrX  | 100629498 | 100629647 | BTK    | 693_selected_genes |
| chrX  | 100630106 | 100630327 | BTK    | 693_selected_genes |
| chrX  | 100645440 | 100645562 | BTK    | 693_selected_genes |
| chr15 | 40453396  | 40453481  | BUB1B  | 693_selected_genes |
| chr15 | 40457228  | 40457422  | BUB1B  | 693_selected_genes |
| chr15 | 40458534  | 40458696  | BUB1B  | 693_selected_genes |
| chr15 | 40462237  | 40462389  | BUB1B  | 693_selected_genes |
| chr15 | 40462712  | 40462907  | BUB1B  | 693_selected_genes |
| chr15 | 40468652  | 40468899  | BUB1B  | 693_selected_genes |
| chr15 | 40475889  | 40476109  | BUB1B  | 693_selected_genes |
| chr15 | 40477340  | 40477605  | BUB1B  | 693_selected_genes |
| chr15 | 40477726  | 40477868  | BUB1B  | 693_selected_genes |
| chr15 | 40488720  | 40489000  | BUB1B  | 693_selected_genes |
| chr15 | 40491790  | 40491953  | BUB1B  | 693_selected_genes |
| chr15 | 40492419  | 40492585  | BUB1B  | 693_selected_genes |
| chr15 | 40493106  | 40493206  | BUB1B  | 693_selected_genes |
| chr15 | 40494580  | 40494691  | BUB1B  | 693_selected_genes |
| chr15 | 40494764  | 40494920  | BUB1B  | 693_selected_genes |
| chr15 | 40498359  | 40498684  | BUB1B  | 693_selected_genes |
| chr15 | 40500812  | 40500996  | BUB1B  | 693_selected_genes |
| chr15 | 40501810  | 40502001  | BUB1B  | 693_selected_genes |
| chr15 | 40502285  | 40502436  | BUB1B  | 693_selected_genes |
| chr15 | 40504674  | 40504874  | BUB1B  | 693_selected_genes |
| chr15 | 40505507  | 40505700  | BUB1B  | 693_selected_genes |
| chr15 | 40509671  | 40509893  | BUB1B  | 693_selected_genes |
| chr15 | 40510631  | 40510788  | BUB1B  | 693_selected_genes |
| chr15 | 40512739  | 40512985  | BUB1B  | 693_selected_genes |
| chr2  | 27440394  | 27440526  | CAD    | 693_selected_genes |
| chr2  | 27440719  | 27440909  | CAD    | 693_selected_genes |
| chr2  | 27444060  | 27444240  | CAD    | 693_selected_genes |
| chr2  | 27445036  | 27445229  | CAD    | 693_selected_genes |
| chr2  | 27445361  | 27445553  | CAD    | 693_selected_genes |
| chr2  | 27445708  | 27445930  | CAD    | 693_selected_genes |
| chr2  | 27446405  | 27446641  | CAD    | 693_selected_genes |
| chr2  | 27446759  | 27446922  | CAD    | 693_selected_genes |
| chr2  | 27447187  | 27447383  | CAD    | 693_selected_genes |
| chr2  | 27447587  | 27447769  | CAD    | 693_selected_genes |
| chr2  | 27447852  | 27448136  | CAD    | 693_selected_genes |
| chr2  | 27448547  | 27448819  | CAD    | 693_selected_genes |
| chr2  | 27448973  | 27449212  | CAD    | 693_selected_genes |
| chr2  | 27449367  | 27449542  | CAD    | 693_selected_genes |
| chr2  | 27449674  | 27449855  | CAD    | 693_selected_genes |
| chr2  | 27454310  | 27454473  | CAD    | 693_selected_genes |
| chr2  | 27454822  | 27455117  | CAD    | 693_selected_genes |
| chr2  | 27455290  | 27455587  | CAD    | 693_selected_genes |
| chr2  | 27455884  | 27456033  | CAD    | 693_selected_genes |
| chr2  | 27456154  | 27456429  | CAD    | 693_selected_genes |
| chr2  | 27456468  | 27456701  | CAD    | 693_selected_genes |
| chr2  | 27456850  | 27457119  | CAD    | 693_selected_genes |
| chr2  | 27457360  | 27457578  | CAD    | 693_selected_genes |
| chr2  | 27458087  | 27458320  | CAD    | 693_selected_genes |
| chr2  | 27458378  | 27458533  | CAD    | 693_selected_genes |
| chr2  | 27459126  | 27459416  | CAD    | 693_selected_genes |
| chr2  | 27459570  | 27459723  | CAD    | 693_selected_genes |
| chr2  | 27460221  | 27460438  | CAD    | 693_selected_genes |
| chr2  | 27460560  | 27460775  | CAD    | 693_selected_genes |
| chr2  | 27460898  | 27461080  | CAD    | 693_selected_genes |
| chr2  | 27461273  | 27461525  | CAD    | 693_selected_genes |
| chr2  | 27461884  | 27462125  | CAD    | 693_selected_genes |
| chr2  | 27462173  | 27462364  | CAD    | 693_selected_genes |
| chr2  | 27462539  | 27462691  | CAD    | 693_selected_genes |
| chr2  | 27463107  | 27463254  | CAD    | 693_selected_genes |
| chr2  | 27463409  | 27463510  | CAD    | 693_selected_genes |
| chr2  | 27463753  | 27463848  | CAD    | 693_selected_genes |
| chr2  | 27463900  | 27464120  | CAD    | 693_selected_genes |
| chr2  | 27464164  | 27464289  | CAD    | 693_selected_genes |
| chr2  | 27464753  | 27465016  | CAD    | 693_selected_genes |
| chr2  | 27465144  | 27465320  | CAD    | 693_selected_genes |
| chr2  | 27465462  | 27465866  | CAD    | 693_selected_genes |
| chr2  | 27466040  | 27466185  | CAD    | 693_selected_genes |
| chr2  | 27466258  | 27466411  | CAD    | 693_selected_genes |
| chr7  | 2946246   | 2946501   | CARD11 | 693_selected_genes |
| chr7  | 2949658   | 2949824   | CARD11 | 693_selected_genes |
| chr7  | 2951780   | 2951955   | CARD11 | 693_selected_genes |
| chr7  | 2952895   | 2953125   | CARD11 | 693_selected_genes |
| chr7  | 2954845   | 2955031   | CARD11 | 693_selected_genes |
| chr7  | 2956898   | 2957044   | CARD11 | 693_selected_genes |
| chr7  | 2958099   | 2958246   | CARD11 | 693_selected_genes |
| chr7  | 2958980   | 2959271   | CARD11 | 693_selected_genes |
| chr7  | 2962242   | 2962419   | CARD11 | 693_selected_genes |
| chr7  | 2962740   | 2962992   | CARD11 | 693_selected_genes |

|       |           |           |        |                    |
|-------|-----------|-----------|--------|--------------------|
| chr7  | 2963841   | 2964024   | CARD11 | 693_selected_genes |
| chr7  | 2966347   | 2966450   | CARD11 | 693_selected_genes |
| chr7  | 2968206   | 2968357   | CARD11 | 693_selected_genes |
| chr7  | 2969600   | 2969733   | CARD11 | 693_selected_genes |
| chr7  | 2972143   | 2972245   | CARD11 | 693_selected_genes |
| chr7  | 2974061   | 2974288   | CARD11 | 693_selected_genes |
| chr7  | 2976645   | 2976893   | CARD11 | 693_selected_genes |
| chr7  | 2977515   | 2977691   | CARD11 | 693_selected_genes |
| chr7  | 2978287   | 2978490   | CARD11 | 693_selected_genes |
| chr7  | 2979357   | 2979587   | CARD11 | 693_selected_genes |
| chr7  | 2983820   | 2984196   | CARD11 | 693_selected_genes |
| chr7  | 2985427   | 2985615   | CARD11 | 693_selected_genes |
| chr7  | 2987183   | 2987446   | CARD11 | 693_selected_genes |
| chr7  | 2998108   | 2998165   | CARD11 | 693_selected_genes |
| chr19 | 10982353  | 10982623  | CARM1  | 693_selected_genes |
| chr19 | 11015601  | 11015777  | CARM1  | 693_selected_genes |
| chr19 | 11018689  | 11018846  | CARM1  | 693_selected_genes |
| chr19 | 11019200  | 11019283  | CARM1  | 693_selected_genes |
| chr19 | 11019753  | 11019908  | CARM1  | 693_selected_genes |
| chr19 | 11022834  | 11022995  | CARM1  | 693_selected_genes |
| chr19 | 11024527  | 11024755  | CARM1  | 693_selected_genes |
| chr19 | 11027057  | 11027198  | CARM1  | 693_selected_genes |
| chr19 | 11027346  | 11027478  | CARM1  | 693_selected_genes |
| chr19 | 11030245  | 11030381  | CARM1  | 693_selected_genes |
| chr19 | 11030483  | 11030667  | CARM1  | 693_selected_genes |
| chr19 | 11031086  | 11031274  | CARM1  | 693_selected_genes |
| chr19 | 11031309  | 11031449  | CARM1  | 693_selected_genes |
| chr19 | 11031484  | 11031647  | CARM1  | 693_selected_genes |
| chr19 | 11031700  | 11031828  | CARM1  | 693_selected_genes |
| chr19 | 11032025  | 11032144  | CARM1  | 693_selected_genes |
| chr19 | 11032265  | 11032458  | CARM1  | 693_selected_genes |
| chr2  | 202122929 | 202123130 | CASP8  | 693_selected_genes |
| chr2  | 202131158 | 202131539 | CASP8  | 693_selected_genes |
| chr2  | 202134207 | 202134353 | CASP8  | 693_selected_genes |
| chr2  | 202136199 | 202136369 | CASP8  | 693_selected_genes |
| chr2  | 202137334 | 202137524 | CASP8  | 693_selected_genes |
| chr2  | 202137595 | 202137690 | CASP8  | 693_selected_genes |
| chr2  | 202139586 | 202139701 | CASP8  | 693_selected_genes |
| chr2  | 202140220 | 202140297 | CASP8  | 693_selected_genes |
| chr2  | 202141524 | 202141716 | CASP8  | 693_selected_genes |
| chr2  | 202142419 | 202142553 | CASP8  | 693_selected_genes |
| chr2  | 202149513 | 202150065 | CASP8  | 693_selected_genes |
| chr2  | 202151156 | 202151342 | CASP8  | 693_selected_genes |
| chr2  | 202152123 | 202152222 | CASP8  | 693_selected_genes |
| chr5  | 95865499  | 95865609  | CAST   | 693_selected_genes |
| chr5  | 95998101  | 95998226  | CAST   | 693_selected_genes |
| chr5  | 95998815  | 95998895  | CAST   | 693_selected_genes |
| chr5  | 96011217  | 96011330  | CAST   | 693_selected_genes |
| chr5  | 96031514  | 96031636  | CAST   | 693_selected_genes |
| chr5  | 96058317  | 96058427  | CAST   | 693_selected_genes |
| chr5  | 96062472  | 96062588  | CAST   | 693_selected_genes |
| chr5  | 96063167  | 96063259  | CAST   | 693_selected_genes |
| chr5  | 96064831  | 96064938  | CAST   | 693_selected_genes |
| chr5  | 96065268  | 96065454  | CAST   | 693_selected_genes |
| chr5  | 96066458  | 96066589  | CAST   | 693_selected_genes |
| chr5  | 96071850  | 96071969  | CAST   | 693_selected_genes |
| chr5  | 96073527  | 96073676  | CAST   | 693_selected_genes |
| chr5  | 96075716  | 96075847  | CAST   | 693_selected_genes |
| chr5  | 96076423  | 96076512  | CAST   | 693_selected_genes |
| chr5  | 96076944  | 96077087  | CAST   | 693_selected_genes |
| chr5  | 96077172  | 96077314  | CAST   | 693_selected_genes |
| chr5  | 96078333  | 96078485  | CAST   | 693_selected_genes |
| chr5  | 96079247  | 96079475  | CAST   | 693_selected_genes |
| chr5  | 96082020  | 96082154  | CAST   | 693_selected_genes |
| chr5  | 96083023  | 96083128  | CAST   | 693_selected_genes |
| chr5  | 96084196  | 96084342  | CAST   | 693_selected_genes |
| chr5  | 96086265  | 96086411  | CAST   | 693_selected_genes |
| chr5  | 96089738  | 96089890  | CAST   | 693_selected_genes |
| chr5  | 96090336  | 96090470  | CAST   | 693_selected_genes |
| chr5  | 96093122  | 96093223  | CAST   | 693_selected_genes |
| chr5  | 96093261  | 96093383  | CAST   | 693_selected_genes |
| chr5  | 96097952  | 96098101  | CAST   | 693_selected_genes |
| chr5  | 96100899  | 96101054  | CAST   | 693_selected_genes |
| chr5  | 96101731  | 96101874  | CAST   | 693_selected_genes |
| chr5  | 96103116  | 96103211  | CAST   | 693_selected_genes |
| chr5  | 96103585  | 96103728  | CAST   | 693_selected_genes |
| chr5  | 96106209  | 96106331  | CAST   | 693_selected_genes |
| chr5  | 96107322  | 96107408  | CAST   | 693_selected_genes |
| chr16 | 67063285  | 67063413  | CBFB   | 693_selected_genes |
| chr16 | 67063604  | 67063741  | CBFB   | 693_selected_genes |
| chr16 | 67070516  | 67070683  | CBFB   | 693_selected_genes |
| chr16 | 67100559  | 67100726  | CBFB   | 693_selected_genes |
| chr16 | 67116090  | 67116267  | CBFB   | 693_selected_genes |
| chr16 | 67132587  | 67132706  | CBFB   | 693_selected_genes |

|       |           |           |       |                    |
|-------|-----------|-----------|-------|--------------------|
| chr11 | 119077102 | 119077347 | CBL   | 693_selected_genes |
| chr11 | 119103132 | 119103430 | CBL   | 693_selected_genes |
| chr11 | 119142419 | 119142616 | CBL   | 693_selected_genes |
| chr11 | 119144552 | 119144759 | CBL   | 693_selected_genes |
| chr11 | 119145516 | 119145688 | CBL   | 693_selected_genes |
| chr11 | 119146681 | 119146869 | CBL   | 693_selected_genes |
| chr11 | 119148441 | 119148579 | CBL   | 693_selected_genes |
| chr11 | 119148850 | 119149032 | CBL   | 693_selected_genes |
| chr11 | 119149194 | 119149448 | CBL   | 693_selected_genes |
| chr11 | 119155653 | 119155835 | CBL   | 693_selected_genes |
| chr11 | 119155873 | 119156301 | CBL   | 693_selected_genes |
| chr11 | 119158536 | 119158681 | CBL   | 693_selected_genes |
| chr11 | 119167602 | 119167769 | CBL   | 693_selected_genes |
| chr11 | 119168068 | 119168216 | CBL   | 693_selected_genes |
| chr11 | 119169042 | 119169275 | CBL   | 693_selected_genes |
| chr11 | 119170179 | 119170516 | CBL   | 693_selected_genes |
| chr3  | 105377788 | 105378098 | CBLB  | 693_selected_genes |
| chr3  | 105389051 | 105389221 | CBLB  | 693_selected_genes |
| chr3  | 105397249 | 105397440 | CBLB  | 693_selected_genes |
| chr3  | 105400292 | 105400479 | CBLB  | 693_selected_genes |
| chr3  | 105400525 | 105400687 | CBLB  | 693_selected_genes |
| chr3  | 105404138 | 105404335 | CBLB  | 693_selected_genes |
| chr3  | 105412312 | 105412457 | CBLB  | 693_selected_genes |
| chr3  | 105420912 | 105421328 | CBLB  | 693_selected_genes |
| chr3  | 105422806 | 105423042 | CBLB  | 693_selected_genes |
| chr3  | 105438865 | 105439119 | CBLB  | 693_selected_genes |
| chr3  | 105452827 | 105453009 | CBLB  | 693_selected_genes |
| chr3  | 105455989 | 105456127 | CBLB  | 693_selected_genes |
| chr3  | 105459312 | 105459500 | CBLB  | 693_selected_genes |
| chr3  | 105464735 | 105464907 | CBLB  | 693_selected_genes |
| chr3  | 105468542 | 105468634 | CBLB  | 693_selected_genes |
| chr3  | 105470280 | 105470487 | CBLB  | 693_selected_genes |
| chr3  | 105495214 | 105495411 | CBLB  | 693_selected_genes |
| chr3  | 105572232 | 105572533 | CBLB  | 693_selected_genes |
| chr3  | 105586228 | 105586460 | CBLB  | 693_selected_genes |
| chr3  | 105588155 | 105588257 | CBLB  | 693_selected_genes |
| chr19 | 45281163  | 45281566  | CBLC  | 693_selected_genes |
| chr19 | 45284136  | 45284333  | CBLC  | 693_selected_genes |
| chr19 | 45284438  | 45284645  | CBLC  | 693_selected_genes |
| chr19 | 45285601  | 45285773  | CBLC  | 693_selected_genes |
| chr19 | 45287495  | 45287683  | CBLC  | 693_selected_genes |
| chr19 | 45293235  | 45293373  | CBLC  | 693_selected_genes |
| chr19 | 45295614  | 45295796  | CBLC  | 693_selected_genes |
| chr19 | 45296705  | 45296902  | CBLC  | 693_selected_genes |
| chr19 | 45297435  | 45297563  | CBLC  | 693_selected_genes |
| chr19 | 45303612  | 45303725  | CBLC  | 693_selected_genes |
| chr10 | 70481268  | 70481445  | CCAR1 | 693_selected_genes |
| chr10 | 70482186  | 70482359  | CCAR1 | 693_selected_genes |
| chr10 | 70496607  | 70496830  | CCAR1 | 693_selected_genes |
| chr10 | 70497576  | 70497671  | CCAR1 | 693_selected_genes |
| chr10 | 70500360  | 70500443  | CCAR1 | 693_selected_genes |
| chr10 | 70502107  | 70502351  | CCAR1 | 693_selected_genes |
| chr10 | 70506892  | 70507057  | CCAR1 | 693_selected_genes |
| chr10 | 70507105  | 70507348  | CCAR1 | 693_selected_genes |
| chr10 | 70508867  | 70509047  | CCAR1 | 693_selected_genes |
| chr10 | 70509255  | 70509467  | CCAR1 | 693_selected_genes |
| chr10 | 70513583  | 70513859  | CCAR1 | 693_selected_genes |
| chr10 | 70514445  | 70514609  | CCAR1 | 693_selected_genes |
| chr10 | 70515101  | 70515318  | CCAR1 | 693_selected_genes |
| chr10 | 70516004  | 70516392  | CCAR1 | 693_selected_genes |
| chr10 | 70517025  | 70517159  | CCAR1 | 693_selected_genes |
| chr10 | 70520738  | 70520974  | CCAR1 | 693_selected_genes |
| chr10 | 70525619  | 70525861  | CCAR1 | 693_selected_genes |
| chr10 | 70530937  | 70531227  | CCAR1 | 693_selected_genes |
| chr10 | 70532719  | 70532881  | CCAR1 | 693_selected_genes |
| chr10 | 70545867  | 70546000  | CCAR1 | 693_selected_genes |
| chr10 | 70546277  | 70546474  | CCAR1 | 693_selected_genes |
| chr10 | 70547658  | 70547829  | CCAR1 | 693_selected_genes |
| chr10 | 70547874  | 70548110  | CCAR1 | 693_selected_genes |
| chr10 | 70549441  | 70549697  | CCAR1 | 693_selected_genes |
| chr10 | 70550938  | 70551048  | CCAR1 | 693_selected_genes |
| chr11 | 69456056  | 69456304  | CCND1 | 693_selected_genes |
| chr11 | 69457773  | 69458039  | CCND1 | 693_selected_genes |
| chr11 | 69458574  | 69458784  | CCND1 | 693_selected_genes |
| chr11 | 69462736  | 69462935  | CCND1 | 693_selected_genes |
| chr11 | 69465860  | 69466075  | CCND1 | 693_selected_genes |
| chr12 | 4383181   | 4383426   | CCND2 | 693_selected_genes |
| chr12 | 4385145   | 4385411   | CCND2 | 693_selected_genes |
| chr12 | 4387900   | 4388110   | CCND2 | 693_selected_genes |
| chr12 | 4397982   | 4398181   | CCND2 | 693_selected_genes |
| chr12 | 4406897   | 4407141   | CCND2 | 693_selected_genes |
| chr12 | 4409000   | 4409200   | CCND2 | 693_selected_genes |
| chr6  | 41903563  | 41903870  | CCND3 | 693_selected_genes |
| chr6  | 41904256  | 41904458  | CCND3 | 693_selected_genes |

|       |           |           |       |                    |
|-------|-----------|-----------|-------|--------------------|
| chr6  | 41904947  | 41905157  | CCND3 | 693_selected_genes |
| chr6  | 41908082  | 41908348  | CCND3 | 693_selected_genes |
| chr6  | 41908664  | 41908762  | CCND3 | 693_selected_genes |
| chr6  | 41909164  | 41909412  | CCND3 | 693_selected_genes |
| chr19 | 30303437  | 30303510  | CCNE1 | 693_selected_genes |
| chr19 | 30303570  | 30303708  | CCNE1 | 693_selected_genes |
| chr19 | 30303850  | 30303969  | CCNE1 | 693_selected_genes |
| chr19 | 30308018  | 30308214  | CCNE1 | 693_selected_genes |
| chr19 | 30308287  | 30308491  | CCNE1 | 693_selected_genes |
| chr19 | 30311583  | 30311780  | CCNE1 | 693_selected_genes |
| chr19 | 30312603  | 30312749  | CCNE1 | 693_selected_genes |
| chr19 | 30312877  | 30313062  | CCNE1 | 693_selected_genes |
| chr19 | 30313121  | 30313283  | CCNE1 | 693_selected_genes |
| chr19 | 30313327  | 30313535  | CCNE1 | 693_selected_genes |
| chr19 | 30314536  | 30314709  | CCNE1 | 693_selected_genes |
| chr1  | 158150866 | 158150977 | CD1D  | 693_selected_genes |
| chr1  | 158151219 | 158151536 | CD1D  | 693_selected_genes |
| chr1  | 158151796 | 158152125 | CD1D  | 693_selected_genes |
| chr1  | 158152642 | 158152971 | CD1D  | 693_selected_genes |
| chr1  | 158153700 | 158153850 | CD1D  | 693_selected_genes |
| chr1  | 158153893 | 158153965 | CD1D  | 693_selected_genes |
| chr9  | 5456088   | 5456190   | CD274 | 693_selected_genes |
| chr9  | 5457053   | 5457445   | CD274 | 693_selected_genes |
| chr9  | 5462808   | 5463202   | CD274 | 693_selected_genes |
| chr9  | 5465473   | 5465631   | CD274 | 693_selected_genes |
| chr9  | 5466744   | 5466854   | CD274 | 693_selected_genes |
| chr9  | 5467814   | 5467887   | CD274 | 693_selected_genes |
| chr15 | 73983029  | 73983142  | CD276 | 693_selected_genes |
| chr15 | 73991901  | 73992084  | CD276 | 693_selected_genes |
| chr15 | 73994570  | 73994959  | CD276 | 693_selected_genes |
| chr15 | 73995087  | 73995452  | CD276 | 693_selected_genes |
| chr15 | 73995974  | 73996363  | CD276 | 693_selected_genes |
| chr15 | 73996491  | 73996838  | CD276 | 693_selected_genes |
| chr15 | 74000654  | 74000839  | CD276 | 693_selected_genes |
| chr15 | 74001963  | 74002055  | CD276 | 693_selected_genes |
| chr15 | 74003450  | 74003556  | CD276 | 693_selected_genes |
| chr15 | 74005249  | 74005322  | CD276 | 693_selected_genes |
| chr19 | 6583285   | 6583514   | CD70  | 693_selected_genes |
| chr19 | 6586005   | 6586441   | CD70  | 693_selected_genes |
| chr19 | 6590088   | 6590172   | CD70  | 693_selected_genes |
| chr19 | 6590826   | 6591038   | CD70  | 693_selected_genes |
| chr19 | 42381349  | 42381478  | CD79A | 693_selected_genes |
| chr19 | 42383034  | 42383748  | CD79A | 693_selected_genes |
| chr19 | 42384711  | 42384830  | CD79A | 693_selected_genes |
| chr19 | 42384908  | 42385072  | CD79A | 693_selected_genes |
| chr17 | 62006560  | 62006709  | CD79B | 693_selected_genes |
| chr17 | 62006768  | 62006860  | CD79B | 693_selected_genes |
| chr17 | 62007104  | 62007273  | CD79B | 693_selected_genes |
| chr17 | 62007408  | 62007770  | CD79B | 693_selected_genes |
| chr17 | 62008669  | 62008773  | CD79B | 693_selected_genes |
| chr17 | 62009529  | 62009646  | CD79B | 693_selected_genes |
| chr17 | 45198275  | 45198408  | CDC27 | 693_selected_genes |
| chr17 | 45199784  | 45200010  | CDC27 | 693_selected_genes |
| chr17 | 45201226  | 45201351  | CDC27 | 693_selected_genes |
| chr17 | 45206733  | 45206912  | CDC27 | 693_selected_genes |
| chr17 | 45209597  | 45209765  | CDC27 | 693_selected_genes |
| chr17 | 45214492  | 45214751  | CDC27 | 693_selected_genes |
| chr17 | 45216079  | 45216282  | CDC27 | 693_selected_genes |
| chr17 | 45217296  | 45217364  | CDC27 | 693_selected_genes |
| chr17 | 45219193  | 45219416  | CDC27 | 693_selected_genes |
| chr17 | 45219569  | 45219827  | CDC27 | 693_selected_genes |
| chr17 | 45221223  | 45221373  | CDC27 | 693_selected_genes |
| chr17 | 45229146  | 45229327  | CDC27 | 693_selected_genes |
| chr17 | 45232012  | 45232255  | CDC27 | 693_selected_genes |
| chr17 | 45234253  | 45234515  | CDC27 | 693_selected_genes |
| chr17 | 45234570  | 45234775  | CDC27 | 693_selected_genes |
| chr17 | 45235546  | 45235694  | CDC27 | 693_selected_genes |
| chr17 | 45247257  | 45247433  | CDC27 | 693_selected_genes |
| chr17 | 45249257  | 45249455  | CDC27 | 693_selected_genes |
| chr17 | 45258902  | 45259028  | CDC27 | 693_selected_genes |
| chr17 | 45266486  | 45266563  | CDC27 | 693_selected_genes |
| chr1  | 193091305 | 193091486 | CDC73 | 693_selected_genes |
| chr1  | 193094216 | 193094372 | CDC73 | 693_selected_genes |
| chr1  | 193099278 | 193099398 | CDC73 | 693_selected_genes |
| chr1  | 193104495 | 193104608 | CDC73 | 693_selected_genes |
| chr1  | 193104641 | 193104744 | CDC73 | 693_selected_genes |
| chr1  | 193107189 | 193107328 | CDC73 | 693_selected_genes |
| chr1  | 193110954 | 193111221 | CDC73 | 693_selected_genes |
| chr1  | 193116971 | 193117120 | CDC73 | 693_selected_genes |
| chr1  | 193119408 | 193119537 | CDC73 | 693_selected_genes |
| chr1  | 193121484 | 193121599 | CDC73 | 693_selected_genes |
| chr1  | 193172899 | 193173007 | CDC73 | 693_selected_genes |
| chr1  | 193181169 | 193181255 | CDC73 | 693_selected_genes |
| chr1  | 193181494 | 193181632 | CDC73 | 693_selected_genes |

|       |           |           |        |                    |
|-------|-----------|-----------|--------|--------------------|
| chr1  | 193202097 | 193202309 | CDC73  | 693_selected_genes |
| chr1  | 193205360 | 193205511 | CDC73  | 693_selected_genes |
| chr1  | 193218834 | 193219026 | CDC73  | 693_selected_genes |
| chr1  | 193219780 | 193219867 | CDC73  | 693_selected_genes |
| chr16 | 68771293  | 68771391  | CDH1   | 693_selected_genes |
| chr16 | 68772174  | 68772339  | CDH1   | 693_selected_genes |
| chr16 | 68835547  | 68835821  | CDH1   | 693_selected_genes |
| chr16 | 68842301  | 68842495  | CDH1   | 693_selected_genes |
| chr16 | 68842570  | 68842776  | CDH1   | 693_selected_genes |
| chr16 | 68844074  | 68844269  | CDH1   | 693_selected_genes |
| chr16 | 68845561  | 68845787  | CDH1   | 693_selected_genes |
| chr16 | 68846012  | 68846191  | CDH1   | 693_selected_genes |
| chr16 | 68847190  | 68847490  | CDH1   | 693_selected_genes |
| chr16 | 68849392  | 68849687  | CDH1   | 693_selected_genes |
| chr16 | 68853157  | 68853353  | CDH1   | 693_selected_genes |
| chr16 | 68855878  | 68856153  | CDH1   | 693_selected_genes |
| chr16 | 68857276  | 68857554  | CDH1   | 693_selected_genes |
| chr16 | 68862051  | 68862232  | CDH1   | 693_selected_genes |
| chr16 | 68863531  | 68863725  | CDH1   | 693_selected_genes |
| chr16 | 68867167  | 68867427  | CDH1   | 693_selected_genes |
| chr18 | 59157761  | 59158057  | CDH20  | 693_selected_genes |
| chr18 | 59166393  | 59166738  | CDH20  | 693_selected_genes |
| chr18 | 59167590  | 59167760  | CDH20  | 693_selected_genes |
| chr18 | 59170160  | 59170378  | CDH20  | 693_selected_genes |
| chr18 | 59174580  | 59174818  | CDH20  | 693_selected_genes |
| chr18 | 59195174  | 59195478  | CDH20  | 693_selected_genes |
| chr18 | 59203700  | 59203887  | CDH20  | 693_selected_genes |
| chr18 | 59206231  | 59206403  | CDH20  | 693_selected_genes |
| chr18 | 59212234  | 59212402  | CDH20  | 693_selected_genes |
| chr18 | 59217185  | 59217487  | CDH20  | 693_selected_genes |
| chr18 | 59221397  | 59221953  | CDH20  | 693_selected_genes |
| chr17 | 37618299  | 37619395  | CDK12  | 693_selected_genes |
| chr17 | 37627106  | 37628041  | CDK12  | 693_selected_genes |
| chr17 | 37646784  | 37647011  | CDK12  | 693_selected_genes |
| chr17 | 37648978  | 37649168  | CDK12  | 693_selected_genes |
| chr17 | 37650751  | 37650972  | CDK12  | 693_selected_genes |
| chr17 | 37657477  | 37657717  | CDK12  | 693_selected_genes |
| chr17 | 37665932  | 37666039  | CDK12  | 693_selected_genes |
| chr17 | 37667756  | 37667908  | CDK12  | 693_selected_genes |
| chr17 | 37671958  | 37672086  | CDK12  | 693_selected_genes |
| chr17 | 37673667  | 37673834  | CDK12  | 693_selected_genes |
| chr17 | 37676183  | 37676365  | CDK12  | 693_selected_genes |
| chr17 | 37680901  | 37681163  | CDK12  | 693_selected_genes |
| chr17 | 37682091  | 37682594  | CDK12  | 693_selected_genes |
| chr17 | 37686831  | 37687594  | CDK12  | 693_selected_genes |
| chr17 | 37700476  | 37700555  | CDK12  | 693_selected_genes |
| chr12 | 56360767  | 56360937  | CDK2   | 693_selected_genes |
| chr12 | 56361615  | 56361743  | CDK2   | 693_selected_genes |
| chr12 | 56361807  | 56361978  | CDK2   | 693_selected_genes |
| chr12 | 56362536  | 56362757  | CDK2   | 693_selected_genes |
| chr12 | 56363233  | 56363385  | CDK2   | 693_selected_genes |
| chr12 | 56364356  | 56364550  | CDK2   | 693_selected_genes |
| chr12 | 56364802  | 56365056  | CDK2   | 693_selected_genes |
| chr12 | 56365279  | 56365434  | CDK2   | 693_selected_genes |
| chr12 | 58142282  | 58142425  | CDK4   | 693_selected_genes |
| chr12 | 58142939  | 58143125  | CDK4   | 693_selected_genes |
| chr12 | 58143211  | 58143312  | CDK4   | 693_selected_genes |
| chr12 | 58144237  | 58144371  | CDK4   | 693_selected_genes |
| chr12 | 58144413  | 58144573  | CDK4   | 693_selected_genes |
| chr12 | 58144680  | 58144898  | CDK4   | 693_selected_genes |
| chr12 | 58144964  | 58145150  | CDK4   | 693_selected_genes |
| chr12 | 58145257  | 58145525  | CDK4   | 693_selected_genes |
| chr7  | 92244428  | 92244625  | CDK6   | 693_selected_genes |
| chr7  | 92247360  | 92247546  | CDK6   | 693_selected_genes |
| chr7  | 92252324  | 92252425  | CDK6   | 693_selected_genes |
| chr7  | 92300714  | 92300874  | CDK6   | 693_selected_genes |
| chr7  | 92354914  | 92355132  | CDK6   | 693_selected_genes |
| chr7  | 92403984  | 92404170  | CDK6   | 693_selected_genes |
| chr7  | 92462379  | 92462662  | CDK6   | 693_selected_genes |
| chr13 | 26828753  | 26828931  | CDK8   | 693_selected_genes |
| chr13 | 26911678  | 26911804  | CDK8   | 693_selected_genes |
| chr13 | 26923183  | 26923344  | CDK8   | 693_selected_genes |
| chr13 | 26927851  | 26928042  | CDK8   | 693_selected_genes |
| chr13 | 26956925  | 26957033  | CDK8   | 693_selected_genes |
| chr13 | 26959322  | 26959504  | CDK8   | 693_selected_genes |
| chr13 | 26967478  | 26967672  | CDK8   | 693_selected_genes |
| chr13 | 26970396  | 26970516  | CDK8   | 693_selected_genes |
| chr13 | 26971264  | 26971387  | CDK8   | 693_selected_genes |
| chr13 | 26974564  | 26974712  | CDK8   | 693_selected_genes |
| chr13 | 26975380  | 26975509  | CDK8   | 693_selected_genes |
| chr13 | 26975577  | 26975786  | CDK8   | 693_selected_genes |
| chr13 | 26978067  | 26978243  | CDK8   | 693_selected_genes |
| chr6  | 36645588  | 36645735  | CDKN1A | 693_selected_genes |
| chr6  | 36651848  | 36652348  | CDKN1A | 693_selected_genes |

|       |          |          |        |                    |
|-------|----------|----------|--------|--------------------|
| chr6  | 36653502 | 36653602 | CDKN1A | 693_selected_genes |
| chr12 | 12870748 | 12871273 | CDKN1B | 693_selected_genes |
| chr12 | 12871733 | 12871905 | CDKN1B | 693_selected_genes |
| chr12 | 12873973 | 12874166 | CDKN1B | 693_selected_genes |
| chr9  | 21968182 | 21968266 | CDKN2A | 693_selected_genes |
| chr9  | 21968698 | 21968795 | CDKN2A | 693_selected_genes |
| chr9  | 21969705 | 21969817 | CDKN2A | 693_selected_genes |
| chr9  | 21970864 | 21971232 | CDKN2A | 693_selected_genes |
| chr9  | 21974450 | 21974851 | CDKN2A | 693_selected_genes |
| chr9  | 21994112 | 21994478 | CDKN2A | 693_selected_genes |
| chr9  | 22005960 | 22006271 | CDKN2B | 693_selected_genes |
| chr9  | 22008690 | 22008977 | CDKN2B | 693_selected_genes |
| chr1  | 51436015 | 51436194 | CDKN2C | 693_selected_genes |
| chr1  | 51439539 | 51439967 | CDKN2C | 693_selected_genes |
| chr19 | 33792218 | 33793450 | CEBPA  | 693_selected_genes |
| chr17 | 7788099  | 7788426  | CHD3   | 693_selected_genes |
| chr17 | 7792293  | 7792443  | CHD3   | 693_selected_genes |
| chr17 | 7792956  | 7793119  | CHD3   | 693_selected_genes |
| chr17 | 7793863  | 7794084  | CHD3   | 693_selected_genes |
| chr17 | 7794232  | 7794407  | CHD3   | 693_selected_genes |
| chr17 | 7796578  | 7796912  | CHD3   | 693_selected_genes |
| chr17 | 7797097  | 7797278  | CHD3   | 693_selected_genes |
| chr17 | 7797407  | 7797608  | CHD3   | 693_selected_genes |
| chr17 | 7797707  | 7797951  | CHD3   | 693_selected_genes |
| chr17 | 7798209  | 7798493  | CHD3   | 693_selected_genes |
| chr17 | 7798631  | 7798885  | CHD3   | 693_selected_genes |
| chr17 | 7800375  | 7800637  | CHD3   | 693_selected_genes |
| chr17 | 7801263  | 7801445  | CHD3   | 693_selected_genes |
| chr17 | 7801788  | 7801938  | CHD3   | 693_selected_genes |
| chr17 | 7802303  | 7802545  | CHD3   | 693_selected_genes |
| chr17 | 7802635  | 7802886  | CHD3   | 693_selected_genes |
| chr17 | 7803188  | 7803376  | CHD3   | 693_selected_genes |
| chr17 | 7803582  | 7803754  | CHD3   | 693_selected_genes |
| chr17 | 7803850  | 7804074  | CHD3   | 693_selected_genes |
| chr17 | 7804144  | 7804336  | CHD3   | 693_selected_genes |
| chr17 | 7804536  | 7804718  | CHD3   | 693_selected_genes |
| chr17 | 7805902  | 7806070  | CHD3   | 693_selected_genes |
| chr17 | 7806229  | 7806404  | CHD3   | 693_selected_genes |
| chr17 | 7806564  | 7806846  | CHD3   | 693_selected_genes |
| chr17 | 7807117  | 7807334  | CHD3   | 693_selected_genes |
| chr17 | 7807421  | 7807519  | CHD3   | 693_selected_genes |
| chr17 | 7807734  | 7807962  | CHD3   | 693_selected_genes |
| chr17 | 7808392  | 7808508  | CHD3   | 693_selected_genes |
| chr17 | 7808913  | 7809049  | CHD3   | 693_selected_genes |
| chr17 | 7809148  | 7809332  | CHD3   | 693_selected_genes |
| chr17 | 7809845  | 7810040  | CHD3   | 693_selected_genes |
| chr17 | 7810161  | 7810374  | CHD3   | 693_selected_genes |
| chr17 | 7810418  | 7810590  | CHD3   | 693_selected_genes |
| chr17 | 7810645  | 7810831  | CHD3   | 693_selected_genes |
| chr17 | 7810893  | 7811045  | CHD3   | 693_selected_genes |
| chr17 | 7811183  | 7811362  | CHD3   | 693_selected_genes |
| chr17 | 7811694  | 7811853  | CHD3   | 693_selected_genes |
| chr17 | 7811989  | 7812172  | CHD3   | 693_selected_genes |
| chr17 | 7812435  | 7812727  | CHD3   | 693_selected_genes |
| chr17 | 7813720  | 7813934  | CHD3   | 693_selected_genes |
| chr17 | 7814139  | 7814316  | CHD3   | 693_selected_genes |
| chr17 | 7814756  | 7815047  | CHD3   | 693_selected_genes |
| chr12 | 6679816  | 6679884  | CHD4   | 693_selected_genes |
| chr12 | 6680009  | 6680223  | CHD4   | 693_selected_genes |
| chr12 | 6682214  | 6682460  | CHD4   | 693_selected_genes |
| chr12 | 6686925  | 6687108  | CHD4   | 693_selected_genes |
| chr12 | 6687169  | 6687328  | CHD4   | 693_selected_genes |
| chr12 | 6687549  | 6687737  | CHD4   | 693_selected_genes |
| chr12 | 6687986  | 6688108  | CHD4   | 693_selected_genes |
| chr12 | 6690184  | 6690364  | CHD4   | 693_selected_genes |
| chr12 | 6690431  | 6690579  | CHD4   | 693_selected_genes |
| chr12 | 6690789  | 6691005  | CHD4   | 693_selected_genes |
| chr12 | 6691277  | 6691472  | CHD4   | 693_selected_genes |
| chr12 | 6691755  | 6691939  | CHD4   | 693_selected_genes |
| chr12 | 6691988  | 6692127  | CHD4   | 693_selected_genes |
| chr12 | 6692167  | 6692569  | CHD4   | 693_selected_genes |
| chr12 | 6696524  | 6696750  | CHD4   | 693_selected_genes |
| chr12 | 6696852  | 6697140  | CHD4   | 693_selected_genes |
| chr12 | 6697438  | 6697613  | CHD4   | 693_selected_genes |
| chr12 | 6700606  | 6700774  | CHD4   | 693_selected_genes |
| chr12 | 6700834  | 6701016  | CHD4   | 693_selected_genes |
| chr12 | 6701056  | 6701248  | CHD4   | 693_selected_genes |
| chr12 | 6701533  | 6701757  | CHD4   | 693_selected_genes |
| chr12 | 6701836  | 6702008  | CHD4   | 693_selected_genes |
| chr12 | 6702231  | 6702419  | CHD4   | 693_selected_genes |
| chr12 | 6702556  | 6702807  | CHD4   | 693_selected_genes |
| chr12 | 6703599  | 6703841  | CHD4   | 693_selected_genes |
| chr12 | 6704474  | 6704621  | CHD4   | 693_selected_genes |
| chr12 | 6705146  | 6705328  | CHD4   | 693_selected_genes |

|       |           |           |       |                    |
|-------|-----------|-----------|-------|--------------------|
| chr12 | 6707034   | 6707290   | CHD4  | 693_selected_genes |
| chr12 | 6707362   | 6707616   | CHD4  | 693_selected_genes |
| chr12 | 6708913   | 6709203   | CHD4  | 693_selected_genes |
| chr12 | 6709357   | 6709586   | CHD4  | 693_selected_genes |
| chr12 | 6709674   | 6709860   | CHD4  | 693_selected_genes |
| chr12 | 6710066   | 6710244   | CHD4  | 693_selected_genes |
| chr12 | 6710429   | 6710721   | CHD4  | 693_selected_genes |
| chr12 | 6710788   | 6710957   | CHD4  | 693_selected_genes |
| chr12 | 6711100   | 6711366   | CHD4  | 693_selected_genes |
| chr12 | 6711516   | 6711688   | CHD4  | 693_selected_genes |
| chr12 | 6715414   | 6715564   | CHD4  | 693_selected_genes |
| chr14 | 21853746  | 21854360  | CHD8  | 693_selected_genes |
| chr14 | 21859080  | 21859247  | CHD8  | 693_selected_genes |
| chr14 | 21859596  | 21859826  | CHD8  | 693_selected_genes |
| chr14 | 21859966  | 21860130  | CHD8  | 693_selected_genes |
| chr14 | 21860640  | 21860993  | CHD8  | 693_selected_genes |
| chr14 | 21861239  | 21861438  | CHD8  | 693_selected_genes |
| chr14 | 21861609  | 21862379  | CHD8  | 693_selected_genes |
| chr14 | 21862410  | 21862669  | CHD8  | 693_selected_genes |
| chr14 | 21863045  | 21863303  | CHD8  | 693_selected_genes |
| chr14 | 21863431  | 21863536  | CHD8  | 693_selected_genes |
| chr14 | 21863950  | 21864076  | CHD8  | 693_selected_genes |
| chr14 | 21865956  | 21866136  | CHD8  | 693_selected_genes |
| chr14 | 21867735  | 21867889  | CHD8  | 693_selected_genes |
| chr14 | 21868114  | 21868254  | CHD8  | 693_selected_genes |
| chr14 | 21868284  | 21868515  | CHD8  | 693_selected_genes |
| chr14 | 21868546  | 21868796  | CHD8  | 693_selected_genes |
| chr14 | 21869008  | 21869255  | CHD8  | 693_selected_genes |
| chr14 | 21869536  | 21869697  | CHD8  | 693_selected_genes |
| chr14 | 21870090  | 21870320  | CHD8  | 693_selected_genes |
| chr14 | 21870469  | 21870687  | CHD8  | 693_selected_genes |
| chr14 | 21871150  | 21871396  | CHD8  | 693_selected_genes |
| chr14 | 21871586  | 21871847  | CHD8  | 693_selected_genes |
| chr14 | 21873342  | 21873648  | CHD8  | 693_selected_genes |
| chr14 | 21873854  | 21874048  | CHD8  | 693_selected_genes |
| chr14 | 21874989  | 21875216  | CHD8  | 693_selected_genes |
| chr14 | 21876445  | 21876739  | CHD8  | 693_selected_genes |
| chr14 | 21876837  | 21877009  | CHD8  | 693_selected_genes |
| chr14 | 21877984  | 21878172  | CHD8  | 693_selected_genes |
| chr14 | 21881046  | 21881180  | CHD8  | 693_selected_genes |
| chr14 | 21882434  | 21882602  | CHD8  | 693_selected_genes |
| chr14 | 21883071  | 21883177  | CHD8  | 693_selected_genes |
| chr14 | 21883707  | 21883826  | CHD8  | 693_selected_genes |
| chr14 | 21883858  | 21884091  | CHD8  | 693_selected_genes |
| chr14 | 21894261  | 21894426  | CHD8  | 693_selected_genes |
| chr14 | 21896002  | 21896438  | CHD8  | 693_selected_genes |
| chr14 | 21897097  | 21897519  | CHD8  | 693_selected_genes |
| chr14 | 21898934  | 21899827  | CHD8  | 693_selected_genes |
| chr14 | 21899944  | 21900000  | CHD8  | 693_selected_genes |
| chr14 | 21905034  | 21905180  | CHD8  | 693_selected_genes |
| chr11 | 125495630 | 125495932 | CHEK1 | 693_selected_genes |
| chr11 | 125496618 | 125496753 | CHEK1 | 693_selected_genes |
| chr11 | 125497476 | 125497750 | CHEK1 | 693_selected_genes |
| chr11 | 125499101 | 125499216 | CHEK1 | 693_selected_genes |
| chr11 | 125499260 | 125499380 | CHEK1 | 693_selected_genes |
| chr11 | 125503032 | 125503271 | CHEK1 | 693_selected_genes |
| chr11 | 125505298 | 125505453 | CHEK1 | 693_selected_genes |
| chr11 | 125507318 | 125507465 | CHEK1 | 693_selected_genes |
| chr11 | 125513661 | 125513820 | CHEK1 | 693_selected_genes |
| chr11 | 125513960 | 125514188 | CHEK1 | 693_selected_genes |
| chr11 | 125514381 | 125514563 | CHEK1 | 693_selected_genes |
| chr11 | 125523615 | 125523767 | CHEK1 | 693_selected_genes |
| chr11 | 125525094 | 125525240 | CHEK1 | 693_selected_genes |
| chr22 | 29083859  | 29083999  | CHEK2 | 693_selected_genes |
| chr22 | 29085097  | 29085279  | CHEK2 | 693_selected_genes |
| chr22 | 29089994  | 29090130  | CHEK2 | 693_selected_genes |
| chr22 | 29091089  | 29091255  | CHEK2 | 693_selected_genes |
| chr22 | 29091672  | 29091886  | CHEK2 | 693_selected_genes |
| chr22 | 29092860  | 29093000  | CHEK2 | 693_selected_genes |
| chr22 | 29095800  | 29095950  | CHEK2 | 693_selected_genes |
| chr22 | 29099467  | 29099579  | CHEK2 | 693_selected_genes |
| chr22 | 29105968  | 29106072  | CHEK2 | 693_selected_genes |
| chr22 | 29107871  | 29108030  | CHEK2 | 693_selected_genes |
| chr22 | 29115357  | 29115498  | CHEK2 | 693_selected_genes |
| chr22 | 29117562  | 29117644  | CHEK2 | 693_selected_genes |
| chr22 | 29120844  | 29120936  | CHEK2 | 693_selected_genes |
| chr22 | 29120939  | 29121137  | CHEK2 | 693_selected_genes |
| chr22 | 29121205  | 29121380  | CHEK2 | 693_selected_genes |
| chr22 | 29125283  | 29125389  | CHEK2 | 693_selected_genes |
| chr22 | 29126382  | 29126561  | CHEK2 | 693_selected_genes |
| chr22 | 29130365  | 29130740  | CHEK2 | 693_selected_genes |
| chr22 | 29133222  | 29133296  | CHEK2 | 693_selected_genes |
| chr10 | 101949329 | 101949409 | CHUK  | 693_selected_genes |
| chr10 | 101950600 | 101950750 | CHUK  | 693_selected_genes |

|       |           |           |       |                    |
|-------|-----------|-----------|-------|--------------------|
| chr10 | 101953029 | 101953213 | CHUK  | 693_selected_genes |
| chr10 | 101953715 | 101953913 | CHUK  | 693_selected_genes |
| chr10 | 101954156 | 101954303 | CHUK  | 693_selected_genes |
| chr10 | 101959702 | 101959802 | CHUK  | 693_selected_genes |
| chr10 | 101960402 | 101960562 | CHUK  | 693_selected_genes |
| chr10 | 101961819 | 101961931 | CHUK  | 693_selected_genes |
| chr10 | 101964237 | 101964439 | CHUK  | 693_selected_genes |
| chr10 | 101964807 | 101964981 | CHUK  | 693_selected_genes |
| chr10 | 101966961 | 101967114 | CHUK  | 693_selected_genes |
| chr10 | 101969326 | 101969571 | CHUK  | 693_selected_genes |
| chr10 | 101977726 | 101977912 | CHUK  | 693_selected_genes |
| chr10 | 101978449 | 101978607 | CHUK  | 693_selected_genes |
| chr10 | 101978739 | 101978914 | CHUK  | 693_selected_genes |
| chr10 | 101979001 | 101979141 | CHUK  | 693_selected_genes |
| chr10 | 101980319 | 101980458 | CHUK  | 693_selected_genes |
| chr10 | 101981843 | 101981963 | CHUK  | 693_selected_genes |
| chr10 | 101982597 | 101982762 | CHUK  | 693_selected_genes |
| chr10 | 101985654 | 101985799 | CHUK  | 693_selected_genes |
| chr10 | 101989159 | 101989314 | CHUK  | 693_selected_genes |
| chr19 | 42775910  | 42778754  | CIC   | 693_selected_genes |
| chr19 | 42788831  | 42788948  | CIC   | 693_selected_genes |
| chr19 | 42790897  | 42791097  | CIC   | 693_selected_genes |
| chr19 | 42791132  | 42791417  | CIC   | 693_selected_genes |
| chr19 | 42791446  | 42791626  | CIC   | 693_selected_genes |
| chr19 | 42791671  | 42791904  | CIC   | 693_selected_genes |
| chr19 | 42791936  | 42792152  | CIC   | 693_selected_genes |
| chr19 | 42793014  | 42793267  | CIC   | 693_selected_genes |
| chr19 | 42793307  | 42793583  | CIC   | 693_selected_genes |
| chr19 | 42793974  | 42794128  | CIC   | 693_selected_genes |
| chr19 | 42794359  | 42795643  | CIC   | 693_selected_genes |
| chr19 | 42795684  | 42795922  | CIC   | 693_selected_genes |
| chr19 | 42796212  | 42796384  | CIC   | 693_selected_genes |
| chr19 | 42796426  | 42796643  | CIC   | 693_selected_genes |
| chr19 | 42796692  | 42797036  | CIC   | 693_selected_genes |
| chr19 | 42797082  | 42797458  | CIC   | 693_selected_genes |
| chr19 | 42797718  | 42798013  | CIC   | 693_selected_genes |
| chr19 | 42798061  | 42798266  | CIC   | 693_selected_genes |
| chr19 | 42798299  | 42798481  | CIC   | 693_selected_genes |
| chr19 | 42798701  | 42798912  | CIC   | 693_selected_genes |
| chr19 | 42798950  | 42799368  | CIC   | 693_selected_genes |
| chr17 | 57697467  | 57697559  | CLTC  | 693_selected_genes |
| chr17 | 57721611  | 57721881  | CLTC  | 693_selected_genes |
| chr17 | 57724733  | 57725052  | CLTC  | 693_selected_genes |
| chr17 | 57725575  | 57725787  | CLTC  | 693_selected_genes |
| chr17 | 57728538  | 57728702  | CLTC  | 693_selected_genes |
| chr17 | 57733189  | 57733413  | CLTC  | 693_selected_genes |
| chr17 | 57735997  | 57736053  | CLTC  | 693_selected_genes |
| chr17 | 57737726  | 57737974  | CLTC  | 693_selected_genes |
| chr17 | 57738778  | 57739029  | CLTC  | 693_selected_genes |
| chr17 | 57741177  | 57741380  | CLTC  | 693_selected_genes |
| chr17 | 57742122  | 57742295  | CLTC  | 693_selected_genes |
| chr17 | 57743438  | 57743626  | CLTC  | 693_selected_genes |
| chr17 | 57743815  | 57744030  | CLTC  | 693_selected_genes |
| chr17 | 57744132  | 57744363  | CLTC  | 693_selected_genes |
| chr17 | 57746112  | 57746326  | CLTC  | 693_selected_genes |
| chr17 | 57750982  | 57751158  | CLTC  | 693_selected_genes |
| chr17 | 57752036  | 57752229  | CLTC  | 693_selected_genes |
| chr17 | 57754289  | 57754574  | CLTC  | 693_selected_genes |
| chr17 | 57756732  | 57756905  | CLTC  | 693_selected_genes |
| chr17 | 57758247  | 57758443  | CLTC  | 693_selected_genes |
| chr17 | 57758630  | 57758864  | CLTC  | 693_selected_genes |
| chr17 | 57758982  | 57759225  | CLTC  | 693_selected_genes |
| chr17 | 57759606  | 57759814  | CLTC  | 693_selected_genes |
| chr17 | 57759964  | 57760179  | CLTC  | 693_selected_genes |
| chr17 | 57760242  | 57760400  | CLTC  | 693_selected_genes |
| chr17 | 57760430  | 57760648  | CLTC  | 693_selected_genes |
| chr17 | 57760722  | 57760922  | CLTC  | 693_selected_genes |
| chr17 | 57760960  | 57761142  | CLTC  | 693_selected_genes |
| chr17 | 57761210  | 57761371  | CLTC  | 693_selected_genes |
| chr17 | 57762391  | 57762612  | CLTC  | 693_selected_genes |
| chr17 | 57762922  | 57763194  | CLTC  | 693_selected_genes |
| chr17 | 57764336  | 57764449  | CLTC  | 693_selected_genes |
| chr17 | 57767971  | 57768114  | CLTC  | 693_selected_genes |
| chr17 | 57771063  | 57771238  | CLTC  | 693_selected_genes |
| chr16 | 58554836  | 58554965  | CNOT1 | 693_selected_genes |
| chr16 | 58555061  | 58555246  | CNOT1 | 693_selected_genes |
| chr16 | 58557248  | 58557431  | CNOT1 | 693_selected_genes |
| chr16 | 58559057  | 58559288  | CNOT1 | 693_selected_genes |
| chr16 | 58559867  | 58560067  | CNOT1 | 693_selected_genes |
| chr16 | 58561969  | 58562034  | CNOT1 | 693_selected_genes |
| chr16 | 58562353  | 58562577  | CNOT1 | 693_selected_genes |
| chr16 | 58564124  | 58564276  | CNOT1 | 693_selected_genes |
| chr16 | 58565836  | 58566004  | CNOT1 | 693_selected_genes |
| chr16 | 58566110  | 58566324  | CNOT1 | 693_selected_genes |

|       |          |          |         |                    |
|-------|----------|----------|---------|--------------------|
| chr16 | 58568025 | 58568324 | CNOT1   | 693_selected_genes |
| chr16 | 58570846 | 58571149 | CNOT1   | 693_selected_genes |
| chr16 | 58571769 | 58571989 | CNOT1   | 693_selected_genes |
| chr16 | 58572036 | 58572195 | CNOT1   | 693_selected_genes |
| chr16 | 58572650 | 58572843 | CNOT1   | 693_selected_genes |
| chr16 | 58573646 | 58573888 | CNOT1   | 693_selected_genes |
| chr16 | 58575379 | 58575549 | CNOT1   | 693_selected_genes |
| chr16 | 58576109 | 58576264 | CNOT1   | 693_selected_genes |
| chr16 | 58576306 | 58576497 | CNOT1   | 693_selected_genes |
| chr16 | 58577162 | 58577221 | CNOT1   | 693_selected_genes |
| chr16 | 58577263 | 58577832 | CNOT1   | 693_selected_genes |
| chr16 | 58579239 | 58579420 | CNOT1   | 693_selected_genes |
| chr16 | 58580199 | 58580427 | CNOT1   | 693_selected_genes |
| chr16 | 58580550 | 58580678 | CNOT1   | 693_selected_genes |
| chr16 | 58581064 | 58581225 | CNOT1   | 693_selected_genes |
| chr16 | 58581444 | 58581611 | CNOT1   | 693_selected_genes |
| chr16 | 58583597 | 58583827 | CNOT1   | 693_selected_genes |
| chr16 | 58585010 | 58585201 | CNOT1   | 693_selected_genes |
| chr16 | 58585467 | 58585748 | CNOT1   | 693_selected_genes |
| chr16 | 58587660 | 58587789 | CNOT1   | 693_selected_genes |
| chr16 | 58589129 | 58589466 | CNOT1   | 693_selected_genes |
| chr16 | 58589662 | 58589837 | CNOT1   | 693_selected_genes |
| chr16 | 58590725 | 58590922 | CNOT1   | 693_selected_genes |
| chr16 | 58592351 | 58592603 | CNOT1   | 693_selected_genes |
| chr16 | 58594090 | 58594291 | CNOT1   | 693_selected_genes |
| chr16 | 58608487 | 58608689 | CNOT1   | 693_selected_genes |
| chr16 | 58608885 | 58609058 | CNOT1   | 693_selected_genes |
| chr16 | 58610341 | 58610511 | CNOT1   | 693_selected_genes |
| chr16 | 58612577 | 58612868 | CNOT1   | 693_selected_genes |
| chr16 | 58614511 | 58614689 | CNOT1   | 693_selected_genes |
| chr16 | 58615223 | 58615444 | CNOT1   | 693_selected_genes |
| chr16 | 58616671 | 58616832 | CNOT1   | 693_selected_genes |
| chr16 | 58616934 | 58617111 | CNOT1   | 693_selected_genes |
| chr16 | 58619216 | 58619435 | CNOT1   | 693_selected_genes |
| chr16 | 58620423 | 58620677 | CNOT1   | 693_selected_genes |
| chr16 | 58621079 | 58621184 | CNOT1   | 693_selected_genes |
| chr16 | 58621223 | 58621342 | CNOT1   | 693_selected_genes |
| chr16 | 58621658 | 58621807 | CNOT1   | 693_selected_genes |
| chr16 | 58622677 | 58622835 | CNOT1   | 693_selected_genes |
| chr16 | 58633114 | 58633266 | CNOT1   | 693_selected_genes |
| chr17 | 40834822 | 40834939 | CNTNAP1 | 693_selected_genes |
| chr17 | 40835813 | 40835965 | CNTNAP1 | 693_selected_genes |
| chr17 | 40836028 | 40836272 | CNTNAP1 | 693_selected_genes |
| chr17 | 40836983 | 40837181 | CNTNAP1 | 693_selected_genes |
| chr17 | 40837209 | 40837463 | CNTNAP1 | 693_selected_genes |
| chr17 | 40837949 | 40838184 | CNTNAP1 | 693_selected_genes |
| chr17 | 40838895 | 40839089 | CNTNAP1 | 693_selected_genes |
| chr17 | 40839712 | 40840024 | CNTNAP1 | 693_selected_genes |
| chr17 | 40840454 | 40840654 | CNTNAP1 | 693_selected_genes |
| chr17 | 40840868 | 40841090 | CNTNAP1 | 693_selected_genes |
| chr17 | 40841513 | 40841670 | CNTNAP1 | 693_selected_genes |
| chr17 | 40842080 | 40842250 | CNTNAP1 | 693_selected_genes |
| chr17 | 40842731 | 40842985 | CNTNAP1 | 693_selected_genes |
| chr17 | 40843129 | 40843336 | CNTNAP1 | 693_selected_genes |
| chr17 | 40843376 | 40843554 | CNTNAP1 | 693_selected_genes |
| chr17 | 40843798 | 40844034 | CNTNAP1 | 693_selected_genes |
| chr17 | 40844491 | 40844763 | CNTNAP1 | 693_selected_genes |
| chr17 | 40845289 | 40845579 | CNTNAP1 | 693_selected_genes |
| chr17 | 40847513 | 40847917 | CNTNAP1 | 693_selected_genes |
| chr17 | 40848017 | 40848195 | CNTNAP1 | 693_selected_genes |
| chr17 | 40849266 | 40849410 | CNTNAP1 | 693_selected_genes |
| chr17 | 40849546 | 40849842 | CNTNAP1 | 693_selected_genes |
| chr17 | 40849895 | 40849993 | CNTNAP1 | 693_selected_genes |
| chr17 | 40850610 | 40850953 | CNTNAP1 | 693_selected_genes |
| chr17 | 48262837 | 48263034 | COL1A1  | 693_selected_genes |
| chr17 | 48263113 | 48263406 | COL1A1  | 693_selected_genes |
| chr17 | 48263652 | 48263893 | COL1A1  | 693_selected_genes |
| chr17 | 48263975 | 48264308 | COL1A1  | 693_selected_genes |
| chr17 | 48264350 | 48264508 | COL1A1  | 693_selected_genes |
| chr17 | 48264819 | 48264923 | COL1A1  | 693_selected_genes |
| chr17 | 48265211 | 48265369 | COL1A1  | 693_selected_genes |
| chr17 | 48265431 | 48265535 | COL1A1  | 693_selected_genes |
| chr17 | 48265865 | 48266023 | COL1A1  | 693_selected_genes |
| chr17 | 48266077 | 48266181 | COL1A1  | 693_selected_genes |
| chr17 | 48266238 | 48266396 | COL1A1  | 693_selected_genes |
| chr17 | 48266503 | 48266661 | COL1A1  | 693_selected_genes |
| chr17 | 48266712 | 48266924 | COL1A1  | 693_selected_genes |
| chr17 | 48267014 | 48267118 | COL1A1  | 693_selected_genes |
| chr17 | 48267194 | 48267298 | COL1A1  | 693_selected_genes |
| chr17 | 48267336 | 48267494 | COL1A1  | 693_selected_genes |
| chr17 | 48267662 | 48267766 | COL1A1  | 693_selected_genes |
| chr17 | 48267878 | 48267982 | COL1A1  | 693_selected_genes |
| chr17 | 48268152 | 48268310 | COL1A1  | 693_selected_genes |
| chr17 | 48268718 | 48268876 | COL1A1  | 693_selected_genes |

|       |           |           |        |                    |
|-------|-----------|-----------|--------|--------------------|
| chr17 | 48269123  | 48269272  | COL1A1 | 693_selected_genes |
| chr17 | 48269315  | 48269410  | COL1A1 | 693_selected_genes |
| chr17 | 48269810  | 48269914  | COL1A1 | 693_selected_genes |
| chr17 | 48269975  | 48270079  | COL1A1 | 693_selected_genes |
| chr17 | 48270132  | 48270236  | COL1A1 | 693_selected_genes |
| chr17 | 48270329  | 48270433  | COL1A1 | 693_selected_genes |
| chr17 | 48271278  | 48271427  | COL1A1 | 693_selected_genes |
| chr17 | 48271465  | 48271569  | COL1A1 | 693_selected_genes |
| chr17 | 48271684  | 48271833  | COL1A1 | 693_selected_genes |
| chr17 | 48271908  | 48272012  | COL1A1 | 693_selected_genes |
| chr17 | 48272056  | 48272214  | COL1A1 | 693_selected_genes |
| chr17 | 48272382  | 48272486  | COL1A1 | 693_selected_genes |
| chr17 | 48272567  | 48272716  | COL1A1 | 693_selected_genes |
| chr17 | 48272769  | 48272864  | COL1A1 | 693_selected_genes |
| chr17 | 48272902  | 48273051  | COL1A1 | 693_selected_genes |
| chr17 | 48273258  | 48273362  | COL1A1 | 693_selected_genes |
| chr17 | 48273490  | 48273585  | COL1A1 | 693_selected_genes |
| chr17 | 48273649  | 48273753  | COL1A1 | 693_selected_genes |
| chr17 | 48273819  | 48273914  | COL1A1 | 693_selected_genes |
| chr17 | 48273952  | 48274056  | COL1A1 | 693_selected_genes |
| chr17 | 48274345  | 48274449  | COL1A1 | 693_selected_genes |
| chr17 | 48274515  | 48274619  | COL1A1 | 693_selected_genes |
| chr17 | 48275067  | 48275171  | COL1A1 | 693_selected_genes |
| chr17 | 48275284  | 48275388  | COL1A1 | 693_selected_genes |
| chr17 | 48275496  | 48275591  | COL1A1 | 693_selected_genes |
| chr17 | 48275768  | 48275890  | COL1A1 | 693_selected_genes |
| chr17 | 48276561  | 48276713  | COL1A1 | 693_selected_genes |
| chr17 | 48276753  | 48276839  | COL1A1 | 693_selected_genes |
| chr17 | 48276891  | 48276976  | COL1A1 | 693_selected_genes |
| chr17 | 48277088  | 48277490  | COL1A1 | 693_selected_genes |
| chr17 | 48278746  | 48278899  | COL1A1 | 693_selected_genes |
| chr2  | 189839190 | 189839319 | COL3A1 | 693_selected_genes |
| chr2  | 189849460 | 189849713 | COL3A1 | 693_selected_genes |
| chr2  | 189849897 | 189849998 | COL3A1 | 693_selected_genes |
| chr2  | 189850365 | 189850529 | COL3A1 | 693_selected_genes |
| chr2  | 189851759 | 189851890 | COL3A1 | 693_selected_genes |
| chr2  | 189852781 | 189852885 | COL3A1 | 693_selected_genes |
| chr2  | 189853290 | 189853394 | COL3A1 | 693_selected_genes |
| chr2  | 189854096 | 189854200 | COL3A1 | 693_selected_genes |
| chr2  | 189854796 | 189854900 | COL3A1 | 693_selected_genes |
| chr2  | 189855007 | 189855111 | COL3A1 | 693_selected_genes |
| chr2  | 189855704 | 189855808 | COL3A1 | 693_selected_genes |
| chr2  | 189856187 | 189856282 | COL3A1 | 693_selected_genes |
| chr2  | 189856369 | 189856473 | COL3A1 | 693_selected_genes |
| chr2  | 189856884 | 189856979 | COL3A1 | 693_selected_genes |
| chr2  | 189857587 | 189857691 | COL3A1 | 693_selected_genes |
| chr2  | 189858061 | 189858210 | COL3A1 | 693_selected_genes |
| chr2  | 189858738 | 189858833 | COL3A1 | 693_selected_genes |
| chr2  | 189858934 | 189859083 | COL3A1 | 693_selected_genes |
| chr2  | 189859241 | 189859345 | COL3A1 | 693_selected_genes |
| chr2  | 189859424 | 189859582 | COL3A1 | 693_selected_genes |
| chr2  | 189859746 | 189859850 | COL3A1 | 693_selected_genes |
| chr2  | 189860392 | 189860541 | COL3A1 | 693_selected_genes |
| chr2  | 189860825 | 189860929 | COL3A1 | 693_selected_genes |
| chr2  | 189861098 | 189861247 | COL3A1 | 693_selected_genes |
| chr2  | 189861865 | 189861969 | COL3A1 | 693_selected_genes |
| chr2  | 189862036 | 189862140 | COL3A1 | 693_selected_genes |
| chr2  | 189862400 | 189862504 | COL3A1 | 693_selected_genes |
| chr2  | 189862966 | 189863070 | COL3A1 | 693_selected_genes |
| chr2  | 189863374 | 189863469 | COL3A1 | 693_selected_genes |
| chr2  | 189863985 | 189864134 | COL3A1 | 693_selected_genes |
| chr2  | 189864170 | 189864328 | COL3A1 | 693_selected_genes |
| chr2  | 189864542 | 189864646 | COL3A1 | 693_selected_genes |
| chr2  | 189866097 | 189866201 | COL3A1 | 693_selected_genes |
| chr2  | 189866236 | 189866340 | COL3A1 | 693_selected_genes |
| chr2  | 189866998 | 189867102 | COL3A1 | 693_selected_genes |
| chr2  | 189867655 | 189867813 | COL3A1 | 693_selected_genes |
| chr2  | 189868111 | 189868215 | COL3A1 | 693_selected_genes |
| chr2  | 189868434 | 189868538 | COL3A1 | 693_selected_genes |
| chr2  | 189868682 | 189868894 | COL3A1 | 693_selected_genes |
| chr2  | 189868957 | 189869115 | COL3A1 | 693_selected_genes |
| chr2  | 189870050 | 189870208 | COL3A1 | 693_selected_genes |
| chr2  | 189870325 | 189870380 | COL3A1 | 693_selected_genes |
| chr2  | 189870906 | 189871010 | COL3A1 | 693_selected_genes |
| chr2  | 189871045 | 189871203 | COL3A1 | 693_selected_genes |
| chr2  | 189871637 | 189871741 | COL3A1 | 693_selected_genes |
| chr2  | 189872200 | 189872358 | COL3A1 | 693_selected_genes |
| chr2  | 189872585 | 189872689 | COL3A1 | 693_selected_genes |
| chr2  | 189872735 | 189872893 | COL3A1 | 693_selected_genes |
| chr2  | 189873624 | 189873972 | COL3A1 | 693_selected_genes |
| chr2  | 189874878 | 189875116 | COL3A1 | 693_selected_genes |
| chr2  | 189875348 | 189875641 | COL3A1 | 693_selected_genes |
| chr2  | 189876328 | 189876525 | COL3A1 | 693_selected_genes |
| chr22 | 19950024  | 19950363  | COMT   | 693_selected_genes |

|       |           |           |        |                    |
|-------|-----------|-----------|--------|--------------------|
| chr22 | 19951063  | 19951307  | COMT   | 693_selected_genes |
| chr22 | 19951607  | 19951940  | COMT   | 693_selected_genes |
| chr22 | 19954661  | 19954975  | COMT   | 693_selected_genes |
| chr22 | 19956033  | 19956284  | COMT   | 693_selected_genes |
| chr3  | 3192523   | 3192754   | CRBN   | 693_selected_genes |
| chr3  | 3194114   | 3194296   | CRBN   | 693_selected_genes |
| chr3  | 3195082   | 3195197   | CRBN   | 693_selected_genes |
| chr3  | 3195618   | 3195784   | CRBN   | 693_selected_genes |
| chr3  | 3196405   | 3196540   | CRBN   | 693_selected_genes |
| chr3  | 3197877   | 3197990   | CRBN   | 693_selected_genes |
| chr3  | 3209280   | 3209502   | CRBN   | 693_selected_genes |
| chr3  | 3214434   | 3214634   | CRBN   | 693_selected_genes |
| chr3  | 3215717   | 3215970   | CRBN   | 693_selected_genes |
| chr3  | 3216821   | 3216978   | CRBN   | 693_selected_genes |
| chr3  | 3221279   | 3221396   | CRBN   | 693_selected_genes |
| chr2  | 208420334 | 208420498 | CREB1  | 693_selected_genes |
| chr2  | 208424924 | 208425121 | CREB1  | 693_selected_genes |
| chr2  | 208425817 | 208425909 | CREB1  | 693_selected_genes |
| chr2  | 208432161 | 208432312 | CREB1  | 693_selected_genes |
| chr2  | 208434877 | 208435070 | CREB1  | 693_selected_genes |
| chr2  | 208436432 | 208436517 | CREB1  | 693_selected_genes |
| chr2  | 208439970 | 208440203 | CREB1  | 693_selected_genes |
| chr2  | 208441329 | 208441396 | CREB1  | 693_selected_genes |
| chr2  | 208442203 | 208442507 | CREB1  | 693_selected_genes |
| chr2  | 208461612 | 208461807 | CREB1  | 693_selected_genes |
| chr16 | 3777693   | 3779900   | CREBBP | 693_selected_genes |
| chr16 | 3781167   | 3781499   | CREBBP | 693_selected_genes |
| chr16 | 3781751   | 3781963   | CREBBP | 693_selected_genes |
| chr16 | 3786011   | 3786229   | CREBBP | 693_selected_genes |
| chr16 | 3786625   | 3786841   | CREBBP | 693_selected_genes |
| chr16 | 3788534   | 3788698   | CREBBP | 693_selected_genes |
| chr16 | 3789549   | 3789750   | CREBBP | 693_selected_genes |
| chr16 | 3790374   | 3790575   | CREBBP | 693_selected_genes |
| chr16 | 3794869   | 3794987   | CREBBP | 693_selected_genes |
| chr16 | 3795252   | 3795380   | CREBBP | 693_selected_genes |
| chr16 | 3799602   | 3799709   | CREBBP | 693_selected_genes |
| chr16 | 3801701   | 3801834   | CREBBP | 693_selected_genes |
| chr16 | 3807263   | 3807402   | CREBBP | 693_selected_genes |
| chr16 | 3807784   | 3808074   | CREBBP | 693_selected_genes |
| chr16 | 3808829   | 3808998   | CREBBP | 693_selected_genes |
| chr16 | 3817695   | 3817935   | CREBBP | 693_selected_genes |
| chr16 | 3819149   | 3819379   | CREBBP | 693_selected_genes |
| chr16 | 3820545   | 3821012   | CREBBP | 693_selected_genes |
| chr16 | 3823693   | 3823956   | CREBBP | 693_selected_genes |
| chr16 | 3824544   | 3824719   | CREBBP | 693_selected_genes |
| chr16 | 3827588   | 3827683   | CREBBP | 693_selected_genes |
| chr16 | 3827986   | 3828208   | CREBBP | 693_selected_genes |
| chr16 | 3828675   | 3828843   | CREBBP | 693_selected_genes |
| chr16 | 3830707   | 3830904   | CREBBP | 693_selected_genes |
| chr16 | 3831179   | 3831332   | CREBBP | 693_selected_genes |
| chr16 | 3832659   | 3832952   | CREBBP | 693_selected_genes |
| chr16 | 3841956   | 3842120   | CREBBP | 693_selected_genes |
| chr16 | 3843361   | 3843652   | CREBBP | 693_selected_genes |
| chr16 | 3860578   | 3860805   | CREBBP | 693_selected_genes |
| chr16 | 3900272   | 3901035   | CREBBP | 693_selected_genes |
| chr16 | 3929807   | 3929942   | CREBBP | 693_selected_genes |
| chr22 | 21272197  | 21272558  | CRKL   | 693_selected_genes |
| chr22 | 21288041  | 21288557  | CRKL   | 693_selected_genes |
| chr22 | 21303973  | 21304158  | CRKL   | 693_selected_genes |
| chrY  | 1264864   | 1265039   | CRLF2  | 693_selected_genes |
| chrY  | 1267393   | 1267606   | CRLF2  | 693_selected_genes |
| chrY  | 1267764   | 1268033   | CRLF2  | 693_selected_genes |
| chrY  | 1271246   | 1271430   | CRLF2  | 693_selected_genes |
| chrY  | 1275300   | 1275517   | CRLF2  | 693_selected_genes |
| chrY  | 1277673   | 1277826   | CRLF2  | 693_selected_genes |
| chrY  | 1281423   | 1281552   | CRLF2  | 693_selected_genes |
| chrX  | 1314864   | 1315039   | CRLF2  | 693_selected_genes |
| chrX  | 1317393   | 1317606   | CRLF2  | 693_selected_genes |
| chrX  | 1317764   | 1318033   | CRLF2  | 693_selected_genes |
| chrX  | 1321246   | 1321430   | CRLF2  | 693_selected_genes |
| chrX  | 1325300   | 1325517   | CRLF2  | 693_selected_genes |
| chrX  | 1327673   | 1327826   | CRLF2  | 693_selected_genes |
| chrX  | 1331423   | 1331552   | CRLF2  | 693_selected_genes |
| chr19 | 18794487  | 18794663  | CRTC1  | 693_selected_genes |
| chr19 | 18846425  | 18846478  | CRTC1  | 693_selected_genes |
| chr19 | 18853694  | 18853861  | CRTC1  | 693_selected_genes |
| chr19 | 18854892  | 18854990  | CRTC1  | 693_selected_genes |
| chr19 | 18856607  | 18856795  | CRTC1  | 693_selected_genes |
| chr19 | 18857837  | 18857949  | CRTC1  | 693_selected_genes |
| chr19 | 18860565  | 18860710  | CRTC1  | 693_selected_genes |
| chr19 | 18864284  | 18864420  | CRTC1  | 693_selected_genes |
| chr19 | 18870335  | 18870426  | CRTC1  | 693_selected_genes |
| chr19 | 18870792  | 18871063  | CRTC1  | 693_selected_genes |
| chr19 | 18876188  | 18876363  | CRTC1  | 693_selected_genes |

|       |           |           |        |                    |
|-------|-----------|-----------|--------|--------------------|
| chr19 | 18879269  | 18879628  | CRTC1  | 693_selected_genes |
| chr19 | 18882226  | 18882381  | CRTC1  | 693_selected_genes |
| chr19 | 18885684  | 18885821  | CRTC1  | 693_selected_genes |
| chr19 | 18886425  | 18886656  | CRTC1  | 693_selected_genes |
| chr19 | 18887955  | 18888217  | CRTC1  | 693_selected_genes |
| chr15 | 91073278  | 91073460  | CRTC3  | 693_selected_genes |
| chr15 | 91083245  | 91083394  | CRTC3  | 693_selected_genes |
| chr15 | 91136842  | 91137012  | CRTC3  | 693_selected_genes |
| chr15 | 91141656  | 91141751  | CRTC3  | 693_selected_genes |
| chr15 | 91145530  | 91145642  | CRTC3  | 693_selected_genes |
| chr15 | 91147591  | 91147704  | CRTC3  | 693_selected_genes |
| chr15 | 91150584  | 91150735  | CRTC3  | 693_selected_genes |
| chr15 | 91157659  | 91157745  | CRTC3  | 693_selected_genes |
| chr15 | 91161089  | 91161225  | CRTC3  | 693_selected_genes |
| chr15 | 91162947  | 91163047  | CRTC3  | 693_selected_genes |
| chr15 | 91168982  | 91169250  | CRTC3  | 693_selected_genes |
| chr15 | 91172440  | 91172789  | CRTC3  | 693_selected_genes |
| chr15 | 91181652  | 91181903  | CRTC3  | 693_selected_genes |
| chr15 | 91181941  | 91182072  | CRTC3  | 693_selected_genes |
| chr15 | 91184303  | 91184456  | CRTC3  | 693_selected_genes |
| chr15 | 91185138  | 91185397  | CRTC3  | 693_selected_genes |
| chr1  | 115260764 | 115260862 | CSDE1  | 693_selected_genes |
| chr1  | 115261208 | 115261391 | CSDE1  | 693_selected_genes |
| chr1  | 115262174 | 115262388 | CSDE1  | 693_selected_genes |
| chr1  | 115263134 | 115263363 | CSDE1  | 693_selected_genes |
| chr1  | 115266478 | 115266648 | CSDE1  | 693_selected_genes |
| chr1  | 115267816 | 115267979 | CSDE1  | 693_selected_genes |
| chr1  | 115268806 | 115269032 | CSDE1  | 693_selected_genes |
| chr1  | 115269578 | 115269736 | CSDE1  | 693_selected_genes |
| chr1  | 115272853 | 115273068 | CSDE1  | 693_selected_genes |
| chr1  | 115273103 | 115273294 | CSDE1  | 693_selected_genes |
| chr1  | 115275199 | 115275462 | CSDE1  | 693_selected_genes |
| chr1  | 115276327 | 115276503 | CSDE1  | 693_selected_genes |
| chr1  | 115276584 | 115276763 | CSDE1  | 693_selected_genes |
| chr1  | 115277037 | 115277169 | CSDE1  | 693_selected_genes |
| chr1  | 115279353 | 115279501 | CSDE1  | 693_selected_genes |
| chr1  | 115280066 | 115280209 | CSDE1  | 693_selected_genes |
| chr1  | 115280558 | 115280718 | CSDE1  | 693_selected_genes |
| chr1  | 115282287 | 115282536 | CSDE1  | 693_selected_genes |
| chr1  | 115284122 | 115284310 | CSDE1  | 693_selected_genes |
| chr5  | 149433606 | 149433812 | CSF1R  | 693_selected_genes |
| chr5  | 149433859 | 149434018 | CSF1R  | 693_selected_genes |
| chr5  | 149434774 | 149434924 | CSF1R  | 693_selected_genes |
| chr5  | 149435563 | 149435725 | CSF1R  | 693_selected_genes |
| chr5  | 149435756 | 149435929 | CSF1R  | 693_selected_genes |
| chr5  | 149436824 | 149436972 | CSF1R  | 693_selected_genes |
| chr5  | 149437041 | 149437180 | CSF1R  | 693_selected_genes |
| chr5  | 149437798 | 149437859 | CSF1R  | 693_selected_genes |
| chr5  | 149439237 | 149439450 | CSF1R  | 693_selected_genes |
| chr5  | 149440399 | 149440560 | CSF1R  | 693_selected_genes |
| chr5  | 149441028 | 149441256 | CSF1R  | 693_selected_genes |
| chr5  | 149441260 | 149441437 | CSF1R  | 693_selected_genes |
| chr5  | 149447752 | 149447918 | CSF1R  | 693_selected_genes |
| chr5  | 149449410 | 149449651 | CSF1R  | 693_selected_genes |
| chr5  | 149449719 | 149449890 | CSF1R  | 693_selected_genes |
| chr5  | 149449993 | 149450159 | CSF1R  | 693_selected_genes |
| chr5  | 149452838 | 149453081 | CSF1R  | 693_selected_genes |
| chr5  | 149456813 | 149457023 | CSF1R  | 693_selected_genes |
| chr5  | 149457649 | 149457836 | CSF1R  | 693_selected_genes |
| chr5  | 149459589 | 149459924 | CSF1R  | 693_selected_genes |
| chr5  | 149460304 | 149460612 | CSF1R  | 693_selected_genes |
| chr5  | 149465916 | 149466015 | CSF1R  | 693_selected_genes |
| chr16 | 67644710  | 67645541  | CTCF   | 693_selected_genes |
| chr16 | 67645828  | 67646049  | CTCF   | 693_selected_genes |
| chr16 | 67650622  | 67650806  | CTCF   | 693_selected_genes |
| chr16 | 67654574  | 67654745  | CTCF   | 693_selected_genes |
| chr16 | 67655319  | 67655519  | CTCF   | 693_selected_genes |
| chr16 | 67660432  | 67660643  | CTCF   | 693_selected_genes |
| chr16 | 67662247  | 67662480  | CTCF   | 693_selected_genes |
| chr16 | 67663275  | 67663461  | CTCF   | 693_selected_genes |
| chr16 | 67670567  | 67670779  | CTCF   | 693_selected_genes |
| chr16 | 67671565  | 67671800  | CTCF   | 693_selected_genes |
| chr2  | 204732640 | 204732799 | CTLA4  | 693_selected_genes |
| chr2  | 204735283 | 204735681 | CTLA4  | 693_selected_genes |
| chr2  | 204736075 | 204736235 | CTLA4  | 693_selected_genes |
| chr2  | 204737405 | 204737560 | CTLA4  | 693_selected_genes |
| chr5  | 138117588 | 138117743 | CTNNA1 | 693_selected_genes |
| chr5  | 138117953 | 138118066 | CTNNA1 | 693_selected_genes |
| chr5  | 138118840 | 138119088 | CTNNA1 | 693_selected_genes |
| chr5  | 138145701 | 138145918 | CTNNA1 | 693_selected_genes |
| chr5  | 138147846 | 138148016 | CTNNA1 | 693_selected_genes |
| chr5  | 138160193 | 138160513 | CTNNA1 | 693_selected_genes |
| chr5  | 138163178 | 138163432 | CTNNA1 | 693_selected_genes |
| chr5  | 138216705 | 138216818 | CTNNA1 | 693_selected_genes |

|       |           |           |        |                    |
|-------|-----------|-----------|--------|--------------------|
| chr5  | 138221875 | 138222006 | CTNNA1 | 693_selected_genes |
| chr5  | 138223153 | 138223356 | CTNNA1 | 693_selected_genes |
| chr5  | 138240012 | 138240155 | CTNNA1 | 693_selected_genes |
| chr5  | 138253405 | 138253612 | CTNNA1 | 693_selected_genes |
| chr5  | 138260173 | 138260424 | CTNNA1 | 693_selected_genes |
| chr5  | 138260919 | 138261121 | CTNNA1 | 693_selected_genes |
| chr5  | 138264909 | 138265070 | CTNNA1 | 693_selected_genes |
| chr5  | 138266136 | 138266368 | CTNNA1 | 693_selected_genes |
| chr5  | 138266493 | 138266649 | CTNNA1 | 693_selected_genes |
| chr5  | 138268241 | 138268426 | CTNNA1 | 693_selected_genes |
| chr5  | 138268551 | 138268672 | CTNNA1 | 693_selected_genes |
| chr5  | 138269465 | 138269803 | CTNNA1 | 693_selected_genes |
| chr3  | 41265534  | 41265597  | CTNNB1 | 693_selected_genes |
| chr3  | 41265991  | 41266269  | CTNNB1 | 693_selected_genes |
| chr3  | 41266419  | 41266723  | CTNNB1 | 693_selected_genes |
| chr3  | 41266799  | 41267088  | CTNNB1 | 693_selected_genes |
| chr3  | 41267125  | 41267377  | CTNNB1 | 693_selected_genes |
| chr3  | 41268673  | 41268868  | CTNNB1 | 693_selected_genes |
| chr3  | 41274806  | 41274960  | CTNNB1 | 693_selected_genes |
| chr3  | 41274994  | 41275383  | CTNNB1 | 693_selected_genes |
| chr3  | 41275604  | 41275813  | CTNNB1 | 693_selected_genes |
| chr3  | 41277189  | 41277359  | CTNNB1 | 693_selected_genes |
| chr3  | 41277814  | 41278015  | CTNNB1 | 693_selected_genes |
| chr3  | 41278053  | 41278225  | CTNNB1 | 693_selected_genes |
| chr3  | 41279481  | 41279592  | CTNNB1 | 693_selected_genes |
| chr3  | 41280599  | 41280858  | CTNNB1 | 693_selected_genes |
| chr11 | 57558925  | 57559170  | CTNND1 | 693_selected_genes |
| chr11 | 57561456  | 57561578  | CTNND1 | 693_selected_genes |
| chr11 | 57563023  | 57563226  | CTNND1 | 693_selected_genes |
| chr11 | 57563903  | 57564489  | CTNND1 | 693_selected_genes |
| chr11 | 57569179  | 57569693  | CTNND1 | 693_selected_genes |
| chr11 | 57571067  | 57571301  | CTNND1 | 693_selected_genes |
| chr11 | 57572109  | 57572277  | CTNND1 | 693_selected_genes |
| chr11 | 57573328  | 57573532  | CTNND1 | 693_selected_genes |
| chr11 | 57573907  | 57573975  | CTNND1 | 693_selected_genes |
| chr11 | 57574361  | 57574480  | CTNND1 | 693_selected_genes |
| chr11 | 57575611  | 57575789  | CTNND1 | 693_selected_genes |
| chr11 | 57575836  | 57576037  | CTNND1 | 693_selected_genes |
| chr11 | 57576720  | 57576963  | CTNND1 | 693_selected_genes |
| chr11 | 57577555  | 57577720  | CTNND1 | 693_selected_genes |
| chr11 | 57578845  | 57578983  | CTNND1 | 693_selected_genes |
| chr11 | 57581757  | 57581870  | CTNND1 | 693_selected_genes |
| chr11 | 57582840  | 57583030  | CTNND1 | 693_selected_genes |
| chr11 | 57583361  | 57583498  | CTNND1 | 693_selected_genes |
| chr11 | 57583743  | 57583805  | CTNND1 | 693_selected_genes |
| chr11 | 70253378  | 70253515  | CTTN   | 693_selected_genes |
| chr11 | 70253598  | 70253722  | CTTN   | 693_selected_genes |
| chr11 | 70255911  | 70256091  | CTTN   | 693_selected_genes |
| chr11 | 70260622  | 70260783  | CTTN   | 693_selected_genes |
| chr11 | 70261743  | 70261848  | CTTN   | 693_selected_genes |
| chr11 | 70263093  | 70263254  | CTTN   | 693_selected_genes |
| chr11 | 70265826  | 70266034  | CTTN   | 693_selected_genes |
| chr11 | 70266480  | 70266641  | CTTN   | 693_selected_genes |
| chr11 | 70267550  | 70267711  | CTTN   | 693_selected_genes |
| chr11 | 70268583  | 70268723  | CTTN   | 693_selected_genes |
| chr11 | 70269020  | 70269126  | CTTN   | 693_selected_genes |
| chr11 | 70271412  | 70271532  | CTTN   | 693_selected_genes |
| chr11 | 70275131  | 70275330  | CTTN   | 693_selected_genes |
| chr11 | 70277271  | 70277411  | CTTN   | 693_selected_genes |
| chr11 | 70279181  | 70279409  | CTTN   | 693_selected_genes |
| chr11 | 70279705  | 70279849  | CTTN   | 693_selected_genes |
| chr11 | 70281106  | 70281293  | CTTN   | 693_selected_genes |
| chr11 | 70281546  | 70281879  | CTTN   | 693_selected_genes |
| chr11 | 70282362  | 70282539  | CTTN   | 693_selected_genes |
| chr7  | 148427189 | 148427379 | CUL1   | 693_selected_genes |
| chr7  | 148451042 | 148451267 | CUL1   | 693_selected_genes |
| chr7  | 148454049 | 148454267 | CUL1   | 693_selected_genes |
| chr7  | 148456370 | 148456471 | CUL1   | 693_selected_genes |
| chr7  | 148456614 | 148456755 | CUL1   | 693_selected_genes |
| chr7  | 148457399 | 148457613 | CUL1   | 693_selected_genes |
| chr7  | 148463627 | 148463840 | CUL1   | 693_selected_genes |
| chr7  | 148464685 | 148464866 | CUL1   | 693_selected_genes |
| chr7  | 148480849 | 148481007 | CUL1   | 693_selected_genes |
| chr7  | 148481037 | 148481194 | CUL1   | 693_selected_genes |
| chr7  | 148483617 | 148483716 | CUL1   | 693_selected_genes |
| chr7  | 148484055 | 148484237 | CUL1   | 693_selected_genes |
| chr7  | 148485623 | 148485791 | CUL1   | 693_selected_genes |
| chr7  | 148486816 | 148486943 | CUL1   | 693_selected_genes |
| chr7  | 148487376 | 148487558 | CUL1   | 693_selected_genes |
| chr7  | 148489792 | 148489935 | CUL1   | 693_selected_genes |
| chr7  | 148494878 | 148494976 | CUL1   | 693_selected_genes |
| chr7  | 148495003 | 148495136 | CUL1   | 693_selected_genes |
| chr7  | 148495638 | 148495794 | CUL1   | 693_selected_genes |
| chr7  | 148496341 | 148496505 | CUL1   | 693_selected_genes |

|       |           |           |       |                    |
|-------|-----------|-----------|-------|--------------------|
| chr7  | 148497568 | 148497699 | CUL1  | 693_selected_genes |
| chr13 | 113863916 | 113864114 | CUL4A | 693_selected_genes |
| chr13 | 113864261 | 113864427 | CUL4A | 693_selected_genes |
| chr13 | 113873233 | 113873387 | CUL4A | 693_selected_genes |
| chr13 | 113882264 | 113882384 | CUL4A | 693_selected_genes |
| chr13 | 113883734 | 113883858 | CUL4A | 693_selected_genes |
| chr13 | 113887441 | 113887678 | CUL4A | 693_selected_genes |
| chr13 | 113888185 | 113888325 | CUL4A | 693_selected_genes |
| chr13 | 113889351 | 113889484 | CUL4A | 693_selected_genes |
| chr13 | 113891111 | 113891229 | CUL4A | 693_selected_genes |
| chr13 | 113893721 | 113893890 | CUL4A | 693_selected_genes |
| chr13 | 113897256 | 113897499 | CUL4A | 693_selected_genes |
| chr13 | 113898698 | 113898853 | CUL4A | 693_selected_genes |
| chr13 | 113899237 | 113899398 | CUL4A | 693_selected_genes |
| chr13 | 113899440 | 113899576 | CUL4A | 693_selected_genes |
| chr13 | 113900244 | 113900402 | CUL4A | 693_selected_genes |
| chr13 | 113907370 | 113907534 | CUL4A | 693_selected_genes |
| chr13 | 113908981 | 113909137 | CUL4A | 693_selected_genes |
| chr13 | 113909241 | 113909464 | CUL4A | 693_selected_genes |
| chr13 | 113914895 | 113915098 | CUL4A | 693_selected_genes |
| chr13 | 113917775 | 113917921 | CUL4A | 693_selected_genes |
| chrX  | 119660590 | 119660736 | CUL4B | 693_selected_genes |
| chrX  | 119663931 | 119664134 | CUL4B | 693_selected_genes |
| chrX  | 119666251 | 119666474 | CUL4B | 693_selected_genes |
| chrX  | 119668310 | 119668466 | CUL4B | 693_selected_genes |
| chrX  | 119669659 | 119669823 | CUL4B | 693_selected_genes |
| chrX  | 119670756 | 119670914 | CUL4B | 693_selected_genes |
| chrX  | 119671953 | 119672089 | CUL4B | 693_selected_genes |
| chrX  | 119672489 | 119672650 | CUL4B | 693_selected_genes |
| chrX  | 119673097 | 119673252 | CUL4B | 693_selected_genes |
| chrX  | 119674199 | 119674442 | CUL4B | 693_selected_genes |
| chrX  | 119675431 | 119675600 | CUL4B | 693_selected_genes |
| chrX  | 119676795 | 119676913 | CUL4B | 693_selected_genes |
| chrX  | 119677556 | 119677689 | CUL4B | 693_selected_genes |
| chrX  | 119677943 | 119678083 | CUL4B | 693_selected_genes |
| chrX  | 119678310 | 119678523 | CUL4B | 693_selected_genes |
| chrX  | 119679273 | 119679397 | CUL4B | 693_selected_genes |
| chrX  | 119680376 | 119680496 | CUL4B | 693_selected_genes |
| chrX  | 119680965 | 119681119 | CUL4B | 693_selected_genes |
| chrX  | 119691753 | 119691919 | CUL4B | 693_selected_genes |
| chrX  | 119693608 | 119693680 | CUL4B | 693_selected_genes |
| chrX  | 119693912 | 119694518 | CUL4B | 693_selected_genes |
| chrX  | 119695201 | 119695279 | CUL4B | 693_selected_genes |
| chrX  | 119708380 | 119708497 | CUL4B | 693_selected_genes |
| chr7  | 101459285 | 101459398 | CUX1  | 693_selected_genes |
| chr7  | 101460894 | 101460974 | CUX1  | 693_selected_genes |
| chr7  | 101559369 | 101559530 | CUX1  | 693_selected_genes |
| chr7  | 101671352 | 101671450 | CUX1  | 693_selected_genes |
| chr7  | 101713593 | 101713722 | CUX1  | 693_selected_genes |
| chr7  | 101740618 | 101740806 | CUX1  | 693_selected_genes |
| chr7  | 101747590 | 101747764 | CUX1  | 693_selected_genes |
| chr7  | 101754952 | 101755079 | CUX1  | 693_selected_genes |
| chr7  | 101758461 | 101758578 | CUX1  | 693_selected_genes |
| chr7  | 101801814 | 101801913 | CUX1  | 693_selected_genes |
| chr7  | 101813700 | 101813855 | CUX1  | 693_selected_genes |
| chr7  | 101821723 | 101821962 | CUX1  | 693_selected_genes |
| chr7  | 101833067 | 101833176 | CUX1  | 693_selected_genes |
| chr7  | 101837096 | 101837195 | CUX1  | 693_selected_genes |
| chr7  | 101838761 | 101838908 | CUX1  | 693_selected_genes |
| chr7  | 101839888 | 101840610 | CUX1  | 693_selected_genes |
| chr7  | 101842056 | 101842172 | CUX1  | 693_selected_genes |
| chr7  | 101843325 | 101843477 | CUX1  | 693_selected_genes |
| chr7  | 101844614 | 101845509 | CUX1  | 693_selected_genes |
| chr7  | 101847645 | 101847861 | CUX1  | 693_selected_genes |
| chr7  | 101848368 | 101848475 | CUX1  | 693_selected_genes |
| chr7  | 101870621 | 101870974 | CUX1  | 693_selected_genes |
| chr7  | 101877306 | 101877545 | CUX1  | 693_selected_genes |
| chr7  | 101882574 | 101882889 | CUX1  | 693_selected_genes |
| chr7  | 101891666 | 101892347 | CUX1  | 693_selected_genes |
| chr7  | 101916611 | 101916789 | CUX1  | 693_selected_genes |
| chr7  | 101917419 | 101917606 | CUX1  | 693_selected_genes |
| chr7  | 101918492 | 101918655 | CUX1  | 693_selected_genes |
| chr7  | 101921194 | 101921361 | CUX1  | 693_selected_genes |
| chr7  | 101923303 | 101923437 | CUX1  | 693_selected_genes |
| chr7  | 101924070 | 101924177 | CUX1  | 693_selected_genes |
| chr7  | 101925106 | 101925237 | CUX1  | 693_selected_genes |
| chr7  | 101925978 | 101926093 | CUX1  | 693_selected_genes |
| chr7  | 101926287 | 101926407 | CUX1  | 693_selected_genes |
| chr16 | 50783584  | 50784138  | CYLD  | 693_selected_genes |
| chr16 | 50785489  | 50785842  | CYLD  | 693_selected_genes |
| chr16 | 50788204  | 50788401  | CYLD  | 693_selected_genes |
| chr16 | 50809051  | 50809110  | CYLD  | 693_selected_genes |
| chr16 | 50810055  | 50810213  | CYLD  | 693_selected_genes |
| chr16 | 50811710  | 50811877  | CYLD  | 693_selected_genes |

|       |           |           |         |                    |
|-------|-----------|-----------|---------|--------------------|
| chr16 | 50813550  | 50813980  | CYLD    | 693_selected_genes |
| chr16 | 50815131  | 50815347  | CYLD    | 693_selected_genes |
| chr16 | 50816210  | 50816402  | CYLD    | 693_selected_genes |
| chr16 | 50818214  | 50818387  | CYLD    | 693_selected_genes |
| chr16 | 50820740  | 50820882  | CYLD    | 693_selected_genes |
| chr16 | 50821671  | 50821788  | CYLD    | 693_selected_genes |
| chr16 | 50825443  | 50825626  | CYLD    | 693_selected_genes |
| chr16 | 50826482  | 50826641  | CYLD    | 693_selected_genes |
| chr16 | 50827431  | 50827600  | CYLD    | 693_selected_genes |
| chr16 | 50828097  | 50828414  | CYLD    | 693_selected_genes |
| chr16 | 50829433  | 50829539  | CYLD    | 693_selected_genes |
| chr16 | 50830209  | 50830444  | CYLD    | 693_selected_genes |
| chr16 | 50834705  | 50834778  | CYLD    | 693_selected_genes |
| chr10 | 104590433 | 104590767 | CYP17A1 | 693_selected_genes |
| chr10 | 104591239 | 104591393 | CYP17A1 | 693_selected_genes |
| chr10 | 104592242 | 104592462 | CYP17A1 | 693_selected_genes |
| chr10 | 104592724 | 104592990 | CYP17A1 | 693_selected_genes |
| chr10 | 104593767 | 104593904 | CYP17A1 | 693_selected_genes |
| chr10 | 104594516 | 104594796 | CYP17A1 | 693_selected_genes |
| chr10 | 104594985 | 104595174 | CYP17A1 | 693_selected_genes |
| chr10 | 104596796 | 104597143 | CYP17A1 | 693_selected_genes |
| chr2  | 38297839  | 38298478  | CYP1B1  | 693_selected_genes |
| chr2  | 38301463  | 38302556  | CYP1B1  | 693_selected_genes |
| chr10 | 96522437  | 96522655  | CYP2C19 | 693_selected_genes |
| chr10 | 96534789  | 96535002  | CYP2C19 | 693_selected_genes |
| chr10 | 96535121  | 96535321  | CYP2C19 | 693_selected_genes |
| chr10 | 96540230  | 96540441  | CYP2C19 | 693_selected_genes |
| chr10 | 96541552  | 96541779  | CYP2C19 | 693_selected_genes |
| chr10 | 96580227  | 96580419  | CYP2C19 | 693_selected_genes |
| chr10 | 96602568  | 96602806  | CYP2C19 | 693_selected_genes |
| chr10 | 96609648  | 96609840  | CYP2C19 | 693_selected_genes |
| chr10 | 96612464  | 96612696  | CYP2C19 | 693_selected_genes |
| chr10 | 96796859  | 96797091  | CYP2C8  | 693_selected_genes |
| chr10 | 96798628  | 96798820  | CYP2C8  | 693_selected_genes |
| chr10 | 96800659  | 96800742  | CYP2C8  | 693_selected_genes |
| chr10 | 96802621  | 96802859  | CYP2C8  | 693_selected_genes |
| chr10 | 96805541  | 96805733  | CYP2C8  | 693_selected_genes |
| chr10 | 96818066  | 96818293  | CYP2C8  | 693_selected_genes |
| chr10 | 96824531  | 96824742  | CYP2C8  | 693_selected_genes |
| chr10 | 96826939  | 96827212  | CYP2C8  | 693_selected_genes |
| chr10 | 96827260  | 96827473  | CYP2C8  | 693_selected_genes |
| chr10 | 96828928  | 96829184  | CYP2C8  | 693_selected_genes |
| chr10 | 96698414  | 96698632  | CYP2C9  | 693_selected_genes |
| chr10 | 96701589  | 96701802  | CYP2C9  | 693_selected_genes |
| chr10 | 96701923  | 96702123  | CYP2C9  | 693_selected_genes |
| chr10 | 96707510  | 96707721  | CYP2C9  | 693_selected_genes |
| chr10 | 96708839  | 96709066  | CYP2C9  | 693_selected_genes |
| chr10 | 96731835  | 96732027  | CYP2C9  | 693_selected_genes |
| chr10 | 96740914  | 96741152  | CYP2C9  | 693_selected_genes |
| chr10 | 96745764  | 96745956  | CYP2C9  | 693_selected_genes |
| chr10 | 96748578  | 96748810  | CYP2C9  | 693_selected_genes |
| chr22 | 42522550  | 42522779  | CYP2D6  | 693_selected_genes |
| chr22 | 42522827  | 42523019  | CYP2D6  | 693_selected_genes |
| chr22 | 42523423  | 42523661  | CYP2D6  | 693_selected_genes |
| chr22 | 42523818  | 42524010  | CYP2D6  | 693_selected_genes |
| chr22 | 42524150  | 42524377  | CYP2D6  | 693_selected_genes |
| chr22 | 42524760  | 42524971  | CYP2D6  | 693_selected_genes |
| chr22 | 42525009  | 42525212  | CYP2D6  | 693_selected_genes |
| chr22 | 42525357  | 42525416  | CYP2D6  | 693_selected_genes |
| chr22 | 42525713  | 42525939  | CYP2D6  | 693_selected_genes |
| chr22 | 42526588  | 42526818  | CYP2D6  | 693_selected_genes |
| chr7  | 99355730  | 99355876  | CYP3A4  | 693_selected_genes |
| chr7  | 99358416  | 99358629  | CYP3A4  | 693_selected_genes |
| chr7  | 99359638  | 99359915  | CYP3A4  | 693_selected_genes |
| chr7  | 99361452  | 99361663  | CYP3A4  | 693_selected_genes |
| chr7  | 99363974  | 99364091  | CYP3A4  | 693_selected_genes |
| chr7  | 99364728  | 99364906  | CYP3A4  | 693_selected_genes |
| chr7  | 99365951  | 99366150  | CYP3A4  | 693_selected_genes |
| chr7  | 99367365  | 99367504  | CYP3A4  | 693_selected_genes |
| chr7  | 99367719  | 99367883  | CYP3A4  | 693_selected_genes |
| chr7  | 99370187  | 99370337  | CYP3A4  | 693_selected_genes |
| chr7  | 99375625  | 99375728  | CYP3A4  | 693_selected_genes |
| chr7  | 99377589  | 99377772  | CYP3A4  | 693_selected_genes |
| chr7  | 99381608  | 99381729  | CYP3A4  | 693_selected_genes |
| chr7  | 99245902  | 99246048  | CYP3A5  | 693_selected_genes |
| chr7  | 99247670  | 99247880  | CYP3A5  | 693_selected_genes |
| chr7  | 99250150  | 99250427  | CYP3A5  | 693_selected_genes |
| chr7  | 99258096  | 99258307  | CYP3A5  | 693_selected_genes |
| chr7  | 99260413  | 99260530  | CYP3A5  | 693_selected_genes |
| chr7  | 99261565  | 99261743  | CYP3A5  | 693_selected_genes |
| chr7  | 99262763  | 99262962  | CYP3A5  | 693_selected_genes |
| chr7  | 99264198  | 99264337  | CYP3A5  | 693_selected_genes |
| chr7  | 99264549  | 99264713  | CYP3A5  | 693_selected_genes |
| chr7  | 99269371  | 99269526  | CYP3A5  | 693_selected_genes |

|       |           |           |         |                    |
|-------|-----------|-----------|---------|--------------------|
| chr7  | 99270177  | 99270327  | CYP3A5  | 693_selected_genes |
| chr7  | 99272130  | 99272233  | CYP3A5  | 693_selected_genes |
| chr7  | 99273712  | 99273856  | CYP3A5  | 693_selected_genes |
| chr7  | 99273914  | 99274005  | CYP3A5  | 693_selected_genes |
| chr7  | 99274125  | 99274224  | CYP3A5  | 693_selected_genes |
| chr7  | 99277423  | 99277544  | CYP3A5  | 693_selected_genes |
| chr6  | 33286494  | 33286604  | DAXX    | 693_selected_genes |
| chr6  | 33286748  | 33287021  | DAXX    | 693_selected_genes |
| chr6  | 33287131  | 33287656  | DAXX    | 693_selected_genes |
| chr6  | 33287762  | 33288026  | DAXX    | 693_selected_genes |
| chr6  | 33288131  | 33288393  | DAXX    | 693_selected_genes |
| chr6  | 33288487  | 33289369  | DAXX    | 693_selected_genes |
| chr6  | 33289470  | 33289727  | DAXX    | 693_selected_genes |
| chr6  | 33290613  | 33290716  | DAXX    | 693_selected_genes |
| chr3  | 182662856 | 182662986 | DCUN1D1 | 693_selected_genes |
| chr3  | 182665000 | 182665147 | DCUN1D1 | 693_selected_genes |
| chr3  | 182665312 | 182665445 | DCUN1D1 | 693_selected_genes |
| chr3  | 182678988 | 182679169 | DCUN1D1 | 693_selected_genes |
| chr3  | 182681643 | 182681862 | DCUN1D1 | 693_selected_genes |
| chr3  | 182683299 | 182683566 | DCUN1D1 | 693_selected_genes |
| chr3  | 182698249 | 182698302 | DCUN1D1 | 693_selected_genes |
| chr11 | 47236662  | 47236839  | DDB2    | 693_selected_genes |
| chr11 | 47237861  | 47238048  | DDB2    | 693_selected_genes |
| chr11 | 47238383  | 47238625  | DDB2    | 693_selected_genes |
| chr11 | 47254339  | 47254535  | DDB2    | 693_selected_genes |
| chr11 | 47256098  | 47256248  | DDB2    | 693_selected_genes |
| chr11 | 47256282  | 47256510  | DDB2    | 693_selected_genes |
| chr11 | 47256795  | 47256988  | DDB2    | 693_selected_genes |
| chr11 | 47259362  | 47259577  | DDB2    | 693_selected_genes |
| chr11 | 47259663  | 47259759  | DDB2    | 693_selected_genes |
| chr11 | 47260325  | 47260425  | DDB2    | 693_selected_genes |
| chr6  | 30852971  | 30853033  | DDR1    | 693_selected_genes |
| chr6  | 30853527  | 30853613  | DDR1    | 693_selected_genes |
| chr6  | 30856439  | 30856616  | DDR1    | 693_selected_genes |
| chr6  | 30856659  | 30856812  | DDR1    | 693_selected_genes |
| chr6  | 30856953  | 30857232  | DDR1    | 693_selected_genes |
| chr6  | 30858724  | 30858922  | DDR1    | 693_selected_genes |
| chr6  | 30859131  | 30859281  | DDR1    | 693_selected_genes |
| chr6  | 30859753  | 30859990  | DDR1    | 693_selected_genes |
| chr6  | 30860047  | 30860344  | DDR1    | 693_selected_genes |
| chr6  | 30860819  | 30860965  | DDR1    | 693_selected_genes |
| chr6  | 30861023  | 30861225  | DDR1    | 693_selected_genes |
| chr6  | 30862257  | 30862473  | DDR1    | 693_selected_genes |
| chr6  | 30863155  | 30863316  | DDR1    | 693_selected_genes |
| chr6  | 30864372  | 30864667  | DDR1    | 693_selected_genes |
| chr6  | 30864765  | 30864943  | DDR1    | 693_selected_genes |
| chr6  | 30865112  | 30865399  | DDR1    | 693_selected_genes |
| chr6  | 30865824  | 30866109  | DDR1    | 693_selected_genes |
| chr6  | 30866639  | 30867098  | DDR1    | 693_selected_genes |
| chr6  | 30867799  | 30867884  | DDR1    | 693_selected_genes |
| chr1  | 162688828 | 162688960 | DDR2    | 693_selected_genes |
| chr1  | 162722859 | 162723012 | DDR2    | 693_selected_genes |
| chr1  | 162724388 | 162724670 | DDR2    | 693_selected_genes |
| chr1  | 162724920 | 162725118 | DDR2    | 693_selected_genes |
| chr1  | 162725428 | 162725584 | DDR2    | 693_selected_genes |
| chr1  | 162729560 | 162729794 | DDR2    | 693_selected_genes |
| chr1  | 162730975 | 162731269 | DDR2    | 693_selected_genes |
| chr1  | 162735765 | 162735878 | DDR2    | 693_selected_genes |
| chr1  | 162736993 | 162737174 | DDR2    | 693_selected_genes |
| chr1  | 162740066 | 162740494 | DDR2    | 693_selected_genes |
| chr1  | 162741788 | 162742071 | DDR2    | 693_selected_genes |
| chr1  | 162743233 | 162743411 | DDR2    | 693_selected_genes |
| chr1  | 162745416 | 162745658 | DDR2    | 693_selected_genes |
| chr1  | 162745900 | 162746185 | DDR2    | 693_selected_genes |
| chr1  | 162748344 | 162748544 | DDR2    | 693_selected_genes |
| chr1  | 162749876 | 162750061 | DDR2    | 693_selected_genes |
| chrX  | 41193480  | 41193575  | DDX3X   | 693_selected_genes |
| chrX  | 41193820  | 41194047  | DDX3X   | 693_selected_genes |
| chrX  | 41196635  | 41196743  | DDX3X   | 693_selected_genes |
| chrX  | 41198263  | 41198361  | DDX3X   | 693_selected_genes |
| chrX  | 41200711  | 41200894  | DDX3X   | 693_selected_genes |
| chrX  | 41201722  | 41201931  | DDX3X   | 693_selected_genes |
| chrX  | 41201964  | 41202114  | DDX3X   | 693_selected_genes |
| chrX  | 41202443  | 41202629  | DDX3X   | 693_selected_genes |
| chrX  | 41202964  | 41203100  | DDX3X   | 693_selected_genes |
| chrX  | 41203257  | 41203406  | DDX3X   | 693_selected_genes |
| chrX  | 41203466  | 41203677  | DDX3X   | 693_selected_genes |
| chrX  | 41204407  | 41204602  | DDX3X   | 693_selected_genes |
| chrX  | 41204631  | 41204826  | DDX3X   | 693_selected_genes |
| chrX  | 41205456  | 41205688  | DDX3X   | 693_selected_genes |
| chrX  | 41205732  | 41205900  | DDX3X   | 693_selected_genes |
| chrX  | 41206086  | 41206290  | DDX3X   | 693_selected_genes |
| chrX  | 41206539  | 41206729  | DDX3X   | 693_selected_genes |
| chrX  | 41206867  | 41206997  | DDX3X   | 693_selected_genes |

|       |           |           |        |                    |
|-------|-----------|-----------|--------|--------------------|
| chr17 | 62496015  | 62496469  | DDX5   | 693_selected_genes |
| chr17 | 62496641  | 62496916  | DDX5   | 693_selected_genes |
| chr17 | 62498102  | 62498212  | DDX5   | 693_selected_genes |
| chr17 | 62498254  | 62498366  | DDX5   | 693_selected_genes |
| chr17 | 62498521  | 62498692  | DDX5   | 693_selected_genes |
| chr17 | 62499014  | 62499241  | DDX5   | 693_selected_genes |
| chr17 | 62499280  | 62499491  | DDX5   | 693_selected_genes |
| chr17 | 62499522  | 62499714  | DDX5   | 693_selected_genes |
| chr17 | 62499895  | 62500011  | DDX5   | 693_selected_genes |
| chr17 | 62500075  | 62500259  | DDX5   | 693_selected_genes |
| chr17 | 62500314  | 62500461  | DDX5   | 693_selected_genes |
| chr17 | 62500769  | 62500985  | DDX5   | 693_selected_genes |
| chr17 | 62501838  | 62501932  | DDX5   | 693_selected_genes |
| chr17 | 62502168  | 62502262  | DDX5   | 693_selected_genes |
| chr5  | 140896392 | 140896600 | DIAPH1 | 693_selected_genes |
| chr5  | 140898485 | 140898588 | DIAPH1 | 693_selected_genes |
| chr5  | 140903684 | 140903821 | DIAPH1 | 693_selected_genes |
| chr5  | 140905579 | 140905765 | DIAPH1 | 693_selected_genes |
| chr5  | 140905838 | 140906053 | DIAPH1 | 693_selected_genes |
| chr5  | 140907112 | 140907289 | DIAPH1 | 693_selected_genes |
| chr5  | 140907994 | 140908174 | DIAPH1 | 693_selected_genes |
| chr5  | 140908243 | 140908533 | DIAPH1 | 693_selected_genes |
| chr5  | 140908713 | 140908865 | DIAPH1 | 693_selected_genes |
| chr5  | 140909144 | 140909289 | DIAPH1 | 693_selected_genes |
| chr5  | 140913876 | 140914025 | DIAPH1 | 693_selected_genes |
| chr5  | 140915595 | 140915654 | DIAPH1 | 693_selected_genes |
| chr5  | 140940432 | 140940494 | DIAPH1 | 693_selected_genes |
| chr5  | 140950969 | 140951028 | DIAPH1 | 693_selected_genes |
| chr5  | 140951463 | 140951632 | DIAPH1 | 693_selected_genes |
| chr5  | 140953033 | 140953800 | DIAPH1 | 693_selected_genes |
| chr5  | 140954508 | 140954738 | DIAPH1 | 693_selected_genes |
| chr5  | 140955771 | 140955866 | DIAPH1 | 693_selected_genes |
| chr5  | 140956297 | 140956463 | DIAPH1 | 693_selected_genes |
| chr5  | 140957016 | 140957183 | DIAPH1 | 693_selected_genes |
| chr5  | 140957766 | 140957935 | DIAPH1 | 693_selected_genes |
| chr5  | 140958056 | 140958217 | DIAPH1 | 693_selected_genes |
| chr5  | 140958629 | 140958788 | DIAPH1 | 693_selected_genes |
| chr5  | 140960285 | 140960475 | DIAPH1 | 693_selected_genes |
| chr5  | 140961853 | 140961967 | DIAPH1 | 693_selected_genes |
| chr5  | 140962747 | 140962884 | DIAPH1 | 693_selected_genes |
| chr5  | 140963026 | 140963207 | DIAPH1 | 693_selected_genes |
| chr5  | 140963665 | 140963817 | DIAPH1 | 693_selected_genes |
| chr5  | 140966583 | 140966789 | DIAPH1 | 693_selected_genes |
| chr5  | 140967765 | 140967842 | DIAPH1 | 693_selected_genes |
| chr5  | 140998339 | 140998506 | DIAPH1 | 693_selected_genes |
| chr14 | 95556809  | 95557025  | DICER1 | 693_selected_genes |
| chr14 | 95557345  | 95557471  | DICER1 | 693_selected_genes |
| chr14 | 95557514  | 95557727  | DICER1 | 693_selected_genes |
| chr14 | 95560199  | 95560518  | DICER1 | 693_selected_genes |
| chr14 | 95562083  | 95563075  | DICER1 | 693_selected_genes |
| chr14 | 95566091  | 95566297  | DICER1 | 693_selected_genes |
| chr14 | 95569657  | 95570488  | DICER1 | 693_selected_genes |
| chr14 | 95571382  | 95571608  | DICER1 | 693_selected_genes |
| chr14 | 95571989  | 95572145  | DICER1 | 693_selected_genes |
| chr14 | 95572352  | 95572585  | DICER1 | 693_selected_genes |
| chr14 | 95573919  | 95574123  | DICER1 | 693_selected_genes |
| chr14 | 95574191  | 95574455  | DICER1 | 693_selected_genes |
| chr14 | 95574635  | 95574865  | DICER1 | 693_selected_genes |
| chr14 | 95577628  | 95577818  | DICER1 | 693_selected_genes |
| chr14 | 95578483  | 95578609  | DICER1 | 693_selected_genes |
| chr14 | 95579403  | 95579586  | DICER1 | 693_selected_genes |
| chr14 | 95581978  | 95582183  | DICER1 | 693_selected_genes |
| chr14 | 95582764  | 95583057  | DICER1 | 693_selected_genes |
| chr14 | 95583933  | 95584116  | DICER1 | 693_selected_genes |
| chr14 | 95590507  | 95591030  | DICER1 | 693_selected_genes |
| chr14 | 95592891  | 95593110  | DICER1 | 693_selected_genes |
| chr14 | 95595783  | 95595994  | DICER1 | 693_selected_genes |
| chr14 | 95596369  | 95596554  | DICER1 | 693_selected_genes |
| chr14 | 95597820  | 95598001  | DICER1 | 693_selected_genes |
| chr14 | 95598826  | 95599039  | DICER1 | 693_selected_genes |
| chr14 | 95599626  | 95599820  | DICER1 | 693_selected_genes |
| chr20 | 61510559  | 61513791  | DIDO1  | 693_selected_genes |
| chr20 | 61522257  | 61522532  | DIDO1  | 693_selected_genes |
| chr20 | 61523313  | 61523453  | DIDO1  | 693_selected_genes |
| chr20 | 61524135  | 61524339  | DIDO1  | 693_selected_genes |
| chr20 | 61524992  | 61525571  | DIDO1  | 693_selected_genes |
| chr20 | 61525739  | 61525925  | DIDO1  | 693_selected_genes |
| chr20 | 61526136  | 61526291  | DIDO1  | 693_selected_genes |
| chr20 | 61526375  | 61526542  | DIDO1  | 693_selected_genes |
| chr20 | 61527559  | 61527769  | DIDO1  | 693_selected_genes |
| chr20 | 61527857  | 61528373  | DIDO1  | 693_selected_genes |
| chr20 | 61536881  | 61536978  | DIDO1  | 693_selected_genes |
| chr20 | 61537112  | 61537477  | DIDO1  | 693_selected_genes |
| chr20 | 61538473  | 61538736  | DIDO1  | 693_selected_genes |

|       |          |          |       |                    |
|-------|----------|----------|-------|--------------------|
| chr20 | 61541025 | 61541397 | DIDO1 | 693_selected_genes |
| chr20 | 61542100 | 61542989 | DIDO1 | 693_selected_genes |
| chr13 | 73333907 | 73334041 | DIS3  | 693_selected_genes |
| chr13 | 73334641 | 73334814 | DIS3  | 693_selected_genes |
| chr13 | 73335475 | 73335684 | DIS3  | 693_selected_genes |
| chr13 | 73335758 | 73335977 | DIS3  | 693_selected_genes |
| chr13 | 73336035 | 73336300 | DIS3  | 693_selected_genes |
| chr13 | 73337563 | 73337770 | DIS3  | 693_selected_genes |
| chr13 | 73340084 | 73340221 | DIS3  | 693_selected_genes |
| chr13 | 73342897 | 73343075 | DIS3  | 693_selected_genes |
| chr13 | 73345016 | 73345151 | DIS3  | 693_selected_genes |
| chr13 | 73345193 | 73345308 | DIS3  | 693_selected_genes |
| chr13 | 73345907 | 73346059 | DIS3  | 693_selected_genes |
| chr13 | 73346271 | 73346438 | DIS3  | 693_selected_genes |
| chr13 | 73346805 | 73347002 | DIS3  | 693_selected_genes |
| chr13 | 73347796 | 73347984 | DIS3  | 693_selected_genes |
| chr13 | 73348058 | 73348222 | DIS3  | 693_selected_genes |
| chr13 | 73349323 | 73349538 | DIS3  | 693_selected_genes |
| chr13 | 73350037 | 73350255 | DIS3  | 693_selected_genes |
| chr13 | 73351532 | 73351656 | DIS3  | 693_selected_genes |
| chr13 | 73352299 | 73352543 | DIS3  | 693_selected_genes |
| chr13 | 73354958 | 73355166 | DIS3  | 693_selected_genes |
| chr13 | 73355401 | 73355519 | DIS3  | 693_selected_genes |
| chr13 | 73355717 | 73355995 | DIS3  | 693_selected_genes |
| chrX  | 31139924 | 31140072 | DMD   | 693_selected_genes |
| chrX  | 31144733 | 31144845 | DMD   | 693_selected_genes |
| chrX  | 31152193 | 31152336 | DMD   | 693_selected_genes |
| chrX  | 31164382 | 31164556 | DMD   | 693_selected_genes |
| chrX  | 31165366 | 31165660 | DMD   | 693_selected_genes |
| chrX  | 31187534 | 31187743 | DMD   | 693_selected_genes |
| chrX  | 31190439 | 31190555 | DMD   | 693_selected_genes |
| chrX  | 31191630 | 31191746 | DMD   | 693_selected_genes |
| chrX  | 31196023 | 31196112 | DMD   | 693_selected_genes |
| chrX  | 31196756 | 31196947 | DMD   | 693_selected_genes |
| chrX  | 31198461 | 31198623 | DMD   | 693_selected_genes |
| chrX  | 31200829 | 31201046 | DMD   | 693_selected_genes |
| chrX  | 31222052 | 31222260 | DMD   | 693_selected_genes |
| chrX  | 31224673 | 31224809 | DMD   | 693_selected_genes |
| chrX  | 31227589 | 31227841 | DMD   | 693_selected_genes |
| chrX  | 31241138 | 31241263 | DMD   | 693_selected_genes |
| chrX  | 31279046 | 31279158 | DMD   | 693_selected_genes |
| chrX  | 31284901 | 31284971 | DMD   | 693_selected_genes |
| chrX  | 31341689 | 31341800 | DMD   | 693_selected_genes |
| chrX  | 31366647 | 31366776 | DMD   | 693_selected_genes |
| chrX  | 31462572 | 31462769 | DMD   | 693_selected_genes |
| chrX  | 31496197 | 31496516 | DMD   | 693_selected_genes |
| chrX  | 31497074 | 31497245 | DMD   | 693_selected_genes |
| chrX  | 31514879 | 31515086 | DMD   | 693_selected_genes |
| chrX  | 31525372 | 31525595 | DMD   | 693_selected_genes |
| chrX  | 31526299 | 31526379 | DMD   | 693_selected_genes |
| chrX  | 31645764 | 31646004 | DMD   | 693_selected_genes |
| chrX  | 31676081 | 31676286 | DMD   | 693_selected_genes |
| chrX  | 31697466 | 31697728 | DMD   | 693_selected_genes |
| chrX  | 31747722 | 31747890 | DMD   | 693_selected_genes |
| chrX  | 31792051 | 31792334 | DMD   | 693_selected_genes |
| chrX  | 31838066 | 31838225 | DMD   | 693_selected_genes |
| chrX  | 31854809 | 31854964 | DMD   | 693_selected_genes |
| chrX  | 31893279 | 31893515 | DMD   | 693_selected_genes |
| chrX  | 31947687 | 31947887 | DMD   | 693_selected_genes |
| chrX  | 31950171 | 31950369 | DMD   | 693_selected_genes |
| chrX  | 31986430 | 31986656 | DMD   | 693_selected_genes |
| chrX  | 32235007 | 32235205 | DMD   | 693_selected_genes |
| chrX  | 32305620 | 32305843 | DMD   | 693_selected_genes |
| chrX  | 32328173 | 32328418 | DMD   | 693_selected_genes |
| chrX  | 32360191 | 32360424 | DMD   | 693_selected_genes |
| chrX  | 32360933 | 32360992 | DMD   | 693_selected_genes |
| chrX  | 32361225 | 32361428 | DMD   | 693_selected_genes |
| chrX  | 32364034 | 32364222 | DMD   | 693_selected_genes |
| chrX  | 32366497 | 32366670 | DMD   | 693_selected_genes |
| chrX  | 32380879 | 32381100 | DMD   | 693_selected_genes |
| chrX  | 32382673 | 32382852 | DMD   | 693_selected_genes |
| chrX  | 32383111 | 32383341 | DMD   | 693_selected_genes |
| chrX  | 32398601 | 32398822 | DMD   | 693_selected_genes |
| chrX  | 32404401 | 32404607 | DMD   | 693_selected_genes |
| chrX  | 32407592 | 32407816 | DMD   | 693_selected_genes |
| chrX  | 32408162 | 32408323 | DMD   | 693_selected_genes |
| chrX  | 32429843 | 32430055 | DMD   | 693_selected_genes |
| chrX  | 32430110 | 32430199 | DMD   | 693_selected_genes |
| chrX  | 32430253 | 32430351 | DMD   | 693_selected_genes |
| chrX  | 32456332 | 32456532 | DMD   | 693_selected_genes |
| chrX  | 32459271 | 32459456 | DMD   | 693_selected_genes |
| chrX  | 32466547 | 32466780 | DMD   | 693_selected_genes |
| chrX  | 32472753 | 32472974 | DMD   | 693_selected_genes |
| chrX  | 32481530 | 32481736 | DMD   | 693_selected_genes |

|       |          |          |        |                    |
|-------|----------|----------|--------|--------------------|
| chrX  | 32482677 | 32482841 | DMD    | 693_selected_genes |
| chrX  | 32486589 | 32486852 | DMD    | 693_selected_genes |
| chrX  | 32490255 | 32490451 | DMD    | 693_selected_genes |
| chrX  | 32503010 | 32503241 | DMD    | 693_selected_genes |
| chrX  | 32509368 | 32509660 | DMD    | 693_selected_genes |
| chrX  | 32519846 | 32519984 | DMD    | 693_selected_genes |
| chrX  | 32536048 | 32536273 | DMD    | 693_selected_genes |
| chrX  | 32563250 | 32563476 | DMD    | 693_selected_genes |
| chrX  | 32583793 | 32584023 | DMD    | 693_selected_genes |
| chrX  | 32591621 | 32591779 | DMD    | 693_selected_genes |
| chrX  | 32591836 | 32591988 | DMD    | 693_selected_genes |
| chrX  | 32613848 | 32614018 | DMD    | 693_selected_genes |
| chrX  | 32632394 | 32632595 | DMD    | 693_selected_genes |
| chrX  | 32662223 | 32662455 | DMD    | 693_selected_genes |
| chrX  | 32663055 | 32663294 | DMD    | 693_selected_genes |
| chrX  | 32715961 | 32716140 | DMD    | 693_selected_genes |
| chrX  | 32717203 | 32717435 | DMD    | 693_selected_genes |
| chrX  | 32827584 | 32827753 | DMD    | 693_selected_genes |
| chrX  | 32834559 | 32834782 | DMD    | 693_selected_genes |
| chrX  | 32841386 | 32841529 | DMD    | 693_selected_genes |
| chrX  | 32862874 | 32863002 | DMD    | 693_selected_genes |
| chrX  | 32867819 | 32867962 | DMD    | 693_selected_genes |
| chrX  | 33038230 | 33038342 | DMD    | 693_selected_genes |
| chrX  | 33146238 | 33146307 | DMD    | 693_selected_genes |
| chrX  | 33229373 | 33229454 | DMD    | 693_selected_genes |
| chrX  | 33357350 | 33357407 | DMD    | 693_selected_genes |
| chr19 | 10244317 | 10244402 | DNMT1  | 693_selected_genes |
| chr19 | 10244867 | 10245008 | DNMT1  | 693_selected_genes |
| chr19 | 10246269 | 10246553 | DNMT1  | 693_selected_genes |
| chr19 | 10246771 | 10246988 | DNMT1  | 693_selected_genes |
| chr19 | 10247726 | 10247981 | DNMT1  | 693_selected_genes |
| chr19 | 10248482 | 10248710 | DNMT1  | 693_selected_genes |
| chr19 | 10249089 | 10249306 | DNMT1  | 693_selected_genes |
| chr19 | 10250326 | 10250518 | DNMT1  | 693_selected_genes |
| chr19 | 10250696 | 10251029 | DNMT1  | 693_selected_genes |
| chr19 | 10251431 | 10251610 | DNMT1  | 693_selected_genes |
| chr19 | 10251755 | 10251890 | DNMT1  | 693_selected_genes |
| chr19 | 10252678 | 10252921 | DNMT1  | 693_selected_genes |
| chr19 | 10254416 | 10254688 | DNMT1  | 693_selected_genes |
| chr19 | 10257001 | 10257225 | DNMT1  | 693_selected_genes |
| chr19 | 10259534 | 10259718 | DNMT1  | 693_selected_genes |
| chr19 | 10260103 | 10260358 | DNMT1  | 693_selected_genes |
| chr19 | 10260503 | 10260669 | DNMT1  | 693_selected_genes |
| chr19 | 10262048 | 10262246 | DNMT1  | 693_selected_genes |
| chr19 | 10262400 | 10262548 | DNMT1  | 693_selected_genes |
| chr19 | 10264943 | 10265180 | DNMT1  | 693_selected_genes |
| chr19 | 10265236 | 10265474 | DNMT1  | 693_selected_genes |
| chr19 | 10265555 | 10265757 | DNMT1  | 693_selected_genes |
| chr19 | 10266503 | 10266646 | DNMT1  | 693_selected_genes |
| chr19 | 10267041 | 10267210 | DNMT1  | 693_selected_genes |
| chr19 | 10270308 | 10270468 | DNMT1  | 693_selected_genes |
| chr19 | 10270492 | 10270623 | DNMT1  | 693_selected_genes |
| chr19 | 10270668 | 10270764 | DNMT1  | 693_selected_genes |
| chr19 | 10271034 | 10271119 | DNMT1  | 693_selected_genes |
| chr19 | 10273317 | 10273449 | DNMT1  | 693_selected_genes |
| chr19 | 10273976 | 10274061 | DNMT1  | 693_selected_genes |
| chr19 | 10277248 | 10277386 | DNMT1  | 693_selected_genes |
| chr19 | 10278980 | 10279065 | DNMT1  | 693_selected_genes |
| chr19 | 10283740 | 10283875 | DNMT1  | 693_selected_genes |
| chr19 | 10284521 | 10284606 | DNMT1  | 693_selected_genes |
| chr19 | 10286190 | 10286319 | DNMT1  | 693_selected_genes |
| chr19 | 10287942 | 10288068 | DNMT1  | 693_selected_genes |
| chr19 | 10290531 | 10290683 | DNMT1  | 693_selected_genes |
| chr19 | 10290837 | 10290935 | DNMT1  | 693_selected_genes |
| chr19 | 10291000 | 10291270 | DNMT1  | 693_selected_genes |
| chr19 | 10291428 | 10291586 | DNMT1  | 693_selected_genes |
| chr19 | 10292691 | 10292778 | DNMT1  | 693_selected_genes |
| chr19 | 10305470 | 10305755 | DNMT1  | 693_selected_genes |
| chr19 | 10311524 | 10311584 | DNMT1  | 693_selected_genes |
| chr2  | 25457122 | 25457314 | DNMT3A | 693_selected_genes |
| chr2  | 25458550 | 25458719 | DNMT3A | 693_selected_genes |
| chr2  | 25459779 | 25459899 | DNMT3A | 693_selected_genes |
| chr2  | 25461973 | 25462109 | DNMT3A | 693_selected_genes |
| chr2  | 25462333 | 25462407 | DNMT3A | 693_selected_genes |
| chr2  | 25463145 | 25463344 | DNMT3A | 693_selected_genes |
| chr2  | 25463483 | 25463624 | DNMT3A | 693_selected_genes |
| chr2  | 25464405 | 25464601 | DNMT3A | 693_selected_genes |
| chr2  | 25466741 | 25466876 | DNMT3A | 693_selected_genes |
| chr2  | 25466998 | 25467232 | DNMT3A | 693_selected_genes |
| chr2  | 25467383 | 25467546 | DNMT3A | 693_selected_genes |
| chr2  | 25468096 | 25468226 | DNMT3A | 693_selected_genes |
| chr2  | 25468863 | 25468958 | DNMT3A | 693_selected_genes |
| chr2  | 25469003 | 25469203 | DNMT3A | 693_selected_genes |
| chr2  | 25469463 | 25469670 | DNMT3A | 693_selected_genes |

|       |          |          |        |                    |
|-------|----------|----------|--------|--------------------|
| chr2  | 25469894 | 25470052 | DNMT3A | 693_selected_genes |
| chr2  | 25470434 | 25470643 | DNMT3A | 693_selected_genes |
| chr2  | 25470880 | 25471146 | DNMT3A | 693_selected_genes |
| chr2  | 25472500 | 25472618 | DNMT3A | 693_selected_genes |
| chr2  | 25475037 | 25475091 | DNMT3A | 693_selected_genes |
| chr2  | 25497784 | 25497981 | DNMT3A | 693_selected_genes |
| chr2  | 25498343 | 25498437 | DNMT3A | 693_selected_genes |
| chr2  | 25505231 | 25505605 | DNMT3A | 693_selected_genes |
| chr2  | 25522982 | 25523137 | DNMT3A | 693_selected_genes |
| chr2  | 25536756 | 25536878 | DNMT3A | 693_selected_genes |
| chr20 | 31367896 | 31367976 | DNMT3B | 693_selected_genes |
| chr20 | 31368098 | 31368296 | DNMT3B | 693_selected_genes |
| chr20 | 31369133 | 31369245 | DNMT3B | 693_selected_genes |
| chr20 | 31372538 | 31372690 | DNMT3B | 693_selected_genes |
| chr20 | 31374282 | 31374458 | DNMT3B | 693_selected_genes |
| chr20 | 31375010 | 31375282 | DNMT3B | 693_selected_genes |
| chr20 | 31376634 | 31376843 | DNMT3B | 693_selected_genes |
| chr20 | 31379381 | 31379539 | DNMT3B | 693_selected_genes |
| chr20 | 31380406 | 31380601 | DNMT3B | 693_selected_genes |
| chr20 | 31381316 | 31381426 | DNMT3B | 693_selected_genes |
| chr20 | 31383189 | 31383365 | DNMT3B | 693_selected_genes |
| chr20 | 31383430 | 31383525 | DNMT3B | 693_selected_genes |
| chr20 | 31384570 | 31384700 | DNMT3B | 693_selected_genes |
| chr20 | 31384967 | 31385130 | DNMT3B | 693_selected_genes |
| chr20 | 31386240 | 31386474 | DNMT3B | 693_selected_genes |
| chr20 | 31387024 | 31387159 | DNMT3B | 693_selected_genes |
| chr20 | 31387933 | 31388129 | DNMT3B | 693_selected_genes |
| chr20 | 31388615 | 31388756 | DNMT3B | 693_selected_genes |
| chr20 | 31389058 | 31389257 | DNMT3B | 693_selected_genes |
| chr20 | 31390165 | 31390301 | DNMT3B | 693_selected_genes |
| chr20 | 31393118 | 31393238 | DNMT3B | 693_selected_genes |
| chr20 | 31393989 | 31394158 | DNMT3B | 693_selected_genes |
| chr20 | 31395542 | 31395734 | DNMT3B | 693_selected_genes |
| chr19 | 2164158  | 2164289  | DOT1L  | 693_selected_genes |
| chr19 | 2180686  | 2180780  | DOT1L  | 693_selected_genes |
| chr19 | 2185828  | 2185953  | DOT1L  | 693_selected_genes |
| chr19 | 2189705  | 2189819  | DOT1L  | 693_selected_genes |
| chr19 | 2190985  | 2191264  | DOT1L  | 693_selected_genes |
| chr19 | 2193662  | 2193807  | DOT1L  | 693_selected_genes |
| chr19 | 2194488  | 2194601  | DOT1L  | 693_selected_genes |
| chr19 | 2199857  | 2199963  | DOT1L  | 693_selected_genes |
| chr19 | 2202673  | 2202803  | DOT1L  | 693_selected_genes |
| chr19 | 2206702  | 2206821  | DOT1L  | 693_selected_genes |
| chr19 | 2207547  | 2207704  | DOT1L  | 693_selected_genes |
| chr19 | 2208908  | 2209000  | DOT1L  | 693_selected_genes |
| chr19 | 2210373  | 2210534  | DOT1L  | 693_selected_genes |
| chr19 | 2210594  | 2210879  | DOT1L  | 693_selected_genes |
| chr19 | 2211072  | 2211236  | DOT1L  | 693_selected_genes |
| chr19 | 2211724  | 2211866  | DOT1L  | 693_selected_genes |
| chr19 | 2213512  | 2213664  | DOT1L  | 693_selected_genes |
| chr19 | 2213822  | 2214010  | DOT1L  | 693_selected_genes |
| chr19 | 2214444  | 2214620  | DOT1L  | 693_selected_genes |
| chr19 | 2215431  | 2215595  | DOT1L  | 693_selected_genes |
| chr19 | 2216254  | 2216789  | DOT1L  | 693_selected_genes |
| chr19 | 2216928  | 2217114  | DOT1L  | 693_selected_genes |
| chr19 | 2217745  | 2217942  | DOT1L  | 693_selected_genes |
| chr19 | 2220081  | 2220246  | DOT1L  | 693_selected_genes |
| chr19 | 2221949  | 2222583  | DOT1L  | 693_selected_genes |
| chr19 | 2223254  | 2223510  | DOT1L  | 693_selected_genes |
| chr19 | 2225361  | 2225476  | DOT1L  | 693_selected_genes |
| chr19 | 2226156  | 2227151  | DOT1L  | 693_selected_genes |
| chr19 | 2227336  | 2227491  | DOT1L  | 693_selected_genes |
| chr19 | 2227710  | 2228371  | DOT1L  | 693_selected_genes |
| chr19 | 2229758  | 2229816  | DOT1L  | 693_selected_genes |
| chr1  | 97544506 | 97544727 | DPYD   | 693_selected_genes |
| chr1  | 97547860 | 97548051 | DPYD   | 693_selected_genes |
| chr1  | 97564019 | 97564213 | DPYD   | 693_selected_genes |
| chr1  | 97658599 | 97658829 | DPYD   | 693_selected_genes |
| chr1  | 97700382 | 97700575 | DPYD   | 693_selected_genes |
| chr1  | 97770789 | 97770959 | DPYD   | 693_selected_genes |
| chr1  | 97771707 | 97771878 | DPYD   | 693_selected_genes |
| chr1  | 97839091 | 97839225 | DPYD   | 693_selected_genes |
| chr1  | 97847923 | 97848042 | DPYD   | 693_selected_genes |
| chr1  | 97915589 | 97915804 | DPYD   | 693_selected_genes |
| chr1  | 97981256 | 97981522 | DPYD   | 693_selected_genes |
| chr1  | 98015090 | 98015325 | DPYD   | 693_selected_genes |
| chr1  | 98039290 | 98039551 | DPYD   | 693_selected_genes |
| chr1  | 98058748 | 98058968 | DPYD   | 693_selected_genes |
| chr1  | 98060589 | 98060747 | DPYD   | 693_selected_genes |
| chr1  | 98144625 | 98144763 | DPYD   | 693_selected_genes |
| chr1  | 98157247 | 98157379 | DPYD   | 693_selected_genes |
| chr1  | 98164881 | 98165128 | DPYD   | 693_selected_genes |
| chr1  | 98165734 | 98165883 | DPYD   | 693_selected_genes |
| chr1  | 98186418 | 98186507 | DPYD   | 693_selected_genes |

|       |           |           |        |                    |
|-------|-----------|-----------|--------|--------------------|
| chr1  | 98187040  | 98187252  | DPYD   | 693_selected_genes |
| chr1  | 98205922  | 98206060  | DPYD   | 693_selected_genes |
| chr1  | 98293644  | 98293777  | DPYD   | 693_selected_genes |
| chr1  | 98348794  | 98348955  | DPYD   | 693_selected_genes |
| chr1  | 98386414  | 98386503  | DPYD   | 693_selected_genes |
| chr6  | 20402438  | 20402881  | E2F3   | 693_selected_genes |
| chr6  | 20404020  | 20404088  | E2F3   | 693_selected_genes |
| chr6  | 20480051  | 20480213  | E2F3   | 693_selected_genes |
| chr6  | 20481411  | 20481681  | E2F3   | 693_selected_genes |
| chr6  | 20482967  | 20483176  | E2F3   | 693_selected_genes |
| chr6  | 20486894  | 20487059  | E2F3   | 693_selected_genes |
| chr6  | 20488318  | 20488504  | E2F3   | 693_selected_genes |
| chr6  | 20490373  | 20490686  | E2F3   | 693_selected_genes |
| chr11 | 85956246  | 85956410  | EED    | 693_selected_genes |
| chr11 | 85961312  | 85961515  | EED    | 693_selected_genes |
| chr11 | 85963164  | 85963307  | EED    | 693_selected_genes |
| chr11 | 85966238  | 85966354  | EED    | 693_selected_genes |
| chr11 | 85967403  | 85967579  | EED    | 693_selected_genes |
| chr11 | 85968531  | 85968663  | EED    | 693_selected_genes |
| chr11 | 85975188  | 85975330  | EED    | 693_selected_genes |
| chr11 | 85977099  | 85977283  | EED    | 693_selected_genes |
| chr11 | 85979472  | 85979628  | EED    | 693_selected_genes |
| chr11 | 85981099  | 85981224  | EED    | 693_selected_genes |
| chr11 | 85987996  | 85988205  | EED    | 693_selected_genes |
| chr11 | 85988934  | 85989062  | EED    | 693_selected_genes |
| chr11 | 85989415  | 85989592  | EED    | 693_selected_genes |
| chr6  | 74227507  | 74227682  | EEF1A1 | 693_selected_genes |
| chr6  | 74227727  | 74228012  | EEF1A1 | 693_selected_genes |
| chr6  | 74228051  | 74228358  | EEF1A1 | 693_selected_genes |
| chr6  | 74228395  | 74228596  | EEF1A1 | 693_selected_genes |
| chr6  | 74228629  | 74228976  | EEF1A1 | 693_selected_genes |
| chr6  | 74229034  | 74229264  | EEF1A1 | 693_selected_genes |
| chr6  | 74229580  | 74229774  | EEF1A1 | 693_selected_genes |
| chr9  | 139562709 | 139562839 | EGFL7  | 693_selected_genes |
| chr9  | 139562983 | 139563150 | EGFL7  | 693_selected_genes |
| chr9  | 139564032 | 139564198 | EGFL7  | 693_selected_genes |
| chr9  | 139564340 | 139564486 | EGFL7  | 693_selected_genes |
| chr9  | 139564595 | 139564807 | EGFL7  | 693_selected_genes |
| chr9  | 139565376 | 139565491 | EGFL7  | 693_selected_genes |
| chr9  | 139566352 | 139566565 | EGFL7  | 693_selected_genes |
| chr9  | 139566690 | 139566763 | EGFL7  | 693_selected_genes |
| chr7  | 55086945  | 55087083  | EGFR   | 693_selected_genes |
| chr7  | 55209953  | 55210155  | EGFR   | 693_selected_genes |
| chr7  | 55210972  | 55211206  | EGFR   | 693_selected_genes |
| chr7  | 55214273  | 55214458  | EGFR   | 693_selected_genes |
| chr7  | 55218961  | 55219080  | EGFR   | 693_selected_genes |
| chr7  | 55220213  | 55220382  | EGFR   | 693_selected_genes |
| chr7  | 55221678  | 55221870  | EGFR   | 693_selected_genes |
| chr7  | 55223497  | 55223664  | EGFR   | 693_selected_genes |
| chr7  | 55224200  | 55224377  | EGFR   | 693_selected_genes |
| chr7  | 55224426  | 55224561  | EGFR   | 693_selected_genes |
| chr7  | 55225330  | 55225471  | EGFR   | 693_selected_genes |
| chr7  | 55227806  | 55228056  | EGFR   | 693_selected_genes |
| chr7  | 55229166  | 55229349  | EGFR   | 693_selected_genes |
| chr7  | 55231400  | 55231541  | EGFR   | 693_selected_genes |
| chr7  | 55232947  | 55233155  | EGFR   | 693_selected_genes |
| chr7  | 55236190  | 55236247  | EGFR   | 693_selected_genes |
| chr7  | 55237974  | 55238262  | EGFR   | 693_selected_genes |
| chr7  | 55238842  | 55238931  | EGFR   | 693_selected_genes |
| chr7  | 55240513  | 55240618  | EGFR   | 693_selected_genes |
| chr7  | 55240650  | 55240842  | EGFR   | 693_selected_genes |
| chr7  | 55241588  | 55241761  | EGFR   | 693_selected_genes |
| chr7  | 55242389  | 55242538  | EGFR   | 693_selected_genes |
| chr7  | 55248960  | 55249196  | EGFR   | 693_selected_genes |
| chr7  | 55259386  | 55259592  | EGFR   | 693_selected_genes |
| chr7  | 55260433  | 55260559  | EGFR   | 693_selected_genes |
| chr7  | 55266384  | 55266581  | EGFR   | 693_selected_genes |
| chr7  | 55267983  | 55268131  | EGFR   | 693_selected_genes |
| chr7  | 55268855  | 55269073  | EGFR   | 693_selected_genes |
| chr7  | 55269402  | 55269500  | EGFR   | 693_selected_genes |
| chr7  | 55270184  | 55270483  | EGFR   | 693_selected_genes |
| chr7  | 55272923  | 55273335  | EGFR   | 693_selected_genes |
| chr8  | 22547960  | 22549020  | EGR3   | 693_selected_genes |
| chr8  | 22549789  | 22549892  | EGR3   | 693_selected_genes |
| chr8  | 22550278  | 22550482  | EGR3   | 693_selected_genes |
| chrX  | 20146398  | 20146454  | EIF1AX | 693_selected_genes |
| chrX  | 20148608  | 20148750  | EIF1AX | 693_selected_genes |
| chrX  | 20150274  | 20150406  | EIF1AX | 693_selected_genes |
| chrX  | 20152049  | 20152150  | EIF1AX | 693_selected_genes |
| chrX  | 20153830  | 20153984  | EIF1AX | 693_selected_genes |
| chrX  | 20156631  | 20156765  | EIF1AX | 693_selected_genes |
| chrX  | 20159717  | 20159783  | EIF1AX | 693_selected_genes |
| chr3  | 186501374 | 186501453 | EIF4A2 | 693_selected_genes |
| chr3  | 186502192 | 186502291 | EIF4A2 | 693_selected_genes |

|       |           |           |        |                    |
|-------|-----------|-----------|--------|--------------------|
| chr3  | 186502327 | 186502510 | EIF4A2 | 693_selected_genes |
| chr3  | 186502725 | 186502915 | EIF4A2 | 693_selected_genes |
| chr3  | 186503646 | 186503865 | EIF4A2 | 693_selected_genes |
| chr3  | 186503927 | 186504087 | EIF4A2 | 693_selected_genes |
| chr3  | 186504265 | 186504459 | EIF4A2 | 693_selected_genes |
| chr3  | 186504890 | 186505078 | EIF4A2 | 693_selected_genes |
| chr3  | 186505258 | 186505398 | EIF4A2 | 693_selected_genes |
| chr3  | 186505566 | 186505696 | EIF4A2 | 693_selected_genes |
| chr3  | 186506073 | 186506133 | EIF4A2 | 693_selected_genes |
| chr3  | 186506888 | 186507083 | EIF4A2 | 693_selected_genes |
| chr1  | 201980239 | 201980452 | ELF3   | 693_selected_genes |
| chr1  | 201981059 | 201981331 | ELF3   | 693_selected_genes |
| chr1  | 201981446 | 201981589 | ELF3   | 693_selected_genes |
| chr1  | 201981742 | 201981912 | ELF3   | 693_selected_genes |
| chr1  | 201982049 | 201982189 | ELF3   | 693_selected_genes |
| chr1  | 201982284 | 201982451 | ELF3   | 693_selected_genes |
| chr1  | 201982931 | 201983177 | ELF3   | 693_selected_genes |
| chr1  | 201984311 | 201984476 | ELF3   | 693_selected_genes |
| chr2  | 42396726  | 42396801  | EML4   | 693_selected_genes |
| chr2  | 42472619  | 42472852  | EML4   | 693_selected_genes |
| chr2  | 42483615  | 42483795  | EML4   | 693_selected_genes |
| chr2  | 42488235  | 42488466  | EML4   | 693_selected_genes |
| chr2  | 42490292  | 42490471  | EML4   | 693_selected_genes |
| chr2  | 42491820  | 42491896  | EML4   | 693_selected_genes |
| chr2  | 42492033  | 42492116  | EML4   | 693_selected_genes |
| chr2  | 42507964  | 42508138  | EML4   | 693_selected_genes |
| chr2  | 42509937  | 42510137  | EML4   | 693_selected_genes |
| chr2  | 42511748  | 42511868  | EML4   | 693_selected_genes |
| chr2  | 42513305  | 42513544  | EML4   | 693_selected_genes |
| chr2  | 42515341  | 42515487  | EML4   | 693_selected_genes |
| chr2  | 42522239  | 42522424  | EML4   | 693_selected_genes |
| chr2  | 42522495  | 42522681  | EML4   | 693_selected_genes |
| chr2  | 42528355  | 42528557  | EML4   | 693_selected_genes |
| chr2  | 42530218  | 42530394  | EML4   | 693_selected_genes |
| chr2  | 42530429  | 42530611  | EML4   | 693_selected_genes |
| chr2  | 42531598  | 42531716  | EML4   | 693_selected_genes |
| chr2  | 42543076  | 42543215  | EML4   | 693_selected_genes |
| chr2  | 42544541  | 42544689  | EML4   | 693_selected_genes |
| chr2  | 42552581  | 42552719  | EML4   | 693_selected_genes |
| chr2  | 42553204  | 42553417  | EML4   | 693_selected_genes |
| chr2  | 42556000  | 42556181  | EML4   | 693_selected_genes |
| chr2  | 42556848  | 42557372  | EML4   | 693_selected_genes |
| chr22 | 41488983  | 41489127  | EP300  | 693_selected_genes |
| chr22 | 41513165  | 41513850  | EP300  | 693_selected_genes |
| chr22 | 41521842  | 41522069  | EP300  | 693_selected_genes |
| chr22 | 41523465  | 41523777  | EP300  | 693_selected_genes |
| chr22 | 41525868  | 41526032  | EP300  | 693_selected_genes |
| chr22 | 41527366  | 41527662  | EP300  | 693_selected_genes |
| chr22 | 41531791  | 41531935  | EP300  | 693_selected_genes |
| chr22 | 41533631  | 41533819  | EP300  | 693_selected_genes |
| chr22 | 41536118  | 41536286  | EP300  | 693_selected_genes |
| chr22 | 41537026  | 41537251  | EP300  | 693_selected_genes |
| chr22 | 41542717  | 41542845  | EP300  | 693_selected_genes |
| chr22 | 41543815  | 41543975  | EP300  | 693_selected_genes |
| chr22 | 41545016  | 41545204  | EP300  | 693_selected_genes |
| chr22 | 41545739  | 41546227  | EP300  | 693_selected_genes |
| chr22 | 41547811  | 41548041  | EP300  | 693_selected_genes |
| chr22 | 41548184  | 41548379  | EP300  | 693_selected_genes |
| chr22 | 41550973  | 41551142  | EP300  | 693_selected_genes |
| chr22 | 41553147  | 41553437  | EP300  | 693_selected_genes |
| chr22 | 41554390  | 41554529  | EP300  | 693_selected_genes |
| chr22 | 41556620  | 41556751  | EP300  | 693_selected_genes |
| chr22 | 41558701  | 41558808  | EP300  | 693_selected_genes |
| chr22 | 41560031  | 41560159  | EP300  | 693_selected_genes |
| chr22 | 41562577  | 41562695  | EP300  | 693_selected_genes |
| chr22 | 41564427  | 41564628  | EP300  | 693_selected_genes |
| chr22 | 41564699  | 41564896  | EP300  | 693_selected_genes |
| chr22 | 41565481  | 41565645  | EP300  | 693_selected_genes |
| chr22 | 41566384  | 41566600  | EP300  | 693_selected_genes |
| chr22 | 41568477  | 41568692  | EP300  | 693_selected_genes |
| chr22 | 41569601  | 41569813  | EP300  | 693_selected_genes |
| chr22 | 41572225  | 41572557  | EP300  | 693_selected_genes |
| chr22 | 41572751  | 41574985  | EP300  | 693_selected_genes |
| chr2  | 47596189  | 47596399  | EPCAM  | 693_selected_genes |
| chr2  | 47596619  | 47596973  | EPCAM  | 693_selected_genes |
| chr2  | 47600576  | 47600734  | EPCAM  | 693_selected_genes |
| chr2  | 47600921  | 47601212  | EPCAM  | 693_selected_genes |
| chr2  | 47602347  | 47602463  | EPCAM  | 693_selected_genes |
| chr2  | 47604127  | 47604241  | EPCAM  | 693_selected_genes |
| chr2  | 47606066  | 47606218  | EPCAM  | 693_selected_genes |
| chr2  | 47606882  | 47607133  | EPCAM  | 693_selected_genes |
| chr2  | 47612279  | 47612374  | EPCAM  | 693_selected_genes |
| chr2  | 47613685  | 47613777  | EPCAM  | 693_selected_genes |
| chr1  | 16451684  | 16451840  | EPHA2  | 693_selected_genes |

|      |          |          |       |                    |
|------|----------|----------|-------|--------------------|
| chr1 | 16455903 | 16456109 | EPHA2 | 693_selected_genes |
| chr1 | 16456695 | 16456939 | EPHA2 | 693_selected_genes |
| chr1 | 16458190 | 16458390 | EPHA2 | 693_selected_genes |
| chr1 | 16458533 | 16458793 | EPHA2 | 693_selected_genes |
| chr1 | 16458847 | 16458959 | EPHA2 | 693_selected_genes |
| chr1 | 16459649 | 16459888 | EPHA2 | 693_selected_genes |
| chr1 | 16459950 | 16460126 | EPHA2 | 693_selected_genes |
| chr1 | 16460329 | 16460435 | EPHA2 | 693_selected_genes |
| chr1 | 16460937 | 16461087 | EPHA2 | 693_selected_genes |
| chr1 | 16461505 | 16461709 | EPHA2 | 693_selected_genes |
| chr1 | 16462124 | 16462290 | EPHA2 | 693_selected_genes |
| chr1 | 16464322 | 16464705 | EPHA2 | 693_selected_genes |
| chr1 | 16464744 | 16464950 | EPHA2 | 693_selected_genes |
| chr1 | 16474847 | 16475567 | EPHA2 | 693_selected_genes |
| chr1 | 16477365 | 16477483 | EPHA2 | 693_selected_genes |
| chr1 | 16482317 | 16482452 | EPHA2 | 693_selected_genes |
| chr3 | 89156873 | 89157011 | EPHA3 | 693_selected_genes |
| chr3 | 89176333 | 89176448 | EPHA3 | 693_selected_genes |
| chr3 | 89258984 | 89259695 | EPHA3 | 693_selected_genes |
| chr3 | 89390040 | 89390246 | EPHA3 | 693_selected_genes |
| chr3 | 89390879 | 89391265 | EPHA3 | 693_selected_genes |
| chr3 | 89444961 | 89445136 | EPHA3 | 693_selected_genes |
| chr3 | 89448442 | 89448681 | EPHA3 | 693_selected_genes |
| chr3 | 89456393 | 89456546 | EPHA3 | 693_selected_genes |
| chr3 | 89457191 | 89457306 | EPHA3 | 693_selected_genes |
| chr3 | 89462265 | 89462441 | EPHA3 | 693_selected_genes |
| chr3 | 89468329 | 89468565 | EPHA3 | 693_selected_genes |
| chr3 | 89478230 | 89478342 | EPHA3 | 693_selected_genes |
| chr3 | 89480274 | 89480534 | EPHA3 | 693_selected_genes |
| chr3 | 89498349 | 89498549 | EPHA3 | 693_selected_genes |
| chr3 | 89499301 | 89499545 | EPHA3 | 693_selected_genes |
| chr3 | 89521588 | 89521794 | EPHA3 | 693_selected_genes |
| chr3 | 89528521 | 89528677 | EPHA3 | 693_selected_genes |
| chr4 | 66189806 | 66189962 | EPHA5 | 693_selected_genes |
| chr4 | 66197661 | 66197871 | EPHA5 | 693_selected_genes |
| chr4 | 66201624 | 66201868 | EPHA5 | 693_selected_genes |
| chr4 | 66213746 | 66213946 | EPHA5 | 693_selected_genes |
| chr4 | 66217081 | 66217341 | EPHA5 | 693_selected_genes |
| chr4 | 66218734 | 66218846 | EPHA5 | 693_selected_genes |
| chr4 | 66230709 | 66230945 | EPHA5 | 693_selected_genes |
| chr4 | 66231624 | 66231800 | EPHA5 | 693_selected_genes |
| chr4 | 66233049 | 66233167 | EPHA5 | 693_selected_genes |
| chr4 | 66242690 | 66242806 | EPHA5 | 693_selected_genes |
| chr4 | 66270066 | 66270222 | EPHA5 | 693_selected_genes |
| chr4 | 66279976 | 66280186 | EPHA5 | 693_selected_genes |
| chr4 | 66286133 | 66286308 | EPHA5 | 693_selected_genes |
| chr4 | 66356069 | 66356455 | EPHA5 | 693_selected_genes |
| chr4 | 66361080 | 66361286 | EPHA5 | 693_selected_genes |
| chr4 | 66467333 | 66468047 | EPHA5 | 693_selected_genes |
| chr4 | 66509055 | 66509170 | EPHA5 | 693_selected_genes |
| chr4 | 66535254 | 66535485 | EPHA5 | 693_selected_genes |
| chr3 | 96533442 | 96533877 | EPHA6 | 693_selected_genes |
| chr3 | 96585643 | 96585758 | EPHA6 | 693_selected_genes |
| chr3 | 96706148 | 96706862 | EPHA6 | 693_selected_genes |
| chr3 | 96728822 | 96728898 | EPHA6 | 693_selected_genes |
| chr3 | 96945082 | 96945288 | EPHA6 | 693_selected_genes |
| chr3 | 96962770 | 96963194 | EPHA6 | 693_selected_genes |
| chr3 | 97123968 | 97124143 | EPHA6 | 693_selected_genes |
| chr3 | 97167386 | 97167599 | EPHA6 | 693_selected_genes |
| chr3 | 97185237 | 97185351 | EPHA6 | 693_selected_genes |
| chr3 | 97194170 | 97194329 | EPHA6 | 693_selected_genes |
| chr3 | 97198112 | 97198233 | EPHA6 | 693_selected_genes |
| chr3 | 97202752 | 97202928 | EPHA6 | 693_selected_genes |
| chr3 | 97251176 | 97251412 | EPHA6 | 693_selected_genes |
| chr3 | 97278409 | 97278524 | EPHA6 | 693_selected_genes |
| chr3 | 97311430 | 97311606 | EPHA6 | 693_selected_genes |
| chr3 | 97329611 | 97329723 | EPHA6 | 693_selected_genes |
| chr3 | 97331196 | 97331300 | EPHA6 | 693_selected_genes |
| chr3 | 97356691 | 97356951 | EPHA6 | 693_selected_genes |
| chr3 | 97364937 | 97365179 | EPHA6 | 693_selected_genes |
| chr3 | 97367104 | 97367199 | EPHA6 | 693_selected_genes |
| chr3 | 97439079 | 97439279 | EPHA6 | 693_selected_genes |
| chr3 | 97454743 | 97454987 | EPHA6 | 693_selected_genes |
| chr3 | 97464177 | 97464249 | EPHA6 | 693_selected_genes |
| chr3 | 97466241 | 97466441 | EPHA6 | 693_selected_genes |
| chr3 | 97467405 | 97467570 | EPHA6 | 693_selected_genes |
| chr6 | 93953118 | 93953283 | EPHA7 | 693_selected_genes |
| chr6 | 93954990 | 93955196 | EPHA7 | 693_selected_genes |
| chr6 | 93956484 | 93956728 | EPHA7 | 693_selected_genes |
| chr6 | 93964339 | 93964539 | EPHA7 | 693_selected_genes |
| chr6 | 93965520 | 93965780 | EPHA7 | 693_selected_genes |
| chr6 | 93967154 | 93967266 | EPHA7 | 693_selected_genes |
| chr6 | 93967791 | 93968027 | EPHA7 | 693_selected_genes |
| chr6 | 93969046 | 93969222 | EPHA7 | 693_selected_genes |

|       |           |           |       |                    |
|-------|-----------|-----------|-------|--------------------|
| chr6  | 93973552  | 93973658  | EPHA7 | 693_selected_genes |
| chr6  | 93974286  | 93974445  | EPHA7 | 693_selected_genes |
| chr6  | 93979169  | 93979403  | EPHA7 | 693_selected_genes |
| chr6  | 93981990  | 93982165  | EPHA7 | 693_selected_genes |
| chr6  | 94066409  | 94066795  | EPHA7 | 693_selected_genes |
| chr6  | 94067948  | 94068154  | EPHA7 | 693_selected_genes |
| chr6  | 94120185  | 94120913  | EPHA7 | 693_selected_genes |
| chr6  | 94124395  | 94124510  | EPHA7 | 693_selected_genes |
| chr6  | 94128937  | 94129084  | EPHA7 | 693_selected_genes |
| chr3  | 134514448 | 134514556 | EPHB1 | 693_selected_genes |
| chr3  | 134644632 | 134644747 | EPHB1 | 693_selected_genes |
| chr3  | 134670187 | 134670919 | EPHB1 | 693_selected_genes |
| chr3  | 134696782 | 134696873 | EPHB1 | 693_selected_genes |
| chr3  | 134825264 | 134825470 | EPHB1 | 693_selected_genes |
| chr3  | 134851530 | 134851916 | EPHB1 | 693_selected_genes |
| chr3  | 134872968 | 134873143 | EPHB1 | 693_selected_genes |
| chr3  | 134880834 | 134881047 | EPHB1 | 693_selected_genes |
| chr3  | 134884784 | 134884943 | EPHB1 | 693_selected_genes |
| chr3  | 134885758 | 134885873 | EPHB1 | 693_selected_genes |
| chr3  | 134898676 | 134898849 | EPHB1 | 693_selected_genes |
| chr3  | 134911392 | 134911690 | EPHB1 | 693_selected_genes |
| chr3  | 134920290 | 134920556 | EPHB1 | 693_selected_genes |
| chr3  | 134959964 | 134960164 | EPHB1 | 693_selected_genes |
| chr3  | 134967132 | 134967376 | EPHB1 | 693_selected_genes |
| chr3  | 134968152 | 134968358 | EPHB1 | 693_selected_genes |
| chr3  | 134977828 | 134977987 | EPHB1 | 693_selected_genes |
| chr1  | 23037450  | 23037561  | EPHB2 | 693_selected_genes |
| chr1  | 23101669  | 23101762  | EPHB2 | 693_selected_genes |
| chr1  | 23107888  | 23108003  | EPHB2 | 693_selected_genes |
| chr1  | 23110859  | 23111594  | EPHB2 | 693_selected_genes |
| chr1  | 23189504  | 23189710  | EPHB2 | 693_selected_genes |
| chr1  | 23191344  | 23191730  | EPHB2 | 693_selected_genes |
| chr1  | 23208826  | 23209001  | EPHB2 | 693_selected_genes |
| chr1  | 23217596  | 23217667  | EPHB2 | 693_selected_genes |
| chr1  | 23219348  | 23219564  | EPHB2 | 693_selected_genes |
| chr1  | 23221939  | 23222098  | EPHB2 | 693_selected_genes |
| chr1  | 23222878  | 23222996  | EPHB2 | 693_selected_genes |
| chr1  | 23232454  | 23232627  | EPHB2 | 693_selected_genes |
| chr1  | 23233177  | 23233475  | EPHB2 | 693_selected_genes |
| chr1  | 23234420  | 23234686  | EPHB2 | 693_selected_genes |
| chr1  | 23235489  | 23235689  | EPHB2 | 693_selected_genes |
| chr1  | 23236849  | 23237093  | EPHB2 | 693_selected_genes |
| chr1  | 23238911  | 23239121  | EPHB2 | 693_selected_genes |
| chr1  | 23239929  | 23240088  | EPHB2 | 693_selected_genes |
| chr1  | 23240125  | 23240388  | EPHB2 | 693_selected_genes |
| chr7  | 142560960 | 142561110 | EPHB6 | 693_selected_genes |
| chr7  | 142561363 | 142561478 | EPHB6 | 693_selected_genes |
| chr7  | 142561698 | 142562529 | EPHB6 | 693_selected_genes |
| chr7  | 142563204 | 142563410 | EPHB6 | 693_selected_genes |
| chr7  | 142563689 | 142564096 | EPHB6 | 693_selected_genes |
| chr7  | 142564210 | 142564385 | EPHB6 | 693_selected_genes |
| chr7  | 142564635 | 142564848 | EPHB6 | 693_selected_genes |
| chr7  | 142565337 | 142565502 | EPHB6 | 693_selected_genes |
| chr7  | 142565726 | 142565829 | EPHB6 | 693_selected_genes |
| chr7  | 142565970 | 142566140 | EPHB6 | 693_selected_genes |
| chr7  | 142566221 | 142566519 | EPHB6 | 693_selected_genes |
| chr7  | 142566701 | 142566925 | EPHB6 | 693_selected_genes |
| chr7  | 142567544 | 142567744 | EPHB6 | 693_selected_genes |
| chr7  | 142567941 | 142568185 | EPHB6 | 693_selected_genes |
| chr7  | 142568257 | 142568463 | EPHB6 | 693_selected_genes |
| chr7  | 142568523 | 142568682 | EPHB6 | 693_selected_genes |
| chr8  | 144940133 | 144947446 | EPPK1 | 693_selected_genes |
| chr17 | 37855787  | 37855865  | ERBB2 | 693_selected_genes |
| chr17 | 37856466  | 37856589  | ERBB2 | 693_selected_genes |
| chr17 | 37863217  | 37863467  | ERBB2 | 693_selected_genes |
| chr17 | 37864548  | 37864812  | ERBB2 | 693_selected_genes |
| chr17 | 37865545  | 37865730  | ERBB2 | 693_selected_genes |
| chr17 | 37866040  | 37866159  | ERBB2 | 693_selected_genes |
| chr17 | 37866313  | 37866479  | ERBB2 | 693_selected_genes |
| chr17 | 37866567  | 37866759  | ERBB2 | 693_selected_genes |
| chr17 | 37868155  | 37868325  | ERBB2 | 693_selected_genes |
| chr17 | 37868549  | 37868726  | ERBB2 | 693_selected_genes |
| chr17 | 37869380  | 37869547  | ERBB2 | 693_selected_genes |
| chr17 | 37871513  | 37871637  | ERBB2 | 693_selected_genes |
| chr17 | 37871673  | 37871814  | ERBB2 | 693_selected_genes |
| chr17 | 37871967  | 37872217  | ERBB2 | 693_selected_genes |
| chr17 | 37872528  | 37872711  | ERBB2 | 693_selected_genes |
| chr17 | 37872742  | 37872883  | ERBB2 | 693_selected_genes |
| chr17 | 37873547  | 37873762  | ERBB2 | 693_selected_genes |
| chr17 | 37876014  | 37876112  | ERBB2 | 693_selected_genes |
| chr17 | 37879546  | 37879735  | ERBB2 | 693_selected_genes |
| chr17 | 37879765  | 37879938  | ERBB2 | 693_selected_genes |
| chr17 | 37880139  | 37880288  | ERBB2 | 693_selected_genes |
| chr17 | 37880953  | 37881189  | ERBB2 | 693_selected_genes |

|       |           |           |       |                    |
|-------|-----------|-----------|-------|--------------------|
| chr17 | 37881276  | 37881482  | ERBB2 | 693_selected_genes |
| chr17 | 37881554  | 37881680  | ERBB2 | 693_selected_genes |
| chr17 | 37881934  | 37882131  | ERBB2 | 693_selected_genes |
| chr17 | 37882789  | 37882937  | ERBB2 | 693_selected_genes |
| chr17 | 37883042  | 37883281  | ERBB2 | 693_selected_genes |
| chr17 | 37883522  | 37883825  | ERBB2 | 693_selected_genes |
| chr17 | 37883916  | 37884322  | ERBB2 | 693_selected_genes |
| chr12 | 56474059  | 56474191  | ERBB3 | 693_selected_genes |
| chr12 | 56477509  | 56477711  | ERBB3 | 693_selected_genes |
| chr12 | 56478753  | 56479121  | ERBB3 | 693_selected_genes |
| chr12 | 56480289  | 56480465  | ERBB3 | 693_selected_genes |
| chr12 | 56481335  | 56481451  | ERBB3 | 693_selected_genes |
| chr12 | 56481553  | 56481722  | ERBB3 | 693_selected_genes |
| chr12 | 56481779  | 56481971  | ERBB3 | 693_selected_genes |
| chr12 | 56482301  | 56482465  | ERBB3 | 693_selected_genes |
| chr12 | 56482506  | 56482677  | ERBB3 | 693_selected_genes |
| chr12 | 56486505  | 56486629  | ERBB3 | 693_selected_genes |
| chr12 | 56486744  | 56486885  | ERBB3 | 693_selected_genes |
| chr12 | 56487103  | 56487359  | ERBB3 | 693_selected_genes |
| chr12 | 56487522  | 56487705  | ERBB3 | 693_selected_genes |
| chr12 | 56487857  | 56487998  | ERBB3 | 693_selected_genes |
| chr12 | 56488160  | 56488365  | ERBB3 | 693_selected_genes |
| chr12 | 56489015  | 56489119  | ERBB3 | 693_selected_genes |
| chr12 | 56489423  | 56489615  | ERBB3 | 693_selected_genes |
| chr12 | 56490261  | 56490431  | ERBB3 | 693_selected_genes |
| chr12 | 56490506  | 56490655  | ERBB3 | 693_selected_genes |
| chr12 | 56490803  | 56491039  | ERBB3 | 693_selected_genes |
| chr12 | 56491543  | 56491749  | ERBB3 | 693_selected_genes |
| chr12 | 56492258  | 56492458  | ERBB3 | 693_selected_genes |
| chr12 | 56492465  | 56492714  | ERBB3 | 693_selected_genes |
| chr12 | 56493406  | 56493554  | ERBB3 | 693_selected_genes |
| chr12 | 56493596  | 56493838  | ERBB3 | 693_selected_genes |
| chr12 | 56493932  | 56494054  | ERBB3 | 693_selected_genes |
| chr12 | 56494819  | 56495170  | ERBB3 | 693_selected_genes |
| chr12 | 56495287  | 56495864  | ERBB3 | 693_selected_genes |
| chr2  | 212248314 | 212248810 | ERBB4 | 693_selected_genes |
| chr2  | 212251552 | 212251900 | ERBB4 | 693_selected_genes |
| chr2  | 212252644 | 212252742 | ERBB4 | 693_selected_genes |
| chr2  | 212285140 | 212285361 | ERBB4 | 693_selected_genes |
| chr2  | 212286706 | 212286854 | ERBB4 | 693_selected_genes |
| chr2  | 212288854 | 212289051 | ERBB4 | 693_selected_genes |
| chr2  | 212293107 | 212293233 | ERBB4 | 693_selected_genes |
| chr2  | 212295644 | 212295850 | ERBB4 | 693_selected_genes |
| chr2  | 212426602 | 212426838 | ERBB4 | 693_selected_genes |
| chr2  | 212483876 | 212484025 | ERBB4 | 693_selected_genes |
| chr2  | 212488621 | 212488794 | ERBB4 | 693_selected_genes |
| chr2  | 212495161 | 212495344 | ERBB4 | 693_selected_genes |
| chr2  | 212522453 | 212522578 | ERBB4 | 693_selected_genes |
| chr2  | 212522649 | 212522744 | ERBB4 | 693_selected_genes |
| chr2  | 212530022 | 212530227 | ERBB4 | 693_selected_genes |
| chr2  | 212537863 | 212538007 | ERBB4 | 693_selected_genes |
| chr2  | 212543751 | 212543934 | ERBB4 | 693_selected_genes |
| chr2  | 212566666 | 212566916 | ERBB4 | 693_selected_genes |
| chr2  | 212568803 | 212568944 | ERBB4 | 693_selected_genes |
| chr2  | 212570017 | 212570141 | ERBB4 | 693_selected_genes |
| chr2  | 212576749 | 212576926 | ERBB4 | 693_selected_genes |
| chr2  | 212578234 | 212578398 | ERBB4 | 693_selected_genes |
| chr2  | 212587092 | 212587284 | ERBB4 | 693_selected_genes |
| chr2  | 212589775 | 212589944 | ERBB4 | 693_selected_genes |
| chr2  | 212615338 | 212615454 | ERBB4 | 693_selected_genes |
| chr2  | 212652724 | 212652909 | ERBB4 | 693_selected_genes |
| chr2  | 212812129 | 212812366 | ERBB4 | 693_selected_genes |
| chr2  | 212989451 | 212989653 | ERBB4 | 693_selected_genes |
| chr2  | 213403147 | 213403279 | ERBB4 | 693_selected_genes |
| chr19 | 45912907  | 45913008  | ERCC1 | 693_selected_genes |
| chr19 | 45916780  | 45917028  | ERCC1 | 693_selected_genes |
| chr19 | 45917195  | 45917317  | ERCC1 | 693_selected_genes |
| chr19 | 45918093  | 45918243  | ERCC1 | 693_selected_genes |
| chr19 | 45920053  | 45920180  | ERCC1 | 693_selected_genes |
| chr19 | 45922330  | 45922480  | ERCC1 | 693_selected_genes |
| chr19 | 45922643  | 45922772  | ERCC1 | 693_selected_genes |
| chr19 | 45923556  | 45923710  | ERCC1 | 693_selected_genes |
| chr19 | 45924410  | 45924676  | ERCC1 | 693_selected_genes |
| chr19 | 45926502  | 45926657  | ERCC1 | 693_selected_genes |
| chr19 | 45854861  | 45855004  | ERCC2 | 693_selected_genes |
| chr19 | 45855441  | 45855635  | ERCC2 | 693_selected_genes |
| chr19 | 45855738  | 45855932  | ERCC2 | 693_selected_genes |
| chr19 | 45855978  | 45856099  | ERCC2 | 693_selected_genes |
| chr19 | 45856315  | 45856438  | ERCC2 | 693_selected_genes |
| chr19 | 45856474  | 45856617  | ERCC2 | 693_selected_genes |
| chr19 | 45857962  | 45858134  | ERCC2 | 693_selected_genes |
| chr19 | 45858897  | 45859011  | ERCC2 | 693_selected_genes |
| chr19 | 45860502  | 45860654  | ERCC2 | 693_selected_genes |
| chr19 | 45860706  | 45860826  | ERCC2 | 693_selected_genes |

|       |           |           |       |                    |
|-------|-----------|-----------|-------|--------------------|
| chr19 | 45860862  | 45860982  | ERCC2 | 693_selected_genes |
| chr19 | 45862092  | 45862195  | ERCC2 | 693_selected_genes |
| chr19 | 45864756  | 45864925  | ERCC2 | 693_selected_genes |
| chr19 | 45866975  | 45867194  | ERCC2 | 693_selected_genes |
| chr19 | 45867218  | 45867402  | ERCC2 | 693_selected_genes |
| chr19 | 45867467  | 45867614  | ERCC2 | 693_selected_genes |
| chr19 | 45867656  | 45867830  | ERCC2 | 693_selected_genes |
| chr19 | 45868070  | 45868237  | ERCC2 | 693_selected_genes |
| chr19 | 45868274  | 45868441  | ERCC2 | 693_selected_genes |
| chr19 | 45871862  | 45872026  | ERCC2 | 693_selected_genes |
| chr19 | 45872162  | 45872275  | ERCC2 | 693_selected_genes |
| chr19 | 45872302  | 45872430  | ERCC2 | 693_selected_genes |
| chr19 | 45873365  | 45873515  | ERCC2 | 693_selected_genes |
| chr19 | 45873768  | 45873823  | ERCC2 | 693_selected_genes |
| chr2  | 128015146 | 128015328 | ERCC3 | 693_selected_genes |
| chr2  | 128016846 | 128017049 | ERCC3 | 693_selected_genes |
| chr2  | 128018778 | 128018947 | ERCC3 | 693_selected_genes |
| chr2  | 128028886 | 128029054 | ERCC3 | 693_selected_genes |
| chr2  | 128030415 | 128030562 | ERCC3 | 693_selected_genes |
| chr2  | 128036723 | 128036976 | ERCC3 | 693_selected_genes |
| chr2  | 128037997 | 128038232 | ERCC3 | 693_selected_genes |
| chr2  | 128044253 | 128044618 | ERCC3 | 693_selected_genes |
| chr2  | 128046210 | 128046465 | ERCC3 | 693_selected_genes |
| chr2  | 128046887 | 128047120 | ERCC3 | 693_selected_genes |
| chr2  | 128047239 | 128047425 | ERCC3 | 693_selected_genes |
| chr2  | 128047774 | 128047876 | ERCC3 | 693_selected_genes |
| chr2  | 128050160 | 128050447 | ERCC3 | 693_selected_genes |
| chr2  | 128051063 | 128051319 | ERCC3 | 693_selected_genes |
| chr2  | 128051416 | 128051682 | ERCC3 | 693_selected_genes |
| chr16 | 14013997  | 14014254  | ERCC4 | 693_selected_genes |
| chr16 | 14015862  | 14016093  | ERCC4 | 693_selected_genes |
| chr16 | 14020383  | 14020638  | ERCC4 | 693_selected_genes |
| chr16 | 14021859  | 14022117  | ERCC4 | 693_selected_genes |
| chr16 | 14024541  | 14024772  | ERCC4 | 693_selected_genes |
| chr16 | 14025988  | 14026184  | ERCC4 | 693_selected_genes |
| chr16 | 14028023  | 14028184  | ERCC4 | 693_selected_genes |
| chr16 | 14028977  | 14029626  | ERCC4 | 693_selected_genes |
| chr16 | 14031595  | 14031740  | ERCC4 | 693_selected_genes |
| chr16 | 14037805  | 14037868  | ERCC4 | 693_selected_genes |
| chr16 | 14038554  | 14038717  | ERCC4 | 693_selected_genes |
| chr16 | 14041445  | 14042229  | ERCC4 | 693_selected_genes |
| chr13 | 103498591 | 103498729 | ERCC5 | 693_selected_genes |
| chr13 | 103501442 | 103501569 | ERCC5 | 693_selected_genes |
| chr13 | 103504442 | 103504668 | ERCC5 | 693_selected_genes |
| chr13 | 103506081 | 103506296 | ERCC5 | 693_selected_genes |
| chr13 | 103506612 | 103506749 | ERCC5 | 693_selected_genes |
| chr13 | 103508376 | 103508487 | ERCC5 | 693_selected_genes |
| chr13 | 103510599 | 103510793 | ERCC5 | 693_selected_genes |
| chr13 | 103511235 | 103511312 | ERCC5 | 693_selected_genes |
| chr13 | 103513831 | 103514089 | ERCC5 | 693_selected_genes |
| chr13 | 103514354 | 103515478 | ERCC5 | 693_selected_genes |
| chr13 | 103517991 | 103518286 | ERCC5 | 693_selected_genes |
| chr13 | 103518586 | 103518756 | ERCC5 | 693_selected_genes |
| chr13 | 103518956 | 103519220 | ERCC5 | 693_selected_genes |
| chr13 | 103520437 | 103520632 | ERCC5 | 693_selected_genes |
| chr13 | 103524522 | 103524773 | ERCC5 | 693_selected_genes |
| chr13 | 103525583 | 103525718 | ERCC5 | 693_selected_genes |
| chr13 | 103527631 | 103528278 | ERCC5 | 693_selected_genes |
| chr21 | 39739531  | 39739595  | ERG   | 693_selected_genes |
| chr21 | 39755299  | 39755870  | ERG   | 693_selected_genes |
| chr21 | 39762891  | 39762989  | ERG   | 693_selected_genes |
| chr21 | 39763555  | 39763662  | ERG   | 693_selected_genes |
| chr21 | 39764213  | 39764391  | ERG   | 693_selected_genes |
| chr21 | 39772258  | 39772592  | ERG   | 693_selected_genes |
| chr21 | 39774453  | 39774584  | ERG   | 693_selected_genes |
| chr21 | 39775402  | 39775656  | ERG   | 693_selected_genes |
| chr21 | 39795306  | 39795508  | ERG   | 693_selected_genes |
| chr21 | 39817301  | 39817569  | ERG   | 693_selected_genes |
| chr21 | 39870261  | 39870329  | ERG   | 693_selected_genes |
| chr21 | 39947560  | 39947649  | ERG   | 693_selected_genes |
| chr6  | 152129022 | 152129524 | ESR1  | 693_selected_genes |
| chr6  | 152130216 | 152130432 | ESR1  | 693_selected_genes |
| chr6  | 152163706 | 152163953 | ESR1  | 693_selected_genes |
| chr6  | 152201764 | 152201931 | ESR1  | 693_selected_genes |
| chr6  | 152265282 | 152265668 | ESR1  | 693_selected_genes |
| chr6  | 152332765 | 152332954 | ESR1  | 693_selected_genes |
| chr6  | 152382100 | 152382284 | ESR1  | 693_selected_genes |
| chr6  | 152415494 | 152415728 | ESR1  | 693_selected_genes |
| chr6  | 152419841 | 152420126 | ESR1  | 693_selected_genes |
| chr6  | 152446375 | 152446508 | ESR1  | 693_selected_genes |
| chr14 | 64551609  | 64551795  | ESR2  | 693_selected_genes |
| chr14 | 64694225  | 64694357  | ESR2  | 693_selected_genes |
| chr14 | 64694582  | 64694672  | ESR2  | 693_selected_genes |
| chr14 | 64694719  | 64694788  | ESR2  | 693_selected_genes |

|       |           |           |       |                    |
|-------|-----------|-----------|-------|--------------------|
| chr14 | 64699829  | 64700066  | ESR2  | 693_selected_genes |
| chr14 | 64701649  | 64701893  | ESR2  | 693_selected_genes |
| chr14 | 64716238  | 64716422  | ESR2  | 693_selected_genes |
| chr14 | 64723918  | 64724107  | ESR2  | 693_selected_genes |
| chr14 | 64727141  | 64727491  | ESR2  | 693_selected_genes |
| chr14 | 64735487  | 64735654  | ESR2  | 693_selected_genes |
| chr14 | 64746673  | 64746896  | ESR2  | 693_selected_genes |
| chr14 | 64749316  | 64749728  | ESR2  | 693_selected_genes |
| chr7  | 13935465  | 13935737  | ETV1  | 693_selected_genes |
| chr7  | 13940337  | 13940489  | ETV1  | 693_selected_genes |
| chr7  | 13946029  | 13946249  | ETV1  | 693_selected_genes |
| chr7  | 13947392  | 13947506  | ETV1  | 693_selected_genes |
| chr7  | 13949231  | 13949350  | ETV1  | 693_selected_genes |
| chr7  | 13950838  | 13950957  | ETV1  | 693_selected_genes |
| chr7  | 13971101  | 13971399  | ETV1  | 693_selected_genes |
| chr7  | 13975307  | 13975546  | ETV1  | 693_selected_genes |
| chr7  | 13978716  | 13978896  | ETV1  | 693_selected_genes |
| chr7  | 14017026  | 14017130  | ETV1  | 693_selected_genes |
| chr7  | 14025715  | 14025826  | ETV1  | 693_selected_genes |
| chr7  | 14026232  | 14026335  | ETV1  | 693_selected_genes |
| chr7  | 14027685  | 14027823  | ETV1  | 693_selected_genes |
| chr7  | 14028279  | 14028416  | ETV1  | 693_selected_genes |
| chr7  | 14028607  | 14028702  | ETV1  | 693_selected_genes |
| chr17 | 41605861  | 41606136  | ETV4  | 693_selected_genes |
| chr17 | 41606477  | 41606629  | ETV4  | 693_selected_genes |
| chr17 | 41606846  | 41607069  | ETV4  | 693_selected_genes |
| chr17 | 41607226  | 41607345  | ETV4  | 693_selected_genes |
| chr17 | 41607449  | 41607574  | ETV4  | 693_selected_genes |
| chr17 | 41610016  | 41610332  | ETV4  | 693_selected_genes |
| chr17 | 41610529  | 41610741  | ETV4  | 693_selected_genes |
| chr17 | 41611201  | 41611378  | ETV4  | 693_selected_genes |
| chr17 | 41613768  | 41613872  | ETV4  | 693_selected_genes |
| chr17 | 41622317  | 41622415  | ETV4  | 693_selected_genes |
| chr17 | 41622616  | 41622760  | ETV4  | 693_selected_genes |
| chr17 | 41622900  | 41623010  | ETV4  | 693_selected_genes |
| chr3  | 185766402 | 185766674 | ETV5  | 693_selected_genes |
| chr3  | 185769793 | 185769945 | ETV5  | 693_selected_genes |
| chr3  | 185774838 | 185775058 | ETV5  | 693_selected_genes |
| chr3  | 185775186 | 185775305 | ETV5  | 693_selected_genes |
| chr3  | 185782180 | 185782290 | ETV5  | 693_selected_genes |
| chr3  | 185783576 | 185783886 | ETV5  | 693_selected_genes |
| chr3  | 185797580 | 185797918 | ETV5  | 693_selected_genes |
| chr3  | 185798809 | 185798989 | ETV5  | 693_selected_genes |
| chr3  | 185801932 | 185802094 | ETV5  | 693_selected_genes |
| chr3  | 185823068 | 185823169 | ETV5  | 693_selected_genes |
| chr3  | 185823212 | 185823310 | ETV5  | 693_selected_genes |
| chr3  | 185823388 | 185823526 | ETV5  | 693_selected_genes |
| chr3  | 185823587 | 185823756 | ETV5  | 693_selected_genes |
| chr3  | 185826220 | 185826322 | ETV5  | 693_selected_genes |
| chr12 | 11803036  | 11803119  | ETV6  | 693_selected_genes |
| chr12 | 11905358  | 11905538  | ETV6  | 693_selected_genes |
| chr12 | 11992048  | 11992263  | ETV6  | 693_selected_genes |
| chr12 | 11993369  | 11993442  | ETV6  | 693_selected_genes |
| chr12 | 12006335  | 12006520  | ETV6  | 693_selected_genes |
| chr12 | 12022332  | 12022928  | ETV6  | 693_selected_genes |
| chr12 | 12037353  | 12037546  | ETV6  | 693_selected_genes |
| chr12 | 12038834  | 12038985  | ETV6  | 693_selected_genes |
| chr12 | 12043849  | 12044005  | ETV6  | 693_selected_genes |
| chr12 | 12044449  | 12044560  | ETV6  | 693_selected_genes |
| chr22 | 29664300  | 29664363  | EWSR1 | 693_selected_genes |
| chr22 | 29668179  | 29668266  | EWSR1 | 693_selected_genes |
| chr22 | 29668343  | 29668445  | EWSR1 | 693_selected_genes |
| chr22 | 29669701  | 29669878  | EWSR1 | 693_selected_genes |
| chr22 | 29670228  | 29670296  | EWSR1 | 693_selected_genes |
| chr22 | 29673993  | 29674230  | EWSR1 | 693_selected_genes |
| chr22 | 29678353  | 29678571  | EWSR1 | 693_selected_genes |
| chr22 | 29682885  | 29683148  | EWSR1 | 693_selected_genes |
| chr22 | 29684569  | 29684800  | EWSR1 | 693_selected_genes |
| chr22 | 29686376  | 29686517  | EWSR1 | 693_selected_genes |
| chr22 | 29687525  | 29687613  | EWSR1 | 693_selected_genes |
| chr22 | 29688100  | 29688183  | EWSR1 | 693_selected_genes |
| chr22 | 29688451  | 29688620  | EWSR1 | 693_selected_genes |
| chr22 | 29692203  | 29692383  | EWSR1 | 693_selected_genes |
| chr22 | 29693791  | 29693964  | EWSR1 | 693_selected_genes |
| chr22 | 29694697  | 29694910  | EWSR1 | 693_selected_genes |
| chr22 | 29695159  | 29695346  | EWSR1 | 693_selected_genes |
| chr22 | 29695563  | 29695866  | EWSR1 | 693_selected_genes |
| chr22 | 29696086  | 29696176  | EWSR1 | 693_selected_genes |
| chr8  | 118811925 | 118812161 | EXT1  | 693_selected_genes |
| chr8  | 118816935 | 118817157 | EXT1  | 693_selected_genes |
| chr8  | 118819430 | 118819641 | EXT1  | 693_selected_genes |
| chr8  | 118825085 | 118825225 | EXT1  | 693_selected_genes |
| chr8  | 118830648 | 118830794 | EXT1  | 693_selected_genes |
| chr8  | 118831889 | 118832058 | EXT1  | 693_selected_genes |

|       |           |           |         |                    |
|-------|-----------|-----------|---------|--------------------|
| chr8  | 118834678 | 118834861 | EXT1    | 693_selected_genes |
| chr8  | 118842443 | 118842613 | EXT1    | 693_selected_genes |
| chr8  | 118843812 | 118843917 | EXT1    | 693_selected_genes |
| chr8  | 118847657 | 118847815 | EXT1    | 693_selected_genes |
| chr8  | 118849321 | 118849465 | EXT1    | 693_selected_genes |
| chr8  | 119122298 | 119123310 | EXT1    | 693_selected_genes |
| chr11 | 44117777  | 44117896  | EXT2    | 693_selected_genes |
| chr11 | 44129207  | 44129823  | EXT2    | 693_selected_genes |
| chr11 | 44130718  | 44130858  | EXT2    | 693_selected_genes |
| chr11 | 44135709  | 44135876  | EXT2    | 693_selected_genes |
| chr11 | 44146313  | 44146559  | EXT2    | 693_selected_genes |
| chr11 | 44148340  | 44148530  | EXT2    | 693_selected_genes |
| chr11 | 44151569  | 44151713  | EXT2    | 693_selected_genes |
| chr11 | 44165771  | 44165914  | EXT2    | 693_selected_genes |
| chr11 | 44193135  | 44193317  | EXT2    | 693_selected_genes |
| chr11 | 44219353  | 44219593  | EXT2    | 693_selected_genes |
| chr11 | 44228317  | 44228534  | EXT2    | 693_selected_genes |
| chr11 | 44253877  | 44254071  | EXT2    | 693_selected_genes |
| chr11 | 44255639  | 44255818  | EXT2    | 693_selected_genes |
| chr11 | 44257817  | 44257950  | EXT2    | 693_selected_genes |
| chr11 | 44265673  | 44265862  | EXT2    | 693_selected_genes |
| chr17 | 40854524  | 40854635  | EZH1    | 693_selected_genes |
| chr17 | 40854869  | 40855004  | EZH1    | 693_selected_genes |
| chr17 | 40855732  | 40855863  | EZH1    | 693_selected_genes |
| chr17 | 40856594  | 40856726  | EZH1    | 693_selected_genes |
| chr17 | 40857080  | 40857226  | EZH1    | 693_selected_genes |
| chr17 | 40857999  | 40858228  | EZH1    | 693_selected_genes |
| chr17 | 40859950  | 40860126  | EZH1    | 693_selected_genes |
| chr17 | 40860868  | 40860959  | EZH1    | 693_selected_genes |
| chr17 | 40861838  | 40861980  | EZH1    | 693_selected_genes |
| chr17 | 40864281  | 40864528  | EZH1    | 693_selected_genes |
| chr17 | 40865201  | 40865432  | EZH1    | 693_selected_genes |
| chr17 | 40869968  | 40870110  | EZH1    | 693_selected_genes |
| chr17 | 40870446  | 40870660  | EZH1    | 693_selected_genes |
| chr17 | 40871097  | 40871250  | EZH1    | 693_selected_genes |
| chr17 | 40872265  | 40872492  | EZH1    | 693_selected_genes |
| chr17 | 40874787  | 40874958  | EZH1    | 693_selected_genes |
| chr17 | 40876297  | 40876467  | EZH1    | 693_selected_genes |
| chr17 | 40879627  | 40879806  | EZH1    | 693_selected_genes |
| chr17 | 40880817  | 40880984  | EZH1    | 693_selected_genes |
| chr7  | 148504712 | 148504823 | EZH2    | 693_selected_genes |
| chr7  | 148506137 | 148506272 | EZH2    | 693_selected_genes |
| chr7  | 148506376 | 148506507 | EZH2    | 693_selected_genes |
| chr7  | 148507399 | 148507531 | EZH2    | 693_selected_genes |
| chr7  | 148508691 | 148508837 | EZH2    | 693_selected_genes |
| chr7  | 148511025 | 148511254 | EZH2    | 693_selected_genes |
| chr7  | 148511980 | 148512156 | EZH2    | 693_selected_genes |
| chr7  | 148512572 | 148512663 | EZH2    | 693_selected_genes |
| chr7  | 148513750 | 148513895 | EZH2    | 693_selected_genes |
| chr7  | 148514288 | 148514508 | EZH2    | 693_selected_genes |
| chr7  | 148514943 | 148515234 | EZH2    | 693_selected_genes |
| chr7  | 148516105 | 148516176 | EZH2    | 693_selected_genes |
| chr7  | 148516662 | 148516804 | EZH2    | 693_selected_genes |
| chr7  | 148523520 | 148523749 | EZH2    | 693_selected_genes |
| chr7  | 148524230 | 148524383 | EZH2    | 693_selected_genes |
| chr7  | 148525806 | 148525997 | EZH2    | 693_selected_genes |
| chr7  | 148526794 | 148526965 | EZH2    | 693_selected_genes |
| chr7  | 148529700 | 148529867 | EZH2    | 693_selected_genes |
| chr7  | 148533888 | 148534117 | EZH2    | 693_selected_genes |
| chr7  | 148543536 | 148543715 | EZH2    | 693_selected_genes |
| chr7  | 148544248 | 148544415 | EZH2    | 693_selected_genes |
| chr4  | 84383596  | 84384080  | FAM175A | 693_selected_genes |
| chr4  | 84384621  | 84384786  | FAM175A | 693_selected_genes |
| chr4  | 84388581  | 84388716  | FAM175A | 693_selected_genes |
| chr4  | 84390159  | 84390329  | FAM175A | 693_selected_genes |
| chr4  | 84391330  | 84391574  | FAM175A | 693_selected_genes |
| chr4  | 84393349  | 84393466  | FAM175A | 693_selected_genes |
| chr4  | 84397770  | 84397857  | FAM175A | 693_selected_genes |
| chr4  | 84401274  | 84401546  | FAM175A | 693_selected_genes |
| chr4  | 84403281  | 84403422  | FAM175A | 693_selected_genes |
| chr4  | 84405267  | 84405344  | FAM175A | 693_selected_genes |
| chr4  | 84406113  | 84406250  | FAM175A | 693_selected_genes |
| chr1  | 118165465 | 118166691 | FAM46C  | 693_selected_genes |
| chr16 | 89804983  | 89805722  | FANCA   | 693_selected_genes |
| chr16 | 89805860  | 89805986  | FANCA   | 693_selected_genes |
| chr16 | 89806376  | 89806532  | FANCA   | 693_selected_genes |
| chr16 | 89807186  | 89807299  | FANCA   | 693_selected_genes |
| chr16 | 89809182  | 89809371  | FANCA   | 693_selected_genes |
| chr16 | 89811341  | 89811504  | FANCA   | 693_selected_genes |
| chr16 | 89812966  | 89813121  | FANCA   | 693_selected_genes |
| chr16 | 89813213  | 89813323  | FANCA   | 693_selected_genes |
| chr16 | 89815041  | 89815200  | FANCA   | 693_selected_genes |
| chr16 | 89816112  | 89816335  | FANCA   | 693_selected_genes |
| chr16 | 89818520  | 89818655  | FANCA   | 693_selected_genes |

|       |          |          |        |                    |
|-------|----------|----------|--------|--------------------|
| chr16 | 89824959 | 89825138 | FANCA  | 693_selected_genes |
| chr16 | 89828331 | 89828455 | FANCA  | 693_selected_genes |
| chr16 | 89829128 | 89829226 | FANCA  | 693_selected_genes |
| chr16 | 89831189 | 89831499 | FANCA  | 693_selected_genes |
| chr16 | 89833523 | 89833670 | FANCA  | 693_selected_genes |
| chr16 | 89836215 | 89836457 | FANCA  | 693_selected_genes |
| chr16 | 89836548 | 89836692 | FANCA  | 693_selected_genes |
| chr16 | 89836946 | 89837067 | FANCA  | 693_selected_genes |
| chr16 | 89838060 | 89838247 | FANCA  | 693_selected_genes |
| chr16 | 89839653 | 89839817 | FANCA  | 693_selected_genes |
| chr16 | 89842124 | 89842248 | FANCA  | 693_selected_genes |
| chr16 | 89844739 | 89844895 | FANCA  | 693_selected_genes |
| chr16 | 89845183 | 89845283 | FANCA  | 693_selected_genes |
| chr16 | 89845325 | 89845436 | FANCA  | 693_selected_genes |
| chr16 | 89846251 | 89846390 | FANCA  | 693_selected_genes |
| chr16 | 89849241 | 89849351 | FANCA  | 693_selected_genes |
| chr16 | 89849389 | 89849535 | FANCA  | 693_selected_genes |
| chr16 | 89851236 | 89851397 | FANCA  | 693_selected_genes |
| chr16 | 89857785 | 89857969 | FANCA  | 693_selected_genes |
| chr16 | 89858309 | 89858501 | FANCA  | 693_selected_genes |
| chr16 | 89858853 | 89858980 | FANCA  | 693_selected_genes |
| chr16 | 89862288 | 89862451 | FANCA  | 693_selected_genes |
| chr16 | 89865440 | 89865665 | FANCA  | 693_selected_genes |
| chr16 | 89865987 | 89866071 | FANCA  | 693_selected_genes |
| chr16 | 89869641 | 89869774 | FANCA  | 693_selected_genes |
| chr16 | 89871662 | 89871825 | FANCA  | 693_selected_genes |
| chr16 | 89874676 | 89874800 | FANCA  | 693_selected_genes |
| chr16 | 89877089 | 89877235 | FANCA  | 693_selected_genes |
| chr16 | 89877311 | 89877504 | FANCA  | 693_selected_genes |
| chr16 | 89880902 | 89881046 | FANCA  | 693_selected_genes |
| chr16 | 89882259 | 89882419 | FANCA  | 693_selected_genes |
| chr16 | 89882521 | 89883048 | FANCA  | 693_selected_genes |
| chr9  | 97863963 | 97864157 | FANCC  | 693_selected_genes |
| chr9  | 97869322 | 97869576 | FANCC  | 693_selected_genes |
| chr9  | 97873452 | 97873652 | FANCC  | 693_selected_genes |
| chr9  | 97873719 | 97873944 | FANCC  | 693_selected_genes |
| chr9  | 97876885 | 97877017 | FANCC  | 693_selected_genes |
| chr9  | 97879571 | 97879697 | FANCC  | 693_selected_genes |
| chr9  | 97887342 | 97887492 | FANCC  | 693_selected_genes |
| chr9  | 97888785 | 97888888 | FANCC  | 693_selected_genes |
| chr9  | 97897602 | 97897809 | FANCC  | 693_selected_genes |
| chr9  | 97912179 | 97912394 | FANCC  | 693_selected_genes |
| chr9  | 97933335 | 97933450 | FANCC  | 693_selected_genes |
| chr9  | 97934293 | 97934454 | FANCC  | 693_selected_genes |
| chr9  | 98002905 | 98003050 | FANCC  | 693_selected_genes |
| chr9  | 98009688 | 98009823 | FANCC  | 693_selected_genes |
| chr9  | 98011383 | 98011598 | FANCC  | 693_selected_genes |
| chr3  | 10070316 | 10070430 | FANCD2 | 693_selected_genes |
| chr3  | 10073957 | 10074060 | FANCD2 | 693_selected_genes |
| chr3  | 10074490 | 10074681 | FANCD2 | 693_selected_genes |
| chr3  | 10076127 | 10076245 | FANCD2 | 693_selected_genes |
| chr3  | 10076353 | 10076507 | FANCD2 | 693_selected_genes |
| chr3  | 10076831 | 10076942 | FANCD2 | 693_selected_genes |
| chr3  | 10077945 | 10078048 | FANCD2 | 693_selected_genes |
| chr3  | 10080937 | 10081066 | FANCD2 | 693_selected_genes |
| chr3  | 10081379 | 10081585 | FANCD2 | 693_selected_genes |
| chr3  | 10082195 | 10082249 | FANCD2 | 693_selected_genes |
| chr3  | 10083281 | 10083419 | FANCD2 | 693_selected_genes |
| chr3  | 10084217 | 10084372 | FANCD2 | 693_selected_genes |
| chr3  | 10084708 | 10084859 | FANCD2 | 693_selected_genes |
| chr3  | 10085142 | 10085301 | FANCD2 | 693_selected_genes |
| chr3  | 10085487 | 10085573 | FANCD2 | 693_selected_genes |
| chr3  | 10088238 | 10088432 | FANCD2 | 693_selected_genes |
| chr3  | 10089575 | 10089760 | FANCD2 | 693_selected_genes |
| chr3  | 10091032 | 10091214 | FANCD2 | 693_selected_genes |
| chr3  | 10094045 | 10094206 | FANCD2 | 693_selected_genes |
| chr3  | 10101952 | 10102112 | FANCD2 | 693_selected_genes |
| chr3  | 10103809 | 10103920 | FANCD2 | 693_selected_genes |
| chr3  | 10105450 | 10105620 | FANCD2 | 693_selected_genes |
| chr3  | 10106014 | 10106138 | FANCD2 | 693_selected_genes |
| chr3  | 10106387 | 10106584 | FANCD2 | 693_selected_genes |
| chr3  | 10107052 | 10107203 | FANCD2 | 693_selected_genes |
| chr3  | 10107522 | 10107688 | FANCD2 | 693_selected_genes |
| chr3  | 10108867 | 10109026 | FANCD2 | 693_selected_genes |
| chr3  | 10114529 | 10114690 | FANCD2 | 693_selected_genes |
| chr3  | 10114911 | 10115071 | FANCD2 | 693_selected_genes |
| chr3  | 10116188 | 10116382 | FANCD2 | 693_selected_genes |
| chr3  | 10119739 | 10119906 | FANCD2 | 693_selected_genes |
| chr3  | 10122758 | 10122937 | FANCD2 | 693_selected_genes |
| chr3  | 10123004 | 10123173 | FANCD2 | 693_selected_genes |
| chr3  | 10127470 | 10127631 | FANCD2 | 693_selected_genes |
| chr3  | 10128792 | 10128973 | FANCD2 | 693_selected_genes |
| chr3  | 10130107 | 10130251 | FANCD2 | 693_selected_genes |
| chr3  | 10130486 | 10130659 | FANCD2 | 693_selected_genes |

|       |          |          |        |                    |
|-------|----------|----------|--------|--------------------|
| chr3  | 10131950 | 10132094 | FANCD2 | 693_selected_genes |
| chr3  | 10133839 | 10133961 | FANCD2 | 693_selected_genes |
| chr3  | 10134943 | 10135032 | FANCD2 | 693_selected_genes |
| chr3  | 10135947 | 10136072 | FANCD2 | 693_selected_genes |
| chr3  | 10136858 | 10136983 | FANCD2 | 693_selected_genes |
| chr3  | 10137984 | 10138181 | FANCD2 | 693_selected_genes |
| chr3  | 10140378 | 10140659 | FANCD2 | 693_selected_genes |
| chr3  | 10142846 | 10142971 | FANCD2 | 693_selected_genes |
| chr6  | 35420297 | 35420595 | FANCE  | 693_selected_genes |
| chr6  | 35423498 | 35424155 | FANCE  | 693_selected_genes |
| chr6  | 35425307 | 35425402 | FANCE  | 693_selected_genes |
| chr6  | 35425667 | 35425786 | FANCE  | 693_selected_genes |
| chr6  | 35426048 | 35426242 | FANCE  | 693_selected_genes |
| chr6  | 35427082 | 35427256 | FANCE  | 693_selected_genes |
| chr6  | 35427433 | 35427562 | FANCE  | 693_selected_genes |
| chr6  | 35428303 | 35428420 | FANCE  | 693_selected_genes |
| chr6  | 35430540 | 35430716 | FANCE  | 693_selected_genes |
| chr6  | 35433995 | 35434147 | FANCE  | 693_selected_genes |
| chr11 | 22646206 | 22647381 | FANCF  | 693_selected_genes |
| chr9  | 35074079 | 35074238 | FANCG  | 693_selected_genes |
| chr9  | 35074342 | 35074516 | FANCG  | 693_selected_genes |
| chr9  | 35074898 | 35075104 | FANCG  | 693_selected_genes |
| chr9  | 35075250 | 35075347 | FANCG  | 693_selected_genes |
| chr9  | 35075436 | 35075776 | FANCG  | 693_selected_genes |
| chr9  | 35075933 | 35076050 | FANCG  | 693_selected_genes |
| chr9  | 35076403 | 35076605 | FANCG  | 693_selected_genes |
| chr9  | 35076695 | 35076892 | FANCG  | 693_selected_genes |
| chr9  | 35076942 | 35077123 | FANCG  | 693_selected_genes |
| chr9  | 35077235 | 35077421 | FANCG  | 693_selected_genes |
| chr9  | 35078112 | 35078365 | FANCG  | 693_selected_genes |
| chr9  | 35078576 | 35078758 | FANCG  | 693_selected_genes |
| chr9  | 35079122 | 35079263 | FANCG  | 693_selected_genes |
| chr9  | 35079412 | 35079546 | FANCG  | 693_selected_genes |
| chr15 | 89790853 | 89790987 | FANCI  | 693_selected_genes |
| chr15 | 89801909 | 89802032 | FANCI  | 693_selected_genes |
| chr15 | 89803918 | 89804099 | FANCI  | 693_selected_genes |
| chr15 | 89804790 | 89804997 | FANCI  | 693_selected_genes |
| chr15 | 89805026 | 89805134 | FANCI  | 693_selected_genes |
| chr15 | 89806624 | 89806716 | FANCI  | 693_selected_genes |
| chr15 | 89807108 | 89807293 | FANCI  | 693_selected_genes |
| chr15 | 89807727 | 89807867 | FANCI  | 693_selected_genes |
| chr15 | 89811604 | 89811799 | FANCI  | 693_selected_genes |
| chr15 | 89816582 | 89816725 | FANCI  | 693_selected_genes |
| chr15 | 89817373 | 89817560 | FANCI  | 693_selected_genes |
| chr15 | 89819916 | 89820147 | FANCI  | 693_selected_genes |
| chr15 | 89821892 | 89822030 | FANCI  | 693_selected_genes |
| chr15 | 89824375 | 89824556 | FANCI  | 693_selected_genes |
| chr15 | 89824970 | 89825091 | FANCI  | 693_selected_genes |
| chr15 | 89826341 | 89826506 | FANCI  | 693_selected_genes |
| chr15 | 89828301 | 89828474 | FANCI  | 693_selected_genes |
| chr15 | 89833418 | 89833537 | FANCI  | 693_selected_genes |
| chr15 | 89834818 | 89834970 | FANCI  | 693_selected_genes |
| chr15 | 89835893 | 89836120 | FANCI  | 693_selected_genes |
| chr15 | 89836147 | 89836319 | FANCI  | 693_selected_genes |
| chr15 | 89837038 | 89837253 | FANCI  | 693_selected_genes |
| chr15 | 89838120 | 89838350 | FANCI  | 693_selected_genes |
| chr15 | 89843005 | 89843222 | FANCI  | 693_selected_genes |
| chr15 | 89843505 | 89843641 | FANCI  | 693_selected_genes |
| chr15 | 89844531 | 89844698 | FANCI  | 693_selected_genes |
| chr15 | 89847069 | 89847171 | FANCI  | 693_selected_genes |
| chr15 | 89848320 | 89848498 | FANCI  | 693_selected_genes |
| chr15 | 89848546 | 89848665 | FANCI  | 693_selected_genes |
| chr15 | 89848810 | 89848954 | FANCI  | 693_selected_genes |
| chr15 | 89849212 | 89849450 | FANCI  | 693_selected_genes |
| chr15 | 89850681 | 89850785 | FANCI  | 693_selected_genes |
| chr15 | 89850818 | 89850928 | FANCI  | 693_selected_genes |
| chr15 | 89856109 | 89856228 | FANCI  | 693_selected_genes |
| chr15 | 89857817 | 89857963 | FANCI  | 693_selected_genes |
| chr15 | 89858487 | 89858645 | FANCI  | 693_selected_genes |
| chr15 | 89859602 | 89859715 | FANCI  | 693_selected_genes |
| chr2  | 58386874 | 58386960 | FANCL  | 693_selected_genes |
| chr2  | 58387217 | 58387339 | FANCL  | 693_selected_genes |
| chr2  | 58388631 | 58388798 | FANCL  | 693_selected_genes |
| chr2  | 58389975 | 58390107 | FANCL  | 693_selected_genes |
| chr2  | 58390134 | 58390234 | FANCL  | 693_selected_genes |
| chr2  | 58390543 | 58390677 | FANCL  | 693_selected_genes |
| chr2  | 58392833 | 58393034 | FANCL  | 693_selected_genes |
| chr2  | 58421338 | 58421433 | FANCL  | 693_selected_genes |
| chr2  | 58425688 | 58425822 | FANCL  | 693_selected_genes |
| chr2  | 58431239 | 58431386 | FANCL  | 693_selected_genes |
| chr2  | 58449051 | 58449202 | FANCL  | 693_selected_genes |
| chr2  | 58453837 | 58453944 | FANCL  | 693_selected_genes |
| chr2  | 58456923 | 58457034 | FANCL  | 693_selected_genes |
| chr2  | 58459163 | 58459272 | FANCL  | 693_selected_genes |

|       |           |           |       |                    |
|-------|-----------|-----------|-------|--------------------|
| chr2  | 58468327  | 58468473  | FANCL | 693_selected_genes |
| chr14 | 45605209  | 45605767  | FANCM | 693_selected_genes |
| chr14 | 45606246  | 45606469  | FANCM | 693_selected_genes |
| chr14 | 45609809  | 45609937  | FANCM | 693_selected_genes |
| chr14 | 45618014  | 45618223  | FANCM | 693_selected_genes |
| chr14 | 45620574  | 45620756  | FANCM | 693_selected_genes |
| chr14 | 45623097  | 45623280  | FANCM | 693_selected_genes |
| chr14 | 45623874  | 45624050  | FANCM | 693_selected_genes |
| chr14 | 45624550  | 45624687  | FANCM | 693_selected_genes |
| chr14 | 45628273  | 45628508  | FANCM | 693_selected_genes |
| chr14 | 45633536  | 45633793  | FANCM | 693_selected_genes |
| chr14 | 45636127  | 45636399  | FANCM | 693_selected_genes |
| chr14 | 45639766  | 45639974  | FANCM | 693_selected_genes |
| chr14 | 45642232  | 45642438  | FANCM | 693_selected_genes |
| chr14 | 45644248  | 45646204  | FANCM | 693_selected_genes |
| chr14 | 45650607  | 45650752  | FANCM | 693_selected_genes |
| chr14 | 45650814  | 45650933  | FANCM | 693_selected_genes |
| chr14 | 45652951  | 45653130  | FANCM | 693_selected_genes |
| chr14 | 45654394  | 45654601  | FANCM | 693_selected_genes |
| chr14 | 45656958  | 45657115  | FANCM | 693_selected_genes |
| chr14 | 45657979  | 45658590  | FANCM | 693_selected_genes |
| chr14 | 45664658  | 45664813  | FANCM | 693_selected_genes |
| chr14 | 45665349  | 45665775  | FANCM | 693_selected_genes |
| chr14 | 45667821  | 45668163  | FANCM | 693_selected_genes |
| chr14 | 45669047  | 45669236  | FANCM | 693_selected_genes |
| chr10 | 90750608  | 90750688  | FAS   | 693_selected_genes |
| chr10 | 90762760  | 90762976  | FAS   | 693_selected_genes |
| chr10 | 90767431  | 90767619  | FAS   | 693_selected_genes |
| chr10 | 90768620  | 90768779  | FAS   | 693_selected_genes |
| chr10 | 90770270  | 90770382  | FAS   | 693_selected_genes |
| chr10 | 90770484  | 90770597  | FAS   | 693_selected_genes |
| chr10 | 90771730  | 90771863  | FAS   | 693_selected_genes |
| chr10 | 90773074  | 90773149  | FAS   | 693_selected_genes |
| chr10 | 90773831  | 90774232  | FAS   | 693_selected_genes |
| chr4  | 187509720 | 187510399 | FAT1  | 693_selected_genes |
| chr4  | 187511496 | 187511582 | FAT1  | 693_selected_genes |
| chr4  | 187511674 | 187511874 | FAT1  | 693_selected_genes |
| chr4  | 187513821 | 187513931 | FAT1  | 693_selected_genes |
| chr4  | 187516817 | 187517005 | FAT1  | 693_selected_genes |
| chr4  | 187517668 | 187518350 | FAT1  | 693_selected_genes |
| chr4  | 187518810 | 187518971 | FAT1  | 693_selected_genes |
| chr4  | 187519100 | 187519304 | FAT1  | 693_selected_genes |
| chr4  | 187521026 | 187521539 | FAT1  | 693_selected_genes |
| chr4  | 187522397 | 187522605 | FAT1  | 693_selected_genes |
| chr4  | 187524031 | 187524213 | FAT1  | 693_selected_genes |
| chr4  | 187524304 | 187525156 | FAT1  | 693_selected_genes |
| chr4  | 187525505 | 187525753 | FAT1  | 693_selected_genes |
| chr4  | 187527198 | 187527392 | FAT1  | 693_selected_genes |
| chr4  | 187530311 | 187530499 | FAT1  | 693_selected_genes |
| chr4  | 187530929 | 187531194 | FAT1  | 693_selected_genes |
| chr4  | 187532514 | 187532954 | FAT1  | 693_selected_genes |
| chr4  | 187534237 | 187534521 | FAT1  | 693_selected_genes |
| chr4  | 187535319 | 187535523 | FAT1  | 693_selected_genes |
| chr4  | 187538133 | 187538380 | FAT1  | 693_selected_genes |
| chr4  | 187538836 | 187542954 | FAT1  | 693_selected_genes |
| chr4  | 187549282 | 187549543 | FAT1  | 693_selected_genes |
| chr4  | 187549616 | 187549942 | FAT1  | 693_selected_genes |
| chr4  | 187554812 | 187555002 | FAT1  | 693_selected_genes |
| chr4  | 187557153 | 187557414 | FAT1  | 693_selected_genes |
| chr4  | 187557713 | 187558093 | FAT1  | 693_selected_genes |
| chr4  | 187560850 | 187560962 | FAT1  | 693_selected_genes |
| chr4  | 187584427 | 187584792 | FAT1  | 693_selected_genes |
| chr4  | 187627691 | 187631006 | FAT1  | 693_selected_genes |
| chr11 | 92085253  | 92088595  | FAT3  | 693_selected_genes |
| chr11 | 92257774  | 92258139  | FAT3  | 693_selected_genes |
| chr11 | 92292550  | 92292758  | FAT3  | 693_selected_genes |
| chr11 | 92430524  | 92430636  | FAT3  | 693_selected_genes |
| chr11 | 92494996  | 92495361  | FAT3  | 693_selected_genes |
| chr11 | 92498019  | 92498280  | FAT3  | 693_selected_genes |
| chr11 | 92507181  | 92507371  | FAT3  | 693_selected_genes |
| chr11 | 92523083  | 92523409  | FAT3  | 693_selected_genes |
| chr11 | 92525907  | 92526168  | FAT3  | 693_selected_genes |
| chr11 | 92530976  | 92535100  | FAT3  | 693_selected_genes |
| chr11 | 92538293  | 92538540  | FAT3  | 693_selected_genes |
| chr11 | 92539502  | 92539706  | FAT3  | 693_selected_genes |
| chr11 | 92542983  | 92543267  | FAT3  | 693_selected_genes |
| chr11 | 92564762  | 92565202  | FAT3  | 693_selected_genes |
| chr11 | 92568010  | 92568275  | FAT3  | 693_selected_genes |
| chr11 | 92569706  | 92569894  | FAT3  | 693_selected_genes |
| chr11 | 92570803  | 92570997  | FAT3  | 693_selected_genes |
| chr11 | 92573702  | 92573950  | FAT3  | 693_selected_genes |
| chr11 | 92577074  | 92577923  | FAT3  | 693_selected_genes |
| chr11 | 92590354  | 92590539  | FAT3  | 693_selected_genes |
| chr11 | 92592305  | 92592513  | FAT3  | 693_selected_genes |

|       |          |          |        |                    |
|-------|----------|----------|--------|--------------------|
| chr11 | 92599881 | 92600400 | FAT3   | 693_selected_genes |
| chr11 | 92613871 | 92614075 | FAT3   | 693_selected_genes |
| chr11 | 92615878 | 92616584 | FAT3   | 693_selected_genes |
| chr11 | 92620140 | 92620304 | FAT3   | 693_selected_genes |
| chr11 | 92622329 | 92622439 | FAT3   | 693_selected_genes |
| chr11 | 92622996 | 92623082 | FAT3   | 693_selected_genes |
| chr11 | 92623631 | 92624304 | FAT3   | 693_selected_genes |
| chr15 | 48703161 | 48703601 | FBN1   | 693_selected_genes |
| chr15 | 48704740 | 48704965 | FBN1   | 693_selected_genes |
| chr15 | 48707707 | 48707989 | FBN1   | 693_selected_genes |
| chr15 | 48712858 | 48713028 | FBN1   | 693_selected_genes |
| chr15 | 48713729 | 48713908 | FBN1   | 693_selected_genes |
| chr15 | 48714123 | 48714290 | FBN1   | 693_selected_genes |
| chr15 | 48717540 | 48717713 | FBN1   | 693_selected_genes |
| chr15 | 48717910 | 48718086 | FBN1   | 693_selected_genes |
| chr15 | 48719738 | 48719995 | FBN1   | 693_selected_genes |
| chr15 | 48720053 | 48720165 | FBN1   | 693_selected_genes |
| chr15 | 48720517 | 48720693 | FBN1   | 693_selected_genes |
| chr15 | 48722842 | 48723024 | FBN1   | 693_selected_genes |
| chr15 | 48725037 | 48725210 | FBN1   | 693_selected_genes |
| chr15 | 48726765 | 48726935 | FBN1   | 693_selected_genes |
| chr15 | 48729132 | 48729299 | FBN1   | 693_selected_genes |
| chr15 | 48729493 | 48729609 | FBN1   | 693_selected_genes |
| chr15 | 48729939 | 48730139 | FBN1   | 693_selected_genes |
| chr15 | 48733892 | 48734068 | FBN1   | 693_selected_genes |
| chr15 | 48736712 | 48736882 | FBN1   | 693_selected_genes |
| chr15 | 48737547 | 48737726 | FBN1   | 693_selected_genes |
| chr15 | 48738877 | 48739044 | FBN1   | 693_selected_genes |
| chr15 | 48740939 | 48741115 | FBN1   | 693_selected_genes |
| chr15 | 48744733 | 48744906 | FBN1   | 693_selected_genes |
| chr15 | 48748808 | 48748984 | FBN1   | 693_selected_genes |
| chr15 | 48752417 | 48752539 | FBN1   | 693_selected_genes |
| chr15 | 48755253 | 48755462 | FBN1   | 693_selected_genes |
| chr15 | 48756070 | 48756243 | FBN1   | 693_selected_genes |
| chr15 | 48757739 | 48757915 | FBN1   | 693_selected_genes |
| chr15 | 48757961 | 48758080 | FBN1   | 693_selected_genes |
| chr15 | 48760109 | 48760324 | FBN1   | 693_selected_genes |
| chr15 | 48760583 | 48760756 | FBN1   | 693_selected_genes |
| chr15 | 48762805 | 48762978 | FBN1   | 693_selected_genes |
| chr15 | 48764722 | 48764898 | FBN1   | 693_selected_genes |
| chr15 | 48766426 | 48766599 | FBN1   | 693_selected_genes |
| chr15 | 48766699 | 48766872 | FBN1   | 693_selected_genes |
| chr15 | 48773826 | 48774002 | FBN1   | 693_selected_genes |
| chr15 | 48775989 | 48776165 | FBN1   | 693_selected_genes |
| chr15 | 48777545 | 48777718 | FBN1   | 693_selected_genes |
| chr15 | 48779246 | 48779422 | FBN1   | 693_selected_genes |
| chr15 | 48779483 | 48779659 | FBN1   | 693_selected_genes |
| chr15 | 48780284 | 48780463 | FBN1   | 693_selected_genes |
| chr15 | 48780539 | 48780715 | FBN1   | 693_selected_genes |
| chr15 | 48782022 | 48782300 | FBN1   | 693_selected_genes |
| chr15 | 48784632 | 48784808 | FBN1   | 693_selected_genes |
| chr15 | 48786375 | 48786476 | FBN1   | 693_selected_genes |
| chr15 | 48787294 | 48787482 | FBN1   | 693_selected_genes |
| chr15 | 48787640 | 48787810 | FBN1   | 693_selected_genes |
| chr15 | 48788271 | 48788447 | FBN1   | 693_selected_genes |
| chr15 | 48789437 | 48789613 | FBN1   | 693_selected_genes |
| chr15 | 48791156 | 48791260 | FBN1   | 693_selected_genes |
| chr15 | 48795958 | 48796161 | FBN1   | 693_selected_genes |
| chr15 | 48797196 | 48797369 | FBN1   | 693_selected_genes |
| chr15 | 48800753 | 48800926 | FBN1   | 693_selected_genes |
| chr15 | 48802215 | 48802391 | FBN1   | 693_selected_genes |
| chr15 | 48805720 | 48805890 | FBN1   | 693_selected_genes |
| chr15 | 48807558 | 48807749 | FBN1   | 693_selected_genes |
| chr15 | 48808354 | 48808584 | FBN1   | 693_selected_genes |
| chr15 | 48812830 | 48813039 | FBN1   | 693_selected_genes |
| chr15 | 48818301 | 48818477 | FBN1   | 693_selected_genes |
| chr15 | 48826251 | 48826427 | FBN1   | 693_selected_genes |
| chr15 | 48829782 | 48830030 | FBN1   | 693_selected_genes |
| chr15 | 48888454 | 48888600 | FBN1   | 693_selected_genes |
| chr15 | 48892310 | 48892456 | FBN1   | 693_selected_genes |
| chr15 | 48902899 | 48903048 | FBN1   | 693_selected_genes |
| chr15 | 48905181 | 48905314 | FBN1   | 693_selected_genes |
| chr15 | 48936773 | 48936991 | FBN1   | 693_selected_genes |
| chr2  | 48016549 | 48016604 | FBXO11 | 693_selected_genes |
| chr2  | 48035231 | 48035411 | FBXO11 | 693_selected_genes |
| chr2  | 48035442 | 48035591 | FBXO11 | 693_selected_genes |
| chr2  | 48036271 | 48036430 | FBXO11 | 693_selected_genes |
| chr2  | 48036713 | 48036871 | FBXO11 | 693_selected_genes |
| chr2  | 48037429 | 48037590 | FBXO11 | 693_selected_genes |
| chr2  | 48040261 | 48040541 | FBXO11 | 693_selected_genes |
| chr2  | 48040904 | 48041031 | FBXO11 | 693_selected_genes |
| chr2  | 48045892 | 48046028 | FBXO11 | 693_selected_genes |
| chr2  | 48046069 | 48046242 | FBXO11 | 693_selected_genes |
| chr2  | 48047475 | 48047620 | FBXO11 | 693_selected_genes |

|       |           |           |        |                    |
|-------|-----------|-----------|--------|--------------------|
| chr2  | 48049331  | 48049467  | FBXO11 | 693_selected_genes |
| chr2  | 48050256  | 48050524  | FBXO11 | 693_selected_genes |
| chr2  | 48059462  | 48059650  | FBXO11 | 693_selected_genes |
| chr2  | 48059685  | 48059842  | FBXO11 | 693_selected_genes |
| chr2  | 48059882  | 48060044  | FBXO11 | 693_selected_genes |
| chr2  | 48060077  | 48060234  | FBXO11 | 693_selected_genes |
| chr2  | 48061692  | 48061875  | FBXO11 | 693_selected_genes |
| chr2  | 48061901  | 48062035  | FBXO11 | 693_selected_genes |
| chr2  | 48062985  | 48063165  | FBXO11 | 693_selected_genes |
| chr2  | 48064101  | 48064200  | FBXO11 | 693_selected_genes |
| chr2  | 48065972  | 48066167  | FBXO11 | 693_selected_genes |
| chr2  | 48066532  | 48066664  | FBXO11 | 693_selected_genes |
| chr2  | 48066755  | 48066933  | FBXO11 | 693_selected_genes |
| chr2  | 48132602  | 48132884  | FBXO11 | 693_selected_genes |
| chr4  | 153244007 | 153244326 | FBXW7  | 693_selected_genes |
| chr4  | 153245310 | 153245571 | FBXW7  | 693_selected_genes |
| chr4  | 153247132 | 153247408 | FBXW7  | 693_selected_genes |
| chr4  | 153249334 | 153249566 | FBXW7  | 693_selected_genes |
| chr4  | 153250798 | 153250962 | FBXW7  | 693_selected_genes |
| chr4  | 153251858 | 153252045 | FBXW7  | 693_selected_genes |
| chr4  | 153253722 | 153253896 | FBXW7  | 693_selected_genes |
| chr4  | 153258928 | 153259113 | FBXW7  | 693_selected_genes |
| chr4  | 153268056 | 153268248 | FBXW7  | 693_selected_genes |
| chr4  | 153269800 | 153269906 | FBXW7  | 693_selected_genes |
| chr4  | 153271168 | 153271301 | FBXW7  | 693_selected_genes |
| chr4  | 153273596 | 153273907 | FBXW7  | 693_selected_genes |
| chr4  | 153303315 | 153303512 | FBXW7  | 693_selected_genes |
| chr4  | 153332399 | 153332980 | FBXW7  | 693_selected_genes |
| chr15 | 91428250  | 91428840  | FES    | 693_selected_genes |
| chr15 | 91430165  | 91430312  | FES    | 693_selected_genes |
| chr15 | 91430391  | 91430625  | FES    | 693_selected_genes |
| chr15 | 91432510  | 91432698  | FES    | 693_selected_genes |
| chr15 | 91432721  | 91432891  | FES    | 693_selected_genes |
| chr15 | 91433044  | 91433217  | FES    | 693_selected_genes |
| chr15 | 91433296  | 91433533  | FES    | 693_selected_genes |
| chr15 | 91433570  | 91433739  | FES    | 693_selected_genes |
| chr15 | 91434186  | 91434446  | FES    | 693_selected_genes |
| chr15 | 91434704  | 91434931  | FES    | 693_selected_genes |
| chr15 | 91435262  | 91435366  | FES    | 693_selected_genes |
| chr15 | 91435911  | 91436080  | FES    | 693_selected_genes |
| chr15 | 91436304  | 91436449  | FES    | 693_selected_genes |
| chr15 | 91436476  | 91436669  | FES    | 693_selected_genes |
| chr15 | 91436858  | 91437066  | FES    | 693_selected_genes |
| chr15 | 91437140  | 91437313  | FES    | 693_selected_genes |
| chr15 | 91438620  | 91438813  | FES    | 693_selected_genes |
| chr5  | 44305071  | 44305319  | FGF10  | 693_selected_genes |
| chr5  | 44310503  | 44310657  | FGF10  | 693_selected_genes |
| chr5  | 44388434  | 44388809  | FGF10  | 693_selected_genes |
| chr3  | 191861772 | 191861941 | FGF12  | 693_selected_genes |
| chr3  | 191888221 | 191888470 | FGF12  | 693_selected_genes |
| chr3  | 191986414 | 191986563 | FGF12  | 693_selected_genes |
| chr3  | 192053124 | 192053278 | FGF12  | 693_selected_genes |
| chr3  | 192078191 | 192078352 | FGF12  | 693_selected_genes |
| chr3  | 192125788 | 192126037 | FGF12  | 693_selected_genes |
| chr3  | 192444944 | 192445007 | FGF12  | 693_selected_genes |
| chr13 | 102375155 | 102375342 | FGF14  | 693_selected_genes |
| chr13 | 102378936 | 102379185 | FGF14  | 693_selected_genes |
| chr13 | 102521049 | 102521203 | FGF14  | 693_selected_genes |
| chr13 | 102527510 | 102527671 | FGF14  | 693_selected_genes |
| chr13 | 102568777 | 102569020 | FGF14  | 693_selected_genes |
| chr13 | 103053795 | 103054053 | FGF14  | 693_selected_genes |
| chr11 | 69514004  | 69514369  | FGF19  | 693_selected_genes |
| chr11 | 69518003  | 69518157  | FGF19  | 693_selected_genes |
| chr11 | 69518387  | 69518669  | FGF19  | 693_selected_genes |
| chr12 | 4479483   | 4479974   | FGF23  | 693_selected_genes |
| chr12 | 4481734   | 4481888   | FGF23  | 693_selected_genes |
| chr12 | 4488512   | 4488773   | FGF23  | 693_selected_genes |
| chr11 | 69625047  | 69625493  | FGF3   | 693_selected_genes |
| chr11 | 69631062  | 69631216  | FGF3   | 693_selected_genes |
| chr11 | 69633456  | 69633726  | FGF3   | 693_selected_genes |
| chr11 | 69588051  | 69588278  | FGF4   | 693_selected_genes |
| chr11 | 69588766  | 69588920  | FGF4   | 693_selected_genes |
| chr11 | 69589487  | 69589877  | FGF4   | 693_selected_genes |
| chr12 | 4537535   | 4537594   | FGF6   | 693_selected_genes |
| chr12 | 4543355   | 4543582   | FGF6   | 693_selected_genes |
| chr12 | 4553273   | 4553427   | FGF6   | 693_selected_genes |
| chr12 | 4554365   | 4554761   | FGF6   | 693_selected_genes |
| chr15 | 49716469  | 49716813  | FGF7   | 693_selected_genes |
| chr15 | 49775322  | 49775476  | FGF7   | 693_selected_genes |
| chr15 | 49776481  | 49776726  | FGF7   | 693_selected_genes |
| chr4  | 15937525  | 15938280  | FGFBP1 | 693_selected_genes |
| chr8  | 38271120  | 38271347  | FGFR1  | 693_selected_genes |
| chr8  | 38271410  | 38271577  | FGFR1  | 693_selected_genes |
| chr8  | 38271644  | 38271832  | FGFR1  | 693_selected_genes |

|       |           |           |       |                    |
|-------|-----------|-----------|-------|--------------------|
| chr8  | 38272051  | 38272172  | FGFR1 | 693_selected_genes |
| chr8  | 38272271  | 38272444  | FGFR1 | 693_selected_genes |
| chr8  | 38273362  | 38273603  | FGFR1 | 693_selected_genes |
| chr8  | 38274798  | 38274959  | FGFR1 | 693_selected_genes |
| chr8  | 38275362  | 38275534  | FGFR1 | 693_selected_genes |
| chr8  | 38275720  | 38275916  | FGFR1 | 693_selected_genes |
| chr8  | 38277025  | 38277278  | FGFR1 | 693_selected_genes |
| chr8  | 38279289  | 38279484  | FGFR1 | 693_selected_genes |
| chr8  | 38280517  | 38280718  | FGFR1 | 693_selected_genes |
| chr8  | 38282001  | 38282242  | FGFR1 | 693_selected_genes |
| chr8  | 38283614  | 38283788  | FGFR1 | 693_selected_genes |
| chr8  | 38285413  | 38285636  | FGFR1 | 693_selected_genes |
| chr8  | 38285838  | 38285987  | FGFR1 | 693_selected_genes |
| chr8  | 38286788  | 38286933  | FGFR1 | 693_selected_genes |
| chr8  | 38287174  | 38287491  | FGFR1 | 693_selected_genes |
| chr8  | 38297798  | 38297915  | FGFR1 | 693_selected_genes |
| chr8  | 38314848  | 38315077  | FGFR1 | 693_selected_genes |
| chr8  | 38318588  | 38318649  | FGFR1 | 693_selected_genes |
| chr10 | 123239069 | 123239209 | FGFR2 | 693_selected_genes |
| chr10 | 123239345 | 123239652 | FGFR2 | 693_selected_genes |
| chr10 | 123241660 | 123241716 | FGFR2 | 693_selected_genes |
| chr10 | 123243186 | 123243342 | FGFR2 | 693_selected_genes |
| chr10 | 123244883 | 123245071 | FGFR2 | 693_selected_genes |
| chr10 | 123246842 | 123246963 | FGFR2 | 693_selected_genes |
| chr10 | 123247479 | 123247652 | FGFR2 | 693_selected_genes |
| chr10 | 123256020 | 123256261 | FGFR2 | 693_selected_genes |
| chr10 | 123257983 | 123258144 | FGFR2 | 693_selected_genes |
| chr10 | 123260314 | 123260486 | FGFR2 | 693_selected_genes |
| chr10 | 123263278 | 123263480 | FGFR2 | 693_selected_genes |
| chr10 | 123274605 | 123274858 | FGFR2 | 693_selected_genes |
| chr10 | 123276807 | 123277002 | FGFR2 | 693_selected_genes |
| chr10 | 123278170 | 123278368 | FGFR2 | 693_selected_genes |
| chr10 | 123279467 | 123279708 | FGFR2 | 693_selected_genes |
| chr10 | 123285643 | 123285733 | FGFR2 | 693_selected_genes |
| chr10 | 123286217 | 123286291 | FGFR2 | 693_selected_genes |
| chr10 | 123297882 | 123297949 | FGFR2 | 693_selected_genes |
| chr10 | 123298080 | 123298254 | FGFR2 | 693_selected_genes |
| chr10 | 123310778 | 123310998 | FGFR2 | 693_selected_genes |
| chr10 | 123323990 | 123324118 | FGFR2 | 693_selected_genes |
| chr10 | 123324926 | 123325243 | FGFR2 | 693_selected_genes |
| chr10 | 123353197 | 123353356 | FGFR2 | 693_selected_genes |
| chr4  | 1795636   | 1795795   | FGFR3 | 693_selected_genes |
| chr4  | 1800955   | 1801275   | FGFR3 | 693_selected_genes |
| chr4  | 1801448   | 1801564   | FGFR3 | 693_selected_genes |
| chr4  | 1803068   | 1803288   | FGFR3 | 693_selected_genes |
| chr4  | 1803321   | 1803495   | FGFR3 | 693_selected_genes |
| chr4  | 1803536   | 1803777   | FGFR3 | 693_selected_genes |
| chr4  | 1804615   | 1804816   | FGFR3 | 693_selected_genes |
| chr4  | 1805393   | 1805588   | FGFR3 | 693_selected_genes |
| chr4  | 1806031   | 1806272   | FGFR3 | 693_selected_genes |
| chr4  | 1806522   | 1806721   | FGFR3 | 693_selected_genes |
| chr4  | 1807056   | 1807228   | FGFR3 | 693_selected_genes |
| chr4  | 1807260   | 1807421   | FGFR3 | 693_selected_genes |
| chr4  | 1807451   | 1807692   | FGFR3 | 693_selected_genes |
| chr4  | 1807752   | 1807925   | FGFR3 | 693_selected_genes |
| chr4  | 1807958   | 1808079   | FGFR3 | 693_selected_genes |
| chr4  | 1808247   | 1808435   | FGFR3 | 693_selected_genes |
| chr4  | 1808530   | 1808686   | FGFR3 | 693_selected_genes |
| chr4  | 1808817   | 1809040   | FGFR3 | 693_selected_genes |
| chr5  | 176516578 | 176516719 | FGFR4 | 693_selected_genes |
| chr5  | 176516833 | 176516966 | FGFR4 | 693_selected_genes |
| chr5  | 176517365 | 176517679 | FGFR4 | 693_selected_genes |
| chr5  | 176517720 | 176517851 | FGFR4 | 693_selected_genes |
| chr5  | 176517913 | 176518130 | FGFR4 | 693_selected_genes |
| chr5  | 176518660 | 176518834 | FGFR4 | 693_selected_genes |
| chr5  | 176519296 | 176519537 | FGFR4 | 693_selected_genes |
| chr5  | 176519621 | 176519810 | FGFR4 | 693_selected_genes |
| chr5  | 176520113 | 176520577 | FGFR4 | 693_selected_genes |
| chr5  | 176520629 | 176520801 | FGFR4 | 693_selected_genes |
| chr5  | 176522305 | 176522466 | FGFR4 | 693_selected_genes |
| chr5  | 176522508 | 176522749 | FGFR4 | 693_selected_genes |
| chr5  | 176523032 | 176523205 | FGFR4 | 693_selected_genes |
| chr5  | 176523262 | 176523383 | FGFR4 | 693_selected_genes |
| chr5  | 176523579 | 176523767 | FGFR4 | 693_selected_genes |
| chr5  | 176524267 | 176524423 | FGFR4 | 693_selected_genes |
| chr5  | 176524502 | 176524702 | FGFR4 | 693_selected_genes |
| chr1  | 241661102 | 241661295 | FH    | 693_selected_genes |
| chr1  | 241663711 | 241663915 | FH    | 693_selected_genes |
| chr1  | 241665717 | 241665895 | FH    | 693_selected_genes |
| chr1  | 241667316 | 241667570 | FH    | 693_selected_genes |
| chr1  | 241669277 | 241669493 | FH    | 693_selected_genes |
| chr1  | 241671877 | 241672110 | FH    | 693_selected_genes |
| chr1  | 241675241 | 241675468 | FH    | 693_selected_genes |
| chr1  | 241676877 | 241677038 | FH    | 693_selected_genes |

|       |           |           |      |                    |
|-------|-----------|-----------|------|--------------------|
| chr1  | 241680456 | 241680641 | FH   | 693_selected_genes |
| chr1  | 241682865 | 241683047 | FH   | 693_selected_genes |
| chr17 | 17116943  | 17117195  | FLCN | 693_selected_genes |
| chr17 | 17118273  | 17118429  | FLCN | 693_selected_genes |
| chr17 | 17118473  | 17118655  | FLCN | 693_selected_genes |
| chr17 | 17119668  | 17119842  | FLCN | 693_selected_genes |
| chr17 | 17120357  | 17120521  | FLCN | 693_selected_genes |
| chr17 | 17122307  | 17122548  | FLCN | 693_selected_genes |
| chr17 | 17124667  | 17124967  | FLCN | 693_selected_genes |
| chr17 | 17125789  | 17126000  | FLCN | 693_selected_genes |
| chr17 | 17127210  | 17127482  | FLCN | 693_selected_genes |
| chr17 | 17129266  | 17129661  | FLCN | 693_selected_genes |
| chr17 | 17131177  | 17131476  | FLCN | 693_selected_genes |
| chr13 | 28877278  | 28877530  | FLT1 | 693_selected_genes |
| chr13 | 28880789  | 28880934  | FLT1 | 693_selected_genes |
| chr13 | 28882954  | 28883089  | FLT1 | 693_selected_genes |
| chr13 | 28885701  | 28885894  | FLT1 | 693_selected_genes |
| chr13 | 28886104  | 28886260  | FLT1 | 693_selected_genes |
| chr13 | 28891609  | 28891759  | FLT1 | 693_selected_genes |
| chr13 | 28893534  | 28893696  | FLT1 | 693_selected_genes |
| chr13 | 28895574  | 28895747  | FLT1 | 693_selected_genes |
| chr13 | 28896373  | 28896521  | FLT1 | 693_selected_genes |
| chr13 | 28896567  | 28896639  | FLT1 | 693_selected_genes |
| chr13 | 28896901  | 28897108  | FLT1 | 693_selected_genes |
| chr13 | 28901573  | 28901712  | FLT1 | 693_selected_genes |
| chr13 | 28903726  | 28903890  | FLT1 | 693_selected_genes |
| chr13 | 28908136  | 28908291  | FLT1 | 693_selected_genes |
| chr13 | 28913279  | 28913462  | FLT1 | 693_selected_genes |
| chr13 | 28919556  | 28919713  | FLT1 | 693_selected_genes |
| chr13 | 28931665  | 28931847  | FLT1 | 693_selected_genes |
| chr13 | 28942689  | 28942825  | FLT1 | 693_selected_genes |
| chr13 | 28958996  | 28959193  | FLT1 | 693_selected_genes |
| chr13 | 28963812  | 28964266  | FLT1 | 693_selected_genes |
| chr13 | 28971071  | 28971230  | FLT1 | 693_selected_genes |
| chr13 | 28973155  | 28973280  | FLT1 | 693_selected_genes |
| chr13 | 28979891  | 28980056  | FLT1 | 693_selected_genes |
| chr13 | 29001270  | 29001480  | FLT1 | 693_selected_genes |
| chr13 | 29001863  | 29002083  | FLT1 | 693_selected_genes |
| chr13 | 29004161  | 29004329  | FLT1 | 693_selected_genes |
| chr13 | 29005247  | 29005472  | FLT1 | 693_selected_genes |
| chr13 | 29007930  | 29008117  | FLT1 | 693_selected_genes |
| chr13 | 29008169  | 29008382  | FLT1 | 693_selected_genes |
| chr13 | 29012332  | 29012507  | FLT1 | 693_selected_genes |
| chr13 | 29041014  | 29041291  | FLT1 | 693_selected_genes |
| chr13 | 29041632  | 29041779  | FLT1 | 693_selected_genes |
| chr13 | 29068891  | 29069005  | FLT1 | 693_selected_genes |
| chr13 | 28578163  | 28578336  | FLT3 | 693_selected_genes |
| chr13 | 28588563  | 28588719  | FLT3 | 693_selected_genes |
| chr13 | 28589268  | 28589418  | FLT3 | 693_selected_genes |
| chr13 | 28589701  | 28589863  | FLT3 | 693_selected_genes |
| chr13 | 28592569  | 28592751  | FLT3 | 693_selected_genes |
| chr13 | 28597461  | 28597639  | FLT3 | 693_selected_genes |
| chr13 | 28598972  | 28599105  | FLT3 | 693_selected_genes |
| chr13 | 28599514  | 28599577  | FLT3 | 693_selected_genes |
| chr13 | 28601199  | 28601403  | FLT3 | 693_selected_genes |
| chr13 | 28602289  | 28602450  | FLT3 | 693_selected_genes |
| chr13 | 28607998  | 28608153  | FLT3 | 693_selected_genes |
| chr13 | 28608193  | 28608376  | FLT3 | 693_selected_genes |
| chr13 | 28608412  | 28608569  | FLT3 | 693_selected_genes |
| chr13 | 28609606  | 28609835  | FLT3 | 693_selected_genes |
| chr13 | 28610046  | 28610205  | FLT3 | 693_selected_genes |
| chr13 | 28611296  | 28611450  | FLT3 | 693_selected_genes |
| chr13 | 28622386  | 28622605  | FLT3 | 693_selected_genes |
| chr13 | 28623495  | 28623699  | FLT3 | 693_selected_genes |
| chr13 | 28623746  | 28623936  | FLT3 | 693_selected_genes |
| chr13 | 28624206  | 28624384  | FLT3 | 693_selected_genes |
| chr13 | 28626656  | 28626836  | FLT3 | 693_selected_genes |
| chr13 | 28631458  | 28631624  | FLT3 | 693_selected_genes |
| chr13 | 28635978  | 28636231  | FLT3 | 693_selected_genes |
| chr13 | 28644602  | 28644774  | FLT3 | 693_selected_genes |
| chr13 | 28674579  | 28674672  | FLT3 | 693_selected_genes |
| chr5  | 180030166 | 180030415 | FLT4 | 693_selected_genes |
| chr5  | 180035106 | 180035184 | FLT4 | 693_selected_genes |
| chr5  | 180035255 | 180035309 | FLT4 | 693_selected_genes |
| chr5  | 180035942 | 180036078 | FLT4 | 693_selected_genes |
| chr5  | 180036879 | 180037050 | FLT4 | 693_selected_genes |
| chr5  | 180038305 | 180038504 | FLT4 | 693_selected_genes |
| chr5  | 180039480 | 180039636 | FLT4 | 693_selected_genes |
| chr5  | 180039985 | 180040135 | FLT4 | 693_selected_genes |
| chr5  | 180041042 | 180041204 | FLT4 | 693_selected_genes |
| chr5  | 180043341 | 180043514 | FLT4 | 693_selected_genes |
| chr5  | 180043874 | 180044019 | FLT4 | 693_selected_genes |
| chr5  | 180045744 | 180045945 | FLT4 | 693_selected_genes |
| chr5  | 180045995 | 180046134 | FLT4 | 693_selected_genes |

|       |           |           |       |                    |
|-------|-----------|-----------|-------|--------------------|
| chr5  | 180046227 | 180046391 | FLT4  | 693_selected_genes |
| chr5  | 180046639 | 180046794 | FLT4  | 693_selected_genes |
| chr5  | 180047147 | 180047333 | FLT4  | 693_selected_genes |
| chr5  | 180047583 | 180047740 | FLT4  | 693_selected_genes |
| chr5  | 180047850 | 180048032 | FLT4  | 693_selected_genes |
| chr5  | 180048080 | 180048277 | FLT4  | 693_selected_genes |
| chr5  | 180048516 | 180048929 | FLT4  | 693_selected_genes |
| chr5  | 180049705 | 180049864 | FLT4  | 693_selected_genes |
| chr5  | 180050909 | 180051086 | FLT4  | 693_selected_genes |
| chr5  | 180052843 | 180053056 | FLT4  | 693_selected_genes |
| chr5  | 180053085 | 180053290 | FLT4  | 693_selected_genes |
| chr5  | 180055856 | 180056024 | FLT4  | 693_selected_genes |
| chr5  | 180056233 | 180056452 | FLT4  | 693_selected_genes |
| chr5  | 180056670 | 180056860 | FLT4  | 693_selected_genes |
| chr5  | 180056917 | 180057130 | FLT4  | 693_selected_genes |
| chr5  | 180057199 | 180057362 | FLT4  | 693_selected_genes |
| chr5  | 180057529 | 180057824 | FLT4  | 693_selected_genes |
| chr5  | 180058656 | 180058803 | FLT4  | 693_selected_genes |
| chr5  | 180076462 | 180076570 | FLT4  | 693_selected_genes |
| chr2  | 216226252 | 216226374 | FN1   | 693_selected_genes |
| chr2  | 216226666 | 216226827 | FN1   | 693_selected_genes |
| chr2  | 216229576 | 216229733 | FN1   | 693_selected_genes |
| chr2  | 216230202 | 216230378 | FN1   | 693_selected_genes |
| chr2  | 216232560 | 216232775 | FN1   | 693_selected_genes |
| chr2  | 216234991 | 216235180 | FN1   | 693_selected_genes |
| chr2  | 216236606 | 216237123 | FN1   | 693_selected_genes |
| chr2  | 216238019 | 216238159 | FN1   | 693_selected_genes |
| chr2  | 216239911 | 216240141 | FN1   | 693_selected_genes |
| chr2  | 216240326 | 216240466 | FN1   | 693_selected_genes |
| chr2  | 216241195 | 216241422 | FN1   | 693_selected_genes |
| chr2  | 216242872 | 216243010 | FN1   | 693_selected_genes |
| chr2  | 216243827 | 216244065 | FN1   | 693_selected_genes |
| chr2  | 216245508 | 216245828 | FN1   | 693_selected_genes |
| chr2  | 216246909 | 216247073 | FN1   | 693_selected_genes |
| chr2  | 216248025 | 216248231 | FN1   | 693_selected_genes |
| chr2  | 216248717 | 216248932 | FN1   | 693_selected_genes |
| chr2  | 216249557 | 216249724 | FN1   | 693_selected_genes |
| chr2  | 216251386 | 216251706 | FN1   | 693_selected_genes |
| chr2  | 216252909 | 216253049 | FN1   | 693_selected_genes |
| chr2  | 216256329 | 216256562 | FN1   | 693_selected_genes |
| chr2  | 216257628 | 216257951 | FN1   | 693_selected_genes |
| chr2  | 216259225 | 216259467 | FN1   | 693_selected_genes |
| chr2  | 216261834 | 216261971 | FN1   | 693_selected_genes |
| chr2  | 216262377 | 216262596 | FN1   | 693_selected_genes |
| chr2  | 216263954 | 216264099 | FN1   | 693_selected_genes |
| chr2  | 216269086 | 216269403 | FN1   | 693_selected_genes |
| chr2  | 216270935 | 216271258 | FN1   | 693_selected_genes |
| chr2  | 216271824 | 216272069 | FN1   | 693_selected_genes |
| chr2  | 216272805 | 216272945 | FN1   | 693_selected_genes |
| chr2  | 216272995 | 216273174 | FN1   | 693_selected_genes |
| chr2  | 216274260 | 216274487 | FN1   | 693_selected_genes |
| chr2  | 216274631 | 216274862 | FN1   | 693_selected_genes |
| chr2  | 216279501 | 216279706 | FN1   | 693_selected_genes |
| chr2  | 216283939 | 216284133 | FN1   | 693_selected_genes |
| chr2  | 216285370 | 216285549 | FN1   | 693_selected_genes |
| chr2  | 216286788 | 216286991 | FN1   | 693_selected_genes |
| chr2  | 216288047 | 216288274 | FN1   | 693_selected_genes |
| chr2  | 216288843 | 216289073 | FN1   | 693_selected_genes |
| chr2  | 216289791 | 216290033 | FN1   | 693_selected_genes |
| chr2  | 216292877 | 216293086 | FN1   | 693_selected_genes |
| chr2  | 216295412 | 216295600 | FN1   | 693_selected_genes |
| chr2  | 216296530 | 216296712 | FN1   | 693_selected_genes |
| chr2  | 216298021 | 216298209 | FN1   | 693_selected_genes |
| chr2  | 216299393 | 216299572 | FN1   | 693_selected_genes |
| chr2  | 216300352 | 216300550 | FN1   | 693_selected_genes |
| chr14 | 38060544  | 38061941  | FOXA1 | 693_selected_genes |
| chr14 | 38063317  | 38063406  | FOXA1 | 693_selected_genes |
| chr14 | 38064080  | 38064202  | FOXA1 | 693_selected_genes |
| chr20 | 22562462  | 22563817  | FOXA2 | 693_selected_genes |
| chr20 | 22564804  | 22564941  | FOXA2 | 693_selected_genes |
| chr9  | 100616171 | 100617343 | FOXEL | 693_selected_genes |
| chr3  | 138664408 | 138665589 | FOXL2 | 693_selected_genes |
| chr3  | 71008372  | 71008567  | FOXP1 | 693_selected_genes |
| chr3  | 71015015  | 71015232  | FOXP1 | 693_selected_genes |
| chr3  | 71019861  | 71019981  | FOXP1 | 693_selected_genes |
| chr3  | 71021136  | 71021356  | FOXP1 | 693_selected_genes |
| chr3  | 71021680  | 71021852  | FOXP1 | 693_selected_genes |
| chr3  | 71026066  | 71026218  | FOXP1 | 693_selected_genes |
| chr3  | 71026768  | 71026898  | FOXP1 | 693_selected_genes |
| chr3  | 71026953  | 71027205  | FOXP1 | 693_selected_genes |
| chr3  | 71037119  | 71037253  | FOXP1 | 693_selected_genes |
| chr3  | 71050097  | 71050235  | FOXP1 | 693_selected_genes |
| chr3  | 71064674  | 71064829  | FOXP1 | 693_selected_genes |
| chr3  | 71090453  | 71090708  | FOXP1 | 693_selected_genes |

|       |           |           |        |                    |
|-------|-----------|-----------|--------|--------------------|
| chr3  | 71096062  | 71096271  | FOXP1  | 693_selected_genes |
| chr3  | 71101662  | 71101802  | FOXP1  | 693_selected_genes |
| chr3  | 71102761  | 71102949  | FOXP1  | 693_selected_genes |
| chr3  | 71161661  | 71161813  | FOXP1  | 693_selected_genes |
| chr3  | 71179623  | 71179859  | FOXP1  | 693_selected_genes |
| chr3  | 71247029  | 71247244  | FOXP1  | 693_selected_genes |
| chr3  | 71247327  | 71247557  | FOXP1  | 693_selected_genes |
| chr6  | 1312914   | 1314176   | FOXQ1  | 693_selected_genes |
| chr1  | 78413173  | 78413262  | FUBP1  | 693_selected_genes |
| chr1  | 78414425  | 78414484  | FUBP1  | 693_selected_genes |
| chr1  | 78414532  | 78414624  | FUBP1  | 693_selected_genes |
| chr1  | 78414814  | 78415010  | FUBP1  | 693_selected_genes |
| chr1  | 78420914  | 78421039  | FUBP1  | 693_selected_genes |
| chr1  | 78422231  | 78422410  | FUBP1  | 693_selected_genes |
| chr1  | 78425843  | 78425973  | FUBP1  | 693_selected_genes |
| chr1  | 78426003  | 78426205  | FUBP1  | 693_selected_genes |
| chr1  | 78428429  | 78428640  | FUBP1  | 693_selected_genes |
| chr1  | 78429233  | 78429425  | FUBP1  | 693_selected_genes |
| chr1  | 78429721  | 78429872  | FUBP1  | 693_selected_genes |
| chr1  | 78429913  | 78430066  | FUBP1  | 693_selected_genes |
| chr1  | 78430305  | 78430457  | FUBP1  | 693_selected_genes |
| chr1  | 78430529  | 78430678  | FUBP1  | 693_selected_genes |
| chr1  | 78430727  | 78430940  | FUBP1  | 693_selected_genes |
| chr1  | 78432352  | 78432460  | FUBP1  | 693_selected_genes |
| chr1  | 78432542  | 78432664  | FUBP1  | 693_selected_genes |
| chr1  | 78432707  | 78432810  | FUBP1  | 693_selected_genes |
| chr1  | 78433285  | 78433375  | FUBP1  | 693_selected_genes |
| chr1  | 78433823  | 78433912  | FUBP1  | 693_selected_genes |
| chr1  | 78434680  | 78434793  | FUBP1  | 693_selected_genes |
| chr1  | 78435583  | 78435724  | FUBP1  | 693_selected_genes |
| chr1  | 78444543  | 78444713  | FUBP1  | 693_selected_genes |
| chr5  | 161112970 | 161113058 | GABRA6 | 693_selected_genes |
| chr5  | 161113210 | 161113379 | GABRA6 | 693_selected_genes |
| chr5  | 161113916 | 161114034 | GABRA6 | 693_selected_genes |
| chr5  | 161114460 | 161114592 | GABRA6 | 693_selected_genes |
| chr5  | 161115929 | 161116200 | GABRA6 | 693_selected_genes |
| chr5  | 161116234 | 161116367 | GABRA6 | 693_selected_genes |
| chr5  | 161116541 | 161116810 | GABRA6 | 693_selected_genes |
| chr5  | 161117181 | 161117384 | GABRA6 | 693_selected_genes |
| chr5  | 161118921 | 161119231 | GABRA6 | 693_selected_genes |
| chr5  | 161128478 | 161128804 | GABRA6 | 693_selected_genes |
| chrX  | 48649491  | 48649761  | GATA1  | 693_selected_genes |
| chrX  | 48650225  | 48650653  | GATA1  | 693_selected_genes |
| chrX  | 48650704  | 48650900  | GATA1  | 693_selected_genes |
| chrX  | 48651553  | 48651729  | GATA1  | 693_selected_genes |
| chrX  | 48652174  | 48652700  | GATA1  | 693_selected_genes |
| chr3  | 128199836 | 128200186 | GATA2  | 693_selected_genes |
| chr3  | 128200636 | 128200812 | GATA2  | 693_selected_genes |
| chr3  | 128202677 | 128202873 | GATA2  | 693_selected_genes |
| chr3  | 128204544 | 128205236 | GATA2  | 693_selected_genes |
| chr3  | 128205620 | 128205899 | GATA2  | 693_selected_genes |
| chr10 | 8097593   | 8097884   | GATA3  | 693_selected_genes |
| chr10 | 8100242   | 8100829   | GATA3  | 693_selected_genes |
| chr10 | 8105930   | 8106126   | GATA3  | 693_selected_genes |
| chr10 | 8111410   | 8111586   | GATA3  | 693_selected_genes |
| chr10 | 8115676   | 8116011   | GATA3  | 693_selected_genes |
| chr17 | 17942753  | 17943241  | GID4   | 693_selected_genes |
| chr17 | 17948435  | 17948545  | GID4   | 693_selected_genes |
| chr17 | 17957415  | 17957573  | GID4   | 693_selected_genes |
| chr17 | 17959991  | 17960365  | GID4   | 693_selected_genes |
| chr17 | 17962156  | 17962308  | GID4   | 693_selected_genes |
| chr17 | 17965133  | 17965318  | GID4   | 693_selected_genes |
| chr17 | 17968468  | 17968582  | GID4   | 693_selected_genes |
| chrX  | 100652771 | 100653112 | GLA    | 693_selected_genes |
| chrX  | 100653332 | 100653580 | GLA    | 693_selected_genes |
| chrX  | 100653747 | 100653959 | GLA    | 693_selected_genes |
| chrX  | 100654733 | 100654813 | GLA    | 693_selected_genes |
| chrX  | 100655628 | 100655770 | GLA    | 693_selected_genes |
| chrX  | 100656594 | 100656822 | GLA    | 693_selected_genes |
| chrX  | 100658773 | 100658998 | GLA    | 693_selected_genes |
| chrX  | 100662672 | 100662916 | GLA    | 693_selected_genes |
| chr19 | 3094624   | 3094810   | GNA11  | 693_selected_genes |
| chr19 | 3110121   | 3110356   | GNA11  | 693_selected_genes |
| chr19 | 3113302   | 3113507   | GNA11  | 693_selected_genes |
| chr19 | 3114916   | 3115095   | GNA11  | 693_selected_genes |
| chr19 | 3118896   | 3119076   | GNA11  | 693_selected_genes |
| chr19 | 3119178   | 3119382   | GNA11  | 693_selected_genes |
| chr19 | 3120961   | 3121202   | GNA11  | 693_selected_genes |
| chr19 | 3121317   | 3121457   | GNA11  | 693_selected_genes |
| chr17 | 63010349  | 63010972  | GNA13  | 693_selected_genes |
| chr17 | 63014345  | 63014446  | GNA13  | 693_selected_genes |
| chr17 | 63049594  | 63049871  | GNA13  | 693_selected_genes |
| chr17 | 63052403  | 63052736  | GNA13  | 693_selected_genes |
| chr7  | 79764451  | 79764619  | GNA11  | 693_selected_genes |

|       |           |           |        |                    |
|-------|-----------|-----------|--------|--------------------|
| chr7  | 79818241  | 79818334  | GNAI1  | 693_selected_genes |
| chr7  | 79818380  | 79818572  | GNAI1  | 693_selected_genes |
| chr7  | 79828515  | 79828723  | GNAI1  | 693_selected_genes |
| chr7  | 79832994  | 79833173  | GNAI1  | 693_selected_genes |
| chr7  | 79840259  | 79840439  | GNAI1  | 693_selected_genes |
| chr7  | 79842006  | 79842210  | GNAI1  | 693_selected_genes |
| chr7  | 79846590  | 79846834  | GNAI1  | 693_selected_genes |
| chr9  | 80336213  | 80336454  | GNAQ   | 693_selected_genes |
| chr9  | 80343404  | 80343608  | GNAQ   | 693_selected_genes |
| chr9  | 80409353  | 80409533  | GNAQ   | 693_selected_genes |
| chr9  | 80412410  | 80412589  | GNAQ   | 693_selected_genes |
| chr9  | 80430506  | 80430711  | GNAQ   | 693_selected_genes |
| chr9  | 80537051  | 80537286  | GNAQ   | 693_selected_genes |
| chr9  | 80645405  | 80645504  | GNAQ   | 693_selected_genes |
| chr9  | 80645990  | 80646176  | GNAQ   | 693_selected_genes |
| chr20 | 57415136  | 57415924  | GNAS   | 693_selected_genes |
| chr20 | 57428295  | 57430413  | GNAS   | 693_selected_genes |
| chr20 | 57430583  | 57430728  | GNAS   | 693_selected_genes |
| chr20 | 57466756  | 57466945  | GNAS   | 693_selected_genes |
| chr20 | 57470641  | 57470764  | GNAS   | 693_selected_genes |
| chr20 | 57473970  | 57474065  | GNAS   | 693_selected_genes |
| chr20 | 57474978  | 57475035  | GNAS   | 693_selected_genes |
| chr20 | 57478557  | 57478665  | GNAS   | 693_selected_genes |
| chr20 | 57478701  | 57478871  | GNAS   | 693_selected_genes |
| chr20 | 57480412  | 57480560  | GNAS   | 693_selected_genes |
| chr20 | 57484191  | 57484296  | GNAS   | 693_selected_genes |
| chr20 | 57484379  | 57484503  | GNAS   | 693_selected_genes |
| chr20 | 57484550  | 57484659  | GNAS   | 693_selected_genes |
| chr20 | 57484713  | 57484884  | GNAS   | 693_selected_genes |
| chr20 | 57484980  | 57485161  | GNAS   | 693_selected_genes |
| chr20 | 57485363  | 57485481  | GNAS   | 693_selected_genes |
| chr20 | 57485712  | 57485909  | GNAS   | 693_selected_genes |
| chr14 | 93263757  | 93264351  | GOLGA5 | 693_selected_genes |
| chr14 | 93273055  | 93273333  | GOLGA5 | 693_selected_genes |
| chr14 | 93275619  | 93275889  | GOLGA5 | 693_selected_genes |
| chr14 | 93276573  | 93276747  | GOLGA5 | 693_selected_genes |
| chr14 | 93277870  | 93278124  | GOLGA5 | 693_selected_genes |
| chr14 | 93282570  | 93282791  | GOLGA5 | 693_selected_genes |
| chr14 | 93286027  | 93286206  | GOLGA5 | 693_selected_genes |
| chr14 | 93290865  | 93291014  | GOLGA5 | 693_selected_genes |
| chr14 | 93299441  | 93299717  | GOLGA5 | 693_selected_genes |
| chr14 | 93301878  | 93302034  | GOLGA5 | 693_selected_genes |
| chr14 | 93303705  | 93303819  | GOLGA5 | 693_selected_genes |
| chr14 | 93305685  | 93305816  | GOLGA5 | 693_selected_genes |
| chr10 | 101157278 | 101157468 | GOT1   | 693_selected_genes |
| chr10 | 101162311 | 101162504 | GOT1   | 693_selected_genes |
| chr10 | 101163200 | 101163416 | GOT1   | 693_selected_genes |
| chr10 | 101163455 | 101163656 | GOT1   | 693_selected_genes |
| chr10 | 101165487 | 101165642 | GOT1   | 693_selected_genes |
| chr10 | 101165868 | 101166031 | GOT1   | 693_selected_genes |
| chr10 | 101166457 | 101166631 | GOT1   | 693_selected_genes |
| chr10 | 101180355 | 101180587 | GOT1   | 693_selected_genes |
| chr10 | 101189953 | 101190058 | GOT1   | 693_selected_genes |
| chr10 | 101190179 | 101190347 | GOT1   | 693_selected_genes |
| chr17 | 7214872   | 7214934   | GPS2   | 693_selected_genes |
| chr17 | 7216049   | 7216183   | GPS2   | 693_selected_genes |
| chr17 | 7216256   | 7216468   | GPS2   | 693_selected_genes |
| chr17 | 7216505   | 7216635   | GPS2   | 693_selected_genes |
| chr17 | 7216673   | 7216813   | GPS2   | 693_selected_genes |
| chr17 | 7216861   | 7217065   | GPS2   | 693_selected_genes |
| chr17 | 7217199   | 7217332   | GPS2   | 693_selected_genes |
| chr17 | 7217373   | 7217503   | GPS2   | 693_selected_genes |
| chr17 | 7217584   | 7217747   | GPS2   | 693_selected_genes |
| chr17 | 7217781   | 7217941   | GPS2   | 693_selected_genes |
| chr17 | 7218252   | 7218467   | GPS2   | 693_selected_genes |
| chr3  | 49394795  | 49395205  | GPX1   | 693_selected_genes |
| chr3  | 49395389  | 49395736  | GPX1   | 693_selected_genes |
| chr15 | 33022866  | 33023471  | GREM1  | 693_selected_genes |
| chr16 | 9856980   | 9858830   | GRIN2A | 693_selected_genes |
| chr16 | 9862682   | 9862971   | GRIN2A | 693_selected_genes |
| chr16 | 9892108   | 9892346   | GRIN2A | 693_selected_genes |
| chr16 | 9916095   | 9916306   | GRIN2A | 693_selected_genes |
| chr16 | 9923254   | 9923534   | GRIN2A | 693_selected_genes |
| chr16 | 9927936   | 9928112   | GRIN2A | 693_selected_genes |
| chr16 | 9934478   | 9934682   | GRIN2A | 693_selected_genes |
| chr16 | 9934767   | 9934986   | GRIN2A | 693_selected_genes |
| chr16 | 9943587   | 9943843   | GRIN2A | 693_selected_genes |
| chr16 | 9984817   | 9984982   | GRIN2A | 693_selected_genes |
| chr16 | 10031790  | 10032433  | GRIN2A | 693_selected_genes |
| chr16 | 10273829  | 10274293  | GRIN2A | 693_selected_genes |
| chr7  | 86274063  | 86274213  | GRM3   | 693_selected_genes |
| chr7  | 86394436  | 86394954  | GRM3   | 693_selected_genes |
| chr7  | 86415551  | 86416457  | GRM3   | 693_selected_genes |
| chr7  | 86468129  | 86469246  | GRM3   | 693_selected_genes |

|       |           |           |         |                    |
|-------|-----------|-----------|---------|--------------------|
| chr7  | 86479660  | 86479885  | GRM3    | 693_selected_genes |
| chr7  | 86493572  | 86493737  | GRM3    | 693_selected_genes |
| chr3  | 119545609 | 119545727 | GSK3B   | 693_selected_genes |
| chr3  | 119562076 | 119562225 | GSK3B   | 693_selected_genes |
| chr3  | 119582240 | 119582477 | GSK3B   | 693_selected_genes |
| chr3  | 119585411 | 119585500 | GSK3B   | 693_selected_genes |
| chr3  | 119595234 | 119595380 | GSK3B   | 693_selected_genes |
| chr3  | 119624576 | 119624724 | GSK3B   | 693_selected_genes |
| chr3  | 119631525 | 119631682 | GSK3B   | 693_selected_genes |
| chr3  | 119634865 | 119635046 | GSK3B   | 693_selected_genes |
| chr3  | 119642194 | 119642355 | GSK3B   | 693_selected_genes |
| chr3  | 119666089 | 119666223 | GSK3B   | 693_selected_genes |
| chr3  | 119720867 | 119721111 | GSK3B   | 693_selected_genes |
| chr3  | 119812168 | 119812306 | GSK3B   | 693_selected_genes |
| chr11 | 67351289  | 67351340  | GSTP1   | 693_selected_genes |
| chr11 | 67351579  | 67351665  | GSTP1   | 693_selected_genes |
| chr11 | 67351909  | 67352066  | GSTP1   | 693_selected_genes |
| chr11 | 67352130  | 67352268  | GSTP1   | 693_selected_genes |
| chr11 | 67352583  | 67352737  | GSTP1   | 693_selected_genes |
| chr11 | 67353549  | 67353707  | GSTP1   | 693_selected_genes |
| chr11 | 67353834  | 67354073  | GSTP1   | 693_selected_genes |
| chr11 | 106558249 | 106558507 | GUCY1A2 | 693_selected_genes |
| chr11 | 106579212 | 106579417 | GUCY1A2 | 693_selected_genes |
| chr11 | 106617251 | 106617394 | GUCY1A2 | 693_selected_genes |
| chr11 | 106647139 | 106647333 | GUCY1A2 | 693_selected_genes |
| chr11 | 106680693 | 106681229 | GUCY1A2 | 693_selected_genes |
| chr11 | 106807350 | 106807463 | GUCY1A2 | 693_selected_genes |
| chr11 | 106810160 | 106810929 | GUCY1A2 | 693_selected_genes |
| chr11 | 106849319 | 106849491 | GUCY1A2 | 693_selected_genes |
| chr11 | 106856770 | 106856882 | GUCY1A2 | 693_selected_genes |
| chr11 | 106888453 | 106888806 | GUCY1A2 | 693_selected_genes |
| chr7  | 65425858  | 65426075  | GUSB    | 693_selected_genes |
| chr7  | 65429284  | 65429470  | GUSB    | 693_selected_genes |
| chr7  | 65432692  | 65432919  | GUSB    | 693_selected_genes |
| chr7  | 65435243  | 65435378  | GUSB    | 693_selected_genes |
| chr7  | 65439256  | 65439453  | GUSB    | 693_selected_genes |
| chr7  | 65439487  | 65439716  | GUSB    | 693_selected_genes |
| chr7  | 65439880  | 65440083  | GUSB    | 693_selected_genes |
| chr7  | 65440976  | 65441214  | GUSB    | 693_selected_genes |
| chr7  | 65444360  | 65444553  | GUSB    | 693_selected_genes |
| chr7  | 65444688  | 65444923  | GUSB    | 693_selected_genes |
| chr7  | 65445185  | 65445421  | GUSB    | 693_selected_genes |
| chr7  | 65446935  | 65447195  | GUSB    | 693_selected_genes |
| chr1  | 226252027 | 226252205 | H3F3A   | 693_selected_genes |
| chr1  | 226253331 | 226253625 | H3F3A   | 693_selected_genes |
| chr1  | 226259026 | 226259205 | H3F3A   | 693_selected_genes |
| chr12 | 31944667  | 31945125  | H3F3C   | 693_selected_genes |
| chrX  | 153214772 | 153214862 | HCFC1   | 693_selected_genes |
| chrX  | 153214978 | 153215092 | HCFC1   | 693_selected_genes |
| chrX  | 153215668 | 153216019 | HCFC1   | 693_selected_genes |
| chrX  | 153216238 | 153216474 | HCFC1   | 693_selected_genes |
| chrX  | 153216775 | 153216963 | HCFC1   | 693_selected_genes |
| chrX  | 153217014 | 153217183 | HCFC1   | 693_selected_genes |
| chrX  | 153217266 | 153217637 | HCFC1   | 693_selected_genes |
| chrX  | 153217939 | 153218566 | HCFC1   | 693_selected_genes |
| chrX  | 153219032 | 153219246 | HCFC1   | 693_selected_genes |
| chrX  | 153219491 | 153221018 | HCFC1   | 693_selected_genes |
| chrX  | 153221616 | 153221887 | HCFC1   | 693_selected_genes |
| chrX  | 153222050 | 153222239 | HCFC1   | 693_selected_genes |
| chrX  | 153222343 | 153222536 | HCFC1   | 693_selected_genes |
| chrX  | 153222739 | 153223009 | HCFC1   | 693_selected_genes |
| chrX  | 153223207 | 153223362 | HCFC1   | 693_selected_genes |
| chrX  | 153223450 | 153223725 | HCFC1   | 693_selected_genes |
| chrX  | 153223994 | 153224242 | HCFC1   | 693_selected_genes |
| chrX  | 153224756 | 153224967 | HCFC1   | 693_selected_genes |
| chrX  | 153225227 | 153225637 | HCFC1   | 693_selected_genes |
| chrX  | 153225660 | 153225890 | HCFC1   | 693_selected_genes |
| chrX  | 153226967 | 153227124 | HCFC1   | 693_selected_genes |
| chrX  | 153227647 | 153227782 | HCFC1   | 693_selected_genes |
| chrX  | 153228650 | 153228909 | HCFC1   | 693_selected_genes |
| chrX  | 153229549 | 153229760 | HCFC1   | 693_selected_genes |
| chrX  | 153230003 | 153230202 | HCFC1   | 693_selected_genes |
| chrX  | 153236073 | 153236316 | HCFC1   | 693_selected_genes |
| chr15 | 63901254  | 63901490  | HERC1   | 693_selected_genes |
| chr15 | 63904424  | 63904780  | HERC1   | 693_selected_genes |
| chr15 | 63907941  | 63908144  | HERC1   | 693_selected_genes |
| chr15 | 63908603  | 63908906  | HERC1   | 693_selected_genes |
| chr15 | 63914988  | 63915115  | HERC1   | 693_selected_genes |
| chr15 | 63915898  | 63916114  | HERC1   | 693_selected_genes |
| chr15 | 63916331  | 63916551  | HERC1   | 693_selected_genes |
| chr15 | 63918115  | 63918378  | HERC1   | 693_selected_genes |
| chr15 | 63920850  | 63921039  | HERC1   | 693_selected_genes |
| chr15 | 63922639  | 63922859  | HERC1   | 693_selected_genes |
| chr15 | 63924768  | 63924829  | HERC1   | 693_selected_genes |

|       |          |          |       |                    |
|-------|----------|----------|-------|--------------------|
| chr15 | 63924882 | 63925035 | HERC1 | 693_selected_genes |
| chr15 | 63926021 | 63926194 | HERC1 | 693_selected_genes |
| chr15 | 63926906 | 63927112 | HERC1 | 693_selected_genes |
| chr15 | 63928134 | 63928366 | HERC1 | 693_selected_genes |
| chr15 | 63929273 | 63929358 | HERC1 | 693_selected_genes |
| chr15 | 63929678 | 63929867 | HERC1 | 693_selected_genes |
| chr15 | 63930584 | 63930760 | HERC1 | 693_selected_genes |
| chr15 | 63930884 | 63931000 | HERC1 | 693_selected_genes |
| chr15 | 63932325 | 63932669 | HERC1 | 693_selected_genes |
| chr15 | 63933643 | 63933867 | HERC1 | 693_selected_genes |
| chr15 | 63935130 | 63935282 | HERC1 | 693_selected_genes |
| chr15 | 63935577 | 63935774 | HERC1 | 693_selected_genes |
| chr15 | 63937165 | 63937321 | HERC1 | 693_selected_genes |
| chr15 | 63937656 | 63937906 | HERC1 | 693_selected_genes |
| chr15 | 63940242 | 63940423 | HERC1 | 693_selected_genes |
| chr15 | 63941898 | 63942149 | HERC1 | 693_selected_genes |
| chr15 | 63943426 | 63943604 | HERC1 | 693_selected_genes |
| chr15 | 63944587 | 63944765 | HERC1 | 693_selected_genes |
| chr15 | 63946292 | 63946548 | HERC1 | 693_selected_genes |
| chr15 | 63947915 | 63948179 | HERC1 | 693_selected_genes |
| chr15 | 63948261 | 63948582 | HERC1 | 693_selected_genes |
| chr15 | 63950717 | 63950942 | HERC1 | 693_selected_genes |
| chr15 | 63951909 | 63952160 | HERC1 | 693_selected_genes |
| chr15 | 63953146 | 63953249 | HERC1 | 693_selected_genes |
| chr15 | 63953926 | 63954245 | HERC1 | 693_selected_genes |
| chr15 | 63955157 | 63955428 | HERC1 | 693_selected_genes |
| chr15 | 63956643 | 63956818 | HERC1 | 693_selected_genes |
| chr15 | 63958092 | 63958374 | HERC1 | 693_selected_genes |
| chr15 | 63958529 | 63958696 | HERC1 | 693_selected_genes |
| chr15 | 63961711 | 63961922 | HERC1 | 693_selected_genes |
| chr15 | 63964669 | 63964918 | HERC1 | 693_selected_genes |
| chr15 | 63966515 | 63967341 | HERC1 | 693_selected_genes |
| chr15 | 63970018 | 63970589 | HERC1 | 693_selected_genes |
| chr15 | 63972250 | 63972384 | HERC1 | 693_selected_genes |
| chr15 | 63972710 | 63973000 | HERC1 | 693_selected_genes |
| chr15 | 63978532 | 63978759 | HERC1 | 693_selected_genes |
| chr15 | 63981762 | 63981923 | HERC1 | 693_selected_genes |
| chr15 | 63982714 | 63982871 | HERC1 | 693_selected_genes |
| chr15 | 63984584 | 63984790 | HERC1 | 693_selected_genes |
| chr15 | 63986137 | 63986381 | HERC1 | 693_selected_genes |
| chr15 | 63986485 | 63986773 | HERC1 | 693_selected_genes |
| chr15 | 63986947 | 63987118 | HERC1 | 693_selected_genes |
| chr15 | 63988297 | 63988563 | HERC1 | 693_selected_genes |
| chr15 | 63990901 | 63991220 | HERC1 | 693_selected_genes |
| chr15 | 63998953 | 63999055 | HERC1 | 693_selected_genes |
| chr15 | 64004948 | 64005119 | HERC1 | 693_selected_genes |
| chr15 | 64005526 | 64005889 | HERC1 | 693_selected_genes |
| chr15 | 64008475 | 64008697 | HERC1 | 693_selected_genes |
| chr15 | 64010747 | 64010918 | HERC1 | 693_selected_genes |
| chr15 | 64010956 | 64011121 | HERC1 | 693_selected_genes |
| chr15 | 64015355 | 64015579 | HERC1 | 693_selected_genes |
| chr15 | 64017465 | 64017737 | HERC1 | 693_selected_genes |
| chr15 | 64019820 | 64020062 | HERC1 | 693_selected_genes |
| chr15 | 64021409 | 64021592 | HERC1 | 693_selected_genes |
| chr15 | 64021670 | 64021873 | HERC1 | 693_selected_genes |
| chr15 | 64025097 | 64025369 | HERC1 | 693_selected_genes |
| chr15 | 64026897 | 64027073 | HERC1 | 693_selected_genes |
| chr15 | 64039091 | 64039307 | HERC1 | 693_selected_genes |
| chr15 | 64039897 | 64040082 | HERC1 | 693_selected_genes |
| chr15 | 64041540 | 64041762 | HERC1 | 693_selected_genes |
| chr15 | 64041820 | 64042015 | HERC1 | 693_selected_genes |
| chr15 | 64045131 | 64045309 | HERC1 | 693_selected_genes |
| chr15 | 64046678 | 64046872 | HERC1 | 693_selected_genes |
| chr15 | 64047402 | 64047549 | HERC1 | 693_selected_genes |
| chr15 | 64048610 | 64048972 | HERC1 | 693_selected_genes |
| chr15 | 64050348 | 64050593 | HERC1 | 693_selected_genes |
| chr15 | 64056269 | 64056415 | HERC1 | 693_selected_genes |
| chr15 | 64066867 | 64067847 | HERC1 | 693_selected_genes |
| chr7  | 81331871 | 81332098 | HGF   | 693_selected_genes |
| chr7  | 81334680 | 81334876 | HGF   | 693_selected_genes |
| chr7  | 81334937 | 81335094 | HGF   | 693_selected_genes |
| chr7  | 81335577 | 81335768 | HGF   | 693_selected_genes |
| chr7  | 81336580 | 81336705 | HGF   | 693_selected_genes |
| chr7  | 81339437 | 81339584 | HGF   | 693_selected_genes |
| chr7  | 81340771 | 81340860 | HGF   | 693_selected_genes |
| chr7  | 81346522 | 81346706 | HGF   | 693_selected_genes |
| chr7  | 81350035 | 81350188 | HGF   | 693_selected_genes |
| chr7  | 81355180 | 81355358 | HGF   | 693_selected_genes |
| chr7  | 81358895 | 81359120 | HGF   | 693_selected_genes |
| chr7  | 81372232 | 81372290 | HGF   | 693_selected_genes |
| chr7  | 81372643 | 81372812 | HGF   | 693_selected_genes |
| chr7  | 81374290 | 81374461 | HGF   | 693_selected_genes |
| chr7  | 81381402 | 81381603 | HGF   | 693_selected_genes |
| chr7  | 81385281 | 81385404 | HGF   | 693_selected_genes |

|       |           |           |           |                    |
|-------|-----------|-----------|-----------|--------------------|
| chr7  | 81386475  | 81386644  | HGF       | 693_selected_genes |
| chr7  | 81387982  | 81388145  | HGF       | 693_selected_genes |
| chr7  | 81391997  | 81392213  | HGF       | 693_selected_genes |
| chr7  | 81399174  | 81399312  | HGF       | 693_selected_genes |
| chr14 | 62162497  | 62162582  | HIF1A     | 693_selected_genes |
| chr14 | 62164543  | 62164697  | HIF1A     | 693_selected_genes |
| chr14 | 62187071  | 62187315  | HIF1A     | 693_selected_genes |
| chr14 | 62188201  | 62188397  | HIF1A     | 693_selected_genes |
| chr14 | 62188431  | 62188566  | HIF1A     | 693_selected_genes |
| chr14 | 62193398  | 62193561  | HIF1A     | 693_selected_genes |
| chr14 | 62194145  | 62194398  | HIF1A     | 693_selected_genes |
| chr14 | 62199110  | 62199267  | HIF1A     | 693_selected_genes |
| chr14 | 62200830  | 62201028  | HIF1A     | 693_selected_genes |
| chr14 | 62203581  | 62203852  | HIF1A     | 693_selected_genes |
| chr14 | 62204779  | 62205116  | HIF1A     | 693_selected_genes |
| chr14 | 62207197  | 62207370  | HIF1A     | 693_selected_genes |
| chr14 | 62207447  | 62207931  | HIF1A     | 693_selected_genes |
| chr14 | 62211397  | 62211556  | HIF1A     | 693_selected_genes |
| chr14 | 62212383  | 62212560  | HIF1A     | 693_selected_genes |
| chr14 | 62213626  | 62213828  | HIF1A     | 693_selected_genes |
| chr6  | 26055989  | 26056681  | HIST1H1C  | 693_selected_genes |
| chr6  | 26158372  | 26158803  | HIST1H2BD | 693_selected_genes |
| chr6  | 26031852  | 26032313  | HIST1H3B  | 693_selected_genes |
| chr6  | 29910305  | 29910428  | HLA-A     | 693_selected_genes |
| chr6  | 29910508  | 29910828  | HLA-A     | 693_selected_genes |
| chr6  | 29911019  | 29911345  | HLA-A     | 693_selected_genes |
| chr6  | 29911873  | 29912199  | HLA-A     | 693_selected_genes |
| chr6  | 29912251  | 29912436  | HLA-A     | 693_selected_genes |
| chr6  | 29912810  | 29912893  | HLA-A     | 693_selected_genes |
| chr6  | 29912985  | 29913083  | HLA-A     | 693_selected_genes |
| chr6  | 29913202  | 29913257  | HLA-A     | 693_selected_genes |
| chr6  | 31322234  | 31322328  | HLA-B     | 693_selected_genes |
| chr6  | 31322384  | 31322467  | HLA-B     | 693_selected_genes |
| chr6  | 31322858  | 31323025  | HLA-B     | 693_selected_genes |
| chr6  | 31323068  | 31323394  | HLA-B     | 693_selected_genes |
| chr6  | 31323502  | 31323608  | HLA-B     | 693_selected_genes |
| chr6  | 31323918  | 31324244  | HLA-B     | 693_selected_genes |
| chr6  | 31324439  | 31324962  | HLA-B     | 693_selected_genes |
| chr12 | 121416403 | 121416922 | HNF1A     | 693_selected_genes |
| chr12 | 121426610 | 121426860 | HNF1A     | 693_selected_genes |
| chr12 | 121431297 | 121431534 | HNF1A     | 693_selected_genes |
| chr12 | 121431941 | 121432233 | HNF1A     | 693_selected_genes |
| chr12 | 121434039 | 121434241 | HNF1A     | 693_selected_genes |
| chr12 | 121434318 | 121434824 | HNF1A     | 693_selected_genes |
| chr12 | 121435251 | 121435621 | HNF1A     | 693_selected_genes |
| chr12 | 121437045 | 121437455 | HNF1A     | 693_selected_genes |
| chr12 | 121438842 | 121439020 | HNF1A     | 693_selected_genes |
| chr11 | 532610    | 532780    | HRAS      | 693_selected_genes |
| chr11 | 533251    | 533383    | HRAS      | 693_selected_genes |
| chr11 | 533427    | 533637    | HRAS      | 693_selected_genes |
| chr11 | 533740    | 533969    | HRAS      | 693_selected_genes |
| chr11 | 534186    | 534347    | HRAS      | 693_selected_genes |
| chr1  | 120050068 | 120050269 | HSD3B1    | 693_selected_genes |
| chr1  | 120054100 | 120054315 | HSD3B1    | 693_selected_genes |
| chr1  | 120056431 | 120057293 | HSD3B1    | 693_selected_genes |
| chr6  | 44216341  | 44216538  | HSP90AB1  | 693_selected_genes |
| chr6  | 44217088  | 44217345  | HSP90AB1  | 693_selected_genes |
| chr6  | 44217386  | 44217596  | HSP90AB1  | 693_selected_genes |
| chr6  | 44217732  | 44217916  | HSP90AB1  | 693_selected_genes |
| chr6  | 44218002  | 44218361  | HSP90AB1  | 693_selected_genes |
| chr6  | 44218759  | 44218975  | HSP90AB1  | 693_selected_genes |
| chr6  | 44219129  | 44219370  | HSP90AB1  | 693_selected_genes |
| chr6  | 44219448  | 44219646  | HSP90AB1  | 693_selected_genes |
| chr6  | 44219710  | 44220029  | HSP90AB1  | 693_selected_genes |
| chr6  | 44220756  | 44221140  | HSP90AB1  | 693_selected_genes |
| chr6  | 44221200  | 44221360  | HSP90AB1  | 693_selected_genes |
| chr6  | 44221381  | 44221624  | HSP90AB1  | 693_selected_genes |
| chr11 | 122928416 | 122928652 | HSPA8     | 693_selected_genes |
| chr11 | 122928934 | 122929217 | HSPA8     | 693_selected_genes |
| chr11 | 122929314 | 122929563 | HSPA8     | 693_selected_genes |
| chr11 | 122929741 | 122929994 | HSPA8     | 693_selected_genes |
| chr11 | 122930155 | 122930761 | HSPA8     | 693_selected_genes |
| chr11 | 122930798 | 122931001 | HSPA8     | 693_selected_genes |
| chr11 | 122931275 | 122931531 | HSPA8     | 693_selected_genes |
| chr11 | 122931802 | 122932057 | HSPA8     | 693_selected_genes |
| chr21 | 45642904  | 45642986  | ICOSLG    | 693_selected_genes |
| chr21 | 45648891  | 45648952  | ICOSLG    | 693_selected_genes |
| chr21 | 45649387  | 45649997  | ICOSLG    | 693_selected_genes |
| chr21 | 45651137  | 45651352  | ICOSLG    | 693_selected_genes |
| chr21 | 45655129  | 45655470  | ICOSLG    | 693_selected_genes |
| chr21 | 45656724  | 45657125  | ICOSLG    | 693_selected_genes |
| chr21 | 45658305  | 45658396  | ICOSLG    | 693_selected_genes |
| chr21 | 45660661  | 45660725  | ICOSLG    | 693_selected_genes |
| chr2  | 209101777 | 209101918 | IDH1      | 693_selected_genes |

|       |           |           |        |                    |
|-------|-----------|-----------|--------|--------------------|
| chr2  | 209103769 | 209103982 | IDH1   | 693_selected_genes |
| chr2  | 209104561 | 209104752 | IDH1   | 693_selected_genes |
| chr2  | 209106692 | 209106894 | IDH1   | 693_selected_genes |
| chr2  | 209108125 | 209108353 | IDH1   | 693_selected_genes |
| chr2  | 209110017 | 209110173 | IDH1   | 693_selected_genes |
| chr2  | 209113064 | 209113409 | IDH1   | 693_selected_genes |
| chr2  | 209116128 | 209116300 | IDH1   | 693_selected_genes |
| chr15 | 90627472  | 90627610  | IDH2   | 693_selected_genes |
| chr15 | 90628022  | 90628165  | IDH2   | 693_selected_genes |
| chr15 | 90628207  | 90628355  | IDH2   | 693_selected_genes |
| chr15 | 90628481  | 90628644  | IDH2   | 693_selected_genes |
| chr15 | 90630318  | 90630520  | IDH2   | 693_selected_genes |
| chr15 | 90630645  | 90630832  | IDH2   | 693_selected_genes |
| chr15 | 90631565  | 90631759  | IDH2   | 693_selected_genes |
| chr15 | 90631793  | 90632004  | IDH2   | 693_selected_genes |
| chr15 | 90633685  | 90633901  | IDH2   | 693_selected_genes |
| chr15 | 90634759  | 90634901  | IDH2   | 693_selected_genes |
| chr15 | 90645482  | 90645647  | IDH2   | 693_selected_genes |
| chr6  | 137519142 | 137519801 | IFNGR1 | 693_selected_genes |
| chr6  | 137521992 | 137522170 | IFNGR1 | 693_selected_genes |
| chr6  | 137524610 | 137524892 | IFNGR1 | 693_selected_genes |
| chr6  | 137525443 | 137525666 | IFNGR1 | 693_selected_genes |
| chr6  | 137527247 | 137527470 | IFNGR1 | 693_selected_genes |
| chr6  | 137528074 | 137528239 | IFNGR1 | 693_selected_genes |
| chr6  | 137536378 | 137536483 | IFNGR1 | 693_selected_genes |
| chr6  | 137539562 | 137539613 | IFNGR1 | 693_selected_genes |
| chr6  | 137540354 | 137540489 | IFNGR1 | 693_selected_genes |
| chr12 | 102796259 | 102796369 | IGF1   | 693_selected_genes |
| chr12 | 102811570 | 102811806 | IGF1   | 693_selected_genes |
| chr12 | 102813261 | 102813493 | IGF1   | 693_selected_genes |
| chr12 | 102869395 | 102869602 | IGF1   | 693_selected_genes |
| chr12 | 102872239 | 102872304 | IGF1   | 693_selected_genes |
| chr12 | 102874071 | 102874184 | IGF1   | 693_selected_genes |
| chr15 | 99192785  | 99192929  | IGF1R  | 693_selected_genes |
| chr15 | 99250765  | 99251361  | IGF1R  | 693_selected_genes |
| chr15 | 99434528  | 99434891  | IGF1R  | 693_selected_genes |
| chr15 | 99439960  | 99440159  | IGF1R  | 693_selected_genes |
| chr15 | 99442680  | 99442875  | IGF1R  | 693_selected_genes |
| chr15 | 99451888  | 99452153  | IGF1R  | 693_selected_genes |
| chr15 | 99454518  | 99454695  | IGF1R  | 693_selected_genes |
| chr15 | 99456247  | 99456536  | IGF1R  | 693_selected_genes |
| chr15 | 99459167  | 99459385  | IGF1R  | 693_selected_genes |
| chr15 | 99459875  | 99460130  | IGF1R  | 693_selected_genes |
| chr15 | 99465351  | 99465685  | IGF1R  | 693_selected_genes |
| chr15 | 99467079  | 99467266  | IGF1R  | 693_selected_genes |
| chr15 | 99467728  | 99467938  | IGF1R  | 693_selected_genes |
| chr15 | 99472761  | 99472914  | IGF1R  | 693_selected_genes |
| chr15 | 99473438  | 99473559  | IGF1R  | 693_selected_genes |
| chr15 | 99478027  | 99478307  | IGF1R  | 693_selected_genes |
| chr15 | 99478519  | 99478680  | IGF1R  | 693_selected_genes |
| chr15 | 99482404  | 99482614  | IGF1R  | 693_selected_genes |
| chr15 | 99486126  | 99486306  | IGF1R  | 693_selected_genes |
| chr15 | 99491777  | 99491962  | IGF1R  | 693_selected_genes |
| chr15 | 99500264  | 99500696  | IGF1R  | 693_selected_genes |
| chr11 | 2154191   | 2154478   | IGF2   | 693_selected_genes |
| chr11 | 2154721   | 2154929   | IGF2   | 693_selected_genes |
| chr11 | 2156571   | 2156784   | IGF2   | 693_selected_genes |
| chr11 | 2161339   | 2161551   | IGF2   | 693_selected_genes |
| chr6  | 160390253 | 160390452 | IGF2R  | 693_selected_genes |
| chr6  | 160412190 | 160412380 | IGF2R  | 693_selected_genes |
| chr6  | 160430016 | 160430191 | IGF2R  | 693_selected_genes |
| chr6  | 160431693 | 160431842 | IGF2R  | 693_selected_genes |
| chr6  | 160445578 | 160445761 | IGF2R  | 693_selected_genes |
| chr6  | 160448191 | 160448371 | IGF2R  | 693_selected_genes |
| chr6  | 160450556 | 160450712 | IGF2R  | 693_selected_genes |
| chr6  | 160453557 | 160453770 | IGF2R  | 693_selected_genes |
| chr6  | 160453948 | 160454164 | IGF2R  | 693_selected_genes |
| chr6  | 160455425 | 160455579 | IGF2R  | 693_selected_genes |
| chr6  | 160461566 | 160461781 | IGF2R  | 693_selected_genes |
| chr6  | 160464154 | 160464345 | IGF2R  | 693_selected_genes |
| chr6  | 160465520 | 160465714 | IGF2R  | 693_selected_genes |
| chr6  | 160466751 | 160466939 | IGF2R  | 693_selected_genes |
| chr6  | 160467504 | 160467702 | IGF2R  | 693_selected_genes |
| chr6  | 160468165 | 160468393 | IGF2R  | 693_selected_genes |
| chr6  | 160468798 | 160468964 | IGF2R  | 693_selected_genes |
| chr6  | 160469381 | 160469600 | IGF2R  | 693_selected_genes |
| chr6  | 160471479 | 160471709 | IGF2R  | 693_selected_genes |
| chr6  | 160477430 | 160477582 | IGF2R  | 693_selected_genes |
| chr6  | 160479029 | 160479181 | IGF2R  | 693_selected_genes |
| chr6  | 160479912 | 160480155 | IGF2R  | 693_selected_genes |
| chr6  | 160481553 | 160481774 | IGF2R  | 693_selected_genes |
| chr6  | 160482509 | 160482703 | IGF2R  | 693_selected_genes |
| chr6  | 160482759 | 160482985 | IGF2R  | 693_selected_genes |
| chr6  | 160483538 | 160483676 | IGF2R  | 693_selected_genes |

|       |           |           |        |                    |
|-------|-----------|-----------|--------|--------------------|
| chr6  | 160484421 | 160484687 | IGF2R  | 693_selected_genes |
| chr6  | 160485407 | 160485588 | IGF2R  | 693_selected_genes |
| chr6  | 160485810 | 160485958 | IGF2R  | 693_selected_genes |
| chr6  | 160489255 | 160489442 | IGF2R  | 693_selected_genes |
| chr6  | 160490874 | 160491115 | IGF2R  | 693_selected_genes |
| chr6  | 160492916 | 160493093 | IGF2R  | 693_selected_genes |
| chr6  | 160493771 | 160493941 | IGF2R  | 693_selected_genes |
| chr6  | 160494219 | 160494526 | IGF2R  | 693_selected_genes |
| chr6  | 160494763 | 160495032 | IGF2R  | 693_selected_genes |
| chr6  | 160496853 | 160497053 | IGF2R  | 693_selected_genes |
| chr6  | 160499207 | 160499419 | IGF2R  | 693_selected_genes |
| chr6  | 160500586 | 160500844 | IGF2R  | 693_selected_genes |
| chr6  | 160501135 | 160501332 | IGF2R  | 693_selected_genes |
| chr6  | 160504956 | 160505241 | IGF2R  | 693_selected_genes |
| chr6  | 160506001 | 160506188 | IGF2R  | 693_selected_genes |
| chr6  | 160509039 | 160509204 | IGF2R  | 693_selected_genes |
| chr6  | 160510113 | 160510310 | IGF2R  | 693_selected_genes |
| chr6  | 160510922 | 160511195 | IGF2R  | 693_selected_genes |
| chr6  | 160517445 | 160517682 | IGF2R  | 693_selected_genes |
| chr6  | 160523525 | 160523728 | IGF2R  | 693_selected_genes |
| chr6  | 160524752 | 160524872 | IGF2R  | 693_selected_genes |
| chr6  | 160525680 | 160526141 | IGF2R  | 693_selected_genes |
| chr1  | 206646545 | 206646682 | IKBKE  | 693_selected_genes |
| chr1  | 206647648 | 206647839 | IKBKE  | 693_selected_genes |
| chr1  | 206648182 | 206648362 | IKBKE  | 693_selected_genes |
| chr1  | 206649498 | 206649730 | IKBKE  | 693_selected_genes |
| chr1  | 206649995 | 206650206 | IKBKE  | 693_selected_genes |
| chr1  | 206651066 | 206651227 | IKBKE  | 693_selected_genes |
| chr1  | 206651477 | 206651707 | IKBKE  | 693_selected_genes |
| chr1  | 206652260 | 206652501 | IKBKE  | 693_selected_genes |
| chr1  | 206653187 | 206653302 | IKBKE  | 693_selected_genes |
| chr1  | 206653339 | 206653481 | IKBKE  | 693_selected_genes |
| chr1  | 206653764 | 206653901 | IKBKE  | 693_selected_genes |
| chr1  | 206658308 | 206658434 | IKBKE  | 693_selected_genes |
| chr1  | 206658505 | 206658668 | IKBKE  | 693_selected_genes |
| chr1  | 206661225 | 206661352 | IKBKE  | 693_selected_genes |
| chr1  | 206664126 | 206664216 | IKBKE  | 693_selected_genes |
| chr1  | 206664955 | 206665107 | IKBKE  | 693_selected_genes |
| chr1  | 206666330 | 206666477 | IKBKE  | 693_selected_genes |
| chr1  | 206666573 | 206666736 | IKBKE  | 693_selected_genes |
| chr1  | 206667227 | 206667349 | IKBKE  | 693_selected_genes |
| chr1  | 206669419 | 206669503 | IKBKE  | 693_selected_genes |
| chr7  | 50358632  | 50358722  | IKZF1  | 693_selected_genes |
| chr7  | 50367208  | 50367378  | IKZF1  | 693_selected_genes |
| chr7  | 50435678  | 50436093  | IKZF1  | 693_selected_genes |
| chr7  | 50437194  | 50437258  | IKZF1  | 693_selected_genes |
| chr7  | 50444205  | 50444516  | IKZF1  | 693_selected_genes |
| chr7  | 50450212  | 50450430  | IKZF1  | 693_selected_genes |
| chr7  | 50455017  | 50455193  | IKZF1  | 693_selected_genes |
| chr7  | 50459401  | 50459586  | IKZF1  | 693_selected_genes |
| chr7  | 50467590  | 50468350  | IKZF1  | 693_selected_genes |
| chr1  | 206941955 | 206942098 | IL10   | 693_selected_genes |
| chr1  | 206943148 | 206943264 | IL10   | 693_selected_genes |
| chr1  | 206944226 | 206944429 | IL10   | 693_selected_genes |
| chr1  | 206944675 | 206944785 | IL10   | 693_selected_genes |
| chr1  | 206945590 | 206945805 | IL10   | 693_selected_genes |
| chr5  | 35857054  | 35857186  | IL7R   | 693_selected_genes |
| chr5  | 35860928  | 35861117  | IL7R   | 693_selected_genes |
| chr5  | 35867382  | 35867664  | IL7R   | 693_selected_genes |
| chr5  | 35871132  | 35871340  | IL7R   | 693_selected_genes |
| chr5  | 35873556  | 35873775  | IL7R   | 693_selected_genes |
| chr5  | 35874525  | 35874669  | IL7R   | 693_selected_genes |
| chr5  | 35875490  | 35875718  | IL7R   | 693_selected_genes |
| chr5  | 35876059  | 35876613  | IL7R   | 693_selected_genes |
| chr13 | 111365295 | 111365349 | ING1   | 693_selected_genes |
| chr13 | 111366471 | 111366657 | ING1   | 693_selected_genes |
| chr13 | 111367765 | 111368380 | ING1   | 693_selected_genes |
| chr13 | 111371550 | 111372304 | ING1   | 693_selected_genes |
| chr7  | 41729222  | 41730165  | INHBA  | 693_selected_genes |
| chr7  | 41739559  | 41739997  | INHBA  | 693_selected_genes |
| chr4  | 142949909 | 142950092 | INPP4B | 693_selected_genes |
| chr4  | 142951255 | 142951480 | INPP4B | 693_selected_genes |
| chr4  | 143003158 | 143003363 | INPP4B | 693_selected_genes |
| chr4  | 143007271 | 143007434 | INPP4B | 693_selected_genes |
| chr4  | 143029220 | 143029368 | INPP4B | 693_selected_genes |
| chr4  | 143033669 | 143033860 | INPP4B | 693_selected_genes |
| chr4  | 143043255 | 143043423 | INPP4B | 693_selected_genes |
| chr4  | 143044419 | 143044593 | INPP4B | 693_selected_genes |
| chr4  | 143045715 | 143045938 | INPP4B | 693_selected_genes |
| chr4  | 143066967 | 143067174 | INPP4B | 693_selected_genes |
| chr4  | 143081485 | 143081739 | INPP4B | 693_selected_genes |
| chr4  | 143094759 | 143094987 | INPP4B | 693_selected_genes |
| chr4  | 143114214 | 143114373 | INPP4B | 693_selected_genes |
| chr4  | 143129552 | 143129707 | INPP4B | 693_selected_genes |

|       |           |           |        |                    |
|-------|-----------|-----------|--------|--------------------|
| chr4  | 143130023 | 143130204 | INPP4B | 693_selected_genes |
| chr4  | 143158991 | 143159189 | INPP4B | 693_selected_genes |
| chr4  | 143181619 | 143181742 | INPP4B | 693_selected_genes |
| chr4  | 143191790 | 143191952 | INPP4B | 693_selected_genes |
| chr4  | 143226585 | 143226715 | INPP4B | 693_selected_genes |
| chr4  | 143226827 | 143226913 | INPP4B | 693_selected_genes |
| chr4  | 143235839 | 143235940 | INPP4B | 693_selected_genes |
| chr4  | 143268654 | 143268734 | INPP4B | 693_selected_genes |
| chr4  | 143305220 | 143305294 | INPP4B | 693_selected_genes |
| chr4  | 143324065 | 143324232 | INPP4B | 693_selected_genes |
| chr4  | 143326333 | 143326502 | INPP4B | 693_selected_genes |
| chr4  | 143344937 | 143344995 | INPP4B | 693_selected_genes |
| chr4  | 143348579 | 143348655 | INPP4B | 693_selected_genes |
| chr4  | 143350300 | 143350395 | INPP4B | 693_selected_genes |
| chr4  | 143352296 | 143352437 | INPP4B | 693_selected_genes |
| chr11 | 71936003  | 71936235  | INPPL1 | 693_selected_genes |
| chr11 | 71939208  | 71939322  | INPPL1 | 693_selected_genes |
| chr11 | 71939366  | 71939567  | INPPL1 | 693_selected_genes |
| chr11 | 71939745  | 71939916  | INPPL1 | 693_selected_genes |
| chr11 | 71940108  | 71940299  | INPPL1 | 693_selected_genes |
| chr11 | 71940483  | 71940627  | INPPL1 | 693_selected_genes |
| chr11 | 71940681  | 71940821  | INPPL1 | 693_selected_genes |
| chr11 | 71940942  | 71941088  | INPPL1 | 693_selected_genes |
| chr11 | 71941139  | 71941340  | INPPL1 | 693_selected_genes |
| chr11 | 71941380  | 71941537  | INPPL1 | 693_selected_genes |
| chr11 | 71941814  | 71941967  | INPPL1 | 693_selected_genes |
| chr11 | 71942011  | 71942258  | INPPL1 | 693_selected_genes |
| chr11 | 71942516  | 71942684  | INPPL1 | 693_selected_genes |
| chr11 | 71943258  | 71943405  | INPPL1 | 693_selected_genes |
| chr11 | 71943644  | 71943833  | INPPL1 | 693_selected_genes |
| chr11 | 71943893  | 71944043  | INPPL1 | 693_selected_genes |
| chr11 | 71944093  | 71944232  | INPPL1 | 693_selected_genes |
| chr11 | 71944459  | 71944591  | INPPL1 | 693_selected_genes |
| chr11 | 71944673  | 71944813  | INPPL1 | 693_selected_genes |
| chr11 | 71945299  | 71945463  | INPPL1 | 693_selected_genes |
| chr11 | 71945545  | 71945684  | INPPL1 | 693_selected_genes |
| chr11 | 71946134  | 71946272  | INPPL1 | 693_selected_genes |
| chr11 | 71946314  | 71946520  | INPPL1 | 693_selected_genes |
| chr11 | 71946693  | 71946822  | INPPL1 | 693_selected_genes |
| chr11 | 71946864  | 71947055  | INPPL1 | 693_selected_genes |
| chr11 | 71948142  | 71948865  | INPPL1 | 693_selected_genes |
| chr11 | 71949060  | 71949422  | INPPL1 | 693_selected_genes |
| chr19 | 7117041   | 7117446   | INSR   | 693_selected_genes |
| chr19 | 7119434   | 7119619   | INSR   | 693_selected_genes |
| chr19 | 7120605   | 7120785   | INSR   | 693_selected_genes |
| chr19 | 7122599   | 7122809   | INSR   | 693_selected_genes |
| chr19 | 7122864   | 7123025   | INSR   | 693_selected_genes |
| chr19 | 7125268   | 7125563   | INSR   | 693_selected_genes |
| chr19 | 7126569   | 7126687   | INSR   | 693_selected_genes |
| chr19 | 7128837   | 7128990   | INSR   | 693_selected_genes |
| chr19 | 7132143   | 7132353   | INSR   | 693_selected_genes |
| chr19 | 7141662   | 7141852   | INSR   | 693_selected_genes |
| chr19 | 7142801   | 7143126   | INSR   | 693_selected_genes |
| chr19 | 7150482   | 7150568   | INSR   | 693_selected_genes |
| chr19 | 7152711   | 7152963   | INSR   | 693_selected_genes |
| chr19 | 7159602   | 7159681   | INSR   | 693_selected_genes |
| chr19 | 7163017   | 7163235   | INSR   | 693_selected_genes |
| chr19 | 7166139   | 7166440   | INSR   | 693_selected_genes |
| chr19 | 7167953   | 7168130   | INSR   | 693_selected_genes |
| chr19 | 7170522   | 7170787   | INSR   | 693_selected_genes |
| chr19 | 7172275   | 7172470   | INSR   | 693_selected_genes |
| chr19 | 7174568   | 7174767   | INSR   | 693_selected_genes |
| chr19 | 7184301   | 7184673   | INSR   | 693_selected_genes |
| chr19 | 7267330   | 7267932   | INSR   | 693_selected_genes |
| chr19 | 7293777   | 7293927   | INSR   | 693_selected_genes |
| chr6  | 393127    | 393393    | IRF4   | 693_selected_genes |
| chr6  | 394795    | 395032    | IRF4   | 693_selected_genes |
| chr6  | 395821    | 395960    | IRF4   | 693_selected_genes |
| chr6  | 397082    | 397277    | IRF4   | 693_selected_genes |
| chr6  | 398802    | 398960    | IRF4   | 693_selected_genes |
| chr6  | 401398    | 401802    | IRF4   | 693_selected_genes |
| chr6  | 404992    | 405155    | IRF4   | 693_selected_genes |
| chr6  | 406740    | 406811    | IRF4   | 693_selected_genes |
| chr6  | 407429    | 407623    | IRF4   | 693_selected_genes |
| chr2  | 227659700 | 227663479 | IRS1   | 693_selected_genes |
| chr13 | 110408625 | 110408680 | IRS2   | 693_selected_genes |
| chr13 | 110434363 | 110438425 | IRS2   | 693_selected_genes |
| chr20 | 10620120  | 10620628  | JAG1   | 693_selected_genes |
| chr20 | 10621405  | 10621606  | JAG1   | 693_selected_genes |
| chr20 | 10621735  | 10621917  | JAG1   | 693_selected_genes |
| chr20 | 10622082  | 10622366  | JAG1   | 693_selected_genes |
| chr20 | 10622405  | 10622565  | JAG1   | 693_selected_genes |
| chr20 | 10623110  | 10623274  | JAG1   | 693_selected_genes |
| chr20 | 10624400  | 10624536  | JAG1   | 693_selected_genes |

|       |           |           |      |                    |
|-------|-----------|-----------|------|--------------------|
| chr20 | 10624979  | 10625057  | JAG1 | 693_selected_genes |
| chr20 | 10625485  | 10625652  | JAG1 | 693_selected_genes |
| chr20 | 10625765  | 10625929  | JAG1 | 693_selected_genes |
| chr20 | 10625978  | 10626142  | JAG1 | 693_selected_genes |
| chr20 | 10626593  | 10626757  | JAG1 | 693_selected_genes |
| chr20 | 10627561  | 10627776  | JAG1 | 693_selected_genes |
| chr20 | 10628582  | 10628783  | JAG1 | 693_selected_genes |
| chr20 | 10629171  | 10629395  | JAG1 | 693_selected_genes |
| chr20 | 10629683  | 10629780  | JAG1 | 693_selected_genes |
| chr20 | 10630144  | 10630308  | JAG1 | 693_selected_genes |
| chr20 | 10630869  | 10631033  | JAG1 | 693_selected_genes |
| chr20 | 10632203  | 10632367  | JAG1 | 693_selected_genes |
| chr20 | 10632753  | 10632923  | JAG1 | 693_selected_genes |
| chr20 | 10633090  | 10633271  | JAG1 | 693_selected_genes |
| chr20 | 10637020  | 10637131  | JAG1 | 693_selected_genes |
| chr20 | 10639090  | 10639395  | JAG1 | 693_selected_genes |
| chr20 | 10644585  | 10644687  | JAG1 | 693_selected_genes |
| chr20 | 10653323  | 10653679  | JAG1 | 693_selected_genes |
| chr20 | 10654072  | 10654203  | JAG1 | 693_selected_genes |
| chr14 | 105609006 | 105609532 | JAG2 | 693_selected_genes |
| chr14 | 105609793 | 105610000 | JAG2 | 693_selected_genes |
| chr14 | 105611241 | 105611423 | JAG2 | 693_selected_genes |
| chr14 | 105612042 | 105612335 | JAG2 | 693_selected_genes |
| chr14 | 105612696 | 105612862 | JAG2 | 693_selected_genes |
| chr14 | 105612922 | 105613086 | JAG2 | 693_selected_genes |
| chr14 | 105613637 | 105613773 | JAG2 | 693_selected_genes |
| chr14 | 105613811 | 105613889 | JAG2 | 693_selected_genes |
| chr14 | 105614083 | 105614250 | JAG2 | 693_selected_genes |
| chr14 | 105614427 | 105614591 | JAG2 | 693_selected_genes |
| chr14 | 105614637 | 105614801 | JAG2 | 693_selected_genes |
| chr14 | 105615056 | 105615220 | JAG2 | 693_selected_genes |
| chr14 | 105615248 | 105615451 | JAG2 | 693_selected_genes |
| chr14 | 105615481 | 105615682 | JAG2 | 693_selected_genes |
| chr14 | 105616915 | 105617139 | JAG2 | 693_selected_genes |
| chr14 | 105617176 | 105617273 | JAG2 | 693_selected_genes |
| chr14 | 105617302 | 105617466 | JAG2 | 693_selected_genes |
| chr14 | 105617594 | 105617758 | JAG2 | 693_selected_genes |
| chr14 | 105617937 | 105618101 | JAG2 | 693_selected_genes |
| chr14 | 105618249 | 105618419 | JAG2 | 693_selected_genes |
| chr14 | 105618472 | 105618653 | JAG2 | 693_selected_genes |
| chr14 | 105621873 | 105621984 | JAG2 | 693_selected_genes |
| chr14 | 105622049 | 105622351 | JAG2 | 693_selected_genes |
| chr14 | 105624017 | 105624125 | JAG2 | 693_selected_genes |
| chr14 | 105634068 | 105634469 | JAG2 | 693_selected_genes |
| chr14 | 105634666 | 105634782 | JAG2 | 693_selected_genes |
| chr1  | 65300219  | 65300365  | JAK1 | 693_selected_genes |
| chr1  | 65301053  | 65301214  | JAK1 | 693_selected_genes |
| chr1  | 65301755  | 65301923  | JAK1 | 693_selected_genes |
| chr1  | 65303589  | 65303812  | JAK1 | 693_selected_genes |
| chr1  | 65304122  | 65304297  | JAK1 | 693_selected_genes |
| chr1  | 65305260  | 65305503  | JAK1 | 693_selected_genes |
| chr1  | 65306902  | 65307047  | JAK1 | 693_selected_genes |
| chr1  | 65307108  | 65307309  | JAK1 | 693_selected_genes |
| chr1  | 65309721  | 65309923  | JAK1 | 693_selected_genes |
| chr1  | 65310411  | 65310597  | JAK1 | 693_selected_genes |
| chr1  | 65311170  | 65311348  | JAK1 | 693_selected_genes |
| chr1  | 65312306  | 65312444  | JAK1 | 693_selected_genes |
| chr1  | 65313189  | 65313383  | JAK1 | 693_selected_genes |
| chr1  | 65316461  | 65316618  | JAK1 | 693_selected_genes |
| chr1  | 65321166  | 65321406  | JAK1 | 693_selected_genes |
| chr1  | 65323313  | 65323487  | JAK1 | 693_selected_genes |
| chr1  | 65325762  | 65325970  | JAK1 | 693_selected_genes |
| chr1  | 65330444  | 65330680  | JAK1 | 693_selected_genes |
| chr1  | 65332523  | 65332916  | JAK1 | 693_selected_genes |
| chr1  | 65334968  | 65335182  | JAK1 | 693_selected_genes |
| chr1  | 65339027  | 65339231  | JAK1 | 693_selected_genes |
| chr1  | 65344682  | 65344856  | JAK1 | 693_selected_genes |
| chr1  | 65348934  | 65349183  | JAK1 | 693_selected_genes |
| chr1  | 65351916  | 65351972  | JAK1 | 693_selected_genes |
| chr9  | 5021962   | 5022238   | JAK2 | 693_selected_genes |
| chr9  | 5029757   | 5029931   | JAK2 | 693_selected_genes |
| chr9  | 5044377   | 5044545   | JAK2 | 693_selected_genes |
| chr9  | 5050660   | 5050856   | JAK2 | 693_selected_genes |
| chr9  | 5054537   | 5054909   | JAK2 | 693_selected_genes |
| chr9  | 5055643   | 5055813   | JAK2 | 693_selected_genes |
| chr9  | 5064857   | 5065065   | JAK2 | 693_selected_genes |
| chr9  | 5066652   | 5066814   | JAK2 | 693_selected_genes |
| chr9  | 5068996   | 5069233   | JAK2 | 693_selected_genes |
| chr9  | 5069899   | 5070077   | JAK2 | 693_selected_genes |
| chr9  | 5072466   | 5072651   | JAK2 | 693_selected_genes |
| chr9  | 5073672   | 5073810   | JAK2 | 693_selected_genes |
| chr9  | 5077427   | 5077605   | JAK2 | 693_selected_genes |
| chr9  | 5078280   | 5078469   | JAK2 | 693_selected_genes |
| chr9  | 5080203   | 5080405   | JAK2 | 693_selected_genes |

|       |           |           |       |                    |
|-------|-----------|-----------|-------|--------------------|
| chr9  | 5080507   | 5080708   | JAK2  | 693_selected_genes |
| chr9  | 5081699   | 5081886   | JAK2  | 693_selected_genes |
| chr9  | 5089648   | 5089888   | JAK2  | 693_selected_genes |
| chr9  | 5090420   | 5090595   | JAK2  | 693_selected_genes |
| chr9  | 5090713   | 5090936   | JAK2  | 693_selected_genes |
| chr9  | 5122978   | 5123146   | JAK2  | 693_selected_genes |
| chr9  | 5126307   | 5126471   | JAK2  | 693_selected_genes |
| chr9  | 5126658   | 5126816   | JAK2  | 693_selected_genes |
| chr19 | 17937526  | 17937744  | JAK3  | 693_selected_genes |
| chr19 | 17940813  | 17941052  | JAK3  | 693_selected_genes |
| chr19 | 17941286  | 17941454  | JAK3  | 693_selected_genes |
| chr19 | 17942011  | 17942234  | JAK3  | 693_selected_genes |
| chr19 | 17942457  | 17942632  | JAK3  | 693_selected_genes |
| chr19 | 17943302  | 17943542  | JAK3  | 693_selected_genes |
| chr19 | 17943573  | 17943763  | JAK3  | 693_selected_genes |
| chr19 | 17945354  | 17945555  | JAK3  | 693_selected_genes |
| chr19 | 17945635  | 17945837  | JAK3  | 693_selected_genes |
| chr19 | 17945866  | 17946049  | JAK3  | 693_selected_genes |
| chr19 | 17946707  | 17946885  | JAK3  | 693_selected_genes |
| chr19 | 17947912  | 17948047  | JAK3  | 693_selected_genes |
| chr19 | 17948715  | 17948897  | JAK3  | 693_selected_genes |
| chr19 | 17949046  | 17949224  | JAK3  | 693_selected_genes |
| chr19 | 17950260  | 17950497  | JAK3  | 693_selected_genes |
| chr19 | 17951013  | 17951175  | JAK3  | 693_selected_genes |
| chr19 | 17952172  | 17952380  | JAK3  | 693_selected_genes |
| chr19 | 17952423  | 17952596  | JAK3  | 693_selected_genes |
| chr19 | 17953099  | 17953444  | JAK3  | 693_selected_genes |
| chr19 | 17953810  | 17954006  | JAK3  | 693_selected_genes |
| chr19 | 17954163  | 17954325  | JAK3  | 693_selected_genes |
| chr19 | 17954560  | 17954734  | JAK3  | 693_selected_genes |
| chr19 | 17955017  | 17955251  | JAK3  | 693_selected_genes |
| chr1  | 59247721  | 59248767  | JUN   | 693_selected_genes |
| chr3  | 123798844 | 123798964 | KALRN | 693_selected_genes |
| chr3  | 123801074 | 123801204 | KALRN | 693_selected_genes |
| chr3  | 123813659 | 123813776 | KALRN | 693_selected_genes |
| chr3  | 123946811 | 123946936 | KALRN | 693_selected_genes |
| chr3  | 123953650 | 123953815 | KALRN | 693_selected_genes |
| chr3  | 123983319 | 123983562 | KALRN | 693_selected_genes |
| chr3  | 123987564 | 123988127 | KALRN | 693_selected_genes |
| chr3  | 124017612 | 124017785 | KALRN | 693_selected_genes |
| chr3  | 124044801 | 124045043 | KALRN | 693_selected_genes |
| chr3  | 124048682 | 124048864 | KALRN | 693_selected_genes |
| chr3  | 124053086 | 124053367 | KALRN | 693_selected_genes |
| chr3  | 124065964 | 124066137 | KALRN | 693_selected_genes |
| chr3  | 124103666 | 124103908 | KALRN | 693_selected_genes |
| chr3  | 124113956 | 124114270 | KALRN | 693_selected_genes |
| chr3  | 124117518 | 124117743 | KALRN | 693_selected_genes |
| chr3  | 124132291 | 124132537 | KALRN | 693_selected_genes |
| chr3  | 124141633 | 124141850 | KALRN | 693_selected_genes |
| chr3  | 124149477 | 124149647 | KALRN | 693_selected_genes |
| chr3  | 124153128 | 124153397 | KALRN | 693_selected_genes |
| chr3  | 124157709 | 124157909 | KALRN | 693_selected_genes |
| chr3  | 124160766 | 124160931 | KALRN | 693_selected_genes |
| chr3  | 124164982 | 124165148 | KALRN | 693_selected_genes |
| chr3  | 124165584 | 124165757 | KALRN | 693_selected_genes |
| chr3  | 124173998 | 124174231 | KALRN | 693_selected_genes |
| chr3  | 124175431 | 124175600 | KALRN | 693_selected_genes |
| chr3  | 124180711 | 124180828 | KALRN | 693_selected_genes |
| chr3  | 124181345 | 124181505 | KALRN | 693_selected_genes |
| chr3  | 124193484 | 124193604 | KALRN | 693_selected_genes |
| chr3  | 124196066 | 124196206 | KALRN | 693_selected_genes |
| chr3  | 124201629 | 124201772 | KALRN | 693_selected_genes |
| chr3  | 124207025 | 124207187 | KALRN | 693_selected_genes |
| chr3  | 124209515 | 124209756 | KALRN | 693_selected_genes |
| chr3  | 124210144 | 124210296 | KALRN | 693_selected_genes |
| chr3  | 124211561 | 124211754 | KALRN | 693_selected_genes |
| chr3  | 124215132 | 124215285 | KALRN | 693_selected_genes |
| chr3  | 124223724 | 124223822 | KALRN | 693_selected_genes |
| chr3  | 124237221 | 124237334 | KALRN | 693_selected_genes |
| chr3  | 124281664 | 124281961 | KALRN | 693_selected_genes |
| chr3  | 124303643 | 124303778 | KALRN | 693_selected_genes |
| chr3  | 124351241 | 124351575 | KALRN | 693_selected_genes |
| chr3  | 124352670 | 124352825 | KALRN | 693_selected_genes |
| chr3  | 124356029 | 124356175 | KALRN | 693_selected_genes |
| chr3  | 124369629 | 124369810 | KALRN | 693_selected_genes |
| chr3  | 124374422 | 124374539 | KALRN | 693_selected_genes |
| chr3  | 124376269 | 124376423 | KALRN | 693_selected_genes |
| chr3  | 124376555 | 124376675 | KALRN | 693_selected_genes |
| chr3  | 124377252 | 124377389 | KALRN | 693_selected_genes |
| chr3  | 124378186 | 124378329 | KALRN | 693_selected_genes |
| chr3  | 124379744 | 124379845 | KALRN | 693_selected_genes |
| chr3  | 124380672 | 124380800 | KALRN | 693_selected_genes |
| chr3  | 124385270 | 124385506 | KALRN | 693_selected_genes |
| chr3  | 124385833 | 124386055 | KALRN | 693_selected_genes |

|       |           |           |       |                    |
|-------|-----------|-----------|-------|--------------------|
| chr3  | 124390481 | 124390770 | KALRN | 693_selected_genes |
| chr3  | 124393182 | 124393490 | KALRN | 693_selected_genes |
| chr3  | 124396385 | 124396479 | KALRN | 693_selected_genes |
| chr3  | 124397011 | 124397185 | KALRN | 693_selected_genes |
| chr3  | 124398279 | 124398533 | KALRN | 693_selected_genes |
| chr3  | 124412625 | 124412703 | KALRN | 693_selected_genes |
| chr3  | 124413153 | 124413375 | KALRN | 693_selected_genes |
| chr3  | 124414955 | 124415127 | KALRN | 693_selected_genes |
| chr3  | 124416414 | 124416596 | KALRN | 693_selected_genes |
| chr3  | 124418690 | 124418905 | KALRN | 693_selected_genes |
| chr3  | 124420859 | 124420988 | KALRN | 693_selected_genes |
| chr3  | 124431756 | 124432007 | KALRN | 693_selected_genes |
| chr3  | 124436068 | 124436257 | KALRN | 693_selected_genes |
| chr3  | 124437746 | 124438342 | KALRN | 693_selected_genes |
| chr8  | 41789697  | 41792410  | KAT6A | 693_selected_genes |
| chr8  | 41794748  | 41795111  | KAT6A | 693_selected_genes |
| chr8  | 41798334  | 41798987  | KAT6A | 693_selected_genes |
| chr8  | 41800273  | 41800543  | KAT6A | 693_selected_genes |
| chr8  | 41801240  | 41801522  | KAT6A | 693_selected_genes |
| chr8  | 41804083  | 41804227  | KAT6A | 693_selected_genes |
| chr8  | 41805243  | 41805455  | KAT6A | 693_selected_genes |
| chr8  | 41806714  | 41806906  | KAT6A | 693_selected_genes |
| chr8  | 41812788  | 41812954  | KAT6A | 693_selected_genes |
| chr8  | 41814541  | 41814813  | KAT6A | 693_selected_genes |
| chr8  | 41832196  | 41832365  | KAT6A | 693_selected_genes |
| chr8  | 41834500  | 41834870  | KAT6A | 693_selected_genes |
| chr8  | 41836134  | 41836320  | KAT6A | 693_selected_genes |
| chr8  | 41838338  | 41838470  | KAT6A | 693_selected_genes |
| chr8  | 41839331  | 41839497  | KAT6A | 693_selected_genes |
| chr8  | 41844947  | 41845106  | KAT6A | 693_selected_genes |
| chr8  | 41905870  | 41906520  | KAT6A | 693_selected_genes |
| chr7  | 150642427 | 150642627 | KCNH2 | 693_selected_genes |
| chr7  | 150643939 | 150644167 | KCNH2 | 693_selected_genes |
| chr7  | 150644390 | 150644627 | KCNH2 | 693_selected_genes |
| chr7  | 150644668 | 150644991 | KCNH2 | 693_selected_genes |
| chr7  | 150645506 | 150645656 | KCNH2 | 693_selected_genes |
| chr7  | 150645918 | 150646162 | KCNH2 | 693_selected_genes |
| chr7  | 150646961 | 150647533 | KCNH2 | 693_selected_genes |
| chr7  | 150647983 | 150648233 | KCNH2 | 693_selected_genes |
| chr7  | 150648510 | 150648948 | KCNH2 | 693_selected_genes |
| chr7  | 150649487 | 150649966 | KCNH2 | 693_selected_genes |
| chr7  | 150652458 | 150652616 | KCNH2 | 693_selected_genes |
| chr7  | 150654353 | 150654615 | KCNH2 | 693_selected_genes |
| chr7  | 150655121 | 150655615 | KCNH2 | 693_selected_genes |
| chr7  | 150656634 | 150656868 | KCNH2 | 693_selected_genes |
| chr7  | 150671773 | 150672054 | KCNH2 | 693_selected_genes |
| chr7  | 150674900 | 150675026 | KCNH2 | 693_selected_genes |
| chr11 | 2465890   | 2465963   | KCNQ1 | 693_selected_genes |
| chr11 | 2466303   | 2466739   | KCNQ1 | 693_selected_genes |
| chr11 | 2482914   | 2482969   | KCNQ1 | 693_selected_genes |
| chr11 | 2483098   | 2483232   | KCNQ1 | 693_selected_genes |
| chr11 | 2542683   | 2542825   | KCNQ1 | 693_selected_genes |
| chr11 | 2549132   | 2549273   | KCNQ1 | 693_selected_genes |
| chr11 | 2591832   | 2592009   | KCNQ1 | 693_selected_genes |
| chr11 | 2592529   | 2592658   | KCNQ1 | 693_selected_genes |
| chr11 | 2593217   | 2593364   | KCNQ1 | 693_selected_genes |
| chr11 | 2594050   | 2594241   | KCNQ1 | 693_selected_genes |
| chr11 | 2604639   | 2604800   | KCNQ1 | 693_selected_genes |
| chr11 | 2606416   | 2606562   | KCNQ1 | 693_selected_genes |
| chr11 | 2608774   | 2608947   | KCNQ1 | 693_selected_genes |
| chr11 | 2609917   | 2610109   | KCNQ1 | 693_selected_genes |
| chr11 | 2683165   | 2683336   | KCNQ1 | 693_selected_genes |
| chr11 | 2790048   | 2790174   | KCNQ1 | 693_selected_genes |
| chr11 | 2797164   | 2797309   | KCNQ1 | 693_selected_genes |
| chr11 | 2798190   | 2798287   | KCNQ1 | 693_selected_genes |
| chr11 | 2799180   | 2799292   | KCNQ1 | 693_selected_genes |
| chr11 | 2868971   | 2869258   | KCNQ1 | 693_selected_genes |
| chr12 | 394596    | 394853    | KDM5A | 693_selected_genes |
| chr12 | 395303    | 395398    | KDM5A | 693_selected_genes |
| chr12 | 401899    | 402360    | KDM5A | 693_selected_genes |
| chr12 | 404713    | 404984    | KDM5A | 693_selected_genes |
| chr12 | 406181    | 406391    | KDM5A | 693_selected_genes |
| chr12 | 416086    | 416280    | KDM5A | 693_selected_genes |
| chr12 | 416594    | 417196    | KDM5A | 693_selected_genes |
| chr12 | 418943    | 419155    | KDM5A | 693_selected_genes |
| chr12 | 420025    | 420255    | KDM5A | 693_selected_genes |
| chr12 | 422196    | 422385    | KDM5A | 693_selected_genes |
| chr12 | 427246    | 427652    | KDM5A | 693_selected_genes |
| chr12 | 430135    | 430300    | KDM5A | 693_selected_genes |
| chr12 | 431557    | 431758    | KDM5A | 693_selected_genes |
| chr12 | 432222    | 432397    | KDM5A | 693_selected_genes |
| chr12 | 432740    | 432972    | KDM5A | 693_selected_genes |
| chr12 | 437975    | 438220    | KDM5A | 693_selected_genes |
| chr12 | 440959    | 441129    | KDM5A | 693_selected_genes |

|       |          |          |       |                    |
|-------|----------|----------|-------|--------------------|
| chr12 | 442627   | 442840   | KDM5A | 693_selected_genes |
| chr12 | 443381   | 443613   | KDM5A | 693_selected_genes |
| chr12 | 459761   | 459970   | KDM5A | 693_selected_genes |
| chr12 | 461345   | 461515   | KDM5A | 693_selected_genes |
| chr12 | 463216   | 463425   | KDM5A | 693_selected_genes |
| chr12 | 464298   | 464440   | KDM5A | 693_selected_genes |
| chr12 | 465572   | 465728   | KDM5A | 693_selected_genes |
| chr12 | 472103   | 472288   | KDM5A | 693_selected_genes |
| chr12 | 475074   | 475295   | KDM5A | 693_selected_genes |
| chr12 | 493171   | 493344   | KDM5A | 693_selected_genes |
| chr12 | 495037   | 495165   | KDM5A | 693_selected_genes |
| chr12 | 496388   | 496465   | KDM5A | 693_selected_genes |
| chr12 | 497373   | 497531   | KDM5A | 693_selected_genes |
| chr12 | 498067   | 498282   | KDM5A | 693_selected_genes |
| chrX  | 53221900 | 53222044 | KDM5C | 693_selected_genes |
| chrX  | 53222123 | 53222539 | KDM5C | 693_selected_genes |
| chrX  | 53222593 | 53222843 | KDM5C | 693_selected_genes |
| chrX  | 53222929 | 53223058 | KDM5C | 693_selected_genes |
| chrX  | 53223295 | 53223945 | KDM5C | 693_selected_genes |
| chrX  | 53224087 | 53224275 | KDM5C | 693_selected_genes |
| chrX  | 53224387 | 53224617 | KDM5C | 693_selected_genes |
| chrX  | 53225072 | 53225261 | KDM5C | 693_selected_genes |
| chrX  | 53225842 | 53226251 | KDM5C | 693_selected_genes |
| chrX  | 53226927 | 53227083 | KDM5C | 693_selected_genes |
| chrX  | 53227646 | 53227844 | KDM5C | 693_selected_genes |
| chrX  | 53227920 | 53228095 | KDM5C | 693_selected_genes |
| chrX  | 53228133 | 53228365 | KDM5C | 693_selected_genes |
| chrX  | 53230706 | 53230951 | KDM5C | 693_selected_genes |
| chrX  | 53231010 | 53231180 | KDM5C | 693_selected_genes |
| chrX  | 53239570 | 53239783 | KDM5C | 693_selected_genes |
| chrX  | 53239832 | 53240064 | KDM5C | 693_selected_genes |
| chrX  | 53240653 | 53240862 | KDM5C | 693_selected_genes |
| chrX  | 53240943 | 53241113 | KDM5C | 693_selected_genes |
| chrX  | 53243845 | 53244054 | KDM5C | 693_selected_genes |
| chrX  | 53244951 | 53245183 | KDM5C | 693_selected_genes |
| chrX  | 53245230 | 53245404 | KDM5C | 693_selected_genes |
| chrX  | 53246299 | 53246484 | KDM5C | 693_selected_genes |
| chrX  | 53246952 | 53247173 | KDM5C | 693_selected_genes |
| chrX  | 53247432 | 53247605 | KDM5C | 693_selected_genes |
| chrX  | 53247797 | 53247919 | KDM5C | 693_selected_genes |
| chrX  | 53249995 | 53250123 | KDM5C | 693_selected_genes |
| chrX  | 53250875 | 53251000 | KDM5C | 693_selected_genes |
| chrX  | 53253896 | 53254096 | KDM5C | 693_selected_genes |
| chrX  | 44732772 | 44732983 | KDM6A | 693_selected_genes |
| chrX  | 44733144 | 44733258 | KDM6A | 693_selected_genes |
| chrX  | 44820503 | 44820662 | KDM6A | 693_selected_genes |
| chrX  | 44833885 | 44833985 | KDM6A | 693_selected_genes |
| chrX  | 44870180 | 44870289 | KDM6A | 693_selected_genes |
| chrX  | 44879829 | 44880000 | KDM6A | 693_selected_genes |
| chrX  | 44894150 | 44894255 | KDM6A | 693_selected_genes |
| chrX  | 44896874 | 44896959 | KDM6A | 693_selected_genes |
| chrX  | 44910928 | 44911072 | KDM6A | 693_selected_genes |
| chrX  | 44913048 | 44913225 | KDM6A | 693_selected_genes |
| chrX  | 44918225 | 44918374 | KDM6A | 693_selected_genes |
| chrX  | 44918466 | 44918736 | KDM6A | 693_selected_genes |
| chrX  | 44919241 | 44919426 | KDM6A | 693_selected_genes |
| chrX  | 44919828 | 44920034 | KDM6A | 693_selected_genes |
| chrX  | 44920543 | 44920689 | KDM6A | 693_selected_genes |
| chrX  | 44921866 | 44922018 | KDM6A | 693_selected_genes |
| chrX  | 44922641 | 44923087 | KDM6A | 693_selected_genes |
| chrX  | 44928798 | 44929627 | KDM6A | 693_selected_genes |
| chrX  | 44935916 | 44936096 | KDM6A | 693_selected_genes |
| chrX  | 44937619 | 44937775 | KDM6A | 693_selected_genes |
| chrX  | 44938365 | 44938621 | KDM6A | 693_selected_genes |
| chrX  | 44941795 | 44941910 | KDM6A | 693_selected_genes |
| chrX  | 44941934 | 44942059 | KDM6A | 693_selected_genes |
| chrX  | 44942679 | 44942878 | KDM6A | 693_selected_genes |
| chrX  | 44945084 | 44945249 | KDM6A | 693_selected_genes |
| chrX  | 44948962 | 44949200 | KDM6A | 693_selected_genes |
| chrX  | 44949942 | 44950134 | KDM6A | 693_selected_genes |
| chrX  | 44965761 | 44965919 | KDM6A | 693_selected_genes |
| chrX  | 44966629 | 44966806 | KDM6A | 693_selected_genes |
| chrX  | 44969298 | 44969519 | KDM6A | 693_selected_genes |
| chrX  | 44970601 | 44970681 | KDM6A | 693_selected_genes |
| chr4  | 55946082 | 55946355 | KDR   | 693_selected_genes |
| chr4  | 55948097 | 55948233 | KDR   | 693_selected_genes |
| chr4  | 55948677 | 55948827 | KDR   | 693_selected_genes |
| chr4  | 55953748 | 55953950 | KDR   | 693_selected_genes |
| chr4  | 55955009 | 55955165 | KDR   | 693_selected_genes |
| chr4  | 55955515 | 55955665 | KDR   | 693_selected_genes |
| chr4  | 55955832 | 55955994 | KDR   | 693_selected_genes |
| chr4  | 55956097 | 55956270 | KDR   | 693_selected_genes |
| chr4  | 55958758 | 55958906 | KDR   | 693_selected_genes |
| chr4  | 55960943 | 55961147 | KDR   | 693_selected_genes |

|       |           |           |       |                    |
|-------|-----------|-----------|-------|--------------------|
| chr4  | 55961718  | 55961857  | KDR   | 693_selected_genes |
| chr4  | 55962370  | 55962534  | KDR   | 693_selected_genes |
| chr4  | 55963803  | 55963958  | KDR   | 693_selected_genes |
| chr4  | 55964278  | 55964464  | KDR   | 693_selected_genes |
| chr4  | 55964838  | 55964995  | KDR   | 693_selected_genes |
| chr4  | 55968038  | 55968220  | KDR   | 693_selected_genes |
| chr4  | 55968503  | 55968700  | KDR   | 693_selected_genes |
| chr4  | 55970784  | 55971176  | KDR   | 693_selected_genes |
| chr4  | 55971973  | 55972132  | KDR   | 693_selected_genes |
| chr4  | 55972828  | 55973002  | KDR   | 693_selected_genes |
| chr4  | 55973878  | 55974085  | KDR   | 693_selected_genes |
| chr4  | 55976544  | 55976758  | KDR   | 693_selected_genes |
| chr4  | 55976795  | 55976960  | KDR   | 693_selected_genes |
| chr4  | 55979445  | 55979673  | KDR   | 693_selected_genes |
| chr4  | 55980267  | 55980457  | KDR   | 693_selected_genes |
| chr4  | 55981015  | 55981234  | KDR   | 693_selected_genes |
| chr4  | 55981422  | 55981603  | KDR   | 693_selected_genes |
| chr4  | 55984745  | 55984992  | KDR   | 693_selected_genes |
| chr4  | 55987238  | 55987382  | KDR   | 693_selected_genes |
| chr4  | 55991368  | 55991485  | KDR   | 693_selected_genes |
| chr19 | 10597302  | 10597519  | KEAP1 | 693_selected_genes |
| chr19 | 10599842  | 10600069  | KEAP1 | 693_selected_genes |
| chr19 | 10600298  | 10600554  | KEAP1 | 693_selected_genes |
| chr19 | 10602227  | 10602963  | KEAP1 | 693_selected_genes |
| chr19 | 10610045  | 10610734  | KEAP1 | 693_selected_genes |
| chr19 | 10613891  | 10614259  | KEAP1 | 693_selected_genes |
| chr7  | 142638313 | 142638525 | KEL   | 693_selected_genes |
| chr7  | 142639495 | 142639641 | KEL   | 693_selected_genes |
| chr7  | 142639936 | 142640156 | KEL   | 693_selected_genes |
| chr7  | 142640337 | 142640455 | KEL   | 693_selected_genes |
| chr7  | 142640547 | 142640708 | KEL   | 693_selected_genes |
| chr7  | 142640844 | 142640995 | KEL   | 693_selected_genes |
| chr7  | 142641384 | 142641512 | KEL   | 693_selected_genes |
| chr7  | 142641704 | 142641853 | KEL   | 693_selected_genes |
| chr7  | 142643268 | 142643429 | KEL   | 693_selected_genes |
| chr7  | 142649570 | 142649750 | KEL   | 693_selected_genes |
| chr7  | 142650869 | 142651068 | KEL   | 693_selected_genes |
| chr7  | 142651245 | 142651484 | KEL   | 693_selected_genes |
| chr7  | 142651526 | 142651639 | KEL   | 693_selected_genes |
| chr7  | 142654888 | 142655085 | KEL   | 693_selected_genes |
| chr7  | 142655365 | 142655540 | KEL   | 693_selected_genes |
| chr7  | 142657989 | 142658216 | KEL   | 693_selected_genes |
| chr7  | 142658421 | 142658613 | KEL   | 693_selected_genes |
| chr7  | 142658856 | 142658984 | KEL   | 693_selected_genes |
| chr7  | 142659176 | 142659260 | KEL   | 693_selected_genes |
| chr7  | 142659265 | 142659318 | KEL   | 693_selected_genes |
| chr4  | 55524156  | 55524273  | KIT   | 693_selected_genes |
| chr4  | 55561652  | 55561972  | KIT   | 693_selected_genes |
| chr4  | 55564424  | 55564756  | KIT   | 693_selected_genes |
| chr4  | 55565770  | 55565957  | KIT   | 693_selected_genes |
| chr4  | 55569864  | 55570083  | KIT   | 693_selected_genes |
| chr4  | 55573238  | 55573478  | KIT   | 693_selected_genes |
| chr4  | 55575564  | 55575730  | KIT   | 693_selected_genes |
| chr4  | 55589724  | 55589889  | KIT   | 693_selected_genes |
| chr4  | 55591997  | 55592241  | KIT   | 693_selected_genes |
| chr4  | 55593358  | 55593515  | KIT   | 693_selected_genes |
| chr4  | 55593556  | 55593733  | KIT   | 693_selected_genes |
| chr4  | 55593963  | 55594118  | KIT   | 693_selected_genes |
| chr4  | 55594151  | 55594312  | KIT   | 693_selected_genes |
| chr4  | 55595475  | 55595676  | KIT   | 693_selected_genes |
| chr4  | 55597468  | 55597610  | KIT   | 693_selected_genes |
| chr4  | 55598011  | 55598189  | KIT   | 693_selected_genes |
| chr4  | 55599210  | 55599383  | KIT   | 693_selected_genes |
| chr4  | 55602638  | 55602800  | KIT   | 693_selected_genes |
| chr4  | 55602861  | 55603011  | KIT   | 693_selected_genes |
| chr4  | 55603315  | 55603471  | KIT   | 693_selected_genes |
| chr4  | 55604569  | 55604748  | KIT   | 693_selected_genes |
| chr9  | 110248006 | 110248232 | KLF4  | 693_selected_genes |
| chr9  | 110249283 | 110250573 | KLF4  | 693_selected_genes |
| chr9  | 110251185 | 110251356 | KLF4  | 693_selected_genes |
| chr9  | 110251423 | 110251478 | KLF4  | 693_selected_genes |
| chr13 | 73633440  | 73633751  | KLF5  | 693_selected_genes |
| chr13 | 73635973  | 73636897  | KLF5  | 693_selected_genes |
| chr13 | 73637936  | 73638046  | KLF5  | 693_selected_genes |
| chr13 | 73649820  | 73650049  | KLF5  | 693_selected_genes |
| chr3  | 183209689 | 183210041 | KLHL6 | 693_selected_genes |
| chr3  | 183210256 | 183210520 | KLHL6 | 693_selected_genes |
| chr3  | 183211841 | 183212094 | KLHL6 | 693_selected_genes |
| chr3  | 183217352 | 183217640 | KLHL6 | 693_selected_genes |
| chr3  | 183225821 | 183226321 | KLHL6 | 693_selected_genes |
| chr3  | 183245607 | 183245823 | KLHL6 | 693_selected_genes |
| chr3  | 183273123 | 183273466 | KLHL6 | 693_selected_genes |
| chr11 | 118307202 | 118307684 | KMT2A | 693_selected_genes |
| chr11 | 118309713 | 118309862 | KMT2A | 693_selected_genes |

|       |           |           |       |                    |
|-------|-----------|-----------|-------|--------------------|
| chr11 | 118318314 | 118318427 | KMT2A | 693_selected_genes |
| chr11 | 118339464 | 118339584 | KMT2A | 693_selected_genes |
| chr11 | 118342351 | 118345055 | KMT2A | 693_selected_genes |
| chr11 | 118347494 | 118347722 | KMT2A | 693_selected_genes |
| chr11 | 118348656 | 118348942 | KMT2A | 693_selected_genes |
| chr11 | 118350863 | 118350978 | KMT2A | 693_selected_genes |
| chr11 | 118352404 | 118352832 | KMT2A | 693_selected_genes |
| chr11 | 118353111 | 118353235 | KMT2A | 693_selected_genes |
| chr11 | 118354872 | 118355054 | KMT2A | 693_selected_genes |
| chr11 | 118355551 | 118355715 | KMT2A | 693_selected_genes |
| chr11 | 118359303 | 118359500 | KMT2A | 693_selected_genes |
| chr11 | 118360481 | 118360627 | KMT2A | 693_selected_genes |
| chr11 | 118360818 | 118360989 | KMT2A | 693_selected_genes |
| chr11 | 118361885 | 118362058 | KMT2A | 693_selected_genes |
| chr11 | 118362433 | 118362668 | KMT2A | 693_selected_genes |
| chr11 | 118363746 | 118363970 | KMT2A | 693_selected_genes |
| chr11 | 118364977 | 118365138 | KMT2A | 693_selected_genes |
| chr11 | 118365383 | 118365507 | KMT2A | 693_selected_genes |
| chr11 | 118366389 | 118366633 | KMT2A | 693_selected_genes |
| chr11 | 118366950 | 118367107 | KMT2A | 693_selected_genes |
| chr11 | 118368625 | 118368813 | KMT2A | 693_selected_genes |
| chr11 | 118369059 | 118369268 | KMT2A | 693_selected_genes |
| chr11 | 118369992 | 118370160 | KMT2A | 693_selected_genes |
| chr11 | 118370524 | 118370653 | KMT2A | 693_selected_genes |
| chr11 | 118371676 | 118371887 | KMT2A | 693_selected_genes |
| chr11 | 118372361 | 118372597 | KMT2A | 693_selected_genes |
| chr11 | 118373087 | 118377386 | KMT2A | 693_selected_genes |
| chr11 | 118378218 | 118378349 | KMT2A | 693_selected_genes |
| chr11 | 118379825 | 118379940 | KMT2A | 693_selected_genes |
| chr11 | 118380637 | 118380858 | KMT2A | 693_selected_genes |
| chr11 | 118382640 | 118382765 | KMT2A | 693_selected_genes |
| chr11 | 118390307 | 118390532 | KMT2A | 693_selected_genes |
| chr11 | 118390646 | 118390804 | KMT2A | 693_selected_genes |
| chr11 | 118391491 | 118391625 | KMT2A | 693_selected_genes |
| chr11 | 118391977 | 118392157 | KMT2A | 693_selected_genes |
| chr11 | 118392586 | 118392912 | KMT2A | 693_selected_genes |
| chr19 | 36208895  | 36209308  | KMT2B | 693_selected_genes |
| chr19 | 36210345  | 36210468  | KMT2B | 693_selected_genes |
| chr19 | 36210660  | 36212731  | KMT2B | 693_selected_genes |
| chr19 | 36213235  | 36213399  | KMT2B | 693_selected_genes |
| chr19 | 36213444  | 36213645  | KMT2B | 693_selected_genes |
| chr19 | 36213871  | 36214201  | KMT2B | 693_selected_genes |
| chr19 | 36214323  | 36214430  | KMT2B | 693_selected_genes |
| chr19 | 36214607  | 36214933  | KMT2B | 693_selected_genes |
| chr19 | 36215512  | 36215657  | KMT2B | 693_selected_genes |
| chr19 | 36215864  | 36216013  | KMT2B | 693_selected_genes |
| chr19 | 36216095  | 36216259  | KMT2B | 693_selected_genes |
| chr19 | 36216354  | 36216551  | KMT2B | 693_selected_genes |
| chr19 | 36216598  | 36216744  | KMT2B | 693_selected_genes |
| chr19 | 36217111  | 36217279  | KMT2B | 693_selected_genes |
| chr19 | 36218031  | 36218195  | KMT2B | 693_selected_genes |
| chr19 | 36218313  | 36218548  | KMT2B | 693_selected_genes |
| chr19 | 36218573  | 36218713  | KMT2B | 693_selected_genes |
| chr19 | 36218756  | 36218911  | KMT2B | 693_selected_genes |
| chr19 | 36218973  | 36219097  | KMT2B | 693_selected_genes |
| chr19 | 36219649  | 36219815  | KMT2B | 693_selected_genes |
| chr19 | 36219860  | 36220002  | KMT2B | 693_selected_genes |
| chr19 | 36220034  | 36220222  | KMT2B | 693_selected_genes |
| chr19 | 36220842  | 36221051  | KMT2B | 693_selected_genes |
| chr19 | 36221217  | 36221388  | KMT2B | 693_selected_genes |
| chr19 | 36221413  | 36221542  | KMT2B | 693_selected_genes |
| chr19 | 36221582  | 36221793  | KMT2B | 693_selected_genes |
| chr19 | 36222783  | 36223061  | KMT2B | 693_selected_genes |
| chr19 | 36223090  | 36224434  | KMT2B | 693_selected_genes |
| chr19 | 36224472  | 36224612  | KMT2B | 693_selected_genes |
| chr19 | 36224638  | 36224798  | KMT2B | 693_selected_genes |
| chr19 | 36227565  | 36227753  | KMT2B | 693_selected_genes |
| chr19 | 36227787  | 36227912  | KMT2B | 693_selected_genes |
| chr19 | 36227961  | 36228189  | KMT2B | 693_selected_genes |
| chr19 | 36228511  | 36228669  | KMT2B | 693_selected_genes |
| chr19 | 36228734  | 36228868  | KMT2B | 693_selected_genes |
| chr19 | 36228937  | 36229117  | KMT2B | 693_selected_genes |
| chr19 | 36229157  | 36229483  | KMT2B | 693_selected_genes |
| chr7  | 151833891 | 151834034 | KMT2C | 693_selected_genes |
| chr7  | 151835843 | 151836014 | KMT2C | 693_selected_genes |
| chr7  | 151836245 | 151836369 | KMT2C | 693_selected_genes |
| chr7  | 151836734 | 151836901 | KMT2C | 693_selected_genes |
| chr7  | 151841772 | 151841991 | KMT2C | 693_selected_genes |
| chr7  | 151842212 | 151842405 | KMT2C | 693_selected_genes |
| chr7  | 151843658 | 151843845 | KMT2C | 693_selected_genes |
| chr7  | 151845092 | 151846262 | KMT2C | 693_selected_genes |
| chr7  | 151847959 | 151848117 | KMT2C | 693_selected_genes |
| chr7  | 151848501 | 151848691 | KMT2C | 693_selected_genes |
| chr7  | 151849764 | 151850064 | KMT2C | 693_selected_genes |

|       |           |           |       |                    |
|-------|-----------|-----------|-------|--------------------|
| chr7  | 151851069 | 151851256 | KMT2C | 693_selected_genes |
| chr7  | 151851326 | 151851555 | KMT2C | 693_selected_genes |
| chr7  | 151852969 | 151853167 | KMT2C | 693_selected_genes |
| chr7  | 151853264 | 151853456 | KMT2C | 693_selected_genes |
| chr7  | 151854820 | 151855035 | KMT2C | 693_selected_genes |
| chr7  | 151855916 | 151856182 | KMT2C | 693_selected_genes |
| chr7  | 151859176 | 151860936 | KMT2C | 693_selected_genes |
| chr7  | 151864205 | 151864488 | KMT2C | 693_selected_genes |
| chr7  | 151866245 | 151866359 | KMT2C | 693_selected_genes |
| chr7  | 151868323 | 151868452 | KMT2C | 693_selected_genes |
| chr7  | 151871190 | 151871352 | KMT2C | 693_selected_genes |
| chr7  | 151873250 | 151875120 | KMT2C | 693_selected_genes |
| chr7  | 151876893 | 151877236 | KMT2C | 693_selected_genes |
| chr7  | 151877770 | 151879704 | KMT2C | 693_selected_genes |
| chr7  | 151880033 | 151880266 | KMT2C | 693_selected_genes |
| chr7  | 151882617 | 151882741 | KMT2C | 693_selected_genes |
| chr7  | 151884321 | 151884586 | KMT2C | 693_selected_genes |
| chr7  | 151884774 | 151884957 | KMT2C | 693_selected_genes |
| chr7  | 151891068 | 151891238 | KMT2C | 693_selected_genes |
| chr7  | 151891288 | 151891371 | KMT2C | 693_selected_genes |
| chr7  | 151891499 | 151891678 | KMT2C | 693_selected_genes |
| chr7  | 151892966 | 151893121 | KMT2C | 693_selected_genes |
| chr7  | 151896338 | 151896569 | KMT2C | 693_selected_genes |
| chr7  | 151899993 | 151900174 | KMT2C | 693_selected_genes |
| chr7  | 151902165 | 151902335 | KMT2C | 693_selected_genes |
| chr7  | 151904359 | 151904538 | KMT2C | 693_selected_genes |
| chr7  | 151917582 | 151917845 | KMT2C | 693_selected_genes |
| chr7  | 151919060 | 151919176 | KMT2C | 693_selected_genes |
| chr7  | 151919632 | 151919792 | KMT2C | 693_selected_genes |
| chr7  | 151921074 | 151921289 | KMT2C | 693_selected_genes |
| chr7  | 151921494 | 151921726 | KMT2C | 693_selected_genes |
| chr7  | 151926982 | 151927137 | KMT2C | 693_selected_genes |
| chr7  | 151927279 | 151927431 | KMT2C | 693_selected_genes |
| chr7  | 151932876 | 151933043 | KMT2C | 693_selected_genes |
| chr7  | 151935766 | 151935936 | KMT2C | 693_selected_genes |
| chr7  | 151944961 | 151945730 | KMT2C | 693_selected_genes |
| chr7  | 151946935 | 151947063 | KMT2C | 693_selected_genes |
| chr7  | 151947912 | 151948076 | KMT2C | 693_selected_genes |
| chr7  | 151948998 | 151949200 | KMT2C | 693_selected_genes |
| chr7  | 151949605 | 151949825 | KMT2C | 693_selected_genes |
| chr7  | 151960075 | 151960240 | KMT2C | 693_selected_genes |
| chr7  | 151962097 | 151962319 | KMT2C | 693_selected_genes |
| chr7  | 151970764 | 151970977 | KMT2C | 693_selected_genes |
| chr7  | 152007025 | 152007185 | KMT2C | 693_selected_genes |
| chr7  | 152008857 | 152009056 | KMT2C | 693_selected_genes |
| chr7  | 152012197 | 152012448 | KMT2C | 693_selected_genes |
| chr7  | 152027660 | 152027852 | KMT2C | 693_selected_genes |
| chr7  | 152055646 | 152055785 | KMT2C | 693_selected_genes |
| chr7  | 152132685 | 152132896 | KMT2C | 693_selected_genes |
| chr12 | 49415537  | 49415680  | KMT2D | 693_selected_genes |
| chr12 | 49415800  | 49415959  | KMT2D | 693_selected_genes |
| chr12 | 49416037  | 49416161  | KMT2D | 693_selected_genes |
| chr12 | 49416347  | 49416683  | KMT2D | 693_selected_genes |
| chr12 | 49417810  | 49417908  | KMT2D | 693_selected_genes |
| chr12 | 49418335  | 49418516  | KMT2D | 693_selected_genes |
| chr12 | 49418567  | 49418754  | KMT2D | 693_selected_genes |
| chr12 | 49419939  | 49421130  | KMT2D | 693_selected_genes |
| chr12 | 49421560  | 49421738  | KMT2D | 693_selected_genes |
| chr12 | 49421766  | 49421949  | KMT2D | 693_selected_genes |
| chr12 | 49422585  | 49422766  | KMT2D | 693_selected_genes |
| chr12 | 49422818  | 49423044  | KMT2D | 693_selected_genes |
| chr12 | 49423158  | 49423284  | KMT2D | 693_selected_genes |
| chr12 | 49424037  | 49424247  | KMT2D | 693_selected_genes |
| chr12 | 49424358  | 49424576  | KMT2D | 693_selected_genes |
| chr12 | 49424650  | 49424841  | KMT2D | 693_selected_genes |
| chr12 | 49424932  | 49427772  | KMT2D | 693_selected_genes |
| chr12 | 49427824  | 49428107  | KMT2D | 693_selected_genes |
| chr12 | 49428167  | 49428284  | KMT2D | 693_selected_genes |
| chr12 | 49428339  | 49428474  | KMT2D | 693_selected_genes |
| chr12 | 49428569  | 49428743  | KMT2D | 693_selected_genes |
| chr12 | 49430882  | 49432797  | KMT2D | 693_selected_genes |
| chr12 | 49432979  | 49433166  | KMT2D | 693_selected_genes |
| chr12 | 49433192  | 49433425  | KMT2D | 693_selected_genes |
| chr12 | 49433481  | 49435343  | KMT2D | 693_selected_genes |
| chr12 | 49435412  | 49435513  | KMT2D | 693_selected_genes |
| chr12 | 49435674  | 49435798  | KMT2D | 693_selected_genes |
| chr12 | 49435846  | 49436138  | KMT2D | 693_selected_genes |
| chr12 | 49436318  | 49436453  | KMT2D | 693_selected_genes |
| chr12 | 49436498  | 49436686  | KMT2D | 693_selected_genes |
| chr12 | 49436833  | 49436994  | KMT2D | 693_selected_genes |
| chr12 | 49437120  | 49437236  | KMT2D | 693_selected_genes |
| chr12 | 49437392  | 49437590  | KMT2D | 693_selected_genes |
| chr12 | 49437625  | 49437806  | KMT2D | 693_selected_genes |
| chr12 | 49437957  | 49438112  | KMT2D | 693_selected_genes |

|       |           |           |       |                    |
|-------|-----------|-----------|-------|--------------------|
| chr12 | 49438160  | 49438330  | KMT2D | 693_selected_genes |
| chr12 | 49438501  | 49438773  | KMT2D | 693_selected_genes |
| chr12 | 49439677  | 49439775  | KMT2D | 693_selected_genes |
| chr12 | 49439822  | 49439982  | KMT2D | 693_selected_genes |
| chr12 | 49440017  | 49440232  | KMT2D | 693_selected_genes |
| chr12 | 49440366  | 49440598  | KMT2D | 693_selected_genes |
| chr12 | 49441722  | 49441877  | KMT2D | 693_selected_genes |
| chr12 | 49442416  | 49442577  | KMT2D | 693_selected_genes |
| chr12 | 49442862  | 49443026  | KMT2D | 693_selected_genes |
| chr12 | 49443439  | 49444598  | KMT2D | 693_selected_genes |
| chr12 | 49444643  | 49446232  | KMT2D | 693_selected_genes |
| chr12 | 49446321  | 49446517  | KMT2D | 693_selected_genes |
| chr12 | 49446672  | 49446880  | KMT2D | 693_selected_genes |
| chr12 | 49446964  | 49447129  | KMT2D | 693_selected_genes |
| chr12 | 49447233  | 49447449  | KMT2D | 693_selected_genes |
| chr12 | 49447735  | 49447948  | KMT2D | 693_selected_genes |
| chr12 | 49448064  | 49448224  | KMT2D | 693_selected_genes |
| chr12 | 49448285  | 49448559  | KMT2D | 693_selected_genes |
| chr12 | 49448657  | 49448834  | KMT2D | 693_selected_genes |
| chr12 | 49449033  | 49449132  | KMT2D | 693_selected_genes |
| chr12 | 25362703  | 25362870  | KRAS  | 693_selected_genes |
| chr12 | 25368349  | 25368519  | KRAS  | 693_selected_genes |
| chr12 | 25378522  | 25378732  | KRAS  | 693_selected_genes |
| chr12 | 25380142  | 25380371  | KRAS  | 693_selected_genes |
| chr12 | 25388114  | 25388185  | KRAS  | 693_selected_genes |
| chr12 | 25398182  | 25398343  | KRAS  | 693_selected_genes |
| chr6  | 129204365 | 129204527 | LAMA2 | 693_selected_genes |
| chr6  | 129371037 | 129371258 | LAMA2 | 693_selected_genes |
| chr6  | 129380903 | 129381066 | LAMA2 | 693_selected_genes |
| chr6  | 129419292 | 129419585 | LAMA2 | 693_selected_genes |
| chr6  | 129465020 | 129465250 | LAMA2 | 693_selected_genes |
| chr6  | 129468078 | 129468218 | LAMA2 | 693_selected_genes |
| chr6  | 129470098 | 129470266 | LAMA2 | 693_selected_genes |
| chr6  | 129475624 | 129475853 | LAMA2 | 693_selected_genes |
| chr6  | 129486695 | 129486845 | LAMA2 | 693_selected_genes |
| chr6  | 129498825 | 129499036 | LAMA2 | 693_selected_genes |
| chr6  | 129511324 | 129511515 | LAMA2 | 693_selected_genes |
| chr6  | 129513799 | 129514023 | LAMA2 | 693_selected_genes |
| chr6  | 129571231 | 129571383 | LAMA2 | 693_selected_genes |
| chr6  | 129573203 | 129573465 | LAMA2 | 693_selected_genes |
| chr6  | 129581830 | 129581992 | LAMA2 | 693_selected_genes |
| chr6  | 129588225 | 129588389 | LAMA2 | 693_selected_genes |
| chr6  | 129591743 | 129591921 | LAMA2 | 693_selected_genes |
| chr6  | 129601180 | 129601317 | LAMA2 | 693_selected_genes |
| chr6  | 129608966 | 129609228 | LAMA2 | 693_selected_genes |
| chr6  | 129612733 | 129612890 | LAMA2 | 693_selected_genes |
| chr6  | 129618804 | 129619035 | LAMA2 | 693_selected_genes |
| chr6  | 129621855 | 129622042 | LAMA2 | 693_selected_genes |
| chr6  | 129633980 | 129634267 | LAMA2 | 693_selected_genes |
| chr6  | 129635774 | 129635968 | LAMA2 | 693_selected_genes |
| chr6  | 129636595 | 129636825 | LAMA2 | 693_selected_genes |
| chr6  | 129636881 | 129637120 | LAMA2 | 693_selected_genes |
| chr6  | 129637157 | 129637341 | LAMA2 | 693_selected_genes |
| chr6  | 129641657 | 129641825 | LAMA2 | 693_selected_genes |
| chr6  | 129649397 | 129649582 | LAMA2 | 693_selected_genes |
| chr6  | 129663462 | 129663637 | LAMA2 | 693_selected_genes |
| chr6  | 129670417 | 129670554 | LAMA2 | 693_selected_genes |
| chr6  | 129674283 | 129674527 | LAMA2 | 693_selected_genes |
| chr6  | 129687338 | 129687531 | LAMA2 | 693_selected_genes |
| chr6  | 129691011 | 129691160 | LAMA2 | 693_selected_genes |
| chr6  | 129704241 | 129704403 | LAMA2 | 693_selected_genes |
| chr6  | 129712610 | 129712823 | LAMA2 | 693_selected_genes |
| chr6  | 129714164 | 129714425 | LAMA2 | 693_selected_genes |
| chr6  | 129722343 | 129722510 | LAMA2 | 693_selected_genes |
| chr6  | 129723443 | 129723657 | LAMA2 | 693_selected_genes |
| chr6  | 129724940 | 129725129 | LAMA2 | 693_selected_genes |
| chr6  | 129748871 | 129749024 | LAMA2 | 693_selected_genes |
| chr6  | 129759765 | 129759932 | LAMA2 | 693_selected_genes |
| chr6  | 129761935 | 129762168 | LAMA2 | 693_selected_genes |
| chr6  | 129763341 | 129763397 | LAMA2 | 693_selected_genes |
| chr6  | 129764182 | 129764238 | LAMA2 | 693_selected_genes |
| chr6  | 129766786 | 129766991 | LAMA2 | 693_selected_genes |
| chr6  | 129774107 | 129774301 | LAMA2 | 693_selected_genes |
| chr6  | 129775274 | 129775458 | LAMA2 | 693_selected_genes |
| chr6  | 129777454 | 129777664 | LAMA2 | 693_selected_genes |
| chr6  | 129781319 | 129781494 | LAMA2 | 693_selected_genes |
| chr6  | 129785409 | 129785622 | LAMA2 | 693_selected_genes |
| chr6  | 129786264 | 129786459 | LAMA2 | 693_selected_genes |
| chr6  | 129794333 | 129794522 | LAMA2 | 693_selected_genes |
| chr6  | 129796509 | 129796571 | LAMA2 | 693_selected_genes |
| chr6  | 129799812 | 129799983 | LAMA2 | 693_selected_genes |
| chr6  | 129802382 | 129802609 | LAMA2 | 693_selected_genes |
| chr6  | 129807593 | 129807792 | LAMA2 | 693_selected_genes |
| chr6  | 129813020 | 129813247 | LAMA2 | 693_selected_genes |

|       |           |           |       |                    |
|-------|-----------|-----------|-------|--------------------|
| chr6  | 129813434 | 129813653 | LAMA2 | 693_selected_genes |
| chr6  | 129823778 | 129823941 | LAMA2 | 693_selected_genes |
| chr6  | 129824210 | 129824450 | LAMA2 | 693_selected_genes |
| chr6  | 129826319 | 129826525 | LAMA2 | 693_selected_genes |
| chr6  | 129828608 | 129828812 | LAMA2 | 693_selected_genes |
| chr6  | 129833482 | 129833663 | LAMA2 | 693_selected_genes |
| chr6  | 129835492 | 129835765 | LAMA2 | 693_selected_genes |
| chr6  | 129837309 | 129837517 | LAMA2 | 693_selected_genes |
| chr6  | 149982839 | 149983399 | LATS1 | 693_selected_genes |
| chr6  | 149997370 | 149997527 | LATS1 | 693_selected_genes |
| chr6  | 149997665 | 149997898 | LATS1 | 693_selected_genes |
| chr6  | 150000985 | 150001618 | LATS1 | 693_selected_genes |
| chr6  | 150004126 | 150005753 | LATS1 | 693_selected_genes |
| chr6  | 150016184 | 150016382 | LATS1 | 693_selected_genes |
| chr6  | 150018237 | 150018347 | LATS1 | 693_selected_genes |
| chr6  | 150022889 | 150023287 | LATS1 | 693_selected_genes |
| chr6  | 150038959 | 150039195 | LATS1 | 693_selected_genes |
| chr13 | 21548983  | 21549528  | LATS2 | 693_selected_genes |
| chr13 | 21553804  | 21553961  | LATS2 | 693_selected_genes |
| chr13 | 21555579  | 21555812  | LATS2 | 693_selected_genes |
| chr13 | 21557337  | 21557970  | LATS2 | 693_selected_genes |
| chr13 | 21561994  | 21563468  | LATS2 | 693_selected_genes |
| chr13 | 21565385  | 21565568  | LATS2 | 693_selected_genes |
| chr13 | 21619798  | 21620190  | LATS2 | 693_selected_genes |
| chr13 | 46701700  | 46701883  | LCP1  | 693_selected_genes |
| chr13 | 46704923  | 46705098  | LCP1  | 693_selected_genes |
| chr13 | 46708236  | 46708410  | LCP1  | 693_selected_genes |
| chr13 | 46716401  | 46716585  | LCP1  | 693_selected_genes |
| chr13 | 46716835  | 46716960  | LCP1  | 693_selected_genes |
| chr13 | 46717399  | 46717564  | LCP1  | 693_selected_genes |
| chr13 | 46718551  | 46718680  | LCP1  | 693_selected_genes |
| chr13 | 46721017  | 46721263  | LCP1  | 693_selected_genes |
| chr13 | 46722461  | 46722607  | LCP1  | 693_selected_genes |
| chr13 | 46725045  | 46725238  | LCP1  | 693_selected_genes |
| chr13 | 46726889  | 46727105  | LCP1  | 693_selected_genes |
| chr13 | 46728914  | 46729046  | LCP1  | 693_selected_genes |
| chr13 | 46730547  | 46730730  | LCP1  | 693_selected_genes |
| chr13 | 46732631  | 46732811  | LCP1  | 693_selected_genes |
| chr13 | 46732935  | 46733149  | LCP1  | 693_selected_genes |
| chr13 | 46733708  | 46733822  | LCP1  | 693_selected_genes |
| chr19 | 11200199  | 11200316  | LDLR  | 693_selected_genes |
| chr19 | 11201249  | 11201620  | LDLR  | 693_selected_genes |
| chr19 | 11210873  | 11211046  | LDLR  | 693_selected_genes |
| chr19 | 11213314  | 11213487  | LDLR  | 693_selected_genes |
| chr19 | 11215870  | 11216301  | LDLR  | 693_selected_genes |
| chr19 | 11217215  | 11217388  | LDLR  | 693_selected_genes |
| chr19 | 11218042  | 11218215  | LDLR  | 693_selected_genes |
| chr19 | 11221302  | 11221472  | LDLR  | 693_selected_genes |
| chr19 | 11222164  | 11222340  | LDLR  | 693_selected_genes |
| chr19 | 11223928  | 11224150  | LDLR  | 693_selected_genes |
| chr19 | 11224185  | 11224463  | LDLR  | 693_selected_genes |
| chr19 | 11226744  | 11226913  | LDLR  | 693_selected_genes |
| chr19 | 11227509  | 11227699  | LDLR  | 693_selected_genes |
| chr19 | 11230742  | 11230934  | LDLR  | 693_selected_genes |
| chr19 | 11231020  | 11231223  | LDLR  | 693_selected_genes |
| chr19 | 11233824  | 11234045  | LDLR  | 693_selected_genes |
| chr19 | 11238658  | 11238786  | LDLR  | 693_selected_genes |
| chr19 | 11240101  | 11240371  | LDLR  | 693_selected_genes |
| chr19 | 11241931  | 11242219  | LDLR  | 693_selected_genes |
| chr5  | 38481671  | 38482345  | LIFR  | 693_selected_genes |
| chr5  | 38482665  | 38482794  | LIFR  | 693_selected_genes |
| chr5  | 38484851  | 38484995  | LIFR  | 693_selected_genes |
| chr5  | 38485895  | 38486107  | LIFR  | 693_selected_genes |
| chr5  | 38489154  | 38489372  | LIFR  | 693_selected_genes |
| chr5  | 38490266  | 38490418  | LIFR  | 693_selected_genes |
| chr5  | 38493682  | 38493912  | LIFR  | 693_selected_genes |
| chr5  | 38496458  | 38496722  | LIFR  | 693_selected_genes |
| chr5  | 38499589  | 38499710  | LIFR  | 693_selected_genes |
| chr5  | 38502713  | 38502926  | LIFR  | 693_selected_genes |
| chr5  | 38504052  | 38504248  | LIFR  | 693_selected_genes |
| chr5  | 38505981  | 38506201  | LIFR  | 693_selected_genes |
| chr5  | 38506579  | 38506759  | LIFR  | 693_selected_genes |
| chr5  | 38510540  | 38510845  | LIFR  | 693_selected_genes |
| chr5  | 38511866  | 38512091  | LIFR  | 693_selected_genes |
| chr5  | 38523495  | 38523709  | LIFR  | 693_selected_genes |
| chr5  | 38527231  | 38527421  | LIFR  | 693_selected_genes |
| chr5  | 38528802  | 38528967  | LIFR  | 693_selected_genes |
| chr5  | 38530582  | 38530774  | LIFR  | 693_selected_genes |
| chr1  | 156084684 | 156085090 | LMNA  | 693_selected_genes |
| chr1  | 156095969 | 156096039 | LMNA  | 693_selected_genes |
| chr1  | 156096310 | 156096467 | LMNA  | 693_selected_genes |
| chr1  | 156096568 | 156096735 | LMNA  | 693_selected_genes |
| chr1  | 156099615 | 156099724 | LMNA  | 693_selected_genes |
| chr1  | 156100382 | 156100589 | LMNA  | 693_selected_genes |

|       |           |           |       |                    |
|-------|-----------|-----------|-------|--------------------|
| chr1  | 156104168 | 156104344 | LMNA  | 693_selected_genes |
| chr1  | 156104570 | 156104791 | LMNA  | 693_selected_genes |
| chr1  | 156104952 | 156105128 | LMNA  | 693_selected_genes |
| chr1  | 156105666 | 156105937 | LMNA  | 693_selected_genes |
| chr1  | 156105979 | 156106252 | LMNA  | 693_selected_genes |
| chr1  | 156106686 | 156106844 | LMNA  | 693_selected_genes |
| chr1  | 156106878 | 156107048 | LMNA  | 693_selected_genes |
| chr1  | 156107419 | 156107580 | LMNA  | 693_selected_genes |
| chr1  | 156108253 | 156108573 | LMNA  | 693_selected_genes |
| chr1  | 156108845 | 156108922 | LMNA  | 693_selected_genes |
| chr1  | 156109535 | 156109655 | LMNA  | 693_selected_genes |
| chr11 | 8246137   | 8246293   | LMO1  | 693_selected_genes |
| chr11 | 8248496   | 8248672   | LMO1  | 693_selected_genes |
| chr11 | 8251812   | 8252076   | LMO1  | 693_selected_genes |
| chr11 | 8284859   | 8284934   | LMO1  | 693_selected_genes |
| chr11 | 8289948   | 8290020   | LMO1  | 693_selected_genes |
| chr3  | 188123883 | 188124126 | LPP   | 693_selected_genes |
| chr3  | 188202354 | 188202517 | LPP   | 693_selected_genes |
| chr3  | 188242427 | 188242600 | LPP   | 693_selected_genes |
| chr3  | 188326923 | 188327657 | LPP   | 693_selected_genes |
| chr3  | 188426029 | 188426253 | LPP   | 693_selected_genes |
| chr3  | 188464250 | 188464308 | LPP   | 693_selected_genes |
| chr3  | 188477875 | 188478095 | LPP   | 693_selected_genes |
| chr3  | 188583962 | 188584191 | LPP   | 693_selected_genes |
| chr3  | 188590405 | 188590576 | LPP   | 693_selected_genes |
| chr3  | 188592113 | 188592292 | LPP   | 693_selected_genes |
| chr2  | 140990729 | 140990920 | LRP1B | 693_selected_genes |
| chr2  | 140992329 | 140992478 | LRP1B | 693_selected_genes |
| chr2  | 140995695 | 140995890 | LRP1B | 693_selected_genes |
| chr2  | 140996985 | 140997126 | LRP1B | 693_selected_genes |
| chr2  | 141004629 | 141004756 | LRP1B | 693_selected_genes |
| chr2  | 141026811 | 141026975 | LRP1B | 693_selected_genes |
| chr2  | 141027785 | 141027940 | LRP1B | 693_selected_genes |
| chr2  | 141031967 | 141032192 | LRP1B | 693_selected_genes |
| chr2  | 141055351 | 141055563 | LRP1B | 693_selected_genes |
| chr2  | 141072478 | 141072693 | LRP1B | 693_selected_genes |
| chr2  | 141079506 | 141079682 | LRP1B | 693_selected_genes |
| chr2  | 141081436 | 141081660 | LRP1B | 693_selected_genes |
| chr2  | 141083305 | 141083472 | LRP1B | 693_selected_genes |
| chr2  | 141091996 | 141092153 | LRP1B | 693_selected_genes |
| chr2  | 141093158 | 141093432 | LRP1B | 693_selected_genes |
| chr2  | 141108340 | 141108632 | LRP1B | 693_selected_genes |
| chr2  | 141110496 | 141110666 | LRP1B | 693_selected_genes |
| chr2  | 141113885 | 141114070 | LRP1B | 693_selected_genes |
| chr2  | 141115522 | 141115710 | LRP1B | 693_selected_genes |
| chr2  | 141116364 | 141116540 | LRP1B | 693_selected_genes |
| chr2  | 141122204 | 141122377 | LRP1B | 693_selected_genes |
| chr2  | 141128253 | 141128436 | LRP1B | 693_selected_genes |
| chr2  | 141128722 | 141128879 | LRP1B | 693_selected_genes |
| chr2  | 141130551 | 141130731 | LRP1B | 693_selected_genes |
| chr2  | 141135723 | 141135880 | LRP1B | 693_selected_genes |
| chr2  | 141143436 | 141143603 | LRP1B | 693_selected_genes |
| chr2  | 141200047 | 141200217 | LRP1B | 693_selected_genes |
| chr2  | 141201873 | 141202043 | LRP1B | 693_selected_genes |
| chr2  | 141202106 | 141202273 | LRP1B | 693_selected_genes |
| chr2  | 141208111 | 141208255 | LRP1B | 693_selected_genes |
| chr2  | 141213998 | 141214197 | LRP1B | 693_selected_genes |
| chr2  | 141215006 | 141215245 | LRP1B | 693_selected_genes |
| chr2  | 141232681 | 141232931 | LRP1B | 693_selected_genes |
| chr2  | 141242886 | 141243118 | LRP1B | 693_selected_genes |
| chr2  | 141245160 | 141245333 | LRP1B | 693_selected_genes |
| chr2  | 141250151 | 141250287 | LRP1B | 693_selected_genes |
| chr2  | 141253108 | 141253342 | LRP1B | 693_selected_genes |
| chr2  | 141259230 | 141259468 | LRP1B | 693_selected_genes |
| chr2  | 141260506 | 141260697 | LRP1B | 693_selected_genes |
| chr2  | 141264339 | 141264512 | LRP1B | 693_selected_genes |
| chr2  | 141267471 | 141267650 | LRP1B | 693_selected_genes |
| chr2  | 141272196 | 141272366 | LRP1B | 693_selected_genes |
| chr2  | 141274432 | 141274605 | LRP1B | 693_selected_genes |
| chr2  | 141283387 | 141283587 | LRP1B | 693_selected_genes |
| chr2  | 141283780 | 141283944 | LRP1B | 693_selected_genes |
| chr2  | 141291564 | 141291734 | LRP1B | 693_selected_genes |
| chr2  | 141294124 | 141294303 | LRP1B | 693_selected_genes |
| chr2  | 141298516 | 141298692 | LRP1B | 693_selected_genes |
| chr2  | 141299322 | 141299565 | LRP1B | 693_selected_genes |
| chr2  | 141356174 | 141356429 | LRP1B | 693_selected_genes |
| chr2  | 141358993 | 141359233 | LRP1B | 693_selected_genes |
| chr2  | 141457793 | 141458215 | LRP1B | 693_selected_genes |
| chr2  | 141459264 | 141459439 | LRP1B | 693_selected_genes |
| chr2  | 141459684 | 141459886 | LRP1B | 693_selected_genes |
| chr2  | 141459970 | 141460147 | LRP1B | 693_selected_genes |
| chr2  | 141473516 | 141473696 | LRP1B | 693_selected_genes |
| chr2  | 141474225 | 141474410 | LRP1B | 693_selected_genes |
| chr2  | 141526756 | 141526938 | LRP1B | 693_selected_genes |

|       |           |           |       |                    |
|-------|-----------|-----------|-------|--------------------|
| chr2  | 141528424 | 141528600 | LRP1B | 693_selected_genes |
| chr2  | 141533641 | 141533832 | LRP1B | 693_selected_genes |
| chr2  | 141571200 | 141571400 | LRP1B | 693_selected_genes |
| chr2  | 141597534 | 141597679 | LRP1B | 693_selected_genes |
| chr2  | 141598461 | 141598686 | LRP1B | 693_selected_genes |
| chr2  | 141607645 | 141607923 | LRP1B | 693_selected_genes |
| chr2  | 141609195 | 141609377 | LRP1B | 693_selected_genes |
| chr2  | 141625133 | 141625428 | LRP1B | 693_selected_genes |
| chr2  | 141625642 | 141625857 | LRP1B | 693_selected_genes |
| chr2  | 141641360 | 141641615 | LRP1B | 693_selected_genes |
| chr2  | 141643681 | 141643929 | LRP1B | 693_selected_genes |
| chr2  | 141660463 | 141660759 | LRP1B | 693_selected_genes |
| chr2  | 141665420 | 141665671 | LRP1B | 693_selected_genes |
| chr2  | 141680508 | 141680741 | LRP1B | 693_selected_genes |
| chr2  | 141707778 | 141707996 | LRP1B | 693_selected_genes |
| chr2  | 141709403 | 141709534 | LRP1B | 693_selected_genes |
| chr2  | 141739703 | 141739870 | LRP1B | 693_selected_genes |
| chr2  | 141747075 | 141747251 | LRP1B | 693_selected_genes |
| chr2  | 141751538 | 141751729 | LRP1B | 693_selected_genes |
| chr2  | 141762878 | 141763051 | LRP1B | 693_selected_genes |
| chr2  | 141771099 | 141771339 | LRP1B | 693_selected_genes |
| chr2  | 141773239 | 141773509 | LRP1B | 693_selected_genes |
| chr2  | 141777465 | 141777696 | LRP1B | 693_selected_genes |
| chr2  | 141806529 | 141806816 | LRP1B | 693_selected_genes |
| chr2  | 141812659 | 141812853 | LRP1B | 693_selected_genes |
| chr2  | 141816426 | 141816648 | LRP1B | 693_selected_genes |
| chr2  | 141819594 | 141819867 | LRP1B | 693_selected_genes |
| chr2  | 141945964 | 141946177 | LRP1B | 693_selected_genes |
| chr2  | 141986726 | 141987034 | LRP1B | 693_selected_genes |
| chr2  | 142004769 | 142004948 | LRP1B | 693_selected_genes |
| chr2  | 142012065 | 142012235 | LRP1B | 693_selected_genes |
| chr2  | 142237939 | 142238127 | LRP1B | 693_selected_genes |
| chr2  | 142567822 | 142567995 | LRP1B | 693_selected_genes |
| chr2  | 142888191 | 142888323 | LRP1B | 693_selected_genes |
| chr12 | 40618908  | 40619109  | LRRK2 | 693_selected_genes |
| chr12 | 40619331  | 40619467  | LRRK2 | 693_selected_genes |
| chr12 | 40626050  | 40626210  | LRRK2 | 693_selected_genes |
| chr12 | 40629402  | 40629541  | LRRK2 | 693_selected_genes |
| chr12 | 40631745  | 40631930  | LRRK2 | 693_selected_genes |
| chr12 | 40634259  | 40634444  | LRRK2 | 693_selected_genes |
| chr12 | 40637326  | 40637508  | LRRK2 | 693_selected_genes |
| chr12 | 40643602  | 40643772  | LRRK2 | 693_selected_genes |
| chr12 | 40645008  | 40645201  | LRRK2 | 693_selected_genes |
| chr12 | 40645241  | 40645371  | LRRK2 | 693_selected_genes |
| chr12 | 40646686  | 40646843  | LRRK2 | 693_selected_genes |
| chr12 | 40651024  | 40651204  | LRRK2 | 693_selected_genes |
| chr12 | 40653256  | 40653431  | LRRK2 | 693_selected_genes |
| chr12 | 40657565  | 40657728  | LRRK2 | 693_selected_genes |
| chr12 | 40668359  | 40668554  | LRRK2 | 693_selected_genes |
| chr12 | 40668630  | 40668820  | LRRK2 | 693_selected_genes |
| chr12 | 40671664  | 40671843  | LRRK2 | 693_selected_genes |
| chr12 | 40671867  | 40672088  | LRRK2 | 693_selected_genes |
| chr12 | 40677651  | 40677960  | LRRK2 | 693_selected_genes |
| chr12 | 40681127  | 40681366  | LRRK2 | 693_selected_genes |
| chr12 | 40687321  | 40687490  | LRRK2 | 693_selected_genes |
| chr12 | 40688621  | 40688741  | LRRK2 | 693_selected_genes |
| chr12 | 40689203  | 40689471  | LRRK2 | 693_selected_genes |
| chr12 | 40692019  | 40692320  | LRRK2 | 693_selected_genes |
| chr12 | 40692885  | 40693084  | LRRK2 | 693_selected_genes |
| chr12 | 40694589  | 40694722  | LRRK2 | 693_selected_genes |
| chr12 | 40696565  | 40696709  | LRRK2 | 693_selected_genes |
| chr12 | 40697724  | 40698000  | LRRK2 | 693_selected_genes |
| chr12 | 40699561  | 40699793  | LRRK2 | 693_selected_genes |
| chr12 | 40702243  | 40702523  | LRRK2 | 693_selected_genes |
| chr12 | 40702882  | 40703060  | LRRK2 | 693_selected_genes |
| chr12 | 40704207  | 40704476  | LRRK2 | 693_selected_genes |
| chr12 | 40707748  | 40708000  | LRRK2 | 693_selected_genes |
| chr12 | 40708988  | 40709127  | LRRK2 | 693_selected_genes |
| chr12 | 40713764  | 40714002  | LRRK2 | 693_selected_genes |
| chr12 | 40714810  | 40715015  | LRRK2 | 693_selected_genes |
| chr12 | 40715811  | 40716008  | LRRK2 | 693_selected_genes |
| chr12 | 40716095  | 40716337  | LRRK2 | 693_selected_genes |
| chr12 | 40716936  | 40717133  | LRRK2 | 693_selected_genes |
| chr12 | 40722136  | 40722287  | LRRK2 | 693_selected_genes |
| chr12 | 40728743  | 40728984  | LRRK2 | 693_selected_genes |
| chr12 | 40734070  | 40734281  | LRRK2 | 693_selected_genes |
| chr12 | 40740529  | 40740750  | LRRK2 | 693_selected_genes |
| chr12 | 40742185  | 40742336  | LRRK2 | 693_selected_genes |
| chr12 | 40745315  | 40745560  | LRRK2 | 693_selected_genes |
| chr12 | 40748075  | 40748319  | LRRK2 | 693_selected_genes |
| chr12 | 40749891  | 40750014  | LRRK2 | 693_selected_genes |
| chr12 | 40753036  | 40753271  | LRRK2 | 693_selected_genes |
| chr12 | 40757178  | 40757381  | LRRK2 | 693_selected_genes |
| chr12 | 40758618  | 40758877  | LRRK2 | 693_selected_genes |

|       |          |          |        |                    |
|-------|----------|----------|--------|--------------------|
| chr12 | 40760782 | 40760904 | LRRK2  | 693_selected_genes |
| chr12 | 40761420 | 40761592 | LRRK2  | 693_selected_genes |
| chr8  | 56854393 | 56854575 | LYN    | 693_selected_genes |
| chr8  | 56858981 | 56859077 | LYN    | 693_selected_genes |
| chr8  | 56860151 | 56860307 | LYN    | 693_selected_genes |
| chr8  | 56862992 | 56863141 | LYN    | 693_selected_genes |
| chr8  | 56863214 | 56863368 | LYN    | 693_selected_genes |
| chr8  | 56864499 | 56864699 | LYN    | 693_selected_genes |
| chr8  | 56866365 | 56866568 | LYN    | 693_selected_genes |
| chr8  | 56879248 | 56879481 | LYN    | 693_selected_genes |
| chr8  | 56882250 | 56882377 | LYN    | 693_selected_genes |
| chr8  | 56910879 | 56911083 | LYN    | 693_selected_genes |
| chr8  | 56911951 | 56912133 | LYN    | 693_selected_genes |
| chr8  | 56922441 | 56922694 | LYN    | 693_selected_genes |
| chr22 | 21336635 | 21336890 | LZTR1  | 693_selected_genes |
| chr22 | 21337290 | 21337403 | LZTR1  | 693_selected_genes |
| chr22 | 21340104 | 21340211 | LZTR1  | 693_selected_genes |
| chr22 | 21341767 | 21341897 | LZTR1  | 693_selected_genes |
| chr22 | 21342273 | 21342432 | LZTR1  | 693_selected_genes |
| chr22 | 21343052 | 21343186 | LZTR1  | 693_selected_genes |
| chr22 | 21343888 | 21343996 | LZTR1  | 693_selected_genes |
| chr22 | 21344649 | 21344839 | LZTR1  | 693_selected_genes |
| chr22 | 21345891 | 21346143 | LZTR1  | 693_selected_genes |
| chr22 | 21346477 | 21346683 | LZTR1  | 693_selected_genes |
| chr22 | 21347057 | 21347218 | LZTR1  | 693_selected_genes |
| chr22 | 21347925 | 21348068 | LZTR1  | 693_selected_genes |
| chr22 | 21348187 | 21348333 | LZTR1  | 693_selected_genes |
| chr22 | 21348367 | 21348583 | LZTR1  | 693_selected_genes |
| chr22 | 21348821 | 21349041 | LZTR1  | 693_selected_genes |
| chr22 | 21349133 | 21349340 | LZTR1  | 693_selected_genes |
| chr22 | 21349631 | 21349791 | LZTR1  | 693_selected_genes |
| chr22 | 21350009 | 21350186 | LZTR1  | 693_selected_genes |
| chr22 | 21350226 | 21350426 | LZTR1  | 693_selected_genes |
| chr22 | 21350959 | 21351115 | LZTR1  | 693_selected_genes |
| chr22 | 21351149 | 21351451 | LZTR1  | 693_selected_genes |
| chr22 | 21351495 | 21351662 | LZTR1  | 693_selected_genes |
| chr11 | 95712086 | 95713152 | MAML2  | 693_selected_genes |
| chr11 | 95718669 | 95718831 | MAML2  | 693_selected_genes |
| chr11 | 95724658 | 95724912 | MAML2  | 693_selected_genes |
| chr11 | 95825030 | 95826706 | MAML2  | 693_selected_genes |
| chr11 | 96074521 | 96075084 | MAML2  | 693_selected_genes |
| chr15 | 66679660 | 66679790 | MAP2K1 | 693_selected_genes |
| chr15 | 66727339 | 66727600 | MAP2K1 | 693_selected_genes |
| chr15 | 66729058 | 66729255 | MAP2K1 | 693_selected_genes |
| chr15 | 66735592 | 66735720 | MAP2K1 | 693_selected_genes |
| chr15 | 66736968 | 66737070 | MAP2K1 | 693_selected_genes |
| chr15 | 66745816 | 66745906 | MAP2K1 | 693_selected_genes |
| chr15 | 66774067 | 66774242 | MAP2K1 | 693_selected_genes |
| chr15 | 66777302 | 66777554 | MAP2K1 | 693_selected_genes |
| chr15 | 66779540 | 66779655 | MAP2K1 | 693_selected_genes |
| chr15 | 66781527 | 66781639 | MAP2K1 | 693_selected_genes |
| chr15 | 66782030 | 66782126 | MAP2K1 | 693_selected_genes |
| chr15 | 66782814 | 66782978 | MAP2K1 | 693_selected_genes |
| chr19 | 4090570  | 4090731  | MAP2K2 | 693_selected_genes |
| chr19 | 4094425  | 4094521  | MAP2K2 | 693_selected_genes |
| chr19 | 4095360  | 4095472  | MAP2K2 | 693_selected_genes |
| chr19 | 4097251  | 4097366  | MAP2K2 | 693_selected_genes |
| chr19 | 4099173  | 4099437  | MAP2K2 | 693_selected_genes |
| chr19 | 4100991  | 4101166  | MAP2K2 | 693_selected_genes |
| chr19 | 4101201  | 4101303  | MAP2K2 | 693_selected_genes |
| chr19 | 4102348  | 4102476  | MAP2K2 | 693_selected_genes |
| chr19 | 4110481  | 4110678  | MAP2K2 | 693_selected_genes |
| chr19 | 4117391  | 4117652  | MAP2K2 | 693_selected_genes |
| chr19 | 4123755  | 4123897  | MAP2K2 | 693_selected_genes |
| chr17 | 11924178 | 11924343 | MAP2K4 | 693_selected_genes |
| chr17 | 11935557 | 11935640 | MAP2K4 | 693_selected_genes |
| chr17 | 11958180 | 11958333 | MAP2K4 | 693_selected_genes |
| chr17 | 11984647 | 11984872 | MAP2K4 | 693_selected_genes |
| chr17 | 11998866 | 11999036 | MAP2K4 | 693_selected_genes |
| chr17 | 12011081 | 12011251 | MAP2K4 | 693_selected_genes |
| chr17 | 12013666 | 12013768 | MAP2K4 | 693_selected_genes |
| chr17 | 12016524 | 12016702 | MAP2K4 | 693_selected_genes |
| chr17 | 12028585 | 12028713 | MAP2K4 | 693_selected_genes |
| chr17 | 12032430 | 12032629 | MAP2K4 | 693_selected_genes |
| chr17 | 12043130 | 12043226 | MAP2K4 | 693_selected_genes |
| chr17 | 12044438 | 12044602 | MAP2K4 | 693_selected_genes |
| chr19 | 7968804  | 7968978  | MAP2K7 | 693_selected_genes |
| chr19 | 7970667  | 7970765  | MAP2K7 | 693_selected_genes |
| chr19 | 7974614  | 7974806  | MAP2K7 | 693_selected_genes |
| chr19 | 7974922  | 7975283  | MAP2K7 | 693_selected_genes |
| chr19 | 7975312  | 7975482  | MAP2K7 | 693_selected_genes |
| chr19 | 7975555  | 7975713  | MAP2K7 | 693_selected_genes |
| chr19 | 7975839  | 7976069  | MAP2K7 | 693_selected_genes |
| chr19 | 7976109  | 7976240  | MAP2K7 | 693_selected_genes |

|       |           |           |         |                    |
|-------|-----------|-----------|---------|--------------------|
| chr19 | 7976274   | 7976488   | MAP2K7  | 693_selected_genes |
| chr19 | 7977008   | 7977104   | MAP2K7  | 693_selected_genes |
| chr19 | 7977156   | 7977341   | MAP2K7  | 693_selected_genes |
| chr5  | 56111375  | 56111907  | MAP3K1  | 693_selected_genes |
| chr5  | 56152401  | 56152602  | MAP3K1  | 693_selected_genes |
| chr5  | 56155516  | 56155767  | MAP3K1  | 693_selected_genes |
| chr5  | 56160535  | 56160786  | MAP3K1  | 693_selected_genes |
| chr5  | 56161141  | 56161308  | MAP3K1  | 693_selected_genes |
| chr5  | 56161630  | 56161829  | MAP3K1  | 693_selected_genes |
| chr5  | 56167711  | 56167883  | MAP3K1  | 693_selected_genes |
| chr5  | 56168442  | 56168574  | MAP3K1  | 693_selected_genes |
| chr5  | 56168626  | 56168857  | MAP3K1  | 693_selected_genes |
| chr5  | 56170833  | 56171162  | MAP3K1  | 693_selected_genes |
| chr5  | 56174781  | 56174953  | MAP3K1  | 693_selected_genes |
| chr5  | 56176512  | 56176654  | MAP3K1  | 693_selected_genes |
| chr5  | 56176884  | 56177124  | MAP3K1  | 693_selected_genes |
| chr5  | 56177371  | 56178718  | MAP3K1  | 693_selected_genes |
| chr5  | 56179328  | 56179531  | MAP3K1  | 693_selected_genes |
| chr5  | 56180465  | 56180678  | MAP3K1  | 693_selected_genes |
| chr5  | 56181733  | 56181915  | MAP3K1  | 693_selected_genes |
| chr5  | 56183179  | 56183372  | MAP3K1  | 693_selected_genes |
| chr5  | 56184027  | 56184209  | MAP3K1  | 693_selected_genes |
| chr5  | 56189332  | 56189532  | MAP3K1  | 693_selected_genes |
| chr3  | 185003368 | 185003456 | MAP3K13 | 693_selected_genes |
| chr3  | 185009375 | 185009510 | MAP3K13 | 693_selected_genes |
| chr3  | 185046969 | 185047062 | MAP3K13 | 693_selected_genes |
| chr3  | 185146344 | 185146869 | MAP3K13 | 693_selected_genes |
| chr3  | 185155209 | 185155443 | MAP3K13 | 693_selected_genes |
| chr3  | 185161207 | 185161449 | MAP3K13 | 693_selected_genes |
| chr3  | 185165551 | 185165760 | MAP3K13 | 693_selected_genes |
| chr3  | 185167662 | 185167871 | MAP3K13 | 693_selected_genes |
| chr3  | 185169049 | 185169208 | MAP3K13 | 693_selected_genes |
| chr3  | 185181312 | 185181472 | MAP3K13 | 693_selected_genes |
| chr3  | 185183509 | 185183676 | MAP3K13 | 693_selected_genes |
| chr3  | 185184588 | 185184776 | MAP3K13 | 693_selected_genes |
| chr3  | 185190737 | 185191574 | MAP3K13 | 693_selected_genes |
| chr3  | 185195088 | 185195209 | MAP3K13 | 693_selected_genes |
| chr3  | 185197994 | 185198342 | MAP3K13 | 693_selected_genes |
| chr3  | 185200117 | 185200269 | MAP3K13 | 693_selected_genes |
| chr17 | 61700094  | 61700148  | MAP3K3  | 693_selected_genes |
| chr17 | 61710015  | 61710187  | MAP3K3  | 693_selected_genes |
| chr17 | 61712043  | 61712186  | MAP3K3  | 693_selected_genes |
| chr17 | 61723368  | 61723459  | MAP3K3  | 693_selected_genes |
| chr17 | 61729891  | 61730041  | MAP3K3  | 693_selected_genes |
| chr17 | 61735128  | 61735292  | MAP3K3  | 693_selected_genes |
| chr17 | 61744274  | 61744445  | MAP3K3  | 693_selected_genes |
| chr17 | 61745480  | 61745550  | MAP3K3  | 693_selected_genes |
| chr17 | 61759100  | 61759284  | MAP3K3  | 693_selected_genes |
| chr17 | 61762851  | 61762975  | MAP3K3  | 693_selected_genes |
| chr17 | 61765861  | 61765979  | MAP3K3  | 693_selected_genes |
| chr17 | 61766123  | 61766266  | MAP3K3  | 693_selected_genes |
| chr17 | 61766878  | 61767120  | MAP3K3  | 693_selected_genes |
| chr17 | 61767598  | 61767797  | MAP3K3  | 693_selected_genes |
| chr17 | 61768327  | 61768422  | MAP3K3  | 693_selected_genes |
| chr17 | 61768436  | 61768618  | MAP3K3  | 693_selected_genes |
| chr17 | 61769067  | 61769247  | MAP3K3  | 693_selected_genes |
| chr17 | 61769576  | 61769804  | MAP3K3  | 693_selected_genes |
| chr17 | 61770883  | 61771162  | MAP3K3  | 693_selected_genes |
| chr6  | 161412938 | 161413140 | MAP3K4  | 693_selected_genes |
| chr6  | 161455265 | 161455506 | MAP3K4  | 693_selected_genes |
| chr6  | 161469252 | 161469346 | MAP3K4  | 693_selected_genes |
| chr6  | 161469622 | 161471036 | MAP3K4  | 693_selected_genes |
| chr6  | 161488205 | 161488353 | MAP3K4  | 693_selected_genes |
| chr6  | 161491614 | 161491907 | MAP3K4  | 693_selected_genes |
| chr6  | 161494472 | 161494669 | MAP3K4  | 693_selected_genes |
| chr6  | 161501887 | 161502095 | MAP3K4  | 693_selected_genes |
| chr6  | 161505507 | 161505674 | MAP3K4  | 693_selected_genes |
| chr6  | 161507385 | 161507535 | MAP3K4  | 693_selected_genes |
| chr6  | 161507590 | 161507724 | MAP3K4  | 693_selected_genes |
| chr6  | 161508694 | 161509011 | MAP3K4  | 693_selected_genes |
| chr6  | 161510328 | 161510528 | MAP3K4  | 693_selected_genes |
| chr6  | 161512385 | 161512597 | MAP3K4  | 693_selected_genes |
| chr6  | 161513016 | 161513200 | MAP3K4  | 693_selected_genes |
| chr6  | 161513984 | 161514113 | MAP3K4  | 693_selected_genes |
| chr6  | 161514779 | 161514908 | MAP3K4  | 693_selected_genes |
| chr6  | 161518086 | 161518233 | MAP3K4  | 693_selected_genes |
| chr6  | 161519284 | 161519484 | MAP3K4  | 693_selected_genes |
| chr6  | 161522898 | 161523049 | MAP3K4  | 693_selected_genes |
| chr6  | 161523705 | 161523836 | MAP3K4  | 693_selected_genes |
| chr6  | 161527520 | 161527762 | MAP3K4  | 693_selected_genes |
| chr6  | 161528905 | 161529026 | MAP3K4  | 693_selected_genes |
| chr6  | 161529749 | 161529916 | MAP3K4  | 693_selected_genes |
| chr6  | 161529957 | 161530098 | MAP3K4  | 693_selected_genes |
| chr6  | 161530761 | 161530971 | MAP3K4  | 693_selected_genes |

|       |           |           |          |                    |
|-------|-----------|-----------|----------|--------------------|
| chr6  | 161532842 | 161533015 | MAP3K4   | 693_selected_genes |
| chr6  | 161533674 | 161533831 | MAP3K4   | 693_selected_genes |
| chr6  | 161536129 | 161536359 | MAP3K4   | 693_selected_genes |
| chr6  | 161537856 | 161537927 | MAP3K4   | 693_selected_genes |
| chr19 | 39078362  | 39078482  | MAP4K1   | 693_selected_genes |
| chr19 | 39079792  | 39079940  | MAP4K1   | 693_selected_genes |
| chr19 | 39083896  | 39084002  | MAP4K1   | 693_selected_genes |
| chr19 | 39086099  | 39086220  | MAP4K1   | 693_selected_genes |
| chr19 | 39086254  | 39086394  | MAP4K1   | 693_selected_genes |
| chr19 | 39086553  | 39086666  | MAP4K1   | 693_selected_genes |
| chr19 | 39086926  | 39087151  | MAP4K1   | 693_selected_genes |
| chr19 | 39087648  | 39087802  | MAP4K1   | 693_selected_genes |
| chr19 | 39087940  | 39088049  | MAP4K1   | 693_selected_genes |
| chr19 | 39088083  | 39088259  | MAP4K1   | 693_selected_genes |
| chr19 | 39090539  | 39090650  | MAP4K1   | 693_selected_genes |
| chr19 | 39090691  | 39090818  | MAP4K1   | 693_selected_genes |
| chr19 | 39092055  | 39092190  | MAP4K1   | 693_selected_genes |
| chr19 | 39096023  | 39096156  | MAP4K1   | 693_selected_genes |
| chr19 | 39096182  | 39096395  | MAP4K1   | 693_selected_genes |
| chr19 | 39096787  | 39096880  | MAP4K1   | 693_selected_genes |
| chr19 | 39098478  | 39098698  | MAP4K1   | 693_selected_genes |
| chr19 | 39098726  | 39098835  | MAP4K1   | 693_selected_genes |
| chr19 | 39100210  | 39100339  | MAP4K1   | 693_selected_genes |
| chr19 | 39100523  | 39100690  | MAP4K1   | 693_selected_genes |
| chr19 | 39101665  | 39101797  | MAP4K1   | 693_selected_genes |
| chr19 | 39101857  | 39101970  | MAP4K1   | 693_selected_genes |
| chr19 | 39103225  | 39103407  | MAP4K1   | 693_selected_genes |
| chr19 | 39104494  | 39104617  | MAP4K1   | 693_selected_genes |
| chr19 | 39104657  | 39104750  | MAP4K1   | 693_selected_genes |
| chr19 | 39104859  | 39104957  | MAP4K1   | 693_selected_genes |
| chr19 | 39105004  | 39105110  | MAP4K1   | 693_selected_genes |
| chr19 | 39106809  | 39106924  | MAP4K1   | 693_selected_genes |
| chr19 | 39107968  | 39108109  | MAP4K1   | 693_selected_genes |
| chr19 | 39108182  | 39108290  | MAP4K1   | 693_selected_genes |
| chr19 | 39108411  | 39108560  | MAP4K1   | 693_selected_genes |
| chr19 | 39109379  | 39109449  | MAP4K1   | 693_selected_genes |
| chr2  | 39477733  | 39477871  | MAP4K3   | 693_selected_genes |
| chr2  | 39478945  | 39479051  | MAP4K3   | 693_selected_genes |
| chr2  | 39481565  | 39481686  | MAP4K3   | 693_selected_genes |
| chr2  | 39485463  | 39485606  | MAP4K3   | 693_selected_genes |
| chr2  | 39485634  | 39485753  | MAP4K3   | 693_selected_genes |
| chr2  | 39487721  | 39487943  | MAP4K3   | 693_selected_genes |
| chr2  | 39492318  | 39492472  | MAP4K3   | 693_selected_genes |
| chr2  | 39494304  | 39494413  | MAP4K3   | 693_selected_genes |
| chr2  | 39499398  | 39499566  | MAP4K3   | 693_selected_genes |
| chr2  | 39499597  | 39499708  | MAP4K3   | 693_selected_genes |
| chr2  | 39505522  | 39505652  | MAP4K3   | 693_selected_genes |
| chr2  | 39507387  | 39507522  | MAP4K3   | 693_selected_genes |
| chr2  | 39509628  | 39509720  | MAP4K3   | 693_selected_genes |
| chr2  | 39513967  | 39514130  | MAP4K3   | 693_selected_genes |
| chr2  | 39515236  | 39515446  | MAP4K3   | 693_selected_genes |
| chr2  | 39517407  | 39517500  | MAP4K3   | 693_selected_genes |
| chr2  | 39519888  | 39519992  | MAP4K3   | 693_selected_genes |
| chr2  | 39520345  | 39520434  | MAP4K3   | 693_selected_genes |
| chr2  | 39526858  | 39526967  | MAP4K3   | 693_selected_genes |
| chr2  | 39530230  | 39530283  | MAP4K3   | 693_selected_genes |
| chr2  | 39535058  | 39535171  | MAP4K3   | 693_selected_genes |
| chr2  | 39536576  | 39536685  | MAP4K3   | 693_selected_genes |
| chr2  | 39542425  | 39542554  | MAP4K3   | 693_selected_genes |
| chr2  | 39552633  | 39552794  | MAP4K3   | 693_selected_genes |
| chr2  | 39552845  | 39552977  | MAP4K3   | 693_selected_genes |
| chr2  | 39553014  | 39553127  | MAP4K3   | 693_selected_genes |
| chr2  | 39553261  | 39553443  | MAP4K3   | 693_selected_genes |
| chr2  | 39559032  | 39559155  | MAP4K3   | 693_selected_genes |
| chr2  | 39560647  | 39560740  | MAP4K3   | 693_selected_genes |
| chr2  | 39564035  | 39564133  | MAP4K3   | 693_selected_genes |
| chr2  | 39564641  | 39564747  | MAP4K3   | 693_selected_genes |
| chr2  | 39570503  | 39570618  | MAP4K3   | 693_selected_genes |
| chr2  | 39583330  | 39583505  | MAP4K3   | 693_selected_genes |
| chr2  | 39605181  | 39605289  | MAP4K3   | 693_selected_genes |
| chr2  | 39606867  | 39606975  | MAP4K3   | 693_selected_genes |
| chr2  | 39664007  | 39664153  | MAP4K3   | 693_selected_genes |
| chr22 | 22123467  | 22123634  | MAPK1    | 693_selected_genes |
| chr22 | 22127136  | 22127296  | MAPK1    | 693_selected_genes |
| chr22 | 22142520  | 22142702  | MAPK1    | 693_selected_genes |
| chr22 | 22142957  | 22143122  | MAPK1    | 693_selected_genes |
| chr22 | 22153275  | 22153442  | MAPK1    | 693_selected_genes |
| chr22 | 22160113  | 22160353  | MAPK1    | 693_selected_genes |
| chr22 | 22161927  | 22162160  | MAPK1    | 693_selected_genes |
| chr22 | 22221586  | 22221755  | MAPK1    | 693_selected_genes |
| chr11 | 45907346  | 45907497  | MAPK8IP1 | 693_selected_genes |
| chr11 | 45918405  | 45918526  | MAPK8IP1 | 693_selected_genes |
| chr11 | 45919610  | 45919766  | MAPK8IP1 | 693_selected_genes |
| chr11 | 45921663  | 45922028  | MAPK8IP1 | 693_selected_genes |

|       |           |           |          |                    |
|-------|-----------|-----------|----------|--------------------|
| chr11 | 45923505  | 45923637  | MAPK8IP1 | 693_selected_genes |
| chr11 | 45923897  | 45924760  | MAPK8IP1 | 693_selected_genes |
| chr11 | 45924890  | 45925016  | MAPK8IP1 | 693_selected_genes |
| chr11 | 45925514  | 45925737  | MAPK8IP1 | 693_selected_genes |
| chr11 | 45925980  | 45926140  | MAPK8IP1 | 693_selected_genes |
| chr11 | 45926243  | 45926410  | MAPK8IP1 | 693_selected_genes |
| chr11 | 45926496  | 45926617  | MAPK8IP1 | 693_selected_genes |
| chr11 | 45926676  | 45926825  | MAPK8IP1 | 693_selected_genes |
| chr11 | 45927174  | 45927297  | MAPK8IP1 | 693_selected_genes |
| chr14 | 65472896  | 65473027  | MAX      | 693_selected_genes |
| chr14 | 65543143  | 65543406  | MAX      | 693_selected_genes |
| chr14 | 65544036  | 65544171  | MAX      | 693_selected_genes |
| chr14 | 65544255  | 65544386  | MAX      | 693_selected_genes |
| chr14 | 65544495  | 65544779  | MAX      | 693_selected_genes |
| chr14 | 65550872  | 65551042  | MAX      | 693_selected_genes |
| chr14 | 65560400  | 65560558  | MAX      | 693_selected_genes |
| chr14 | 65568238  | 65568315  | MAX      | 693_selected_genes |
| chr14 | 65568996  | 65569082  | MAX      | 693_selected_genes |
| chr18 | 47793932  | 47794058  | MBD1     | 693_selected_genes |
| chr18 | 47795973  | 47796213  | MBD1     | 693_selected_genes |
| chr18 | 47796355  | 47796480  | MBD1     | 693_selected_genes |
| chr18 | 47797845  | 47797935  | MBD1     | 693_selected_genes |
| chr18 | 47799021  | 47799133  | MBD1     | 693_selected_genes |
| chr18 | 47799168  | 47799350  | MBD1     | 693_selected_genes |
| chr18 | 47799678  | 47799866  | MBD1     | 693_selected_genes |
| chr18 | 47799908  | 47800258  | MBD1     | 693_selected_genes |
| chr18 | 47800530  | 47800748  | MBD1     | 693_selected_genes |
| chr18 | 47801321  | 47801440  | MBD1     | 693_selected_genes |
| chr18 | 47801473  | 47801640  | MBD1     | 693_selected_genes |
| chr18 | 47801714  | 47801839  | MBD1     | 693_selected_genes |
| chr18 | 47801944  | 47802123  | MBD1     | 693_selected_genes |
| chr18 | 47802179  | 47802376  | MBD1     | 693_selected_genes |
| chr18 | 47802722  | 47802813  | MBD1     | 693_selected_genes |
| chr18 | 47803006  | 47803139  | MBD1     | 693_selected_genes |
| chr18 | 47803176  | 47803393  | MBD1     | 693_selected_genes |
| chr18 | 47803434  | 47803599  | MBD1     | 693_selected_genes |
| chr18 | 47806227  | 47806412  | MBD1     | 693_selected_genes |
| chr18 | 47807508  | 47807611  | MBD1     | 693_selected_genes |
| chr16 | 89985641  | 89986645  | MC1R     | 693_selected_genes |
| chr16 | 89986972  | 89987221  | MC1R     | 693_selected_genes |
| chr1  | 150549814 | 150549992 | MCL1     | 693_selected_genes |
| chr1  | 150550694 | 150550992 | MCL1     | 693_selected_genes |
| chr1  | 150551293 | 150552031 | MCL1     | 693_selected_genes |
| chr6  | 30668216  | 30668434  | MDC1     | 693_selected_genes |
| chr6  | 30670304  | 30670465  | MDC1     | 693_selected_genes |
| chr6  | 30670503  | 30670679  | MDC1     | 693_selected_genes |
| chr6  | 30670855  | 30671088  | MDC1     | 693_selected_genes |
| chr6  | 30671169  | 30671339  | MDC1     | 693_selected_genes |
| chr6  | 30671372  | 30673900  | MDC1     | 693_selected_genes |
| chr6  | 30675135  | 30675256  | MDC1     | 693_selected_genes |
| chr6  | 30675317  | 30676159  | MDC1     | 693_selected_genes |
| chr6  | 30679163  | 30679306  | MDC1     | 693_selected_genes |
| chr6  | 30679418  | 30679528  | MDC1     | 693_selected_genes |
| chr6  | 30679625  | 30681156  | MDC1     | 693_selected_genes |
| chr6  | 30681399  | 30681519  | MDC1     | 693_selected_genes |
| chr6  | 30681554  | 30681985  | MDC1     | 693_selected_genes |
| chr6  | 30682791  | 30682977  | MDC1     | 693_selected_genes |
| chr12 | 69202232  | 69202296  | MDM2     | 693_selected_genes |
| chr12 | 69202962  | 69203103  | MDM2     | 693_selected_genes |
| chr12 | 69207308  | 69207433  | MDM2     | 693_selected_genes |
| chr12 | 69208357  | 69208464  | MDM2     | 693_selected_genes |
| chr12 | 69209382  | 69209525  | MDM2     | 693_selected_genes |
| chr12 | 69210566  | 69210750  | MDM2     | 693_selected_genes |
| chr12 | 69214079  | 69214179  | MDM2     | 693_selected_genes |
| chr12 | 69218117  | 69218235  | MDM2     | 693_selected_genes |
| chr12 | 69218309  | 69218456  | MDM2     | 693_selected_genes |
| chr12 | 69222525  | 69222736  | MDM2     | 693_selected_genes |
| chr12 | 69229583  | 69229789  | MDM2     | 693_selected_genes |
| chr12 | 69230426  | 69230554  | MDM2     | 693_selected_genes |
| chr12 | 69233028  | 69233654  | MDM2     | 693_selected_genes |
| chr1  | 204494621 | 204494749 | MDM4     | 693_selected_genes |
| chr1  | 204495462 | 204495587 | MDM4     | 693_selected_genes |
| chr1  | 204499786 | 204499970 | MDM4     | 693_selected_genes |
| chr1  | 204501293 | 204501399 | MDM4     | 693_selected_genes |
| chr1  | 204501871 | 204501972 | MDM4     | 693_selected_genes |
| chr1  | 204506020 | 204506072 | MDM4     | 693_selected_genes |
| chr1  | 204506532 | 204506650 | MDM4     | 693_selected_genes |
| chr1  | 204507016 | 204507144 | MDM4     | 693_selected_genes |
| chr1  | 204507311 | 204507461 | MDM4     | 693_selected_genes |
| chr1  | 204511886 | 204512097 | MDM4     | 693_selected_genes |
| chr1  | 204513637 | 204513837 | MDM4     | 693_selected_genes |
| chr1  | 204515899 | 204516030 | MDM4     | 693_selected_genes |
| chr1  | 204518215 | 204518835 | MDM4     | 693_selected_genes |
| chr1  | 204527743 | 204527834 | MDM4     | 693_selected_genes |

|       |           |           |       |                    |
|-------|-----------|-----------|-------|--------------------|
| chr3  | 168802671 | 168802856 | MECOM | 693_selected_genes |
| chr3  | 168804310 | 168804378 | MECOM | 693_selected_genes |
| chr3  | 168806762 | 168806996 | MECOM | 693_selected_genes |
| chr3  | 168807762 | 168808049 | MECOM | 693_selected_genes |
| chr3  | 168810720 | 168810915 | MECOM | 693_selected_genes |
| chr3  | 168812838 | 168813058 | MECOM | 693_selected_genes |
| chr3  | 168818647 | 168818775 | MECOM | 693_selected_genes |
| chr3  | 168819822 | 168820039 | MECOM | 693_selected_genes |
| chr3  | 168825688 | 168825765 | MECOM | 693_selected_genes |
| chr3  | 168830549 | 168830687 | MECOM | 693_selected_genes |
| chr3  | 168833145 | 168834552 | MECOM | 693_selected_genes |
| chr3  | 168838818 | 168839025 | MECOM | 693_selected_genes |
| chr3  | 168840342 | 168840540 | MECOM | 693_selected_genes |
| chr3  | 168845606 | 168845873 | MECOM | 693_selected_genes |
| chr3  | 168849191 | 168849344 | MECOM | 693_selected_genes |
| chr3  | 168861460 | 168861645 | MECOM | 693_selected_genes |
| chr3  | 168862759 | 168862812 | MECOM | 693_selected_genes |
| chr3  | 169098949 | 169099337 | MECOM | 693_selected_genes |
| chr3  | 169283731 | 169283853 | MECOM | 693_selected_genes |
| chr3  | 169381098 | 169381185 | MECOM | 693_selected_genes |
| chr17 | 37561505  | 37561586  | MED1  | 693_selected_genes |
| chr17 | 37563702  | 37566999  | MED1  | 693_selected_genes |
| chr17 | 37571253  | 37571409  | MED1  | 693_selected_genes |
| chr17 | 37571471  | 37571617  | MED1  | 693_selected_genes |
| chr17 | 37575944  | 37576196  | MED1  | 693_selected_genes |
| chr17 | 37579554  | 37579723  | MED1  | 693_selected_genes |
| chr17 | 37579924  | 37580099  | MED1  | 693_selected_genes |
| chr17 | 37580854  | 37581016  | MED1  | 693_selected_genes |
| chr17 | 37583928  | 37584068  | MED1  | 693_selected_genes |
| chr17 | 37587342  | 37587466  | MED1  | 693_selected_genes |
| chr17 | 37588169  | 37588294  | MED1  | 693_selected_genes |
| chr17 | 37590476  | 37590598  | MED1  | 693_selected_genes |
| chr17 | 37595392  | 37595471  | MED1  | 693_selected_genes |
| chr17 | 37596613  | 37596796  | MED1  | 693_selected_genes |
| chr17 | 37596850  | 37596955  | MED1  | 693_selected_genes |
| chr17 | 37599777  | 37599906  | MED1  | 693_selected_genes |
| chr17 | 37601689  | 37601847  | MED1  | 693_selected_genes |
| chr17 | 37604025  | 37604182  | MED1  | 693_selected_genes |
| chr17 | 37607265  | 37607340  | MED1  | 693_selected_genes |
| chrX  | 70338579  | 70338728  | MED12 | 693_selected_genes |
| chrX  | 70339163  | 70339352  | MED12 | 693_selected_genes |
| chrX  | 70339510  | 70339752  | MED12 | 693_selected_genes |
| chrX  | 70339838  | 70340045  | MED12 | 693_selected_genes |
| chrX  | 70340795  | 70341027  | MED12 | 693_selected_genes |
| chrX  | 70341151  | 70341312  | MED12 | 693_selected_genes |
| chrX  | 70341386  | 70341691  | MED12 | 693_selected_genes |
| chrX  | 70342024  | 70342221  | MED12 | 693_selected_genes |
| chrX  | 70342332  | 70342482  | MED12 | 693_selected_genes |
| chrX  | 70342562  | 70342749  | MED12 | 693_selected_genes |
| chrX  | 70342919  | 70343101  | MED12 | 693_selected_genes |
| chrX  | 70343418  | 70343595  | MED12 | 693_selected_genes |
| chrX  | 70343983  | 70344263  | MED12 | 693_selected_genes |
| chrX  | 70344588  | 70344719  | MED12 | 693_selected_genes |
| chrX  | 70344800  | 70345021  | MED12 | 693_selected_genes |
| chrX  | 70345175  | 70345370  | MED12 | 693_selected_genes |
| chrX  | 70345487  | 70345588  | MED12 | 693_selected_genes |
| chrX  | 70345860  | 70346029  | MED12 | 693_selected_genes |
| chrX  | 70346165  | 70346359  | MED12 | 693_selected_genes |
| chrX  | 70346793  | 70347007  | MED12 | 693_selected_genes |
| chrX  | 70347160  | 70347342  | MED12 | 693_selected_genes |
| chrX  | 70347717  | 70347995  | MED12 | 693_selected_genes |
| chrX  | 70348120  | 70348315  | MED12 | 693_selected_genes |
| chrX  | 70348422  | 70348593  | MED12 | 693_selected_genes |
| chrX  | 70348938  | 70349090  | MED12 | 693_selected_genes |
| chrX  | 70349140  | 70349304  | MED12 | 693_selected_genes |
| chrX  | 70349504  | 70349730  | MED12 | 693_selected_genes |
| chrX  | 70349859  | 70350089  | MED12 | 693_selected_genes |
| chrX  | 70351374  | 70351496  | MED12 | 693_selected_genes |
| chrX  | 70351897  | 70352081  | MED12 | 693_selected_genes |
| chrX  | 70352201  | 70352413  | MED12 | 693_selected_genes |
| chrX  | 70352669  | 70352831  | MED12 | 693_selected_genes |
| chrX  | 70352947  | 70353087  | MED12 | 693_selected_genes |
| chrX  | 70354181  | 70354341  | MED12 | 693_selected_genes |
| chrX  | 70354537  | 70354723  | MED12 | 693_selected_genes |
| chrX  | 70354916  | 70355128  | MED12 | 693_selected_genes |
| chrX  | 70356105  | 70356530  | MED12 | 693_selected_genes |
| chrX  | 70356703  | 70356904  | MED12 | 693_selected_genes |
| chrX  | 70357011  | 70357267  | MED12 | 693_selected_genes |
| chrX  | 70357382  | 70357510  | MED12 | 693_selected_genes |
| chrX  | 70357529  | 70357818  | MED12 | 693_selected_genes |
| chrX  | 70360459  | 70360732  | MED12 | 693_selected_genes |
| chrX  | 70361054  | 70361245  | MED12 | 693_selected_genes |
| chrX  | 70361707  | 70361839  | MED12 | 693_selected_genes |
| chrX  | 70361999  | 70362093  | MED12 | 693_selected_genes |

|       |           |           |       |                    |
|-------|-----------|-----------|-------|--------------------|
| chr11 | 93517654  | 93517954  | MED17 | 693_selected_genes |
| chr11 | 93521141  | 93521379  | MED17 | 693_selected_genes |
| chr11 | 93523400  | 93523534  | MED17 | 693_selected_genes |
| chr11 | 93523714  | 93523984  | MED17 | 693_selected_genes |
| chr11 | 93526868  | 93527082  | MED17 | 693_selected_genes |
| chr11 | 93527091  | 93527226  | MED17 | 693_selected_genes |
| chr11 | 93528048  | 93528251  | MED17 | 693_selected_genes |
| chr11 | 93529550  | 93529731  | MED17 | 693_selected_genes |
| chr11 | 93530675  | 93530910  | MED17 | 693_selected_genes |
| chr11 | 93534975  | 93535163  | MED17 | 693_selected_genes |
| chr11 | 93540658  | 93540826  | MED17 | 693_selected_genes |
| chr11 | 93542857  | 93543067  | MED17 | 693_selected_genes |
| chr11 | 93544993  | 93545255  | MED17 | 693_selected_genes |
| chr6  | 131895407 | 131895460 | MED23 | 693_selected_genes |
| chr6  | 131908034 | 131908102 | MED23 | 693_selected_genes |
| chr6  | 131908793 | 131909011 | MED23 | 693_selected_genes |
| chr6  | 131910575 | 131910761 | MED23 | 693_selected_genes |
| chr6  | 131911436 | 131911607 | MED23 | 693_selected_genes |
| chr6  | 131912427 | 131912692 | MED23 | 693_selected_genes |
| chr6  | 131913502 | 131913625 | MED23 | 693_selected_genes |
| chr6  | 131914120 | 131914336 | MED23 | 693_selected_genes |
| chr6  | 131915213 | 131915500 | MED23 | 693_selected_genes |
| chr6  | 131917061 | 131917328 | MED23 | 693_selected_genes |
| chr6  | 131917632 | 131917853 | MED23 | 693_selected_genes |
| chr6  | 131919365 | 131919632 | MED23 | 693_selected_genes |
| chr6  | 131919670 | 131919926 | MED23 | 693_selected_genes |
| chr6  | 131921152 | 131921327 | MED23 | 693_selected_genes |
| chr6  | 131923332 | 131923546 | MED23 | 693_selected_genes |
| chr6  | 131924144 | 131924369 | MED23 | 693_selected_genes |
| chr6  | 131925292 | 131925485 | MED23 | 693_selected_genes |
| chr6  | 131926354 | 131926650 | MED23 | 693_selected_genes |
| chr6  | 131927593 | 131927789 | MED23 | 693_selected_genes |
| chr6  | 131929042 | 131929236 | MED23 | 693_selected_genes |
| chr6  | 131931160 | 131931429 | MED23 | 693_selected_genes |
| chr6  | 131936438 | 131936506 | MED23 | 693_selected_genes |
| chr6  | 131936814 | 131936877 | MED23 | 693_selected_genes |
| chr6  | 131937016 | 131937167 | MED23 | 693_selected_genes |
| chr6  | 131939521 | 131939684 | MED23 | 693_selected_genes |
| chr6  | 131940941 | 131941061 | MED23 | 693_selected_genes |
| chr6  | 131941742 | 131941894 | MED23 | 693_selected_genes |
| chr6  | 131942995 | 131943144 | MED23 | 693_selected_genes |
| chr6  | 131944465 | 131944627 | MED23 | 693_selected_genes |
| chr6  | 131945979 | 131946154 | MED23 | 693_selected_genes |
| chr6  | 131948510 | 131948648 | MED23 | 693_selected_genes |
| chr6  | 131948755 | 131948837 | MED23 | 693_selected_genes |
| chr6  | 131949125 | 131949214 | MED23 | 693_selected_genes |
| chr15 | 100173299 | 100173403 | MEF2A | 693_selected_genes |
| chr15 | 100185740 | 100185994 | MEF2A | 693_selected_genes |
| chr15 | 100211502 | 100211684 | MEF2A | 693_selected_genes |
| chr15 | 100211699 | 100211887 | MEF2A | 693_selected_genes |
| chr15 | 100214572 | 100214842 | MEF2A | 693_selected_genes |
| chr15 | 100215578 | 100215688 | MEF2A | 693_selected_genes |
| chr15 | 100230420 | 100230658 | MEF2A | 693_selected_genes |
| chr15 | 100230745 | 100230810 | MEF2A | 693_selected_genes |
| chr15 | 100230824 | 100230886 | MEF2A | 693_selected_genes |
| chr15 | 100243541 | 100243615 | MEF2A | 693_selected_genes |
| chr15 | 100246908 | 100247085 | MEF2A | 693_selected_genes |
| chr15 | 100250813 | 100250990 | MEF2A | 693_selected_genes |
| chr15 | 100252569 | 100253001 | MEF2A | 693_selected_genes |
| chr19 | 19256477  | 19256856  | MEF2B | 693_selected_genes |
| chr19 | 19257052  | 19257239  | MEF2B | 693_selected_genes |
| chr19 | 19257338  | 19257482  | MEF2B | 693_selected_genes |
| chr19 | 19257525  | 19257709  | MEF2B | 693_selected_genes |
| chr19 | 19257819  | 19258017  | MEF2B | 693_selected_genes |
| chr19 | 19258481  | 19258666  | MEF2B | 693_selected_genes |
| chr19 | 19260000  | 19260263  | MEF2B | 693_selected_genes |
| chr19 | 19261465  | 19261598  | MEF2B | 693_selected_genes |
| chr19 | 19267808  | 19267970  | MEF2B | 693_selected_genes |
| chr11 | 64571780  | 64572313  | MEN1  | 693_selected_genes |
| chr11 | 64572480  | 64572695  | MEN1  | 693_selected_genes |
| chr11 | 64573081  | 64573267  | MEN1  | 693_selected_genes |
| chr11 | 64573678  | 64573865  | MEN1  | 693_selected_genes |
| chr11 | 64574457  | 64574595  | MEN1  | 693_selected_genes |
| chr11 | 64574625  | 64574716  | MEN1  | 693_selected_genes |
| chr11 | 64574998  | 64575177  | MEN1  | 693_selected_genes |
| chr11 | 64575337  | 64575596  | MEN1  | 693_selected_genes |
| chr11 | 64577096  | 64577606  | MEN1  | 693_selected_genes |
| chr7  | 116335785 | 116335878 | MET   | 693_selected_genes |
| chr7  | 116339099 | 116340363 | MET   | 693_selected_genes |
| chr7  | 116371696 | 116371938 | MET   | 693_selected_genes |
| chr7  | 116379978 | 116380163 | MET   | 693_selected_genes |
| chr7  | 116380880 | 116381104 | MET   | 693_selected_genes |
| chr7  | 116395383 | 116395594 | MET   | 693_selected_genes |
| chr7  | 116397465 | 116397618 | MET   | 693_selected_genes |

|       |           |           |      |                    |
|-------|-----------|-----------|------|--------------------|
| chr7  | 116397666 | 116397853 | MET  | 693_selected_genes |
| chr7  | 116398487 | 116398699 | MET  | 693_selected_genes |
| chr7  | 116399365 | 116399569 | MET  | 693_selected_genes |
| chr7  | 116403078 | 116403347 | MET  | 693_selected_genes |
| chr7  | 116409673 | 116409945 | MET  | 693_selected_genes |
| chr7  | 116411526 | 116411733 | MET  | 693_selected_genes |
| chr7  | 116411877 | 116412068 | MET  | 693_selected_genes |
| chr7  | 116414909 | 116415190 | MET  | 693_selected_genes |
| chr7  | 116417417 | 116417548 | MET  | 693_selected_genes |
| chr7  | 116418804 | 116419036 | MET  | 693_selected_genes |
| chr7  | 116422016 | 116422176 | MET  | 693_selected_genes |
| chr7  | 116423332 | 116423548 | MET  | 693_selected_genes |
| chr7  | 116435683 | 116435870 | MET  | 693_selected_genes |
| chr7  | 116435915 | 116436203 | MET  | 693_selected_genes |
| chr15 | 41961067  | 41962181  | MGA  | 693_selected_genes |
| chr15 | 41976566  | 41976632  | MGA  | 693_selected_genes |
| chr15 | 41988247  | 41989246  | MGA  | 693_selected_genes |
| chr15 | 41991035  | 41991164  | MGA  | 693_selected_genes |
| chr15 | 41991236  | 41991382  | MGA  | 693_selected_genes |
| chr15 | 41999900  | 42000082  | MGA  | 693_selected_genes |
| chr15 | 42000276  | 42000431  | MGA  | 693_selected_genes |
| chr15 | 42002863  | 42003572  | MGA  | 693_selected_genes |
| chr15 | 42005323  | 42005719  | MGA  | 693_selected_genes |
| chr15 | 42019352  | 42019629  | MGA  | 693_selected_genes |
| chr15 | 42021336  | 42021572  | MGA  | 693_selected_genes |
| chr15 | 42026694  | 42026817  | MGA  | 693_selected_genes |
| chr15 | 42028353  | 42028921  | MGA  | 693_selected_genes |
| chr15 | 42032078  | 42032426  | MGA  | 693_selected_genes |
| chr15 | 42034718  | 42035395  | MGA  | 693_selected_genes |
| chr15 | 42040809  | 42041150  | MGA  | 693_selected_genes |
| chr15 | 42041283  | 42042838  | MGA  | 693_selected_genes |
| chr15 | 42046609  | 42046790  | MGA  | 693_selected_genes |
| chr15 | 42049960  | 42050062  | MGA  | 693_selected_genes |
| chr15 | 42052495  | 42052752  | MGA  | 693_selected_genes |
| chr15 | 42053911  | 42054073  | MGA  | 693_selected_genes |
| chr15 | 42054301  | 42054585  | MGA  | 693_selected_genes |
| chr15 | 42057058  | 42057285  | MGA  | 693_selected_genes |
| chr15 | 42058176  | 42059503  | MGA  | 693_selected_genes |
| chr3  | 69788723  | 69788877  | MITF | 693_selected_genes |
| chr3  | 69812967  | 69813118  | MITF | 693_selected_genes |
| chr3  | 69915416  | 69915522  | MITF | 693_selected_genes |
| chr3  | 69928230  | 69928559  | MITF | 693_selected_genes |
| chr3  | 69985848  | 69985931  | MITF | 693_selected_genes |
| chr3  | 69986947  | 69987225  | MITF | 693_selected_genes |
| chr3  | 69987477  | 69987542  | MITF | 693_selected_genes |
| chr3  | 69988223  | 69988357  | MITF | 693_selected_genes |
| chr3  | 69990361  | 69990507  | MITF | 693_selected_genes |
| chr3  | 69998176  | 69998344  | MITF | 693_selected_genes |
| chr3  | 70000937  | 70001062  | MITF | 693_selected_genes |
| chr3  | 70005580  | 70005706  | MITF | 693_selected_genes |
| chr3  | 70008398  | 70008596  | MITF | 693_selected_genes |
| chr3  | 70013972  | 70014424  | MITF | 693_selected_genes |
| chr3  | 37035013  | 37035210  | MLH1 | 693_selected_genes |
| chr3  | 37038084  | 37038225  | MLH1 | 693_selected_genes |
| chr3  | 37042420  | 37042569  | MLH1 | 693_selected_genes |
| chr3  | 37045866  | 37045990  | MLH1 | 693_selected_genes |
| chr3  | 37048456  | 37048579  | MLH1 | 693_selected_genes |
| chr3  | 37050279  | 37050421  | MLH1 | 693_selected_genes |
| chr3  | 37053285  | 37053378  | MLH1 | 693_selected_genes |
| chr3  | 37053476  | 37053615  | MLH1 | 693_selected_genes |
| chr3  | 37055897  | 37056060  | MLH1 | 693_selected_genes |
| chr3  | 37058971  | 37059115  | MLH1 | 693_selected_genes |
| chr3  | 37061775  | 37061979  | MLH1 | 693_selected_genes |
| chr3  | 37067102  | 37067523  | MLH1 | 693_selected_genes |
| chr3  | 37070249  | 37070448  | MLH1 | 693_selected_genes |
| chr3  | 37081651  | 37081810  | MLH1 | 693_selected_genes |
| chr3  | 37083733  | 37083847  | MLH1 | 693_selected_genes |
| chr3  | 37088984  | 37089199  | MLH1 | 693_selected_genes |
| chr3  | 37089982  | 37090125  | MLH1 | 693_selected_genes |
| chr3  | 37090369  | 37090533  | MLH1 | 693_selected_genes |
| chr3  | 37091951  | 37092169  | MLH1 | 693_selected_genes |
| chr3  | 37107082  | 37107135  | MLH1 | 693_selected_genes |
| chr14 | 75483759  | 75483929  | MLH3 | 693_selected_genes |
| chr14 | 75485506  | 75485708  | MLH3 | 693_selected_genes |
| chr14 | 75489491  | 75489620  | MLH3 | 693_selected_genes |
| chr14 | 75489672  | 75489746  | MLH3 | 693_selected_genes |
| chr14 | 75497220  | 75497443  | MLH3 | 693_selected_genes |
| chr14 | 75498745  | 75498907  | MLH3 | 693_selected_genes |
| chr14 | 75500096  | 75500218  | MLH3 | 693_selected_genes |
| chr14 | 75503346  | 75503470  | MLH3 | 693_selected_genes |
| chr14 | 75505017  | 75505140  | MLH3 | 693_selected_genes |
| chr14 | 75506588  | 75506743  | MLH3 | 693_selected_genes |
| chr14 | 75508292  | 75508428  | MLH3 | 693_selected_genes |
| chr14 | 75509056  | 75509205  | MLH3 | 693_selected_genes |

|       |           |           |        |                    |
|-------|-----------|-----------|--------|--------------------|
| chr14 | 75513053  | 75516383  | MLH3   | 693_selected_genes |
| chr10 | 21823548  | 21823758  | MLLT10 | 693_selected_genes |
| chr10 | 21827736  | 21827866  | MLLT10 | 693_selected_genes |
| chr10 | 21840719  | 21840875  | MLLT10 | 693_selected_genes |
| chr10 | 21845546  | 21845896  | MLLT10 | 693_selected_genes |
| chr10 | 21875197  | 21875302  | MLLT10 | 693_selected_genes |
| chr10 | 21884234  | 21884394  | MLLT10 | 693_selected_genes |
| chr10 | 21901251  | 21901405  | MLLT10 | 693_selected_genes |
| chr10 | 21903734  | 21903878  | MLLT10 | 693_selected_genes |
| chr10 | 21906015  | 21906161  | MLLT10 | 693_selected_genes |
| chr10 | 21940576  | 21940722  | MLLT10 | 693_selected_genes |
| chr10 | 21959352  | 21959658  | MLLT10 | 693_selected_genes |
| chr10 | 21962253  | 21962873  | MLLT10 | 693_selected_genes |
| chr10 | 21970235  | 21970330  | MLLT10 | 693_selected_genes |
| chr10 | 21971128  | 21971211  | MLLT10 | 693_selected_genes |
| chr10 | 21977394  | 21977492  | MLLT10 | 693_selected_genes |
| chr10 | 22002675  | 22002904  | MLLT10 | 693_selected_genes |
| chr10 | 22015147  | 22015309  | MLLT10 | 693_selected_genes |
| chr10 | 22016759  | 22016882  | MLLT10 | 693_selected_genes |
| chr10 | 22019803  | 22020008  | MLLT10 | 693_selected_genes |
| chr10 | 22021802  | 22022041  | MLLT10 | 693_selected_genes |
| chr10 | 22022407  | 22022546  | MLLT10 | 693_selected_genes |
| chr10 | 22022671  | 22023083  | MLLT10 | 693_selected_genes |
| chr10 | 22024042  | 22024189  | MLLT10 | 693_selected_genes |
| chr10 | 22028933  | 22029190  | MLLT10 | 693_selected_genes |
| chr10 | 22030842  | 22030937  | MLLT10 | 693_selected_genes |
| chr9  | 20346415  | 20346597  | MLLT3  | 693_selected_genes |
| chr9  | 20353497  | 20353619  | MLLT3  | 693_selected_genes |
| chr9  | 20354780  | 20354902  | MLLT3  | 693_selected_genes |
| chr9  | 20360714  | 20360864  | MLLT3  | 693_selected_genes |
| chr9  | 20363448  | 20363628  | MLLT3  | 693_selected_genes |
| chr9  | 20365641  | 20365767  | MLLT3  | 693_selected_genes |
| chr9  | 20413693  | 20414448  | MLLT3  | 693_selected_genes |
| chr9  | 20448095  | 20448289  | MLLT3  | 693_selected_genes |
| chr9  | 20456676  | 20456809  | MLLT3  | 693_selected_genes |
| chr9  | 20620627  | 20620858  | MLLT3  | 693_selected_genes |
| chr9  | 20621746  | 20621799  | MLLT3  | 693_selected_genes |
| chr9  | 20622218  | 20622280  | MLLT3  | 693_selected_genes |
| chr16 | 55513366  | 55513569  | MMP2   | 693_selected_genes |
| chr16 | 55515762  | 55515815  | MMP2   | 693_selected_genes |
| chr16 | 55516795  | 55517072  | MMP2   | 693_selected_genes |
| chr16 | 55517902  | 55518101  | MMP2   | 693_selected_genes |
| chr16 | 55519185  | 55519364  | MMP2   | 693_selected_genes |
| chr16 | 55519490  | 55519714  | MMP2   | 693_selected_genes |
| chr16 | 55522429  | 55522653  | MMP2   | 693_selected_genes |
| chr16 | 55523537  | 55523761  | MMP2   | 693_selected_genes |
| chr16 | 55525687  | 55525893  | MMP2   | 693_selected_genes |
| chr16 | 55527044  | 55527230  | MMP2   | 693_selected_genes |
| chr16 | 55530812  | 55530999  | MMP2   | 693_selected_genes |
| chr16 | 55532175  | 55532385  | MMP2   | 693_selected_genes |
| chr16 | 55536665  | 55536826  | MMP2   | 693_selected_genes |
| chr16 | 55539225  | 55539379  | MMP2   | 693_selected_genes |
| chr22 | 28146877  | 28147109  | MN1    | 693_selected_genes |
| chr22 | 28192725  | 28196556  | MN1    | 693_selected_genes |
| chr1  | 158811918 | 158812233 | MNDA   | 693_selected_genes |
| chr1  | 158813043 | 158813230 | MNDA   | 693_selected_genes |
| chr1  | 158813719 | 158813937 | MNDA   | 693_selected_genes |
| chr1  | 158815351 | 158815818 | MNDA   | 693_selected_genes |
| chr1  | 158817492 | 158817731 | MNDA   | 693_selected_genes |
| chr1  | 158818954 | 158819052 | MNDA   | 693_selected_genes |
| chr1  | 43803494  | 43803623  | MPL    | 693_selected_genes |
| chr1  | 43803744  | 43803927  | MPL    | 693_selected_genes |
| chr1  | 43804187  | 43804416  | MPL    | 693_selected_genes |
| chr1  | 43804916  | 43805265  | MPL    | 693_selected_genes |
| chr1  | 43805609  | 43805822  | MPL    | 693_selected_genes |
| chr1  | 43806032  | 43806209  | MPL    | 693_selected_genes |
| chr1  | 43812090  | 43812325  | MPL    | 693_selected_genes |
| chr1  | 43812437  | 43812630  | MPL    | 693_selected_genes |
| chr1  | 43814488  | 43814698  | MPL    | 693_selected_genes |
| chr1  | 43814908  | 43815140  | MPL    | 693_selected_genes |
| chr1  | 43817861  | 43817999  | MPL    | 693_selected_genes |
| chr1  | 43818163  | 43818468  | MPL    | 693_selected_genes |
| chr17 | 56347991  | 56348249  | MPO    | 693_selected_genes |
| chr17 | 56348990  | 56349278  | MPO    | 693_selected_genes |
| chr17 | 56350083  | 56350304  | MPO    | 693_selected_genes |
| chr17 | 56350749  | 56351055  | MPO    | 693_selected_genes |
| chr17 | 56352877  | 56353088  | MPO    | 693_selected_genes |
| chr17 | 56355162  | 56355531  | MPO    | 693_selected_genes |
| chr17 | 56356343  | 56356600  | MPO    | 693_selected_genes |
| chr17 | 56356632  | 56357032  | MPO    | 693_selected_genes |
| chr17 | 56357174  | 56357400  | MPO    | 693_selected_genes |
| chr17 | 56357701  | 56357845  | MPO    | 693_selected_genes |
| chr17 | 56357940  | 56358144  | MPO    | 693_selected_genes |
| chr11 | 94153265  | 94153372  | MRE11A | 693_selected_genes |

|       |          |          |        |                    |
|-------|----------|----------|--------|--------------------|
| chr11 | 94163051 | 94163177 | MRE11A | 693_selected_genes |
| chr11 | 94168972 | 94169090 | MRE11A | 693_selected_genes |
| chr11 | 94170317 | 94170426 | MRE11A | 693_selected_genes |
| chr11 | 94178950 | 94179084 | MRE11A | 693_selected_genes |
| chr11 | 94180359 | 94180629 | MRE11A | 693_selected_genes |
| chr11 | 94189416 | 94189529 | MRE11A | 693_selected_genes |
| chr11 | 94192548 | 94192772 | MRE11A | 693_selected_genes |
| chr11 | 94194076 | 94194227 | MRE11A | 693_selected_genes |
| chr11 | 94197253 | 94197430 | MRE11A | 693_selected_genes |
| chr11 | 94200953 | 94201084 | MRE11A | 693_selected_genes |
| chr11 | 94203611 | 94203833 | MRE11A | 693_selected_genes |
| chr11 | 94204714 | 94204950 | MRE11A | 693_selected_genes |
| chr11 | 94208753 | 94208810 | MRE11A | 693_selected_genes |
| chr11 | 94209429 | 94209594 | MRE11A | 693_selected_genes |
| chr11 | 94211875 | 94212067 | MRE11A | 693_selected_genes |
| chr11 | 94212814 | 94212952 | MRE11A | 693_selected_genes |
| chr11 | 94219064 | 94219275 | MRE11A | 693_selected_genes |
| chr11 | 94223973 | 94224156 | MRE11A | 693_selected_genes |
| chr11 | 94225782 | 94225861 | MRE11A | 693_selected_genes |
| chr11 | 94225922 | 94225992 | MRE11A | 693_selected_genes |
| chr2  | 47630305 | 47630566 | MSH2   | 693_selected_genes |
| chr2  | 47635514 | 47635719 | MSH2   | 693_selected_genes |
| chr2  | 47637207 | 47637536 | MSH2   | 693_selected_genes |
| chr2  | 47639527 | 47639724 | MSH2   | 693_selected_genes |
| chr2  | 47641382 | 47641582 | MSH2   | 693_selected_genes |
| chr2  | 47643409 | 47643593 | MSH2   | 693_selected_genes |
| chr2  | 47656855 | 47657105 | MSH2   | 693_selected_genes |
| chr2  | 47672661 | 47672821 | MSH2   | 693_selected_genes |
| chr2  | 47690144 | 47690318 | MSH2   | 693_selected_genes |
| chr2  | 47693771 | 47693972 | MSH2   | 693_selected_genes |
| chr2  | 47698078 | 47698226 | MSH2   | 693_selected_genes |
| chr2  | 47702138 | 47702434 | MSH2   | 693_selected_genes |
| chr2  | 47703480 | 47703735 | MSH2   | 693_selected_genes |
| chr2  | 47705385 | 47705683 | MSH2   | 693_selected_genes |
| chr2  | 47707809 | 47708035 | MSH2   | 693_selected_genes |
| chr2  | 47709892 | 47710113 | MSH2   | 693_selected_genes |
| chr2  | 47739416 | 47739598 | MSH2   | 693_selected_genes |
| chr2  | 48010347 | 48010657 | MSH6   | 693_selected_genes |
| chr2  | 48018040 | 48018287 | MSH6   | 693_selected_genes |
| chr2  | 48023007 | 48023227 | MSH6   | 693_selected_genes |
| chr2  | 48025724 | 48028319 | MSH6   | 693_selected_genes |
| chr2  | 48030533 | 48030849 | MSH6   | 693_selected_genes |
| chr2  | 48032023 | 48032191 | MSH6   | 693_selected_genes |
| chr2  | 48032731 | 48032871 | MSH6   | 693_selected_genes |
| chr2  | 48033317 | 48033522 | MSH6   | 693_selected_genes |
| chr2  | 48033565 | 48033815 | MSH6   | 693_selected_genes |
| chr2  | 48033892 | 48034024 | MSH6   | 693_selected_genes |
| chr1  | 11850711 | 11850980 | MTHFR  | 693_selected_genes |
| chr1  | 11851238 | 11851408 | MTHFR  | 693_selected_genes |
| chr1  | 11852309 | 11852461 | MTHFR  | 693_selected_genes |
| chr1  | 11853938 | 11854171 | MTHFR  | 693_selected_genes |
| chr1  | 11854389 | 11854620 | MTHFR  | 693_selected_genes |
| chr1  | 11854760 | 11854945 | MTHFR  | 693_selected_genes |
| chr1  | 11855129 | 11855430 | MTHFR  | 693_selected_genes |
| chr1  | 11856237 | 11856481 | MTHFR  | 693_selected_genes |
| chr1  | 11860243 | 11860404 | MTHFR  | 693_selected_genes |
| chr1  | 11861192 | 11861481 | MTHFR  | 693_selected_genes |
| chr1  | 11862912 | 11863267 | MTHFR  | 693_selected_genes |
| chr1  | 11863436 | 11863596 | MTHFR  | 693_selected_genes |
| chr1  | 11167516 | 11167582 | MTOR   | 693_selected_genes |
| chr1  | 11168212 | 11168368 | MTOR   | 693_selected_genes |
| chr1  | 11169321 | 11169452 | MTOR   | 693_selected_genes |
| chr1  | 11169680 | 11169811 | MTOR   | 693_selected_genes |
| chr1  | 11172883 | 11172999 | MTOR   | 693_selected_genes |
| chr1  | 11174349 | 11174535 | MTOR   | 693_selected_genes |
| chr1  | 11174844 | 11174969 | MTOR   | 693_selected_genes |
| chr1  | 11175427 | 11175550 | MTOR   | 693_selected_genes |
| chr1  | 11177035 | 11177168 | MTOR   | 693_selected_genes |
| chr1  | 11181277 | 11181450 | MTOR   | 693_selected_genes |
| chr1  | 11182010 | 11182208 | MTOR   | 693_selected_genes |
| chr1  | 11184529 | 11184715 | MTOR   | 693_selected_genes |
| chr1  | 11186653 | 11186878 | MTOR   | 693_selected_genes |
| chr1  | 11187041 | 11187226 | MTOR   | 693_selected_genes |
| chr1  | 11187655 | 11187888 | MTOR   | 693_selected_genes |
| chr1  | 11188035 | 11188208 | MTOR   | 693_selected_genes |
| chr1  | 11188485 | 11188634 | MTOR   | 693_selected_genes |
| chr1  | 11188886 | 11189033 | MTOR   | 693_selected_genes |
| chr1  | 11189769 | 11189920 | MTOR   | 693_selected_genes |
| chr1  | 11190560 | 11190859 | MTOR   | 693_selected_genes |
| chr1  | 11193111 | 11193279 | MTOR   | 693_selected_genes |
| chr1  | 11194382 | 11194548 | MTOR   | 693_selected_genes |
| chr1  | 11199335 | 11199517 | MTOR   | 693_selected_genes |
| chr1  | 11199564 | 11199740 | MTOR   | 693_selected_genes |
| chr1  | 11204679 | 11204837 | MTOR   | 693_selected_genes |

|       |           |           |        |                    |
|-------|-----------|-----------|--------|--------------------|
| chr1  | 11204999  | 11205127  | MTOR   | 693_selected_genes |
| chr1  | 11206707  | 11206873  | MTOR   | 693_selected_genes |
| chr1  | 11210157  | 11210308  | MTOR   | 693_selected_genes |
| chr1  | 11217183  | 11217373  | MTOR   | 693_selected_genes |
| chr1  | 11227473  | 11227599  | MTOR   | 693_selected_genes |
| chr1  | 11259289  | 11259485  | MTOR   | 693_selected_genes |
| chr1  | 11259572  | 11259785  | MTOR   | 693_selected_genes |
| chr1  | 11264592  | 11264785  | MTOR   | 693_selected_genes |
| chr1  | 11269343  | 11269540  | MTOR   | 693_selected_genes |
| chr1  | 11270845  | 11270988  | MTOR   | 693_selected_genes |
| chr1  | 11272343  | 11272556  | MTOR   | 693_selected_genes |
| chr1  | 11272827  | 11272990  | MTOR   | 693_selected_genes |
| chr1  | 11273430  | 11273648  | MTOR   | 693_selected_genes |
| chr1  | 11276179  | 11276316  | MTOR   | 693_selected_genes |
| chr1  | 11288699  | 11289000  | MTOR   | 693_selected_genes |
| chr1  | 11290956  | 11291136  | MTOR   | 693_selected_genes |
| chr1  | 11291331  | 11291516  | MTOR   | 693_selected_genes |
| chr1  | 11292467  | 11292610  | MTOR   | 693_selected_genes |
| chr1  | 11293429  | 11293569  | MTOR   | 693_selected_genes |
| chr1  | 11294174  | 11294347  | MTOR   | 693_selected_genes |
| chr1  | 11297874  | 11298130  | MTOR   | 693_selected_genes |
| chr1  | 11298433  | 11298699  | MTOR   | 693_selected_genes |
| chr1  | 11300334  | 11300629  | MTOR   | 693_selected_genes |
| chr1  | 11301584  | 11301763  | MTOR   | 693_selected_genes |
| chr1  | 11303145  | 11303382  | MTOR   | 693_selected_genes |
| chr1  | 11307656  | 11307815  | MTOR   | 693_selected_genes |
| chr1  | 11307850  | 11308176  | MTOR   | 693_selected_genes |
| chr1  | 11313870  | 11314055  | MTOR   | 693_selected_genes |
| chr1  | 11316023  | 11316274  | MTOR   | 693_selected_genes |
| chr1  | 11316964  | 11317247  | MTOR   | 693_selected_genes |
| chr1  | 11318516  | 11318675  | MTOR   | 693_selected_genes |
| chr1  | 11319279  | 11319491  | MTOR   | 693_selected_genes |
| chr1  | 45794952  | 45795134  | MUTYH  | 693_selected_genes |
| chr1  | 45795712  | 45795765  | MUTYH  | 693_selected_genes |
| chr1  | 45796162  | 45796254  | MUTYH  | 693_selected_genes |
| chr1  | 45796828  | 45797031  | MUTYH  | 693_selected_genes |
| chr1  | 45797066  | 45797253  | MUTYH  | 693_selected_genes |
| chr1  | 45797307  | 45797569  | MUTYH  | 693_selected_genes |
| chr1  | 45797669  | 45797783  | MUTYH  | 693_selected_genes |
| chr1  | 45797812  | 45798007  | MUTYH  | 693_selected_genes |
| chr1  | 45798037  | 45798185  | MUTYH  | 693_selected_genes |
| chr1  | 45798220  | 45798384  | MUTYH  | 693_selected_genes |
| chr1  | 45798409  | 45798531  | MUTYH  | 693_selected_genes |
| chr1  | 45798564  | 45798656  | MUTYH  | 693_selected_genes |
| chr1  | 45798743  | 45798867  | MUTYH  | 693_selected_genes |
| chr1  | 45798931  | 45799021  | MUTYH  | 693_selected_genes |
| chr1  | 45799059  | 45799300  | MUTYH  | 693_selected_genes |
| chr1  | 45800037  | 45800208  | MUTYH  | 693_selected_genes |
| chr1  | 45803832  | 45803894  | MUTYH  | 693_selected_genes |
| chr1  | 45805545  | 45805651  | MUTYH  | 693_selected_genes |
| chr1  | 45805849  | 45805951  | MUTYH  | 693_selected_genes |
| chr6  | 135502626 | 135502699 | MYB    | 693_selected_genes |
| chr6  | 135507015 | 135507183 | MYB    | 693_selected_genes |
| chr6  | 135508944 | 135509068 | MYB    | 693_selected_genes |
| chr6  | 135510903 | 135511046 | MYB    | 693_selected_genes |
| chr6  | 135511239 | 135511510 | MYB    | 693_selected_genes |
| chr6  | 135513436 | 135513721 | MYB    | 693_selected_genes |
| chr6  | 135514950 | 135515081 | MYB    | 693_selected_genes |
| chr6  | 135515468 | 135515647 | MYB    | 693_selected_genes |
| chr6  | 135516072 | 135516227 | MYB    | 693_selected_genes |
| chr6  | 135516860 | 135517165 | MYB    | 693_selected_genes |
| chr6  | 135517838 | 135517937 | MYB    | 693_selected_genes |
| chr6  | 135518073 | 135518486 | MYB    | 693_selected_genes |
| chr6  | 135520020 | 135520213 | MYB    | 693_selected_genes |
| chr6  | 135520638 | 135520692 | MYB    | 693_selected_genes |
| chr6  | 135521197 | 135521362 | MYB    | 693_selected_genes |
| chr6  | 135521402 | 135521737 | MYB    | 693_selected_genes |
| chr6  | 135522751 | 135522912 | MYB    | 693_selected_genes |
| chr6  | 135523526 | 135523832 | MYB    | 693_selected_genes |
| chr6  | 135524060 | 135524112 | MYB    | 693_selected_genes |
| chr6  | 135524329 | 135524517 | MYB    | 693_selected_genes |
| chr6  | 135538976 | 135539143 | MYB    | 693_selected_genes |
| chr11 | 47353396  | 47353457  | MYBPC3 | 693_selected_genes |
| chr11 | 47353597  | 47353834  | MYBPC3 | 693_selected_genes |
| chr11 | 47354091  | 47354278  | MYBPC3 | 693_selected_genes |
| chr11 | 47354339  | 47354549  | MYBPC3 | 693_selected_genes |
| chr11 | 47354719  | 47354909  | MYBPC3 | 693_selected_genes |
| chr11 | 47355082  | 47355328  | MYBPC3 | 693_selected_genes |
| chr11 | 47355447  | 47355586  | MYBPC3 | 693_selected_genes |
| chr11 | 47356567  | 47356785  | MYBPC3 | 693_selected_genes |
| chr11 | 47357402  | 47357587  | MYBPC3 | 693_selected_genes |
| chr11 | 47358916  | 47359155  | MYBPC3 | 693_selected_genes |
| chr11 | 47359215  | 47359370  | MYBPC3 | 693_selected_genes |
| chr11 | 47360045  | 47360255  | MYBPC3 | 693_selected_genes |

|       |           |           |        |                    |
|-------|-----------|-----------|--------|--------------------|
| chr11 | 47360849  | 47360980  | MYBPC3 | 693_selected_genes |
| chr11 | 47361176  | 47361366  | MYBPC3 | 693_selected_genes |
| chr11 | 47362528  | 47362608  | MYBPC3 | 693_selected_genes |
| chr11 | 47362663  | 47362820  | MYBPC3 | 693_selected_genes |
| chr11 | 47363516  | 47363732  | MYBPC3 | 693_selected_genes |
| chr11 | 47364103  | 47364320  | MYBPC3 | 693_selected_genes |
| chr11 | 47364355  | 47364511  | MYBPC3 | 693_selected_genes |
| chr11 | 47364546  | 47364724  | MYBPC3 | 693_selected_genes |
| chr11 | 47364785  | 47364838  | MYBPC3 | 693_selected_genes |
| chr11 | 47365017  | 47365200  | MYBPC3 | 693_selected_genes |
| chr11 | 47367732  | 47367946  | MYBPC3 | 693_selected_genes |
| chr11 | 47368152  | 47368223  | MYBPC3 | 693_selected_genes |
| chr11 | 47368552  | 47368605  | MYBPC3 | 693_selected_genes |
| chr11 | 47368947  | 47369055  | MYBPC3 | 693_selected_genes |
| chr11 | 47369176  | 47369256  | MYBPC3 | 693_selected_genes |
| chr11 | 47369382  | 47369481  | MYBPC3 | 693_selected_genes |
| chr11 | 47369949  | 47370117  | MYBPC3 | 693_selected_genes |
| chr11 | 47371299  | 47371498  | MYBPC3 | 693_selected_genes |
| chr11 | 47371539  | 47371688  | MYBPC3 | 693_selected_genes |
| chr11 | 47372027  | 47372191  | MYBPC3 | 693_selected_genes |
| chr11 | 47372764  | 47373081  | MYBPC3 | 693_selected_genes |
| chr11 | 47374148  | 47374223  | MYBPC3 | 693_selected_genes |
| chr8  | 128748814 | 128748894 | MYC    | 693_selected_genes |
| chr8  | 128750468 | 128751290 | MYC    | 693_selected_genes |
| chr8  | 128752616 | 128753229 | MYC    | 693_selected_genes |
| chr1  | 40363018  | 40363667  | MYCL   | 693_selected_genes |
| chr1  | 40366460  | 40367140  | MYCL   | 693_selected_genes |
| chr1  | 40367454  | 40367585  | MYCL   | 693_selected_genes |
| chr2  | 16080683  | 16080890  | MYCN   | 693_selected_genes |
| chr2  | 16082044  | 16083001  | MYCN   | 693_selected_genes |
| chr2  | 16085589  | 16086244  | MYCN   | 693_selected_genes |
| chr3  | 38180127  | 38180544  | MYD88  | 693_selected_genes |
| chr3  | 38181329  | 38181514  | MYD88  | 693_selected_genes |
| chr3  | 38181853  | 38182108  | MYD88  | 693_selected_genes |
| chr3  | 38182222  | 38182364  | MYD88  | 693_selected_genes |
| chr3  | 38182597  | 38182802  | MYD88  | 693_selected_genes |
| chr14 | 23882037  | 23882105  | MYH7   | 693_selected_genes |
| chr14 | 23882942  | 23883127  | MYH7   | 693_selected_genes |
| chr14 | 23883190  | 23883336  | MYH7   | 693_selected_genes |
| chr14 | 23884178  | 23884504  | MYH7   | 693_selected_genes |
| chr14 | 23884564  | 23884740  | MYH7   | 693_selected_genes |
| chr14 | 23884812  | 23885066  | MYH7   | 693_selected_genes |
| chr14 | 23885187  | 23885546  | MYH7   | 693_selected_genes |
| chr14 | 23886051  | 23886226  | MYH7   | 693_selected_genes |
| chr14 | 23886336  | 23886552  | MYH7   | 693_selected_genes |
| chr14 | 23886686  | 23886920  | MYH7   | 693_selected_genes |
| chr14 | 23887393  | 23887640  | MYH7   | 693_selected_genes |
| chr14 | 23888360  | 23888529  | MYH7   | 693_selected_genes |
| chr14 | 23888666  | 23888843  | MYH7   | 693_selected_genes |
| chr14 | 23889028  | 23889468  | MYH7   | 693_selected_genes |
| chr14 | 23890141  | 23890282  | MYH7   | 693_selected_genes |
| chr14 | 23891363  | 23891559  | MYH7   | 693_selected_genes |
| chr14 | 23892730  | 23892957  | MYH7   | 693_selected_genes |
| chr14 | 23893090  | 23893383  | MYH7   | 693_selected_genes |
| chr14 | 23893952  | 23894258  | MYH7   | 693_selected_genes |
| chr14 | 23894465  | 23894652  | MYH7   | 693_selected_genes |
| chr14 | 23894878  | 23895052  | MYH7   | 693_selected_genes |
| chr14 | 23895147  | 23895315  | MYH7   | 693_selected_genes |
| chr14 | 23895960  | 23896098  | MYH7   | 693_selected_genes |
| chr14 | 23896423  | 23896541  | MYH7   | 693_selected_genes |
| chr14 | 23896768  | 23897128  | MYH7   | 693_selected_genes |
| chr14 | 23897683  | 23897904  | MYH7   | 693_selected_genes |
| chr14 | 23898138  | 23898338  | MYH7   | 693_selected_genes |
| chr14 | 23898412  | 23898581  | MYH7   | 693_selected_genes |
| chr14 | 23898958  | 23899147  | MYH7   | 693_selected_genes |
| chr14 | 23899743  | 23899897  | MYH7   | 693_selected_genes |
| chr14 | 23900084  | 23900233  | MYH7   | 693_selected_genes |
| chr14 | 23900601  | 23900715  | MYH7   | 693_selected_genes |
| chr14 | 23900768  | 23900911  | MYH7   | 693_selected_genes |
| chr14 | 23900944  | 23901103  | MYH7   | 693_selected_genes |
| chr14 | 23901662  | 23901740  | MYH7   | 693_selected_genes |
| chr14 | 23901822  | 23902029  | MYH7   | 693_selected_genes |
| chr14 | 23902267  | 23902461  | MYH7   | 693_selected_genes |
| chr14 | 23902715  | 23902966  | MYH7   | 693_selected_genes |
| chr22 | 36678688  | 36678856  | MYH9   | 693_selected_genes |
| chr22 | 36680113  | 36680336  | MYH9   | 693_selected_genes |
| chr22 | 36680423  | 36680582  | MYH9   | 693_selected_genes |
| chr22 | 36681141  | 36681400  | MYH9   | 693_selected_genes |
| chr22 | 36681678  | 36681852  | MYH9   | 693_selected_genes |
| chr22 | 36681885  | 36682024  | MYH9   | 693_selected_genes |
| chr22 | 36682738  | 36682917  | MYH9   | 693_selected_genes |
| chr22 | 36684272  | 36684484  | MYH9   | 693_selected_genes |
| chr22 | 36684747  | 36685010  | MYH9   | 693_selected_genes |
| chr22 | 36685105  | 36685368  | MYH9   | 693_selected_genes |

|       |           |           |       |                    |
|-------|-----------|-----------|-------|--------------------|
| chr22 | 36688006  | 36688305  | MYH9  | 693_selected_genes |
| chr22 | 36689349  | 36689552  | MYH9  | 693_selected_genes |
| chr22 | 36689779  | 36689934  | MYH9  | 693_selected_genes |
| chr22 | 36690112  | 36690369  | MYH9  | 693_selected_genes |
| chr22 | 36690952  | 36691147  | MYH9  | 693_selected_genes |
| chr22 | 36691525  | 36691788  | MYH9  | 693_selected_genes |
| chr22 | 36692863  | 36693085  | MYH9  | 693_selected_genes |
| chr22 | 36694939  | 36695113  | MYH9  | 693_selected_genes |
| chr22 | 36696147  | 36696335  | MYH9  | 693_selected_genes |
| chr22 | 36696871  | 36697128  | MYH9  | 693_selected_genes |
| chr22 | 36697554  | 36697736  | MYH9  | 693_selected_genes |
| chr22 | 36698588  | 36698747  | MYH9  | 693_selected_genes |
| chr22 | 36700015  | 36700226  | MYH9  | 693_selected_genes |
| chr22 | 36701053  | 36701173  | MYH9  | 693_selected_genes |
| chr22 | 36701950  | 36702122  | MYH9  | 693_selected_genes |
| chr22 | 36702434  | 36702678  | MYH9  | 693_selected_genes |
| chr22 | 36705301  | 36705466  | MYH9  | 693_selected_genes |
| chr22 | 36708068  | 36708292  | MYH9  | 693_selected_genes |
| chr22 | 36710164  | 36710388  | MYH9  | 693_selected_genes |
| chr22 | 36712536  | 36712739  | MYH9  | 693_selected_genes |
| chr22 | 36714226  | 36714395  | MYH9  | 693_selected_genes |
| chr22 | 36715559  | 36715705  | MYH9  | 693_selected_genes |
| chr22 | 36716239  | 36716433  | MYH9  | 693_selected_genes |
| chr22 | 36716817  | 36716966  | MYH9  | 693_selected_genes |
| chr22 | 36717777  | 36717891  | MYH9  | 693_selected_genes |
| chr22 | 36718448  | 36718591  | MYH9  | 693_selected_genes |
| chr22 | 36721098  | 36721193  | MYH9  | 693_selected_genes |
| chr22 | 36722587  | 36722731  | MYH9  | 693_selected_genes |
| chr22 | 36723480  | 36723558  | MYH9  | 693_selected_genes |
| chr22 | 36737389  | 36737596  | MYH9  | 693_selected_genes |
| chr22 | 36744923  | 36745306  | MYH9  | 693_selected_genes |
| chr12 | 111348855 | 111349004 | MYL2  | 693_selected_genes |
| chr12 | 111350874 | 111350973 | MYL2  | 693_selected_genes |
| chr12 | 111351024 | 111351153 | MYL2  | 693_selected_genes |
| chr12 | 111351964 | 111352153 | MYL2  | 693_selected_genes |
| chr12 | 111353493 | 111353619 | MYL2  | 693_selected_genes |
| chr12 | 111356882 | 111357022 | MYL2  | 693_selected_genes |
| chr12 | 111358305 | 111358358 | MYL2  | 693_selected_genes |
| chr3  | 46899708  | 46899787  | MYL3  | 693_selected_genes |
| chr3  | 46899848  | 46899976  | MYL3  | 693_selected_genes |
| chr3  | 46900939  | 46901163  | MYL3  | 693_selected_genes |
| chr3  | 46902140  | 46902340  | MYL3  | 693_selected_genes |
| chr3  | 46902424  | 46902502  | MYL3  | 693_selected_genes |
| chr3  | 46904726  | 46904905  | MYL3  | 693_selected_genes |
| chr3  | 123332926 | 123333221 | MYLK  | 693_selected_genes |
| chr3  | 123337460 | 123337642 | MYLK  | 693_selected_genes |
| chr3  | 123339028 | 123339208 | MYLK  | 693_selected_genes |
| chr3  | 123345639 | 123345813 | MYLK  | 693_selected_genes |
| chr3  | 123348295 | 123348498 | MYLK  | 693_selected_genes |
| chr3  | 123356892 | 123357066 | MYLK  | 693_selected_genes |
| chr3  | 123359108 | 123359376 | MYLK  | 693_selected_genes |
| chr3  | 123366045 | 123366299 | MYLK  | 693_selected_genes |
| chr3  | 123367792 | 123367936 | MYLK  | 693_selected_genes |
| chr3  | 123367983 | 123368066 | MYLK  | 693_selected_genes |
| chr3  | 123375947 | 123376300 | MYLK  | 693_selected_genes |
| chr3  | 123382926 | 123383130 | MYLK  | 693_selected_genes |
| chr3  | 123385040 | 123385218 | MYLK  | 693_selected_genes |
| chr3  | 123385958 | 123386059 | MYLK  | 693_selected_genes |
| chr3  | 123401045 | 123401182 | MYLK  | 693_selected_genes |
| chr3  | 123411556 | 123411723 | MYLK  | 693_selected_genes |
| chr3  | 123418841 | 123419877 | MYLK  | 693_selected_genes |
| chr3  | 123420259 | 123420381 | MYLK  | 693_selected_genes |
| chr3  | 123426575 | 123426875 | MYLK  | 693_selected_genes |
| chr3  | 123427519 | 123427767 | MYLK  | 693_selected_genes |
| chr3  | 123428577 | 123428765 | MYLK  | 693_selected_genes |
| chr3  | 123440949 | 123441152 | MYLK  | 693_selected_genes |
| chr3  | 123444765 | 123444950 | MYLK  | 693_selected_genes |
| chr3  | 123451717 | 123451974 | MYLK  | 693_selected_genes |
| chr3  | 123452508 | 123453094 | MYLK  | 693_selected_genes |
| chr3  | 123454219 | 123454288 | MYLK  | 693_selected_genes |
| chr3  | 123456199 | 123456415 | MYLK  | 693_selected_genes |
| chr3  | 123457718 | 123457934 | MYLK  | 693_selected_genes |
| chr3  | 123458774 | 123458873 | MYLK  | 693_selected_genes |
| chr3  | 123471152 | 123471410 | MYLK  | 693_selected_genes |
| chr3  | 123512498 | 123512713 | MYLK  | 693_selected_genes |
| chr11 | 17741304  | 17741984  | MYOD1 | 693_selected_genes |
| chr11 | 17742423  | 17742552  | MYOD1 | 693_selected_genes |
| chr11 | 17742776  | 17743080  | MYOD1 | 693_selected_genes |
| chr12 | 78225216  | 78225509  | NAV3  | 693_selected_genes |
| chr12 | 78334073  | 78334241  | NAV3  | 693_selected_genes |
| chr12 | 78334835  | 78334938  | NAV3  | 693_selected_genes |
| chr12 | 78359983  | 78360106  | NAV3  | 693_selected_genes |
| chr12 | 78362273  | 78362507  | NAV3  | 693_selected_genes |
| chr12 | 78388557  | 78388676  | NAV3  | 693_selected_genes |

|       |          |          |       |                    |
|-------|----------|----------|-------|--------------------|
| chr12 | 78392091 | 78392281 | NAV3  | 693_selected_genes |
| chr12 | 78400173 | 78401250 | NAV3  | 693_selected_genes |
| chr12 | 78415501 | 78415667 | NAV3  | 693_selected_genes |
| chr12 | 78443747 | 78443906 | NAV3  | 693_selected_genes |
| chr12 | 78444518 | 78444952 | NAV3  | 693_selected_genes |
| chr12 | 78452750 | 78452920 | NAV3  | 693_selected_genes |
| chr12 | 78510526 | 78510709 | NAV3  | 693_selected_genes |
| chr12 | 78511781 | 78512102 | NAV3  | 693_selected_genes |
| chr12 | 78512991 | 78513750 | NAV3  | 693_selected_genes |
| chr12 | 78515694 | 78516233 | NAV3  | 693_selected_genes |
| chr12 | 78520921 | 78521013 | NAV3  | 693_selected_genes |
| chr12 | 78522460 | 78522671 | NAV3  | 693_selected_genes |
| chr12 | 78530931 | 78531170 | NAV3  | 693_selected_genes |
| chr12 | 78534036 | 78534139 | NAV3  | 693_selected_genes |
| chr12 | 78537148 | 78537222 | NAV3  | 693_selected_genes |
| chr12 | 78540123 | 78540197 | NAV3  | 693_selected_genes |
| chr12 | 78542596 | 78542724 | NAV3  | 693_selected_genes |
| chr12 | 78552957 | 78553091 | NAV3  | 693_selected_genes |
| chr12 | 78562509 | 78562671 | NAV3  | 693_selected_genes |
| chr12 | 78569060 | 78569232 | NAV3  | 693_selected_genes |
| chr12 | 78570193 | 78570264 | NAV3  | 693_selected_genes |
| chr12 | 78570895 | 78571118 | NAV3  | 693_selected_genes |
| chr12 | 78571374 | 78571490 | NAV3  | 693_selected_genes |
| chr12 | 78573283 | 78573487 | NAV3  | 693_selected_genes |
| chr12 | 78574625 | 78574850 | NAV3  | 693_selected_genes |
| chr12 | 78579355 | 78579503 | NAV3  | 693_selected_genes |
| chr12 | 78582002 | 78582148 | NAV3  | 693_selected_genes |
| chr12 | 78582363 | 78582582 | NAV3  | 693_selected_genes |
| chr12 | 78583738 | 78584024 | NAV3  | 693_selected_genes |
| chr12 | 78591001 | 78591206 | NAV3  | 693_selected_genes |
| chr12 | 78592359 | 78592481 | NAV3  | 693_selected_genes |
| chr12 | 78592830 | 78593000 | NAV3  | 693_selected_genes |
| chr12 | 78593089 | 78593336 | NAV3  | 693_selected_genes |
| chr12 | 78594227 | 78594396 | NAV3  | 693_selected_genes |
| chr12 | 78598689 | 78598943 | NAV3  | 693_selected_genes |
| chr12 | 78604152 | 78604322 | NAV3  | 693_selected_genes |
| chr8  | 90947784 | 90947865 | NBN   | 693_selected_genes |
| chr8  | 90949228 | 90949328 | NBN   | 693_selected_genes |
| chr8  | 90955455 | 90955619 | NBN   | 693_selected_genes |
| chr8  | 90958342 | 90958548 | NBN   | 693_selected_genes |
| chr8  | 90960026 | 90960145 | NBN   | 693_selected_genes |
| chr8  | 90965446 | 90965944 | NBN   | 693_selected_genes |
| chr8  | 90967485 | 90967808 | NBN   | 693_selected_genes |
| chr8  | 90970927 | 90971107 | NBN   | 693_selected_genes |
| chr8  | 90976612 | 90976760 | NBN   | 693_selected_genes |
| chr8  | 90982566 | 90982810 | NBN   | 693_selected_genes |
| chr8  | 90983375 | 90983543 | NBN   | 693_selected_genes |
| chr8  | 90990422 | 90990576 | NBN   | 693_selected_genes |
| chr8  | 90992936 | 90993146 | NBN   | 693_selected_genes |
| chr8  | 90993577 | 90993776 | NBN   | 693_selected_genes |
| chr8  | 90994199 | 90994255 | NBN   | 693_selected_genes |
| chr8  | 90994924 | 90995108 | NBN   | 693_selected_genes |
| chr8  | 90996727 | 90996814 | NBN   | 693_selected_genes |
| chr20 | 46250966 | 46251099 | NCOA3 | 693_selected_genes |
| chr20 | 46252629 | 46252852 | NCOA3 | 693_selected_genes |
| chr20 | 46254099 | 46254250 | NCOA3 | 693_selected_genes |
| chr20 | 46255720 | 46255945 | NCOA3 | 693_selected_genes |
| chr20 | 46256279 | 46256518 | NCOA3 | 693_selected_genes |
| chr20 | 46256640 | 46256792 | NCOA3 | 693_selected_genes |
| chr20 | 46262214 | 46262405 | NCOA3 | 693_selected_genes |
| chr20 | 46262736 | 46262964 | NCOA3 | 693_selected_genes |
| chr20 | 46264040 | 46264482 | NCOA3 | 693_selected_genes |
| chr20 | 46264609 | 46265531 | NCOA3 | 693_selected_genes |
| chr20 | 46266366 | 46266552 | NCOA3 | 693_selected_genes |
| chr20 | 46267726 | 46267971 | NCOA3 | 693_selected_genes |
| chr20 | 46268295 | 46268591 | NCOA3 | 693_selected_genes |
| chr20 | 46268643 | 46268820 | NCOA3 | 693_selected_genes |
| chr20 | 46270931 | 46271153 | NCOA3 | 693_selected_genes |
| chr20 | 46275791 | 46276135 | NCOA3 | 693_selected_genes |
| chr20 | 46277723 | 46277878 | NCOA3 | 693_selected_genes |
| chr20 | 46279700 | 46280045 | NCOA3 | 693_selected_genes |
| chr20 | 46281124 | 46281349 | NCOA3 | 693_selected_genes |
| chr20 | 46281649 | 46281841 | NCOA3 | 693_selected_genes |
| chr20 | 46282124 | 46282186 | NCOA3 | 693_selected_genes |
| chr17 | 15935584 | 15935822 | NCOR1 | 693_selected_genes |
| chr17 | 15938053 | 15938283 | NCOR1 | 693_selected_genes |
| chr17 | 15942581 | 15942993 | NCOR1 | 693_selected_genes |
| chr17 | 15943729 | 15943833 | NCOR1 | 693_selected_genes |
| chr17 | 15950239 | 15950432 | NCOR1 | 693_selected_genes |
| chr17 | 15952133 | 15952327 | NCOR1 | 693_selected_genes |
| chr17 | 15960802 | 15961076 | NCOR1 | 693_selected_genes |
| chr17 | 15961195 | 15961403 | NCOR1 | 693_selected_genes |
| chr17 | 15961759 | 15961938 | NCOR1 | 693_selected_genes |
| chr17 | 15964689 | 15965233 | NCOR1 | 693_selected_genes |

|       |           |           |       |                    |
|-------|-----------|-----------|-------|--------------------|
| chr17 | 15965393  | 15965609  | NCOR1 | 693_selected_genes |
| chr17 | 15967356  | 15967526  | NCOR1 | 693_selected_genes |
| chr17 | 15968158  | 15968358  | NCOR1 | 693_selected_genes |
| chr17 | 15968773  | 15969033  | NCOR1 | 693_selected_genes |
| chr17 | 15971182  | 15971460  | NCOR1 | 693_selected_genes |
| chr17 | 15973453  | 15973864  | NCOR1 | 693_selected_genes |
| chr17 | 15974697  | 15975004  | NCOR1 | 693_selected_genes |
| chr17 | 15975433  | 15975567  | NCOR1 | 693_selected_genes |
| chr17 | 15976717  | 15976908  | NCOR1 | 693_selected_genes |
| chr17 | 15978822  | 15979041  | NCOR1 | 693_selected_genes |
| chr17 | 15983252  | 15983403  | NCOR1 | 693_selected_genes |
| chr17 | 15983696  | 15983848  | NCOR1 | 693_selected_genes |
| chr17 | 15983895  | 15984066  | NCOR1 | 693_selected_genes |
| chr17 | 15989570  | 15989781  | NCOR1 | 693_selected_genes |
| chr17 | 15990460  | 15990684  | NCOR1 | 693_selected_genes |
| chr17 | 15995143  | 15995397  | NCOR1 | 693_selected_genes |
| chr17 | 16001655  | 16001835  | NCOR1 | 693_selected_genes |
| chr17 | 16004538  | 16005144  | NCOR1 | 693_selected_genes |
| chr17 | 16012074  | 16012251  | NCOR1 | 693_selected_genes |
| chr17 | 16021176  | 16021366  | NCOR1 | 693_selected_genes |
| chr17 | 16022711  | 16022824  | NCOR1 | 693_selected_genes |
| chr17 | 16024340  | 16024608  | NCOR1 | 693_selected_genes |
| chr17 | 16029370  | 16029548  | NCOR1 | 693_selected_genes |
| chr17 | 16040599  | 16040751  | NCOR1 | 693_selected_genes |
| chr17 | 16041446  | 16041551  | NCOR1 | 693_selected_genes |
| chr17 | 16042296  | 16042525  | NCOR1 | 693_selected_genes |
| chr17 | 16046894  | 16047035  | NCOR1 | 693_selected_genes |
| chr17 | 16049664  | 16049887  | NCOR1 | 693_selected_genes |
| chr17 | 16052739  | 16052856  | NCOR1 | 693_selected_genes |
| chr17 | 16054878  | 16054955  | NCOR1 | 693_selected_genes |
| chr17 | 16055234  | 16055337  | NCOR1 | 693_selected_genes |
| chr17 | 16056627  | 16056734  | NCOR1 | 693_selected_genes |
| chr17 | 16062048  | 16062212  | NCOR1 | 693_selected_genes |
| chr17 | 16068267  | 16068500  | NCOR1 | 693_selected_genes |
| chr17 | 16075091  | 16075359  | NCOR1 | 693_selected_genes |
| chr17 | 16089842  | 16090026  | NCOR1 | 693_selected_genes |
| chr17 | 16097750  | 16097908  | NCOR1 | 693_selected_genes |
| chr12 | 124809922 | 124810154 | NCOR2 | 693_selected_genes |
| chr12 | 124810700 | 124810941 | NCOR2 | 693_selected_genes |
| chr12 | 124811929 | 124812204 | NCOR2 | 693_selected_genes |
| chr12 | 124813604 | 124813728 | NCOR2 | 693_selected_genes |
| chr12 | 124815365 | 124815469 | NCOR2 | 693_selected_genes |
| chr12 | 124816839 | 124817038 | NCOR2 | 693_selected_genes |
| chr12 | 124817650 | 124817850 | NCOR2 | 693_selected_genes |
| chr12 | 124818944 | 124819217 | NCOR2 | 693_selected_genes |
| chr12 | 124819655 | 124819851 | NCOR2 | 693_selected_genes |
| chr12 | 124820003 | 124820203 | NCOR2 | 693_selected_genes |
| chr12 | 124821273 | 124821751 | NCOR2 | 693_selected_genes |
| chr12 | 124824526 | 124824775 | NCOR2 | 693_selected_genes |
| chr12 | 124824814 | 124825014 | NCOR2 | 693_selected_genes |
| chr12 | 124825122 | 124825322 | NCOR2 | 693_selected_genes |
| chr12 | 124826343 | 124826645 | NCOR2 | 693_selected_genes |
| chr12 | 124827525 | 124827797 | NCOR2 | 693_selected_genes |
| chr12 | 124829117 | 124829522 | NCOR2 | 693_selected_genes |
| chr12 | 124831084 | 124831421 | NCOR2 | 693_selected_genes |
| chr12 | 124832345 | 124832482 | NCOR2 | 693_selected_genes |
| chr12 | 124832694 | 124832885 | NCOR2 | 693_selected_genes |
| chr12 | 124835107 | 124835308 | NCOR2 | 693_selected_genes |
| chr12 | 124838613 | 124838767 | NCOR2 | 693_selected_genes |
| chr12 | 124838998 | 124839153 | NCOR2 | 693_selected_genes |
| chr12 | 124839357 | 124839510 | NCOR2 | 693_selected_genes |
| chr12 | 124839952 | 124840142 | NCOR2 | 693_selected_genes |
| chr12 | 124841162 | 124841377 | NCOR2 | 693_selected_genes |
| chr12 | 124846646 | 124846868 | NCOR2 | 693_selected_genes |
| chr12 | 124848199 | 124848370 | NCOR2 | 693_selected_genes |
| chr12 | 124856542 | 124857181 | NCOR2 | 693_selected_genes |
| chr12 | 124858933 | 124859034 | NCOR2 | 693_selected_genes |
| chr12 | 124862757 | 124862955 | NCOR2 | 693_selected_genes |
| chr12 | 124870265 | 124870458 | NCOR2 | 693_selected_genes |
| chr12 | 124873205 | 124873301 | NCOR2 | 693_selected_genes |
| chr12 | 124882639 | 124882752 | NCOR2 | 693_selected_genes |
| chr12 | 124885021 | 124885244 | NCOR2 | 693_selected_genes |
| chr12 | 124886924 | 124887132 | NCOR2 | 693_selected_genes |
| chr12 | 124904477 | 124904626 | NCOR2 | 693_selected_genes |
| chr12 | 124907021 | 124907126 | NCOR2 | 693_selected_genes |
| chr12 | 124911142 | 124911371 | NCOR2 | 693_selected_genes |
| chr12 | 124914133 | 124914277 | NCOR2 | 693_selected_genes |
| chr12 | 124915131 | 124915358 | NCOR2 | 693_selected_genes |
| chr12 | 124922450 | 124922567 | NCOR2 | 693_selected_genes |
| chr12 | 124934335 | 124934438 | NCOR2 | 693_selected_genes |
| chr12 | 124941626 | 124941733 | NCOR2 | 693_selected_genes |
| chr12 | 124950693 | 124950857 | NCOR2 | 693_selected_genes |
| chr12 | 124957472 | 124957702 | NCOR2 | 693_selected_genes |
| chr12 | 124968116 | 124968345 | NCOR2 | 693_selected_genes |

|       |           |           |        |                    |
|-------|-----------|-----------|--------|--------------------|
| chr12 | 124970961 | 124971139 | NCOR2  | 693_selected_genes |
| chr12 | 124979667 | 124979822 | NCOR2  | 693_selected_genes |
| chr18 | 55711867  | 55711965  | NEDD4L | 693_selected_genes |
| chr18 | 55816742  | 55816816  | NEDD4L | 693_selected_genes |
| chr18 | 55832994  | 55833118  | NEDD4L | 693_selected_genes |
| chr18 | 55912633  | 55912765  | NEDD4L | 693_selected_genes |
| chr18 | 55916105  | 55916194  | NEDD4L | 693_selected_genes |
| chr18 | 55919207  | 55919311  | NEDD4L | 693_selected_genes |
| chr18 | 55983188  | 55983289  | NEDD4L | 693_selected_genes |
| chr18 | 55989631  | 55989743  | NEDD4L | 693_selected_genes |
| chr18 | 55990438  | 55990591  | NEDD4L | 693_selected_genes |
| chr18 | 55992202  | 55992419  | NEDD4L | 693_selected_genes |
| chr18 | 55996201  | 55996384  | NEDD4L | 693_selected_genes |
| chr18 | 55997944  | 55998171  | NEDD4L | 693_selected_genes |
| chr18 | 56001024  | 56001149  | NEDD4L | 693_selected_genes |
| chr18 | 56002684  | 56002794  | NEDD4L | 693_selected_genes |
| chr18 | 56008244  | 56008426  | NEDD4L | 693_selected_genes |
| chr18 | 56008884  | 56009054  | NEDD4L | 693_selected_genes |
| chr18 | 56010112  | 56010360  | NEDD4L | 693_selected_genes |
| chr18 | 56016743  | 56016871  | NEDD4L | 693_selected_genes |
| chr18 | 56018197  | 56018302  | NEDD4L | 693_selected_genes |
| chr18 | 56024400  | 56024509  | NEDD4L | 693_selected_genes |
| chr18 | 56024663  | 56024716  | NEDD4L | 693_selected_genes |
| chr18 | 56031474  | 56031590  | NEDD4L | 693_selected_genes |
| chr18 | 56033205  | 56033485  | NEDD4L | 693_selected_genes |
| chr18 | 56034952  | 56035124  | NEDD4L | 693_selected_genes |
| chr18 | 56037603  | 56037724  | NEDD4L | 693_selected_genes |
| chr18 | 56040380  | 56040526  | NEDD4L | 693_selected_genes |
| chr18 | 56050452  | 56050576  | NEDD4L | 693_selected_genes |
| chr18 | 56052732  | 56052843  | NEDD4L | 693_selected_genes |
| chr18 | 56054645  | 56054755  | NEDD4L | 693_selected_genes |
| chr18 | 56056291  | 56056449  | NEDD4L | 693_selected_genes |
| chr18 | 56057852  | 56057999  | NEDD4L | 693_selected_genes |
| chr18 | 56058693  | 56058816  | NEDD4L | 693_selected_genes |
| chr18 | 56063373  | 56063526  | NEDD4L | 693_selected_genes |
| chr17 | 29422200  | 29422412  | NF1    | 693_selected_genes |
| chr17 | 29482975  | 29483169  | NF1    | 693_selected_genes |
| chr17 | 29486002  | 29486136  | NF1    | 693_selected_genes |
| chr17 | 29490178  | 29490419  | NF1    | 693_selected_genes |
| chr17 | 29496883  | 29497040  | NF1    | 693_selected_genes |
| chr17 | 29508414  | 29508532  | NF1    | 693_selected_genes |
| chr17 | 29508702  | 29508828  | NF1    | 693_selected_genes |
| chr17 | 29509500  | 29509708  | NF1    | 693_selected_genes |
| chr17 | 29527414  | 29527638  | NF1    | 693_selected_genes |
| chr17 | 29528029  | 29528202  | NF1    | 693_selected_genes |
| chr17 | 29528403  | 29528528  | NF1    | 693_selected_genes |
| chr17 | 29533232  | 29533414  | NF1    | 693_selected_genes |
| chr17 | 29541443  | 29541628  | NF1    | 693_selected_genes |
| chr17 | 29545997  | 29546161  | NF1    | 693_selected_genes |
| chr17 | 29548842  | 29549033  | NF1    | 693_selected_genes |
| chr17 | 29550436  | 29550610  | NF1    | 693_selected_genes |
| chr17 | 29552087  | 29552293  | NF1    | 693_selected_genes |
| chr17 | 29553427  | 29553727  | NF1    | 693_selected_genes |
| chr17 | 29554210  | 29554334  | NF1    | 693_selected_genes |
| chr17 | 29554515  | 29554649  | NF1    | 693_selected_genes |
| chr17 | 29556017  | 29556508  | NF1    | 693_selected_genes |
| chr17 | 29556827  | 29557017  | NF1    | 693_selected_genes |
| chr17 | 29557252  | 29557425  | NF1    | 693_selected_genes |
| chr17 | 29557834  | 29557968  | NF1    | 693_selected_genes |
| chr17 | 29559065  | 29559232  | NF1    | 693_selected_genes |
| chr17 | 29559692  | 29559924  | NF1    | 693_selected_genes |
| chr17 | 29559994  | 29560256  | NF1    | 693_selected_genes |
| chr17 | 29562603  | 29562815  | NF1    | 693_selected_genes |
| chr17 | 29562910  | 29563064  | NF1    | 693_selected_genes |
| chr17 | 29575976  | 29576162  | NF1    | 693_selected_genes |
| chr17 | 29579930  | 29580043  | NF1    | 693_selected_genes |
| chr17 | 29584679  | 29584762  | NF1    | 693_selected_genes |
| chr17 | 29585336  | 29585545  | NF1    | 693_selected_genes |
| chr17 | 29586024  | 29586172  | NF1    | 693_selected_genes |
| chr17 | 29587361  | 29587558  | NF1    | 693_selected_genes |
| chr17 | 29588703  | 29588900  | NF1    | 693_selected_genes |
| chr17 | 29592221  | 29592382  | NF1    | 693_selected_genes |
| chr17 | 29626502  | 29626649  | NF1    | 693_selected_genes |
| chr17 | 29652812  | 29653295  | NF1    | 693_selected_genes |
| chr17 | 29654491  | 29654882  | NF1    | 693_selected_genes |
| chr17 | 29657288  | 29657541  | NF1    | 693_selected_genes |
| chr17 | 29661656  | 29661773  | NF1    | 693_selected_genes |
| chr17 | 29661830  | 29662074  | NF1    | 693_selected_genes |
| chr17 | 29663325  | 29663516  | NF1    | 693_selected_genes |
| chr17 | 29663627  | 29663957  | NF1    | 693_selected_genes |
| chr17 | 29664360  | 29664625  | NF1    | 693_selected_genes |
| chr17 | 29664809  | 29664923  | NF1    | 693_selected_genes |
| chr17 | 29664994  | 29665182  | NF1    | 693_selected_genes |
| chr17 | 29665696  | 29665848  | NF1    | 693_selected_genes |

|       |           |           |        |                    |
|-------|-----------|-----------|--------|--------------------|
| chr17 | 29667497  | 29667688  | NF1    | 693_selected_genes |
| chr17 | 29670001  | 29670178  | NF1    | 693_selected_genes |
| chr17 | 29676112  | 29676294  | NF1    | 693_selected_genes |
| chr17 | 29677175  | 29677361  | NF1    | 693_selected_genes |
| chr17 | 29679249  | 29679457  | NF1    | 693_selected_genes |
| chr17 | 29683452  | 29683625  | NF1    | 693_selected_genes |
| chr17 | 29683952  | 29684133  | NF1    | 693_selected_genes |
| chr17 | 29684261  | 29684412  | NF1    | 693_selected_genes |
| chr17 | 29685472  | 29685665  | NF1    | 693_selected_genes |
| chr17 | 29685961  | 29686058  | NF1    | 693_selected_genes |
| chr17 | 29687479  | 29687754  | NF1    | 693_selected_genes |
| chr17 | 29694217  | 29694321  | NF1    | 693_selected_genes |
| chr17 | 29701005  | 29701198  | NF1    | 693_selected_genes |
| chr17 | 29705880  | 29705974  | NF1    | 693_selected_genes |
| chr22 | 29999962  | 30000126  | NF2    | 693_selected_genes |
| chr22 | 30032714  | 30032890  | NF2    | 693_selected_genes |
| chr22 | 30035053  | 30035226  | NF2    | 693_selected_genes |
| chr22 | 30038165  | 30038299  | NF2    | 693_selected_genes |
| chr22 | 30050620  | 30050739  | NF2    | 693_selected_genes |
| chr22 | 30051557  | 30051690  | NF2    | 693_selected_genes |
| chr22 | 30054152  | 30054278  | NF2    | 693_selected_genes |
| chr22 | 30057168  | 30057353  | NF2    | 693_selected_genes |
| chr22 | 30060953  | 30061078  | NF2    | 693_selected_genes |
| chr22 | 30064296  | 30064460  | NF2    | 693_selected_genes |
| chr22 | 30067789  | 30067962  | NF2    | 693_selected_genes |
| chr22 | 30069232  | 30069500  | NF2    | 693_selected_genes |
| chr22 | 30070799  | 30070955  | NF2    | 693_selected_genes |
| chr22 | 30074159  | 30074337  | NF2    | 693_selected_genes |
| chr22 | 30077402  | 30077615  | NF2    | 693_selected_genes |
| chr22 | 30078983  | 30079069  | NF2    | 693_selected_genes |
| chr22 | 30090715  | 30090816  | NF2    | 693_selected_genes |
| chr2  | 178092608 | 178092706 | NFE2L2 | 693_selected_genes |
| chr2  | 178095487 | 178096761 | NFE2L2 | 693_selected_genes |
| chr2  | 178097094 | 178097336 | NFE2L2 | 693_selected_genes |
| chr2  | 178097880 | 178098092 | NFE2L2 | 693_selected_genes |
| chr2  | 178098707 | 178099024 | NFE2L2 | 693_selected_genes |
| chr2  | 178129234 | 178129329 | NFE2L2 | 693_selected_genes |
| chr2  | 178175666 | 178175758 | NFE2L2 | 693_selected_genes |
| chr4  | 103432064 | 103432131 | NFKB1  | 693_selected_genes |
| chr4  | 103446643 | 103446739 | NFKB1  | 693_selected_genes |
| chr4  | 103450967 | 103451096 | NFKB1  | 693_selected_genes |
| chr4  | 103454976 | 103455067 | NFKB1  | 693_selected_genes |
| chr4  | 103458989 | 103459138 | NFKB1  | 693_selected_genes |
| chr4  | 103488118 | 103488317 | NFKB1  | 693_selected_genes |
| chr4  | 103498007 | 103498221 | NFKB1  | 693_selected_genes |
| chr4  | 103499984 | 103500221 | NFKB1  | 693_selected_genes |
| chr4  | 103501666 | 103501821 | NFKB1  | 693_selected_genes |
| chr4  | 103503997 | 103504139 | NFKB1  | 693_selected_genes |
| chr4  | 103505813 | 103506002 | NFKB1  | 693_selected_genes |
| chr4  | 103514556 | 103514750 | NFKB1  | 693_selected_genes |
| chr4  | 103516023 | 103516163 | NFKB1  | 693_selected_genes |
| chr4  | 103517269 | 103517514 | NFKB1  | 693_selected_genes |
| chr4  | 103518651 | 103518843 | NFKB1  | 693_selected_genes |
| chr4  | 103522026 | 103522191 | NFKB1  | 693_selected_genes |
| chr4  | 103527627 | 103527879 | NFKB1  | 693_selected_genes |
| chr4  | 103528281 | 103528501 | NFKB1  | 693_selected_genes |
| chr4  | 103528780 | 103528933 | NFKB1  | 693_selected_genes |
| chr4  | 103531706 | 103531881 | NFKB1  | 693_selected_genes |
| chr4  | 103533175 | 103533292 | NFKB1  | 693_selected_genes |
| chr4  | 103533565 | 103533788 | NFKB1  | 693_selected_genes |
| chr4  | 103534556 | 103534763 | NFKB1  | 693_selected_genes |
| chr4  | 103537565 | 103537776 | NFKB1  | 693_selected_genes |
| chr10 | 104155691 | 104155762 | NFKB2  | 693_selected_genes |
| chr10 | 104155984 | 104156116 | NFKB2  | 693_selected_genes |
| chr10 | 104156180 | 104156271 | NFKB2  | 693_selected_genes |
| chr10 | 104156456 | 104156605 | NFKB2  | 693_selected_genes |
| chr10 | 104156635 | 104156837 | NFKB2  | 693_selected_genes |
| chr10 | 104157033 | 104157190 | NFKB2  | 693_selected_genes |
| chr10 | 104157258 | 104157467 | NFKB2  | 693_selected_genes |
| chr10 | 104157712 | 104157867 | NFKB2  | 693_selected_genes |
| chr10 | 104157943 | 104158079 | NFKB2  | 693_selected_genes |
| chr10 | 104158116 | 104158305 | NFKB2  | 693_selected_genes |
| chr10 | 104158470 | 104158646 | NFKB2  | 693_selected_genes |
| chr10 | 104159019 | 104159279 | NFKB2  | 693_selected_genes |
| chr10 | 104159308 | 104159500 | NFKB2  | 693_selected_genes |
| chr10 | 104159811 | 104159976 | NFKB2  | 693_selected_genes |
| chr10 | 104160009 | 104160273 | NFKB2  | 693_selected_genes |
| chr10 | 104160386 | 104160606 | NFKB2  | 693_selected_genes |
| chr10 | 104160678 | 104160831 | NFKB2  | 693_selected_genes |
| chr10 | 104160911 | 104161113 | NFKB2  | 693_selected_genes |
| chr10 | 104161180 | 104161300 | NFKB2  | 693_selected_genes |
| chr10 | 104161476 | 104161699 | NFKB2  | 693_selected_genes |
| chr10 | 104161779 | 104161941 | NFKB2  | 693_selected_genes |
| chr10 | 104161983 | 104162158 | NFKB2  | 693_selected_genes |

|       |          |          |        |                    |
|-------|----------|----------|--------|--------------------|
| chr14 | 35871193 | 35871291 | NFKBIA | 693_selected_genes |
| chr14 | 35871574 | 35871894 | NFKBIA | 693_selected_genes |
| chr14 | 35871951 | 35872090 | NFKBIA | 693_selected_genes |
| chr14 | 35872330 | 35872591 | NFKBIA | 693_selected_genes |
| chr14 | 35872870 | 35873029 | NFKBIA | 693_selected_genes |
| chr14 | 35873598 | 35873875 | NFKBIA | 693_selected_genes |
| chr14 | 51190155 | 51190415 | NIN    | 693_selected_genes |
| chr14 | 51192564 | 51192809 | NIN    | 693_selected_genes |
| chr14 | 51194381 | 51194494 | NIN    | 693_selected_genes |
| chr14 | 51196215 | 51196466 | NIN    | 693_selected_genes |
| chr14 | 51197615 | 51197726 | NIN    | 693_selected_genes |
| chr14 | 51202208 | 51202360 | NIN    | 693_selected_genes |
| chr14 | 51204832 | 51205029 | NIN    | 693_selected_genes |
| chr14 | 51206000 | 51206230 | NIN    | 693_selected_genes |
| chr14 | 51208274 | 51208471 | NIN    | 693_selected_genes |
| chr14 | 51210108 | 51210272 | NIN    | 693_selected_genes |
| chr14 | 51210935 | 51211108 | NIN    | 693_selected_genes |
| chr14 | 51214684 | 51214848 | NIN    | 693_selected_genes |
| chr14 | 51219210 | 51219476 | NIN    | 693_selected_genes |
| chr14 | 51221255 | 51221375 | NIN    | 693_selected_genes |
| chr14 | 51221434 | 51221610 | NIN    | 693_selected_genes |
| chr14 | 51223184 | 51225373 | NIN    | 693_selected_genes |
| chr14 | 51226549 | 51227102 | NIN    | 693_selected_genes |
| chr14 | 51228482 | 51228654 | NIN    | 693_selected_genes |
| chr14 | 51230518 | 51230707 | NIN    | 693_selected_genes |
| chr14 | 51232999 | 51233139 | NIN    | 693_selected_genes |
| chr14 | 51233472 | 51233633 | NIN    | 693_selected_genes |
| chr14 | 51237080 | 51237305 | NIN    | 693_selected_genes |
| chr14 | 51237544 | 51237735 | NIN    | 693_selected_genes |
| chr14 | 51238024 | 51238211 | NIN    | 693_selected_genes |
| chr14 | 51238993 | 51239211 | NIN    | 693_selected_genes |
| chr14 | 51239641 | 51239838 | NIN    | 693_selected_genes |
| chr14 | 51243641 | 51243882 | NIN    | 693_selected_genes |
| chr14 | 51245457 | 51245547 | NIN    | 693_selected_genes |
| chr14 | 51259191 | 51259256 | NIN    | 693_selected_genes |
| chr14 | 51259404 | 51259624 | NIN    | 693_selected_genes |
| chr14 | 51273429 | 51273561 | NIN    | 693_selected_genes |
| chr14 | 51288566 | 51288799 | NIN    | 693_selected_genes |
| chr14 | 51289872 | 51290047 | NIN    | 693_selected_genes |
| chr14 | 51297156 | 51297260 | NIN    | 693_selected_genes |
| chr14 | 51297698 | 51297851 | NIN    | 693_selected_genes |
| chr5  | 36953773 | 36953887 | NIPBL  | 693_selected_genes |
| chr5  | 36955548 | 36955764 | NIPBL  | 693_selected_genes |
| chr5  | 36958180 | 36958358 | NIPBL  | 693_selected_genes |
| chr5  | 36961560 | 36961710 | NIPBL  | 693_selected_genes |
| chr5  | 36962199 | 36962401 | NIPBL  | 693_selected_genes |
| chr5  | 36970952 | 36971163 | NIPBL  | 693_selected_genes |
| chr5  | 36972021 | 36972168 | NIPBL  | 693_selected_genes |
| chr5  | 36975852 | 36976529 | NIPBL  | 693_selected_genes |
| chr5  | 36984752 | 36986428 | NIPBL  | 693_selected_genes |
| chr5  | 36995698 | 36995931 | NIPBL  | 693_selected_genes |
| chr5  | 37000449 | 37000697 | NIPBL  | 693_selected_genes |
| chr5  | 37000893 | 37001015 | NIPBL  | 693_selected_genes |
| chr5  | 37001065 | 37001205 | NIPBL  | 693_selected_genes |
| chr5  | 37002738 | 37002892 | NIPBL  | 693_selected_genes |
| chr5  | 37003337 | 37003474 | NIPBL  | 693_selected_genes |
| chr5  | 37006433 | 37006715 | NIPBL  | 693_selected_genes |
| chr5  | 37007399 | 37007601 | NIPBL  | 693_selected_genes |
| chr5  | 37008084 | 37008215 | NIPBL  | 693_selected_genes |
| chr5  | 37008699 | 37008850 | NIPBL  | 693_selected_genes |
| chr5  | 37010163 | 37010352 | NIPBL  | 693_selected_genes |
| chr5  | 37014759 | 37014892 | NIPBL  | 693_selected_genes |
| chr5  | 37016114 | 37016297 | NIPBL  | 693_selected_genes |
| chr5  | 37017095 | 37017289 | NIPBL  | 693_selected_genes |
| chr5  | 37019387 | 37019527 | NIPBL  | 693_selected_genes |
| chr5  | 37020535 | 37020800 | NIPBL  | 693_selected_genes |
| chr5  | 37020851 | 37021004 | NIPBL  | 693_selected_genes |
| chr5  | 37022127 | 37022276 | NIPBL  | 693_selected_genes |
| chr5  | 37022320 | 37022517 | NIPBL  | 693_selected_genes |
| chr5  | 37024661 | 37024846 | NIPBL  | 693_selected_genes |
| chr5  | 37026305 | 37026454 | NIPBL  | 693_selected_genes |
| chr5  | 37027435 | 37027539 | NIPBL  | 693_selected_genes |
| chr5  | 37036455 | 37036614 | NIPBL  | 693_selected_genes |
| chr5  | 37038678 | 37038865 | NIPBL  | 693_selected_genes |
| chr5  | 37044423 | 37044614 | NIPBL  | 693_selected_genes |
| chr5  | 37044712 | 37044856 | NIPBL  | 693_selected_genes |
| chr5  | 37045519 | 37045724 | NIPBL  | 693_selected_genes |
| chr5  | 37046185 | 37046326 | NIPBL  | 693_selected_genes |
| chr5  | 37048578 | 37048802 | NIPBL  | 693_selected_genes |
| chr5  | 37049187 | 37049428 | NIPBL  | 693_selected_genes |
| chr5  | 37051855 | 37052013 | NIPBL  | 693_selected_genes |
| chr5  | 37052442 | 37052693 | NIPBL  | 693_selected_genes |
| chr5  | 37057262 | 37057459 | NIPBL  | 693_selected_genes |
| chr5  | 37058967 | 37059292 | NIPBL  | 693_selected_genes |

|       |           |           |        |                    |
|-------|-----------|-----------|--------|--------------------|
| chr5  | 37060920  | 37061145  | NIPBL  | 693_selected_genes |
| chr5  | 37063866  | 37064150  | NIPBL  | 693_selected_genes |
| chr5  | 37064603  | 37065019  | NIPBL  | 693_selected_genes |
| chr14 | 36986457  | 36987250  | NKX2-1 | 693_selected_genes |
| chr14 | 36988164  | 36988600  | NKX2-1 | 693_selected_genes |
| chr14 | 36988761  | 36988842  | NKX2-1 | 693_selected_genes |
| chr14 | 36989232  | 36989359  | NKX2-1 | 693_selected_genes |
| chr9  | 139390497 | 139392035 | NOTCH1 | 693_selected_genes |
| chr9  | 139393325 | 139393473 | NOTCH1 | 693_selected_genes |
| chr9  | 139393538 | 139393736 | NOTCH1 | 693_selected_genes |
| chr9  | 139394978 | 139395324 | NOTCH1 | 693_selected_genes |
| chr9  | 139396174 | 139396390 | NOTCH1 | 693_selected_genes |
| chr9  | 139396427 | 139396565 | NOTCH1 | 693_selected_genes |
| chr9  | 139396698 | 139396965 | NOTCH1 | 693_selected_genes |
| chr9  | 139397608 | 139397807 | NOTCH1 | 693_selected_genes |
| chr9  | 139399099 | 139399581 | NOTCH1 | 693_selected_genes |
| chr9  | 139399736 | 139400358 | NOTCH1 | 693_selected_genes |
| chr9  | 139400953 | 139401116 | NOTCH1 | 693_selected_genes |
| chr9  | 139401142 | 139401450 | NOTCH1 | 693_selected_genes |
| chr9  | 139401731 | 139401914 | NOTCH1 | 693_selected_genes |
| chr9  | 139402381 | 139402616 | NOTCH1 | 693_selected_genes |
| chr9  | 139402658 | 139402862 | NOTCH1 | 693_selected_genes |
| chr9  | 139403296 | 139403548 | NOTCH1 | 693_selected_genes |
| chr9  | 139404159 | 139404438 | NOTCH1 | 693_selected_genes |
| chr9  | 139405079 | 139405282 | NOTCH1 | 693_selected_genes |
| chr9  | 139405578 | 139405748 | NOTCH1 | 693_selected_genes |
| chr9  | 139407447 | 139407611 | NOTCH1 | 693_selected_genes |
| chr9  | 139407818 | 139408014 | NOTCH1 | 693_selected_genes |
| chr9  | 139408936 | 139409179 | NOTCH1 | 693_selected_genes |
| chr9  | 139409716 | 139409877 | NOTCH1 | 693_selected_genes |
| chr9  | 139409909 | 139410193 | NOTCH1 | 693_selected_genes |
| chr9  | 139410407 | 139410571 | NOTCH1 | 693_selected_genes |
| chr9  | 139411698 | 139411862 | NOTCH1 | 693_selected_genes |
| chr9  | 139412178 | 139412414 | NOTCH1 | 693_selected_genes |
| chr9  | 139412563 | 139412769 | NOTCH1 | 693_selected_genes |
| chr9  | 139413017 | 139413301 | NOTCH1 | 693_selected_genes |
| chr9  | 139413869 | 139414042 | NOTCH1 | 693_selected_genes |
| chr9  | 139417276 | 139417665 | NOTCH1 | 693_selected_genes |
| chr9  | 139418143 | 139418456 | NOTCH1 | 693_selected_genes |
| chr9  | 139438450 | 139438579 | NOTCH1 | 693_selected_genes |
| chr9  | 139440152 | 139440263 | NOTCH1 | 693_selected_genes |
| chr1  | 120457903 | 120459342 | NOTCH2 | 693_selected_genes |
| chr1  | 120460262 | 120460410 | NOTCH2 | 693_selected_genes |
| chr1  | 120461003 | 120461201 | NOTCH2 | 693_selected_genes |
| chr1  | 120461909 | 120462261 | NOTCH2 | 693_selected_genes |
| chr1  | 120462826 | 120463045 | NOTCH2 | 693_selected_genes |
| chr1  | 120464310 | 120464457 | NOTCH2 | 693_selected_genes |
| chr1  | 120464833 | 120465094 | NOTCH2 | 693_selected_genes |
| chr1  | 120465233 | 120465426 | NOTCH2 | 693_selected_genes |
| chr1  | 120466234 | 120466632 | NOTCH2 | 693_selected_genes |
| chr1  | 120467902 | 120468458 | NOTCH2 | 693_selected_genes |
| chr1  | 120469096 | 120469259 | NOTCH2 | 693_selected_genes |
| chr1  | 120471573 | 120471860 | NOTCH2 | 693_selected_genes |
| chr1  | 120478016 | 120478252 | NOTCH2 | 693_selected_genes |
| chr1  | 120479879 | 120480114 | NOTCH2 | 693_selected_genes |
| chr1  | 120480454 | 120480658 | NOTCH2 | 693_selected_genes |
| chr1  | 120483152 | 120483404 | NOTCH2 | 693_selected_genes |
| chr1  | 120484123 | 120484402 | NOTCH2 | 693_selected_genes |
| chr1  | 120491011 | 120491214 | NOTCH2 | 693_selected_genes |
| chr1  | 120491604 | 120491774 | NOTCH2 | 693_selected_genes |
| chr1  | 120493321 | 120493485 | NOTCH2 | 693_selected_genes |
| chr1  | 120496140 | 120496336 | NOTCH2 | 693_selected_genes |
| chr1  | 120497637 | 120497880 | NOTCH2 | 693_selected_genes |
| chr1  | 120501989 | 120502150 | NOTCH2 | 693_selected_genes |
| chr1  | 120506171 | 120506455 | NOTCH2 | 693_selected_genes |
| chr1  | 120508050 | 120508214 | NOTCH2 | 693_selected_genes |
| chr1  | 120508973 | 120509137 | NOTCH2 | 693_selected_genes |
| chr1  | 120510030 | 120510269 | NOTCH2 | 693_selected_genes |
| chr1  | 120510674 | 120510880 | NOTCH2 | 693_selected_genes |
| chr1  | 120512108 | 120512392 | NOTCH2 | 693_selected_genes |
| chr1  | 120529557 | 120529730 | NOTCH2 | 693_selected_genes |
| chr1  | 120539270 | 120539394 | NOTCH2 | 693_selected_genes |
| chr1  | 120539594 | 120539980 | NOTCH2 | 693_selected_genes |
| chr1  | 120547926 | 120548236 | NOTCH2 | 693_selected_genes |
| chr1  | 120572503 | 120572635 | NOTCH2 | 693_selected_genes |
| chr1  | 120611922 | 120612045 | NOTCH2 | 693_selected_genes |
| chr19 | 15271447  | 15272550  | NOTCH3 | 693_selected_genes |
| chr19 | 15273145  | 15273398  | NOTCH3 | 693_selected_genes |
| chr19 | 15276153  | 15276351  | NOTCH3 | 693_selected_genes |
| chr19 | 15276572  | 15276927  | NOTCH3 | 693_selected_genes |
| chr19 | 15278034  | 15278247  | NOTCH3 | 693_selected_genes |
| chr19 | 15280871  | 15281006  | NOTCH3 | 693_selected_genes |
| chr19 | 15281116  | 15281389  | NOTCH3 | 693_selected_genes |
| chr19 | 15281456  | 15281661  | NOTCH3 | 693_selected_genes |

|       |           |           |        |                    |
|-------|-----------|-----------|--------|--------------------|
| chr19 | 15284853  | 15285236  | NOTCH3 | 693_selected_genes |
| chr19 | 15288310  | 15288926  | NOTCH3 | 693_selected_genes |
| chr19 | 15289608  | 15289777  | NOTCH3 | 693_selected_genes |
| chr19 | 15289810  | 15290118  | NOTCH3 | 693_selected_genes |
| chr19 | 15290149  | 15290332  | NOTCH3 | 693_selected_genes |
| chr19 | 15290857  | 15291092  | NOTCH3 | 693_selected_genes |
| chr19 | 15291466  | 15291664  | NOTCH3 | 693_selected_genes |
| chr19 | 15291746  | 15291998  | NOTCH3 | 693_selected_genes |
| chr19 | 15292361  | 15292637  | NOTCH3 | 693_selected_genes |
| chr19 | 15295080  | 15295286  | NOTCH3 | 693_selected_genes |
| chr19 | 15295691  | 15295855  | NOTCH3 | 693_selected_genes |
| chr19 | 15296042  | 15296244  | NOTCH3 | 693_selected_genes |
| chr19 | 15296272  | 15296515  | NOTCH3 | 693_selected_genes |
| chr19 | 15297663  | 15297824  | NOTCH3 | 693_selected_genes |
| chr19 | 15297890  | 15298174  | NOTCH3 | 693_selected_genes |
| chr19 | 15298666  | 15298830  | NOTCH3 | 693_selected_genes |
| chr19 | 15299020  | 15299184  | NOTCH3 | 693_selected_genes |
| chr19 | 15299774  | 15300010  | NOTCH3 | 693_selected_genes |
| chr19 | 15300058  | 15300264  | NOTCH3 | 693_selected_genes |
| chr19 | 15302209  | 15302493  | NOTCH3 | 693_selected_genes |
| chr19 | 15302530  | 15302703  | NOTCH3 | 693_selected_genes |
| chr19 | 15302745  | 15303134  | NOTCH3 | 693_selected_genes |
| chr19 | 15303162  | 15303355  | NOTCH3 | 693_selected_genes |
| chr19 | 15308285  | 15308414  | NOTCH3 | 693_selected_genes |
| chr19 | 15311573  | 15311741  | NOTCH3 | 693_selected_genes |
| chr6  | 32163188  | 32163952  | NOTCH4 | 693_selected_genes |
| chr6  | 32164075  | 32164223  | NOTCH4 | 693_selected_genes |
| chr6  | 32164676  | 32164874  | NOTCH4 | 693_selected_genes |
| chr6  | 32165050  | 32165396  | NOTCH4 | 693_selected_genes |
| chr6  | 32166172  | 32166361  | NOTCH4 | 693_selected_genes |
| chr6  | 32166400  | 32166532  | NOTCH4 | 693_selected_genes |
| chr6  | 32166677  | 32166947  | NOTCH4 | 693_selected_genes |
| chr6  | 32168582  | 32168808  | NOTCH4 | 693_selected_genes |
| chr6  | 32168868  | 32169302  | NOTCH4 | 693_selected_genes |
| chr6  | 32169827  | 32170401  | NOTCH4 | 693_selected_genes |
| chr6  | 32171521  | 32171684  | NOTCH4 | 693_selected_genes |
| chr6  | 32171888  | 32172191  | NOTCH4 | 693_selected_genes |
| chr6  | 32178503  | 32178738  | NOTCH4 | 693_selected_genes |
| chr6  | 32180225  | 32180429  | NOTCH4 | 693_selected_genes |
| chr6  | 32180575  | 32180713  | NOTCH4 | 693_selected_genes |
| chr6  | 32180886  | 32181054  | NOTCH4 | 693_selected_genes |
| chr6  | 32181439  | 32181642  | NOTCH4 | 693_selected_genes |
| chr6  | 32181861  | 32182057  | NOTCH4 | 693_selected_genes |
| chr6  | 32182977  | 32183187  | NOTCH4 | 693_selected_genes |
| chr6  | 32184696  | 32184869  | NOTCH4 | 693_selected_genes |
| chr6  | 32184904  | 32185068  | NOTCH4 | 693_selected_genes |
| chr6  | 32185746  | 32185910  | NOTCH4 | 693_selected_genes |
| chr6  | 32187343  | 32187588  | NOTCH4 | 693_selected_genes |
| chr6  | 32187880  | 32188086  | NOTCH4 | 693_selected_genes |
| chr6  | 32188156  | 32188443  | NOTCH4 | 693_selected_genes |
| chr6  | 32188507  | 32188680  | NOTCH4 | 693_selected_genes |
| chr6  | 32188729  | 32189127  | NOTCH4 | 693_selected_genes |
| chr6  | 32190262  | 32190608  | NOTCH4 | 693_selected_genes |
| chr6  | 32190756  | 32190888  | NOTCH4 | 693_selected_genes |
| chr6  | 32191607  | 32191730  | NOTCH4 | 693_selected_genes |
| chr5  | 170814927 | 170815035 | NPM1   | 693_selected_genes |
| chr5  | 170817029 | 170817159 | NPM1   | 693_selected_genes |
| chr5  | 170818283 | 170818453 | NPM1   | 693_selected_genes |
| chr5  | 170818684 | 170818828 | NPM1   | 693_selected_genes |
| chr5  | 170819688 | 170819845 | NPM1   | 693_selected_genes |
| chr5  | 170819892 | 170820007 | NPM1   | 693_selected_genes |
| chr5  | 170827131 | 170827239 | NPM1   | 693_selected_genes |
| chr5  | 170827817 | 170827954 | NPM1   | 693_selected_genes |
| chr5  | 170832280 | 170832432 | NPM1   | 693_selected_genes |
| chr5  | 170833375 | 170833434 | NPM1   | 693_selected_genes |
| chr5  | 170834678 | 170834803 | NPM1   | 693_selected_genes |
| chr5  | 170837505 | 170837594 | NPM1   | 693_selected_genes |
| chr16 | 69740887  | 69741135  | NQO1   | 693_selected_genes |
| chr16 | 69744853  | 69745209  | NQO1   | 693_selected_genes |
| chr16 | 69746905  | 69747057  | NQO1   | 693_selected_genes |
| chr16 | 69748841  | 69749005  | NQO1   | 693_selected_genes |
| chr16 | 69752000  | 69752181  | NQO1   | 693_selected_genes |
| chr16 | 69752247  | 69752462  | NQO1   | 693_selected_genes |
| chr16 | 69760310  | 69760367  | NQO1   | 693_selected_genes |
| chr2  | 157182230 | 157182537 | NR4A2  | 693_selected_genes |
| chr2  | 157182636 | 157182865 | NR4A2  | 693_selected_genes |
| chr2  | 157183204 | 157183457 | NR4A2  | 693_selected_genes |
| chr2  | 157184337 | 157184551 | NR4A2  | 693_selected_genes |
| chr2  | 157184890 | 157185070 | NR4A2  | 693_selected_genes |
| chr2  | 157185809 | 157186725 | NR4A2  | 693_selected_genes |
| chr2  | 157188966 | 157189047 | NR4A2  | 693_selected_genes |
| chr1  | 115251130 | 115251300 | NRAS   | 693_selected_genes |
| chr1  | 115252164 | 115252374 | NRAS   | 693_selected_genes |
| chr1  | 115256395 | 115256624 | NRAS   | 693_selected_genes |

|       |           |           |       |                    |
|-------|-----------|-----------|-------|--------------------|
| chr1  | 115258645 | 115258806 | NRAS  | 693_selected_genes |
| chr5  | 176562079 | 176563056 | NSD1  | 693_selected_genes |
| chr5  | 176563848 | 176563982 | NSD1  | 693_selected_genes |
| chr5  | 176618859 | 176619045 | NSD1  | 693_selected_genes |
| chr5  | 176631095 | 176631318 | NSD1  | 693_selected_genes |
| chr5  | 176636611 | 176639221 | NSD1  | 693_selected_genes |
| chr5  | 176656740 | 176656900 | NSD1  | 693_selected_genes |
| chr5  | 176662796 | 176662971 | NSD1  | 693_selected_genes |
| chr5  | 176665212 | 176665533 | NSD1  | 693_selected_genes |
| chr5  | 176666731 | 176666891 | NSD1  | 693_selected_genes |
| chr5  | 176671170 | 176671296 | NSD1  | 693_selected_genes |
| chr5  | 176673653 | 176673822 | NSD1  | 693_selected_genes |
| chr5  | 176675156 | 176675350 | NSD1  | 693_selected_genes |
| chr5  | 176678705 | 176678879 | NSD1  | 693_selected_genes |
| chr5  | 176683926 | 176684177 | NSD1  | 693_selected_genes |
| chr5  | 176686964 | 176687194 | NSD1  | 693_selected_genes |
| chr5  | 176694537 | 176694744 | NSD1  | 693_selected_genes |
| chr5  | 176696577 | 176696833 | NSD1  | 693_selected_genes |
| chr5  | 176700647 | 176700810 | NSD1  | 693_selected_genes |
| chr5  | 176707540 | 176707860 | NSD1  | 693_selected_genes |
| chr5  | 176709440 | 176709607 | NSD1  | 693_selected_genes |
| chr5  | 176710762 | 176710954 | NSD1  | 693_selected_genes |
| chr5  | 176715794 | 176715951 | NSD1  | 693_selected_genes |
| chr5  | 176718929 | 176719184 | NSD1  | 693_selected_genes |
| chr5  | 176720807 | 176722485 | NSD1  | 693_selected_genes |
| chr12 | 96052836  | 96053023  | NTN4  | 693_selected_genes |
| chr12 | 96059560  | 96059781  | NTN4  | 693_selected_genes |
| chr12 | 96063828  | 96063947  | NTN4  | 693_selected_genes |
| chr12 | 96076457  | 96076623  | NTN4  | 693_selected_genes |
| chr12 | 96077248  | 96077512  | NTN4  | 693_selected_genes |
| chr12 | 96104193  | 96104432  | NTN4  | 693_selected_genes |
| chr12 | 96106964  | 96107141  | NTN4  | 693_selected_genes |
| chr12 | 96131618  | 96131947  | NTN4  | 693_selected_genes |
| chr12 | 96180691  | 96181271  | NTN4  | 693_selected_genes |
| chr12 | 96184007  | 96184112  | NTN4  | 693_selected_genes |
| chr1  | 156785596 | 156785655 | NTRK1 | 693_selected_genes |
| chr1  | 156811847 | 156812010 | NTRK1 | 693_selected_genes |
| chr1  | 156830701 | 156830963 | NTRK1 | 693_selected_genes |
| chr1  | 156834120 | 156834245 | NTRK1 | 693_selected_genes |
| chr1  | 156834494 | 156834616 | NTRK1 | 693_selected_genes |
| chr1  | 156836676 | 156836795 | NTRK1 | 693_selected_genes |
| chr1  | 156837870 | 156838066 | NTRK1 | 693_selected_genes |
| chr1  | 156838271 | 156838464 | NTRK1 | 693_selected_genes |
| chr1  | 156841389 | 156841572 | NTRK1 | 693_selected_genes |
| chr1  | 156843399 | 156843776 | NTRK1 | 693_selected_genes |
| chr1  | 156844149 | 156844217 | NTRK1 | 693_selected_genes |
| chr1  | 156844337 | 156844443 | NTRK1 | 693_selected_genes |
| chr1  | 156844672 | 156844825 | NTRK1 | 693_selected_genes |
| chr1  | 156845286 | 156845483 | NTRK1 | 693_selected_genes |
| chr1  | 156845837 | 156846027 | NTRK1 | 693_selected_genes |
| chr1  | 156846166 | 156846389 | NTRK1 | 693_selected_genes |
| chr1  | 156848888 | 156849179 | NTRK1 | 693_selected_genes |
| chr1  | 156849765 | 156849974 | NTRK1 | 693_selected_genes |
| chr1  | 156851223 | 156851459 | NTRK1 | 693_selected_genes |
| chr9  | 87285638  | 87285900  | NTRK2 | 693_selected_genes |
| chr9  | 87317048  | 87317173  | NTRK2 | 693_selected_genes |
| chr9  | 87317237  | 87317359  | NTRK2 | 693_selected_genes |
| chr9  | 87322733  | 87322852  | NTRK2 | 693_selected_genes |
| chr9  | 87325526  | 87325731  | NTRK2 | 693_selected_genes |
| chr9  | 87338462  | 87338649  | NTRK2 | 693_selected_genes |
| chr9  | 87339113  | 87339296  | NTRK2 | 693_selected_genes |
| chr9  | 87342543  | 87342899  | NTRK2 | 693_selected_genes |
| chr9  | 87356781  | 87356867  | NTRK2 | 693_selected_genes |
| chr9  | 87359862  | 87360013  | NTRK2 | 693_selected_genes |
| chr9  | 87366875  | 87367025  | NTRK2 | 693_selected_genes |
| chr9  | 87425431  | 87425519  | NTRK2 | 693_selected_genes |
| chr9  | 87475929  | 87476027  | NTRK2 | 693_selected_genes |
| chr9  | 87482132  | 87482371  | NTRK2 | 693_selected_genes |
| chr9  | 87486678  | 87486757  | NTRK2 | 693_selected_genes |
| chr9  | 87549051  | 87549232  | NTRK2 | 693_selected_genes |
| chr9  | 87563351  | 87563574  | NTRK2 | 693_selected_genes |
| chr9  | 87570172  | 87570457  | NTRK2 | 693_selected_genes |
| chr9  | 87635095  | 87635304  | NTRK2 | 693_selected_genes |
| chr9  | 87636141  | 87636377  | NTRK2 | 693_selected_genes |
| chr15 | 88420140  | 88420376  | NTRK3 | 693_selected_genes |
| chr15 | 88423475  | 88423684  | NTRK3 | 693_selected_genes |
| chr15 | 88428899  | 88428991  | NTRK3 | 693_selected_genes |
| chr15 | 88459744  | 88459816  | NTRK3 | 693_selected_genes |
| chr15 | 88468775  | 88468920  | NTRK3 | 693_selected_genes |
| chr15 | 88472387  | 88472690  | NTRK3 | 693_selected_genes |
| chr15 | 88476217  | 88476440  | NTRK3 | 693_selected_genes |
| chr15 | 88483828  | 88484009  | NTRK3 | 693_selected_genes |
| chr15 | 88522550  | 88522719  | NTRK3 | 693_selected_genes |
| chr15 | 88524431  | 88524616  | NTRK3 | 693_selected_genes |

|       |          |          |       |                    |
|-------|----------|----------|-------|--------------------|
| chr15 | 88576062 | 88576301 | NTRK3 | 693_selected_genes |
| chr15 | 88615756 | 88615855 | NTRK3 | 693_selected_genes |
| chr15 | 88669476 | 88669629 | NTRK3 | 693_selected_genes |
| chr15 | 88670367 | 88670482 | NTRK3 | 693_selected_genes |
| chr15 | 88671916 | 88671990 | NTRK3 | 693_selected_genes |
| chr15 | 88678306 | 88678653 | NTRK3 | 693_selected_genes |
| chr15 | 88679104 | 88679296 | NTRK3 | 693_selected_genes |
| chr15 | 88679672 | 88679865 | NTRK3 | 693_selected_genes |
| chr15 | 88680609 | 88680817 | NTRK3 | 693_selected_genes |
| chr15 | 88690540 | 88690659 | NTRK3 | 693_selected_genes |
| chr15 | 88726623 | 88726745 | NTRK3 | 693_selected_genes |
| chr15 | 88727430 | 88727555 | NTRK3 | 693_selected_genes |
| chr15 | 88799111 | 88799409 | NTRK3 | 693_selected_genes |
| chr11 | 71714547 | 71714609 | NUMA1 | 693_selected_genes |
| chr11 | 71714907 | 71715170 | NUMA1 | 693_selected_genes |
| chr11 | 71715245 | 71715412 | NUMA1 | 693_selected_genes |
| chr11 | 71715660 | 71715887 | NUMA1 | 693_selected_genes |
| chr11 | 71716253 | 71716440 | NUMA1 | 693_selected_genes |
| chr11 | 71717055 | 71717334 | NUMA1 | 693_selected_genes |
| chr11 | 71718209 | 71718506 | NUMA1 | 693_selected_genes |
| chr11 | 71719112 | 71719216 | NUMA1 | 693_selected_genes |
| chr11 | 71719632 | 71719916 | NUMA1 | 693_selected_genes |
| chr11 | 71719987 | 71720256 | NUMA1 | 693_selected_genes |
| chr11 | 71720288 | 71720458 | NUMA1 | 693_selected_genes |
| chr11 | 71721806 | 71721925 | NUMA1 | 693_selected_genes |
| chr11 | 71723421 | 71723513 | NUMA1 | 693_selected_genes |
| chr11 | 71723915 | 71727331 | NUMA1 | 693_selected_genes |
| chr11 | 71727428 | 71727601 | NUMA1 | 693_selected_genes |
| chr11 | 71728707 | 71728898 | NUMA1 | 693_selected_genes |
| chr11 | 71729203 | 71729371 | NUMA1 | 693_selected_genes |
| chr11 | 71729416 | 71729584 | NUMA1 | 693_selected_genes |
| chr11 | 71729843 | 71730051 | NUMA1 | 693_selected_genes |
| chr11 | 71730514 | 71730688 | NUMA1 | 693_selected_genes |
| chr11 | 71732224 | 71732362 | NUMA1 | 693_selected_genes |
| chr11 | 71733359 | 71733490 | NUMA1 | 693_selected_genes |
| chr11 | 71734085 | 71734218 | NUMA1 | 693_selected_genes |
| chr11 | 71735294 | 71735424 | NUMA1 | 693_selected_genes |
| chr11 | 71740225 | 71740361 | NUMA1 | 693_selected_genes |
| chr11 | 71746922 | 71747014 | NUMA1 | 693_selected_genes |
| chr16 | 56782134 | 56782363 | NUP93 | 693_selected_genes |
| chr16 | 56792424 | 56792592 | NUP93 | 693_selected_genes |
| chr16 | 56832362 | 56832475 | NUP93 | 693_selected_genes |
| chr16 | 56839390 | 56839578 | NUP93 | 693_selected_genes |
| chr16 | 56852550 | 56852675 | NUP93 | 693_selected_genes |
| chr16 | 56855390 | 56855530 | NUP93 | 693_selected_genes |
| chr16 | 56857593 | 56857783 | NUP93 | 693_selected_genes |
| chr16 | 56862863 | 56863046 | NUP93 | 693_selected_genes |
| chr16 | 56864414 | 56864622 | NUP93 | 693_selected_genes |
| chr16 | 56865728 | 56865944 | NUP93 | 693_selected_genes |
| chr16 | 56866181 | 56866325 | NUP93 | 693_selected_genes |
| chr16 | 56867101 | 56867343 | NUP93 | 693_selected_genes |
| chr16 | 56868014 | 56868191 | NUP93 | 693_selected_genes |
| chr16 | 56868256 | 56868379 | NUP93 | 693_selected_genes |
| chr16 | 56868620 | 56868715 | NUP93 | 693_selected_genes |
| chr16 | 56870487 | 56870654 | NUP93 | 693_selected_genes |
| chr16 | 56871494 | 56871663 | NUP93 | 693_selected_genes |
| chr16 | 56872838 | 56873030 | NUP93 | 693_selected_genes |
| chr16 | 56873407 | 56873658 | NUP93 | 693_selected_genes |
| chr16 | 56875591 | 56875770 | NUP93 | 693_selected_genes |
| chr16 | 56876464 | 56876632 | NUP93 | 693_selected_genes |
| chr16 | 56878385 | 56878611 | NUP93 | 693_selected_genes |
| chr11 | 3692586  | 3692671  | NUP98 | 693_selected_genes |
| chr11 | 3697363  | 3697631  | NUP98 | 693_selected_genes |
| chr11 | 3697713  | 3697875  | NUP98 | 693_selected_genes |
| chr11 | 3697892  | 3697954  | NUP98 | 693_selected_genes |
| chr11 | 3700644  | 3700702  | NUP98 | 693_selected_genes |
| chr11 | 3700758  | 3700963  | NUP98 | 693_selected_genes |
| chr11 | 3704404  | 3704696  | NUP98 | 693_selected_genes |
| chr11 | 3707177  | 3707449  | NUP98 | 693_selected_genes |
| chr11 | 3712551  | 3712744  | NUP98 | 693_selected_genes |
| chr11 | 3714436  | 3714630  | NUP98 | 693_selected_genes |
| chr11 | 3716653  | 3716861  | NUP98 | 693_selected_genes |
| chr11 | 3720286  | 3720603  | NUP98 | 693_selected_genes |
| chr11 | 3721814  | 3722094  | NUP98 | 693_selected_genes |
| chr11 | 3723663  | 3724147  | NUP98 | 693_selected_genes |
| chr11 | 3726404  | 3726611  | NUP98 | 693_selected_genes |
| chr11 | 3727649  | 3727882  | NUP98 | 693_selected_genes |
| chr11 | 3733747  | 3733983  | NUP98 | 693_selected_genes |
| chr11 | 3735022  | 3735250  | NUP98 | 693_selected_genes |
| chr11 | 3740616  | 3740805  | NUP98 | 693_selected_genes |
| chr11 | 3741916  | 3742080  | NUP98 | 693_selected_genes |
| chr11 | 3744361  | 3744710  | NUP98 | 693_selected_genes |
| chr11 | 3746307  | 3746474  | NUP98 | 693_selected_genes |
| chr11 | 3752594  | 3752833  | NUP98 | 693_selected_genes |

|       |           |           |        |                    |
|-------|-----------|-----------|--------|--------------------|
| chr11 | 3756395   | 3756579   | NUP98  | 693_selected_genes |
| chr11 | 3765713   | 3765904   | NUP98  | 693_selected_genes |
| chr11 | 3774520   | 3774663   | NUP98  | 693_selected_genes |
| chr11 | 3781660   | 3781881   | NUP98  | 693_selected_genes |
| chr11 | 3784106   | 3784294   | NUP98  | 693_selected_genes |
| chr11 | 3789785   | 3789999   | NUP98  | 693_selected_genes |
| chr11 | 3792952   | 3793183   | NUP98  | 693_selected_genes |
| chr11 | 3794836   | 3794994   | NUP98  | 693_selected_genes |
| chr11 | 3797086   | 3797276   | NUP98  | 693_selected_genes |
| chr11 | 3800077   | 3800304   | NUP98  | 693_selected_genes |
| chr11 | 3800360   | 3800512   | NUP98  | 693_selected_genes |
| chr11 | 3803246   | 3803372   | NUP98  | 693_selected_genes |
| chr15 | 34635808  | 34635928  | NUTM1  | 693_selected_genes |
| chr15 | 34638117  | 34638261  | NUTM1  | 693_selected_genes |
| chr15 | 34640144  | 34640903  | NUTM1  | 693_selected_genes |
| chr15 | 34642879  | 34643058  | NUTM1  | 693_selected_genes |
| chr15 | 34645911  | 34646098  | NUTM1  | 693_selected_genes |
| chr15 | 34646621  | 34646958  | NUTM1  | 693_selected_genes |
| chr15 | 34647196  | 34647363  | NUTM1  | 693_selected_genes |
| chr15 | 34647663  | 34649717  | NUTM1  | 693_selected_genes |
| chr11 | 59210616  | 59211614  | OR5A1  | 693_selected_genes |
| chrX  | 38211924  | 38212051  | OTC    | 693_selected_genes |
| chrX  | 38226518  | 38226707  | OTC    | 693_selected_genes |
| chrX  | 38229023  | 38229155  | OTC    | 693_selected_genes |
| chrX  | 38240569  | 38240707  | OTC    | 693_selected_genes |
| chrX  | 38260502  | 38260706  | OTC    | 693_selected_genes |
| chrX  | 38262845  | 38263018  | OTC    | 693_selected_genes |
| chrX  | 38267969  | 38268073  | OTC    | 693_selected_genes |
| chrX  | 38268103  | 38268303  | OTC    | 693_selected_genes |
| chrX  | 38271089  | 38271277  | OTC    | 693_selected_genes |
| chrX  | 38280250  | 38280360  | OTC    | 693_selected_genes |
| chr8  | 101716500 | 101716643 | PABPC1 | 693_selected_genes |
| chr8  | 101717128 | 101717309 | PABPC1 | 693_selected_genes |
| chr8  | 101717791 | 101717926 | PABPC1 | 693_selected_genes |
| chr8  | 101718853 | 101719058 | PABPC1 | 693_selected_genes |
| chr8  | 101719089 | 101719250 | PABPC1 | 693_selected_genes |
| chr8  | 101721335 | 101721476 | PABPC1 | 693_selected_genes |
| chr8  | 101721661 | 101721984 | PABPC1 | 693_selected_genes |
| chr8  | 101724564 | 101724710 | PABPC1 | 693_selected_genes |
| chr8  | 101724854 | 101725042 | PABPC1 | 693_selected_genes |
| chr8  | 101725289 | 101725434 | PABPC1 | 693_selected_genes |
| chr8  | 101727664 | 101727854 | PABPC1 | 693_selected_genes |
| chr8  | 101729975 | 101730143 | PABPC1 | 693_selected_genes |
| chr8  | 101730289 | 101730533 | PABPC1 | 693_selected_genes |
| chr8  | 101733593 | 101733836 | PABPC1 | 693_selected_genes |
| chr11 | 77034156  | 77034224  | PAK1   | 693_selected_genes |
| chr11 | 77034293  | 77034430  | PAK1   | 693_selected_genes |
| chr11 | 77036347  | 77036446  | PAK1   | 693_selected_genes |
| chr11 | 77040314  | 77040382  | PAK1   | 693_selected_genes |
| chr11 | 77043749  | 77043937  | PAK1   | 693_selected_genes |
| chr11 | 77047105  | 77047352  | PAK1   | 693_selected_genes |
| chr11 | 77048343  | 77048493  | PAK1   | 693_selected_genes |
| chr11 | 77051665  | 77051833  | PAK1   | 693_selected_genes |
| chr11 | 77054838  | 77055001  | PAK1   | 693_selected_genes |
| chr11 | 77058054  | 77058142  | PAK1   | 693_selected_genes |
| chr11 | 77060258  | 77060357  | PAK1   | 693_selected_genes |
| chr11 | 77064555  | 77064669  | PAK1   | 693_selected_genes |
| chr11 | 77066687  | 77066912  | PAK1   | 693_selected_genes |
| chr11 | 77069917  | 77070087  | PAK1   | 693_selected_genes |
| chr11 | 77085347  | 77085435  | PAK1   | 693_selected_genes |
| chr11 | 77090260  | 77090458  | PAK1   | 693_selected_genes |
| chr11 | 77090913  | 77091064  | PAK1   | 693_selected_genes |
| chr11 | 77103350  | 77103590  | PAK1   | 693_selected_genes |
| chrX  | 110366306 | 110366531 | PAK3   | 693_selected_genes |
| chrX  | 110385298 | 110385449 | PAK3   | 693_selected_genes |
| chrX  | 110388062 | 110388175 | PAK3   | 693_selected_genes |
| chrX  | 110389723 | 110389818 | PAK3   | 693_selected_genes |
| chrX  | 110390939 | 110391143 | PAK3   | 693_selected_genes |
| chrX  | 110395612 | 110395700 | PAK3   | 693_selected_genes |
| chrX  | 110406117 | 110406299 | PAK3   | 693_selected_genes |
| chrX  | 110406764 | 110406980 | PAK3   | 693_selected_genes |
| chrX  | 110416220 | 110416334 | PAK3   | 693_selected_genes |
| chrX  | 110435329 | 110435428 | PAK3   | 693_selected_genes |
| chrX  | 110435708 | 110435871 | PAK3   | 693_selected_genes |
| chrX  | 110437503 | 110437671 | PAK3   | 693_selected_genes |
| chrX  | 110439044 | 110439194 | PAK3   | 693_selected_genes |
| chrX  | 110439646 | 110439893 | PAK3   | 693_selected_genes |
| chrX  | 110459623 | 110459811 | PAK3   | 693_selected_genes |
| chrX  | 110463560 | 110463700 | PAK3   | 693_selected_genes |
| chr20 | 9520083   | 9520289   | PAK7   | 693_selected_genes |
| chr20 | 9523207   | 9523392   | PAK7   | 693_selected_genes |
| chr20 | 9524990   | 9525166   | PAK7   | 693_selected_genes |
| chr20 | 9538229   | 9538406   | PAK7   | 693_selected_genes |
| chr20 | 9543512   | 9543696   | PAK7   | 693_selected_genes |

|       |           |           |       |                    |
|-------|-----------|-----------|-------|--------------------|
| chr20 | 9546514   | 9547056   | PAK7  | 693_selected_genes |
| chr20 | 9560766   | 9561602   | PAK7  | 693_selected_genes |
| chr20 | 9624747   | 9625001   | PAK7  | 693_selected_genes |
| chr16 | 23614754  | 23615015  | PALB2 | 693_selected_genes |
| chr16 | 23619159  | 23619358  | PALB2 | 693_selected_genes |
| chr16 | 23625299  | 23625437  | PALB2 | 693_selected_genes |
| chr16 | 23632657  | 23632824  | PALB2 | 693_selected_genes |
| chr16 | 23634264  | 23634476  | PALB2 | 693_selected_genes |
| chr16 | 23635304  | 23635440  | PALB2 | 693_selected_genes |
| chr16 | 23637531  | 23637743  | PALB2 | 693_selected_genes |
| chr16 | 23640499  | 23640621  | PALB2 | 693_selected_genes |
| chr16 | 23640935  | 23641815  | PALB2 | 693_selected_genes |
| chr16 | 23646157  | 23647680  | PALB2 | 693_selected_genes |
| chr16 | 23649145  | 23649298  | PALB2 | 693_selected_genes |
| chr16 | 23649365  | 23649475  | PALB2 | 693_selected_genes |
| chr16 | 23649852  | 23649938  | PALB2 | 693_selected_genes |
| chr16 | 23651547  | 23651651  | PALB2 | 693_selected_genes |
| chr16 | 23652405  | 23652503  | PALB2 | 693_selected_genes |
| chr6  | 161771105 | 161771268 | PARK2 | 693_selected_genes |
| chr6  | 161781094 | 161781262 | PARK2 | 693_selected_genes |
| chr6  | 161807800 | 161807934 | PARK2 | 693_selected_genes |
| chr6  | 161966420 | 161966494 | PARK2 | 693_selected_genes |
| chr6  | 161969860 | 161970060 | PARK2 | 693_selected_genes |
| chr6  | 161990361 | 161990473 | PARK2 | 693_selected_genes |
| chr6  | 162206778 | 162206965 | PARK2 | 693_selected_genes |
| chr6  | 162394308 | 162394474 | PARK2 | 693_selected_genes |
| chr6  | 162475097 | 162475231 | PARK2 | 693_selected_genes |
| chr6  | 162622137 | 162622309 | PARK2 | 693_selected_genes |
| chr6  | 162683531 | 162683822 | PARK2 | 693_selected_genes |
| chr6  | 162864316 | 162864530 | PARK2 | 693_selected_genes |
| chr6  | 163148668 | 163148725 | PARK2 | 693_selected_genes |
| chr1  | 226549135 | 226549267 | PARP1 | 693_selected_genes |
| chr1  | 226549644 | 226549809 | PARP1 | 693_selected_genes |
| chr1  | 226550774 | 226550886 | PARP1 | 693_selected_genes |
| chr1  | 226551618 | 226551796 | PARP1 | 693_selected_genes |
| chr1  | 226552677 | 226552880 | PARP1 | 693_selected_genes |
| chr1  | 226553629 | 226553778 | PARP1 | 693_selected_genes |
| chr1  | 226555155 | 226555334 | PARP1 | 693_selected_genes |
| chr1  | 226555874 | 226556047 | PARP1 | 693_selected_genes |
| chr1  | 226558109 | 226558243 | PARP1 | 693_selected_genes |
| chr1  | 226561901 | 226562080 | PARP1 | 693_selected_genes |
| chr1  | 226564783 | 226565029 | PARP1 | 693_selected_genes |
| chr1  | 226566817 | 226567000 | PARP1 | 693_selected_genes |
| chr1  | 226567248 | 226567367 | PARP1 | 693_selected_genes |
| chr1  | 226567597 | 226567890 | PARP1 | 693_selected_genes |
| chr1  | 226568743 | 226568934 | PARP1 | 693_selected_genes |
| chr1  | 226570711 | 226570909 | PARP1 | 693_selected_genes |
| chr1  | 226573179 | 226573406 | PARP1 | 693_selected_genes |
| chr1  | 226574001 | 226574168 | PARP1 | 693_selected_genes |
| chr1  | 226576331 | 226576481 | PARP1 | 693_selected_genes |
| chr1  | 226578085 | 226578350 | PARP1 | 693_selected_genes |
| chr1  | 226579874 | 226580040 | PARP1 | 693_selected_genes |
| chr1  | 226580615 | 226580706 | PARP1 | 693_selected_genes |
| chr1  | 226589707 | 226590105 | PARP1 | 693_selected_genes |
| chr1  | 226595485 | 226595655 | PARP1 | 693_selected_genes |
| chr14 | 20811775  | 20811871  | PARP2 | 693_selected_genes |
| chr14 | 20813065  | 20813310  | PARP2 | 693_selected_genes |
| chr14 | 20813527  | 20813648  | PARP2 | 693_selected_genes |
| chr14 | 20814996  | 20815097  | PARP2 | 693_selected_genes |
| chr14 | 20818659  | 20818806  | PARP2 | 693_selected_genes |
| chr14 | 20819180  | 20819306  | PARP2 | 693_selected_genes |
| chr14 | 20820378  | 20820531  | PARP2 | 693_selected_genes |
| chr14 | 20822218  | 20822431  | PARP2 | 693_selected_genes |
| chr14 | 20822942  | 20823131  | PARP2 | 693_selected_genes |
| chr14 | 20823885  | 20823999  | PARP2 | 693_selected_genes |
| chr14 | 20824030  | 20824215  | PARP2 | 693_selected_genes |
| chr14 | 20824440  | 20824618  | PARP2 | 693_selected_genes |
| chr14 | 20824723  | 20824873  | PARP2 | 693_selected_genes |
| chr14 | 20825184  | 20825333  | PARP2 | 693_selected_genes |
| chr14 | 20825529  | 20825708  | PARP2 | 693_selected_genes |
| chr14 | 20825771  | 20825981  | PARP2 | 693_selected_genes |
| chr3  | 51976680  | 51976749  | PARP3 | 693_selected_genes |
| chr3  | 51977339  | 51977579  | PARP3 | 693_selected_genes |
| chr3  | 51978079  | 51978258  | PARP3 | 693_selected_genes |
| chr3  | 51978380  | 51978619  | PARP3 | 693_selected_genes |
| chr3  | 51978768  | 51978951  | PARP3 | 693_selected_genes |
| chr3  | 51978988  | 51979265  | PARP3 | 693_selected_genes |
| chr3  | 51979485  | 51979685  | PARP3 | 693_selected_genes |
| chr3  | 51979843  | 51979980  | PARP3 | 693_selected_genes |
| chr3  | 51980156  | 51980384  | PARP3 | 693_selected_genes |
| chr3  | 51981730  | 51981936  | PARP3 | 693_selected_genes |
| chr3  | 51982301  | 51982521  | PARP3 | 693_selected_genes |
| chr13 | 24995231  | 24995477  | PARP4 | 693_selected_genes |
| chr13 | 25000578  | 25000761  | PARP4 | 693_selected_genes |

|       |           |           |       |                    |
|-------|-----------|-----------|-------|--------------------|
| chr13 | 25005489  | 25005639  | PARP4 | 693_selected_genes |
| chr13 | 25008507  | 25009637  | PARP4 | 693_selected_genes |
| chr13 | 25015958  | 25016131  | PARP4 | 693_selected_genes |
| chr13 | 25016702  | 25016848  | PARP4 | 693_selected_genes |
| chr13 | 25017762  | 25017893  | PARP4 | 693_selected_genes |
| chr13 | 25020793  | 25020924  | PARP4 | 693_selected_genes |
| chr13 | 25021128  | 25021349  | PARP4 | 693_selected_genes |
| chr13 | 25023830  | 25023980  | PARP4 | 693_selected_genes |
| chr13 | 25026518  | 25026756  | PARP4 | 693_selected_genes |
| chr13 | 25027699  | 25027817  | PARP4 | 693_selected_genes |
| chr13 | 25029129  | 25029375  | PARP4 | 693_selected_genes |
| chr13 | 25030453  | 25030641  | PARP4 | 693_selected_genes |
| chr13 | 25033156  | 25033285  | PARP4 | 693_selected_genes |
| chr13 | 25033376  | 25033473  | PARP4 | 693_selected_genes |
| chr13 | 25034084  | 25034299  | PARP4 | 693_selected_genes |
| chr13 | 25043136  | 25043273  | PARP4 | 693_selected_genes |
| chr13 | 25044006  | 25044188  | PARP4 | 693_selected_genes |
| chr13 | 25049584  | 25049759  | PARP4 | 693_selected_genes |
| chr13 | 25051813  | 25052020  | PARP4 | 693_selected_genes |
| chr13 | 25052205  | 25052439  | PARP4 | 693_selected_genes |
| chr13 | 25058765  | 25058911  | PARP4 | 693_selected_genes |
| chr13 | 25060280  | 25060468  | PARP4 | 693_selected_genes |
| chr13 | 25064780  | 25064991  | PARP4 | 693_selected_genes |
| chr13 | 25066533  | 25066757  | PARP4 | 693_selected_genes |
| chr13 | 25067708  | 25067896  | PARP4 | 693_selected_genes |
| chr13 | 25068685  | 25068885  | PARP4 | 693_selected_genes |
| chr13 | 25072228  | 25072392  | PARP4 | 693_selected_genes |
| chr13 | 25073413  | 25073539  | PARP4 | 693_selected_genes |
| chr13 | 25074428  | 25074545  | PARP4 | 693_selected_genes |
| chr13 | 25075745  | 25075997  | PARP4 | 693_selected_genes |
| chr13 | 25077757  | 25077939  | PARP4 | 693_selected_genes |
| chr9  | 36840500  | 36840658  | PAX5  | 693_selected_genes |
| chr9  | 36846814  | 36846951  | PAX5  | 693_selected_genes |
| chr9  | 36881975  | 36882127  | PAX5  | 693_selected_genes |
| chr9  | 36923326  | 36923506  | PAX5  | 693_selected_genes |
| chr9  | 36930859  | 36930966  | PAX5  | 693_selected_genes |
| chr9  | 36966520  | 36966746  | PAX5  | 693_selected_genes |
| chr9  | 37002619  | 37002798  | PAX5  | 693_selected_genes |
| chr9  | 37006444  | 37006559  | PAX5  | 693_selected_genes |
| chr9  | 37014968  | 37015216  | PAX5  | 693_selected_genes |
| chr9  | 37020607  | 37020823  | PAX5  | 693_selected_genes |
| chr9  | 37033957  | 37034053  | PAX5  | 693_selected_genes |
| chr2  | 113976084 | 113976211 | PAX8  | 693_selected_genes |
| chr2  | 113977643 | 113977780 | PAX8  | 693_selected_genes |
| chr2  | 113984650 | 113984858 | PAX8  | 693_selected_genes |
| chr2  | 113992945 | 113993184 | PAX8  | 693_selected_genes |
| chr2  | 113994152 | 113994323 | PAX8  | 693_selected_genes |
| chr2  | 113999102 | 113999381 | PAX8  | 693_selected_genes |
| chr2  | 113999559 | 113999732 | PAX8  | 693_selected_genes |
| chr2  | 114000241 | 114000380 | PAX8  | 693_selected_genes |
| chr2  | 114001978 | 114002226 | PAX8  | 693_selected_genes |
| chr2  | 114004305 | 114004521 | PAX8  | 693_selected_genes |
| chr2  | 114035921 | 114035996 | PAX8  | 693_selected_genes |
| chr3  | 52582053  | 52582276  | PBRM1 | 693_selected_genes |
| chr3  | 52584411  | 52584678  | PBRM1 | 693_selected_genes |
| chr3  | 52584737  | 52584858  | PBRM1 | 693_selected_genes |
| chr3  | 52588714  | 52588920  | PBRM1 | 693_selected_genes |
| chr3  | 52592239  | 52592454  | PBRM1 | 693_selected_genes |
| chr3  | 52595757  | 52596009  | PBRM1 | 693_selected_genes |
| chr3  | 52597273  | 52597534  | PBRM1 | 693_selected_genes |
| chr3  | 52598040  | 52598274  | PBRM1 | 693_selected_genes |
| chr3  | 52610531  | 52610739  | PBRM1 | 693_selected_genes |
| chr3  | 52613044  | 52613240  | PBRM1 | 693_selected_genes |
| chr3  | 52620415  | 52620729  | PBRM1 | 693_selected_genes |
| chr3  | 52621343  | 52621551  | PBRM1 | 693_selected_genes |
| chr3  | 52623060  | 52623296  | PBRM1 | 693_selected_genes |
| chr3  | 52637511  | 52637773  | PBRM1 | 693_selected_genes |
| chr3  | 52643303  | 52643996  | PBRM1 | 693_selected_genes |
| chr3  | 52649341  | 52649497  | PBRM1 | 693_selected_genes |
| chr3  | 52651252  | 52651579  | PBRM1 | 693_selected_genes |
| chr3  | 52658887  | 52658982  | PBRM1 | 693_selected_genes |
| chr3  | 52661263  | 52661411  | PBRM1 | 693_selected_genes |
| chr3  | 52662884  | 52663076  | PBRM1 | 693_selected_genes |
| chr3  | 52668592  | 52668856  | PBRM1 | 693_selected_genes |
| chr3  | 52675944  | 52676086  | PBRM1 | 693_selected_genes |
| chr3  | 52677238  | 52677384  | PBRM1 | 693_selected_genes |
| chr3  | 52678694  | 52678830  | PBRM1 | 693_selected_genes |
| chr3  | 52682334  | 52682483  | PBRM1 | 693_selected_genes |
| chr3  | 52685732  | 52685851  | PBRM1 | 693_selected_genes |
| chr3  | 52692189  | 52692356  | PBRM1 | 693_selected_genes |
| chr3  | 52696123  | 52696317  | PBRM1 | 693_selected_genes |
| chr3  | 52702488  | 52702686  | PBRM1 | 693_selected_genes |
| chr3  | 52712490  | 52712638  | PBRM1 | 693_selected_genes |
| chr3  | 52713564  | 52713752  | PBRM1 | 693_selected_genes |

|       |           |           |        |                    |
|-------|-----------|-----------|--------|--------------------|
| chr2  | 70314850  | 70315971  | PCBP1  | 693_selected_genes |
| chr1  | 55505485  | 55505742  | PCSK9  | 693_selected_genes |
| chr1  | 55509490  | 55509732  | PCSK9  | 693_selected_genes |
| chr1  | 55512170  | 55512344  | PCSK9  | 693_selected_genes |
| chr1  | 55516839  | 55516984  | PCSK9  | 693_selected_genes |
| chr1  | 55517925  | 55518109  | PCSK9  | 693_selected_genes |
| chr1  | 55518297  | 55518489  | PCSK9  | 693_selected_genes |
| chr1  | 55521640  | 55521887  | PCSK9  | 693_selected_genes |
| chr1  | 55522978  | 55523212  | PCSK9  | 693_selected_genes |
| chr1  | 55523683  | 55523907  | PCSK9  | 693_selected_genes |
| chr1  | 55524146  | 55524345  | PCSK9  | 693_selected_genes |
| chr1  | 55525133  | 55525361  | PCSK9  | 693_selected_genes |
| chr1  | 55527022  | 55527254  | PCSK9  | 693_selected_genes |
| chr1  | 55529016  | 55529282  | PCSK9  | 693_selected_genes |
| chr2  | 242793184 | 242793474 | PDCD1  | 693_selected_genes |
| chr2  | 242794075 | 242794160 | PDCD1  | 693_selected_genes |
| chr2  | 242794324 | 242794530 | PDCD1  | 693_selected_genes |
| chr2  | 242794747 | 242795157 | PDCD1  | 693_selected_genes |
| chr2  | 242800889 | 242801015 | PDCD1  | 693_selected_genes |
| chr4  | 55106194  | 55106307  | PDGFRA | 693_selected_genes |
| chr4  | 55124898  | 55125009  | PDGFRA | 693_selected_genes |
| chr4  | 55127236  | 55127604  | PDGFRA | 693_selected_genes |
| chr4  | 55129808  | 55130148  | PDGFRA | 693_selected_genes |
| chr4  | 55131060  | 55131241  | PDGFRA | 693_selected_genes |
| chr4  | 55133430  | 55133652  | PDGFRA | 693_selected_genes |
| chr4  | 55133693  | 55133933  | PDGFRA | 693_selected_genes |
| chr4  | 55136774  | 55136940  | PDGFRA | 693_selected_genes |
| chr4  | 55138535  | 55138712  | PDGFRA | 693_selected_genes |
| chr4  | 55139678  | 55139922  | PDGFRA | 693_selected_genes |
| chr4  | 55140672  | 55140817  | PDGFRA | 693_selected_genes |
| chr4  | 55140982  | 55141165  | PDGFRA | 693_selected_genes |
| chr4  | 55143529  | 55143684  | PDGFRA | 693_selected_genes |
| chr4  | 55144037  | 55144198  | PDGFRA | 693_selected_genes |
| chr4  | 55144503  | 55144707  | PDGFRA | 693_selected_genes |
| chr4  | 55144960  | 55145086  | PDGFRA | 693_selected_genes |
| chr4  | 55146457  | 55146674  | PDGFRA | 693_selected_genes |
| chr4  | 55151512  | 55151678  | PDGFRA | 693_selected_genes |
| chr4  | 55151982  | 55152155  | PDGFRA | 693_selected_genes |
| chr4  | 55153571  | 55153733  | PDGFRA | 693_selected_genes |
| chr4  | 55154940  | 55155090  | PDGFRA | 693_selected_genes |
| chr4  | 55155150  | 55155306  | PDGFRA | 693_selected_genes |
| chr4  | 55156454  | 55156746  | PDGFRA | 693_selected_genes |
| chr4  | 55161266  | 55161464  | PDGFRA | 693_selected_genes |
| chr5  | 149495300 | 149495534 | PDGFRB | 693_selected_genes |
| chr5  | 149497155 | 149497438 | PDGFRB | 693_selected_genes |
| chr5  | 149498284 | 149498440 | PDGFRB | 693_selected_genes |
| chr5  | 149499004 | 149499154 | PDGFRB | 693_selected_genes |
| chr5  | 149499549 | 149499711 | PDGFRB | 693_selected_genes |
| chr5  | 149500425 | 149500598 | PDGFRB | 693_selected_genes |
| chr5  | 149500741 | 149500910 | PDGFRB | 693_selected_genes |
| chr5  | 149501417 | 149501628 | PDGFRB | 693_selected_genes |
| chr5  | 149502579 | 149502789 | PDGFRB | 693_selected_genes |
| chr5  | 149503787 | 149503948 | PDGFRB | 693_selected_genes |
| chr5  | 149504264 | 149504419 | PDGFRB | 693_selected_genes |
| chr5  | 149504982 | 149505165 | PDGFRB | 693_selected_genes |
| chr5  | 149506057 | 149506202 | PDGFRB | 693_selected_genes |
| chr5  | 149509294 | 149509556 | PDGFRB | 693_selected_genes |
| chr5  | 149510076 | 149510250 | PDGFRB | 693_selected_genes |
| chr5  | 149511516 | 149511682 | PDGFRB | 693_selected_genes |
| chr5  | 149512287 | 149512530 | PDGFRB | 693_selected_genes |
| chr5  | 149513123 | 149513348 | PDGFRB | 693_selected_genes |
| chr5  | 149513418 | 149513596 | PDGFRB | 693_selected_genes |
| chr5  | 149514253 | 149514604 | PDGFRB | 693_selected_genes |
| chr5  | 149515092 | 149515466 | PDGFRB | 693_selected_genes |
| chr5  | 149516545 | 149516635 | PDGFRB | 693_selected_genes |
| chr2  | 173420853 | 173421099 | PDK1   | 693_selected_genes |
| chr2  | 173423410 | 173423602 | PDK1   | 693_selected_genes |
| chr2  | 173426922 | 173427044 | PDK1   | 693_selected_genes |
| chr2  | 173427443 | 173427553 | PDK1   | 693_selected_genes |
| chr2  | 173428754 | 173428811 | PDK1   | 693_selected_genes |
| chr2  | 173429205 | 173429440 | PDK1   | 693_selected_genes |
| chr2  | 173429680 | 173429826 | PDK1   | 693_selected_genes |
| chr2  | 173431558 | 173431686 | PDK1   | 693_selected_genes |
| chr2  | 173433443 | 173433570 | PDK1   | 693_selected_genes |
| chr2  | 173435428 | 173435577 | PDK1   | 693_selected_genes |
| chr2  | 173450980 | 173451141 | PDK1   | 693_selected_genes |
| chr2  | 173457637 | 173457801 | PDK1   | 693_selected_genes |
| chr2  | 173460531 | 173460722 | PDK1   | 693_selected_genes |
| chr16 | 2588088   | 2588162   | PDPK1  | 693_selected_genes |
| chr16 | 2588477   | 2588788   | PDPK1  | 693_selected_genes |
| chr16 | 2607678   | 2607989   | PDPK1  | 693_selected_genes |
| chr16 | 2611455   | 2611548   | PDPK1  | 693_selected_genes |
| chr16 | 2611746   | 2611934   | PDPK1  | 693_selected_genes |
| chr16 | 2615528   | 2615723   | PDPK1  | 693_selected_genes |

|       |           |           |         |                    |
|-------|-----------|-----------|---------|--------------------|
| chr16 | 2616331   | 2616483   | PDPK1   | 693_selected_genes |
| chr16 | 2627400   | 2627526   | PDPK1   | 693_selected_genes |
| chr16 | 2631270   | 2631389   | PDPK1   | 693_selected_genes |
| chr16 | 2631582   | 2631729   | PDPK1   | 693_selected_genes |
| chr16 | 2633387   | 2633611   | PDPK1   | 693_selected_genes |
| chr16 | 2636651   | 2636919   | PDPK1   | 693_selected_genes |
| chr16 | 2645768   | 2645876   | PDPK1   | 693_selected_genes |
| chr16 | 2647098   | 2647301   | PDPK1   | 693_selected_genes |
| chr16 | 2647626   | 2647793   | PDPK1   | 693_selected_genes |
| chrX  | 133511622 | 133511810 | PHF6    | 693_selected_genes |
| chrX  | 133512009 | 133512161 | PHF6    | 693_selected_genes |
| chrX  | 133527505 | 133527689 | PHF6    | 693_selected_genes |
| chrX  | 133527913 | 133528007 | PHF6    | 693_selected_genes |
| chrX  | 133547492 | 133547712 | PHF6    | 693_selected_genes |
| chrX  | 133547827 | 133548021 | PHF6    | 693_selected_genes |
| chrX  | 133549020 | 133549277 | PHF6    | 693_selected_genes |
| chrX  | 133551173 | 133551361 | PHF6    | 693_selected_genes |
| chrX  | 133559205 | 133559385 | PHF6    | 693_selected_genes |
| chr4  | 41747798  | 41748364  | PHOX2B  | 693_selected_genes |
| chr4  | 41749340  | 41749578  | PHOX2B  | 693_selected_genes |
| chr4  | 41749639  | 41749749  | PHOX2B  | 693_selected_genes |
| chr4  | 41750361  | 41750652  | PHOX2B  | 693_selected_genes |
| chr1  | 204393954 | 204394193 | PIK3C2B | 693_selected_genes |
| chr1  | 204394715 | 204394894 | PIK3C2B | 693_selected_genes |
| chr1  | 204396750 | 204396907 | PIK3C2B | 693_selected_genes |
| chr1  | 204397241 | 204397373 | PIK3C2B | 693_selected_genes |
| chr1  | 204399023 | 204399191 | PIK3C2B | 693_selected_genes |
| chr1  | 204400771 | 204400946 | PIK3C2B | 693_selected_genes |
| chr1  | 204401302 | 204401554 | PIK3C2B | 693_selected_genes |
| chr1  | 204402418 | 204402578 | PIK3C2B | 693_selected_genes |
| chr1  | 204402895 | 204403102 | PIK3C2B | 693_selected_genes |
| chr1  | 204403541 | 204403761 | PIK3C2B | 693_selected_genes |
| chr1  | 204408037 | 204408224 | PIK3C2B | 693_selected_genes |
| chr1  | 204409294 | 204409474 | PIK3C2B | 693_selected_genes |
| chr1  | 204410573 | 204410716 | PIK3C2B | 693_selected_genes |
| chr1  | 204411628 | 204411786 | PIK3C2B | 693_selected_genes |
| chr1  | 204412519 | 204412750 | PIK3C2B | 693_selected_genes |
| chr1  | 204413170 | 204413315 | PIK3C2B | 693_selected_genes |
| chr1  | 204413433 | 204413577 | PIK3C2B | 693_selected_genes |
| chr1  | 204415058 | 204415297 | PIK3C2B | 693_selected_genes |
| chr1  | 204416538 | 204416731 | PIK3C2B | 693_selected_genes |
| chr1  | 204418287 | 204418449 | PIK3C2B | 693_selected_genes |
| chr1  | 204418952 | 204419170 | PIK3C2B | 693_selected_genes |
| chr1  | 204423771 | 204423944 | PIK3C2B | 693_selected_genes |
| chr1  | 204424958 | 204425204 | PIK3C2B | 693_selected_genes |
| chr1  | 204426139 | 204426223 | PIK3C2B | 693_selected_genes |
| chr1  | 204426830 | 204427027 | PIK3C2B | 693_selected_genes |
| chr1  | 204428980 | 204429094 | PIK3C2B | 693_selected_genes |
| chr1  | 204429426 | 204429556 | PIK3C2B | 693_selected_genes |
| chr1  | 204429652 | 204429814 | PIK3C2B | 693_selected_genes |
| chr1  | 204433114 | 204433285 | PIK3C2B | 693_selected_genes |
| chr1  | 204433552 | 204433757 | PIK3C2B | 693_selected_genes |
| chr1  | 204434321 | 204434472 | PIK3C2B | 693_selected_genes |
| chr1  | 204435873 | 204436190 | PIK3C2B | 693_selected_genes |
| chr1  | 204437972 | 204438955 | PIK3C2B | 693_selected_genes |
| chr12 | 18434990  | 18435718  | PIK3C2G | 693_selected_genes |
| chr12 | 18439755  | 18439888  | PIK3C2G | 693_selected_genes |
| chr12 | 18443763  | 18443971  | PIK3C2G | 693_selected_genes |
| chr12 | 18446809  | 18446974  | PIK3C2G | 693_selected_genes |
| chr12 | 18466870  | 18467023  | PIK3C2G | 693_selected_genes |
| chr12 | 18473870  | 18473991  | PIK3C2G | 693_selected_genes |
| chr12 | 18477943  | 18478057  | PIK3C2G | 693_selected_genes |
| chr12 | 18491334  | 18491507  | PIK3C2G | 693_selected_genes |
| chr12 | 18496235  | 18496319  | PIK3C2G | 693_selected_genes |
| chr12 | 18499549  | 18499795  | PIK3C2G | 693_selected_genes |
| chr12 | 18515672  | 18515849  | PIK3C2G | 693_selected_genes |
| chr12 | 18524088  | 18524270  | PIK3C2G | 693_selected_genes |
| chr12 | 18534674  | 18534839  | PIK3C2G | 693_selected_genes |
| chr12 | 18544030  | 18544211  | PIK3C2G | 693_selected_genes |
| chr12 | 18552567  | 18552806  | PIK3C2G | 693_selected_genes |
| chr12 | 18573849  | 18573993  | PIK3C2G | 693_selected_genes |
| chr12 | 18576853  | 18576998  | PIK3C2G | 693_selected_genes |
| chr12 | 18641357  | 18641588  | PIK3C2G | 693_selected_genes |
| chr12 | 18644359  | 18644517  | PIK3C2G | 693_selected_genes |
| chr12 | 18648970  | 18649113  | PIK3C2G | 693_selected_genes |
| chr12 | 18650527  | 18650707  | PIK3C2G | 693_selected_genes |
| chr12 | 18656189  | 18656376  | PIK3C2G | 693_selected_genes |
| chr12 | 18658200  | 18658420  | PIK3C2G | 693_selected_genes |
| chr12 | 18691064  | 18691271  | PIK3C2G | 693_selected_genes |
| chr12 | 18699231  | 18699391  | PIK3C2G | 693_selected_genes |
| chr12 | 18715611  | 18715851  | PIK3C2G | 693_selected_genes |
| chr12 | 18716285  | 18716457  | PIK3C2G | 693_selected_genes |
| chr12 | 18719857  | 18720016  | PIK3C2G | 693_selected_genes |
| chr12 | 18747402  | 18747528  | PIK3C2G | 693_selected_genes |

|       |           |           |         |                    |
|-------|-----------|-----------|---------|--------------------|
| chr12 | 18762443  | 18762588  | PIK3C2G | 693_selected_genes |
| chr12 | 18793337  | 18793513  | PIK3C2G | 693_selected_genes |
| chr12 | 18800784  | 18800987  | PIK3C2G | 693_selected_genes |
| chr18 | 39535231  | 39535349  | PIK3C3  | 693_selected_genes |
| chr18 | 39535357  | 39535434  | PIK3C3  | 693_selected_genes |
| chr18 | 39537509  | 39537748  | PIK3C3  | 693_selected_genes |
| chr18 | 39542428  | 39542622  | PIK3C3  | 693_selected_genes |
| chr18 | 39550265  | 39550520  | PIK3C3  | 693_selected_genes |
| chr18 | 39564818  | 39564877  | PIK3C3  | 693_selected_genes |
| chr18 | 39567750  | 39567887  | PIK3C3  | 693_selected_genes |
| chr18 | 39570397  | 39570543  | PIK3C3  | 693_selected_genes |
| chr18 | 39573208  | 39573330  | PIK3C3  | 693_selected_genes |
| chr18 | 39575828  | 39575983  | PIK3C3  | 693_selected_genes |
| chr18 | 39576576  | 39576719  | PIK3C3  | 693_selected_genes |
| chr18 | 39584294  | 39584530  | PIK3C3  | 693_selected_genes |
| chr18 | 39593380  | 39593585  | PIK3C3  | 693_selected_genes |
| chr18 | 39595414  | 39595555  | PIK3C3  | 693_selected_genes |
| chr18 | 39600576  | 39600694  | PIK3C3  | 693_selected_genes |
| chr18 | 39607381  | 39607537  | PIK3C3  | 693_selected_genes |
| chr18 | 39609263  | 39609430  | PIK3C3  | 693_selected_genes |
| chr18 | 39613764  | 39613946  | PIK3C3  | 693_selected_genes |
| chr18 | 39617630  | 39617809  | PIK3C3  | 693_selected_genes |
| chr18 | 39618719  | 39618839  | PIK3C3  | 693_selected_genes |
| chr18 | 39620615  | 39620730  | PIK3C3  | 693_selected_genes |
| chr18 | 39623671  | 39623806  | PIK3C3  | 693_selected_genes |
| chr18 | 39629469  | 39629605  | PIK3C3  | 693_selected_genes |
| chr18 | 39629806  | 39629864  | PIK3C3  | 693_selected_genes |
| chr18 | 39637821  | 39638040  | PIK3C3  | 693_selected_genes |
| chr18 | 39639807  | 39639883  | PIK3C3  | 693_selected_genes |
| chr18 | 39644678  | 39644819  | PIK3C3  | 693_selected_genes |
| chr18 | 39647326  | 39647502  | PIK3C3  | 693_selected_genes |
| chr18 | 39661061  | 39661126  | PIK3C3  | 693_selected_genes |
| chr3  | 178916588 | 178916992 | PIK3CA  | 693_selected_genes |
| chr3  | 178917452 | 178917712 | PIK3CA  | 693_selected_genes |
| chr3  | 178919052 | 178919353 | PIK3CA  | 693_selected_genes |
| chr3  | 178921306 | 178921602 | PIK3CA  | 693_selected_genes |
| chr3  | 178922265 | 178922401 | PIK3CA  | 693_selected_genes |
| chr3  | 178927357 | 178927513 | PIK3CA  | 693_selected_genes |
| chr3  | 178927948 | 178928151 | PIK3CA  | 693_selected_genes |
| chr3  | 178928193 | 178928378 | PIK3CA  | 693_selected_genes |
| chr3  | 178935972 | 178936147 | PIK3CA  | 693_selected_genes |
| chr3  | 178936958 | 178937090 | PIK3CA  | 693_selected_genes |
| chr3  | 178937333 | 178937548 | PIK3CA  | 693_selected_genes |
| chr3  | 178937711 | 178937865 | PIK3CA  | 693_selected_genes |
| chr3  | 178938748 | 178938970 | PIK3CA  | 693_selected_genes |
| chr3  | 178941843 | 178942000 | PIK3CA  | 693_selected_genes |
| chr3  | 178942462 | 178942634 | PIK3CA  | 693_selected_genes |
| chr3  | 178943724 | 178943853 | PIK3CA  | 693_selected_genes |
| chr3  | 178947034 | 178947255 | PIK3CA  | 693_selected_genes |
| chr3  | 178947766 | 178947934 | PIK3CA  | 693_selected_genes |
| chr3  | 178947987 | 178948189 | PIK3CA  | 693_selected_genes |
| chr3  | 178951856 | 178952177 | PIK3CA  | 693_selected_genes |
| chr3  | 138374205 | 138374393 | PIK3CB  | 693_selected_genes |
| chr3  | 138374958 | 138375141 | PIK3CB  | 693_selected_genes |
| chr3  | 138376506 | 138376702 | PIK3CB  | 693_selected_genes |
| chr3  | 138382722 | 138382896 | PIK3CB  | 693_selected_genes |
| chr3  | 138383852 | 138384070 | PIK3CB  | 693_selected_genes |
| chr3  | 138400783 | 138400927 | PIK3CB  | 693_selected_genes |
| chr3  | 138402494 | 138402654 | PIK3CB  | 693_selected_genes |
| chr3  | 138403441 | 138403670 | PIK3CB  | 693_selected_genes |
| chr3  | 138407691 | 138407841 | PIK3CB  | 693_selected_genes |
| chr3  | 138409816 | 138410010 | PIK3CB  | 693_selected_genes |
| chr3  | 138413602 | 138413774 | PIK3CB  | 693_selected_genes |
| chr3  | 138417723 | 138417962 | PIK3CB  | 693_selected_genes |
| chr3  | 138423259 | 138423360 | PIK3CB  | 693_selected_genes |
| chr3  | 138425975 | 138426156 | PIK3CB  | 693_selected_genes |
| chr3  | 138431024 | 138431172 | PIK3CB  | 693_selected_genes |
| chr3  | 138433284 | 138433586 | PIK3CB  | 693_selected_genes |
| chr3  | 138452177 | 138452305 | PIK3CB  | 693_selected_genes |
| chr3  | 138453450 | 138453671 | PIK3CB  | 693_selected_genes |
| chr3  | 138456523 | 138456753 | PIK3CB  | 693_selected_genes |
| chr3  | 138461374 | 138461648 | PIK3CB  | 693_selected_genes |
| chr3  | 138474570 | 138474846 | PIK3CB  | 693_selected_genes |
| chr3  | 138477989 | 138478210 | PIK3CB  | 693_selected_genes |
| chr1  | 9770488   | 9770679   | PIK3CD  | 693_selected_genes |
| chr1  | 9775573   | 9775852   | PIK3CD  | 693_selected_genes |
| chr1  | 9775881   | 9776161   | PIK3CD  | 693_selected_genes |
| chr1  | 9776472   | 9776702   | PIK3CD  | 693_selected_genes |
| chr1  | 9776991   | 9777191   | PIK3CD  | 693_selected_genes |
| chr1  | 9777569   | 9777709   | PIK3CD  | 693_selected_genes |
| chr1  | 9778170   | 9778241   | PIK3CD  | 693_selected_genes |
| chr1  | 9778726   | 9778998   | PIK3CD  | 693_selected_genes |
| chr1  | 9779953   | 9780100   | PIK3CD  | 693_selected_genes |
| chr1  | 9780144   | 9780325   | PIK3CD  | 693_selected_genes |

|       |           |           |         |                    |
|-------|-----------|-----------|---------|--------------------|
| chr1  | 9780466   | 9780744   | PIK3CD  | 693_selected_genes |
| chr1  | 9780774   | 9780992   | PIK3CD  | 693_selected_genes |
| chr1  | 9781159   | 9781331   | PIK3CD  | 693_selected_genes |
| chr1  | 9781476   | 9781674   | PIK3CD  | 693_selected_genes |
| chr1  | 9781793   | 9781943   | PIK3CD  | 693_selected_genes |
| chr1  | 9782007   | 9782236   | PIK3CD  | 693_selected_genes |
| chr1  | 9782276   | 9782439   | PIK3CD  | 693_selected_genes |
| chr1  | 9782560   | 9782689   | PIK3CD  | 693_selected_genes |
| chr1  | 9783157   | 9783375   | PIK3CD  | 693_selected_genes |
| chr1  | 9784001   | 9784175   | PIK3CD  | 693_selected_genes |
| chr1  | 9784308   | 9784504   | PIK3CD  | 693_selected_genes |
| chr1  | 9784836   | 9785019   | PIK3CD  | 693_selected_genes |
| chr1  | 9786941   | 9787129   | PIK3CD  | 693_selected_genes |
| chr7  | 106507981 | 106510026 | PIK3CG  | 693_selected_genes |
| chr7  | 106512956 | 106513072 | PIK3CG  | 693_selected_genes |
| chr7  | 106513132 | 106513408 | PIK3CG  | 693_selected_genes |
| chr7  | 106515119 | 106515273 | PIK3CG  | 693_selected_genes |
| chr7  | 106519938 | 106520135 | PIK3CG  | 693_selected_genes |
| chr7  | 106522536 | 106522677 | PIK3CG  | 693_selected_genes |
| chr7  | 106523452 | 106523633 | PIK3CG  | 693_selected_genes |
| chr7  | 106524574 | 106524736 | PIK3CG  | 693_selected_genes |
| chr7  | 106526554 | 106526762 | PIK3CG  | 693_selected_genes |
| chr7  | 106545528 | 106545857 | PIK3CG  | 693_selected_genes |
| chr5  | 67522478  | 67522862  | PIK3R1  | 693_selected_genes |
| chr5  | 67535700  | 67535790  | PIK3R1  | 693_selected_genes |
| chr5  | 67569192  | 67569335  | PIK3R1  | 693_selected_genes |
| chr5  | 67569741  | 67569866  | PIK3R1  | 693_selected_genes |
| chr5  | 67575404  | 67575586  | PIK3R1  | 693_selected_genes |
| chr5  | 67576330  | 67576582  | PIK3R1  | 693_selected_genes |
| chr5  | 67576729  | 67576859  | PIK3R1  | 693_selected_genes |
| chr5  | 67584538  | 67584604  | PIK3R1  | 693_selected_genes |
| chr5  | 67586531  | 67586687  | PIK3R1  | 693_selected_genes |
| chr5  | 67588061  | 67588214  | PIK3R1  | 693_selected_genes |
| chr5  | 67588288  | 67588376  | PIK3R1  | 693_selected_genes |
| chr5  | 67588903  | 67589052  | PIK3R1  | 693_selected_genes |
| chr5  | 67589105  | 67589336  | PIK3R1  | 693_selected_genes |
| chr5  | 67589511  | 67589687  | PIK3R1  | 693_selected_genes |
| chr5  | 67590338  | 67590531  | PIK3R1  | 693_selected_genes |
| chr5  | 67590950  | 67591177  | PIK3R1  | 693_selected_genes |
| chr5  | 67591222  | 67591341  | PIK3R1  | 693_selected_genes |
| chr5  | 67591949  | 67592194  | PIK3R1  | 693_selected_genes |
| chr5  | 67593214  | 67593454  | PIK3R1  | 693_selected_genes |
| chr19 | 18266664  | 18267036  | PIK3R2  | 693_selected_genes |
| chr19 | 18271255  | 18271398  | PIK3R2  | 693_selected_genes |
| chr19 | 18271703  | 18271804  | PIK3R2  | 693_selected_genes |
| chr19 | 18271838  | 18272020  | PIK3R2  | 693_selected_genes |
| chr19 | 18272063  | 18272330  | PIK3R2  | 693_selected_genes |
| chr19 | 18272750  | 18272886  | PIK3R2  | 693_selected_genes |
| chr19 | 18272986  | 18273145  | PIK3R2  | 693_selected_genes |
| chr19 | 18273192  | 18273341  | PIK3R2  | 693_selected_genes |
| chr19 | 18273751  | 18273982  | PIK3R2  | 693_selected_genes |
| chr19 | 18274047  | 18274223  | PIK3R2  | 693_selected_genes |
| chr19 | 18276895  | 18277137  | PIK3R2  | 693_selected_genes |
| chr19 | 18277914  | 18278141  | PIK3R2  | 693_selected_genes |
| chr19 | 18279259  | 18279381  | PIK3R2  | 693_selected_genes |
| chr19 | 18279510  | 18279731  | PIK3R2  | 693_selected_genes |
| chr19 | 18279871  | 18280129  | PIK3R2  | 693_selected_genes |
| chr6  | 37138053  | 37138458  | PIM1    | 693_selected_genes |
| chr6  | 37138523  | 37138680  | PIM1    | 693_selected_genes |
| chr6  | 37138731  | 37138832  | PIM1    | 693_selected_genes |
| chr6  | 37138875  | 37139292  | PIM1    | 693_selected_genes |
| chr6  | 37140746  | 37140973  | PIM1    | 693_selected_genes |
| chr6  | 37141684  | 37141892  | PIM1    | 693_selected_genes |
| chr1  | 151170468 | 151170618 | PIP5K1A | 693_selected_genes |
| chr1  | 151171447 | 151171617 | PIP5K1A | 693_selected_genes |
| chr1  | 151188412 | 151188501 | PIP5K1A | 693_selected_genes |
| chr1  | 151196695 | 151196780 | PIP5K1A | 693_selected_genes |
| chr1  | 151196821 | 151196907 | PIP5K1A | 693_selected_genes |
| chr1  | 151199770 | 151199901 | PIP5K1A | 693_selected_genes |
| chr1  | 151204121 | 151204302 | PIP5K1A | 693_selected_genes |
| chr1  | 151204698 | 151204866 | PIP5K1A | 693_selected_genes |
| chr1  | 151205001 | 151205204 | PIP5K1A | 693_selected_genes |
| chr1  | 151206647 | 151206997 | PIP5K1A | 693_selected_genes |
| chr1  | 151209008 | 151209264 | PIP5K1A | 693_selected_genes |
| chr1  | 151210632 | 151210766 | PIP5K1A | 693_selected_genes |
| chr1  | 151211580 | 151211679 | PIP5K1A | 693_selected_genes |
| chr1  | 151212405 | 151212540 | PIP5K1A | 693_selected_genes |
| chr1  | 151214573 | 151214770 | PIP5K1A | 693_selected_genes |
| chr1  | 151214888 | 151215068 | PIP5K1A | 693_selected_genes |
| chr1  | 151219370 | 151219466 | PIP5K1A | 693_selected_genes |
| chr1  | 151220313 | 151220448 | PIP5K1A | 693_selected_genes |
| chr12 | 32945332  | 32945451  | PKP2    | 693_selected_genes |
| chr12 | 32945552  | 32945690  | PKP2    | 693_selected_genes |
| chr12 | 32949017  | 32949257  | PKP2    | 693_selected_genes |

|       |          |          |       |                    |
|-------|----------|----------|-------|--------------------|
| chr12 | 32955311 | 32955515 | PKP2  | 693_selected_genes |
| chr12 | 32974264 | 32974488 | PKP2  | 693_selected_genes |
| chr12 | 32975375 | 32975590 | PKP2  | 693_selected_genes |
| chr12 | 32976953 | 32977121 | PKP2  | 693_selected_genes |
| chr12 | 32993936 | 32994164 | PKP2  | 693_selected_genes |
| chr12 | 32996090 | 32996272 | PKP2  | 693_selected_genes |
| chr12 | 33003674 | 33003932 | PKP2  | 693_selected_genes |
| chr12 | 33021835 | 33022021 | PKP2  | 693_selected_genes |
| chr12 | 33030754 | 33031502 | PKP2  | 693_selected_genes |
| chr12 | 33031828 | 33031991 | PKP2  | 693_selected_genes |
| chr12 | 33049417 | 33049690 | PKP2  | 693_selected_genes |
| chr20 | 39766256 | 39766523 | PLCG1 | 693_selected_genes |
| chr20 | 39788220 | 39788423 | PLCG1 | 693_selected_genes |
| chr20 | 39788484 | 39788628 | PLCG1 | 693_selected_genes |
| chr20 | 39788720 | 39788818 | PLCG1 | 693_selected_genes |
| chr20 | 39791066 | 39791201 | PLCG1 | 693_selected_genes |
| chr20 | 39791256 | 39791390 | PLCG1 | 693_selected_genes |
| chr20 | 39791572 | 39791657 | PLCG1 | 693_selected_genes |
| chr20 | 39791817 | 39791940 | PLCG1 | 693_selected_genes |
| chr20 | 39791992 | 39792144 | PLCG1 | 693_selected_genes |
| chr20 | 39792329 | 39792498 | PLCG1 | 693_selected_genes |
| chr20 | 39792535 | 39792671 | PLCG1 | 693_selected_genes |
| chr20 | 39792695 | 39792866 | PLCG1 | 693_selected_genes |
| chr20 | 39793547 | 39793766 | PLCG1 | 693_selected_genes |
| chr20 | 39793859 | 39794032 | PLCG1 | 693_selected_genes |
| chr20 | 39794064 | 39794216 | PLCG1 | 693_selected_genes |
| chr20 | 39794253 | 39794491 | PLCG1 | 693_selected_genes |
| chr20 | 39794808 | 39795059 | PLCG1 | 693_selected_genes |
| chr20 | 39795090 | 39795260 | PLCG1 | 693_selected_genes |
| chr20 | 39795293 | 39795524 | PLCG1 | 693_selected_genes |
| chr20 | 39796466 | 39796594 | PLCG1 | 693_selected_genes |
| chr20 | 39797381 | 39797535 | PLCG1 | 693_selected_genes |
| chr20 | 39797693 | 39797840 | PLCG1 | 693_selected_genes |
| chr20 | 39798071 | 39798191 | PLCG1 | 693_selected_genes |
| chr20 | 39798726 | 39798934 | PLCG1 | 693_selected_genes |
| chr20 | 39800807 | 39800954 | PLCG1 | 693_selected_genes |
| chr20 | 39801035 | 39801310 | PLCG1 | 693_selected_genes |
| chr20 | 39801343 | 39801542 | PLCG1 | 693_selected_genes |
| chr20 | 39802034 | 39802199 | PLCG1 | 693_selected_genes |
| chr20 | 39802266 | 39802478 | PLCG1 | 693_selected_genes |
| chr20 | 39802537 | 39802676 | PLCG1 | 693_selected_genes |
| chr20 | 39802738 | 39802976 | PLCG1 | 693_selected_genes |
| chr20 | 39803081 | 39803174 | PLCG1 | 693_selected_genes |
| chr20 | 39809118 | 39809183 | PLCG1 | 693_selected_genes |
| chr16 | 81819569 | 81819812 | PLCG2 | 693_selected_genes |
| chr16 | 81888023 | 81888217 | PLCG2 | 693_selected_genes |
| chr16 | 81891842 | 81891986 | PLCG2 | 693_selected_genes |
| chr16 | 81892695 | 81892793 | PLCG2 | 693_selected_genes |
| chr16 | 81902793 | 81902928 | PLCG2 | 693_selected_genes |
| chr16 | 81904431 | 81904565 | PLCG2 | 693_selected_genes |
| chr16 | 81914489 | 81914583 | PLCG2 | 693_selected_genes |
| chr16 | 81916848 | 81916971 | PLCG2 | 693_selected_genes |
| chr16 | 81922751 | 81922903 | PLCG2 | 693_selected_genes |
| chr16 | 81925051 | 81925220 | PLCG2 | 693_selected_genes |
| chr16 | 81927288 | 81927424 | PLCG2 | 693_selected_genes |
| chr16 | 81929386 | 81929557 | PLCG2 | 693_selected_genes |
| chr16 | 81931455 | 81931539 | PLCG2 | 693_selected_genes |
| chr16 | 81934191 | 81934410 | PLCG2 | 693_selected_genes |
| chr16 | 81938982 | 81939137 | PLCG2 | 693_selected_genes |
| chr16 | 81941264 | 81941404 | PLCG2 | 693_selected_genes |
| chr16 | 81941995 | 81942221 | PLCG2 | 693_selected_genes |
| chr16 | 81944099 | 81944350 | PLCG2 | 693_selected_genes |
| chr16 | 81946176 | 81946346 | PLCG2 | 693_selected_genes |
| chr16 | 81953063 | 81953294 | PLCG2 | 693_selected_genes |
| chr16 | 81954777 | 81954899 | PLCG2 | 693_selected_genes |
| chr16 | 81957064 | 81957224 | PLCG2 | 693_selected_genes |
| chr16 | 81960661 | 81960808 | PLCG2 | 693_selected_genes |
| chr16 | 81962137 | 81962254 | PLCG2 | 693_selected_genes |
| chr16 | 81965076 | 81965284 | PLCG2 | 693_selected_genes |
| chr16 | 81968008 | 81968161 | PLCG2 | 693_selected_genes |
| chr16 | 81969748 | 81970008 | PLCG2 | 693_selected_genes |
| chr16 | 81971337 | 81971533 | PLCG2 | 693_selected_genes |
| chr16 | 81972380 | 81972545 | PLCG2 | 693_selected_genes |
| chr16 | 81973471 | 81973689 | PLCG2 | 693_selected_genes |
| chr16 | 81979754 | 81979893 | PLCG2 | 693_selected_genes |
| chr16 | 81990274 | 81990509 | PLCG2 | 693_selected_genes |
| chr16 | 81991535 | 81991628 | PLCG2 | 693_selected_genes |
| chr5  | 57750384 | 57750626 | PLK2  | 693_selected_genes |
| chr5  | 57750712 | 57750873 | PLK2  | 693_selected_genes |
| chr5  | 57751086 | 57751266 | PLK2  | 693_selected_genes |
| chr5  | 57751340 | 57751631 | PLK2  | 693_selected_genes |
| chr5  | 57751827 | 57752007 | PLK2  | 693_selected_genes |
| chr5  | 57752293 | 57752441 | PLK2  | 693_selected_genes |
| chr5  | 57752746 | 57752944 | PLK2  | 693_selected_genes |

|       |           |           |        |                    |
|-------|-----------|-----------|--------|--------------------|
| chr5  | 57752982  | 57753231  | PLK2   | 693_selected_genes |
| chr5  | 57753289  | 57753435  | PLK2   | 693_selected_genes |
| chr5  | 57753885  | 57754023  | PLK2   | 693_selected_genes |
| chr5  | 57754200  | 57754380  | PLK2   | 693_selected_genes |
| chr5  | 57754526  | 57754693  | PLK2   | 693_selected_genes |
| chr5  | 57754786  | 57754944  | PLK2   | 693_selected_genes |
| chr5  | 57755491  | 57755811  | PLK2   | 693_selected_genes |
| chr18 | 57567384  | 57567492  | PMAIP1 | 693_selected_genes |
| chr18 | 57567634  | 57567835  | PMAIP1 | 693_selected_genes |
| chr18 | 57569853  | 57570105  | PMAIP1 | 693_selected_genes |
| chr15 | 74287128  | 74287307  | PML    | 693_selected_genes |
| chr15 | 74290319  | 74290842  | PML    | 693_selected_genes |
| chr15 | 74315143  | 74315774  | PML    | 693_selected_genes |
| chr15 | 74317172  | 74317293  | PML    | 693_selected_genes |
| chr15 | 74324887  | 74325081  | PML    | 693_selected_genes |
| chr15 | 74325471  | 74325974  | PML    | 693_selected_genes |
| chr15 | 74326793  | 74327022  | PML    | 693_selected_genes |
| chr15 | 74327447  | 74328317  | PML    | 693_selected_genes |
| chr15 | 74328322  | 74328426  | PML    | 693_selected_genes |
| chr15 | 74335304  | 74335546  | PML    | 693_selected_genes |
| chr15 | 74336536  | 74337374  | PML    | 693_selected_genes |
| chr2  | 190656510 | 190656692 | PMS1   | 693_selected_genes |
| chr2  | 190660469 | 190660702 | PMS1   | 693_selected_genes |
| chr2  | 190670352 | 190670633 | PMS1   | 693_selected_genes |
| chr2  | 190671123 | 190671253 | PMS1   | 693_selected_genes |
| chr2  | 190682717 | 190682932 | PMS1   | 693_selected_genes |
| chr2  | 190708664 | 190708831 | PMS1   | 693_selected_genes |
| chr2  | 190717355 | 190717528 | PMS1   | 693_selected_genes |
| chr2  | 190718639 | 190718833 | PMS1   | 693_selected_genes |
| chr2  | 190718939 | 190719879 | PMS1   | 693_selected_genes |
| chr2  | 190720529 | 190720622 | PMS1   | 693_selected_genes |
| chr2  | 190722185 | 190722255 | PMS1   | 693_selected_genes |
| chr2  | 190728443 | 190728979 | PMS1   | 693_selected_genes |
| chr2  | 190732499 | 190732680 | PMS1   | 693_selected_genes |
| chr2  | 190738196 | 190738407 | PMS1   | 693_selected_genes |
| chr2  | 190741972 | 190742187 | PMS1   | 693_selected_genes |
| chr7  | 6013004   | 6013198   | PMS2   | 693_selected_genes |
| chr7  | 6017193   | 6017413   | PMS2   | 693_selected_genes |
| chr7  | 6018201   | 6018352   | PMS2   | 693_selected_genes |
| chr7  | 6022429   | 6022647   | PMS2   | 693_selected_genes |
| chr7  | 6026364   | 6027276   | PMS2   | 693_selected_genes |
| chr7  | 6029405   | 6029611   | PMS2   | 693_selected_genes |
| chr7  | 6031578   | 6031713   | PMS2   | 693_selected_genes |
| chr7  | 6035139   | 6035289   | PMS2   | 693_selected_genes |
| chr7  | 6036931   | 6037079   | PMS2   | 693_selected_genes |
| chr7  | 6038713   | 6038931   | PMS2   | 693_selected_genes |
| chr7  | 6042058   | 6042292   | PMS2   | 693_selected_genes |
| chr7  | 6043295   | 6043448   | PMS2   | 693_selected_genes |
| chr7  | 6043577   | 6043714   | PMS2   | 693_selected_genes |
| chr7  | 6045497   | 6045687   | PMS2   | 693_selected_genes |
| chr7  | 6048602   | 6048675   | PMS2   | 693_selected_genes |
| chr6  | 89790588  | 89791178  | PNRC1  | 693_selected_genes |
| chr6  | 89793446  | 89793940  | PNRC1  | 693_selected_genes |
| chr19 | 50902083  | 50902335  | POLD1  | 693_selected_genes |
| chr19 | 50902602  | 50902766  | POLD1  | 693_selected_genes |
| chr19 | 50905009  | 50905206  | POLD1  | 693_selected_genes |
| chr19 | 50905230  | 50905424  | POLD1  | 693_selected_genes |
| chr19 | 50905436  | 50905655  | POLD1  | 693_selected_genes |
| chr19 | 50905685  | 50905817  | POLD1  | 693_selected_genes |
| chr19 | 50905843  | 50906023  | POLD1  | 693_selected_genes |
| chr19 | 50906284  | 50906501  | POLD1  | 693_selected_genes |
| chr19 | 50906724  | 50906879  | POLD1  | 693_selected_genes |
| chr19 | 50909413  | 50909604  | POLD1  | 693_selected_genes |
| chr19 | 50909638  | 50909799  | POLD1  | 693_selected_genes |
| chr19 | 50910214  | 50910456  | POLD1  | 693_selected_genes |
| chr19 | 50910558  | 50910697  | POLD1  | 693_selected_genes |
| chr19 | 50911938  | 50912183  | POLD1  | 693_selected_genes |
| chr19 | 50912353  | 50912517  | POLD1  | 693_selected_genes |
| chr19 | 50912750  | 50912948  | POLD1  | 693_selected_genes |
| chr19 | 50916657  | 50916803  | POLD1  | 693_selected_genes |
| chr19 | 50916973  | 50917161  | POLD1  | 693_selected_genes |
| chr19 | 50918046  | 50918272  | POLD1  | 693_selected_genes |
| chr19 | 50918669  | 50918884  | POLD1  | 693_selected_genes |
| chr19 | 50918955  | 50919108  | POLD1  | 693_selected_genes |
| chr19 | 50919627  | 50919810  | POLD1  | 693_selected_genes |
| chr19 | 50919841  | 50920005  | POLD1  | 693_selected_genes |
| chr19 | 50920276  | 50920379  | POLD1  | 693_selected_genes |
| chr19 | 50920403  | 50920551  | POLD1  | 693_selected_genes |
| chr19 | 50921073  | 50921229  | POLD1  | 693_selected_genes |
| chr12 | 133201257 | 133201421 | POLE   | 693_selected_genes |
| chr12 | 133201465 | 133201605 | POLE   | 693_selected_genes |
| chr12 | 133202205 | 133202381 | POLE   | 693_selected_genes |
| chr12 | 133202677 | 133202928 | POLE   | 693_selected_genes |
| chr12 | 133208875 | 133209119 | POLE   | 693_selected_genes |

|       |           |           |        |                    |
|-------|-----------|-----------|--------|--------------------|
| chr12 | 133209224 | 133209406 | POLE   | 693_selected_genes |
| chr12 | 133210746 | 133210989 | POLE   | 693_selected_genes |
| chr12 | 133212452 | 133212635 | POLE   | 693_selected_genes |
| chr12 | 133214574 | 133214750 | POLE   | 693_selected_genes |
| chr12 | 133215685 | 133215909 | POLE   | 693_selected_genes |
| chr12 | 133218207 | 133218462 | POLE   | 693_selected_genes |
| chr12 | 133218737 | 133219008 | POLE   | 693_selected_genes |
| chr12 | 133219066 | 133219340 | POLE   | 693_selected_genes |
| chr12 | 133219380 | 133219607 | POLE   | 693_selected_genes |
| chr12 | 133219784 | 133219941 | POLE   | 693_selected_genes |
| chr12 | 133219967 | 133220171 | POLE   | 693_selected_genes |
| chr12 | 133220397 | 133220588 | POLE   | 693_selected_genes |
| chr12 | 133225487 | 133225683 | POLE   | 693_selected_genes |
| chr12 | 133225866 | 133226126 | POLE   | 693_selected_genes |
| chr12 | 133226237 | 133226500 | POLE   | 693_selected_genes |
| chr12 | 133233696 | 133233869 | POLE   | 693_selected_genes |
| chr12 | 133233909 | 133234040 | POLE   | 693_selected_genes |
| chr12 | 133234428 | 133234581 | POLE   | 693_selected_genes |
| chr12 | 133235855 | 133236120 | POLE   | 693_selected_genes |
| chr12 | 133237529 | 133237775 | POLE   | 693_selected_genes |
| chr12 | 133238087 | 133238295 | POLE   | 693_selected_genes |
| chr12 | 133240564 | 133240759 | POLE   | 693_selected_genes |
| chr12 | 133240930 | 133241073 | POLE   | 693_selected_genes |
| chr12 | 133241862 | 133242061 | POLE   | 693_selected_genes |
| chr12 | 133244063 | 133244259 | POLE   | 693_selected_genes |
| chr12 | 133244916 | 133245113 | POLE   | 693_selected_genes |
| chr12 | 133245195 | 133245348 | POLE   | 693_selected_genes |
| chr12 | 133245371 | 133245550 | POLE   | 693_selected_genes |
| chr12 | 133248775 | 133248933 | POLE   | 693_selected_genes |
| chr12 | 133249187 | 133249450 | POLE   | 693_selected_genes |
| chr12 | 133249724 | 133249888 | POLE   | 693_selected_genes |
| chr12 | 133250135 | 133250318 | POLE   | 693_selected_genes |
| chr12 | 133251958 | 133252128 | POLE   | 693_selected_genes |
| chr12 | 133252295 | 133252431 | POLE   | 693_selected_genes |
| chr12 | 133252654 | 133252815 | POLE   | 693_selected_genes |
| chr12 | 133253106 | 133253264 | POLE   | 693_selected_genes |
| chr12 | 133253923 | 133254054 | POLE   | 693_selected_genes |
| chr12 | 133254138 | 133254330 | POLE   | 693_selected_genes |
| chr12 | 133256057 | 133256262 | POLE   | 693_selected_genes |
| chr12 | 133256514 | 133256657 | POLE   | 693_selected_genes |
| chr12 | 133256738 | 133256833 | POLE   | 693_selected_genes |
| chr12 | 133257167 | 133257298 | POLE   | 693_selected_genes |
| chr12 | 133257698 | 133257890 | POLE   | 693_selected_genes |
| chr12 | 133263814 | 133263926 | POLE   | 693_selected_genes |
| chr3  | 121151125 | 121151289 | POLQ   | 693_selected_genes |
| chr3  | 121151739 | 121151905 | POLQ   | 693_selected_genes |
| chr3  | 121154943 | 121155147 | POLQ   | 693_selected_genes |
| chr3  | 121158813 | 121158988 | POLQ   | 693_selected_genes |
| chr3  | 121168136 | 121168298 | POLQ   | 693_selected_genes |
| chr3  | 121178871 | 121179106 | POLQ   | 693_selected_genes |
| chr3  | 121186340 | 121186512 | POLQ   | 693_selected_genes |
| chr3  | 121187126 | 121187303 | POLQ   | 693_selected_genes |
| chr3  | 121190811 | 121191036 | POLQ   | 693_selected_genes |
| chr3  | 121192171 | 121192359 | POLQ   | 693_selected_genes |
| chr3  | 121195361 | 121195605 | POLQ   | 693_selected_genes |
| chr3  | 121200393 | 121200684 | POLQ   | 693_selected_genes |
| chr3  | 121202207 | 121202454 | POLQ   | 693_selected_genes |
| chr3  | 121203862 | 121204056 | POLQ   | 693_selected_genes |
| chr3  | 121206123 | 121209280 | POLQ   | 693_selected_genes |
| chr3  | 121212299 | 121212593 | POLQ   | 693_selected_genes |
| chr3  | 121215629 | 121215804 | POLQ   | 693_selected_genes |
| chr3  | 121217298 | 121217542 | POLQ   | 693_selected_genes |
| chr3  | 121228382 | 121228575 | POLQ   | 693_selected_genes |
| chr3  | 121228860 | 121229115 | POLQ   | 693_selected_genes |
| chr3  | 121230708 | 121230901 | POLQ   | 693_selected_genes |
| chr3  | 121238692 | 121238955 | POLQ   | 693_selected_genes |
| chr3  | 121240824 | 121241021 | POLQ   | 693_selected_genes |
| chr3  | 121248466 | 121248664 | POLQ   | 693_selected_genes |
| chr3  | 121251811 | 121252081 | POLQ   | 693_selected_genes |
| chr3  | 121255921 | 121256080 | POLQ   | 693_selected_genes |
| chr3  | 121258254 | 121258461 | POLQ   | 693_selected_genes |
| chr3  | 121260170 | 121260351 | POLQ   | 693_selected_genes |
| chr3  | 121263548 | 121263778 | POLQ   | 693_selected_genes |
| chr3  | 121264536 | 121264749 | POLQ   | 693_selected_genes |
| chr12 | 106751632 | 106751754 | POLR3B | 693_selected_genes |
| chr12 | 106757622 | 106757705 | POLR3B | 693_selected_genes |
| chr12 | 106760268 | 106760375 | POLR3B | 693_selected_genes |
| chr12 | 106760410 | 106760525 | POLR3B | 693_selected_genes |
| chr12 | 106763027 | 106763153 | POLR3B | 693_selected_genes |
| chr12 | 106763335 | 106763486 | POLR3B | 693_selected_genes |
| chr12 | 106770111 | 106770253 | POLR3B | 693_selected_genes |
| chr12 | 106772019 | 106772187 | POLR3B | 693_selected_genes |
| chr12 | 106773783 | 106773942 | POLR3B | 693_selected_genes |
| chr12 | 106786783 | 106786956 | POLR3B | 693_selected_genes |

|       |           |           |         |                    |
|-------|-----------|-----------|---------|--------------------|
| chr12 | 106799609 | 106799779 | POLR3B  | 693_selected_genes |
| chr12 | 106804578 | 106804763 | POLR3B  | 693_selected_genes |
| chr12 | 106820949 | 106821161 | POLR3B  | 693_selected_genes |
| chr12 | 106824025 | 106824276 | POLR3B  | 693_selected_genes |
| chr12 | 106826070 | 106826283 | POLR3B  | 693_selected_genes |
| chr12 | 106827471 | 106827675 | POLR3B  | 693_selected_genes |
| chr12 | 106830809 | 106830934 | POLR3B  | 693_selected_genes |
| chr12 | 106831433 | 106831582 | POLR3B  | 693_selected_genes |
| chr12 | 106838215 | 106838393 | POLR3B  | 693_selected_genes |
| chr12 | 106848254 | 106848514 | POLR3B  | 693_selected_genes |
| chr12 | 106850890 | 106851099 | POLR3B  | 693_selected_genes |
| chr12 | 106853003 | 106853171 | POLR3B  | 693_selected_genes |
| chr12 | 106857230 | 106857423 | POLR3B  | 693_selected_genes |
| chr12 | 106889807 | 106889961 | POLR3B  | 693_selected_genes |
| chr12 | 106890504 | 106890721 | POLR3B  | 693_selected_genes |
| chr12 | 106895075 | 106895239 | POLR3B  | 693_selected_genes |
| chr12 | 106897833 | 106898057 | POLR3B  | 693_selected_genes |
| chr12 | 106903172 | 106903352 | POLR3B  | 693_selected_genes |
| chr19 | 42595383  | 42596117  | POU2F2  | 693_selected_genes |
| chr19 | 42596191  | 42596447  | POU2F2  | 693_selected_genes |
| chr19 | 42597893  | 42598072  | POU2F2  | 693_selected_genes |
| chr19 | 42599412  | 42599639  | POU2F2  | 693_selected_genes |
| chr19 | 42599671  | 42599870  | POU2F2  | 693_selected_genes |
| chr19 | 42599914  | 42600106  | POU2F2  | 693_selected_genes |
| chr19 | 42600208  | 42600420  | POU2F2  | 693_selected_genes |
| chr19 | 42603653  | 42603795  | POU2F2  | 693_selected_genes |
| chr19 | 42603842  | 42603998  | POU2F2  | 693_selected_genes |
| chr19 | 42614832  | 42614933  | POU2F2  | 693_selected_genes |
| chr19 | 42620835  | 42621064  | POU2F2  | 693_selected_genes |
| chr19 | 42621376  | 42621609  | POU2F2  | 693_selected_genes |
| chr19 | 42626219  | 42626359  | POU2F2  | 693_selected_genes |
| chr19 | 42626470  | 42626555  | POU2F2  | 693_selected_genes |
| chr19 | 42626637  | 42626757  | POU2F2  | 693_selected_genes |
| chr19 | 42636510  | 42636588  | POU2F2  | 693_selected_genes |
| chr17 | 58677750  | 58678272  | PPM1D   | 693_selected_genes |
| chr17 | 58682041  | 58682134  | PPM1D   | 693_selected_genes |
| chr17 | 58700856  | 58701135  | PPM1D   | 693_selected_genes |
| chr17 | 58711188  | 58711363  | PPM1D   | 693_selected_genes |
| chr17 | 58725227  | 58725468  | PPM1D   | 693_selected_genes |
| chr17 | 58733934  | 58734227  | PPM1D   | 693_selected_genes |
| chr17 | 58734267  | 58734350  | PPM1D   | 693_selected_genes |
| chr17 | 58740330  | 58740938  | PPM1D   | 693_selected_genes |
| chr19 | 52693324  | 52693572  | PPP2R1A | 693_selected_genes |
| chr19 | 52694272  | 52694445  | PPP2R1A | 693_selected_genes |
| chr19 | 52703501  | 52703590  | PPP2R1A | 693_selected_genes |
| chr19 | 52705171  | 52705312  | PPP2R1A | 693_selected_genes |
| chr19 | 52709190  | 52709341  | PPP2R1A | 693_selected_genes |
| chr19 | 52714487  | 52714770  | PPP2R1A | 693_selected_genes |
| chr19 | 52715913  | 52716111  | PPP2R1A | 693_selected_genes |
| chr19 | 52716182  | 52716388  | PPP2R1A | 693_selected_genes |
| chr19 | 52719006  | 52719171  | PPP2R1A | 693_selected_genes |
| chr19 | 52719231  | 52719352  | PPP2R1A | 693_selected_genes |
| chr19 | 52719756  | 52719941  | PPP2R1A | 693_selected_genes |
| chr19 | 52722918  | 52723142  | PPP2R1A | 693_selected_genes |
| chr19 | 52723416  | 52723527  | PPP2R1A | 693_selected_genes |
| chr19 | 52724206  | 52724411  | PPP2R1A | 693_selected_genes |
| chr19 | 52725326  | 52725519  | PPP2R1A | 693_selected_genes |
| chr19 | 52728944  | 52729097  | PPP2R1A | 693_selected_genes |
| chr19 | 52729192  | 52729259  | PPP2R1A | 693_selected_genes |
| chr9  | 127911926 | 127912225 | PPP6C   | 693_selected_genes |
| chr9  | 127915786 | 127916046 | PPP6C   | 693_selected_genes |
| chr9  | 127916159 | 127916289 | PPP6C   | 693_selected_genes |
| chr9  | 127920494 | 127920686 | PPP6C   | 693_selected_genes |
| chr9  | 127923094 | 127923210 | PPP6C   | 693_selected_genes |
| chr9  | 127933338 | 127933484 | PPP6C   | 693_selected_genes |
| chr9  | 127934162 | 127934251 | PPP6C   | 693_selected_genes |
| chr9  | 127951172 | 127951251 | PPP6C   | 693_selected_genes |
| chr9  | 127951815 | 127952022 | PPP6C   | 693_selected_genes |
| chr6  | 106534403 | 106534495 | PRDM1   | 693_selected_genes |
| chr6  | 106536050 | 106536349 | PRDM1   | 693_selected_genes |
| chr6  | 106543464 | 106543634 | PRDM1   | 693_selected_genes |
| chr6  | 106546523 | 106546621 | PRDM1   | 693_selected_genes |
| chr6  | 106546935 | 106546994 | PRDM1   | 693_selected_genes |
| chr6  | 106547149 | 106547452 | PRDM1   | 693_selected_genes |
| chr6  | 106552674 | 106553833 | PRDM1   | 693_selected_genes |
| chr6  | 106554220 | 106554399 | PRDM1   | 693_selected_genes |
| chr6  | 106554760 | 106555386 | PRDM1   | 693_selected_genes |
| chr7  | 151254261 | 151254343 | PRKAG2  | 693_selected_genes |
| chr7  | 151257584 | 151257728 | PRKAG2  | 693_selected_genes |
| chr7  | 151261138 | 151261335 | PRKAG2  | 693_selected_genes |
| chr7  | 151262406 | 151262494 | PRKAG2  | 693_selected_genes |
| chr7  | 151262780 | 151262996 | PRKAG2  | 693_selected_genes |
| chr7  | 151263633 | 151263724 | PRKAG2  | 693_selected_genes |
| chr7  | 151265776 | 151265953 | PRKAG2  | 693_selected_genes |

|       |           |           |         |                    |
|-------|-----------|-----------|---------|--------------------|
| chr7  | 151267231 | 151267336 | PRKAG2  | 693_selected_genes |
| chr7  | 151269724 | 151269820 | PRKAG2  | 693_selected_genes |
| chr7  | 151271951 | 151272060 | PRKAG2  | 693_selected_genes |
| chr7  | 151273431 | 151273563 | PRKAG2  | 693_selected_genes |
| chr7  | 151292405 | 151292565 | PRKAG2  | 693_selected_genes |
| chr7  | 151328701 | 151328879 | PRKAG2  | 693_selected_genes |
| chr7  | 151329129 | 151329249 | PRKAG2  | 693_selected_genes |
| chr7  | 151372480 | 151372748 | PRKAG2  | 693_selected_genes |
| chr7  | 151432960 | 151433104 | PRKAG2  | 693_selected_genes |
| chr7  | 151478212 | 151478542 | PRKAG2  | 693_selected_genes |
| chr7  | 151483530 | 151483652 | PRKAG2  | 693_selected_genes |
| chr7  | 151573566 | 151573730 | PRKAG2  | 693_selected_genes |
| chr17 | 66511515  | 66511742  | PRKAR1A | 693_selected_genes |
| chr17 | 66518871  | 66519092  | PRKAR1A | 693_selected_genes |
| chr17 | 66519829  | 66519982  | PRKAR1A | 693_selected_genes |
| chr17 | 66520131  | 66520244  | PRKAR1A | 693_selected_genes |
| chr17 | 66521027  | 66521124  | PRKAR1A | 693_selected_genes |
| chr17 | 66521869  | 66522078  | PRKAR1A | 693_selected_genes |
| chr17 | 66523955  | 66524066  | PRKAR1A | 693_selected_genes |
| chr17 | 66524746  | 66524810  | PRKAR1A | 693_selected_genes |
| chr17 | 66524985  | 66525158  | PRKAR1A | 693_selected_genes |
| chr17 | 66526035  | 66526244  | PRKAR1A | 693_selected_genes |
| chr17 | 66526392  | 66526615  | PRKAR1A | 693_selected_genes |
| chr17 | 66547199  | 66547290  | PRKAR1A | 693_selected_genes |
| chr8  | 48686708  | 48686963  | PRKDC   | 693_selected_genes |
| chr8  | 48689379  | 48689569  | PRKDC   | 693_selected_genes |
| chr8  | 48690221  | 48690460  | PRKDC   | 693_selected_genes |
| chr8  | 48690994  | 48691246  | PRKDC   | 693_selected_genes |
| chr8  | 48691263  | 48691385  | PRKDC   | 693_selected_genes |
| chr8  | 48691539  | 48691679  | PRKDC   | 693_selected_genes |
| chr8  | 48694697  | 48694840  | PRKDC   | 693_selected_genes |
| chr8  | 48694913  | 48695184  | PRKDC   | 693_selected_genes |
| chr8  | 48696277  | 48696395  | PRKDC   | 693_selected_genes |
| chr8  | 48697648  | 48697903  | PRKDC   | 693_selected_genes |
| chr8  | 48701441  | 48701635  | PRKDC   | 693_selected_genes |
| chr8  | 48701686  | 48701824  | PRKDC   | 693_selected_genes |
| chr8  | 48706825  | 48707087  | PRKDC   | 693_selected_genes |
| chr8  | 48710772  | 48710983  | PRKDC   | 693_selected_genes |
| chr8  | 48711745  | 48711976  | PRKDC   | 693_selected_genes |
| chr8  | 48713328  | 48713572  | PRKDC   | 693_selected_genes |
| chr8  | 48715841  | 48716066  | PRKDC   | 693_selected_genes |
| chr8  | 48719672  | 48719912  | PRKDC   | 693_selected_genes |
| chr8  | 48729985  | 48730147  | PRKDC   | 693_selected_genes |
| chr8  | 48731937  | 48732096  | PRKDC   | 693_selected_genes |
| chr8  | 48733254  | 48733529  | PRKDC   | 693_selected_genes |
| chr8  | 48734139  | 48734378  | PRKDC   | 693_selected_genes |
| chr8  | 48736393  | 48736582  | PRKDC   | 693_selected_genes |
| chr8  | 48739191  | 48739447  | PRKDC   | 693_selected_genes |
| chr8  | 48740703  | 48740933  | PRKDC   | 693_selected_genes |
| chr8  | 48743140  | 48743322  | PRKDC   | 693_selected_genes |
| chr8  | 48744349  | 48744512  | PRKDC   | 693_selected_genes |
| chr8  | 48746731  | 48746982  | PRKDC   | 693_selected_genes |
| chr8  | 48748873  | 48749113  | PRKDC   | 693_selected_genes |
| chr8  | 48749747  | 48750005  | PRKDC   | 693_selected_genes |
| chr8  | 48751683  | 48751832  | PRKDC   | 693_selected_genes |
| chr8  | 48752551  | 48752775  | PRKDC   | 693_selected_genes |
| chr8  | 48761689  | 48761889  | PRKDC   | 693_selected_genes |
| chr8  | 48761914  | 48762089  | PRKDC   | 693_selected_genes |
| chr8  | 48765208  | 48765370  | PRKDC   | 693_selected_genes |
| chr8  | 48766618  | 48766800  | PRKDC   | 693_selected_genes |
| chr8  | 48767757  | 48767959  | PRKDC   | 693_selected_genes |
| chr8  | 48769691  | 48769885  | PRKDC   | 693_selected_genes |
| chr8  | 48771051  | 48771221  | PRKDC   | 693_selected_genes |
| chr8  | 48771384  | 48771572  | PRKDC   | 693_selected_genes |
| chr8  | 48772146  | 48772345  | PRKDC   | 693_selected_genes |
| chr8  | 48773434  | 48773557  | PRKDC   | 693_selected_genes |
| chr8  | 48774597  | 48774713  | PRKDC   | 693_selected_genes |
| chr8  | 48774908  | 48775127  | PRKDC   | 693_selected_genes |
| chr8  | 48775934  | 48776163  | PRKDC   | 693_selected_genes |
| chr8  | 48777091  | 48777349  | PRKDC   | 693_selected_genes |
| chr8  | 48790259  | 48790437  | PRKDC   | 693_selected_genes |
| chr8  | 48792026  | 48792244  | PRKDC   | 693_selected_genes |
| chr8  | 48793951  | 48794106  | PRKDC   | 693_selected_genes |
| chr8  | 48794447  | 48794683  | PRKDC   | 693_selected_genes |
| chr8  | 48798479  | 48798733  | PRKDC   | 693_selected_genes |
| chr8  | 48800082  | 48800291  | PRKDC   | 693_selected_genes |
| chr8  | 48801053  | 48801236  | PRKDC   | 693_selected_genes |
| chr8  | 48801549  | 48801808  | PRKDC   | 693_selected_genes |
| chr8  | 48802792  | 48803066  | PRKDC   | 693_selected_genes |
| chr8  | 48805674  | 48805972  | PRKDC   | 693_selected_genes |
| chr8  | 48809695  | 48809879  | PRKDC   | 693_selected_genes |
| chr8  | 48811004  | 48811154  | PRKDC   | 693_selected_genes |
| chr8  | 48812907  | 48813052  | PRKDC   | 693_selected_genes |
| chr8  | 48815103  | 48815380  | PRKDC   | 693_selected_genes |

|       |          |          |       |                    |
|-------|----------|----------|-------|--------------------|
| chr8  | 48817403 | 48817561 | PRKDC | 693_selected_genes |
| chr8  | 48824944 | 48825147 | PRKDC | 693_selected_genes |
| chr8  | 48826435 | 48826649 | PRKDC | 693_selected_genes |
| chr8  | 48827862 | 48828003 | PRKDC | 693_selected_genes |
| chr8  | 48830811 | 48830968 | PRKDC | 693_selected_genes |
| chr8  | 48839728 | 48839938 | PRKDC | 693_selected_genes |
| chr8  | 48840305 | 48840475 | PRKDC | 693_selected_genes |
| chr8  | 48841626 | 48841763 | PRKDC | 693_selected_genes |
| chr8  | 48842387 | 48842597 | PRKDC | 693_selected_genes |
| chr8  | 48843206 | 48843372 | PRKDC | 693_selected_genes |
| chr8  | 48845554 | 48845757 | PRKDC | 693_selected_genes |
| chr8  | 48846499 | 48846675 | PRKDC | 693_selected_genes |
| chr8  | 48847543 | 48847643 | PRKDC | 693_selected_genes |
| chr8  | 48848266 | 48848485 | PRKDC | 693_selected_genes |
| chr8  | 48848887 | 48849102 | PRKDC | 693_selected_genes |
| chr8  | 48852085 | 48852282 | PRKDC | 693_selected_genes |
| chr8  | 48855743 | 48855951 | PRKDC | 693_selected_genes |
| chr8  | 48856387 | 48856468 | PRKDC | 693_selected_genes |
| chr8  | 48856508 | 48856614 | PRKDC | 693_selected_genes |
| chr8  | 48866154 | 48866304 | PRKDC | 693_selected_genes |
| chr8  | 48866341 | 48866504 | PRKDC | 693_selected_genes |
| chr8  | 48866872 | 48867031 | PRKDC | 693_selected_genes |
| chr8  | 48868408 | 48868533 | PRKDC | 693_selected_genes |
| chr8  | 48869705 | 48869848 | PRKDC | 693_selected_genes |
| chr8  | 48869889 | 48870016 | PRKDC | 693_selected_genes |
| chr8  | 48872507 | 48872711 | PRKDC | 693_selected_genes |
| chr17 | 1553927  | 1554275  | PRPF8 | 693_selected_genes |
| chr17 | 1554376  | 1554629  | PRPF8 | 693_selected_genes |
| chr17 | 1554682  | 1554872  | PRPF8 | 693_selected_genes |
| chr17 | 1554916  | 1555107  | PRPF8 | 693_selected_genes |
| chr17 | 1556810  | 1557002  | PRPF8 | 693_selected_genes |
| chr17 | 1557045  | 1557335  | PRPF8 | 693_selected_genes |
| chr17 | 1558618  | 1558862  | PRPF8 | 693_selected_genes |
| chr17 | 1559660  | 1559884  | PRPF8 | 693_selected_genes |
| chr17 | 1559916  | 1560080  | PRPF8 | 693_selected_genes |
| chr17 | 1561521  | 1561700  | PRPF8 | 693_selected_genes |
| chr17 | 1561794  | 1562082  | PRPF8 | 693_selected_genes |
| chr17 | 1562625  | 1562867  | PRPF8 | 693_selected_genes |
| chr17 | 1563109  | 1563320  | PRPF8 | 693_selected_genes |
| chr17 | 1563700  | 1563897  | PRPF8 | 693_selected_genes |
| chr17 | 1563966  | 1564146  | PRPF8 | 693_selected_genes |
| chr17 | 1564261  | 1564481  | PRPF8 | 693_selected_genes |
| chr17 | 1564539  | 1564725  | PRPF8 | 693_selected_genes |
| chr17 | 1564879  | 1565109  | PRPF8 | 693_selected_genes |
| chr17 | 1565174  | 1565472  | PRPF8 | 693_selected_genes |
| chr17 | 1576349  | 1576516  | PRPF8 | 693_selected_genes |
| chr17 | 1576625  | 1576886  | PRPF8 | 693_selected_genes |
| chr17 | 1577014  | 1577211  | PRPF8 | 693_selected_genes |
| chr17 | 1577710  | 1577999  | PRPF8 | 693_selected_genes |
| chr17 | 1578420  | 1578658  | PRPF8 | 693_selected_genes |
| chr17 | 1578888  | 1579131  | PRPF8 | 693_selected_genes |
| chr17 | 1579196  | 1579373  | PRPF8 | 693_selected_genes |
| chr17 | 1579475  | 1579689  | PRPF8 | 693_selected_genes |
| chr17 | 1579773  | 1580030  | PRPF8 | 693_selected_genes |
| chr17 | 1580244  | 1580491  | PRPF8 | 693_selected_genes |
| chr17 | 1580833  | 1581013  | PRPF8 | 693_selected_genes |
| chr17 | 1581786  | 1581971  | PRPF8 | 693_selected_genes |
| chr17 | 1582030  | 1582200  | PRPF8 | 693_selected_genes |
| chr17 | 1582285  | 1582525  | PRPF8 | 693_selected_genes |
| chr17 | 1582559  | 1582729  | PRPF8 | 693_selected_genes |
| chr17 | 1582877  | 1583118  | PRPF8 | 693_selected_genes |
| chr17 | 1583994  | 1584150  | PRPF8 | 693_selected_genes |
| chr17 | 1584197  | 1584373  | PRPF8 | 693_selected_genes |
| chr17 | 1584746  | 1585009  | PRPF8 | 693_selected_genes |
| chr17 | 1585088  | 1585357  | PRPF8 | 693_selected_genes |
| chr17 | 1585397  | 1585612  | PRPF8 | 693_selected_genes |
| chr17 | 1586801  | 1587020  | PRPF8 | 693_selected_genes |
| chr17 | 1587740  | 1587890  | PRPF8 | 693_selected_genes |
| chr16 | 31143304 | 31143681 | PRSS8 | 693_selected_genes |
| chr16 | 31143724 | 31143941 | PRSS8 | 693_selected_genes |
| chr16 | 31143977 | 31144299 | PRSS8 | 693_selected_genes |
| chr16 | 31144521 | 31144734 | PRSS8 | 693_selected_genes |
| chr16 | 31146449 | 31146517 | PRSS8 | 693_selected_genes |
| chr16 | 31146709 | 31146844 | PRSS8 | 693_selected_genes |
| chr19 | 40899847 | 40903902 | PRX   | 693_selected_genes |
| chr19 | 40904438 | 40904748 | PRX   | 693_selected_genes |
| chr19 | 40909587 | 40909794 | PRX   | 693_selected_genes |
| chr19 | 40913787 | 40913864 | PRX   | 693_selected_genes |
| chr9  | 15465492 | 15465603 | PSIP1 | 693_selected_genes |
| chr9  | 15466720 | 15466882 | PSIP1 | 693_selected_genes |
| chr9  | 15468602 | 15468866 | PSIP1 | 693_selected_genes |
| chr9  | 15468929 | 15469081 | PSIP1 | 693_selected_genes |
| chr9  | 15469238 | 15469359 | PSIP1 | 693_selected_genes |
| chr9  | 15469910 | 15470016 | PSIP1 | 693_selected_genes |

|       |           |           |        |                    |
|-------|-----------|-----------|--------|--------------------|
| chr9  | 15471070  | 15471254  | PSIP1  | 693_selected_genes |
| chr9  | 15471271  | 15471334  | PSIP1  | 693_selected_genes |
| chr9  | 15472604  | 15472773  | PSIP1  | 693_selected_genes |
| chr9  | 15473981  | 15474260  | PSIP1  | 693_selected_genes |
| chr9  | 15478449  | 15478575  | PSIP1  | 693_selected_genes |
| chr9  | 15479563  | 15479710  | PSIP1  | 693_selected_genes |
| chr9  | 15485978  | 15486091  | PSIP1  | 693_selected_genes |
| chr9  | 15486799  | 15486954  | PSIP1  | 693_selected_genes |
| chr9  | 15489958  | 15490147  | PSIP1  | 693_selected_genes |
| chr9  | 15506533  | 15506660  | PSIP1  | 693_selected_genes |
| chr9  | 15510089  | 15510211  | PSIP1  | 693_selected_genes |
| chr9  | 98209168  | 98209758  | PTCH1  | 693_selected_genes |
| chr9  | 98211325  | 98211630  | PTCH1  | 693_selected_genes |
| chr9  | 98212097  | 98212247  | PTCH1  | 693_selected_genes |
| chr9  | 98215734  | 98215927  | PTCH1  | 693_selected_genes |
| chr9  | 98218532  | 98218720  | PTCH1  | 693_selected_genes |
| chr9  | 98220269  | 98220600  | PTCH1  | 693_selected_genes |
| chr9  | 98221856  | 98222090  | PTCH1  | 693_selected_genes |
| chr9  | 98224112  | 98224305  | PTCH1  | 693_selected_genes |
| chr9  | 98229372  | 98229732  | PTCH1  | 693_selected_genes |
| chr9  | 98231007  | 98231460  | PTCH1  | 693_selected_genes |
| chr9  | 98232069  | 98232238  | PTCH1  | 693_selected_genes |
| chr9  | 98236304  | 98236450  | PTCH1  | 693_selected_genes |
| chr9  | 98238290  | 98238466  | PTCH1  | 693_selected_genes |
| chr9  | 98239015  | 98239164  | PTCH1  | 693_selected_genes |
| chr9  | 98239803  | 98240009  | PTCH1  | 693_selected_genes |
| chr9  | 98240311  | 98240493  | PTCH1  | 693_selected_genes |
| chr9  | 98241256  | 98241454  | PTCH1  | 693_selected_genes |
| chr9  | 98242225  | 98242397  | PTCH1  | 693_selected_genes |
| chr9  | 98242646  | 98242895  | PTCH1  | 693_selected_genes |
| chr9  | 98244201  | 98244347  | PTCH1  | 693_selected_genes |
| chr9  | 98244390  | 98244545  | PTCH1  | 693_selected_genes |
| chr9  | 98247941  | 98248181  | PTCH1  | 693_selected_genes |
| chr9  | 98268663  | 98268906  | PTCH1  | 693_selected_genes |
| chr9  | 98270417  | 98270668  | PTCH1  | 693_selected_genes |
| chr9  | 98278725  | 98278778  | PTCH1  | 693_selected_genes |
| chr9  | 98278879  | 98279127  | PTCH1  | 693_selected_genes |
| chr10 | 89623681  | 89624330  | PTEN   | 693_selected_genes |
| chr10 | 89653756  | 89653891  | PTEN   | 693_selected_genes |
| chr10 | 89685244  | 89685339  | PTEN   | 693_selected_genes |
| chr10 | 89690777  | 89690871  | PTEN   | 693_selected_genes |
| chr10 | 89692744  | 89693033  | PTEN   | 693_selected_genes |
| chr10 | 89711849  | 89712041  | PTEN   | 693_selected_genes |
| chr10 | 89717584  | 89717801  | PTEN   | 693_selected_genes |
| chr10 | 89720625  | 89720900  | PTEN   | 693_selected_genes |
| chr10 | 89725018  | 89725254  | PTEN   | 693_selected_genes |
| chr1  | 186643459 | 186643919 | PTGS2  | 693_selected_genes |
| chr1  | 186644355 | 186644553 | PTGS2  | 693_selected_genes |
| chr1  | 186645004 | 186645341 | PTGS2  | 693_selected_genes |
| chr1  | 186645573 | 186645870 | PTGS2  | 693_selected_genes |
| chr1  | 186645939 | 186646073 | PTGS2  | 693_selected_genes |
| chr1  | 186646755 | 186646987 | PTGS2  | 693_selected_genes |
| chr1  | 186647367 | 186647561 | PTGS2  | 693_selected_genes |
| chr1  | 186648164 | 186648358 | PTGS2  | 693_selected_genes |
| chr1  | 186648428 | 186648595 | PTGS2  | 693_selected_genes |
| chr1  | 186649345 | 186649447 | PTGS2  | 693_selected_genes |
| chr12 | 112856890 | 112856954 | PTPN11 | 693_selected_genes |
| chr12 | 112884054 | 112884227 | PTPN11 | 693_selected_genes |
| chr12 | 112888096 | 112888341 | PTPN11 | 693_selected_genes |
| chr12 | 112890973 | 112891216 | PTPN11 | 693_selected_genes |
| chr12 | 112892342 | 112892509 | PTPN11 | 693_selected_genes |
| chr12 | 112893728 | 112893892 | PTPN11 | 693_selected_genes |
| chr12 | 112895069 | 112895155 | PTPN11 | 693_selected_genes |
| chr12 | 112910722 | 112910869 | PTPN11 | 693_selected_genes |
| chr12 | 112915429 | 112915559 | PTPN11 | 693_selected_genes |
| chr12 | 112915635 | 112915844 | PTPN11 | 693_selected_genes |
| chr12 | 112919852 | 112920034 | PTPN11 | 693_selected_genes |
| chr12 | 112924253 | 112924462 | PTPN11 | 693_selected_genes |
| chr12 | 112926221 | 112926339 | PTPN11 | 693_selected_genes |
| chr12 | 112926802 | 112927004 | PTPN11 | 693_selected_genes |
| chr12 | 112939922 | 112940085 | PTPN11 | 693_selected_genes |
| chr12 | 112942473 | 112942593 | PTPN11 | 693_selected_genes |
| chr1  | 198608373 | 198608496 | PTPRC  | 693_selected_genes |
| chr1  | 198661450 | 198661538 | PTPRC  | 693_selected_genes |
| chr1  | 198663121 | 198663335 | PTPRC  | 693_selected_genes |
| chr1  | 198665815 | 198666063 | PTPRC  | 693_selected_genes |
| chr1  | 198668667 | 198668858 | PTPRC  | 693_selected_genes |
| chr1  | 198671490 | 198671684 | PTPRC  | 693_selected_genes |
| chr1  | 198672401 | 198672526 | PTPRC  | 693_selected_genes |
| chr1  | 198673575 | 198673652 | PTPRC  | 693_selected_genes |
| chr1  | 198675837 | 198676106 | PTPRC  | 693_selected_genes |
| chr1  | 198677236 | 198677415 | PTPRC  | 693_selected_genes |
| chr1  | 198678790 | 198678978 | PTPRC  | 693_selected_genes |
| chr1  | 198682056 | 198682226 | PTPRC  | 693_selected_genes |

|       |           |           |       |                    |
|-------|-----------|-----------|-------|--------------------|
| chr1  | 198685785 | 198685994 | PTPRC | 693_selected_genes |
| chr1  | 198687197 | 198687456 | PTPRC | 693_selected_genes |
| chr1  | 198691519 | 198691630 | PTPRC | 693_selected_genes |
| chr1  | 198697443 | 198697602 | PTPRC | 693_selected_genes |
| chr1  | 198698240 | 198698325 | PTPRC | 693_selected_genes |
| chr1  | 198700720 | 198700880 | PTPRC | 693_selected_genes |
| chr1  | 198701403 | 198701544 | PTPRC | 693_selected_genes |
| chr1  | 198701583 | 198701710 | PTPRC | 693_selected_genes |
| chr1  | 198703299 | 198703386 | PTPRC | 693_selected_genes |
| chr1  | 198703431 | 198703579 | PTPRC | 693_selected_genes |
| chr1  | 198704230 | 198704406 | PTPRC | 693_selected_genes |
| chr1  | 198710972 | 198711180 | PTPRC | 693_selected_genes |
| chr1  | 198711335 | 198711521 | PTPRC | 693_selected_genes |
| chr1  | 198713157 | 198713357 | PTPRC | 693_selected_genes |
| chr1  | 198717212 | 198717353 | PTPRC | 693_selected_genes |
| chr1  | 198718519 | 198718703 | PTPRC | 693_selected_genes |
| chr1  | 198719595 | 198719780 | PTPRC | 693_selected_genes |
| chr1  | 198721352 | 198721525 | PTPRC | 693_selected_genes |
| chr1  | 198721697 | 198721926 | PTPRC | 693_selected_genes |
| chr1  | 198723372 | 198723558 | PTPRC | 693_selected_genes |
| chr1  | 198725009 | 198725335 | PTPRC | 693_selected_genes |
| chr9  | 8317848   | 8317967   | PTPRD | 693_selected_genes |
| chr9  | 8319805   | 8319991   | PTPRD | 693_selected_genes |
| chr9  | 8331556   | 8331761   | PTPRD | 693_selected_genes |
| chr9  | 8338896   | 8339072   | PTPRD | 693_selected_genes |
| chr9  | 8340317   | 8340494   | PTPRD | 693_selected_genes |
| chr9  | 8341064   | 8341293   | PTPRD | 693_selected_genes |
| chr9  | 8341667   | 8342003   | PTPRD | 693_selected_genes |
| chr9  | 8375910   | 8376115   | PTPRD | 693_selected_genes |
| chr9  | 8376581   | 8376751   | PTPRD | 693_selected_genes |
| chr9  | 8389206   | 8389432   | PTPRD | 693_selected_genes |
| chr9  | 8404511   | 8404685   | PTPRD | 693_selected_genes |
| chr9  | 8436566   | 8436714   | PTPRD | 693_selected_genes |
| chr9  | 8437172   | 8437264   | PTPRD | 693_selected_genes |
| chr9  | 8449699   | 8449870   | PTPRD | 693_selected_genes |
| chr9  | 8454554   | 8454619   | PTPRD | 693_selected_genes |
| chr9  | 8460251   | 8460305   | PTPRD | 693_selected_genes |
| chr9  | 8460385   | 8460596   | PTPRD | 693_selected_genes |
| chr9  | 8465440   | 8465700   | PTPRD | 693_selected_genes |
| chr9  | 8470969   | 8471110   | PTPRD | 693_selected_genes |
| chr9  | 8484093   | 8484403   | PTPRD | 693_selected_genes |
| chr9  | 8485201   | 8485352   | PTPRD | 693_selected_genes |
| chr9  | 8485736   | 8486374   | PTPRD | 693_selected_genes |
| chr9  | 8492836   | 8493004   | PTPRD | 693_selected_genes |
| chr9  | 8497216   | 8497293   | PTPRD | 693_selected_genes |
| chr9  | 8499621   | 8499865   | PTPRD | 693_selected_genes |
| chr9  | 8500728   | 8501084   | PTPRD | 693_selected_genes |
| chr9  | 8504235   | 8504430   | PTPRD | 693_selected_genes |
| chr9  | 8507275   | 8507459   | PTPRD | 693_selected_genes |
| chr9  | 8517822   | 8518454   | PTPRD | 693_selected_genes |
| chr9  | 8521251   | 8521571   | PTPRD | 693_selected_genes |
| chr9  | 8523487   | 8523549   | PTPRD | 693_selected_genes |
| chr9  | 8524753   | 8524815   | PTPRD | 693_selected_genes |
| chr9  | 8524899   | 8525071   | PTPRD | 693_selected_genes |
| chr9  | 8526601   | 8526669   | PTPRD | 693_selected_genes |
| chr9  | 8527319   | 8527378   | PTPRD | 693_selected_genes |
| chr9  | 8528399   | 8528517   | PTPRD | 693_selected_genes |
| chr9  | 8528555   | 8528804   | PTPRD | 693_selected_genes |
| chr9  | 8633291   | 8633483   | PTPRD | 693_selected_genes |
| chr9  | 8636673   | 8636869   | PTPRD | 693_selected_genes |
| chr9  | 8733754   | 8733868   | PTPRD | 693_selected_genes |
| chr19 | 5206759   | 5206878   | PTPRS | 693_selected_genes |
| chr19 | 5207907   | 5208093   | PTPRS | 693_selected_genes |
| chr19 | 5208222   | 5208427   | PTPRS | 693_selected_genes |
| chr19 | 5210454   | 5210630   | PTPRS | 693_selected_genes |
| chr19 | 5210664   | 5210841   | PTPRS | 693_selected_genes |
| chr19 | 5211575   | 5211804   | PTPRS | 693_selected_genes |
| chr19 | 5211950   | 5212286   | PTPRS | 693_selected_genes |
| chr19 | 5212322   | 5212527   | PTPRS | 693_selected_genes |
| chr19 | 5214346   | 5214516   | PTPRS | 693_selected_genes |
| chr19 | 5214546   | 5214772   | PTPRS | 693_selected_genes |
| chr19 | 5215274   | 5215448   | PTPRS | 693_selected_genes |
| chr19 | 5215483   | 5215631   | PTPRS | 693_selected_genes |
| chr19 | 5216705   | 5216803   | PTPRS | 693_selected_genes |
| chr19 | 5218405   | 5218570   | PTPRS | 693_selected_genes |
| chr19 | 5218772   | 5218834   | PTPRS | 693_selected_genes |
| chr19 | 5219284   | 5219503   | PTPRS | 693_selected_genes |
| chr19 | 5219924   | 5220190   | PTPRS | 693_selected_genes |
| chr19 | 5220245   | 5220389   | PTPRS | 693_selected_genes |
| chr19 | 5220985   | 5221289   | PTPRS | 693_selected_genes |
| chr19 | 5222108   | 5222256   | PTPRS | 693_selected_genes |
| chr19 | 5222674   | 5223333   | PTPRS | 693_selected_genes |
| chr19 | 5225712   | 5225880   | PTPRS | 693_selected_genes |
| chr19 | 5229301   | 5229378   | PTPRS | 693_selected_genes |

|       |           |           |       |                    |
|-------|-----------|-----------|-------|--------------------|
| chr19 | 5229476   | 5229720   | PTPRS | 693_selected_genes |
| chr19 | 5231295   | 5231651   | PTPRS | 693_selected_genes |
| chr19 | 5238904   | 5239099   | PTPRS | 693_selected_genes |
| chr19 | 5240184   | 5240368   | PTPRS | 693_selected_genes |
| chr19 | 5243886   | 5244518   | PTPRS | 693_selected_genes |
| chr19 | 5245761   | 5246081   | PTPRS | 693_selected_genes |
| chr19 | 5256093   | 5256155   | PTPRS | 693_selected_genes |
| chr19 | 5258002   | 5258190   | PTPRS | 693_selected_genes |
| chr19 | 5260790   | 5260858   | PTPRS | 693_selected_genes |
| chr19 | 5262949   | 5263016   | PTPRS | 693_selected_genes |
| chr19 | 5264993   | 5265232   | PTPRS | 693_selected_genes |
| chr19 | 5273304   | 5273362   | PTPRS | 693_selected_genes |
| chr19 | 5273427   | 5273619   | PTPRS | 693_selected_genes |
| chr19 | 5274184   | 5274380   | PTPRS | 693_selected_genes |
| chr19 | 5286035   | 5286176   | PTPRS | 693_selected_genes |
| chr20 | 40709493  | 40709597  | PTPRT | 693_selected_genes |
| chr20 | 40710496  | 40710682  | PTPRT | 693_selected_genes |
| chr20 | 40713296  | 40713510  | PTPRT | 693_selected_genes |
| chr20 | 40714342  | 40714518  | PTPRT | 693_selected_genes |
| chr20 | 40727035  | 40727217  | PTPRT | 693_selected_genes |
| chr20 | 40730738  | 40730962  | PTPRT | 693_selected_genes |
| chr20 | 40733183  | 40733383  | PTPRT | 693_selected_genes |
| chr20 | 40735400  | 40735586  | PTPRT | 693_selected_genes |
| chr20 | 40738947  | 40739152  | PTPRT | 693_selected_genes |
| chr20 | 40743813  | 40743980  | PTPRT | 693_selected_genes |
| chr20 | 40744653  | 40744763  | PTPRT | 693_selected_genes |
| chr20 | 40747017  | 40747165  | PTPRT | 693_selected_genes |
| chr20 | 40748549  | 40748636  | PTPRT | 693_selected_genes |
| chr20 | 40757368  | 40757495  | PTPRT | 693_selected_genes |
| chr20 | 40770529  | 40770667  | PTPRT | 693_selected_genes |
| chr20 | 40789966  | 40790207  | PTPRT | 693_selected_genes |
| chr20 | 40827854  | 40828062  | PTPRT | 693_selected_genes |
| chr20 | 40864843  | 40864923  | PTPRT | 693_selected_genes |
| chr20 | 40877301  | 40877487  | PTPRT | 693_selected_genes |
| chr20 | 40899011  | 40899118  | PTPRT | 693_selected_genes |
| chr20 | 40911103  | 40911190  | PTPRT | 693_selected_genes |
| chr20 | 40944337  | 40944661  | PTPRT | 693_selected_genes |
| chr20 | 40979242  | 40979395  | PTPRT | 693_selected_genes |
| chr20 | 40980698  | 40980950  | PTPRT | 693_selected_genes |
| chr20 | 41076834  | 41076994  | PTPRT | 693_selected_genes |
| chr20 | 41100880  | 41101227  | PTPRT | 693_selected_genes |
| chr20 | 41306480  | 41306824  | PTPRT | 693_selected_genes |
| chr20 | 41385076  | 41385301  | PTPRT | 693_selected_genes |
| chr20 | 41400049  | 41400215  | PTPRT | 693_selected_genes |
| chr20 | 41408832  | 41408964  | PTPRT | 693_selected_genes |
| chr20 | 41419809  | 41420131  | PTPRT | 693_selected_genes |
| chr20 | 41514421  | 41514597  | PTPRT | 693_selected_genes |
| chr20 | 41818260  | 41818398  | PTPRT | 693_selected_genes |
| chr6  | 163836200 | 163836392 | QKI   | 693_selected_genes |
| chr6  | 163876285 | 163876478 | QKI   | 693_selected_genes |
| chr6  | 163878387 | 163878443 | QKI   | 693_selected_genes |
| chr6  | 163899786 | 163899953 | QKI   | 693_selected_genes |
| chr6  | 163955988 | 163956182 | QKI   | 693_selected_genes |
| chr6  | 163982988 | 163983126 | QKI   | 693_selected_genes |
| chr6  | 163984426 | 163984802 | QKI   | 693_selected_genes |
| chr6  | 163985673 | 163985767 | QKI   | 693_selected_genes |
| chr6  | 163986952 | 163987028 | QKI   | 693_selected_genes |
| chr6  | 163987727 | 163987852 | QKI   | 693_selected_genes |
| chr6  | 163990444 | 163990541 | QKI   | 693_selected_genes |
| chr6  | 163991700 | 163991767 | QKI   | 693_selected_genes |
| chr7  | 6414341   | 6414426   | RAC1  | 693_selected_genes |
| chr7  | 6426817   | 6426939   | RAC1  | 693_selected_genes |
| chr7  | 6431529   | 6431697   | RAC1  | 693_selected_genes |
| chr7  | 6438267   | 6438374   | RAC1  | 693_selected_genes |
| chr7  | 6439731   | 6439844   | RAC1  | 693_selected_genes |
| chr7  | 6441473   | 6441683   | RAC1  | 693_selected_genes |
| chr7  | 6441921   | 6442102   | RAC1  | 693_selected_genes |
| chr8  | 117859713 | 117859955 | RAD21 | 693_selected_genes |
| chr8  | 117861159 | 117861293 | RAD21 | 693_selected_genes |
| chr8  | 117862831 | 117863031 | RAD21 | 693_selected_genes |
| chr8  | 117864161 | 117864360 | RAD21 | 693_selected_genes |
| chr8  | 117864762 | 117864972 | RAD21 | 693_selected_genes |
| chr8  | 117866458 | 117866732 | RAD21 | 693_selected_genes |
| chr8  | 117868379 | 117868552 | RAD21 | 693_selected_genes |
| chr8  | 117868859 | 117869035 | RAD21 | 693_selected_genes |
| chr8  | 117869480 | 117869737 | RAD21 | 693_selected_genes |
| chr8  | 117870565 | 117870722 | RAD21 | 693_selected_genes |
| chr8  | 117874054 | 117874204 | RAD21 | 693_selected_genes |
| chr8  | 117875343 | 117875523 | RAD21 | 693_selected_genes |
| chr8  | 117878799 | 117878993 | RAD21 | 693_selected_genes |
| chr5  | 131892991 | 131893170 | RAD50 | 693_selected_genes |
| chr5  | 131894950 | 131895084 | RAD50 | 693_selected_genes |
| chr5  | 131911443 | 131911645 | RAD50 | 693_selected_genes |
| chr5  | 131914983 | 131915219 | RAD50 | 693_selected_genes |

|       |           |           |        |                    |
|-------|-----------|-----------|--------|--------------------|
| chr5  | 131915528 | 131915783 | RAD50  | 693_selected_genes |
| chr5  | 131923228 | 131923407 | RAD50  | 693_selected_genes |
| chr5  | 131923590 | 131923806 | RAD50  | 693_selected_genes |
| chr5  | 131924353 | 131924597 | RAD50  | 693_selected_genes |
| chr5  | 131925297 | 131925554 | RAD50  | 693_selected_genes |
| chr5  | 131926890 | 131927123 | RAD50  | 693_selected_genes |
| chr5  | 131927543 | 131927751 | RAD50  | 693_selected_genes |
| chr5  | 131928430 | 131928667 | RAD50  | 693_selected_genes |
| chr5  | 131930535 | 131930761 | RAD50  | 693_selected_genes |
| chr5  | 131931239 | 131931527 | RAD50  | 693_selected_genes |
| chr5  | 131938966 | 131939206 | RAD50  | 693_selected_genes |
| chr5  | 131939586 | 131939763 | RAD50  | 693_selected_genes |
| chr5  | 131940472 | 131940716 | RAD50  | 693_selected_genes |
| chr5  | 131944281 | 131944442 | RAD50  | 693_selected_genes |
| chr5  | 131944783 | 131944926 | RAD50  | 693_selected_genes |
| chr5  | 131944949 | 131945113 | RAD50  | 693_selected_genes |
| chr5  | 131951669 | 131951847 | RAD50  | 693_selected_genes |
| chr5  | 131953736 | 131954011 | RAD50  | 693_selected_genes |
| chr5  | 131972781 | 131972917 | RAD50  | 693_selected_genes |
| chr5  | 131973747 | 131973940 | RAD50  | 693_selected_genes |
| chr5  | 131976338 | 131976522 | RAD50  | 693_selected_genes |
| chr5  | 131977844 | 131978081 | RAD50  | 693_selected_genes |
| chr5  | 131978671 | 131978806 | RAD50  | 693_selected_genes |
| chr15 | 40990931  | 40991068  | RAD51  | 693_selected_genes |
| chr15 | 40993236  | 40993424  | RAD51  | 693_selected_genes |
| chr15 | 40993978  | 40994149  | RAD51  | 693_selected_genes |
| chr15 | 40998349  | 40998517  | RAD51  | 693_selected_genes |
| chr15 | 41001197  | 41001339  | RAD51  | 693_selected_genes |
| chr15 | 41010977  | 41011122  | RAD51  | 693_selected_genes |
| chr15 | 41020883  | 41021047  | RAD51  | 693_selected_genes |
| chr15 | 41021677  | 41021857  | RAD51  | 693_selected_genes |
| chr15 | 41022025  | 41022197  | RAD51  | 693_selected_genes |
| chr15 | 41023227  | 41023401  | RAD51  | 693_selected_genes |
| chr14 | 68290235  | 68290369  | RAD51B | 693_selected_genes |
| chr14 | 68292155  | 68292319  | RAD51B | 693_selected_genes |
| chr14 | 68301771  | 68301938  | RAD51B | 693_selected_genes |
| chr14 | 68331479  | 68331541  | RAD51B | 693_selected_genes |
| chr14 | 68331694  | 68331881  | RAD51B | 693_selected_genes |
| chr14 | 68352560  | 68352730  | RAD51B | 693_selected_genes |
| chr14 | 68353712  | 68353946  | RAD51B | 693_selected_genes |
| chr14 | 68758575  | 68758722  | RAD51B | 693_selected_genes |
| chr14 | 68878115  | 68878269  | RAD51B | 693_selected_genes |
| chr14 | 68934863  | 68934992  | RAD51B | 693_selected_genes |
| chr14 | 68937214  | 68937275  | RAD51B | 693_selected_genes |
| chr14 | 68944339  | 68944406  | RAD51B | 693_selected_genes |
| chr14 | 68963815  | 68963882  | RAD51B | 693_selected_genes |
| chr14 | 69061176  | 69061345  | RAD51B | 693_selected_genes |
| chr14 | 69077697  | 69077989  | RAD51B | 693_selected_genes |
| chr14 | 69117472  | 69117587  | RAD51B | 693_selected_genes |
| chr17 | 56769979  | 56770188  | RAD51C | 693_selected_genes |
| chr17 | 56772266  | 56772579  | RAD51C | 693_selected_genes |
| chr17 | 56774028  | 56774245  | RAD51C | 693_selected_genes |
| chr17 | 56780531  | 56780715  | RAD51C | 693_selected_genes |
| chr17 | 56783824  | 56783994  | RAD51C | 693_selected_genes |
| chr17 | 56787194  | 56787376  | RAD51C | 693_selected_genes |
| chr17 | 56798081  | 56798198  | RAD51C | 693_selected_genes |
| chr17 | 56801375  | 56801486  | RAD51C | 693_selected_genes |
| chr17 | 56809816  | 56809945  | RAD51C | 693_selected_genes |
| chr17 | 56811453  | 56811608  | RAD51C | 693_selected_genes |
| chr17 | 33427946  | 33428080  | RAD51D | 693_selected_genes |
| chr17 | 33428194  | 33428409  | RAD51D | 693_selected_genes |
| chr17 | 33430247  | 33430368  | RAD51D | 693_selected_genes |
| chr17 | 33430447  | 33430588  | RAD51D | 693_selected_genes |
| chr17 | 33433180  | 33433293  | RAD51D | 693_selected_genes |
| chr17 | 33433379  | 33433525  | RAD51D | 693_selected_genes |
| chr17 | 33433981  | 33434166  | RAD51D | 693_selected_genes |
| chr17 | 33434359  | 33434491  | RAD51D | 693_selected_genes |
| chr17 | 33443852  | 33444081  | RAD51D | 693_selected_genes |
| chr17 | 33445494  | 33445663  | RAD51D | 693_selected_genes |
| chr17 | 33446104  | 33446216  | RAD51D | 693_selected_genes |
| chr17 | 33446525  | 33446657  | RAD51D | 693_selected_genes |
| chr17 | 33446693  | 33446831  | RAD51D | 693_selected_genes |
| chr12 | 1022531   | 1022643   | RAD52  | 693_selected_genes |
| chr12 | 1023034   | 1023312   | RAD52  | 693_selected_genes |
| chr12 | 1023571   | 1023723   | RAD52  | 693_selected_genes |
| chr12 | 1025484   | 1025726   | RAD52  | 693_selected_genes |
| chr12 | 1025779   | 1026011   | RAD52  | 693_selected_genes |
| chr12 | 1034590   | 1034716   | RAD52  | 693_selected_genes |
| chr12 | 1035936   | 1036137   | RAD52  | 693_selected_genes |
| chr12 | 1036285   | 1036454   | RAD52  | 693_selected_genes |
| chr12 | 1038904   | 1039077   | RAD52  | 693_selected_genes |
| chr12 | 1039114   | 1039335   | RAD52  | 693_selected_genes |
| chr12 | 1040360   | 1040512   | RAD52  | 693_selected_genes |
| chr12 | 1042115   | 1042249   | RAD52  | 693_selected_genes |

|       |           |           |        |                    |
|-------|-----------|-----------|--------|--------------------|
| chr1  | 46714052  | 46714105  | RAD54L | 693_selected_genes |
| chr1  | 46714158  | 46714295  | RAD54L | 693_selected_genes |
| chr1  | 46715646  | 46715816  | RAD54L | 693_selected_genes |
| chr1  | 46724332  | 46724443  | RAD54L | 693_selected_genes |
| chr1  | 46725610  | 46725796  | RAD54L | 693_selected_genes |
| chr1  | 46726188  | 46726308  | RAD54L | 693_selected_genes |
| chr1  | 46726373  | 46726712  | RAD54L | 693_selected_genes |
| chr1  | 46726907  | 46727082  | RAD54L | 693_selected_genes |
| chr1  | 46733105  | 46733306  | RAD54L | 693_selected_genes |
| chr1  | 46736305  | 46736482  | RAD54L | 693_selected_genes |
| chr1  | 46738112  | 46738237  | RAD54L | 693_selected_genes |
| chr1  | 46738318  | 46738499  | RAD54L | 693_selected_genes |
| chr1  | 46739001  | 46739162  | RAD54L | 693_selected_genes |
| chr1  | 46739270  | 46739444  | RAD54L | 693_selected_genes |
| chr1  | 46739784  | 46739913  | RAD54L | 693_selected_genes |
| chr1  | 46740184  | 46740414  | RAD54L | 693_selected_genes |
| chr1  | 46743463  | 46743677  | RAD54L | 693_selected_genes |
| chr1  | 46743718  | 46743979  | RAD54L | 693_selected_genes |
| chr3  | 12625987  | 12626181  | RAF1   | 693_selected_genes |
| chr3  | 12626320  | 12626505  | RAF1   | 693_selected_genes |
| chr3  | 12626595  | 12626777  | RAF1   | 693_selected_genes |
| chr3  | 12627154  | 12627323  | RAF1   | 693_selected_genes |
| chr3  | 12629064  | 12629161  | RAF1   | 693_selected_genes |
| chr3  | 12632271  | 12632498  | RAF1   | 693_selected_genes |
| chr3  | 12633181  | 12633316  | RAF1   | 693_selected_genes |
| chr3  | 12641164  | 12641332  | RAF1   | 693_selected_genes |
| chr3  | 12641625  | 12641803  | RAF1   | 693_selected_genes |
| chr3  | 12641861  | 12641939  | RAF1   | 693_selected_genes |
| chr3  | 12644951  | 12645061  | RAF1   | 693_selected_genes |
| chr3  | 12645609  | 12645813  | RAF1   | 693_selected_genes |
| chr3  | 12647674  | 12647823  | RAF1   | 693_selected_genes |
| chr3  | 12650239  | 12650447  | RAF1   | 693_selected_genes |
| chr3  | 12650706  | 12650859  | RAF1   | 693_selected_genes |
| chr3  | 12653423  | 12653586  | RAF1   | 693_selected_genes |
| chr3  | 12659988  | 12660245  | RAF1   | 693_selected_genes |
| chr2  | 109336037 | 109336159 | RANBP2 | 693_selected_genes |
| chr2  | 109345562 | 109345680 | RANBP2 | 693_selected_genes |
| chr2  | 109347204 | 109347366 | RANBP2 | 693_selected_genes |
| chr2  | 109347752 | 109347956 | RANBP2 | 693_selected_genes |
| chr2  | 109351962 | 109352243 | RANBP2 | 693_selected_genes |
| chr2  | 109352534 | 109352730 | RANBP2 | 693_selected_genes |
| chr2  | 109356919 | 109357162 | RANBP2 | 693_selected_genes |
| chr2  | 109363141 | 109363279 | RANBP2 | 693_selected_genes |
| chr2  | 109365350 | 109365610 | RANBP2 | 693_selected_genes |
| chr2  | 109367694 | 109367926 | RANBP2 | 693_selected_genes |
| chr2  | 109367958 | 109368184 | RANBP2 | 693_selected_genes |
| chr2  | 109368301 | 109368475 | RANBP2 | 693_selected_genes |
| chr2  | 109369428 | 109369640 | RANBP2 | 693_selected_genes |
| chr2  | 109369856 | 109370044 | RANBP2 | 693_selected_genes |
| chr2  | 109370255 | 109370452 | RANBP2 | 693_selected_genes |
| chr2  | 109371335 | 109371565 | RANBP2 | 693_selected_genes |
| chr2  | 109371606 | 109371740 | RANBP2 | 693_selected_genes |
| chr2  | 109374843 | 109375029 | RANBP2 | 693_selected_genes |
| chr2  | 109378531 | 109378676 | RANBP2 | 693_selected_genes |
| chr2  | 109379667 | 109384869 | RANBP2 | 693_selected_genes |
| chr2  | 109388131 | 109388352 | RANBP2 | 693_selected_genes |
| chr2  | 109388919 | 109389062 | RANBP2 | 693_selected_genes |
| chr2  | 109389298 | 109389527 | RANBP2 | 693_selected_genes |
| chr2  | 109392162 | 109392417 | RANBP2 | 693_selected_genes |
| chr2  | 109393560 | 109393712 | RANBP2 | 693_selected_genes |
| chr2  | 109397699 | 109397910 | RANBP2 | 693_selected_genes |
| chr2  | 109398558 | 109398882 | RANBP2 | 693_selected_genes |
| chr2  | 109398958 | 109399343 | RANBP2 | 693_selected_genes |
| chr2  | 109400026 | 109400382 | RANBP2 | 693_selected_genes |
| chr17 | 38487445  | 38487673  | RARA   | 693_selected_genes |
| chr17 | 38497616  | 38497892  | RARA   | 693_selected_genes |
| chr17 | 38498931  | 38499144  | RARA   | 693_selected_genes |
| chr17 | 38504542  | 38504741  | RARA   | 693_selected_genes |
| chr17 | 38506010  | 38506202  | RARA   | 693_selected_genes |
| chr17 | 38507628  | 38507808  | RARA   | 693_selected_genes |
| chr17 | 38508136  | 38508347  | RARA   | 693_selected_genes |
| chr17 | 38508557  | 38508784  | RARA   | 693_selected_genes |
| chr17 | 38510528  | 38510783  | RARA   | 693_selected_genes |
| chr17 | 38511489  | 38511698  | RARA   | 693_selected_genes |
| chr17 | 38512235  | 38512503  | RARA   | 693_selected_genes |
| chr5  | 86564243  | 86564832  | RASA1  | 693_selected_genes |
| chr5  | 86564839  | 86564897  | RASA1  | 693_selected_genes |
| chr5  | 86565041  | 86565129  | RASA1  | 693_selected_genes |
| chr5  | 86626734  | 86626825  | RASA1  | 693_selected_genes |
| chr5  | 86627139  | 86627342  | RASA1  | 693_selected_genes |
| chr5  | 86628298  | 86628484  | RASA1  | 693_selected_genes |
| chr5  | 86629058  | 86629179  | RASA1  | 693_selected_genes |
| chr5  | 86633765  | 86633933  | RASA1  | 693_selected_genes |
| chr5  | 86637081  | 86637163  | RASA1  | 693_selected_genes |

|       |           |           |        |                    |
|-------|-----------|-----------|--------|--------------------|
| chr5  | 86642463  | 86642566  | RASA1  | 693_selected_genes |
| chr5  | 86645005  | 86645206  | RASA1  | 693_selected_genes |
| chr5  | 86648948  | 86649077  | RASA1  | 693_selected_genes |
| chr5  | 86658342  | 86658513  | RASA1  | 693_selected_genes |
| chr5  | 86659139  | 86659346  | RASA1  | 693_selected_genes |
| chr5  | 86662142  | 86662202  | RASA1  | 693_selected_genes |
| chr5  | 86665604  | 86665742  | RASA1  | 693_selected_genes |
| chr5  | 86667909  | 86668037  | RASA1  | 693_selected_genes |
| chr5  | 86669954  | 86670162  | RASA1  | 693_selected_genes |
| chr5  | 86670631  | 86670758  | RASA1  | 693_selected_genes |
| chr5  | 86672184  | 86672407  | RASA1  | 693_selected_genes |
| chr5  | 86672672  | 86672882  | RASA1  | 693_selected_genes |
| chr5  | 86674187  | 86674380  | RASA1  | 693_selected_genes |
| chr5  | 86675526  | 86675692  | RASA1  | 693_selected_genes |
| chr5  | 86676300  | 86676437  | RASA1  | 693_selected_genes |
| chr5  | 86679504  | 86679622  | RASA1  | 693_selected_genes |
| chr5  | 86681092  | 86681231  | RASA1  | 693_selected_genes |
| chr5  | 86682617  | 86682745  | RASA1  | 693_selected_genes |
| chr5  | 86685184  | 86685369  | RASA1  | 693_selected_genes |
| chr5  | 86686591  | 86686725  | RASA1  | 693_selected_genes |
| chr13 | 48878023  | 48878210  | RB1    | 693_selected_genes |
| chr13 | 48881390  | 48881567  | RB1    | 693_selected_genes |
| chr13 | 48916709  | 48916875  | RB1    | 693_selected_genes |
| chr13 | 48919190  | 48919360  | RB1    | 693_selected_genes |
| chr13 | 48921935  | 48922024  | RB1    | 693_selected_genes |
| chr13 | 48923066  | 48923184  | RB1    | 693_selected_genes |
| chr13 | 48934127  | 48934288  | RB1    | 693_selected_genes |
| chr13 | 48936925  | 48937118  | RB1    | 693_selected_genes |
| chr13 | 48939004  | 48939132  | RB1    | 693_selected_genes |
| chr13 | 48941604  | 48941764  | RB1    | 693_selected_genes |
| chr13 | 48942637  | 48942765  | RB1    | 693_selected_genes |
| chr13 | 48947515  | 48947653  | RB1    | 693_selected_genes |
| chr13 | 48951028  | 48951195  | RB1    | 693_selected_genes |
| chr13 | 48953704  | 48953811  | RB1    | 693_selected_genes |
| chr13 | 48954163  | 48954245  | RB1    | 693_selected_genes |
| chr13 | 48954275  | 48954402  | RB1    | 693_selected_genes |
| chr13 | 48955357  | 48955604  | RB1    | 693_selected_genes |
| chr13 | 49027103  | 49027272  | RB1    | 693_selected_genes |
| chr13 | 49030314  | 49030510  | RB1    | 693_selected_genes |
| chr13 | 49033798  | 49033994  | RB1    | 693_selected_genes |
| chr13 | 49037841  | 49037996  | RB1    | 693_selected_genes |
| chr13 | 49039108  | 49039272  | RB1    | 693_selected_genes |
| chr13 | 49039315  | 49039529  | RB1    | 693_selected_genes |
| chr13 | 49047470  | 49047551  | RB1    | 693_selected_genes |
| chr13 | 49050811  | 49051004  | RB1    | 693_selected_genes |
| chr13 | 49051465  | 49051565  | RB1    | 693_selected_genes |
| chr13 | 49054108  | 49054232  | RB1    | 693_selected_genes |
| chrX  | 47004820  | 47004940  | RBM10  | 693_selected_genes |
| chrX  | 47006730  | 47006922  | RBM10  | 693_selected_genes |
| chrX  | 47028688  | 47028922  | RBM10  | 693_selected_genes |
| chrX  | 47030401  | 47030682  | RBM10  | 693_selected_genes |
| chrX  | 47032501  | 47032621  | RBM10  | 693_selected_genes |
| chrX  | 47034392  | 47034516  | RBM10  | 693_selected_genes |
| chrX  | 47035873  | 47036010  | RBM10  | 693_selected_genes |
| chrX  | 47038476  | 47038587  | RBM10  | 693_selected_genes |
| chrX  | 47038692  | 47038919  | RBM10  | 693_selected_genes |
| chrX  | 47039253  | 47039464  | RBM10  | 693_selected_genes |
| chrX  | 47039585  | 47039733  | RBM10  | 693_selected_genes |
| chrX  | 47039792  | 47039930  | RBM10  | 693_selected_genes |
| chrX  | 47040588  | 47040825  | RBM10  | 693_selected_genes |
| chrX  | 47040880  | 47041070  | RBM10  | 693_selected_genes |
| chrX  | 47041122  | 47041290  | RBM10  | 693_selected_genes |
| chrX  | 47041324  | 47041466  | RBM10  | 693_selected_genes |
| chrX  | 47041535  | 47041750  | RBM10  | 693_selected_genes |
| chrX  | 47044428  | 47044628  | RBM10  | 693_selected_genes |
| chrX  | 47044675  | 47044791  | RBM10  | 693_selected_genes |
| chrX  | 47044815  | 47045054  | RBM10  | 693_selected_genes |
| chrX  | 47045089  | 47045214  | RBM10  | 693_selected_genes |
| chrX  | 47045438  | 47045595  | RBM10  | 693_selected_genes |
| chrX  | 47045631  | 47045811  | RBM10  | 693_selected_genes |
| chrX  | 47045847  | 47046023  | RBM10  | 693_selected_genes |
| chrX  | 135954428 | 135954529 | RBMX   | 693_selected_genes |
| chrX  | 135956275 | 135956636 | RBMX   | 693_selected_genes |
| chrX  | 135957193 | 135957352 | RBMX   | 693_selected_genes |
| chrX  | 135957391 | 135957567 | RBMX   | 693_selected_genes |
| chrX  | 135957604 | 135957769 | RBMX   | 693_selected_genes |
| chrX  | 135958636 | 135958839 | RBMX   | 693_selected_genes |
| chrX  | 135960048 | 135960270 | RBMX   | 693_selected_genes |
| chrX  | 135961150 | 135961342 | RBMX   | 693_selected_genes |
| chrX  | 135961452 | 135961615 | RBMX   | 693_selected_genes |
| chr8  | 145736788 | 145736963 | RECQL4 | 693_selected_genes |
| chr8  | 145737038 | 145737197 | RECQL4 | 693_selected_genes |
| chr8  | 145737268 | 145737475 | RECQL4 | 693_selected_genes |
| chr8  | 145737501 | 145737732 | RECQL4 | 693_selected_genes |

|       |           |           |        |                    |
|-------|-----------|-----------|--------|--------------------|
| chr8  | 145737749 | 145737969 | RECQL4 | 693_selected_genes |
| chr8  | 145737999 | 145738179 | RECQL4 | 693_selected_genes |
| chr8  | 145738204 | 145738546 | RECQL4 | 693_selected_genes |
| chr8  | 145738575 | 145738889 | RECQL4 | 693_selected_genes |
| chr8  | 145738929 | 145739121 | RECQL4 | 693_selected_genes |
| chr8  | 145739286 | 145739516 | RECQL4 | 693_selected_genes |
| chr8  | 145739547 | 145739771 | RECQL4 | 693_selected_genes |
| chr8  | 145739800 | 145739934 | RECQL4 | 693_selected_genes |
| chr8  | 145740294 | 145740481 | RECQL4 | 693_selected_genes |
| chr8  | 145740508 | 145740651 | RECQL4 | 693_selected_genes |
| chr8  | 145740684 | 145740866 | RECQL4 | 693_selected_genes |
| chr8  | 145741122 | 145741299 | RECQL4 | 693_selected_genes |
| chr8  | 145741346 | 145742173 | RECQL4 | 693_selected_genes |
| chr8  | 145742408 | 145742599 | RECQL4 | 693_selected_genes |
| chr8  | 145742772 | 145743044 | RECQL4 | 693_selected_genes |
| chr8  | 145743059 | 145743193 | RECQL4 | 693_selected_genes |
| chr2  | 61108950  | 61109010  | REL    | 693_selected_genes |
| chr2  | 61118792  | 61118985  | REL    | 693_selected_genes |
| chr2  | 61121506  | 61121705  | REL    | 693_selected_genes |
| chr2  | 61128101  | 61128243  | REL    | 693_selected_genes |
| chr2  | 61143986  | 61144177  | REL    | 693_selected_genes |
| chr2  | 61145300  | 61145455  | REL    | 693_selected_genes |
| chr2  | 61145503  | 61145766  | REL    | 693_selected_genes |
| chr2  | 61147150  | 61147269  | REL    | 693_selected_genes |
| chr2  | 61147492  | 61147638  | REL    | 693_selected_genes |
| chr2  | 61147683  | 61147802  | REL    | 693_selected_genes |
| chr2  | 61148872  | 61149695  | REL    | 693_selected_genes |
| chr10 | 43572681  | 43572804  | RET    | 693_selected_genes |
| chr10 | 43595881  | 43596195  | RET    | 693_selected_genes |
| chr10 | 43597764  | 43598102  | RET    | 693_selected_genes |
| chr10 | 43600374  | 43600666  | RET    | 693_selected_genes |
| chr10 | 43601798  | 43602044  | RET    | 693_selected_genes |
| chr10 | 43604453  | 43604703  | RET    | 693_selected_genes |
| chr10 | 43606629  | 43606938  | RET    | 693_selected_genes |
| chr10 | 43607521  | 43607697  | RET    | 693_selected_genes |
| chr10 | 43608275  | 43608436  | RET    | 693_selected_genes |
| chr10 | 43608978  | 43609148  | RET    | 693_selected_genes |
| chr10 | 43609902  | 43610209  | RET    | 693_selected_genes |
| chr10 | 43612006  | 43612204  | RET    | 693_selected_genes |
| chr10 | 43613795  | 43613953  | RET    | 693_selected_genes |
| chr10 | 43614953  | 43615218  | RET    | 693_selected_genes |
| chr10 | 43615503  | 43615676  | RET    | 693_selected_genes |
| chr10 | 43617368  | 43617489  | RET    | 693_selected_genes |
| chr10 | 43619093  | 43619281  | RET    | 693_selected_genes |
| chr10 | 43620305  | 43620455  | RET    | 693_selected_genes |
| chr10 | 43621997  | 43622227  | RET    | 693_selected_genes |
| chr10 | 43623534  | 43623742  | RET    | 693_selected_genes |
| chr1  | 175914263 | 175914331 | RFWD2  | 693_selected_genes |
| chr1  | 175916305 | 175916400 | RFWD2  | 693_selected_genes |
| chr1  | 175956053 | 175956264 | RFWD2  | 693_selected_genes |
| chr1  | 175957398 | 175957573 | RFWD2  | 693_selected_genes |
| chr1  | 175958472 | 175958640 | RFWD2  | 693_selected_genes |
| chr1  | 175996682 | 175996849 | RFWD2  | 693_selected_genes |
| chr1  | 176012296 | 176012428 | RFWD2  | 693_selected_genes |
| chr1  | 176012820 | 176012979 | RFWD2  | 693_selected_genes |
| chr1  | 176015291 | 176015485 | RFWD2  | 693_selected_genes |
| chr1  | 176050262 | 176050448 | RFWD2  | 693_selected_genes |
| chr1  | 176054886 | 176055051 | RFWD2  | 693_selected_genes |
| chr1  | 176085734 | 176085842 | RFWD2  | 693_selected_genes |
| chr1  | 176102957 | 176103061 | RFWD2  | 693_selected_genes |
| chr1  | 176104120 | 176104247 | RFWD2  | 693_selected_genes |
| chr1  | 176105598 | 176105708 | RFWD2  | 693_selected_genes |
| chr1  | 176118116 | 176118235 | RFWD2  | 693_selected_genes |
| chr1  | 176131979 | 176132149 | RFWD2  | 693_selected_genes |
| chr1  | 176132925 | 176133052 | RFWD2  | 693_selected_genes |
| chr1  | 176137794 | 176137909 | RFWD2  | 693_selected_genes |
| chr1  | 176145020 | 176145168 | RFWD2  | 693_selected_genes |
| chr1  | 176153743 | 176153853 | RFWD2  | 693_selected_genes |
| chr1  | 176175682 | 176176139 | RFWD2  | 693_selected_genes |
| chr17 | 74467689  | 74468159  | RHBDF2 | 693_selected_genes |
| chr17 | 74468191  | 74468277  | RHBDF2 | 693_selected_genes |
| chr17 | 74468742  | 74468946  | RHBDF2 | 693_selected_genes |
| chr17 | 74469061  | 74469212  | RHBDF2 | 693_selected_genes |
| chr17 | 74469308  | 74469434  | RHBDF2 | 693_selected_genes |
| chr17 | 74469704  | 74469849  | RHBDF2 | 693_selected_genes |
| chr17 | 74469895  | 74470009  | RHBDF2 | 693_selected_genes |
| chr17 | 74470089  | 74470249  | RHBDF2 | 693_selected_genes |
| chr17 | 74470429  | 74470641  | RHBDF2 | 693_selected_genes |
| chr17 | 74470786  | 74470911  | RHBDF2 | 693_selected_genes |
| chr17 | 74471086  | 74471248  | RHBDF2 | 693_selected_genes |
| chr17 | 74472886  | 74473131  | RHBDF2 | 693_selected_genes |
| chr17 | 74473236  | 74473405  | RHBDF2 | 693_selected_genes |
| chr17 | 74473713  | 74473892  | RHBDF2 | 693_selected_genes |
| chr17 | 74474862  | 74475116  | RHBDF2 | 693_selected_genes |

|       |           |           |        |                    |
|-------|-----------|-----------|--------|--------------------|
| chr17 | 74475138  | 74475384  | RHBDF2 | 693_selected_genes |
| chr17 | 74475789  | 74476048  | RHBDF2 | 693_selected_genes |
| chr17 | 74477431  | 74477631  | RHBDF2 | 693_selected_genes |
| chr7  | 151164179 | 151164322 | RHEB   | 693_selected_genes |
| chr7  | 151167631 | 151167763 | RHEB   | 693_selected_genes |
| chr7  | 151168454 | 151168552 | RHEB   | 693_selected_genes |
| chr7  | 151168609 | 151168716 | RHEB   | 693_selected_genes |
| chr7  | 151174393 | 151174526 | RHEB   | 693_selected_genes |
| chr7  | 151181797 | 151181915 | RHEB   | 693_selected_genes |
| chr7  | 151188003 | 151188125 | RHEB   | 693_selected_genes |
| chr7  | 151195149 | 151195291 | RHEB   | 693_selected_genes |
| chr7  | 151216520 | 151216622 | RHEB   | 693_selected_genes |
| chr3  | 49397616  | 49397840  | RHOA   | 693_selected_genes |
| chr3  | 49398335  | 49398524  | RHOA   | 693_selected_genes |
| chr3  | 49399903  | 49400084  | RHOA   | 693_selected_genes |
| chr3  | 49405835  | 49406006  | RHOA   | 693_selected_genes |
| chr3  | 49410647  | 49410800  | RHOA   | 693_selected_genes |
| chr3  | 49412841  | 49413047  | RHOA   | 693_selected_genes |
| chr5  | 38942380  | 38942505  | RICTOR | 693_selected_genes |
| chr5  | 38942909  | 38943098  | RICTOR | 693_selected_genes |
| chr5  | 38944522  | 38944696  | RICTOR | 693_selected_genes |
| chr5  | 38944989  | 38945195  | RICTOR | 693_selected_genes |
| chr5  | 38945567  | 38945851  | RICTOR | 693_selected_genes |
| chr5  | 38946544  | 38946679  | RICTOR | 693_selected_genes |
| chr5  | 38947340  | 38947568  | RICTOR | 693_selected_genes |
| chr5  | 38949432  | 38949554  | RICTOR | 693_selected_genes |
| chr5  | 38949788  | 38950847  | RICTOR | 693_selected_genes |
| chr5  | 38952272  | 38952552  | RICTOR | 693_selected_genes |
| chr5  | 38953061  | 38953218  | RICTOR | 693_selected_genes |
| chr5  | 38953537  | 38953680  | RICTOR | 693_selected_genes |
| chr5  | 38954850  | 38954988  | RICTOR | 693_selected_genes |
| chr5  | 38955671  | 38955831  | RICTOR | 693_selected_genes |
| chr5  | 38957728  | 38957857  | RICTOR | 693_selected_genes |
| chr5  | 38958519  | 38958646  | RICTOR | 693_selected_genes |
| chr5  | 38958743  | 38958958  | RICTOR | 693_selected_genes |
| chr5  | 38959271  | 38959448  | RICTOR | 693_selected_genes |
| chr5  | 38959855  | 38960105  | RICTOR | 693_selected_genes |
| chr5  | 38960474  | 38960660  | RICTOR | 693_selected_genes |
| chr5  | 38962391  | 38962488  | RICTOR | 693_selected_genes |
| chr5  | 38962561  | 38962713  | RICTOR | 693_selected_genes |
| chr5  | 38962952  | 38963168  | RICTOR | 693_selected_genes |
| chr5  | 38964868  | 38965019  | RICTOR | 693_selected_genes |
| chr5  | 38966717  | 38966848  | RICTOR | 693_selected_genes |
| chr5  | 38967237  | 38967354  | RICTOR | 693_selected_genes |
| chr5  | 38967413  | 38967554  | RICTOR | 693_selected_genes |
| chr5  | 38968019  | 38968157  | RICTOR | 693_selected_genes |
| chr5  | 38971953  | 38972086  | RICTOR | 693_selected_genes |
| chr5  | 38975613  | 38975731  | RICTOR | 693_selected_genes |
| chr5  | 38978659  | 38978777  | RICTOR | 693_selected_genes |
| chr5  | 38981943  | 38982163  | RICTOR | 693_selected_genes |
| chr5  | 38991025  | 38991202  | RICTOR | 693_selected_genes |
| chr5  | 38996895  | 38997009  | RICTOR | 693_selected_genes |
| chr5  | 39002611  | 39002793  | RICTOR | 693_selected_genes |
| chr5  | 39003634  | 39003749  | RICTOR | 693_selected_genes |
| chr5  | 39021115  | 39021263  | RICTOR | 693_selected_genes |
| chr5  | 39074187  | 39074285  | RICTOR | 693_selected_genes |
| chr5  | 39074405  | 39074504  | RICTOR | 693_selected_genes |
| chr1  | 155870153 | 155870434 | RIT1   | 693_selected_genes |
| chr1  | 155874076 | 155874318 | RIT1   | 693_selected_genes |
| chr1  | 155874368 | 155874426 | RIT1   | 693_selected_genes |
| chr1  | 155874496 | 155874620 | RIT1   | 693_selected_genes |
| chr1  | 155880215 | 155880322 | RIT1   | 693_selected_genes |
| chr1  | 155880421 | 155880620 | RIT1   | 693_selected_genes |
| chr1  | 155880643 | 155880701 | RIT1   | 693_selected_genes |
| chr17 | 56432278  | 56432372  | RNF43  | 693_selected_genes |
| chr17 | 56434501  | 56436209  | RNF43  | 693_selected_genes |
| chr17 | 56437484  | 56437637  | RNF43  | 693_selected_genes |
| chr17 | 56438118  | 56438330  | RNF43  | 693_selected_genes |
| chr17 | 56439879  | 56440034  | RNF43  | 693_selected_genes |
| chr17 | 56440610  | 56440792  | RNF43  | 693_selected_genes |
| chr17 | 56440861  | 56440986  | RNF43  | 693_selected_genes |
| chr17 | 56448246  | 56448419  | RNF43  | 693_selected_genes |
| chr17 | 56492661  | 56492963  | RNF43  | 693_selected_genes |
| chr6  | 117609629 | 117609990 | ROS1   | 693_selected_genes |
| chr6  | 117622111 | 117622325 | ROS1   | 693_selected_genes |
| chr6  | 117629931 | 117630116 | ROS1   | 693_selected_genes |
| chr6  | 117631218 | 117631469 | ROS1   | 693_selected_genes |
| chr6  | 117632157 | 117632305 | ROS1   | 693_selected_genes |
| chr6  | 117638280 | 117638460 | ROS1   | 693_selected_genes |
| chr6  | 117639325 | 117639440 | ROS1   | 693_selected_genes |
| chr6  | 117641005 | 117641218 | ROS1   | 693_selected_genes |
| chr6  | 117642396 | 117642582 | ROS1   | 693_selected_genes |
| chr6  | 117645469 | 117645603 | ROS1   | 693_selected_genes |
| chr6  | 117647361 | 117647602 | ROS1   | 693_selected_genes |

|       |           |           |       |                    |
|-------|-----------|-----------|-------|--------------------|
| chr6  | 117649944 | 117650001 | ROS1  | 693_selected_genes |
| chr6  | 117650466 | 117650634 | ROS1  | 693_selected_genes |
| chr6  | 117658309 | 117658528 | ROS1  | 693_selected_genes |
| chr6  | 117662272 | 117662499 | ROS1  | 693_selected_genes |
| chr6  | 117662537 | 117662820 | ROS1  | 693_selected_genes |
| chr6  | 117663537 | 117663732 | ROS1  | 693_selected_genes |
| chr6  | 117665197 | 117665450 | ROS1  | 693_selected_genes |
| chr6  | 117674127 | 117674357 | ROS1  | 693_selected_genes |
| chr6  | 117677766 | 117678103 | ROS1  | 693_selected_genes |
| chr6  | 117678941 | 117679197 | ROS1  | 693_selected_genes |
| chr6  | 117680946 | 117681199 | ROS1  | 693_selected_genes |
| chr6  | 117681479 | 117681593 | ROS1  | 693_selected_genes |
| chr6  | 117683740 | 117684053 | ROS1  | 693_selected_genes |
| chr6  | 117686197 | 117686392 | ROS1  | 693_selected_genes |
| chr6  | 117686718 | 117686929 | ROS1  | 693_selected_genes |
| chr6  | 117687213 | 117687478 | ROS1  | 693_selected_genes |
| chr6  | 117700196 | 117700347 | ROS1  | 693_selected_genes |
| chr6  | 117704454 | 117704696 | ROS1  | 693_selected_genes |
| chr6  | 117706820 | 117707049 | ROS1  | 693_selected_genes |
| chr6  | 117708026 | 117708187 | ROS1  | 693_selected_genes |
| chr6  | 117708917 | 117709222 | ROS1  | 693_selected_genes |
| chr6  | 117710487 | 117711034 | ROS1  | 693_selected_genes |
| chr6  | 117714361 | 117714509 | ROS1  | 693_selected_genes |
| chr6  | 117715299 | 117715534 | ROS1  | 693_selected_genes |
| chr6  | 117715753 | 117715926 | ROS1  | 693_selected_genes |
| chr6  | 117717325 | 117717452 | ROS1  | 693_selected_genes |
| chr6  | 117718052 | 117718304 | ROS1  | 693_selected_genes |
| chr6  | 117724276 | 117724465 | ROS1  | 693_selected_genes |
| chr6  | 117725417 | 117725616 | ROS1  | 693_selected_genes |
| chr6  | 117730719 | 117730830 | ROS1  | 693_selected_genes |
| chr6  | 117735656 | 117735733 | ROS1  | 693_selected_genes |
| chr6  | 117737395 | 117737505 | ROS1  | 693_selected_genes |
| chr6  | 117739599 | 117739694 | ROS1  | 693_selected_genes |
| chr6  | 117746671 | 117746844 | ROS1  | 693_selected_genes |
| chr17 | 1733362   | 1733445   | RPA1  | 693_selected_genes |
| chr17 | 1746071   | 1746172   | RPA1  | 693_selected_genes |
| chr17 | 1747188   | 1747317   | RPA1  | 693_selected_genes |
| chr17 | 1747846   | 1748005   | RPA1  | 693_selected_genes |
| chr17 | 1756369   | 1756508   | RPA1  | 693_selected_genes |
| chr17 | 1775702   | 1775845   | RPA1  | 693_selected_genes |
| chr17 | 1778929   | 1779112   | RPA1  | 693_selected_genes |
| chr17 | 1780480   | 1780633   | RPA1  | 693_selected_genes |
| chr17 | 1782261   | 1782380   | RPA1  | 693_selected_genes |
| chr17 | 1782483   | 1782726   | RPA1  | 693_selected_genes |
| chr17 | 1782828   | 1783018   | RPA1  | 693_selected_genes |
| chr17 | 1783811   | 1784010   | RPA1  | 693_selected_genes |
| chr17 | 1787080   | 1787263   | RPA1  | 693_selected_genes |
| chr17 | 1791943   | 1792170   | RPA1  | 693_selected_genes |
| chr17 | 1795101   | 1795259   | RPA1  | 693_selected_genes |
| chr17 | 1798277   | 1798414   | RPA1  | 693_selected_genes |
| chr17 | 1800339   | 1800494   | RPA1  | 693_selected_genes |
| chrX  | 38128853  | 38129110  | RPGR  | 693_selected_genes |
| chrX  | 38132613  | 38132755  | RPGR  | 693_selected_genes |
| chrX  | 38134316  | 38134424  | RPGR  | 693_selected_genes |
| chrX  | 38135814  | 38136050  | RPGR  | 693_selected_genes |
| chrX  | 38138397  | 38138483  | RPGR  | 693_selected_genes |
| chrX  | 38144767  | 38147319  | RPGR  | 693_selected_genes |
| chrX  | 38150186  | 38150302  | RPGR  | 693_selected_genes |
| chrX  | 38150620  | 38150762  | RPGR  | 693_selected_genes |
| chrX  | 38156511  | 38156730  | RPGR  | 693_selected_genes |
| chrX  | 38157597  | 38157725  | RPGR  | 693_selected_genes |
| chrX  | 38158183  | 38158419  | RPGR  | 693_selected_genes |
| chrX  | 38160474  | 38160649  | RPGR  | 693_selected_genes |
| chrX  | 38163862  | 38164068  | RPGR  | 693_selected_genes |
| chrX  | 38169842  | 38170051  | RPGR  | 693_selected_genes |
| chrX  | 38176543  | 38176743  | RPGR  | 693_selected_genes |
| chrX  | 38178056  | 38178265  | RPGR  | 693_selected_genes |
| chrX  | 38180254  | 38180367  | RPGR  | 693_selected_genes |
| chrX  | 38182080  | 38182223  | RPGR  | 693_selected_genes |
| chrX  | 38182626  | 38182802  | RPGR  | 693_selected_genes |
| chrX  | 38186567  | 38186645  | RPGR  | 693_selected_genes |
| chr1  | 6241502   | 6241571   | RPL22 | 693_selected_genes |
| chr1  | 6246706   | 6246901   | RPL22 | 693_selected_genes |
| chr1  | 6252961   | 6253139   | RPL22 | 693_selected_genes |
| chr1  | 6257686   | 6257841   | RPL22 | 693_selected_genes |
| chr1  | 6259596   | 6259658   | RPL22 | 693_selected_genes |
| chr1  | 93297646  | 93297699  | RPL5  | 693_selected_genes |
| chr1  | 93298920  | 93299040  | RPL5  | 693_selected_genes |
| chr1  | 93299076  | 93299242  | RPL5  | 693_selected_genes |
| chr1  | 93299327  | 93299380  | RPL5  | 693_selected_genes |
| chr1  | 93300310  | 93300495  | RPL5  | 693_selected_genes |
| chr1  | 93301721  | 93301978  | RPL5  | 693_selected_genes |
| chr1  | 93302987  | 93303215  | RPL5  | 693_selected_genes |
| chr1  | 93306082  | 93306221  | RPL5  | 693_selected_genes |

|       |          |          |         |                    |
|-------|----------|----------|---------|--------------------|
| chr1  | 93307297 | 93307447 | RPL5    | 693_selected_genes |
| chr19 | 1438399  | 1438686  | RPS15   | 693_selected_genes |
| chr19 | 1438780  | 1438916  | RPS15   | 693_selected_genes |
| chr19 | 1439941  | 1440486  | RPS15   | 693_selected_genes |
| chr11 | 64126682 | 64126787 | RPS6KA4 | 693_selected_genes |
| chr11 | 64126824 | 64126946 | RPS6KA4 | 693_selected_genes |
| chr11 | 64127609 | 64127878 | RPS6KA4 | 693_selected_genes |
| chr11 | 64127923 | 64128089 | RPS6KA4 | 693_selected_genes |
| chr11 | 64128580 | 64128738 | RPS6KA4 | 693_selected_genes |
| chr11 | 64128915 | 64129046 | RPS6KA4 | 693_selected_genes |
| chr11 | 64129088 | 64129242 | RPS6KA4 | 693_selected_genes |
| chr11 | 64129298 | 64129499 | RPS6KA4 | 693_selected_genes |
| chr11 | 64132747 | 64132962 | RPS6KA4 | 693_selected_genes |
| chr11 | 64135578 | 64135757 | RPS6KA4 | 693_selected_genes |
| chr11 | 64135914 | 64136098 | RPS6KA4 | 693_selected_genes |
| chr11 | 64136150 | 64136294 | RPS6KA4 | 693_selected_genes |
| chr11 | 64136892 | 64137116 | RPS6KA4 | 693_selected_genes |
| chr11 | 64137145 | 64137390 | RPS6KA4 | 693_selected_genes |
| chr11 | 64137671 | 64137881 | RPS6KA4 | 693_selected_genes |
| chr11 | 64138009 | 64138223 | RPS6KA4 | 693_selected_genes |
| chr11 | 64138729 | 64138977 | RPS6KA4 | 693_selected_genes |
| chr11 | 67195991 | 67196119 | RPS6KB2 | 693_selected_genes |
| chr11 | 67196358 | 67196518 | RPS6KB2 | 693_selected_genes |
| chr11 | 67196565 | 67196736 | RPS6KB2 | 693_selected_genes |
| chr11 | 67196972 | 67197091 | RPS6KB2 | 693_selected_genes |
| chr11 | 67198813 | 67199011 | RPS6KB2 | 693_selected_genes |
| chr11 | 67199798 | 67199856 | RPS6KB2 | 693_selected_genes |
| chr11 | 67200045 | 67200153 | RPS6KB2 | 693_selected_genes |
| chr11 | 67200182 | 67200333 | RPS6KB2 | 693_selected_genes |
| chr11 | 67200397 | 67200538 | RPS6KB2 | 693_selected_genes |
| chr11 | 67200571 | 67200712 | RPS6KB2 | 693_selected_genes |
| chr11 | 67200785 | 67200943 | RPS6KB2 | 693_selected_genes |
| chr11 | 67201440 | 67201553 | RPS6KB2 | 693_selected_genes |
| chr11 | 67201643 | 67201771 | RPS6KB2 | 693_selected_genes |
| chr11 | 67201822 | 67201980 | RPS6KB2 | 693_selected_genes |
| chr11 | 67202027 | 67202190 | RPS6KB2 | 693_selected_genes |
| chr11 | 67202434 | 67202665 | RPS6KB2 | 693_selected_genes |
| chr17 | 78519404 | 78519616 | RPTOR   | 693_selected_genes |
| chr17 | 78599465 | 78599618 | RPTOR   | 693_selected_genes |
| chr17 | 78617502 | 78617635 | RPTOR   | 693_selected_genes |
| chr17 | 78681615 | 78681824 | RPTOR   | 693_selected_genes |
| chr17 | 78704334 | 78704531 | RPTOR   | 693_selected_genes |
| chr17 | 78727784 | 78728010 | RPTOR   | 693_selected_genes |
| chr17 | 78765224 | 78765334 | RPTOR   | 693_selected_genes |
| chr17 | 78795975 | 78796126 | RPTOR   | 693_selected_genes |
| chr17 | 78796853 | 78797052 | RPTOR   | 693_selected_genes |
| chr17 | 78811696 | 78811822 | RPTOR   | 693_selected_genes |
| chr17 | 78820247 | 78820399 | RPTOR   | 693_selected_genes |
| chr17 | 78829238 | 78829372 | RPTOR   | 693_selected_genes |
| chr17 | 78831564 | 78831761 | RPTOR   | 693_selected_genes |
| chr17 | 78854189 | 78854314 | RPTOR   | 693_selected_genes |
| chr17 | 78857193 | 78857309 | RPTOR   | 693_selected_genes |
| chr17 | 78857555 | 78857797 | RPTOR   | 693_selected_genes |
| chr17 | 78858782 | 78858973 | RPTOR   | 693_selected_genes |
| chr17 | 78865494 | 78865662 | RPTOR   | 693_selected_genes |
| chr17 | 78866503 | 78866694 | RPTOR   | 693_selected_genes |
| chr17 | 78867481 | 78867690 | RPTOR   | 693_selected_genes |
| chr17 | 78882585 | 78882754 | RPTOR   | 693_selected_genes |
| chr17 | 78896498 | 78896652 | RPTOR   | 693_selected_genes |
| chr17 | 78897264 | 78897918 | RPTOR   | 693_selected_genes |
| chr17 | 78899144 | 78899305 | RPTOR   | 693_selected_genes |
| chr17 | 78914270 | 78914426 | RPTOR   | 693_selected_genes |
| chr17 | 78919441 | 78919606 | RPTOR   | 693_selected_genes |
| chr17 | 78921001 | 78921176 | RPTOR   | 693_selected_genes |
| chr17 | 78923217 | 78923372 | RPTOR   | 693_selected_genes |
| chr17 | 78931398 | 78931555 | RPTOR   | 693_selected_genes |
| chr17 | 78933852 | 78934030 | RPTOR   | 693_selected_genes |
| chr17 | 78935168 | 78935305 | RPTOR   | 693_selected_genes |
| chr17 | 78936235 | 78936402 | RPTOR   | 693_selected_genes |
| chr17 | 78936702 | 78936882 | RPTOR   | 693_selected_genes |
| chr17 | 78938036 | 78938155 | RPTOR   | 693_selected_genes |
| chr21 | 36164406 | 36164932 | RUNX1   | 693_selected_genes |
| chr21 | 36171572 | 36171784 | RUNX1   | 693_selected_genes |
| chr21 | 36193939 | 36194018 | RUNX1   | 693_selected_genes |
| chr21 | 36206681 | 36206923 | RUNX1   | 693_selected_genes |
| chr21 | 36228684 | 36228769 | RUNX1   | 693_selected_genes |
| chr21 | 36231745 | 36231900 | RUNX1   | 693_selected_genes |
| chr21 | 36252828 | 36253035 | RUNX1   | 693_selected_genes |
| chr21 | 36259114 | 36259434 | RUNX1   | 693_selected_genes |
| chr21 | 36261948 | 36262059 | RUNX1   | 693_selected_genes |
| chr21 | 36265196 | 36265285 | RUNX1   | 693_selected_genes |
| chr21 | 36421113 | 36421221 | RUNX1   | 693_selected_genes |
| chr8  | 92972444 | 92972770 | RUNX1T1 | 693_selected_genes |
| chr8  | 92982860 | 92983101 | RUNX1T1 | 693_selected_genes |

|       |           |           |         |                    |
|-------|-----------|-----------|---------|--------------------|
| chr8  | 92988107  | 92988226  | RUNX1T1 | 693_selected_genes |
| chr8  | 92992129  | 92992184  | RUNX1T1 | 693_selected_genes |
| chr8  | 92998326  | 92998578  | RUNX1T1 | 693_selected_genes |
| chr8  | 92999089  | 92999225  | RUNX1T1 | 693_selected_genes |
| chr8  | 93003841  | 93004142  | RUNX1T1 | 693_selected_genes |
| chr8  | 93006793  | 93006876  | RUNX1T1 | 693_selected_genes |
| chr8  | 93015532  | 93015633  | RUNX1T1 | 693_selected_genes |
| chr8  | 93017314  | 93017550  | RUNX1T1 | 693_selected_genes |
| chr8  | 93023204  | 93023344  | RUNX1T1 | 693_selected_genes |
| chr8  | 93026781  | 93027073  | RUNX1T1 | 693_selected_genes |
| chr8  | 93029428  | 93029684  | RUNX1T1 | 693_selected_genes |
| chr8  | 93074748  | 93074962  | RUNX1T1 | 693_selected_genes |
| chr8  | 93088167  | 93088305  | RUNX1T1 | 693_selected_genes |
| chr8  | 93107230  | 93107424  | RUNX1T1 | 693_selected_genes |
| chr8  | 93107549  | 93107720  | RUNX1T1 | 693_selected_genes |
| chr8  | 93115059  | 93115137  | RUNX1T1 | 693_selected_genes |
| chr1  | 25228587  | 25229182  | RUNX3   | 693_selected_genes |
| chr1  | 25233724  | 25233933  | RUNX3   | 693_selected_genes |
| chr1  | 25245705  | 25245860  | RUNX3   | 693_selected_genes |
| chr1  | 25254039  | 25254246  | RUNX3   | 693_selected_genes |
| chr1  | 25255505  | 25255558  | RUNX3   | 693_selected_genes |
| chr1  | 25256052  | 25256384  | RUNX3   | 693_selected_genes |
| chr1  | 25290979  | 25291087  | RUNX3   | 693_selected_genes |
| chr9  | 137218452 | 137218530 | RXRA    | 693_selected_genes |
| chr9  | 137293452 | 137293753 | RXRA    | 693_selected_genes |
| chr9  | 137299969 | 137300170 | RXRA    | 693_selected_genes |
| chr9  | 137300760 | 137300990 | RXRA    | 693_selected_genes |
| chr9  | 137308978 | 137309198 | RXRA    | 693_selected_genes |
| chr9  | 137313496 | 137313676 | RXRA    | 693_selected_genes |
| chr9  | 137320928 | 137321111 | RXRA    | 693_selected_genes |
| chr9  | 137323725 | 137323867 | RXRA    | 693_selected_genes |
| chr9  | 137325922 | 137326078 | RXRA    | 693_selected_genes |
| chr9  | 137328287 | 137328485 | RXRA    | 693_selected_genes |
| chr3  | 72427510  | 72427813  | RYBP    | 693_selected_genes |
| chr3  | 72428165  | 72428314  | RYBP    | 693_selected_genes |
| chr3  | 72428376  | 72428603  | RYBP    | 693_selected_genes |
| chr3  | 72495621  | 72496094  | RYBP    | 693_selected_genes |
| chr19 | 38924444  | 38924539  | RYR1    | 693_selected_genes |
| chr19 | 38931359  | 38931529  | RYR1    | 693_selected_genes |
| chr19 | 38932963  | 38933118  | RYR1    | 693_selected_genes |
| chr19 | 38934172  | 38934297  | RYR1    | 693_selected_genes |
| chr19 | 38934332  | 38934461  | RYR1    | 693_selected_genes |
| chr19 | 38934763  | 38934926  | RYR1    | 693_selected_genes |
| chr19 | 38935198  | 38935342  | RYR1    | 693_selected_genes |
| chr19 | 38937086  | 38937230  | RYR1    | 693_selected_genes |
| chr19 | 38937308  | 38937433  | RYR1    | 693_selected_genes |
| chr19 | 38938969  | 38939176  | RYR1    | 693_selected_genes |
| chr19 | 38939263  | 38939478  | RYR1    | 693_selected_genes |
| chr19 | 38942378  | 38942550  | RYR1    | 693_selected_genes |
| chr19 | 38943433  | 38943679  | RYR1    | 693_selected_genes |
| chr19 | 38945849  | 38946035  | RYR1    | 693_selected_genes |
| chr19 | 38946065  | 38946211  | RYR1    | 693_selected_genes |
| chr19 | 38946247  | 38946416  | RYR1    | 693_selected_genes |
| chr19 | 38948111  | 38948295  | RYR1    | 693_selected_genes |
| chr19 | 38948665  | 38948957  | RYR1    | 693_selected_genes |
| chr19 | 38949760  | 38950003  | RYR1    | 693_selected_genes |
| chr19 | 38950989  | 38951256  | RYR1    | 693_selected_genes |
| chr19 | 38954037  | 38954192  | RYR1    | 693_selected_genes |
| chr19 | 38954361  | 38954515  | RYR1    | 693_selected_genes |
| chr19 | 38955253  | 38955387  | RYR1    | 693_selected_genes |
| chr19 | 38956705  | 38957063  | RYR1    | 693_selected_genes |
| chr19 | 38958224  | 38958477  | RYR1    | 693_selected_genes |
| chr19 | 38959580  | 38959805  | RYR1    | 693_selected_genes |
| chr19 | 38959919  | 38960178  | RYR1    | 693_selected_genes |
| chr19 | 38963991  | 38964436  | RYR1    | 693_selected_genes |
| chr19 | 38965932  | 38966115  | RYR1    | 693_selected_genes |
| chr19 | 38968324  | 38968535  | RYR1    | 693_selected_genes |
| chr19 | 38969049  | 38969265  | RYR1    | 693_selected_genes |
| chr19 | 38973641  | 38973778  | RYR1    | 693_selected_genes |
| chr19 | 38973904  | 38974181  | RYR1    | 693_selected_genes |
| chr19 | 38976204  | 38976867  | RYR1    | 693_selected_genes |
| chr19 | 38979791  | 38980108  | RYR1    | 693_selected_genes |
| chr19 | 38980690  | 38980941  | RYR1    | 693_selected_genes |
| chr19 | 38981235  | 38981397  | RYR1    | 693_selected_genes |
| chr19 | 38983104  | 38983301  | RYR1    | 693_selected_genes |
| chr19 | 38984966  | 38985290  | RYR1    | 693_selected_genes |
| chr19 | 38986829  | 38986994  | RYR1    | 693_selected_genes |
| chr19 | 38987023  | 38987206  | RYR1    | 693_selected_genes |
| chr19 | 38987474  | 38987619  | RYR1    | 693_selected_genes |
| chr19 | 38989722  | 38989908  | RYR1    | 693_selected_genes |
| chr19 | 38990249  | 38990486  | RYR1    | 693_selected_genes |
| chr19 | 38990522  | 38990681  | RYR1    | 693_selected_genes |
| chr19 | 38991220  | 38991391  | RYR1    | 693_selected_genes |
| chr19 | 38991435  | 38991655  | RYR1    | 693_selected_genes |

|       |          |          |        |                    |
|-------|----------|----------|--------|--------------------|
| chr19 | 38993121 | 38993392 | RYR1   | 693_selected_genes |
| chr19 | 38993494 | 38993635 | RYR1   | 693_selected_genes |
| chr19 | 38994834 | 38995025 | RYR1   | 693_selected_genes |
| chr19 | 38995362 | 38995576 | RYR1   | 693_selected_genes |
| chr19 | 38995617 | 38995746 | RYR1   | 693_selected_genes |
| chr19 | 38995923 | 38996063 | RYR1   | 693_selected_genes |
| chr19 | 38996420 | 38996611 | RYR1   | 693_selected_genes |
| chr19 | 38996917 | 38997042 | RYR1   | 693_selected_genes |
| chr19 | 38997085 | 38997211 | RYR1   | 693_selected_genes |
| chr19 | 38997443 | 38997617 | RYR1   | 693_selected_genes |
| chr19 | 38998326 | 38998492 | RYR1   | 693_selected_genes |
| chr19 | 39001112 | 39001230 | RYR1   | 693_selected_genes |
| chr19 | 39001274 | 39001446 | RYR1   | 693_selected_genes |
| chr19 | 39002175 | 39002275 | RYR1   | 693_selected_genes |
| chr19 | 39002686 | 39002797 | RYR1   | 693_selected_genes |
| chr19 | 39002859 | 39003148 | RYR1   | 693_selected_genes |
| chr19 | 39005640 | 39005772 | RYR1   | 693_selected_genes |
| chr19 | 39006701 | 39006882 | RYR1   | 693_selected_genes |
| chr19 | 39007973 | 39008356 | RYR1   | 693_selected_genes |
| chr19 | 39009828 | 39010119 | RYR1   | 693_selected_genes |
| chr19 | 39013642 | 39013780 | RYR1   | 693_selected_genes |
| chr19 | 39013831 | 39013974 | RYR1   | 693_selected_genes |
| chr19 | 39014529 | 39014594 | RYR1   | 693_selected_genes |
| chr19 | 39015946 | 39016167 | RYR1   | 693_selected_genes |
| chr19 | 39017607 | 39017717 | RYR1   | 693_selected_genes |
| chr19 | 39018261 | 39018449 | RYR1   | 693_selected_genes |
| chr19 | 39018704 | 39018859 | RYR1   | 693_selected_genes |
| chr19 | 39018920 | 39019083 | RYR1   | 693_selected_genes |
| chr19 | 39019213 | 39019360 | RYR1   | 693_selected_genes |
| chr19 | 39019565 | 39019722 | RYR1   | 693_selected_genes |
| chr19 | 39023104 | 39023206 | RYR1   | 693_selected_genes |
| chr19 | 39023285 | 39023401 | RYR1   | 693_selected_genes |
| chr19 | 39025334 | 39025484 | RYR1   | 693_selected_genes |
| chr19 | 39025755 | 39025885 | RYR1   | 693_selected_genes |
| chr19 | 39025930 | 39026057 | RYR1   | 693_selected_genes |
| chr19 | 39026611 | 39026735 | RYR1   | 693_selected_genes |
| chr19 | 39027364 | 39027432 | RYR1   | 693_selected_genes |
| chr19 | 39028491 | 39028625 | RYR1   | 693_selected_genes |
| chr19 | 39029173 | 39029338 | RYR1   | 693_selected_genes |
| chr19 | 39033961 | 39034100 | RYR1   | 693_selected_genes |
| chr19 | 39034146 | 39034325 | RYR1   | 693_selected_genes |
| chr19 | 39034385 | 39034540 | RYR1   | 693_selected_genes |
| chr19 | 39037059 | 39037191 | RYR1   | 693_selected_genes |
| chr19 | 39038847 | 39039085 | RYR1   | 693_selected_genes |
| chr19 | 39051727 | 39052119 | RYR1   | 693_selected_genes |
| chr19 | 39055573 | 39056436 | RYR1   | 693_selected_genes |
| chr19 | 39057525 | 39057652 | RYR1   | 693_selected_genes |
| chr19 | 39058387 | 39058582 | RYR1   | 693_selected_genes |
| chr19 | 39061221 | 39061358 | RYR1   | 693_selected_genes |
| chr19 | 39062633 | 39062935 | RYR1   | 693_selected_genes |
| chr19 | 39063791 | 39063972 | RYR1   | 693_selected_genes |
| chr19 | 39066533 | 39066626 | RYR1   | 693_selected_genes |
| chr19 | 39068532 | 39068713 | RYR1   | 693_selected_genes |
| chr19 | 39068758 | 39068869 | RYR1   | 693_selected_genes |
| chr19 | 39070596 | 39070793 | RYR1   | 693_selected_genes |
| chr19 | 39070984 | 39071169 | RYR1   | 693_selected_genes |
| chr19 | 39075557 | 39075764 | RYR1   | 693_selected_genes |
| chr19 | 39076552 | 39076667 | RYR1   | 693_selected_genes |
| chr19 | 39076705 | 39076856 | RYR1   | 693_selected_genes |
| chr19 | 39077139 | 39077241 | RYR1   | 693_selected_genes |
| chr19 | 39077939 | 39078085 | RYR1   | 693_selected_genes |
| chr13 | 23903530 | 23903648 | SACS   | 693_selected_genes |
| chr13 | 23904249 | 23915854 | SACS   | 693_selected_genes |
| chr13 | 23927898 | 23928040 | SACS   | 693_selected_genes |
| chr13 | 23928632 | 23930171 | SACS   | 693_selected_genes |
| chr13 | 23932448 | 23932645 | SACS   | 693_selected_genes |
| chr13 | 23939279 | 23939441 | SACS   | 693_selected_genes |
| chr13 | 23942515 | 23942651 | SACS   | 693_selected_genes |
| chr13 | 23945191 | 23945329 | SACS   | 693_selected_genes |
| chr13 | 23949232 | 23949433 | SACS   | 693_selected_genes |
| chr13 | 23985333 | 23985403 | SACS   | 693_selected_genes |
| chr14 | 51100845 | 51100917 | SAV1   | 693_selected_genes |
| chr14 | 51101875 | 51102127 | SAV1   | 693_selected_genes |
| chr14 | 51107442 | 51107636 | SAV1   | 693_selected_genes |
| chr14 | 51111436 | 51111757 | SAV1   | 693_selected_genes |
| chr14 | 51131871 | 51132362 | SAV1   | 693_selected_genes |
| chr14 | 51134074 | 51134243 | SAV1   | 693_selected_genes |
| chr14 | 51134566 | 51134710 | SAV1   | 693_selected_genes |
| chr7  | 66453332 | 66453511 | SBDS   | 693_selected_genes |
| chr7  | 66456098 | 66456313 | SBDS   | 693_selected_genes |
| chr7  | 66458178 | 66458429 | SBDS   | 693_selected_genes |
| chr7  | 66459173 | 66459353 | SBDS   | 693_selected_genes |
| chr7  | 66460247 | 66460429 | SBDS   | 693_selected_genes |
| chr3  | 38888159 | 38889258 | SCN11A | 693_selected_genes |

|       |           |           |        |                    |
|-------|-----------|-----------|--------|--------------------|
| chr3  | 38891938  | 38892267  | SCN11A | 693_selected_genes |
| chr3  | 38904660  | 38904815  | SCN11A | 693_selected_genes |
| chr3  | 38908786  | 38908974  | SCN11A | 693_selected_genes |
| chr3  | 38912156  | 38912260  | SCN11A | 693_selected_genes |
| chr3  | 38912910  | 38913224  | SCN11A | 693_selected_genes |
| chr3  | 38913658  | 38913810  | SCN11A | 693_selected_genes |
| chr3  | 38921415  | 38921639  | SCN11A | 693_selected_genes |
| chr3  | 38924698  | 38924903  | SCN11A | 693_selected_genes |
| chr3  | 38926753  | 38926918  | SCN11A | 693_selected_genes |
| chr3  | 38927590  | 38927754  | SCN11A | 693_selected_genes |
| chr3  | 38935998  | 38936480  | SCN11A | 693_selected_genes |
| chr3  | 38938310  | 38938741  | SCN11A | 693_selected_genes |
| chr3  | 38941359  | 38941589  | SCN11A | 693_selected_genes |
| chr3  | 38945330  | 38945619  | SCN11A | 693_selected_genes |
| chr3  | 38946657  | 38946837  | SCN11A | 693_selected_genes |
| chr3  | 38949414  | 38949638  | SCN11A | 693_selected_genes |
| chr3  | 38950462  | 38950710  | SCN11A | 693_selected_genes |
| chr3  | 38951531  | 38951723  | SCN11A | 693_selected_genes |
| chr3  | 38961400  | 38961517  | SCN11A | 693_selected_genes |
| chr3  | 38962541  | 38962771  | SCN11A | 693_selected_genes |
| chr3  | 38966880  | 38967025  | SCN11A | 693_selected_genes |
| chr3  | 38968268  | 38968447  | SCN11A | 693_selected_genes |
| chr3  | 38986876  | 38987028  | SCN11A | 693_selected_genes |
| chr3  | 38988252  | 38988423  | SCN11A | 693_selected_genes |
| chr3  | 38991561  | 38991878  | SCN11A | 693_selected_genes |
| chr3  | 38591786  | 38593074  | SCN5A  | 693_selected_genes |
| chr3  | 38595744  | 38596065  | SCN5A  | 693_selected_genes |
| chr3  | 38597121  | 38597276  | SCN5A  | 693_selected_genes |
| chr3  | 38597906  | 38598094  | SCN5A  | 693_selected_genes |
| chr3  | 38598696  | 38598800  | SCN5A  | 693_selected_genes |
| chr3  | 38601612  | 38601944  | SCN5A  | 693_selected_genes |
| chr3  | 38603880  | 38604053  | SCN5A  | 693_selected_genes |
| chr3  | 38607874  | 38608098  | SCN5A  | 693_selected_genes |
| chr3  | 38616762  | 38616967  | SCN5A  | 693_selected_genes |
| chr3  | 38618126  | 38618297  | SCN5A  | 693_selected_genes |
| chr3  | 38620799  | 38621011  | SCN5A  | 693_selected_genes |
| chr3  | 38622396  | 38622887  | SCN5A  | 693_selected_genes |
| chr3  | 38627156  | 38627557  | SCN5A  | 693_selected_genes |
| chr3  | 38628865  | 38629089  | SCN5A  | 693_selected_genes |
| chr3  | 38639194  | 38639483  | SCN5A  | 693_selected_genes |
| chr3  | 38640383  | 38640566  | SCN5A  | 693_selected_genes |
| chr3  | 38645177  | 38645599  | SCN5A  | 693_selected_genes |
| chr3  | 38646194  | 38646424  | SCN5A  | 693_selected_genes |
| chr3  | 38647416  | 38647664  | SCN5A  | 693_selected_genes |
| chr3  | 38648134  | 38648326  | SCN5A  | 693_selected_genes |
| chr3  | 38649616  | 38649730  | SCN5A  | 693_selected_genes |
| chr3  | 38651199  | 38651480  | SCN5A  | 693_selected_genes |
| chr3  | 38655208  | 38655350  | SCN5A  | 693_selected_genes |
| chr3  | 38655440  | 38655582  | SCN5A  | 693_selected_genes |
| chr3  | 38662308  | 38662487  | SCN5A  | 693_selected_genes |
| chr3  | 38663865  | 38664005  | SCN5A  | 693_selected_genes |
| chr3  | 38671776  | 38671945  | SCN5A  | 693_selected_genes |
| chr3  | 38674500  | 38674823  | SCN5A  | 693_selected_genes |
| chr5  | 218445    | 218558    | SDHA   | 693_selected_genes |
| chr5  | 220329    | 220477    | SDHA   | 693_selected_genes |
| chr5  | 223571    | 223708    | SDHA   | 693_selected_genes |
| chr5  | 224449    | 224661    | SDHA   | 693_selected_genes |
| chr5  | 225508    | 225702    | SDHA   | 693_selected_genes |
| chr5  | 225972    | 226187    | SDHA   | 693_selected_genes |
| chr5  | 228274    | 228473    | SDHA   | 693_selected_genes |
| chr5  | 230965    | 231140    | SDHA   | 693_selected_genes |
| chr5  | 233566    | 233785    | SDHA   | 693_selected_genes |
| chr5  | 235233    | 235479    | SDHA   | 693_selected_genes |
| chr5  | 236517    | 236739    | SDHA   | 693_selected_genes |
| chr5  | 240447    | 240616    | SDHA   | 693_selected_genes |
| chr5  | 251081    | 251243    | SDHA   | 693_selected_genes |
| chr5  | 251426    | 251608    | SDHA   | 693_selected_genes |
| chr5  | 254447    | 254646    | SDHA   | 693_selected_genes |
| chr5  | 256423    | 256560    | SDHA   | 693_selected_genes |
| chr11 | 61197593  | 61197679  | SDHAF2 | 693_selected_genes |
| chr11 | 61204207  | 61204419  | SDHAF2 | 693_selected_genes |
| chr11 | 61205071  | 61205345  | SDHAF2 | 693_selected_genes |
| chr11 | 61205450  | 61205666  | SDHAF2 | 693_selected_genes |
| chr11 | 61205691  | 61205823  | SDHAF2 | 693_selected_genes |
| chr11 | 61213387  | 61213568  | SDHAF2 | 693_selected_genes |
| chr1  | 17345350  | 17345478  | SDHB   | 693_selected_genes |
| chr1  | 17349077  | 17349250  | SDHB   | 693_selected_genes |
| chr1  | 17350442  | 17350594  | SDHB   | 693_selected_genes |
| chr1  | 17354218  | 17354385  | SDHB   | 693_selected_genes |
| chr1  | 17355069  | 17355256  | SDHB   | 693_selected_genes |
| chr1  | 17359529  | 17359665  | SDHB   | 693_selected_genes |
| chr1  | 17371230  | 17371408  | SDHB   | 693_selected_genes |
| chr1  | 17380417  | 17380539  | SDHB   | 693_selected_genes |
| chr1  | 161284170 | 161284240 | SDHC   | 693_selected_genes |

|       |           |           |        |                    |
|-------|-----------|-----------|--------|--------------------|
| chr1  | 161293378 | 161293485 | SDHC   | 693_selected_genes |
| chr1  | 161298160 | 161298312 | SDHC   | 693_selected_genes |
| chr1  | 161309326 | 161309401 | SDHC   | 693_selected_genes |
| chr1  | 161310358 | 161310470 | SDHC   | 693_selected_genes |
| chr1  | 161326441 | 161326655 | SDHC   | 693_selected_genes |
| chr1  | 161332093 | 161332355 | SDHC   | 693_selected_genes |
| chr11 | 111957606 | 111957708 | SDHD   | 693_selected_genes |
| chr11 | 111958555 | 111958722 | SDHD   | 693_selected_genes |
| chr11 | 111959565 | 111959760 | SDHD   | 693_selected_genes |
| chr11 | 111961777 | 111961828 | SDHD   | 693_selected_genes |
| chr11 | 111963778 | 111963946 | SDHD   | 693_selected_genes |
| chr11 | 111965503 | 111965719 | SDHD   | 693_selected_genes |
| chr11 | 111978243 | 111978315 | SDHD   | 693_selected_genes |
| chr11 | 111989989 | 111990040 | SDHD   | 693_selected_genes |
| chr11 | 112041116 | 112041275 | SDHD   | 693_selected_genes |
| chr18 | 42281286  | 42281822  | SETBP1 | 693_selected_genes |
| chr18 | 42449169  | 42449273  | SETBP1 | 693_selected_genes |
| chr18 | 42456504  | 42456743  | SETBP1 | 693_selected_genes |
| chr18 | 42529820  | 42533330  | SETBP1 | 693_selected_genes |
| chr18 | 42618424  | 42618645  | SETBP1 | 693_selected_genes |
| chr18 | 42643018  | 42643688  | SETBP1 | 693_selected_genes |
| chr3  | 47058557  | 47058769  | SETD2  | 693_selected_genes |
| chr3  | 47059102  | 47059254  | SETD2  | 693_selected_genes |
| chr3  | 47061224  | 47061355  | SETD2  | 693_selected_genes |
| chr3  | 47079130  | 47079292  | SETD2  | 693_selected_genes |
| chr3  | 47084025  | 47084215  | SETD2  | 693_selected_genes |
| chr3  | 47087951  | 47088136  | SETD2  | 693_selected_genes |
| chr3  | 47098285  | 47099005  | SETD2  | 693_selected_genes |
| chr3  | 47103627  | 47103861  | SETD2  | 693_selected_genes |
| chr3  | 47106078  | 47106145  | SETD2  | 693_selected_genes |
| chr3  | 47108534  | 47108633  | SETD2  | 693_selected_genes |
| chr3  | 47125184  | 47125897  | SETD2  | 693_selected_genes |
| chr3  | 47127659  | 47127829  | SETD2  | 693_selected_genes |
| chr3  | 47129577  | 47129762  | SETD2  | 693_selected_genes |
| chr3  | 47139419  | 47139596  | SETD2  | 693_selected_genes |
| chr3  | 47142922  | 47143070  | SETD2  | 693_selected_genes |
| chr3  | 47144810  | 47144938  | SETD2  | 693_selected_genes |
| chr3  | 47147461  | 47147635  | SETD2  | 693_selected_genes |
| chr3  | 47155340  | 47155519  | SETD2  | 693_selected_genes |
| chr3  | 47158087  | 47158269  | SETD2  | 693_selected_genes |
| chr3  | 47161217  | 47161295  | SETD2  | 693_selected_genes |
| chr3  | 47161646  | 47166063  | SETD2  | 693_selected_genes |
| chr3  | 47168112  | 47168178  | SETD2  | 693_selected_genes |
| chr3  | 47205318  | 47205439  | SETD2  | 693_selected_genes |
| chr1  | 150899228 | 150899309 | SETDB1 | 693_selected_genes |
| chr1  | 150900154 | 150900475 | SETDB1 | 693_selected_genes |
| chr1  | 150902417 | 150902619 | SETDB1 | 693_selected_genes |
| chr1  | 150912390 | 150912475 | SETDB1 | 693_selected_genes |
| chr1  | 150913779 | 150913929 | SETDB1 | 693_selected_genes |
| chr1  | 150915013 | 150915189 | SETDB1 | 693_selected_genes |
| chr1  | 150915302 | 150915554 | SETDB1 | 693_selected_genes |
| chr1  | 150916370 | 150916494 | SETDB1 | 693_selected_genes |
| chr1  | 150917368 | 150917663 | SETDB1 | 693_selected_genes |
| chr1  | 150919336 | 150919513 | SETDB1 | 693_selected_genes |
| chr1  | 150921572 | 150921779 | SETDB1 | 693_selected_genes |
| chr1  | 150921817 | 150922026 | SETDB1 | 693_selected_genes |
| chr1  | 150922908 | 150923591 | SETDB1 | 693_selected_genes |
| chr1  | 150923815 | 150923982 | SETDB1 | 693_selected_genes |
| chr1  | 150931628 | 150931848 | SETDB1 | 693_selected_genes |
| chr1  | 150933013 | 150933692 | SETDB1 | 693_selected_genes |
| chr1  | 150934580 | 150934659 | SETDB1 | 693_selected_genes |
| chr1  | 150935037 | 150935220 | SETDB1 | 693_selected_genes |
| chr1  | 150935424 | 150935640 | SETDB1 | 693_selected_genes |
| chr1  | 150935980 | 150936352 | SETDB1 | 693_selected_genes |
| chr1  | 150936445 | 150936584 | SETDB1 | 693_selected_genes |
| chr1  | 150936697 | 150936865 | SETDB1 | 693_selected_genes |
| chr2  | 198257001 | 198257210 | SF3B1  | 693_selected_genes |
| chr2  | 198257670 | 198257937 | SF3B1  | 693_selected_genes |
| chr2  | 198260754 | 198261077 | SF3B1  | 693_selected_genes |
| chr2  | 198262683 | 198262865 | SF3B1  | 693_selected_genes |
| chr2  | 198263159 | 198263330 | SF3B1  | 693_selected_genes |
| chr2  | 198263667 | 198263777 | SF3B1  | 693_selected_genes |
| chr2  | 198264753 | 198264915 | SF3B1  | 693_selected_genes |
| chr2  | 198264950 | 198265183 | SF3B1  | 693_selected_genes |
| chr2  | 198265413 | 198265685 | SF3B1  | 693_selected_genes |
| chr2  | 198266098 | 198266274 | SF3B1  | 693_selected_genes |
| chr2  | 198266440 | 198266637 | SF3B1  | 693_selected_genes |
| chr2  | 198266683 | 198266879 | SF3B1  | 693_selected_genes |
| chr2  | 198267254 | 198267575 | SF3B1  | 693_selected_genes |
| chr2  | 198267647 | 198267784 | SF3B1  | 693_selected_genes |
| chr2  | 198268283 | 198268513 | SF3B1  | 693_selected_genes |
| chr2  | 198269774 | 198269926 | SF3B1  | 693_selected_genes |
| chr2  | 198269973 | 198270221 | SF3B1  | 693_selected_genes |
| chr2  | 198272696 | 198272868 | SF3B1  | 693_selected_genes |

|       |           |           |         |                    |
|-------|-----------|-----------|---------|--------------------|
| chr2  | 198273067 | 198273330 | SF3B1   | 693_selected_genes |
| chr2  | 198274468 | 198274756 | SF3B1   | 693_selected_genes |
| chr2  | 198281439 | 198281660 | SF3B1   | 693_selected_genes |
| chr2  | 198283207 | 198283337 | SF3B1   | 693_selected_genes |
| chr2  | 198283630 | 198283700 | SF3B1   | 693_selected_genes |
| chr2  | 198285076 | 198285291 | SF3B1   | 693_selected_genes |
| chr2  | 198285727 | 198285882 | SF3B1   | 693_selected_genes |
| chr2  | 198288506 | 198288723 | SF3B1   | 693_selected_genes |
| chr2  | 198299670 | 198299748 | SF3B1   | 693_selected_genes |
| chr6  | 134491380 | 134491598 | SGK1    | 693_selected_genes |
| chr6  | 134491938 | 134492078 | SGK1    | 693_selected_genes |
| chr6  | 134492135 | 134492341 | SGK1    | 693_selected_genes |
| chr6  | 134492749 | 134492895 | SGK1    | 693_selected_genes |
| chr6  | 134493305 | 134493479 | SGK1    | 693_selected_genes |
| chr6  | 134493774 | 134493937 | SGK1    | 693_selected_genes |
| chr6  | 134494135 | 134494317 | SGK1    | 693_selected_genes |
| chr6  | 134494386 | 134494520 | SGK1    | 693_selected_genes |
| chr6  | 134494574 | 134494729 | SGK1    | 693_selected_genes |
| chr6  | 134495117 | 134495243 | SGK1    | 693_selected_genes |
| chr6  | 134495623 | 134495795 | SGK1    | 693_selected_genes |
| chr6  | 134495844 | 134495970 | SGK1    | 693_selected_genes |
| chr6  | 134496656 | 134496824 | SGK1    | 693_selected_genes |
| chr6  | 134498775 | 134498985 | SGK1    | 693_selected_genes |
| chr6  | 134528468 | 134528594 | SGK1    | 693_selected_genes |
| chr6  | 134536167 | 134536256 | SGK1    | 693_selected_genes |
| chr6  | 134582868 | 134583311 | SGK1    | 693_selected_genes |
| chr6  | 134638504 | 134638623 | SGK1    | 693_selected_genes |
| chr12 | 111855924 | 111856706 | SH2B3   | 693_selected_genes |
| chr12 | 111872680 | 111872856 | SH2B3   | 693_selected_genes |
| chr12 | 111882517 | 111882677 | SH2B3   | 693_selected_genes |
| chr12 | 111884531 | 111884683 | SH2B3   | 693_selected_genes |
| chr12 | 111884720 | 111884862 | SH2B3   | 693_selected_genes |
| chr12 | 111884903 | 111885048 | SH2B3   | 693_selected_genes |
| chr12 | 111885108 | 111885373 | SH2B3   | 693_selected_genes |
| chr12 | 111885434 | 111885656 | SH2B3   | 693_selected_genes |
| chr12 | 111885761 | 111886131 | SH2B3   | 693_selected_genes |
| chrX  | 123480467 | 123480654 | SH2D1A  | 693_selected_genes |
| chrX  | 123499585 | 123499699 | SH2D1A  | 693_selected_genes |
| chrX  | 123504000 | 123504195 | SH2D1A  | 693_selected_genes |
| chrX  | 123505175 | 123505266 | SH2D1A  | 693_selected_genes |
| chr3  | 72799409  | 72800012  | SHQ1    | 693_selected_genes |
| chr3  | 72842041  | 72842212  | SHQ1    | 693_selected_genes |
| chr3  | 72861796  | 72861970  | SHQ1    | 693_selected_genes |
| chr3  | 72864475  | 72864579  | SHQ1    | 693_selected_genes |
| chr3  | 72866355  | 72866560  | SHQ1    | 693_selected_genes |
| chr3  | 72873549  | 72873727  | SHQ1    | 693_selected_genes |
| chr3  | 72881494  | 72881657  | SHQ1    | 693_selected_genes |
| chr3  | 72890170  | 72890375  | SHQ1    | 693_selected_genes |
| chr3  | 72891405  | 72891578  | SHQ1    | 693_selected_genes |
| chr3  | 72893484  | 72893629  | SHQ1    | 693_selected_genes |
| chr3  | 72895340  | 72895449  | SHQ1    | 693_selected_genes |
| chr3  | 72897323  | 72897516  | SHQ1    | 693_selected_genes |
| chr15 | 75664294  | 75664575  | SIN3A   | 693_selected_genes |
| chr15 | 75667980  | 75668238  | SIN3A   | 693_selected_genes |
| chr15 | 75672944  | 75673089  | SIN3A   | 693_selected_genes |
| chr15 | 75673928  | 75674071  | SIN3A   | 693_selected_genes |
| chr15 | 75676579  | 75676803  | SIN3A   | 693_selected_genes |
| chr15 | 75681967  | 75682187  | SIN3A   | 693_selected_genes |
| chr15 | 75684557  | 75685181  | SIN3A   | 693_selected_genes |
| chr15 | 75686995  | 75687229  | SIN3A   | 693_selected_genes |
| chr15 | 75688573  | 75688862  | SIN3A   | 693_selected_genes |
| chr15 | 75692355  | 75692522  | SIN3A   | 693_selected_genes |
| chr15 | 75693045  | 75693306  | SIN3A   | 693_selected_genes |
| chr15 | 75694167  | 75694336  | SIN3A   | 693_selected_genes |
| chr15 | 75699370  | 75699510  | SIN3A   | 693_selected_genes |
| chr15 | 75702151  | 75702357  | SIN3A   | 693_selected_genes |
| chr15 | 75702449  | 75702652  | SIN3A   | 693_selected_genes |
| chr15 | 75703807  | 75704109  | SIN3A   | 693_selected_genes |
| chr15 | 75705078  | 75705411  | SIN3A   | 693_selected_genes |
| chr15 | 75706520  | 75706677  | SIN3A   | 693_selected_genes |
| chr15 | 75714857  | 75715189  | SIN3A   | 693_selected_genes |
| chr15 | 75722502  | 75722741  | SIN3A   | 693_selected_genes |
| chr21 | 46916223  | 46916318  | SLC19A1 | 693_selected_genes |
| chr21 | 46918156  | 46918551  | SLC19A1 | 693_selected_genes |
| chr21 | 46934864  | 46935091  | SLC19A1 | 693_selected_genes |
| chr21 | 46935546  | 46936079  | SLC19A1 | 693_selected_genes |
| chr21 | 46945705  | 46945897  | SLC19A1 | 693_selected_genes |
| chr21 | 46950658  | 46950910  | SLC19A1 | 693_selected_genes |
| chr21 | 46951277  | 46952087  | SLC19A1 | 693_selected_genes |
| chr21 | 46954426  | 46954545  | SLC19A1 | 693_selected_genes |
| chr21 | 46957659  | 46957898  | SLC19A1 | 693_selected_genes |
| chr6  | 160638438 | 160638555 | SLC22A2 | 693_selected_genes |
| chr6  | 160645711 | 160645861 | SLC22A2 | 693_selected_genes |
| chr6  | 160662480 | 160662643 | SLC22A2 | 693_selected_genes |

|       |           |           |         |                    |
|-------|-----------|-----------|---------|--------------------|
| chr6  | 160663300 | 160663459 | SLC22A2 | 693_selected_genes |
| chr6  | 160664578 | 160664843 | SLC22A2 | 693_selected_genes |
| chr6  | 160666441 | 160666602 | SLC22A2 | 693_selected_genes |
| chr6  | 160668190 | 160668355 | SLC22A2 | 693_selected_genes |
| chr6  | 160670222 | 160670441 | SLC22A2 | 693_selected_genes |
| chr6  | 160671554 | 160671759 | SLC22A2 | 693_selected_genes |
| chr6  | 160677620 | 160677774 | SLC22A2 | 693_selected_genes |
| chr6  | 160679350 | 160679814 | SLC22A2 | 693_selected_genes |
| chr7  | 107406274 | 107406348 | SLC26A3 | 693_selected_genes |
| chr7  | 107407998 | 107408114 | SLC26A3 | 693_selected_genes |
| chr7  | 107408185 | 107408378 | SLC26A3 | 693_selected_genes |
| chr7  | 107412473 | 107412578 | SLC26A3 | 693_selected_genes |
| chr7  | 107414339 | 107414623 | SLC26A3 | 693_selected_genes |
| chr7  | 107415196 | 107415342 | SLC26A3 | 693_selected_genes |
| chr7  | 107416871 | 107417014 | SLC26A3 | 693_selected_genes |
| chr7  | 107417056 | 107417176 | SLC26A3 | 693_selected_genes |
| chr7  | 107418594 | 107418751 | SLC26A3 | 693_selected_genes |
| chr7  | 107420087 | 107420233 | SLC26A3 | 693_selected_genes |
| chr7  | 107423216 | 107423344 | SLC26A3 | 693_selected_genes |
| chr7  | 107423399 | 107423563 | SLC26A3 | 693_selected_genes |
| chr7  | 107423624 | 107423822 | SLC26A3 | 693_selected_genes |
| chr7  | 107427246 | 107427379 | SLC26A3 | 693_selected_genes |
| chr7  | 107427776 | 107427979 | SLC26A3 | 693_selected_genes |
| chr7  | 107429943 | 107430158 | SLC26A3 | 693_selected_genes |
| chr7  | 107431467 | 107431705 | SLC26A3 | 693_selected_genes |
| chr7  | 107432249 | 107432410 | SLC26A3 | 693_selected_genes |
| chr7  | 107434161 | 107434351 | SLC26A3 | 693_selected_genes |
| chr7  | 107434798 | 107434979 | SLC26A3 | 693_selected_genes |
| chr12 | 20968647  | 20968781  | SLCO1B3 | 693_selected_genes |
| chr12 | 21007936  | 21008128  | SLCO1B3 | 693_selected_genes |
| chr12 | 21011347  | 21011530  | SLCO1B3 | 693_selected_genes |
| chr12 | 21013925  | 21014097  | SLCO1B3 | 693_selected_genes |
| chr12 | 21015320  | 21015517  | SLCO1B3 | 693_selected_genes |
| chr12 | 21015664  | 21015813  | SLCO1B3 | 693_selected_genes |
| chr12 | 21028143  | 21028436  | SLCO1B3 | 693_selected_genes |
| chr12 | 21030680  | 21030895  | SLCO1B3 | 693_selected_genes |
| chr12 | 21032344  | 21032590  | SLCO1B3 | 693_selected_genes |
| chr12 | 21033763  | 21033979  | SLCO1B3 | 693_selected_genes |
| chr12 | 21036326  | 21036561  | SLCO1B3 | 693_selected_genes |
| chr12 | 21051344  | 21051459  | SLCO1B3 | 693_selected_genes |
| chr12 | 21054258  | 21054426  | SLCO1B3 | 693_selected_genes |
| chr12 | 21054808  | 21054961  | SLCO1B3 | 693_selected_genes |
| chr12 | 21068912  | 21069206  | SLCO1B3 | 693_selected_genes |
| chr12 | 21220227  | 21220342  | SLCO1B3 | 693_selected_genes |
| chr12 | 21229360  | 21229528  | SLCO1B3 | 693_selected_genes |
| chr12 | 21242816  | 21243065  | SLCO1B3 | 693_selected_genes |
| chr18 | 45368172  | 45368346  | SMAD2   | 693_selected_genes |
| chr18 | 45371579  | 45371880  | SMAD2   | 693_selected_genes |
| chr18 | 45372008  | 45372196  | SMAD2   | 693_selected_genes |
| chr18 | 45374820  | 45375083  | SMAD2   | 693_selected_genes |
| chr18 | 45377619  | 45377723  | SMAD2   | 693_selected_genes |
| chr18 | 45391404  | 45391529  | SMAD2   | 693_selected_genes |
| chr18 | 45394668  | 45394853  | SMAD2   | 693_selected_genes |
| chr18 | 45395588  | 45395832  | SMAD2   | 693_selected_genes |
| chr18 | 45396818  | 45396960  | SMAD2   | 693_selected_genes |
| chr18 | 45422866  | 45423152  | SMAD2   | 693_selected_genes |
| chr15 | 67358467  | 67358723  | SMAD3   | 693_selected_genes |
| chr15 | 67391186  | 67391387  | SMAD3   | 693_selected_genes |
| chr15 | 67430339  | 67430463  | SMAD3   | 693_selected_genes |
| chr15 | 67457207  | 67457451  | SMAD3   | 693_selected_genes |
| chr15 | 67457565  | 67457747  | SMAD3   | 693_selected_genes |
| chr15 | 67459091  | 67459216  | SMAD3   | 693_selected_genes |
| chr15 | 67462866  | 67462967  | SMAD3   | 693_selected_genes |
| chr15 | 67473553  | 67473816  | SMAD3   | 693_selected_genes |
| chr15 | 67477039  | 67477227  | SMAD3   | 693_selected_genes |
| chr15 | 67479332  | 67479493  | SMAD3   | 693_selected_genes |
| chr15 | 67479677  | 67479872  | SMAD3   | 693_selected_genes |
| chr15 | 67482725  | 67482899  | SMAD3   | 693_selected_genes |
| chr18 | 48573391  | 48573690  | SMAD4   | 693_selected_genes |
| chr18 | 48575030  | 48575255  | SMAD4   | 693_selected_genes |
| chr18 | 48575639  | 48575719  | SMAD4   | 693_selected_genes |
| chr18 | 48577698  | 48577810  | SMAD4   | 693_selected_genes |
| chr18 | 48578979  | 48579047  | SMAD4   | 693_selected_genes |
| chr18 | 48581125  | 48581388  | SMAD4   | 693_selected_genes |
| chr18 | 48584469  | 48584639  | SMAD4   | 693_selected_genes |
| chr18 | 48584684  | 48584851  | SMAD4   | 693_selected_genes |
| chr18 | 48586210  | 48586311  | SMAD4   | 693_selected_genes |
| chr18 | 48591767  | 48592001  | SMAD4   | 693_selected_genes |
| chr18 | 48593363  | 48593582  | SMAD4   | 693_selected_genes |
| chr18 | 48602982  | 48603206  | SMAD4   | 693_selected_genes |
| chr18 | 48604600  | 48604862  | SMAD4   | 693_selected_genes |
| chrX  | 128581113 | 128581235 | SMARCA1 | 693_selected_genes |
| chrX  | 128582260 | 128582445 | SMARCA1 | 693_selected_genes |
| chrX  | 128599471 | 128599734 | SMARCA1 | 693_selected_genes |

|       |           |           |         |                    |
|-------|-----------|-----------|---------|--------------------|
| chrX  | 128599795 | 128599964 | SMARCA1 | 693_selected_genes |
| chrX  | 128602724 | 128602907 | SMARCA1 | 693_selected_genes |
| chrX  | 128605155 | 128605328 | SMARCA1 | 693_selected_genes |
| chrX  | 128614652 | 128614816 | SMARCA1 | 693_selected_genes |
| chrX  | 128615026 | 128615187 | SMARCA1 | 693_selected_genes |
| chrX  | 128620969 | 128621139 | SMARCA1 | 693_selected_genes |
| chrX  | 128622888 | 128623087 | SMARCA1 | 693_selected_genes |
| chrX  | 128624011 | 128624194 | SMARCA1 | 693_selected_genes |
| chrX  | 128625892 | 128626095 | SMARCA1 | 693_selected_genes |
| chrX  | 128626991 | 128627077 | SMARCA1 | 693_selected_genes |
| chrX  | 128630701 | 128630873 | SMARCA1 | 693_selected_genes |
| chrX  | 128631796 | 128632073 | SMARCA1 | 693_selected_genes |
| chrX  | 128633683 | 128633843 | SMARCA1 | 693_selected_genes |
| chrX  | 128638685 | 128638804 | SMARCA1 | 693_selected_genes |
| chrX  | 128640031 | 128640213 | SMARCA1 | 693_selected_genes |
| chrX  | 128641892 | 128642098 | SMARCA1 | 693_selected_genes |
| chrX  | 128645755 | 128645985 | SMARCA1 | 693_selected_genes |
| chrX  | 128649638 | 128649789 | SMARCA1 | 693_selected_genes |
| chrX  | 128649845 | 128649996 | SMARCA1 | 693_selected_genes |
| chrX  | 128650282 | 128650499 | SMARCA1 | 693_selected_genes |
| chrX  | 128652312 | 128652449 | SMARCA1 | 693_selected_genes |
| chrX  | 128657148 | 128657372 | SMARCA1 | 693_selected_genes |
| chr19 | 11094802  | 11095074  | SMARCA4 | 693_selected_genes |
| chr19 | 11095923  | 11096106  | SMARCA4 | 693_selected_genes |
| chr19 | 11096839  | 11097294  | SMARCA4 | 693_selected_genes |
| chr19 | 11097555  | 11097704  | SMARCA4 | 693_selected_genes |
| chr19 | 11098316  | 11098625  | SMARCA4 | 693_selected_genes |
| chr19 | 11099967  | 11100144  | SMARCA4 | 693_selected_genes |
| chr19 | 11101800  | 11102024  | SMARCA4 | 693_selected_genes |
| chr19 | 11105478  | 11105702  | SMARCA4 | 693_selected_genes |
| chr19 | 11106863  | 11107081  | SMARCA4 | 693_selected_genes |
| chr19 | 11107144  | 11107245  | SMARCA4 | 693_selected_genes |
| chr19 | 11113679  | 11113860  | SMARCA4 | 693_selected_genes |
| chr19 | 11113990  | 11114098  | SMARCA4 | 693_selected_genes |
| chr19 | 11118552  | 11118724  | SMARCA4 | 693_selected_genes |
| chr19 | 11121031  | 11121232  | SMARCA4 | 693_selected_genes |
| chr19 | 11123599  | 11123813  | SMARCA4 | 693_selected_genes |
| chr19 | 11129607  | 11129724  | SMARCA4 | 693_selected_genes |
| chr19 | 11130241  | 11130402  | SMARCA4 | 693_selected_genes |
| chr19 | 11132375  | 11132668  | SMARCA4 | 693_selected_genes |
| chr19 | 11134168  | 11134332  | SMARCA4 | 693_selected_genes |
| chr19 | 11134981  | 11135139  | SMARCA4 | 693_selected_genes |
| chr19 | 11136072  | 11136209  | SMARCA4 | 693_selected_genes |
| chr19 | 11136950  | 11137047  | SMARCA4 | 693_selected_genes |
| chr19 | 11138434  | 11138651  | SMARCA4 | 693_selected_genes |
| chr19 | 11141380  | 11141594  | SMARCA4 | 693_selected_genes |
| chr19 | 11143940  | 11144218  | SMARCA4 | 693_selected_genes |
| chr19 | 11144417  | 11144566  | SMARCA4 | 693_selected_genes |
| chr19 | 11144773  | 11144901  | SMARCA4 | 693_selected_genes |
| chr19 | 11145564  | 11145833  | SMARCA4 | 693_selected_genes |
| chr19 | 11150108  | 11150254  | SMARCA4 | 693_selected_genes |
| chr19 | 11151948  | 11152261  | SMARCA4 | 693_selected_genes |
| chr19 | 11168905  | 11169064  | SMARCA4 | 693_selected_genes |
| chr19 | 11169438  | 11169590  | SMARCA4 | 693_selected_genes |
| chr19 | 11170403  | 11170586  | SMARCA4 | 693_selected_genes |
| chr19 | 11170695  | 11170888  | SMARCA4 | 693_selected_genes |
| chr19 | 11172434  | 11172517  | SMARCA4 | 693_selected_genes |
| chr19 | 11175843  | 11175902  | SMARCA4 | 693_selected_genes |
| chr22 | 24129331  | 24129474  | SMARCB1 | 693_selected_genes |
| chr22 | 24133917  | 24134106  | SMARCB1 | 693_selected_genes |
| chr22 | 24135720  | 24135900  | SMARCB1 | 693_selected_genes |
| chr22 | 24143105  | 24143347  | SMARCB1 | 693_selected_genes |
| chr22 | 24145456  | 24145634  | SMARCB1 | 693_selected_genes |
| chr22 | 24158931  | 24159148  | SMARCB1 | 693_selected_genes |
| chr22 | 24167386  | 24167627  | SMARCB1 | 693_selected_genes |
| chr22 | 24175733  | 24175915  | SMARCB1 | 693_selected_genes |
| chr22 | 24176302  | 24176392  | SMARCB1 | 693_selected_genes |
| chr12 | 50479127  | 50479354  | SMARCD1 | 693_selected_genes |
| chr12 | 50479918  | 50480156  | SMARCD1 | 693_selected_genes |
| chr12 | 50480378  | 50480471  | SMARCD1 | 693_selected_genes |
| chr12 | 50480513  | 50480686  | SMARCD1 | 693_selected_genes |
| chr12 | 50481120  | 50481293  | SMARCD1 | 693_selected_genes |
| chr12 | 50481996  | 50482098  | SMARCD1 | 693_selected_genes |
| chr12 | 50482278  | 50482445  | SMARCD1 | 693_selected_genes |
| chr12 | 50483641  | 50483793  | SMARCD1 | 693_selected_genes |
| chr12 | 50483998  | 50484210  | SMARCD1 | 693_selected_genes |
| chr12 | 50484250  | 50484398  | SMARCD1 | 693_selected_genes |
| chr12 | 50488194  | 50488380  | SMARCD1 | 693_selected_genes |
| chr12 | 50490607  | 50490780  | SMARCD1 | 693_selected_genes |
| chr12 | 50492471  | 50492623  | SMARCD1 | 693_selected_genes |
| chr12 | 50492704  | 50492808  | SMARCD1 | 693_selected_genes |
| chrX  | 53406998  | 53407132  | SMC1A   | 693_selected_genes |
| chrX  | 53407515  | 53407676  | SMC1A   | 693_selected_genes |
| chrX  | 53407913  | 53408033  | SMC1A   | 693_selected_genes |

|       |           |           |        |                    |
|-------|-----------|-----------|--------|--------------------|
| chrX  | 53409127  | 53409329  | SMC1A  | 693_selected_genes |
| chrX  | 53409401  | 53409606  | SMC1A  | 693_selected_genes |
| chrX  | 53409992  | 53410199  | SMC1A  | 693_selected_genes |
| chrX  | 53421672  | 53421833  | SMC1A  | 693_selected_genes |
| chrX  | 53423121  | 53423325  | SMC1A  | 693_selected_genes |
| chrX  | 53423366  | 53423562  | SMC1A  | 693_selected_genes |
| chrX  | 53426485  | 53426677  | SMC1A  | 693_selected_genes |
| chrX  | 53430472  | 53430629  | SMC1A  | 693_selected_genes |
| chrX  | 53430683  | 53430850  | SMC1A  | 693_selected_genes |
| chrX  | 53431861  | 53432106  | SMC1A  | 693_selected_genes |
| chrX  | 53432151  | 53432348  | SMC1A  | 693_selected_genes |
| chrX  | 53432399  | 53432629  | SMC1A  | 693_selected_genes |
| chrX  | 53432677  | 53432913  | SMC1A  | 693_selected_genes |
| chrX  | 53435967  | 53436225  | SMC1A  | 693_selected_genes |
| chrX  | 53436326  | 53436459  | SMC1A  | 693_selected_genes |
| chrX  | 53438685  | 53438876  | SMC1A  | 693_selected_genes |
| chrX  | 53438919  | 53439228  | SMC1A  | 693_selected_genes |
| chrX  | 53439824  | 53440113  | SMC1A  | 693_selected_genes |
| chrX  | 53440156  | 53440410  | SMC1A  | 693_selected_genes |
| chrX  | 53441681  | 53441844  | SMC1A  | 693_selected_genes |
| chrX  | 53441904  | 53442143  | SMC1A  | 693_selected_genes |
| chrX  | 53448819  | 53448992  | SMC1A  | 693_selected_genes |
| chrX  | 53449415  | 53449574  | SMC1A  | 693_selected_genes |
| chr10 | 112327549 | 112327614 | SMC3   | 693_selected_genes |
| chr10 | 112328670 | 112328796 | SMC3   | 693_selected_genes |
| chr10 | 112333439 | 112333528 | SMC3   | 693_selected_genes |
| chr10 | 112335068 | 112335186 | SMC3   | 693_selected_genes |
| chr10 | 112337153 | 112337275 | SMC3   | 693_selected_genes |
| chr10 | 112337567 | 112337697 | SMC3   | 693_selected_genes |
| chr10 | 112338360 | 112338489 | SMC3   | 693_selected_genes |
| chr10 | 112340636 | 112340804 | SMC3   | 693_selected_genes |
| chr10 | 112341655 | 112341881 | SMC3   | 693_selected_genes |
| chr10 | 112342294 | 112342425 | SMC3   | 693_selected_genes |
| chr10 | 112343116 | 112343331 | SMC3   | 693_selected_genes |
| chr10 | 112343573 | 112343745 | SMC3   | 693_selected_genes |
| chr10 | 112343915 | 112344179 | SMC3   | 693_selected_genes |
| chr10 | 112349337 | 112349491 | SMC3   | 693_selected_genes |
| chr10 | 112349624 | 112349774 | SMC3   | 693_selected_genes |
| chr10 | 112350144 | 112350355 | SMC3   | 693_selected_genes |
| chr10 | 112350723 | 112350915 | SMC3   | 693_selected_genes |
| chr10 | 112352805 | 112353006 | SMC3   | 693_selected_genes |
| chr10 | 112356130 | 112356333 | SMC3   | 693_selected_genes |
| chr10 | 112357871 | 112358073 | SMC3   | 693_selected_genes |
| chr10 | 112359386 | 112359595 | SMC3   | 693_selected_genes |
| chr10 | 112360171 | 112360329 | SMC3   | 693_selected_genes |
| chr10 | 112360754 | 112360913 | SMC3   | 693_selected_genes |
| chr10 | 112361369 | 112361667 | SMC3   | 693_selected_genes |
| chr10 | 112361698 | 112361961 | SMC3   | 693_selected_genes |
| chr10 | 112362206 | 112362448 | SMC3   | 693_selected_genes |
| chr10 | 112362557 | 112362785 | SMC3   | 693_selected_genes |
| chr10 | 112362916 | 112363073 | SMC3   | 693_selected_genes |
| chr10 | 112363963 | 112364085 | SMC3   | 693_selected_genes |
| chr7  | 128828967 | 128829348 | SMO    | 693_selected_genes |
| chr7  | 128843199 | 128843455 | SMO    | 693_selected_genes |
| chr7  | 128845018 | 128845278 | SMO    | 693_selected_genes |
| chr7  | 128845425 | 128845648 | SMO    | 693_selected_genes |
| chr7  | 128845965 | 128846235 | SMO    | 693_selected_genes |
| chr7  | 128846279 | 128846453 | SMO    | 693_selected_genes |
| chr7  | 128848574 | 128848717 | SMO    | 693_selected_genes |
| chr7  | 128849104 | 128849263 | SMO    | 693_selected_genes |
| chr7  | 128850178 | 128850414 | SMO    | 693_selected_genes |
| chr7  | 128850780 | 128850979 | SMO    | 693_selected_genes |
| chr7  | 128851198 | 128851271 | SMO    | 693_selected_genes |
| chr7  | 128851451 | 128851636 | SMO    | 693_selected_genes |
| chr7  | 128851839 | 128852317 | SMO    | 693_selected_genes |
| chr5  | 121726804 | 121726911 | SNCAIP | 693_selected_genes |
| chr5  | 121736655 | 121736850 | SNCAIP | 693_selected_genes |
| chr5  | 121739462 | 121739585 | SNCAIP | 693_selected_genes |
| chr5  | 121758537 | 121759459 | SNCAIP | 693_selected_genes |
| chr5  | 121761021 | 121761251 | SNCAIP | 693_selected_genes |
| chr5  | 121767638 | 121767802 | SNCAIP | 693_selected_genes |
| chr5  | 121776298 | 121776474 | SNCAIP | 693_selected_genes |
| chr5  | 121779240 | 121779405 | SNCAIP | 693_selected_genes |
| chr5  | 121779755 | 121779894 | SNCAIP | 693_selected_genes |
| chr5  | 121780232 | 121780452 | SNCAIP | 693_selected_genes |
| chr5  | 121785514 | 121785657 | SNCAIP | 693_selected_genes |
| chr5  | 121786202 | 121787324 | SNCAIP | 693_selected_genes |
| chr5  | 121788594 | 121788715 | SNCAIP | 693_selected_genes |
| chr5  | 121799160 | 121799295 | SNCAIP | 693_selected_genes |
| chr16 | 11348674  | 11349360  | SOCS1  | 693_selected_genes |
| chr6  | 160103499 | 160103695 | SOD2   | 693_selected_genes |
| chr6  | 160105860 | 160106090 | SOD2   | 693_selected_genes |
| chr6  | 160109132 | 160109299 | SOD2   | 693_selected_genes |
| chr6  | 160113470 | 160113920 | SOD2   | 693_selected_genes |

|       |           |           |       |                    |
|-------|-----------|-----------|-------|--------------------|
| chr6  | 160114151 | 160114287 | SOD2  | 693_selected_genes |
| chr6  | 160147858 | 160148000 | SOD2  | 693_selected_genes |
| chr6  | 160148272 | 160148414 | SOD2  | 693_selected_genes |
| chr2  | 39212939  | 39213481  | SOS1  | 693_selected_genes |
| chr2  | 39214588  | 39214757  | SOS1  | 693_selected_genes |
| chr2  | 39216385  | 39216480  | SOS1  | 693_selected_genes |
| chr2  | 39222238  | 39222553  | SOS1  | 693_selected_genes |
| chr2  | 39224037  | 39224204  | SOS1  | 693_selected_genes |
| chr2  | 39224368  | 39224591  | SOS1  | 693_selected_genes |
| chr2  | 39233527  | 39233695  | SOS1  | 693_selected_genes |
| chr2  | 39234146  | 39234359  | SOS1  | 693_selected_genes |
| chr2  | 39237699  | 39237869  | SOS1  | 693_selected_genes |
| chr2  | 39239241  | 39239514  | SOS1  | 693_selected_genes |
| chr2  | 39240575  | 39240729  | SOS1  | 693_selected_genes |
| chr2  | 39240982  | 39241155  | SOS1  | 693_selected_genes |
| chr2  | 39241880  | 39242012  | SOS1  | 693_selected_genes |
| chr2  | 39249685  | 39250391  | SOS1  | 693_selected_genes |
| chr2  | 39251125  | 39251303  | SOS1  | 693_selected_genes |
| chr2  | 39261932  | 39262024  | SOS1  | 693_selected_genes |
| chr2  | 39262327  | 39262476  | SOS1  | 693_selected_genes |
| chr2  | 39262505  | 39262666  | SOS1  | 693_selected_genes |
| chr2  | 39278259  | 39278453  | SOS1  | 693_selected_genes |
| chr2  | 39281729  | 39281989  | SOS1  | 693_selected_genes |
| chr2  | 39283817  | 39284032  | SOS1  | 693_selected_genes |
| chr2  | 39285788  | 39285970  | SOS1  | 693_selected_genes |
| chr2  | 39294743  | 39294919  | SOS1  | 693_selected_genes |
| chr2  | 39347451  | 39347588  | SOS1  | 693_selected_genes |
| chr22 | 38367223  | 38367330  | SOX10 | 693_selected_genes |
| chr22 | 38369476  | 38370230  | SOX10 | 693_selected_genes |
| chr22 | 38373848  | 38374167  | SOX10 | 693_selected_genes |
| chr22 | 38379338  | 38379816  | SOX10 | 693_selected_genes |
| chr8  | 55370673  | 55371030  | SOX17 | 693_selected_genes |
| chr8  | 55371592  | 55372580  | SOX17 | 693_selected_genes |
| chr3  | 181430123 | 181431127 | SOX2  | 693_selected_genes |
| chr17 | 70117507  | 70117988  | SOX9  | 693_selected_genes |
| chr17 | 70118834  | 70119138  | SOX9  | 693_selected_genes |
| chr17 | 70119658  | 70120553  | SOX9  | 693_selected_genes |
| chr1  | 16174537  | 16174670  | SPEN  | 693_selected_genes |
| chr1  | 16199285  | 16199656  | SPEN  | 693_selected_genes |
| chr1  | 16200584  | 16200915  | SPEN  | 693_selected_genes |
| chr1  | 16202671  | 16203198  | SPEN  | 693_selected_genes |
| chr1  | 16235790  | 16236001  | SPEN  | 693_selected_genes |
| chr1  | 16237570  | 16237821  | SPEN  | 693_selected_genes |
| chr1  | 16242597  | 16242799  | SPEN  | 693_selected_genes |
| chr1  | 16245395  | 16245571  | SPEN  | 693_selected_genes |
| chr1  | 16245873  | 16246037  | SPEN  | 693_selected_genes |
| chr1  | 16247339  | 16247503  | SPEN  | 693_selected_genes |
| chr1  | 16248718  | 16248869  | SPEN  | 693_selected_genes |
| chr1  | 16254560  | 16262786  | SPEN  | 693_selected_genes |
| chr1  | 16263632  | 16264165  | SPEN  | 693_selected_genes |
| chr1  | 16264281  | 16264526  | SPEN  | 693_selected_genes |
| chr1  | 16265187  | 16265396  | SPEN  | 693_selected_genes |
| chr1  | 16265765  | 16265947  | SPEN  | 693_selected_genes |
| chr17 | 47677714  | 47677909  | SPOP  | 693_selected_genes |
| chr17 | 47679201  | 47679394  | SPOP  | 693_selected_genes |
| chr17 | 47684586  | 47684759  | SPOP  | 693_selected_genes |
| chr17 | 47685210  | 47685316  | SPOP  | 693_selected_genes |
| chr17 | 47688616  | 47688844  | SPOP  | 693_selected_genes |
| chr17 | 47695882  | 47695950  | SPOP  | 693_selected_genes |
| chr17 | 47696317  | 47696495  | SPOP  | 693_selected_genes |
| chr17 | 47696570  | 47696772  | SPOP  | 693_selected_genes |
| chr17 | 47698006  | 47698057  | SPOP  | 693_selected_genes |
| chr17 | 47699282  | 47699454  | SPOP  | 693_selected_genes |
| chr17 | 47699563  | 47699670  | SPOP  | 693_selected_genes |
| chr17 | 47700069  | 47700197  | SPOP  | 693_selected_genes |
| chr1  | 158581028 | 158581204 | SPTA1 | 693_selected_genes |
| chr1  | 158582581 | 158582776 | SPTA1 | 693_selected_genes |
| chr1  | 158583485 | 158583682 | SPTA1 | 693_selected_genes |
| chr1  | 158584017 | 158584121 | SPTA1 | 693_selected_genes |
| chr1  | 158584980 | 158585218 | SPTA1 | 693_selected_genes |
| chr1  | 158587301 | 158587403 | SPTA1 | 693_selected_genes |
| chr1  | 158587803 | 158587871 | SPTA1 | 693_selected_genes |
| chr1  | 158588986 | 158589149 | SPTA1 | 693_selected_genes |
| chr1  | 158589934 | 158590281 | SPTA1 | 693_selected_genes |
| chr1  | 158592747 | 158593007 | SPTA1 | 693_selected_genes |
| chr1  | 158595910 | 158596037 | SPTA1 | 693_selected_genes |
| chr1  | 158596603 | 158596822 | SPTA1 | 693_selected_genes |
| chr1  | 158597389 | 158597538 | SPTA1 | 693_selected_genes |
| chr1  | 158604307 | 158604490 | SPTA1 | 693_selected_genes |
| chr1  | 158605677 | 158605849 | SPTA1 | 693_selected_genes |
| chr1  | 158606405 | 158606576 | SPTA1 | 693_selected_genes |
| chr1  | 158607797 | 158608056 | SPTA1 | 693_selected_genes |
| chr1  | 158609346 | 158609501 | SPTA1 | 693_selected_genes |
| chr1  | 158609634 | 158609822 | SPTA1 | 693_selected_genes |

|      |           |           |        |                    |
|------|-----------|-----------|--------|--------------------|
| chr1 | 158612175 | 158612357 | SPTA1  | 693_selected_genes |
| chr1 | 158612578 | 158612791 | SPTA1  | 693_selected_genes |
| chr1 | 158613086 | 158613240 | SPTA1  | 693_selected_genes |
| chr1 | 158614017 | 158614211 | SPTA1  | 693_selected_genes |
| chr1 | 158614952 | 158615200 | SPTA1  | 693_selected_genes |
| chr1 | 158615259 | 158615409 | SPTA1  | 693_selected_genes |
| chr1 | 158617303 | 158617535 | SPTA1  | 693_selected_genes |
| chr1 | 158618273 | 158618468 | SPTA1  | 693_selected_genes |
| chr1 | 158619620 | 158619762 | SPTA1  | 693_selected_genes |
| chr1 | 158621131 | 158621283 | SPTA1  | 693_selected_genes |
| chr1 | 158622231 | 158622468 | SPTA1  | 693_selected_genes |
| chr1 | 158623038 | 158623240 | SPTA1  | 693_selected_genes |
| chr1 | 158624375 | 158624563 | SPTA1  | 693_selected_genes |
| chr1 | 158626328 | 158626471 | SPTA1  | 693_selected_genes |
| chr1 | 158627241 | 158627509 | SPTA1  | 693_selected_genes |
| chr1 | 158631051 | 158631224 | SPTA1  | 693_selected_genes |
| chr1 | 158632466 | 158632760 | SPTA1  | 693_selected_genes |
| chr1 | 158636080 | 158636312 | SPTA1  | 693_selected_genes |
| chr1 | 158637622 | 158637877 | SPTA1  | 693_selected_genes |
| chr1 | 158639172 | 158639378 | SPTA1  | 693_selected_genes |
| chr1 | 158639473 | 158639601 | SPTA1  | 693_selected_genes |
| chr1 | 158641107 | 158641268 | SPTA1  | 693_selected_genes |
| chr1 | 158641823 | 158642011 | SPTA1  | 693_selected_genes |
| chr1 | 158644093 | 158644245 | SPTA1  | 693_selected_genes |
| chr1 | 158644304 | 158644490 | SPTA1  | 693_selected_genes |
| chr1 | 158645905 | 158646110 | SPTA1  | 693_selected_genes |
| chr1 | 158647454 | 158647649 | SPTA1  | 693_selected_genes |
| chr1 | 158648165 | 158648349 | SPTA1  | 693_selected_genes |
| chr1 | 158650347 | 158650544 | SPTA1  | 693_selected_genes |
| chr1 | 158651291 | 158651482 | SPTA1  | 693_selected_genes |
| chr1 | 158653135 | 158653311 | SPTA1  | 693_selected_genes |
| chr1 | 158654872 | 158655162 | SPTA1  | 693_selected_genes |
| chr1 | 158656258 | 158656332 | SPTA1  | 693_selected_genes |
| chr9 | 131328994 | 131329281 | SPTAN1 | 693_selected_genes |
| chr9 | 131331025 | 131331201 | SPTAN1 | 693_selected_genes |
| chr9 | 131336928 | 131337119 | SPTAN1 | 693_selected_genes |
| chr9 | 131337452 | 131337649 | SPTAN1 | 693_selected_genes |
| chr9 | 131339076 | 131339260 | SPTAN1 | 693_selected_genes |
| chr9 | 131339382 | 131339577 | SPTAN1 | 693_selected_genes |
| chr9 | 131339605 | 131339810 | SPTAN1 | 693_selected_genes |
| chr9 | 131340363 | 131340549 | SPTAN1 | 693_selected_genes |
| chr9 | 131341890 | 131342042 | SPTAN1 | 693_selected_genes |
| chr9 | 131343175 | 131343363 | SPTAN1 | 693_selected_genes |
| chr9 | 131344035 | 131344196 | SPTAN1 | 693_selected_genes |
| chr9 | 131344732 | 131344860 | SPTAN1 | 693_selected_genes |
| chr9 | 131344947 | 131345153 | SPTAN1 | 693_selected_genes |
| chr9 | 131345330 | 131345585 | SPTAN1 | 693_selected_genes |
| chr9 | 131346041 | 131346273 | SPTAN1 | 693_selected_genes |
| chr9 | 131346535 | 131346829 | SPTAN1 | 693_selected_genes |
| chr9 | 131346974 | 131347147 | SPTAN1 | 693_selected_genes |
| chr9 | 131348001 | 131348269 | SPTAN1 | 693_selected_genes |
| chr9 | 131349859 | 131350002 | SPTAN1 | 693_selected_genes |
| chr9 | 131351062 | 131351247 | SPTAN1 | 693_selected_genes |
| chr9 | 131353730 | 131353929 | SPTAN1 | 693_selected_genes |
| chr9 | 131355236 | 131355346 | SPTAN1 | 693_selected_genes |
| chr9 | 131356428 | 131356677 | SPTAN1 | 693_selected_genes |
| chr9 | 131360653 | 131360808 | SPTAN1 | 693_selected_genes |
| chr9 | 131361216 | 131361290 | SPTAN1 | 693_selected_genes |
| chr9 | 131362333 | 131362419 | SPTAN1 | 693_selected_genes |
| chr9 | 131365796 | 131365894 | SPTAN1 | 693_selected_genes |
| chr9 | 131366579 | 131366721 | SPTAN1 | 693_selected_genes |
| chr9 | 131367287 | 131367482 | SPTAN1 | 693_selected_genes |
| chr9 | 131367549 | 131367781 | SPTAN1 | 693_selected_genes |
| chr9 | 131369857 | 131370007 | SPTAN1 | 693_selected_genes |
| chr9 | 131370105 | 131370353 | SPTAN1 | 693_selected_genes |
| chr9 | 131370383 | 131370580 | SPTAN1 | 693_selected_genes |
| chr9 | 131371127 | 131371281 | SPTAN1 | 693_selected_genes |
| chr9 | 131371375 | 131371634 | SPTAN1 | 693_selected_genes |
| chr9 | 131371904 | 131371969 | SPTAN1 | 693_selected_genes |
| chr9 | 131373967 | 131374149 | SPTAN1 | 693_selected_genes |
| chr9 | 131374362 | 131374550 | SPTAN1 | 693_selected_genes |
| chr9 | 131375634 | 131375789 | SPTAN1 | 693_selected_genes |
| chr9 | 131377885 | 131378144 | SPTAN1 | 693_selected_genes |
| chr9 | 131379893 | 131380064 | SPTAN1 | 693_selected_genes |
| chr9 | 131380240 | 131380412 | SPTAN1 | 693_selected_genes |
| chr9 | 131381124 | 131381307 | SPTAN1 | 693_selected_genes |
| chr9 | 131383411 | 131383560 | SPTAN1 | 693_selected_genes |
| chr9 | 131386581 | 131386791 | SPTAN1 | 693_selected_genes |
| chr9 | 131387356 | 131387483 | SPTAN1 | 693_selected_genes |
| chr9 | 131388022 | 131388282 | SPTAN1 | 693_selected_genes |
| chr9 | 131388644 | 131388991 | SPTAN1 | 693_selected_genes |
| chr9 | 131389639 | 131389820 | SPTAN1 | 693_selected_genes |
| chr9 | 131390178 | 131390246 | SPTAN1 | 693_selected_genes |
| chr9 | 131392574 | 131392679 | SPTAN1 | 693_selected_genes |

|       |           |           |        |                    |
|-------|-----------|-----------|--------|--------------------|
| chr9  | 131394380 | 131394627 | SPTAN1 | 693_selected_genes |
| chr9  | 131394684 | 131394788 | SPTAN1 | 693_selected_genes |
| chr9  | 131394825 | 131395022 | SPTAN1 | 693_selected_genes |
| chr9  | 131395061 | 131395259 | SPTAN1 | 693_selected_genes |
| chr9  | 131395462 | 131395638 | SPTAN1 | 693_selected_genes |
| chr20 | 36012531  | 36012831  | SRC    | 693_selected_genes |
| chr20 | 36014452  | 36014602  | SRC    | 693_selected_genes |
| chr20 | 36014837  | 36014905  | SRC    | 693_selected_genes |
| chr20 | 36022272  | 36022421  | SRC    | 693_selected_genes |
| chr20 | 36022551  | 36022705  | SRC    | 693_selected_genes |
| chr20 | 36024539  | 36024739  | SRC    | 693_selected_genes |
| chr20 | 36026076  | 36026282  | SRC    | 693_selected_genes |
| chr20 | 36028492  | 36028722  | SRC    | 693_selected_genes |
| chr20 | 36029979  | 36030106  | SRC    | 693_selected_genes |
| chr20 | 36030812  | 36031016  | SRC    | 693_selected_genes |
| chr20 | 36031126  | 36031308  | SRC    | 693_selected_genes |
| chr20 | 36031548  | 36031807  | SRC    | 693_selected_genes |
| chr17 | 74732217  | 74732571  | SRSF2  | 693_selected_genes |
| chr17 | 74732855  | 74733267  | SRSF2  | 693_selected_genes |
| chrX  | 123156452 | 123156546 | STAG2  | 693_selected_genes |
| chrX  | 123159664 | 123159793 | STAG2  | 693_selected_genes |
| chrX  | 123160389 | 123160493 | STAG2  | 693_selected_genes |
| chrX  | 123164785 | 123165000 | STAG2  | 693_selected_genes |
| chrX  | 123171351 | 123171498 | STAG2  | 693_selected_genes |
| chrX  | 123176393 | 123176520 | STAG2  | 693_selected_genes |
| chrX  | 123178988 | 123179243 | STAG2  | 693_selected_genes |
| chrX  | 123181178 | 123181380 | STAG2  | 693_selected_genes |
| chrX  | 123182829 | 123182953 | STAG2  | 693_selected_genes |
| chrX  | 123184010 | 123184184 | STAG2  | 693_selected_genes |
| chrX  | 123184945 | 123185094 | STAG2  | 693_selected_genes |
| chrX  | 123185139 | 123185269 | STAG2  | 693_selected_genes |
| chrX  | 123189952 | 123190110 | STAG2  | 693_selected_genes |
| chrX  | 123191690 | 123191852 | STAG2  | 693_selected_genes |
| chrX  | 123195048 | 123195216 | STAG2  | 693_selected_genes |
| chrX  | 123195595 | 123195749 | STAG2  | 693_selected_genes |
| chrX  | 123196726 | 123196869 | STAG2  | 693_selected_genes |
| chrX  | 123196940 | 123197080 | STAG2  | 693_selected_genes |
| chrX  | 123197672 | 123197926 | STAG2  | 693_selected_genes |
| chrX  | 123199700 | 123199821 | STAG2  | 693_selected_genes |
| chrX  | 123199999 | 123200137 | STAG2  | 693_selected_genes |
| chrX  | 123200180 | 123200311 | STAG2  | 693_selected_genes |
| chrX  | 123202388 | 123202531 | STAG2  | 693_selected_genes |
| chrX  | 123204973 | 123205198 | STAG2  | 693_selected_genes |
| chrX  | 123210156 | 123210346 | STAG2  | 693_selected_genes |
| chrX  | 123211781 | 123211933 | STAG2  | 693_selected_genes |
| chrX  | 123215204 | 123215403 | STAG2  | 693_selected_genes |
| chrX  | 123217245 | 123217424 | STAG2  | 693_selected_genes |
| chrX  | 123220371 | 123220645 | STAG2  | 693_selected_genes |
| chrX  | 123224399 | 123224639 | STAG2  | 693_selected_genes |
| chrX  | 123224678 | 123224839 | STAG2  | 693_selected_genes |
| chrX  | 123227842 | 123228019 | STAG2  | 693_selected_genes |
| chrX  | 123229196 | 123229324 | STAG2  | 693_selected_genes |
| chrX  | 123234398 | 123234472 | STAG2  | 693_selected_genes |
| chr17 | 40467737  | 40467843  | STAT3  | 693_selected_genes |
| chr17 | 40468781  | 40468944  | STAT3  | 693_selected_genes |
| chr17 | 40469174  | 40469267  | STAT3  | 693_selected_genes |
| chr17 | 40474274  | 40474537  | STAT3  | 693_selected_genes |
| chr17 | 40474996  | 40475186  | STAT3  | 693_selected_genes |
| chr17 | 40475252  | 40475397  | STAT3  | 693_selected_genes |
| chr17 | 40475565  | 40475668  | STAT3  | 693_selected_genes |
| chr17 | 40476703  | 40476889  | STAT3  | 693_selected_genes |
| chr17 | 40476955  | 40477104  | STAT3  | 693_selected_genes |
| chr17 | 40478108  | 40478242  | STAT3  | 693_selected_genes |
| chr17 | 40481402  | 40481500  | STAT3  | 693_selected_genes |
| chr17 | 40481546  | 40481690  | STAT3  | 693_selected_genes |
| chr17 | 40481739  | 40481819  | STAT3  | 693_selected_genes |
| chr17 | 40483464  | 40483574  | STAT3  | 693_selected_genes |
| chr17 | 40485665  | 40485808  | STAT3  | 693_selected_genes |
| chr17 | 40485883  | 40486092  | STAT3  | 693_selected_genes |
| chr17 | 40489427  | 40489629  | STAT3  | 693_selected_genes |
| chr17 | 40489755  | 40489900  | STAT3  | 693_selected_genes |
| chr17 | 40490723  | 40490855  | STAT3  | 693_selected_genes |
| chr17 | 40491306  | 40491452  | STAT3  | 693_selected_genes |
| chr17 | 40497551  | 40497700  | STAT3  | 693_selected_genes |
| chr17 | 40498561  | 40498756  | STAT3  | 693_selected_genes |
| chr17 | 40500381  | 40500560  | STAT3  | 693_selected_genes |
| chr17 | 40526051  | 40526106  | STAT3  | 693_selected_genes |
| chr2  | 191894540 | 191894617 | STAT4  | 693_selected_genes |
| chr2  | 191895672 | 191895831 | STAT4  | 693_selected_genes |
| chr2  | 191896150 | 191896267 | STAT4  | 693_selected_genes |
| chr2  | 191897658 | 191897900 | STAT4  | 693_selected_genes |
| chr2  | 191898190 | 191898377 | STAT4  | 693_selected_genes |
| chr2  | 191898611 | 191898756 | STAT4  | 693_selected_genes |
| chr2  | 191899248 | 191899348 | STAT4  | 693_selected_genes |

|       |           |           |         |                    |
|-------|-----------|-----------|---------|--------------------|
| chr2  | 191900864 | 191901050 | STAT4   | 693_selected_genes |
| chr2  | 191903899 | 191904048 | STAT4   | 693_selected_genes |
| chr2  | 191905765 | 191905899 | STAT4   | 693_selected_genes |
| chr2  | 191919190 | 191919285 | STAT4   | 693_selected_genes |
| chr2  | 191922718 | 191922862 | STAT4   | 693_selected_genes |
| chr2  | 191922902 | 191922970 | STAT4   | 693_selected_genes |
| chr2  | 191923410 | 191923520 | STAT4   | 693_selected_genes |
| chr2  | 191926429 | 191926572 | STAT4   | 693_selected_genes |
| chr2  | 191927462 | 191927671 | STAT4   | 693_selected_genes |
| chr2  | 191929507 | 191929709 | STAT4   | 693_selected_genes |
| chr2  | 191931130 | 191931266 | STAT4   | 693_selected_genes |
| chr2  | 191934393 | 191934522 | STAT4   | 693_selected_genes |
| chr2  | 191937798 | 191937941 | STAT4   | 693_selected_genes |
| chr2  | 191940927 | 191941076 | STAT4   | 693_selected_genes |
| chr2  | 191996520 | 191996651 | STAT4   | 693_selected_genes |
| chr2  | 192011313 | 192011508 | STAT4   | 693_selected_genes |
| chr2  | 192012776 | 192012954 | STAT4   | 693_selected_genes |
| chr19 | 1206887   | 1207227   | STK11   | 693_selected_genes |
| chr19 | 1216241   | 1216307   | STK11   | 693_selected_genes |
| chr19 | 1218390   | 1218524   | STK11   | 693_selected_genes |
| chr19 | 1219297   | 1219437   | STK11   | 693_selected_genes |
| chr19 | 1220346   | 1220529   | STK11   | 693_selected_genes |
| chr19 | 1220554   | 1220741   | STK11   | 693_selected_genes |
| chr19 | 1221186   | 1221364   | STK11   | 693_selected_genes |
| chr19 | 1221922   | 1222030   | STK11   | 693_selected_genes |
| chr19 | 1222958   | 1223196   | STK11   | 693_selected_genes |
| chr19 | 1226427   | 1226687   | STK11   | 693_selected_genes |
| chr19 | 1227566   | 1227881   | STK11   | 693_selected_genes |
| chr1  | 36807330  | 36807599  | STK40   | 693_selected_genes |
| chr1  | 36808774  | 36809074  | STK40   | 693_selected_genes |
| chr1  | 36809435  | 36809605  | STK40   | 693_selected_genes |
| chr1  | 36809695  | 36809890  | STK40   | 693_selected_genes |
| chr1  | 36814275  | 36814441  | STK40   | 693_selected_genes |
| chr1  | 36819939  | 36820042  | STK40   | 693_selected_genes |
| chr1  | 36820781  | 36821059  | STK40   | 693_selected_genes |
| chr1  | 36823814  | 36824008  | STK40   | 693_selected_genes |
| chr1  | 36824312  | 36824463  | STK40   | 693_selected_genes |
| chr1  | 36826796  | 36826958  | STK40   | 693_selected_genes |
| chr10 | 104263884 | 104264116 | SUFU    | 693_selected_genes |
| chr10 | 104268900 | 104269085 | SUFU    | 693_selected_genes |
| chr10 | 104309701 | 104309888 | SUFU    | 693_selected_genes |
| chr10 | 104352313 | 104352506 | SUFU    | 693_selected_genes |
| chr10 | 104353367 | 104353503 | SUFU    | 693_selected_genes |
| chr10 | 104353724 | 104353847 | SUFU    | 693_selected_genes |
| chr10 | 104356871 | 104357075 | SUFU    | 693_selected_genes |
| chr10 | 104359164 | 104359326 | SUFU    | 693_selected_genes |
| chr10 | 104374999 | 104375184 | SUFU    | 693_selected_genes |
| chr10 | 104377021 | 104377360 | SUFU    | 693_selected_genes |
| chr10 | 104378797 | 104378853 | SUFU    | 693_selected_genes |
| chr10 | 104386906 | 104387025 | SUFU    | 693_selected_genes |
| chr10 | 104389797 | 104389937 | SUFU    | 693_selected_genes |
| chr16 | 28617116  | 28617279  | SULT1A1 | 693_selected_genes |
| chr16 | 28617351  | 28617582  | SULT1A1 | 693_selected_genes |
| chr16 | 28618056  | 28618201  | SULT1A1 | 693_selected_genes |
| chr16 | 28618246  | 28618423  | SULT1A1 | 693_selected_genes |
| chr16 | 28619586  | 28619734  | SULT1A1 | 693_selected_genes |
| chr16 | 28619773  | 28619949  | SULT1A1 | 693_selected_genes |
| chr16 | 28620003  | 28620205  | SULT1A1 | 693_selected_genes |
| chr16 | 28621454  | 28621537  | SULT1A1 | 693_selected_genes |
| chr16 | 28631358  | 28631479  | SULT1A1 | 693_selected_genes |
| chr16 | 28634426  | 28634543  | SULT1A1 | 693_selected_genes |
| chr17 | 30264240  | 30264564  | SUZ12   | 693_selected_genes |
| chr17 | 30267279  | 30267376  | SUZ12   | 693_selected_genes |
| chr17 | 30267415  | 30267530  | SUZ12   | 693_selected_genes |
| chr17 | 30274610  | 30274729  | SUZ12   | 693_selected_genes |
| chr17 | 30293140  | 30293240  | SUZ12   | 693_selected_genes |
| chr17 | 30300139  | 30300275  | SUZ12   | 693_selected_genes |
| chr17 | 30302475  | 30302757  | SUZ12   | 693_selected_genes |
| chr17 | 30303514  | 30303658  | SUZ12   | 693_selected_genes |
| chr17 | 30309992  | 30310148  | SUZ12   | 693_selected_genes |
| chr17 | 30315313  | 30315541  | SUZ12   | 693_selected_genes |
| chr17 | 30320235  | 30320377  | SUZ12   | 693_selected_genes |
| chr17 | 30320858  | 30321052  | SUZ12   | 693_selected_genes |
| chr17 | 30321557  | 30321765  | SUZ12   | 693_selected_genes |
| chr17 | 30322557  | 30322806  | SUZ12   | 693_selected_genes |
| chr17 | 30323791  | 30323921  | SUZ12   | 693_selected_genes |
| chr17 | 30325651  | 30326047  | SUZ12   | 693_selected_genes |
| chr9  | 93606155  | 93606622  | SYK     | 693_selected_genes |
| chr9  | 93607690  | 93607901  | SYK     | 693_selected_genes |
| chr9  | 93624462  | 93624651  | SYK     | 693_selected_genes |
| chr9  | 93626845  | 93626974  | SYK     | 693_selected_genes |
| chr9  | 93627304  | 93627404  | SYK     | 693_selected_genes |
| chr9  | 93629387  | 93629506  | SYK     | 693_selected_genes |
| chr9  | 93636460  | 93636598  | SYK     | 693_selected_genes |

|      |           |           |       |                    |
|------|-----------|-----------|-------|--------------------|
| chr9 | 93636928  | 93637156  | SYK   | 693_selected_genes |
| chr9 | 93639827  | 93640087  | SYK   | 693_selected_genes |
| chr9 | 93641020  | 93641260  | SYK   | 693_selected_genes |
| chr9 | 93650005  | 93650196  | SYK   | 693_selected_genes |
| chr9 | 93650771  | 93650934  | SYK   | 693_selected_genes |
| chr9 | 93657784  | 93657907  | SYK   | 693_selected_genes |
| chr6 | 152443545 | 152443836 | SYNE1 | 693_selected_genes |
| chr6 | 152451829 | 152451938 | SYNE1 | 693_selected_genes |
| chr6 | 152453231 | 152453374 | SYNE1 | 693_selected_genes |
| chr6 | 152454385 | 152454648 | SYNE1 | 693_selected_genes |
| chr6 | 152456213 | 152456392 | SYNE1 | 693_selected_genes |
| chr6 | 152457727 | 152457978 | SYNE1 | 693_selected_genes |
| chr6 | 152461059 | 152461321 | SYNE1 | 693_selected_genes |
| chr6 | 152462312 | 152462489 | SYNE1 | 693_selected_genes |
| chr6 | 152464732 | 152464925 | SYNE1 | 693_selected_genes |
| chr6 | 152466596 | 152466715 | SYNE1 | 693_selected_genes |
| chr6 | 152469154 | 152469538 | SYNE1 | 693_selected_genes |
| chr6 | 152470586 | 152470828 | SYNE1 | 693_selected_genes |
| chr6 | 152472662 | 152472850 | SYNE1 | 693_selected_genes |
| chr6 | 152473068 | 152473301 | SYNE1 | 693_selected_genes |
| chr6 | 152476001 | 152476202 | SYNE1 | 693_selected_genes |
| chr6 | 152477019 | 152477257 | SYNE1 | 693_selected_genes |
| chr6 | 152485272 | 152485485 | SYNE1 | 693_selected_genes |
| chr6 | 152489222 | 152489364 | SYNE1 | 693_selected_genes |
| chr6 | 152497503 | 152497720 | SYNE1 | 693_selected_genes |
| chr6 | 152501245 | 152501454 | SYNE1 | 693_selected_genes |
| chr6 | 152510361 | 152510567 | SYNE1 | 693_selected_genes |
| chr6 | 152522933 | 152523109 | SYNE1 | 693_selected_genes |
| chr6 | 152527277 | 152527522 | SYNE1 | 693_selected_genes |
| chr6 | 152529081 | 152529366 | SYNE1 | 693_selected_genes |
| chr6 | 152532603 | 152532748 | SYNE1 | 693_selected_genes |
| chr6 | 152534721 | 152534919 | SYNE1 | 693_selected_genes |
| chr6 | 152536015 | 152536220 | SYNE1 | 693_selected_genes |
| chr6 | 152539366 | 152539563 | SYNE1 | 693_selected_genes |
| chr6 | 152540112 | 152540345 | SYNE1 | 693_selected_genes |
| chr6 | 152541951 | 152542206 | SYNE1 | 693_selected_genes |
| chr6 | 152542535 | 152542719 | SYNE1 | 693_selected_genes |
| chr6 | 152545603 | 152545824 | SYNE1 | 693_selected_genes |
| chr6 | 152546830 | 152547036 | SYNE1 | 693_selected_genes |
| chr6 | 152551656 | 152551862 | SYNE1 | 693_selected_genes |
| chr6 | 152552500 | 152552727 | SYNE1 | 693_selected_genes |
| chr6 | 152553225 | 152553425 | SYNE1 | 693_selected_genes |
| chr6 | 152554890 | 152555123 | SYNE1 | 693_selected_genes |
| chr6 | 152555777 | 152555960 | SYNE1 | 693_selected_genes |
| chr6 | 152557216 | 152557463 | SYNE1 | 693_selected_genes |
| chr6 | 152557926 | 152558108 | SYNE1 | 693_selected_genes |
| chr6 | 152560642 | 152560866 | SYNE1 | 693_selected_genes |
| chr6 | 152563349 | 152563600 | SYNE1 | 693_selected_genes |
| chr6 | 152565646 | 152565816 | SYNE1 | 693_selected_genes |
| chr6 | 152570270 | 152570422 | SYNE1 | 693_selected_genes |
| chr6 | 152575989 | 152576249 | SYNE1 | 693_selected_genes |
| chr6 | 152576700 | 152576906 | SYNE1 | 693_selected_genes |
| chr6 | 152577743 | 152577925 | SYNE1 | 693_selected_genes |
| chr6 | 152583141 | 152583348 | SYNE1 | 693_selected_genes |
| chr6 | 152589165 | 152589325 | SYNE1 | 693_selected_genes |
| chr6 | 152590264 | 152590446 | SYNE1 | 693_selected_genes |
| chr6 | 152599198 | 152599440 | SYNE1 | 693_selected_genes |
| chr6 | 152602916 | 152603140 | SYNE1 | 693_selected_genes |
| chr6 | 152605087 | 152605332 | SYNE1 | 693_selected_genes |
| chr6 | 152614697 | 152614909 | SYNE1 | 693_selected_genes |
| chr6 | 152615069 | 152615287 | SYNE1 | 693_selected_genes |
| chr6 | 152621750 | 152621941 | SYNE1 | 693_selected_genes |
| chr6 | 152622978 | 152623235 | SYNE1 | 693_selected_genes |
| chr6 | 152629598 | 152629792 | SYNE1 | 693_selected_genes |
| chr6 | 152630940 | 152631177 | SYNE1 | 693_selected_genes |
| chr6 | 152631505 | 152631678 | SYNE1 | 693_selected_genes |
| chr6 | 152631797 | 152632033 | SYNE1 | 693_selected_genes |
| chr6 | 152637958 | 152638146 | SYNE1 | 693_selected_genes |
| chr6 | 152639190 | 152639423 | SYNE1 | 693_selected_genes |
| chr6 | 152639972 | 152640175 | SYNE1 | 693_selected_genes |
| chr6 | 152642347 | 152642550 | SYNE1 | 693_selected_genes |
| chr6 | 152642830 | 152643046 | SYNE1 | 693_selected_genes |
| chr6 | 152644587 | 152644897 | SYNE1 | 693_selected_genes |
| chr6 | 152646193 | 152646462 | SYNE1 | 693_selected_genes |
| chr6 | 152647067 | 152647262 | SYNE1 | 693_selected_genes |
| chr6 | 152647405 | 152647793 | SYNE1 | 693_selected_genes |
| chr6 | 152650839 | 152653050 | SYNE1 | 693_selected_genes |
| chr6 | 152655117 | 152655433 | SYNE1 | 693_selected_genes |
| chr6 | 152657950 | 152658177 | SYNE1 | 693_selected_genes |
| chr6 | 152660350 | 152660526 | SYNE1 | 693_selected_genes |
| chr6 | 152665190 | 152665387 | SYNE1 | 693_selected_genes |
| chr6 | 152668168 | 152668395 | SYNE1 | 693_selected_genes |
| chr6 | 152671277 | 152671495 | SYNE1 | 693_selected_genes |
| chr6 | 152671727 | 152671930 | SYNE1 | 693_selected_genes |

|      |           |           |       |                    |
|------|-----------|-----------|-------|--------------------|
| chr6 | 152673136 | 152673513 | SYNE1 | 693_selected_genes |
| chr6 | 152674372 | 152674593 | SYNE1 | 693_selected_genes |
| chr6 | 152674698 | 152674904 | SYNE1 | 693_selected_genes |
| chr6 | 152675768 | 152676136 | SYNE1 | 693_selected_genes |
| chr6 | 152679482 | 152679697 | SYNE1 | 693_selected_genes |
| chr6 | 152680424 | 152680618 | SYNE1 | 693_selected_genes |
| chr6 | 152683279 | 152683483 | SYNE1 | 693_selected_genes |
| chr6 | 152684835 | 152684934 | SYNE1 | 693_selected_genes |
| chr6 | 152685956 | 152686179 | SYNE1 | 693_selected_genes |
| chr6 | 152688114 | 152688542 | SYNE1 | 693_selected_genes |
| chr6 | 152690081 | 152690287 | SYNE1 | 693_selected_genes |
| chr6 | 152690580 | 152690774 | SYNE1 | 693_selected_genes |
| chr6 | 152694146 | 152694379 | SYNE1 | 693_selected_genes |
| chr6 | 152697490 | 152697718 | SYNE1 | 693_selected_genes |
| chr6 | 152697885 | 152698072 | SYNE1 | 693_selected_genes |
| chr6 | 152702115 | 152702522 | SYNE1 | 693_selected_genes |
| chr6 | 152706783 | 152706998 | SYNE1 | 693_selected_genes |
| chr6 | 152708181 | 152708541 | SYNE1 | 693_selected_genes |
| chr6 | 152711389 | 152711612 | SYNE1 | 693_selected_genes |
| chr6 | 152712386 | 152712728 | SYNE1 | 693_selected_genes |
| chr6 | 152716625 | 152716831 | SYNE1 | 693_selected_genes |
| chr6 | 152717884 | 152718143 | SYNE1 | 693_selected_genes |
| chr6 | 152719728 | 152719894 | SYNE1 | 693_selected_genes |
| chr6 | 152720725 | 152720983 | SYNE1 | 693_selected_genes |
| chr6 | 152722247 | 152722501 | SYNE1 | 693_selected_genes |
| chr6 | 152725322 | 152725474 | SYNE1 | 693_selected_genes |
| chr6 | 152728123 | 152728356 | SYNE1 | 693_selected_genes |
| chr6 | 152730177 | 152730386 | SYNE1 | 693_selected_genes |
| chr6 | 152730668 | 152730869 | SYNE1 | 693_selected_genes |
| chr6 | 152734461 | 152734691 | SYNE1 | 693_selected_genes |
| chr6 | 152737496 | 152738175 | SYNE1 | 693_selected_genes |
| chr6 | 152740678 | 152740882 | SYNE1 | 693_selected_genes |
| chr6 | 152746490 | 152746707 | SYNE1 | 693_selected_genes |
| chr6 | 152748724 | 152748976 | SYNE1 | 693_selected_genes |
| chr6 | 152749314 | 152749552 | SYNE1 | 693_selected_genes |
| chr6 | 152751221 | 152751370 | SYNE1 | 693_selected_genes |
| chr6 | 152751591 | 152751869 | SYNE1 | 693_selected_genes |
| chr6 | 152754904 | 152755105 | SYNE1 | 693_selected_genes |
| chr6 | 152757028 | 152757261 | SYNE1 | 693_selected_genes |
| chr6 | 152762239 | 152762430 | SYNE1 | 693_selected_genes |
| chr6 | 152763184 | 152763405 | SYNE1 | 693_selected_genes |
| chr6 | 152765520 | 152765738 | SYNE1 | 693_selected_genes |
| chr6 | 152768567 | 152768782 | SYNE1 | 693_selected_genes |
| chr6 | 152770642 | 152770801 | SYNE1 | 693_selected_genes |
| chr6 | 152771734 | 152771993 | SYNE1 | 693_selected_genes |
| chr6 | 152772156 | 152772365 | SYNE1 | 693_selected_genes |
| chr6 | 152774584 | 152774880 | SYNE1 | 693_selected_genes |
| chr6 | 152776535 | 152776794 | SYNE1 | 693_selected_genes |
| chr6 | 152776995 | 152777204 | SYNE1 | 693_selected_genes |
| chr6 | 152777777 | 152777962 | SYNE1 | 693_selected_genes |
| chr6 | 152779866 | 152780090 | SYNE1 | 693_selected_genes |
| chr6 | 152782706 | 152782900 | SYNE1 | 693_selected_genes |
| chr6 | 152783832 | 152784050 | SYNE1 | 693_selected_genes |
| chr6 | 152784462 | 152784677 | SYNE1 | 693_selected_genes |
| chr6 | 152786367 | 152786620 | SYNE1 | 693_selected_genes |
| chr6 | 152787091 | 152787238 | SYNE1 | 693_selected_genes |
| chr6 | 152792706 | 152792925 | SYNE1 | 693_selected_genes |
| chr6 | 152793410 | 152793573 | SYNE1 | 693_selected_genes |
| chr6 | 152793680 | 152793781 | SYNE1 | 693_selected_genes |
| chr6 | 152801870 | 152801941 | SYNE1 | 693_selected_genes |
| chr6 | 152804194 | 152804409 | SYNE1 | 693_selected_genes |
| chr6 | 152805943 | 152806132 | SYNE1 | 693_selected_genes |
| chr6 | 152809505 | 152809663 | SYNE1 | 693_selected_genes |
| chr6 | 152819851 | 152819952 | SYNE1 | 693_selected_genes |
| chr6 | 152823742 | 152823902 | SYNE1 | 693_selected_genes |
| chr6 | 152826310 | 152826557 | SYNE1 | 693_selected_genes |
| chr6 | 152831302 | 152831531 | SYNE1 | 693_selected_genes |
| chr6 | 152832120 | 152832263 | SYNE1 | 693_selected_genes |
| chr6 | 152832680 | 152832751 | SYNE1 | 693_selected_genes |
| chr6 | 152841568 | 152841702 | SYNE1 | 693_selected_genes |
| chr6 | 152847189 | 152847335 | SYNE1 | 693_selected_genes |
| chr6 | 152861069 | 152861181 | SYNE1 | 693_selected_genes |
| chr6 | 152949374 | 152949491 | SYNE1 | 693_selected_genes |
| chrX | 70586139  | 70586369  | TAF1  | 693_selected_genes |
| chrX | 70587323  | 70587488  | TAF1  | 693_selected_genes |
| chrX | 70587878  | 70588045  | TAF1  | 693_selected_genes |
| chrX | 70594991  | 70595161  | TAF1  | 693_selected_genes |
| chrX | 70596774  | 70597066  | TAF1  | 693_selected_genes |
| chrX | 70597427  | 70597696  | TAF1  | 693_selected_genes |
| chrX | 70598059  | 70598328  | TAF1  | 693_selected_genes |
| chrX | 70598648  | 70598906  | TAF1  | 693_selected_genes |
| chrX | 70601567  | 70601794  | TAF1  | 693_selected_genes |
| chrX | 70602360  | 70602538  | TAF1  | 693_selected_genes |
| chrX | 70602585  | 70602743  | TAF1  | 693_selected_genes |

|       |           |           |         |                    |
|-------|-----------|-----------|---------|--------------------|
| chrX  | 70602815  | 70603039  | TAF1    | 693_selected_genes |
| chrX  | 70603786  | 70604010  | TAF1    | 693_selected_genes |
| chrX  | 70604769  | 70604924  | TAF1    | 693_selected_genes |
| chrX  | 70607085  | 70607336  | TAF1    | 693_selected_genes |
| chrX  | 70608061  | 70608253  | TAF1    | 693_selected_genes |
| chrX  | 70608562  | 70608743  | TAF1    | 693_selected_genes |
| chrX  | 70609409  | 70609540  | TAF1    | 693_selected_genes |
| chrX  | 70612393  | 70612593  | TAF1    | 693_selected_genes |
| chrX  | 70612699  | 70612869  | TAF1    | 693_selected_genes |
| chrX  | 70613125  | 70613351  | TAF1    | 693_selected_genes |
| chrX  | 70613891  | 70614120  | TAF1    | 693_selected_genes |
| chrX  | 70617077  | 70617341  | TAF1    | 693_selected_genes |
| chrX  | 70618396  | 70618612  | TAF1    | 693_selected_genes |
| chrX  | 70621352  | 70621614  | TAF1    | 693_selected_genes |
| chrX  | 70626462  | 70626621  | TAF1    | 693_selected_genes |
| chrX  | 70627398  | 70627547  | TAF1    | 693_selected_genes |
| chrX  | 70627798  | 70628026  | TAF1    | 693_selected_genes |
| chrX  | 70636442  | 70636566  | TAF1    | 693_selected_genes |
| chrX  | 70641133  | 70641251  | TAF1    | 693_selected_genes |
| chrX  | 70642941  | 70643114  | TAF1    | 693_selected_genes |
| chrX  | 70643798  | 70643941  | TAF1    | 693_selected_genes |
| chrX  | 70643978  | 70644113  | TAF1    | 693_selected_genes |
| chrX  | 70673994  | 70674112  | TAF1    | 693_selected_genes |
| chrX  | 70674565  | 70674736  | TAF1    | 693_selected_genes |
| chrX  | 70674831  | 70674887  | TAF1    | 693_selected_genes |
| chrX  | 70678063  | 70678241  | TAF1    | 693_selected_genes |
| chrX  | 70678974  | 70679126  | TAF1    | 693_selected_genes |
| chrX  | 70679376  | 70679583  | TAF1    | 693_selected_genes |
| chrX  | 70680450  | 70680678  | TAF1    | 693_selected_genes |
| chrX  | 70683648  | 70683921  | TAF1    | 693_selected_genes |
| chrX  | 70748366  | 70748600  | TAF1    | 693_selected_genes |
| chrX  | 70749537  | 70749598  | TAF1    | 693_selected_genes |
| chr6  | 32813330  | 32813587  | TAP1    | 693_selected_genes |
| chr6  | 32814819  | 32815006  | TAP1    | 693_selected_genes |
| chr6  | 32815264  | 32815477  | TAP1    | 693_selected_genes |
| chr6  | 32815670  | 32815894  | TAP1    | 693_selected_genes |
| chr6  | 32816403  | 32816642  | TAP1    | 693_selected_genes |
| chr6  | 32816741  | 32816920  | TAP1    | 693_selected_genes |
| chr6  | 32818071  | 32818319  | TAP1    | 693_selected_genes |
| chr6  | 32818695  | 32818951  | TAP1    | 693_selected_genes |
| chr6  | 32819860  | 32820041  | TAP1    | 693_selected_genes |
| chr6  | 32820139  | 32820304  | TAP1    | 693_selected_genes |
| chr6  | 32820790  | 32821618  | TAP1    | 693_selected_genes |
| chr3  | 176743260 | 176743337 | TBL1XR1 | 693_selected_genes |
| chr3  | 176744135 | 176744287 | TBL1XR1 | 693_selected_genes |
| chr3  | 176750733 | 176750949 | TBL1XR1 | 693_selected_genes |
| chr3  | 176751960 | 176752138 | TBL1XR1 | 693_selected_genes |
| chr3  | 176755860 | 176755985 | TBL1XR1 | 693_selected_genes |
| chr3  | 176756075 | 176756247 | TBL1XR1 | 693_selected_genes |
| chr3  | 176763891 | 176764002 | TBL1XR1 | 693_selected_genes |
| chr3  | 176765062 | 176765210 | TBL1XR1 | 693_selected_genes |
| chr3  | 176765248 | 176765362 | TBL1XR1 | 693_selected_genes |
| chr3  | 176767759 | 176767951 | TBL1XR1 | 693_selected_genes |
| chr3  | 176768240 | 176768423 | TBL1XR1 | 693_selected_genes |
| chr3  | 176769266 | 176769539 | TBL1XR1 | 693_selected_genes |
| chr3  | 176771535 | 176771731 | TBL1XR1 | 693_selected_genes |
| chr3  | 176782682 | 176782790 | TBL1XR1 | 693_selected_genes |
| chr12 | 115109620 | 115110132 | TBX3    | 693_selected_genes |
| chr12 | 115111944 | 115112665 | TBX3    | 693_selected_genes |
| chr12 | 115114092 | 115114300 | TBX3    | 693_selected_genes |
| chr12 | 115115359 | 115115486 | TBX3    | 693_selected_genes |
| chr12 | 115117284 | 115117481 | TBX3    | 693_selected_genes |
| chr12 | 115117692 | 115117802 | TBX3    | 693_selected_genes |
| chr12 | 115118658 | 115118976 | TBX3    | 693_selected_genes |
| chr12 | 115120591 | 115121030 | TBX3    | 693_selected_genes |
| chr15 | 57212086  | 57212211  | TCF12   | 693_selected_genes |
| chr15 | 57213198  | 57213321  | TCF12   | 693_selected_genes |
| chr15 | 57355922  | 57356046  | TCF12   | 693_selected_genes |
| chr15 | 57364825  | 57364937  | TCF12   | 693_selected_genes |
| chr15 | 57383961  | 57384114  | TCF12   | 693_selected_genes |
| chr15 | 57458574  | 57458689  | TCF12   | 693_selected_genes |
| chr15 | 57484330  | 57484516  | TCF12   | 693_selected_genes |
| chr15 | 57489945  | 57490048  | TCF12   | 693_selected_genes |
| chr15 | 57511694  | 57511813  | TCF12   | 693_selected_genes |
| chr15 | 57523324  | 57523480  | TCF12   | 693_selected_genes |
| chr15 | 57524463  | 57524653  | TCF12   | 693_selected_genes |
| chr15 | 57524884  | 57525079  | TCF12   | 693_selected_genes |
| chr15 | 57526215  | 57526330  | TCF12   | 693_selected_genes |
| chr15 | 57535644  | 57535773  | TCF12   | 693_selected_genes |
| chr15 | 57540238  | 57540304  | TCF12   | 693_selected_genes |
| chr15 | 57543522  | 57543646  | TCF12   | 693_selected_genes |
| chr15 | 57544593  | 57544715  | TCF12   | 693_selected_genes |
| chr15 | 57545434  | 57545691  | TCF12   | 693_selected_genes |
| chr15 | 57554266  | 57554431  | TCF12   | 693_selected_genes |

|       |           |           |        |                    |
|-------|-----------|-----------|--------|--------------------|
| chr15 | 57555284  | 57555497  | TCF12  | 693_selected_genes |
| chr15 | 57565202  | 57565485  | TCF12  | 693_selected_genes |
| chr15 | 57574615  | 57574810  | TCF12  | 693_selected_genes |
| chr19 | 1611680   | 1611873   | TCF3   | 693_selected_genes |
| chr19 | 1612180   | 1612457   | TCF3   | 693_selected_genes |
| chr19 | 1615258   | 1615845   | TCF3   | 693_selected_genes |
| chr19 | 1619083   | 1619258   | TCF3   | 693_selected_genes |
| chr19 | 1619289   | 1619498   | TCF3   | 693_selected_genes |
| chr19 | 1619753   | 1619877   | TCF3   | 693_selected_genes |
| chr19 | 1620941   | 1621071   | TCF3   | 693_selected_genes |
| chr19 | 1621106   | 1621215   | TCF3   | 693_selected_genes |
| chr19 | 1621811   | 1621994   | TCF3   | 693_selected_genes |
| chr19 | 1622027   | 1622247   | TCF3   | 693_selected_genes |
| chr19 | 1622286   | 1622439   | TCF3   | 693_selected_genes |
| chr19 | 1623921   | 1624024   | TCF3   | 693_selected_genes |
| chr19 | 1625549   | 1625732   | TCF3   | 693_selected_genes |
| chr19 | 1627332   | 1627450   | TCF3   | 693_selected_genes |
| chr19 | 1631920   | 1632140   | TCF3   | 693_selected_genes |
| chr19 | 1632305   | 1632429   | TCF3   | 693_selected_genes |
| chr19 | 1646328   | 1646451   | TCF3   | 693_selected_genes |
| chr19 | 1650150   | 1650272   | TCF3   | 693_selected_genes |
| chr10 | 114710490 | 114710729 | TCF7L2 | 693_selected_genes |
| chr10 | 114710940 | 114711057 | TCF7L2 | 693_selected_genes |
| chr10 | 114711216 | 114711391 | TCF7L2 | 693_selected_genes |
| chr10 | 114724289 | 114724408 | TCF7L2 | 693_selected_genes |
| chr10 | 114799758 | 114799910 | TCF7L2 | 693_selected_genes |
| chr10 | 114849130 | 114849324 | TCF7L2 | 693_selected_genes |
| chr10 | 114900917 | 114901100 | TCF7L2 | 693_selected_genes |
| chr10 | 114903656 | 114903809 | TCF7L2 | 693_selected_genes |
| chr10 | 114905744 | 114905885 | TCF7L2 | 693_selected_genes |
| chr10 | 114910716 | 114910907 | TCF7L2 | 693_selected_genes |
| chr10 | 114911458 | 114911668 | TCF7L2 | 693_selected_genes |
| chr10 | 114912066 | 114912224 | TCF7L2 | 693_selected_genes |
| chr10 | 114917754 | 114917853 | TCF7L2 | 693_selected_genes |
| chr10 | 114918400 | 114918501 | TCF7L2 | 693_selected_genes |
| chr10 | 114919653 | 114919776 | TCF7L2 | 693_selected_genes |
| chr10 | 114920352 | 114920475 | TCF7L2 | 693_selected_genes |
| chr10 | 114921312 | 114921369 | TCF7L2 | 693_selected_genes |
| chr10 | 114925288 | 114925756 | TCF7L2 | 693_selected_genes |
| chr5  | 1253817   | 1253971   | TERT   | 693_selected_genes |
| chr5  | 1254457   | 1254645   | TERT   | 693_selected_genes |
| chr5  | 1255376   | 1255551   | TERT   | 693_selected_genes |
| chr5  | 1258687   | 1258799   | TERT   | 693_selected_genes |
| chr5  | 1260563   | 1260740   | TERT   | 693_selected_genes |
| chr5  | 1264493   | 1264732   | TERT   | 693_selected_genes |
| chr5  | 1266553   | 1266675   | TERT   | 693_selected_genes |
| chr5  | 1268609   | 1268773   | TERT   | 693_selected_genes |
| chr5  | 1271208   | 1271344   | TERT   | 693_selected_genes |
| chr5  | 1272274   | 1272420   | TERT   | 693_selected_genes |
| chr5  | 1278730   | 1278936   | TERT   | 693_selected_genes |
| chr5  | 1279380   | 1279610   | TERT   | 693_selected_genes |
| chr5  | 1280247   | 1280478   | TERT   | 693_selected_genes |
| chr5  | 1282518   | 1282764   | TERT   | 693_selected_genes |
| chr5  | 1293402   | 1294806   | TERT   | 693_selected_genes |
| chr5  | 1294860   | 1295129   | TERT   | 693_selected_genes |
| chr10 | 70332070  | 70334034  | TET1   | 693_selected_genes |
| chr10 | 70360712  | 70360816  | TET1   | 693_selected_genes |
| chr10 | 70404429  | 70406787  | TET1   | 693_selected_genes |
| chr10 | 70411577  | 70411718  | TET1   | 693_selected_genes |
| chr10 | 70412232  | 70412376  | TET1   | 693_selected_genes |
| chr10 | 70426776  | 70427038  | TET1   | 693_selected_genes |
| chr10 | 70432626  | 70432827  | TET1   | 693_selected_genes |
| chr10 | 70441130  | 70441270  | TET1   | 693_selected_genes |
| chr10 | 70442567  | 70442755  | TET1   | 693_selected_genes |
| chr10 | 70446087  | 70446489  | TET1   | 693_selected_genes |
| chr10 | 70450539  | 70451596  | TET1   | 693_selected_genes |
| chr4  | 106111601 | 106111668 | TET2   | 693_selected_genes |
| chr4  | 106155028 | 106158622 | TET2   | 693_selected_genes |
| chr4  | 106162470 | 106162615 | TET2   | 693_selected_genes |
| chr4  | 106163965 | 106164109 | TET2   | 693_selected_genes |
| chr4  | 106164701 | 106164960 | TET2   | 693_selected_genes |
| chr4  | 106180750 | 106180951 | TET2   | 693_selected_genes |
| chr4  | 106182890 | 106183030 | TET2   | 693_selected_genes |
| chr4  | 106190741 | 106190929 | TET2   | 693_selected_genes |
| chr4  | 106193695 | 106194100 | TET2   | 693_selected_genes |
| chr4  | 106196179 | 106197701 | TET2   | 693_selected_genes |
| chr13 | 114240127 | 114240189 | TFDP1  | 693_selected_genes |
| chr13 | 114265285 | 114265402 | TFDP1  | 693_selected_genes |
| chr13 | 114277469 | 114277626 | TFDP1  | 693_selected_genes |
| chr13 | 114285912 | 114286084 | TFDP1  | 693_selected_genes |
| chr13 | 114287409 | 114287627 | TFDP1  | 693_selected_genes |
| chr13 | 114288179 | 114288373 | TFDP1  | 693_selected_genes |
| chr13 | 114288823 | 114288942 | TFDP1  | 693_selected_genes |
| chr13 | 114290266 | 114290468 | TFDP1  | 693_selected_genes |

|       |           |           |         |                    |
|-------|-----------|-----------|---------|--------------------|
| chr13 | 114290823 | 114291040 | TFDP1   | 693_selected_genes |
| chr13 | 114291909 | 114292236 | TFDP1   | 693_selected_genes |
| chr13 | 114294409 | 114294607 | TFDP1   | 693_selected_genes |
| chr9  | 101867462 | 101867609 | TGFBR1  | 693_selected_genes |
| chr9  | 101890190 | 101890309 | TGFBR1  | 693_selected_genes |
| chr9  | 101891092 | 101891407 | TGFBR1  | 693_selected_genes |
| chr9  | 101894753 | 101895046 | TGFBR1  | 693_selected_genes |
| chr9  | 101900115 | 101900396 | TGFBR1  | 693_selected_genes |
| chr9  | 101904792 | 101905010 | TGFBR1  | 693_selected_genes |
| chr9  | 101906988 | 101907195 | TGFBR1  | 693_selected_genes |
| chr9  | 101908741 | 101908916 | TGFBR1  | 693_selected_genes |
| chr9  | 101909910 | 101910091 | TGFBR1  | 693_selected_genes |
| chr9  | 101911436 | 101911612 | TGFBR1  | 693_selected_genes |
| chr3  | 30648350  | 30648494  | TGFBR2  | 693_selected_genes |
| chr3  | 30664665  | 30664790  | TGFBR2  | 693_selected_genes |
| chr3  | 30686213  | 30686432  | TGFBR2  | 693_selected_genes |
| chr3  | 30691736  | 30691977  | TGFBR2  | 693_selected_genes |
| chr3  | 30713104  | 30713954  | TGFBR2  | 693_selected_genes |
| chr3  | 30715571  | 30715763  | TGFBR2  | 693_selected_genes |
| chr3  | 30729850  | 30730028  | TGFBR2  | 693_selected_genes |
| chr3  | 30732886  | 30733116  | TGFBR2  | 693_selected_genes |
| chr18 | 3447712   | 3447820   | TGIF1   | 693_selected_genes |
| chr18 | 3449604   | 3449679   | TGIF1   | 693_selected_genes |
| chr18 | 3450462   | 3450528   | TGIF1   | 693_selected_genes |
| chr18 | 3451952   | 3452405   | TGIF1   | 693_selected_genes |
| chr18 | 3456326   | 3456759   | TGIF1   | 693_selected_genes |
| chr18 | 3457337   | 3457963   | TGIF1   | 693_selected_genes |
| chr3  | 156395461 | 156396428 | TIPARP  | 693_selected_genes |
| chr3  | 156398929 | 156399003 | TIPARP  | 693_selected_genes |
| chr3  | 156411783 | 156412002 | TIPARP  | 693_selected_genes |
| chr3  | 156413628 | 156413839 | TIPARP  | 693_selected_genes |
| chr3  | 156421187 | 156421516 | TIPARP  | 693_selected_genes |
| chr3  | 156422447 | 156422945 | TIPARP  | 693_selected_genes |
| chr9  | 71789263  | 71789373  | TJP2    | 693_selected_genes |
| chr9  | 71820052  | 71820255  | TJP2    | 693_selected_genes |
| chr9  | 71827438  | 71827542  | TJP2    | 693_selected_genes |
| chr9  | 71831229  | 71831404  | TJP2    | 693_selected_genes |
| chr9  | 71833147  | 71833333  | TJP2    | 693_selected_genes |
| chr9  | 71835777  | 71836437  | TJP2    | 693_selected_genes |
| chr9  | 71840194  | 71840348  | TJP2    | 693_selected_genes |
| chr9  | 71840912  | 71841116  | TJP2    | 693_selected_genes |
| chr9  | 71842655  | 71842814  | TJP2    | 693_selected_genes |
| chr9  | 71842871  | 71843055  | TJP2    | 693_selected_genes |
| chr9  | 71844074  | 71844191  | TJP2    | 693_selected_genes |
| chr9  | 71844972  | 71845173  | TJP2    | 693_selected_genes |
| chr9  | 71849329  | 71849488  | TJP2    | 693_selected_genes |
| chr9  | 71850918  | 71851179  | TJP2    | 693_selected_genes |
| chr9  | 71851839  | 71852077  | TJP2    | 693_selected_genes |
| chr9  | 71852768  | 71852914  | TJP2    | 693_selected_genes |
| chr9  | 71853600  | 71853730  | TJP2    | 693_selected_genes |
| chr9  | 71854827  | 71855088  | TJP2    | 693_selected_genes |
| chr9  | 71861580  | 71861731  | TJP2    | 693_selected_genes |
| chr9  | 71862902  | 71863267  | TJP2    | 693_selected_genes |
| chr9  | 71864265  | 71864426  | TJP2    | 693_selected_genes |
| chr9  | 71865925  | 71866305  | TJP2    | 693_selected_genes |
| chr9  | 71867705  | 71867841  | TJP2    | 693_selected_genes |
| chr9  | 71869099  | 71869315  | TJP2    | 693_selected_genes |
| chr9  | 120466725 | 120466868 | TLR4    | 693_selected_genes |
| chr9  | 120470815 | 120471032 | TLR4    | 693_selected_genes |
| chr9  | 120474641 | 120476951 | TLR4    | 693_selected_genes |
| chr2  | 96919520  | 96919878  | TMEM127 | 693_selected_genes |
| chr2  | 96920545  | 96920760  | TMEM127 | 693_selected_genes |
| chr2  | 96930850  | 96931144  | TMEM127 | 693_selected_genes |
| chr3  | 14166668  | 14166730  | TMEM43  | 693_selected_genes |
| chr3  | 14170329  | 14170568  | TMEM43  | 693_selected_genes |
| chr3  | 14170886  | 14171086  | TMEM43  | 693_selected_genes |
| chr3  | 14172296  | 14172481  | TMEM43  | 693_selected_genes |
| chr3  | 14173054  | 14173199  | TMEM43  | 693_selected_genes |
| chr3  | 14174020  | 14174120  | TMEM43  | 693_selected_genes |
| chr3  | 14174340  | 14174460  | TMEM43  | 693_selected_genes |
| chr3  | 14175213  | 14175334  | TMEM43  | 693_selected_genes |
| chr3  | 14176244  | 14176416  | TMEM43  | 693_selected_genes |
| chr3  | 14176632  | 14176757  | TMEM43  | 693_selected_genes |
| chr3  | 14177281  | 14177433  | TMEM43  | 693_selected_genes |
| chr3  | 14180654  | 14180822  | TMEM43  | 693_selected_genes |
| chr3  | 14183067  | 14183320  | TMEM43  | 693_selected_genes |
| chr21 | 42838043  | 42838105  | TMPRSS2 | 693_selected_genes |
| chr21 | 42839635  | 42839838  | TMPRSS2 | 693_selected_genes |
| chr21 | 42840297  | 42840490  | TMPRSS2 | 693_selected_genes |
| chr21 | 42842549  | 42842695  | TMPRSS2 | 693_selected_genes |
| chr21 | 42843707  | 42843933  | TMPRSS2 | 693_selected_genes |
| chr21 | 42845226  | 42845448  | TMPRSS2 | 693_selected_genes |
| chr21 | 42848478  | 42848572  | TMPRSS2 | 693_selected_genes |
| chr21 | 42851073  | 42851234  | TMPRSS2 | 693_selected_genes |

|       |           |           |          |                    |
|-------|-----------|-----------|----------|--------------------|
| chr21 | 42852377  | 42852554  | TMPRSS2  | 693_selected_genes |
| chr21 | 42860295  | 42860465  | TMPRSS2  | 693_selected_genes |
| chr21 | 42861408  | 42861545  | TMPRSS2  | 693_selected_genes |
| chr21 | 42866257  | 42866530  | TMPRSS2  | 693_selected_genes |
| chr21 | 42870020  | 42870141  | TMPRSS2  | 693_selected_genes |
| chr21 | 42879851  | 42879956  | TMPRSS2  | 693_selected_genes |
| chr6  | 31543493  | 31543729  | TNF      | 693_selected_genes |
| chr6  | 31544285  | 31544381  | TNF      | 693_selected_genes |
| chr6  | 31544518  | 31544616  | TNF      | 693_selected_genes |
| chr6  | 31544867  | 31545339  | TNF      | 693_selected_genes |
| chr6  | 138192339 | 138192684 | TNFAIP3  | 693_selected_genes |
| chr6  | 138195956 | 138196197 | TNFAIP3  | 693_selected_genes |
| chr6  | 138196799 | 138196997 | TNFAIP3  | 693_selected_genes |
| chr6  | 138197107 | 138197328 | TNFAIP3  | 693_selected_genes |
| chr6  | 138198187 | 138198418 | TNFAIP3  | 693_selected_genes |
| chr6  | 138199543 | 138200513 | TNFAIP3  | 693_selected_genes |
| chr6  | 138201182 | 138201414 | TNFAIP3  | 693_selected_genes |
| chr6  | 138202146 | 138202481 | TNFAIP3  | 693_selected_genes |
| chr1  | 2488078   | 2488197   | TNFRSF14 | 693_selected_genes |
| chr1  | 2489139   | 2489298   | TNFRSF14 | 693_selected_genes |
| chr1  | 2489756   | 2489932   | TNFRSF14 | 693_selected_genes |
| chr1  | 2491236   | 2491442   | TNFRSF14 | 693_selected_genes |
| chr1  | 2492037   | 2492178   | TNFRSF14 | 693_selected_genes |
| chr1  | 2492907   | 2492988   | TNFRSF14 | 693_selected_genes |
| chr1  | 2493086   | 2493279   | TNFRSF14 | 693_selected_genes |
| chr1  | 2494278   | 2494360   | TNFRSF14 | 693_selected_genes |
| chr1  | 2494561   | 2494737   | TNFRSF14 | 693_selected_genes |
| chr19 | 55663176  | 55663310  | TNNI3    | 693_selected_genes |
| chr19 | 55665372  | 55665599  | TNNI3    | 693_selected_genes |
| chr19 | 55666083  | 55666223  | TNNI3    | 693_selected_genes |
| chr19 | 55667543  | 55667763  | TNNI3    | 693_selected_genes |
| chr19 | 55667945  | 55668070  | TNNI3    | 693_selected_genes |
| chr19 | 55668392  | 55668527  | TNNI3    | 693_selected_genes |
| chr19 | 55668638  | 55668701  | TNNI3    | 693_selected_genes |
| chr19 | 55668910  | 55668982  | TNNI3    | 693_selected_genes |
| chr1  | 201328312 | 201328408 | TNNT2    | 693_selected_genes |
| chr1  | 201328725 | 201328816 | TNNT2    | 693_selected_genes |
| chr1  | 201330381 | 201330522 | TNNT2    | 693_selected_genes |
| chr1  | 201331015 | 201331187 | TNNT2    | 693_selected_genes |
| chr1  | 201331212 | 201331268 | TNNT2    | 693_selected_genes |
| chr1  | 201331488 | 201331547 | TNNT2    | 693_selected_genes |
| chr1  | 201332397 | 201332559 | TNNT2    | 693_selected_genes |
| chr1  | 201333400 | 201333528 | TNNT2    | 693_selected_genes |
| chr1  | 201334293 | 201334460 | TNNT2    | 693_selected_genes |
| chr1  | 201334712 | 201334823 | TNNT2    | 693_selected_genes |
| chr1  | 201335940 | 201336024 | TNNT2    | 693_selected_genes |
| chr1  | 201336873 | 201336959 | TNNT2    | 693_selected_genes |
| chr1  | 201337264 | 201337380 | TNNT2    | 693_selected_genes |
| chr1  | 201337520 | 201337581 | TNNT2    | 693_selected_genes |
| chr1  | 201338435 | 201338495 | TNNT2    | 693_selected_genes |
| chr1  | 201338918 | 201338999 | TNNT2    | 693_selected_genes |
| chr1  | 201341129 | 201341198 | TNNT2    | 693_selected_genes |
| chr1  | 201341247 | 201341308 | TNNT2    | 693_selected_genes |
| chr1  | 201342186 | 201342246 | TNNT2    | 693_selected_genes |
| chr1  | 201342299 | 201342407 | TNNT2    | 693_selected_genes |
| chr5  | 72112539  | 72112604  | TNPO1    | 693_selected_genes |
| chr5  | 72144186  | 72144350  | TNPO1    | 693_selected_genes |
| chr5  | 72147045  | 72147171  | TNPO1    | 693_selected_genes |
| chr5  | 72151575  | 72151775  | TNPO1    | 693_selected_genes |
| chr5  | 72157609  | 72157766  | TNPO1    | 693_selected_genes |
| chr5  | 72161397  | 72161581  | TNPO1    | 693_selected_genes |
| chr5  | 72168440  | 72168572  | TNPO1    | 693_selected_genes |
| chr5  | 72171416  | 72171589  | TNPO1    | 693_selected_genes |
| chr5  | 72173029  | 72173198  | TNPO1    | 693_selected_genes |
| chr5  | 72178268  | 72178379  | TNPO1    | 693_selected_genes |
| chr5  | 72178865  | 72179084  | TNPO1    | 693_selected_genes |
| chr5  | 72182871  | 72183074  | TNPO1    | 693_selected_genes |
| chr5  | 72183879  | 72184155  | TNPO1    | 693_selected_genes |
| chr5  | 72185587  | 72185809  | TNPO1    | 693_selected_genes |
| chr5  | 72187611  | 72187748  | TNPO1    | 693_selected_genes |
| chr5  | 72188940  | 72189098  | TNPO1    | 693_selected_genes |
| chr5  | 72189178  | 72189387  | TNPO1    | 693_selected_genes |
| chr5  | 72189417  | 72189555  | TNPO1    | 693_selected_genes |
| chr5  | 72192259  | 72192408  | TNPO1    | 693_selected_genes |
| chr5  | 72192857  | 72193003  | TNPO1    | 693_selected_genes |
| chr5  | 72195807  | 72195933  | TNPO1    | 693_selected_genes |
| chr5  | 72196775  | 72196925  | TNPO1    | 693_selected_genes |
| chr5  | 72199510  | 72199635  | TNPO1    | 693_selected_genes |
| chr5  | 72201104  | 72201262  | TNPO1    | 693_selected_genes |
| chr5  | 72204661  | 72204792  | TNPO1    | 693_selected_genes |
| chr22 | 35695896  | 35695998  | TOM1     | 693_selected_genes |
| chr22 | 35713844  | 35713979  | TOM1     | 693_selected_genes |
| chr22 | 35717709  | 35717832  | TOM1     | 693_selected_genes |
| chr22 | 35717926  | 35718055  | TOM1     | 693_selected_genes |

|       |          |          |         |                    |
|-------|----------|----------|---------|--------------------|
| chr22 | 35718966 | 35719195 | TOM1    | 693_selected_genes |
| chr22 | 35719463 | 35719648 | TOM1    | 693_selected_genes |
| chr22 | 35719735 | 35719932 | TOM1    | 693_selected_genes |
| chr22 | 35723238 | 35723405 | TOM1    | 693_selected_genes |
| chr22 | 35726314 | 35726498 | TOM1    | 693_selected_genes |
| chr22 | 35727263 | 35727413 | TOM1    | 693_selected_genes |
| chr22 | 35728948 | 35729032 | TOM1    | 693_selected_genes |
| chr22 | 35729371 | 35729515 | TOM1    | 693_selected_genes |
| chr22 | 35730295 | 35730466 | TOM1    | 693_selected_genes |
| chr22 | 35734680 | 35734806 | TOM1    | 693_selected_genes |
| chr22 | 35741692 | 35741802 | TOM1    | 693_selected_genes |
| chr22 | 35742897 | 35742990 | TOM1    | 693_selected_genes |
| chr22 | 35743022 | 35743227 | TOM1    | 693_selected_genes |
| chr20 | 39657682 | 39657765 | TOP1    | 693_selected_genes |
| chr20 | 39658045 | 39658120 | TOP1    | 693_selected_genes |
| chr20 | 39690008 | 39690155 | TOP1    | 693_selected_genes |
| chr20 | 39704785 | 39704959 | TOP1    | 693_selected_genes |
| chr20 | 39706196 | 39706302 | TOP1    | 693_selected_genes |
| chr20 | 39708699 | 39708845 | TOP1    | 693_selected_genes |
| chr20 | 39709779 | 39709905 | TOP1    | 693_selected_genes |
| chr20 | 39713076 | 39713233 | TOP1    | 693_selected_genes |
| chr20 | 39721086 | 39721252 | TOP1    | 693_selected_genes |
| chr20 | 39725834 | 39726006 | TOP1    | 693_selected_genes |
| chr20 | 39726829 | 39727002 | TOP1    | 693_selected_genes |
| chr20 | 39728670 | 39728908 | TOP1    | 693_selected_genes |
| chr20 | 39729823 | 39730018 | TOP1    | 693_selected_genes |
| chr20 | 39741396 | 39741590 | TOP1    | 693_selected_genes |
| chr20 | 39742584 | 39742820 | TOP1    | 693_selected_genes |
| chr20 | 39743985 | 39744104 | TOP1    | 693_selected_genes |
| chr20 | 39744892 | 39745057 | TOP1    | 693_selected_genes |
| chr20 | 39746783 | 39746961 | TOP1    | 693_selected_genes |
| chr20 | 39750310 | 39750455 | TOP1    | 693_selected_genes |
| chr20 | 39750620 | 39750820 | TOP1    | 693_selected_genes |
| chr20 | 39751809 | 39751962 | TOP1    | 693_selected_genes |
| chr17 | 38545745 | 38545924 | TOP2A   | 693_selected_genes |
| chr17 | 38546191 | 38546441 | TOP2A   | 693_selected_genes |
| chr17 | 38547732 | 38547917 | TOP2A   | 693_selected_genes |
| chr17 | 38548294 | 38548388 | TOP2A   | 693_selected_genes |
| chr17 | 38548444 | 38548618 | TOP2A   | 693_selected_genes |
| chr17 | 38548811 | 38549014 | TOP2A   | 693_selected_genes |
| chr17 | 38551675 | 38551816 | TOP2A   | 693_selected_genes |
| chr17 | 38552509 | 38552742 | TOP2A   | 693_selected_genes |
| chr17 | 38554784 | 38554918 | TOP2A   | 693_selected_genes |
| chr17 | 38554999 | 38555214 | TOP2A   | 693_selected_genes |
| chr17 | 38555266 | 38555408 | TOP2A   | 693_selected_genes |
| chr17 | 38556098 | 38556344 | TOP2A   | 693_selected_genes |
| chr17 | 38556435 | 38556686 | TOP2A   | 693_selected_genes |
| chr17 | 38556755 | 38556940 | TOP2A   | 693_selected_genes |
| chr17 | 38557076 | 38557358 | TOP2A   | 693_selected_genes |
| chr17 | 38559132 | 38559331 | TOP2A   | 693_selected_genes |
| chr17 | 38560378 | 38560550 | TOP2A   | 693_selected_genes |
| chr17 | 38560603 | 38560768 | TOP2A   | 693_selected_genes |
| chr17 | 38561017 | 38561160 | TOP2A   | 693_selected_genes |
| chr17 | 38562610 | 38562770 | TOP2A   | 693_selected_genes |
| chr17 | 38562810 | 38562966 | TOP2A   | 693_selected_genes |
| chr17 | 38563058 | 38563219 | TOP2A   | 693_selected_genes |
| chr17 | 38563775 | 38563951 | TOP2A   | 693_selected_genes |
| chr17 | 38564193 | 38564401 | TOP2A   | 693_selected_genes |
| chr17 | 38564718 | 38564907 | TOP2A   | 693_selected_genes |
| chr17 | 38567335 | 38567523 | TOP2A   | 693_selected_genes |
| chr17 | 38567580 | 38567732 | TOP2A   | 693_selected_genes |
| chr17 | 38567871 | 38568095 | TOP2A   | 693_selected_genes |
| chr17 | 38568985 | 38569248 | TOP2A   | 693_selected_genes |
| chr17 | 38569421 | 38569569 | TOP2A   | 693_selected_genes |
| chr17 | 38569706 | 38569902 | TOP2A   | 693_selected_genes |
| chr17 | 38572231 | 38572345 | TOP2A   | 693_selected_genes |
| chr17 | 38572648 | 38572789 | TOP2A   | 693_selected_genes |
| chr17 | 38572966 | 38573172 | TOP2A   | 693_selected_genes |
| chr17 | 38573997 | 38574068 | TOP2A   | 693_selected_genes |
| chr17 | 7565231  | 7565357  | TP53    | 693_selected_genes |
| chr17 | 7569498  | 7569587  | TP53    | 693_selected_genes |
| chr17 | 7572901  | 7573033  | TP53    | 693_selected_genes |
| chr17 | 7573901  | 7574058  | TP53    | 693_selected_genes |
| chr17 | 7576511  | 7576682  | TP53    | 693_selected_genes |
| chr17 | 7576827  | 7576951  | TP53    | 693_selected_genes |
| chr17 | 7576993  | 7577180  | TP53    | 693_selected_genes |
| chr17 | 7577473  | 7577633  | TP53    | 693_selected_genes |
| chr17 | 7578151  | 7578314  | TP53    | 693_selected_genes |
| chr17 | 7578345  | 7578579  | TP53    | 693_selected_genes |
| chr17 | 7579286  | 7579615  | TP53    | 693_selected_genes |
| chr17 | 7579674  | 7579746  | TP53    | 693_selected_genes |
| chr17 | 7579813  | 7579937  | TP53    | 693_selected_genes |
| chr15 | 43699555 | 43699793 | TP53BP1 | 693_selected_genes |
| chr15 | 43700115 | 43700311 | TP53BP1 | 693_selected_genes |

|       |           |           |         |                    |
|-------|-----------|-----------|---------|--------------------|
| chr15 | 43701069  | 43701319  | TP53BP1 | 693_selected_genes |
| chr15 | 43701819  | 43701964  | TP53BP1 | 693_selected_genes |
| chr15 | 43704844  | 43704990  | TP53BP1 | 693_selected_genes |
| chr15 | 43705291  | 43705557  | TP53BP1 | 693_selected_genes |
| chr15 | 43706275  | 43706339  | TP53BP1 | 693_selected_genes |
| chr15 | 43707766  | 43708032  | TP53BP1 | 693_selected_genes |
| chr15 | 43708397  | 43708639  | TP53BP1 | 693_selected_genes |
| chr15 | 43712477  | 43712958  | TP53BP1 | 693_selected_genes |
| chr15 | 43713197  | 43713397  | TP53BP1 | 693_selected_genes |
| chr15 | 43713966  | 43714349  | TP53BP1 | 693_selected_genes |
| chr15 | 43720188  | 43720391  | TP53BP1 | 693_selected_genes |
| chr15 | 43724366  | 43724900  | TP53BP1 | 693_selected_genes |
| chr15 | 43730496  | 43730639  | TP53BP1 | 693_selected_genes |
| chr15 | 43733698  | 43733806  | TP53BP1 | 693_selected_genes |
| chr15 | 43738559  | 43738813  | TP53BP1 | 693_selected_genes |
| chr15 | 43739070  | 43739137  | TP53BP1 | 693_selected_genes |
| chr15 | 43739530  | 43739708  | TP53BP1 | 693_selected_genes |
| chr15 | 43748064  | 43749441  | TP53BP1 | 693_selected_genes |
| chr15 | 43762030  | 43762289  | TP53BP1 | 693_selected_genes |
| chr15 | 43766845  | 43766990  | TP53BP1 | 693_selected_genes |
| chr15 | 43767737  | 43767917  | TP53BP1 | 693_selected_genes |
| chr15 | 43769765  | 43769982  | TP53BP1 | 693_selected_genes |
| chr15 | 43771569  | 43771749  | TP53BP1 | 693_selected_genes |
| chr15 | 43772031  | 43772240  | TP53BP1 | 693_selected_genes |
| chr15 | 43773067  | 43773245  | TP53BP1 | 693_selected_genes |
| chr15 | 43783841  | 43783976  | TP53BP1 | 693_selected_genes |
| chr15 | 43784174  | 43784318  | TP53BP1 | 693_selected_genes |
| chr15 | 43784456  | 43784691  | TP53BP1 | 693_selected_genes |
| chr15 | 43785209  | 43785266  | TP53BP1 | 693_selected_genes |
| chr3  | 189349279 | 189349391 | TP63    | 693_selected_genes |
| chr3  | 189455503 | 189455682 | TP63    | 693_selected_genes |
| chr3  | 189456405 | 189456588 | TP63    | 693_selected_genes |
| chr3  | 189507564 | 189507656 | TP63    | 693_selected_genes |
| chr3  | 189526035 | 189526340 | TP63    | 693_selected_genes |
| chr3  | 189561960 | 189562226 | TP63    | 693_selected_genes |
| chr3  | 189581995 | 189582232 | TP63    | 693_selected_genes |
| chr3  | 189584445 | 189584611 | TP63    | 693_selected_genes |
| chr3  | 189585596 | 189585756 | TP63    | 693_selected_genes |
| chr3  | 189586343 | 189586530 | TP63    | 693_selected_genes |
| chr3  | 189587087 | 189587220 | TP63    | 693_selected_genes |
| chr3  | 189590622 | 189590809 | TP63    | 693_selected_genes |
| chr3  | 189597827 | 189597992 | TP63    | 693_selected_genes |
| chr3  | 189604157 | 189604365 | TP63    | 693_selected_genes |
| chr3  | 189607103 | 189607298 | TP63    | 693_selected_genes |
| chr3  | 189608552 | 189608696 | TP63    | 693_selected_genes |
| chr3  | 189611969 | 189612316 | TP63    | 693_selected_genes |
| chr6  | 18130873  | 18131036  | TPMT    | 693_selected_genes |
| chr6  | 18132338  | 18132433  | TPMT    | 693_selected_genes |
| chr6  | 18134009  | 18134145  | TPMT    | 693_selected_genes |
| chr6  | 18139168  | 18139293  | TPMT    | 693_selected_genes |
| chr6  | 18139870  | 18139973  | TPMT    | 693_selected_genes |
| chr6  | 18143801  | 18143984  | TPMT    | 693_selected_genes |
| chr6  | 18148028  | 18148171  | TPMT    | 693_selected_genes |
| chr6  | 18149193  | 18149383  | TPMT    | 693_selected_genes |
| chr20 | 30345254  | 30345410  | TPX2    | 693_selected_genes |
| chr20 | 30347834  | 30348007  | TPX2    | 693_selected_genes |
| chr20 | 30354333  | 30354510  | TPX2    | 693_selected_genes |
| chr20 | 30358120  | 30358299  | TPX2    | 693_selected_genes |
| chr20 | 30359337  | 30359510  | TPX2    | 693_selected_genes |
| chr20 | 30363644  | 30363816  | TPX2    | 693_selected_genes |
| chr20 | 30365264  | 30365466  | TPX2    | 693_selected_genes |
| chr20 | 30366590  | 30366812  | TPX2    | 693_selected_genes |
| chr20 | 30368716  | 30368874  | TPX2    | 693_selected_genes |
| chr20 | 30370026  | 30370218  | TPX2    | 693_selected_genes |
| chr20 | 30371482  | 30371749  | TPX2    | 693_selected_genes |
| chr20 | 30380512  | 30380658  | TPX2    | 693_selected_genes |
| chr20 | 30381625  | 30381852  | TPX2    | 693_selected_genes |
| chr20 | 30382179  | 30382376  | TPX2    | 693_selected_genes |
| chr20 | 30385181  | 30385343  | TPX2    | 693_selected_genes |
| chr20 | 30386142  | 30386380  | TPX2    | 693_selected_genes |
| chr20 | 30388747  | 30388908  | TPX2    | 693_selected_genes |
| chr14 | 103336513 | 103336808 | TRAF3   | 693_selected_genes |
| chr14 | 103338228 | 103338330 | TRAF3   | 693_selected_genes |
| chr14 | 103341935 | 103342090 | TRAF3   | 693_selected_genes |
| chr14 | 103342669 | 103342887 | TRAF3   | 693_selected_genes |
| chr14 | 103352500 | 103352631 | TRAF3   | 693_selected_genes |
| chr14 | 103355871 | 103355996 | TRAF3   | 693_selected_genes |
| chr14 | 103357636 | 103357779 | TRAF3   | 693_selected_genes |
| chr14 | 103361384 | 103361494 | TRAF3   | 693_selected_genes |
| chr14 | 103363572 | 103363763 | TRAF3   | 693_selected_genes |
| chr14 | 103369566 | 103369791 | TRAF3   | 693_selected_genes |
| chr14 | 103371524 | 103372146 | TRAF3   | 693_selected_genes |
| chr16 | 2213896   | 2214027   | TRAF7   | 693_selected_genes |
| chr16 | 2215832   | 2215962   | TRAF7   | 693_selected_genes |

|       |          |          |       |                    |
|-------|----------|----------|-------|--------------------|
| chr16 | 2218052  | 2218194  | TRAF7 | 693_selected_genes |
| chr16 | 2220589  | 2220756  | TRAF7 | 693_selected_genes |
| chr16 | 2221239  | 2221382  | TRAF7 | 693_selected_genes |
| chr16 | 2221547  | 2221631  | TRAF7 | 693_selected_genes |
| chr16 | 2222166  | 2222400  | TRAF7 | 693_selected_genes |
| chr16 | 2222440  | 2222625  | TRAF7 | 693_selected_genes |
| chr16 | 2223157  | 2223425  | TRAF7 | 693_selected_genes |
| chr16 | 2223456  | 2223580  | TRAF7 | 693_selected_genes |
| chr16 | 2223763  | 2223862  | TRAF7 | 693_selected_genes |
| chr16 | 2223896  | 2224074  | TRAF7 | 693_selected_genes |
| chr16 | 2224226  | 2224359  | TRAF7 | 693_selected_genes |
| chr16 | 2225086  | 2225176  | TRAF7 | 693_selected_genes |
| chr16 | 2225276  | 2225443  | TRAF7 | 693_selected_genes |
| chr16 | 2225475  | 2225648  | TRAF7 | 693_selected_genes |
| chr16 | 2225809  | 2225979  | TRAF7 | 693_selected_genes |
| chr16 | 2226024  | 2226206  | TRAF7 | 693_selected_genes |
| chr16 | 2226240  | 2226410  | TRAF7 | 693_selected_genes |
| chr16 | 2226535  | 2226600  | TRAF7 | 693_selected_genes |
| chr5  | 14143809 | 14144016 | TRIO  | 693_selected_genes |
| chr5  | 14184033 | 14184093 | TRIO  | 693_selected_genes |
| chr5  | 14270908 | 14271033 | TRIO  | 693_selected_genes |
| chr5  | 14280405 | 14280570 | TRIO  | 693_selected_genes |
| chr5  | 14286954 | 14287197 | TRIO  | 693_selected_genes |
| chr5  | 14290799 | 14291362 | TRIO  | 693_selected_genes |
| chr5  | 14293095 | 14293268 | TRIO  | 693_selected_genes |
| chr5  | 14297155 | 14297397 | TRIO  | 693_selected_genes |
| chr5  | 14304544 | 14304726 | TRIO  | 693_selected_genes |
| chr5  | 14316596 | 14316877 | TRIO  | 693_selected_genes |
| chr5  | 14330861 | 14331034 | TRIO  | 693_selected_genes |
| chr5  | 14336619 | 14336861 | TRIO  | 693_selected_genes |
| chr5  | 14358261 | 14358481 | TRIO  | 693_selected_genes |
| chr5  | 14359440 | 14359665 | TRIO  | 693_selected_genes |
| chr5  | 14363815 | 14364061 | TRIO  | 693_selected_genes |
| chr5  | 14364733 | 14364950 | TRIO  | 693_selected_genes |
| chr5  | 14366943 | 14367113 | TRIO  | 693_selected_genes |
| chr5  | 14368791 | 14369033 | TRIO  | 693_selected_genes |
| chr5  | 14369457 | 14369657 | TRIO  | 693_selected_genes |
| chr5  | 14374312 | 14374477 | TRIO  | 693_selected_genes |
| chr5  | 14378095 | 14378261 | TRIO  | 693_selected_genes |
| chr5  | 14381213 | 14381386 | TRIO  | 693_selected_genes |
| chr5  | 14387521 | 14387766 | TRIO  | 693_selected_genes |
| chr5  | 14387815 | 14387981 | TRIO  | 693_selected_genes |
| chr5  | 14388696 | 14388813 | TRIO  | 693_selected_genes |
| chr5  | 14389372 | 14389532 | TRIO  | 693_selected_genes |
| chr5  | 14390314 | 14390434 | TRIO  | 693_selected_genes |
| chr5  | 14390984 | 14391124 | TRIO  | 693_selected_genes |
| chr5  | 14394121 | 14394264 | TRIO  | 693_selected_genes |
| chr5  | 14397126 | 14397288 | TRIO  | 693_selected_genes |
| chr5  | 14398963 | 14399264 | TRIO  | 693_selected_genes |
| chr5  | 14401046 | 14401198 | TRIO  | 693_selected_genes |
| chr5  | 14405931 | 14406124 | TRIO  | 693_selected_genes |
| chr5  | 14406656 | 14406806 | TRIO  | 693_selected_genes |
| chr5  | 14419861 | 14420155 | TRIO  | 693_selected_genes |
| chr5  | 14461102 | 14461445 | TRIO  | 693_selected_genes |
| chr5  | 14462838 | 14463059 | TRIO  | 693_selected_genes |
| chr5  | 14465628 | 14465774 | TRIO  | 693_selected_genes |
| chr5  | 14471401 | 14471600 | TRIO  | 693_selected_genes |
| chr5  | 14472675 | 14472792 | TRIO  | 693_selected_genes |
| chr5  | 14474077 | 14474231 | TRIO  | 693_selected_genes |
| chr5  | 14476977 | 14477097 | TRIO  | 693_selected_genes |
| chr5  | 14479344 | 14479484 | TRIO  | 693_selected_genes |
| chr5  | 14480002 | 14480145 | TRIO  | 693_selected_genes |
| chr5  | 14481317 | 14481418 | TRIO  | 693_selected_genes |
| chr5  | 14481624 | 14481752 | TRIO  | 693_selected_genes |
| chr5  | 14482665 | 14482907 | TRIO  | 693_selected_genes |
| chr5  | 14485152 | 14485380 | TRIO  | 693_selected_genes |
| chr5  | 14487547 | 14488394 | TRIO  | 693_selected_genes |
| chr5  | 14489024 | 14489203 | TRIO  | 693_selected_genes |
| chr5  | 14490902 | 14490954 | TRIO  | 693_selected_genes |
| chr5  | 14492650 | 14492948 | TRIO  | 693_selected_genes |
| chr5  | 14496962 | 14497151 | TRIO  | 693_selected_genes |
| chr5  | 14497930 | 14498008 | TRIO  | 693_selected_genes |
| chr5  | 14498172 | 14498385 | TRIO  | 693_selected_genes |
| chr5  | 14498602 | 14498774 | TRIO  | 693_selected_genes |
| chr5  | 14502662 | 14502791 | TRIO  | 693_selected_genes |
| chr5  | 14504476 | 14504727 | TRIO  | 693_selected_genes |
| chr5  | 14507205 | 14507394 | TRIO  | 693_selected_genes |
| chr5  | 14507963 | 14508556 | TRIO  | 693_selected_genes |
| chr5  | 14531827 | 14531908 | TRIO  | 693_selected_genes |
| chr7  | 98478748 | 98478898 | TRRAP | 693_selected_genes |
| chr7  | 98479572 | 98479672 | TRRAP | 693_selected_genes |
| chr7  | 98487932 | 98488093 | TRRAP | 693_selected_genes |
| chr7  | 98490021 | 98490176 | TRRAP | 693_selected_genes |
| chr7  | 98491395 | 98491529 | TRRAP | 693_selected_genes |

|      |           |           |       |                    |
|------|-----------|-----------|-------|--------------------|
| chr7 | 98493361  | 98493468  | TRRAP | 693_selected_genes |
| chr7 | 98495338  | 98495514  | TRRAP | 693_selected_genes |
| chr7 | 98497019  | 98497147  | TRRAP | 693_selected_genes |
| chr7 | 98497276  | 98497415  | TRRAP | 693_selected_genes |
| chr7 | 98498221  | 98498368  | TRRAP | 693_selected_genes |
| chr7 | 98500976  | 98501165  | TRRAP | 693_selected_genes |
| chr7 | 98503774  | 98503903  | TRRAP | 693_selected_genes |
| chr7 | 98506325  | 98506610  | TRRAP | 693_selected_genes |
| chr7 | 98507653  | 98508067  | TRRAP | 693_selected_genes |
| chr7 | 98508107  | 98508255  | TRRAP | 693_selected_genes |
| chr7 | 98508674  | 98508919  | TRRAP | 693_selected_genes |
| chr7 | 98509619  | 98509861  | TRRAP | 693_selected_genes |
| chr7 | 98513320  | 98513536  | TRRAP | 693_selected_genes |
| chr7 | 98515020  | 98515327  | TRRAP | 693_selected_genes |
| chr7 | 98519350  | 98519601  | TRRAP | 693_selected_genes |
| chr7 | 98522709  | 98522911  | TRRAP | 693_selected_genes |
| chr7 | 98524764  | 98525014  | TRRAP | 693_selected_genes |
| chr7 | 98527586  | 98527854  | TRRAP | 693_selected_genes |
| chr7 | 98528230  | 98528478  | TRRAP | 693_selected_genes |
| chr7 | 98529002  | 98529313  | TRRAP | 693_selected_genes |
| chr7 | 98530838  | 98531050  | TRRAP | 693_selected_genes |
| chr7 | 98533176  | 98533323  | TRRAP | 693_selected_genes |
| chr7 | 98534753  | 98534925  | TRRAP | 693_selected_genes |
| chr7 | 98535247  | 98535468  | TRRAP | 693_selected_genes |
| chr7 | 98540546  | 98540665  | TRRAP | 693_selected_genes |
| chr7 | 98543344  | 98543448  | TRRAP | 693_selected_genes |
| chr7 | 98543527  | 98543598  | TRRAP | 693_selected_genes |
| chr7 | 98545818  | 98545988  | TRRAP | 693_selected_genes |
| chr7 | 98546163  | 98546333  | TRRAP | 693_selected_genes |
| chr7 | 98547014  | 98547229  | TRRAP | 693_selected_genes |
| chr7 | 98547257  | 98547489  | TRRAP | 693_selected_genes |
| chr7 | 98547661  | 98547910  | TRRAP | 693_selected_genes |
| chr7 | 98548473  | 98548652  | TRRAP | 693_selected_genes |
| chr7 | 98550764  | 98551081  | TRRAP | 693_selected_genes |
| chr7 | 98552695  | 98552952  | TRRAP | 693_selected_genes |
| chr7 | 98553743  | 98553952  | TRRAP | 693_selected_genes |
| chr7 | 98553996  | 98554181  | TRRAP | 693_selected_genes |
| chr7 | 98555578  | 98555739  | TRRAP | 693_selected_genes |
| chr7 | 98556941  | 98557138  | TRRAP | 693_selected_genes |
| chr7 | 98558858  | 98559122  | TRRAP | 693_selected_genes |
| chr7 | 98559899  | 98560075  | TRRAP | 693_selected_genes |
| chr7 | 98562226  | 98562423  | TRRAP | 693_selected_genes |
| chr7 | 98563290  | 98563543  | TRRAP | 693_selected_genes |
| chr7 | 98564638  | 98564810  | TRRAP | 693_selected_genes |
| chr7 | 98565082  | 98565346  | TRRAP | 693_selected_genes |
| chr7 | 98567709  | 98567939  | TRRAP | 693_selected_genes |
| chr7 | 98569396  | 98569593  | TRRAP | 693_selected_genes |
| chr7 | 98573746  | 98573916  | TRRAP | 693_selected_genes |
| chr7 | 98574080  | 98574418  | TRRAP | 693_selected_genes |
| chr7 | 98574536  | 98574724  | TRRAP | 693_selected_genes |
| chr7 | 98575808  | 98575971  | TRRAP | 693_selected_genes |
| chr7 | 98576366  | 98576552  | TRRAP | 693_selected_genes |
| chr7 | 98579366  | 98579608  | TRRAP | 693_selected_genes |
| chr7 | 98580861  | 98581140  | TRRAP | 693_selected_genes |
| chr7 | 98581690  | 98582006  | TRRAP | 693_selected_genes |
| chr7 | 98582541  | 98582692  | TRRAP | 693_selected_genes |
| chr7 | 98586362  | 98586614  | TRRAP | 693_selected_genes |
| chr7 | 98588052  | 98588267  | TRRAP | 693_selected_genes |
| chr7 | 98589734  | 98589875  | TRRAP | 693_selected_genes |
| chr7 | 98591135  | 98591385  | TRRAP | 693_selected_genes |
| chr7 | 98592184  | 98592496  | TRRAP | 693_selected_genes |
| chr7 | 98601787  | 98602063  | TRRAP | 693_selected_genes |
| chr7 | 98602728  | 98602996  | TRRAP | 693_selected_genes |
| chr7 | 98605974  | 98606209  | TRRAP | 693_selected_genes |
| chr7 | 98608649  | 98608903  | TRRAP | 693_selected_genes |
| chr7 | 98608938  | 98609183  | TRRAP | 693_selected_genes |
| chr7 | 98609668  | 98610003  | TRRAP | 693_selected_genes |
| chr9 | 135771596 | 135772166 | TSC1  | 693_selected_genes |
| chr9 | 135772545 | 135772757 | TSC1  | 693_selected_genes |
| chr9 | 135772784 | 135773022 | TSC1  | 693_selected_genes |
| chr9 | 135776076 | 135776249 | TSC1  | 693_selected_genes |
| chr9 | 135776950 | 135777111 | TSC1  | 693_selected_genes |
| chr9 | 135777966 | 135778199 | TSC1  | 693_selected_genes |
| chr9 | 135779012 | 135779229 | TSC1  | 693_selected_genes |
| chr9 | 135779772 | 135779866 | TSC1  | 693_selected_genes |
| chr9 | 135780942 | 135781551 | TSC1  | 693_selected_genes |
| chr9 | 135782092 | 135782247 | TSC1  | 693_selected_genes |
| chr9 | 135782662 | 135782782 | TSC1  | 693_selected_genes |
| chr9 | 135785932 | 135786104 | TSC1  | 693_selected_genes |
| chr9 | 135786363 | 135786525 | TSC1  | 693_selected_genes |
| chr9 | 135786742 | 135786980 | TSC1  | 693_selected_genes |
| chr9 | 135787643 | 135787869 | TSC1  | 693_selected_genes |
| chr9 | 135796724 | 135796848 | TSC1  | 693_selected_genes |
| chr9 | 135797180 | 135797385 | TSC1  | 693_selected_genes |

|       |           |           |       |                    |
|-------|-----------|-----------|-------|--------------------|
| chr9  | 135798709 | 135798904 | TSC1  | 693_selected_genes |
| chr9  | 135800948 | 135801151 | TSC1  | 693_selected_genes |
| chr9  | 135802562 | 135802716 | TSC1  | 693_selected_genes |
| chr9  | 135804128 | 135804284 | TSC1  | 693_selected_genes |
| chr16 | 2098245   | 2098299   | TSC2  | 693_selected_genes |
| chr16 | 2098562   | 2098779   | TSC2  | 693_selected_genes |
| chr16 | 2100375   | 2100512   | TSC2  | 693_selected_genes |
| chr16 | 2103317   | 2103568   | TSC2  | 693_selected_genes |
| chr16 | 2104271   | 2104466   | TSC2  | 693_selected_genes |
| chr16 | 2105377   | 2105546   | TSC2  | 693_selected_genes |
| chr16 | 2106136   | 2106270   | TSC2  | 693_selected_genes |
| chr16 | 2106619   | 2106795   | TSC2  | 693_selected_genes |
| chr16 | 2107080   | 2107204   | TSC2  | 693_selected_genes |
| chr16 | 2108722   | 2108899   | TSC2  | 693_selected_genes |
| chr16 | 2110645   | 2110839   | TSC2  | 693_selected_genes |
| chr16 | 2111846   | 2112034   | TSC2  | 693_selected_genes |
| chr16 | 2112472   | 2112626   | TSC2  | 693_selected_genes |
| chr16 | 2112947   | 2113079   | TSC2  | 693_selected_genes |
| chr16 | 2114247   | 2114453   | TSC2  | 693_selected_genes |
| chr16 | 2115494   | 2115661   | TSC2  | 693_selected_genes |
| chr16 | 2120431   | 2120604   | TSC2  | 693_selected_genes |
| chr16 | 2121485   | 2121642   | TSC2  | 693_selected_genes |
| chr16 | 2121759   | 2121960   | TSC2  | 693_selected_genes |
| chr16 | 2122216   | 2122389   | TSC2  | 693_selected_genes |
| chr16 | 2122824   | 2123009   | TSC2  | 693_selected_genes |
| chr16 | 2124175   | 2124415   | TSC2  | 693_selected_genes |
| chr16 | 2125774   | 2125918   | TSC2  | 693_selected_genes |
| chr16 | 2126043   | 2126280   | TSC2  | 693_selected_genes |
| chr16 | 2126466   | 2126611   | TSC2  | 693_selected_genes |
| chr16 | 2127573   | 2127752   | TSC2  | 693_selected_genes |
| chr16 | 2129007   | 2129222   | TSC2  | 693_selected_genes |
| chr16 | 2129251   | 2129454   | TSC2  | 693_selected_genes |
| chr16 | 2129532   | 2129695   | TSC2  | 693_selected_genes |
| chr16 | 2130140   | 2130403   | TSC2  | 693_selected_genes |
| chr16 | 2131570   | 2131824   | TSC2  | 693_selected_genes |
| chr16 | 2132411   | 2132530   | TSC2  | 693_selected_genes |
| chr16 | 2133165   | 2133280   | TSC2  | 693_selected_genes |
| chr16 | 2133670   | 2133842   | TSC2  | 693_selected_genes |
| chr16 | 2134203   | 2134741   | TSC2  | 693_selected_genes |
| chr16 | 2134926   | 2135052   | TSC2  | 693_selected_genes |
| chr16 | 2135205   | 2135348   | TSC2  | 693_selected_genes |
| chr16 | 2136168   | 2136405   | TSC2  | 693_selected_genes |
| chr16 | 2136707   | 2136897   | TSC2  | 693_selected_genes |
| chr16 | 2137838   | 2137967   | TSC2  | 693_selected_genes |
| chr16 | 2138023   | 2138165   | TSC2  | 693_selected_genes |
| chr16 | 2138202   | 2138351   | TSC2  | 693_selected_genes |
| chr16 | 2138421   | 2138636   | TSC2  | 693_selected_genes |
| chr14 | 81421999  | 81422219  | TSHR  | 693_selected_genes |
| chr14 | 81528466  | 81528588  | TSHR  | 693_selected_genes |
| chr14 | 81534572  | 81534697  | TSHR  | 693_selected_genes |
| chr14 | 81554223  | 81554397  | TSHR  | 693_selected_genes |
| chr14 | 81557387  | 81557512  | TSHR  | 693_selected_genes |
| chr14 | 81558849  | 81558977  | TSHR  | 693_selected_genes |
| chr14 | 81562957  | 81563076  | TSHR  | 693_selected_genes |
| chr14 | 81574693  | 81574825  | TSHR  | 693_selected_genes |
| chr14 | 81574867  | 81575050  | TSHR  | 693_selected_genes |
| chr14 | 81605997  | 81606236  | TSHR  | 693_selected_genes |
| chr14 | 81609258  | 81610722  | TSHR  | 693_selected_genes |
| chr6  | 80715535  | 80715724  | TTK   | 693_selected_genes |
| chr6  | 80715796  | 80715917  | TTK   | 693_selected_genes |
| chr6  | 80717500  | 80717773  | TTK   | 693_selected_genes |
| chr6  | 80718077  | 80718234  | TTK   | 693_selected_genes |
| chr6  | 80720505  | 80720699  | TTK   | 693_selected_genes |
| chr6  | 80721125  | 80721290  | TTK   | 693_selected_genes |
| chr6  | 80721420  | 80721543  | TTK   | 693_selected_genes |
| chr6  | 80721577  | 80721722  | TTK   | 693_selected_genes |
| chr6  | 80722970  | 80723108  | TTK   | 693_selected_genes |
| chr6  | 80724154  | 80724328  | TTK   | 693_selected_genes |
| chr6  | 80732015  | 80732214  | TTK   | 693_selected_genes |
| chr6  | 80736069  | 80736256  | TTK   | 693_selected_genes |
| chr6  | 80737576  | 80737753  | TTK   | 693_selected_genes |
| chr6  | 80741158  | 80741301  | TTK   | 693_selected_genes |
| chr6  | 80744676  | 80744884  | TTK   | 693_selected_genes |
| chr6  | 80744957  | 80745159  | TTK   | 693_selected_genes |
| chr6  | 80746166  | 80746341  | TTK   | 693_selected_genes |
| chr6  | 80747658  | 80747789  | TTK   | 693_selected_genes |
| chr6  | 80749387  | 80749614  | TTK   | 693_selected_genes |
| chr6  | 80749887  | 80750022  | TTK   | 693_selected_genes |
| chr6  | 80750297  | 80750445  | TTK   | 693_selected_genes |
| chr6  | 80751810  | 80751944  | TTK   | 693_selected_genes |
| chr1  | 145438777 | 145439077 | TXNIP | 693_selected_genes |
| chr1  | 145439482 | 145439690 | TXNIP | 693_selected_genes |
| chr1  | 145439752 | 145439950 | TXNIP | 693_selected_genes |
| chr1  | 145440012 | 145440165 | TXNIP | 693_selected_genes |

|       |           |           |        |                    |
|-------|-----------|-----------|--------|--------------------|
| chr1  | 145440243 | 145440550 | TXNIP  | 693_selected_genes |
| chr1  | 145440606 | 145440813 | TXNIP  | 693_selected_genes |
| chr1  | 145440876 | 145441078 | TXNIP  | 693_selected_genes |
| chr1  | 145441157 | 145441243 | TXNIP  | 693_selected_genes |
| chr18 | 657717    | 657972    | TYMS   | 693_selected_genes |
| chr18 | 659615    | 659739    | TYMS   | 693_selected_genes |
| chr18 | 662120    | 662345    | TYMS   | 693_selected_genes |
| chr18 | 669046    | 669198    | TYMS   | 693_selected_genes |
| chr18 | 670666    | 670892    | TYMS   | 693_selected_genes |
| chr18 | 671354    | 671476    | TYMS   | 693_selected_genes |
| chr18 | 672834    | 673022    | TYMS   | 693_selected_genes |
| chr21 | 44513186  | 44513384  | U2AF1  | 693_selected_genes |
| chr21 | 44514555  | 44514698  | U2AF1  | 693_selected_genes |
| chr21 | 44514739  | 44514923  | U2AF1  | 693_selected_genes |
| chr21 | 44515522  | 44515671  | U2AF1  | 693_selected_genes |
| chr21 | 44515778  | 44515878  | U2AF1  | 693_selected_genes |
| chr21 | 44520537  | 44520654  | U2AF1  | 693_selected_genes |
| chr21 | 44521450  | 44521567  | U2AF1  | 693_selected_genes |
| chr21 | 44524399  | 44524537  | U2AF1  | 693_selected_genes |
| chr21 | 44527535  | 44527629  | U2AF1  | 693_selected_genes |
| chr8  | 103266504 | 103266767 | UBR5   | 693_selected_genes |
| chr8  | 103269834 | 103269970 | UBR5   | 693_selected_genes |
| chr8  | 103271187 | 103271382 | UBR5   | 693_selected_genes |
| chr8  | 103273348 | 103273512 | UBR5   | 693_selected_genes |
| chr8  | 103274117 | 103274323 | UBR5   | 693_selected_genes |
| chr8  | 103276676 | 103276811 | UBR5   | 693_selected_genes |
| chr8  | 103277302 | 103277531 | UBR5   | 693_selected_genes |
| chr8  | 103279149 | 103279260 | UBR5   | 693_selected_genes |
| chr8  | 103281180 | 103281361 | UBR5   | 693_selected_genes |
| chr8  | 103282241 | 103282436 | UBR5   | 693_selected_genes |
| chr8  | 103283336 | 103283498 | UBR5   | 693_selected_genes |
| chr8  | 103284731 | 103285025 | UBR5   | 693_selected_genes |
| chr8  | 103287723 | 103287872 | UBR5   | 693_selected_genes |
| chr8  | 103287910 | 103288081 | UBR5   | 693_selected_genes |
| chr8  | 103289174 | 103289445 | UBR5   | 693_selected_genes |
| chr8  | 103291028 | 103291192 | UBR5   | 693_selected_genes |
| chr8  | 103291238 | 103291461 | UBR5   | 693_selected_genes |
| chr8  | 103292596 | 103292720 | UBR5   | 693_selected_genes |
| chr8  | 103293491 | 103293772 | UBR5   | 693_selected_genes |
| chr8  | 103297329 | 103297591 | UBR5   | 693_selected_genes |
| chr8  | 103297715 | 103298034 | UBR5   | 693_selected_genes |
| chr8  | 103298562 | 103298870 | UBR5   | 693_selected_genes |
| chr8  | 103299635 | 103299817 | UBR5   | 693_selected_genes |
| chr8  | 103300357 | 103300519 | UBR5   | 693_selected_genes |
| chr8  | 103301655 | 103301829 | UBR5   | 693_selected_genes |
| chr8  | 103305807 | 103306097 | UBR5   | 693_selected_genes |
| chr8  | 103306157 | 103306368 | UBR5   | 693_selected_genes |
| chr8  | 103307184 | 103307364 | UBR5   | 693_selected_genes |
| chr8  | 103307406 | 103307583 | UBR5   | 693_selected_genes |
| chr8  | 103307616 | 103307785 | UBR5   | 693_selected_genes |
| chr8  | 103307838 | 103308035 | UBR5   | 693_selected_genes |
| chr8  | 103309095 | 103309237 | UBR5   | 693_selected_genes |
| chr8  | 103309660 | 103309859 | UBR5   | 693_selected_genes |
| chr8  | 103310594 | 103310742 | UBR5   | 693_selected_genes |
| chr8  | 103311050 | 103311224 | UBR5   | 693_selected_genes |
| chr8  | 103311654 | 103311800 | UBR5   | 693_selected_genes |
| chr8  | 103312202 | 103312404 | UBR5   | 693_selected_genes |
| chr8  | 103316245 | 103316422 | UBR5   | 693_selected_genes |
| chr8  | 103317287 | 103317548 | UBR5   | 693_selected_genes |
| chr8  | 103323501 | 103323749 | UBR5   | 693_selected_genes |
| chr8  | 103323937 | 103324142 | UBR5   | 693_selected_genes |
| chr8  | 103324336 | 103324498 | UBR5   | 693_selected_genes |
| chr8  | 103324544 | 103324738 | UBR5   | 693_selected_genes |
| chr8  | 103326006 | 103326169 | UBR5   | 693_selected_genes |
| chr8  | 103326946 | 103327106 | UBR5   | 693_selected_genes |
| chr8  | 103335513 | 103335748 | UBR5   | 693_selected_genes |
| chr8  | 103338748 | 103338916 | UBR5   | 693_selected_genes |
| chr8  | 103339944 | 103340149 | UBR5   | 693_selected_genes |
| chr8  | 103341292 | 103341453 | UBR5   | 693_selected_genes |
| chr8  | 103341485 | 103341652 | UBR5   | 693_selected_genes |
| chr8  | 103354675 | 103354937 | UBR5   | 693_selected_genes |
| chr8  | 103357598 | 103357798 | UBR5   | 693_selected_genes |
| chr8  | 103358438 | 103358648 | UBR5   | 693_selected_genes |
| chr8  | 103359105 | 103359345 | UBR5   | 693_selected_genes |
| chr8  | 103372273 | 103372443 | UBR5   | 693_selected_genes |
| chr8  | 103372791 | 103372918 | UBR5   | 693_selected_genes |
| chr8  | 103373327 | 103373459 | UBR5   | 693_selected_genes |
| chr8  | 103373784 | 103373879 | UBR5   | 693_selected_genes |
| chr8  | 103424375 | 103424487 | UBR5   | 693_selected_genes |
| chr2  | 234526328 | 234527233 | UGT1A1 | 693_selected_genes |
| chr2  | 234580555 | 234581460 | UGT1A1 | 693_selected_genes |
| chr2  | 234621612 | 234622529 | UGT1A1 | 693_selected_genes |
| chr2  | 234637747 | 234638664 | UGT1A1 | 693_selected_genes |
| chr2  | 234668908 | 234669822 | UGT1A1 | 693_selected_genes |

|       |           |           |        |                    |
|-------|-----------|-----------|--------|--------------------|
| chr2  | 234675654 | 234675836 | UGT1A1 | 693_selected_genes |
| chr2  | 234676469 | 234676607 | UGT1A1 | 693_selected_genes |
| chr2  | 234676840 | 234677110 | UGT1A1 | 693_selected_genes |
| chr2  | 234678151 | 234678232 | UGT1A1 | 693_selected_genes |
| chr2  | 234680882 | 234681230 | UGT1A1 | 693_selected_genes |
| chrX  | 118968815 | 118969015 | UPF3B  | 693_selected_genes |
| chrX  | 118971694 | 118972039 | UPF3B  | 693_selected_genes |
| chrX  | 118972304 | 118972515 | UPF3B  | 693_selected_genes |
| chrX  | 118974583 | 118974672 | UPF3B  | 693_selected_genes |
| chrX  | 118975013 | 118975246 | UPF3B  | 693_selected_genes |
| chrX  | 118975672 | 118975766 | UPF3B  | 693_selected_genes |
| chrX  | 118977128 | 118977289 | UPF3B  | 693_selected_genes |
| chrX  | 118979135 | 118979284 | UPF3B  | 693_selected_genes |
| chrX  | 118985432 | 118985589 | UPF3B  | 693_selected_genes |
| chrX  | 118985704 | 118985861 | UPF3B  | 693_selected_genes |
| chrX  | 118986710 | 118986916 | UPF3B  | 693_selected_genes |
| chrX  | 40982856  | 40983002  | USP9X  | 693_selected_genes |
| chrX  | 40988227  | 40988423  | USP9X  | 693_selected_genes |
| chrX  | 40990684  | 40990814  | USP9X  | 693_selected_genes |
| chrX  | 40993952  | 40994115  | USP9X  | 693_selected_genes |
| chrX  | 40996031  | 40996300  | USP9X  | 693_selected_genes |
| chrX  | 40999883  | 41000049  | USP9X  | 693_selected_genes |
| chrX  | 41000193  | 41000495  | USP9X  | 693_selected_genes |
| chrX  | 41000520  | 41000709  | USP9X  | 693_selected_genes |
| chrX  | 41002518  | 41002721  | USP9X  | 693_selected_genes |
| chrX  | 41003749  | 41003904  | USP9X  | 693_selected_genes |
| chrX  | 41007596  | 41007853  | USP9X  | 693_selected_genes |
| chrX  | 41010148  | 41010335  | USP9X  | 693_selected_genes |
| chrX  | 41012175  | 41012359  | USP9X  | 693_selected_genes |
| chrX  | 41022017  | 41022155  | USP9X  | 693_selected_genes |
| chrX  | 41025099  | 41025492  | USP9X  | 693_selected_genes |
| chrX  | 41026709  | 41026855  | USP9X  | 693_selected_genes |
| chrX  | 41027234  | 41027496  | USP9X  | 693_selected_genes |
| chrX  | 41029222  | 41029513  | USP9X  | 693_selected_genes |
| chrX  | 41029697  | 41029897  | USP9X  | 693_selected_genes |
| chrX  | 41030885  | 41030965  | USP9X  | 693_selected_genes |
| chrX  | 41031065  | 41031236  | USP9X  | 693_selected_genes |
| chrX  | 41043225  | 41043406  | USP9X  | 693_selected_genes |
| chrX  | 41043624  | 41043953  | USP9X  | 693_selected_genes |
| chrX  | 41045744  | 41045920  | USP9X  | 693_selected_genes |
| chrX  | 41047219  | 41047395  | USP9X  | 693_selected_genes |
| chrX  | 41048536  | 41048753  | USP9X  | 693_selected_genes |
| chrX  | 41055132  | 41055283  | USP9X  | 693_selected_genes |
| chrX  | 41055478  | 41055637  | USP9X  | 693_selected_genes |
| chrX  | 41055819  | 41056016  | USP9X  | 693_selected_genes |
| chrX  | 41056591  | 41056788  | USP9X  | 693_selected_genes |
| chrX  | 41057755  | 41058028  | USP9X  | 693_selected_genes |
| chrX  | 41060287  | 41060558  | USP9X  | 693_selected_genes |
| chrX  | 41064530  | 41064771  | USP9X  | 693_selected_genes |
| chrX  | 41069736  | 41069960  | USP9X  | 693_selected_genes |
| chrX  | 41073795  | 41073987  | USP9X  | 693_selected_genes |
| chrX  | 41075126  | 41075930  | USP9X  | 693_selected_genes |
| chrX  | 41076447  | 41076621  | USP9X  | 693_selected_genes |
| chrX  | 41077599  | 41077875  | USP9X  | 693_selected_genes |
| chrX  | 41078329  | 41078509  | USP9X  | 693_selected_genes |
| chrX  | 41082444  | 41082680  | USP9X  | 693_selected_genes |
| chrX  | 41083969  | 41084240  | USP9X  | 693_selected_genes |
| chrX  | 41084276  | 41084415  | USP9X  | 693_selected_genes |
| chrX  | 41088480  | 41088687  | USP9X  | 693_selected_genes |
| chrX  | 41088794  | 41089105  | USP9X  | 693_selected_genes |
| chrX  | 41089728  | 41089874  | USP9X  | 693_selected_genes |
| chrX  | 41091614  | 41091802  | USP9X  | 693_selected_genes |
| chr3  | 10183506  | 10183896  | VHL    | 693_selected_genes |
| chr3  | 10188172  | 10188345  | VHL    | 693_selected_genes |
| chr3  | 10191445  | 10191674  | VHL    | 693_selected_genes |
| chr1  | 117690254 | 117690429 | VTCN1  | 693_selected_genes |
| chr1  | 117695687 | 117696016 | VTCN1  | 693_selected_genes |
| chr1  | 117699170 | 117699568 | VTCN1  | 693_selected_genes |
| chr1  | 117712703 | 117712818 | VTCN1  | 693_selected_genes |
| chr1  | 117715783 | 117715874 | VTCN1  | 693_selected_genes |
| chr1  | 117753420 | 117753502 | VTCN1  | 693_selected_genes |
| chr13 | 27216382  | 27216565  | WASF3  | 693_selected_genes |
| chr13 | 27239139  | 27239324  | WASF3  | 693_selected_genes |
| chr13 | 27241628  | 27241832  | WASF3  | 693_selected_genes |
| chr13 | 27245983  | 27246151  | WASF3  | 693_selected_genes |
| chr13 | 27250660  | 27250886  | WASF3  | 693_selected_genes |
| chr13 | 27254146  | 27254363  | WASF3  | 693_selected_genes |
| chr13 | 27255165  | 27255482  | WASF3  | 693_selected_genes |
| chr13 | 27256718  | 27257136  | WASF3  | 693_selected_genes |
| chr13 | 27259799  | 27260007  | WASF3  | 693_selected_genes |
| chr4  | 1902356   | 1903003   | WHSC1  | 693_selected_genes |
| chr4  | 1905917   | 1906130   | WHSC1  | 693_selected_genes |
| chr4  | 1913792   | 1913904   | WHSC1  | 693_selected_genes |
| chr4  | 1918572   | 1918789   | WHSC1  | 693_selected_genes |

|       |           |           |         |                    |
|-------|-----------|-----------|---------|--------------------|
| chr4  | 1919842   | 1920375   | WHSC1   | 693_selected_genes |
| chr4  | 1932327   | 1932522   | WHSC1   | 693_selected_genes |
| chr4  | 1936845   | 1937014   | WHSC1   | 693_selected_genes |
| chr4  | 1940152   | 1940284   | WHSC1   | 693_selected_genes |
| chr4  | 1941355   | 1941539   | WHSC1   | 693_selected_genes |
| chr4  | 1944040   | 1944153   | WHSC1   | 693_selected_genes |
| chr4  | 1952773   | 1952955   | WHSC1   | 693_selected_genes |
| chr4  | 1953809   | 1953983   | WHSC1   | 693_selected_genes |
| chr4  | 1954844   | 1955276   | WHSC1   | 693_selected_genes |
| chr4  | 1956862   | 1957092   | WHSC1   | 693_selected_genes |
| chr4  | 1957394   | 1957601   | WHSC1   | 693_selected_genes |
| chr4  | 1957684   | 1957940   | WHSC1   | 693_selected_genes |
| chr4  | 1959634   | 1959788   | WHSC1   | 693_selected_genes |
| chr4  | 1961172   | 1961492   | WHSC1   | 693_selected_genes |
| chr4  | 1962736   | 1962903   | WHSC1   | 693_selected_genes |
| chr4  | 1976564   | 1976756   | WHSC1   | 693_selected_genes |
| chr4  | 1976995   | 1977152   | WHSC1   | 693_selected_genes |
| chr4  | 1978176   | 1978431   | WHSC1   | 693_selected_genes |
| chr4  | 1980339   | 1980661   | WHSC1   | 693_selected_genes |
| chr8  | 38133133  | 38133425  | WHSC1L1 | 693_selected_genes |
| chr8  | 38133788  | 38134043  | WHSC1L1 | 693_selected_genes |
| chr8  | 38135798  | 38135955  | WHSC1L1 | 693_selected_genes |
| chr8  | 38137032  | 38137224  | WHSC1L1 | 693_selected_genes |
| chr8  | 38138959  | 38139126  | WHSC1L1 | 693_selected_genes |
| chr8  | 38145979  | 38146299  | WHSC1L1 | 693_selected_genes |
| chr8  | 38146885  | 38147048  | WHSC1L1 | 693_selected_genes |
| chr8  | 38147967  | 38148220  | WHSC1L1 | 693_selected_genes |
| chr8  | 38153288  | 38153495  | WHSC1L1 | 693_selected_genes |
| chr8  | 38156936  | 38157133  | WHSC1L1 | 693_selected_genes |
| chr8  | 38162079  | 38162300  | WHSC1L1 | 693_selected_genes |
| chr8  | 38162740  | 38162988  | WHSC1L1 | 693_selected_genes |
| chr8  | 38172139  | 38172316  | WHSC1L1 | 693_selected_genes |
| chr8  | 38172908  | 38173087  | WHSC1L1 | 693_selected_genes |
| chr8  | 38173404  | 38173585  | WHSC1L1 | 693_selected_genes |
| chr8  | 38175448  | 38175581  | WHSC1L1 | 693_selected_genes |
| chr8  | 38176387  | 38176483  | WHSC1L1 | 693_selected_genes |
| chr8  | 38178537  | 38178715  | WHSC1L1 | 693_selected_genes |
| chr8  | 38184222  | 38184399  | WHSC1L1 | 693_selected_genes |
| chr8  | 38186870  | 38187436  | WHSC1L1 | 693_selected_genes |
| chr8  | 38188923  | 38189128  | WHSC1L1 | 693_selected_genes |
| chr8  | 38194797  | 38195010  | WHSC1L1 | 693_selected_genes |
| chr8  | 38196028  | 38196150  | WHSC1L1 | 693_selected_genes |
| chr8  | 38204989  | 38205714  | WHSC1L1 | 693_selected_genes |
| chr6  | 112375481 | 112375633 | WISP3   | 693_selected_genes |
| chr6  | 112381190 | 112381303 | WISP3   | 693_selected_genes |
| chr6  | 112382168 | 112382522 | WISP3   | 693_selected_genes |
| chr6  | 112385932 | 112386225 | WISP3   | 693_selected_genes |
| chr6  | 112388146 | 112388260 | WISP3   | 693_selected_genes |
| chr6  | 112389382 | 112389626 | WISP3   | 693_selected_genes |
| chr6  | 112390516 | 112390848 | WISP3   | 693_selected_genes |
| chr12 | 862706    | 863515    | WNK1    | 693_selected_genes |
| chr12 | 922782    | 923005    | WNK1    | 693_selected_genes |
| chr12 | 936182    | 936482    | WNK1    | 693_selected_genes |
| chr12 | 939143    | 939351    | WNK1    | 693_selected_genes |
| chr12 | 960833    | 960973    | WNK1    | 693_selected_genes |
| chr12 | 966301    | 966440    | WNK1    | 693_selected_genes |
| chr12 | 968385    | 968655    | WNK1    | 693_selected_genes |
| chr12 | 970153    | 970534    | WNK1    | 693_selected_genes |
| chr12 | 971221    | 971461    | WNK1    | 693_selected_genes |
| chr12 | 974250    | 974555    | WNK1    | 693_selected_genes |
| chr12 | 976970    | 978325    | WNK1    | 693_selected_genes |
| chr12 | 980405    | 980539    | WNK1    | 693_selected_genes |
| chr12 | 987352    | 987552    | WNK1    | 693_selected_genes |
| chr12 | 988713    | 989222    | WNK1    | 693_selected_genes |
| chr12 | 989861    | 990190    | WNK1    | 693_selected_genes |
| chr12 | 990832    | 990980    | WNK1    | 693_selected_genes |
| chr12 | 991051    | 991264    | WNK1    | 693_selected_genes |
| chr12 | 992083    | 992250    | WNK1    | 693_selected_genes |
| chr12 | 992535    | 992759    | WNK1    | 693_selected_genes |
| chr12 | 992914    | 993022    | WNK1    | 693_selected_genes |
| chr12 | 993261    | 993434    | WNK1    | 693_selected_genes |
| chr12 | 993789    | 995275    | WNK1    | 693_selected_genes |
| chr12 | 996361    | 996495    | WNK1    | 693_selected_genes |
| chr12 | 998280    | 998414    | WNK1    | 693_selected_genes |
| chr12 | 999593    | 999704    | WNK1    | 693_selected_genes |
| chr12 | 1003702   | 1003826   | WNK1    | 693_selected_genes |
| chr12 | 1005211   | 1005923   | WNK1    | 693_selected_genes |
| chr12 | 1006619   | 1006872   | WNK1    | 693_selected_genes |
| chr12 | 1009616   | 1009861   | WNK1    | 693_selected_genes |
| chr12 | 1010701   | 1010844   | WNK1    | 693_selected_genes |
| chr12 | 1013593   | 1013685   | WNK1    | 693_selected_genes |
| chr12 | 1016987   | 1017225   | WNK1    | 693_selected_genes |
| chr12 | 1017615   | 1017983   | WNK1    | 693_selected_genes |
| chr8  | 30915938  | 30916084  | WRN     | 693_selected_genes |

|       |           |           |      |                    |
|-------|-----------|-----------|------|--------------------|
| chr8  | 30916643  | 30916806  | WRN  | 693_selected_genes |
| chr8  | 30921779  | 30921975  | WRN  | 693_selected_genes |
| chr8  | 30922405  | 30922604  | WRN  | 693_selected_genes |
| chr8  | 30924523  | 30924723  | WRN  | 693_selected_genes |
| chr8  | 30925748  | 30925868  | WRN  | 693_selected_genes |
| chr8  | 30933663  | 30933828  | WRN  | 693_selected_genes |
| chr8  | 30938357  | 30938837  | WRN  | 693_selected_genes |
| chr8  | 30941189  | 30941320  | WRN  | 693_selected_genes |
| chr8  | 30942656  | 30942787  | WRN  | 693_selected_genes |
| chr8  | 30945266  | 30945461  | WRN  | 693_selected_genes |
| chr8  | 30946380  | 30946506  | WRN  | 693_selected_genes |
| chr8  | 30947955  | 30948073  | WRN  | 693_selected_genes |
| chr8  | 30948324  | 30948483  | WRN  | 693_selected_genes |
| chr8  | 30949320  | 30949439  | WRN  | 693_selected_genes |
| chr8  | 30954258  | 30954391  | WRN  | 693_selected_genes |
| chr8  | 30958339  | 30958496  | WRN  | 693_selected_genes |
| chr8  | 30969105  | 30969340  | WRN  | 693_selected_genes |
| chr8  | 30973844  | 30974069  | WRN  | 693_selected_genes |
| chr8  | 30977733  | 30977965  | WRN  | 693_selected_genes |
| chr8  | 30982012  | 30982164  | WRN  | 693_selected_genes |
| chr8  | 30982398  | 30982541  | WRN  | 693_selected_genes |
| chr8  | 30989855  | 30990047  | WRN  | 693_selected_genes |
| chr8  | 30998920  | 30999141  | WRN  | 693_selected_genes |
| chr8  | 30999171  | 30999316  | WRN  | 693_selected_genes |
| chr8  | 31000116  | 31000242  | WRN  | 693_selected_genes |
| chr8  | 31001040  | 31001164  | WRN  | 693_selected_genes |
| chr8  | 31004543  | 31004669  | WRN  | 693_selected_genes |
| chr8  | 31004854  | 31005017  | WRN  | 693_selected_genes |
| chr8  | 31007831  | 31007996  | WRN  | 693_selected_genes |
| chr8  | 31012114  | 31012296  | WRN  | 693_selected_genes |
| chr8  | 31014858  | 31015071  | WRN  | 693_selected_genes |
| chr8  | 31024512  | 31024771  | WRN  | 693_selected_genes |
| chr8  | 31030485  | 31030643  | WRN  | 693_selected_genes |
| chr11 | 32410578  | 32410750  | WT1  | 693_selected_genes |
| chr11 | 32413492  | 32413635  | WT1  | 693_selected_genes |
| chr11 | 32414186  | 32414326  | WT1  | 693_selected_genes |
| chr11 | 32417777  | 32417978  | WT1  | 693_selected_genes |
| chr11 | 32421468  | 32421615  | WT1  | 693_selected_genes |
| chr11 | 32438010  | 32438111  | WT1  | 693_selected_genes |
| chr11 | 32439093  | 32439225  | WT1  | 693_selected_genes |
| chr11 | 32449476  | 32449629  | WT1  | 693_selected_genes |
| chr11 | 32450017  | 32450190  | WT1  | 693_selected_genes |
| chr11 | 32452050  | 32452110  | WT1  | 693_selected_genes |
| chr11 | 32456220  | 32456916  | WT1  | 693_selected_genes |
| chrX  | 123019487 | 123020414 | XIAP | 693_selected_genes |
| chrX  | 123022443 | 123022593 | XIAP | 693_selected_genes |
| chrX  | 123025062 | 123025191 | XIAP | 693_selected_genes |
| chrX  | 123026555 | 123026648 | XIAP | 693_selected_genes |
| chrX  | 123034317 | 123034568 | XIAP | 693_selected_genes |
| chrX  | 123040812 | 123041056 | XIAP | 693_selected_genes |
| chr9  | 100437695 | 100437894 | XPA  | 693_selected_genes |
| chr9  | 100444565 | 100444737 | XPA  | 693_selected_genes |
| chr9  | 100447179 | 100447347 | XPA  | 693_selected_genes |
| chr9  | 100449352 | 100449568 | XPA  | 693_selected_genes |
| chr9  | 100451790 | 100451946 | XPA  | 693_selected_genes |
| chr9  | 100455905 | 100456066 | XPA  | 693_selected_genes |
| chr9  | 100459377 | 100459599 | XPA  | 693_selected_genes |
| chr3  | 14187415  | 14187684  | XPC  | 693_selected_genes |
| chr3  | 14188764  | 14188904  | XPC  | 693_selected_genes |
| chr3  | 14189382  | 14189526  | XPC  | 693_selected_genes |
| chr3  | 14190036  | 14190256  | XPC  | 693_selected_genes |
| chr3  | 14190288  | 14190473  | XPC  | 693_selected_genes |
| chr3  | 14193809  | 14193941  | XPC  | 693_selected_genes |
| chr3  | 14197809  | 14198020  | XPC  | 693_selected_genes |
| chr3  | 14199485  | 14200417  | XPC  | 693_selected_genes |
| chr3  | 14201215  | 14201355  | XPC  | 693_selected_genes |
| chr3  | 14206287  | 14206458  | XPC  | 693_selected_genes |
| chr3  | 14206902  | 14207110  | XPC  | 693_selected_genes |
| chr3  | 14208643  | 14208778  | XPC  | 693_selected_genes |
| chr3  | 14209731  | 14209905  | XPC  | 693_selected_genes |
| chr3  | 14211912  | 14212075  | XPC  | 693_selected_genes |
| chr3  | 14214341  | 14214587  | XPC  | 693_selected_genes |
| chr3  | 14219940  | 14220093  | XPC  | 693_selected_genes |
| chr2  | 61705929  | 61706126  | XPO1 | 693_selected_genes |
| chr2  | 61708294  | 61708441  | XPO1 | 693_selected_genes |
| chr2  | 61709489  | 61709699  | XPO1 | 693_selected_genes |
| chr2  | 61710066  | 61710251  | XPO1 | 693_selected_genes |
| chr2  | 61711046  | 61711265  | XPO1 | 693_selected_genes |
| chr2  | 61712877  | 61713122  | XPO1 | 693_selected_genes |
| chr2  | 61715274  | 61715431  | XPO1 | 693_selected_genes |
| chr2  | 61715697  | 61715931  | XPO1 | 693_selected_genes |
| chr2  | 61717751  | 61717936  | XPO1 | 693_selected_genes |
| chr2  | 61719144  | 61719358  | XPO1 | 693_selected_genes |
| chr2  | 61719434  | 61719641  | XPO1 | 693_selected_genes |

|       |           |           |         |                    |
|-------|-----------|-----------|---------|--------------------|
| chr2  | 61719676  | 61719908  | XPO1    | 693_selected_genes |
| chr2  | 61720024  | 61720213  | XPO1    | 693_selected_genes |
| chr2  | 61721003  | 61721251  | XPO1    | 693_selected_genes |
| chr2  | 61722564  | 61722773  | XPO1    | 693_selected_genes |
| chr2  | 61723988  | 61724167  | XPO1    | 693_selected_genes |
| chr2  | 61725782  | 61725952  | XPO1    | 693_selected_genes |
| chr2  | 61725974  | 61726073  | XPO1    | 693_selected_genes |
| chr2  | 61726822  | 61727054  | XPO1    | 693_selected_genes |
| chr2  | 61729105  | 61729200  | XPO1    | 693_selected_genes |
| chr2  | 61729358  | 61729470  | XPO1    | 693_selected_genes |
| chr2  | 61749720  | 61749843  | XPO1    | 693_selected_genes |
| chr2  | 61753508  | 61753681  | XPO1    | 693_selected_genes |
| chr2  | 61760881  | 61761057  | XPO1    | 693_selected_genes |
| chr7  | 152345701 | 152346473 | XRCC2   | 693_selected_genes |
| chr7  | 152357760 | 152357892 | XRCC2   | 693_selected_genes |
| chr7  | 152373100 | 152373189 | XRCC2   | 693_selected_genes |
| chr14 | 104165109 | 104165379 | XRCC3   | 693_selected_genes |
| chr14 | 104165444 | 104165541 | XRCC3   | 693_selected_genes |
| chr14 | 104165675 | 104165938 | XRCC3   | 693_selected_genes |
| chr14 | 104169484 | 104169689 | XRCC3   | 693_selected_genes |
| chr14 | 104172640 | 104172737 | XRCC3   | 693_selected_genes |
| chr14 | 104173314 | 104173577 | XRCC3   | 693_selected_genes |
| chr14 | 104174833 | 104175021 | XRCC3   | 693_selected_genes |
| chr14 | 104177344 | 104177449 | XRCC3   | 693_selected_genes |
| chr11 | 101981554 | 101981925 | YAP1    | 693_selected_genes |
| chr11 | 101984849 | 101985150 | YAP1    | 693_selected_genes |
| chr11 | 102033161 | 102033327 | YAP1    | 693_selected_genes |
| chr11 | 102056723 | 102056887 | YAP1    | 693_selected_genes |
| chr11 | 102076598 | 102076842 | YAP1    | 693_selected_genes |
| chr11 | 102080222 | 102080320 | YAP1    | 693_selected_genes |
| chr11 | 102094327 | 102094508 | YAP1    | 693_selected_genes |
| chr11 | 102098174 | 102098337 | YAP1    | 693_selected_genes |
| chr11 | 102100407 | 102100696 | YAP1    | 693_selected_genes |
| chr18 | 724398    | 724657    | YES1    | 693_selected_genes |
| chr18 | 732808    | 732990    | YES1    | 693_selected_genes |
| chr18 | 736782    | 736986    | YES1    | 693_selected_genes |
| chr18 | 739709    | 739836    | YES1    | 693_selected_genes |
| chr18 | 742892    | 743122    | YES1    | 693_selected_genes |
| chr18 | 743234    | 743440    | YES1    | 693_selected_genes |
| chr18 | 745682    | 745882    | YES1    | 693_selected_genes |
| chr18 | 745922    | 746076    | YES1    | 693_selected_genes |
| chr18 | 747894    | 748043    | YES1    | 693_selected_genes |
| chr18 | 751679    | 751829    | YES1    | 693_selected_genes |
| chr18 | 756531    | 756860    | YES1    | 693_selected_genes |
| chr18 | 775164    | 775221    | YES1    | 693_selected_genes |
| chr16 | 72821037  | 72822772  | ZFH3    | 693_selected_genes |
| chr16 | 72827128  | 72832638  | ZFH3    | 693_selected_genes |
| chr16 | 72833900  | 72834053  | ZFH3    | 693_selected_genes |
| chr16 | 72845450  | 72845701  | ZFH3    | 693_selected_genes |
| chr16 | 72845778  | 72845962  | ZFH3    | 693_selected_genes |
| chr16 | 72863652  | 72863783  | ZFH3    | 693_selected_genes |
| chr16 | 72923604  | 72923886  | ZFH3    | 693_selected_genes |
| chr16 | 72984342  | 72984889  | ZFH3    | 693_selected_genes |
| chr16 | 72991300  | 72994069  | ZFH3    | 693_selected_genes |
| chr14 | 69256224  | 69257234  | ZFP36L1 | 693_selected_genes |
| chr14 | 69257674  | 69257929  | ZFP36L1 | 693_selected_genes |
| chr14 | 69259573  | 69259812  | ZFP36L1 | 693_selected_genes |
| chr14 | 69262485  | 69263036  | ZFP36L1 | 693_selected_genes |
| chr2  | 43451432  | 43452916  | ZFP36L2 | 693_selected_genes |
| chr2  | 43453378  | 43453479  | ZFP36L2 | 693_selected_genes |
| chr13 | 20567187  | 20568084  | ZMYM2   | 693_selected_genes |
| chr13 | 20576964  | 20577300  | ZMYM2   | 693_selected_genes |
| chr13 | 20579188  | 20579404  | ZMYM2   | 693_selected_genes |
| chr13 | 20580488  | 20580751  | ZMYM2   | 693_selected_genes |
| chr13 | 20593661  | 20593849  | ZMYM2   | 693_selected_genes |
| chr13 | 20600726  | 20600927  | ZMYM2   | 693_selected_genes |
| chr13 | 20601317  | 20601483  | ZMYM2   | 693_selected_genes |
| chr13 | 20605433  | 20605607  | ZMYM2   | 693_selected_genes |
| chr13 | 20608368  | 20608569  | ZMYM2   | 693_selected_genes |
| chr13 | 20610851  | 20611076  | ZMYM2   | 693_selected_genes |
| chr13 | 20625547  | 20625763  | ZMYM2   | 693_selected_genes |
| chr13 | 20626391  | 20626476  | ZMYM2   | 693_selected_genes |
| chr13 | 20632689  | 20632869  | ZMYM2   | 693_selected_genes |
| chr13 | 20632963  | 20633078  | ZMYM2   | 693_selected_genes |
| chr13 | 20633561  | 20633727  | ZMYM2   | 693_selected_genes |
| chr13 | 20635167  | 20635389  | ZMYM2   | 693_selected_genes |
| chr13 | 20636960  | 20637136  | ZMYM2   | 693_selected_genes |
| chr13 | 20638565  | 20638710  | ZMYM2   | 693_selected_genes |
| chr13 | 20640965  | 20641184  | ZMYM2   | 693_selected_genes |
| chr13 | 20641353  | 20641555  | ZMYM2   | 693_selected_genes |
| chr13 | 20656130  | 20656295  | ZMYM2   | 693_selected_genes |
| chr13 | 20656895  | 20657197  | ZMYM2   | 693_selected_genes |
| chr13 | 20657770  | 20657941  | ZMYM2   | 693_selected_genes |
| chr13 | 20659936  | 20660179  | ZMYM2   | 693_selected_genes |

|       |          |          |          |                    |
|-------|----------|----------|----------|--------------------|
| chrX  | 70460740 | 70460983 | ZMYM3    | 693_selected_genes |
| chrX  | 70461051 | 70461219 | ZMYM3    | 693_selected_genes |
| chrX  | 70461994 | 70462299 | ZMYM3    | 693_selected_genes |
| chrX  | 70462794 | 70462959 | ZMYM3    | 693_selected_genes |
| chrX  | 70463653 | 70463855 | ZMYM3    | 693_selected_genes |
| chrX  | 70464126 | 70464345 | ZMYM3    | 693_selected_genes |
| chrX  | 70464614 | 70464768 | ZMYM3    | 693_selected_genes |
| chrX  | 70465163 | 70465360 | ZMYM3    | 693_selected_genes |
| chrX  | 70465492 | 70465717 | ZMYM3    | 693_selected_genes |
| chrX  | 70465810 | 70465973 | ZMYM3    | 693_selected_genes |
| chrX  | 70466177 | 70466387 | ZMYM3    | 693_selected_genes |
| chrX  | 70466419 | 70466567 | ZMYM3    | 693_selected_genes |
| chrX  | 70467169 | 70467385 | ZMYM3    | 693_selected_genes |
| chrX  | 70467558 | 70467781 | ZMYM3    | 693_selected_genes |
| chrX  | 70467986 | 70468187 | ZMYM3    | 693_selected_genes |
| chrX  | 70468262 | 70468399 | ZMYM3    | 693_selected_genes |
| chrX  | 70468510 | 70468676 | ZMYM3    | 693_selected_genes |
| chrX  | 70468843 | 70469044 | ZMYM3    | 693_selected_genes |
| chrX  | 70469267 | 70469554 | ZMYM3    | 693_selected_genes |
| chrX  | 70469850 | 70470078 | ZMYM3    | 693_selected_genes |
| chrX  | 70470256 | 70470601 | ZMYM3    | 693_selected_genes |
| chrX  | 70471002 | 70471125 | ZMYM3    | 693_selected_genes |
| chrX  | 70471382 | 70471476 | ZMYM3    | 693_selected_genes |
| chrX  | 70472413 | 70473130 | ZMYM3    | 693_selected_genes |
| chr20 | 52185629 | 52185828 | ZNF217   | 693_selected_genes |
| chr20 | 52188257 | 52188417 | ZNF217   | 693_selected_genes |
| chr20 | 52192240 | 52193844 | ZNF217   | 693_selected_genes |
| chr20 | 52194847 | 52195014 | ZNF217   | 693_selected_genes |
| chr20 | 52197974 | 52199390 | ZNF217   | 693_selected_genes |
| chr8  | 37553472 | 37553765 | ZNF703   | 693_selected_genes |
| chr8  | 37554637 | 37556217 | ZNF703   | 693_selected_genes |
| chr17 | 80787992 | 80788778 | ZNF750   | 693_selected_genes |
| chr17 | 80788869 | 80790355 | ZNF750   | 693_selected_genes |
| chr19 | 58361812 | 58361954 | ZNF814   | 693_selected_genes |
| chr19 | 58363687 | 58363781 | ZNF814   | 693_selected_genes |
| chr19 | 58370242 | 58370376 | ZNF814   | 693_selected_genes |
| chr19 | 58376212 | 58376312 | ZNF814   | 693_selected_genes |
| chr19 | 58379809 | 58379972 | ZNF814   | 693_selected_genes |
| chr19 | 58384164 | 58386619 | ZNF814   | 693_selected_genes |
| chr19 | 58388232 | 58388435 | ZNF814   | 693_selected_genes |
| chr19 | 58397225 | 58397362 | ZNF814   | 693_selected_genes |
| chr19 | 58400109 | 58400195 | ZNF814   | 693_selected_genes |
| chrX  | 15808593 | 15808684 | ZRSR2    | 693_selected_genes |
| chrX  | 15809031 | 15809161 | ZRSR2    | 693_selected_genes |
| chrX  | 15817969 | 15818101 | ZRSR2    | 693_selected_genes |
| chrX  | 15819371 | 15819662 | ZRSR2    | 693_selected_genes |
| chrX  | 15821785 | 15821944 | ZRSR2    | 693_selected_genes |
| chrX  | 15822208 | 15822345 | ZRSR2    | 693_selected_genes |
| chrX  | 15826330 | 15826419 | ZRSR2    | 693_selected_genes |
| chrX  | 15827297 | 15827466 | ZRSR2    | 693_selected_genes |
| chrX  | 15833774 | 15834038 | ZRSR2    | 693_selected_genes |
| chrX  | 15836684 | 15836790 | ZRSR2    | 693_selected_genes |
| chrX  | 15838304 | 15838464 | ZRSR2    | 693_selected_genes |
| chrX  | 15840828 | 15841390 | ZRSR2    | 693_selected_genes |
| chr16 | 77281845 | 77281987 | ADAMTS18 | 693_selected_genes |
| chr16 | 77317827 | 77317993 | ADAMTS18 | 693_selected_genes |
| chr16 | 77323135 | 77323333 | ADAMTS18 | 693_selected_genes |
| chr16 | 77325137 | 77325400 | ADAMTS18 | 693_selected_genes |
| chr16 | 77326947 | 77327180 | ADAMTS18 | 693_selected_genes |
| chr16 | 77328794 | 77329049 | ADAMTS18 | 693_selected_genes |
| chr16 | 77331160 | 77331337 | ADAMTS18 | 693_selected_genes |
| chr16 | 77334134 | 77334326 | ADAMTS18 | 693_selected_genes |
| chr16 | 77353720 | 77354015 | ADAMTS18 | 693_selected_genes |
| chr16 | 77354950 | 77355124 | ADAMTS18 | 693_selected_genes |
| chr16 | 77356207 | 77356388 | ADAMTS18 | 693_selected_genes |
| chr16 | 77359737 | 77359960 | ADAMTS18 | 693_selected_genes |
| chr16 | 77369627 | 77369826 | ADAMTS18 | 693_selected_genes |
| chr16 | 77375575 | 77375721 | ADAMTS18 | 693_selected_genes |
| chr16 | 77387604 | 77387808 | ADAMTS18 | 693_selected_genes |
| chr16 | 77389811 | 77389999 | ADAMTS18 | 693_selected_genes |
| chr16 | 77393189 | 77393345 | ADAMTS18 | 693_selected_genes |
| chr16 | 77395976 | 77396186 | ADAMTS18 | 693_selected_genes |
| chr16 | 77397673 | 77397807 | ADAMTS18 | 693_selected_genes |
| chr16 | 77398059 | 77398303 | ADAMTS18 | 693_selected_genes |
| chr16 | 77401308 | 77401645 | ADAMTS18 | 693_selected_genes |
| chr16 | 77465166 | 77465533 | ADAMTS18 | 693_selected_genes |
| chr16 | 77468289 | 77468427 | ADAMTS18 | 693_selected_genes |
| chr16 | 77468477 | 77468617 | ADAMTS18 | 693_selected_genes |
| chr19 | 13049468 | 13049609 | CALR     | 693_selected_genes |
| chr19 | 13049922 | 13050074 | CALR     | 693_selected_genes |
| chr19 | 13050216 | 13050470 | CALR     | 693_selected_genes |
| chr19 | 13050841 | 13050986 | CALR     | 693_selected_genes |
| chr19 | 13051031 | 13051291 | CALR     | 693_selected_genes |
| chr19 | 13051329 | 13051493 | CALR     | 693_selected_genes |

|       |           |           |        |                    |
|-------|-----------|-----------|--------|--------------------|
| chr19 | 13051532  | 13051726  | CALR   | 693_selected_genes |
| chr19 | 13054325  | 13054468  | CALR   | 693_selected_genes |
| chr19 | 13054501  | 13054820  | CALR   | 693_selected_genes |
| chr5  | 98192058  | 98192454  | CHD1   | 693_selected_genes |
| chr5  | 98193858  | 98194119  | CHD1   | 693_selected_genes |
| chr5  | 98194642  | 98194744  | CHD1   | 693_selected_genes |
| chr5  | 98195650  | 98195797  | CHD1   | 693_selected_genes |
| chr5  | 98199086  | 98199315  | CHD1   | 693_selected_genes |
| chr5  | 98204173  | 98204364  | CHD1   | 693_selected_genes |
| chr5  | 98205432  | 98205611  | CHD1   | 693_selected_genes |
| chr5  | 98206365  | 98206532  | CHD1   | 693_selected_genes |
| chr5  | 98207729  | 98207930  | CHD1   | 693_selected_genes |
| chr5  | 98208095  | 98208284  | CHD1   | 693_selected_genes |
| chr5  | 98209271  | 98209452  | CHD1   | 693_selected_genes |
| chr5  | 98210750  | 98210842  | CHD1   | 693_selected_genes |
| chr5  | 98212076  | 98212287  | CHD1   | 693_selected_genes |
| chr5  | 98215230  | 98215457  | CHD1   | 693_selected_genes |
| chr5  | 98216754  | 98216900  | CHD1   | 693_selected_genes |
| chr5  | 98216957  | 98217104  | CHD1   | 693_selected_genes |
| chr5  | 98217653  | 98217852  | CHD1   | 693_selected_genes |
| chr5  | 98218766  | 98218966  | CHD1   | 693_selected_genes |
| chr5  | 98221256  | 98221378  | CHD1   | 693_selected_genes |
| chr5  | 98223766  | 98223969  | CHD1   | 693_selected_genes |
| chr5  | 98224754  | 98224967  | CHD1   | 693_selected_genes |
| chr5  | 98228203  | 98228442  | CHD1   | 693_selected_genes |
| chr5  | 98229094  | 98229335  | CHD1   | 693_selected_genes |
| chr5  | 98230275  | 98230415  | CHD1   | 693_selected_genes |
| chr5  | 98231904  | 98232171  | CHD1   | 693_selected_genes |
| chr5  | 98232871  | 98233049  | CHD1   | 693_selected_genes |
| chr5  | 98233934  | 98234163  | CHD1   | 693_selected_genes |
| chr5  | 98234342  | 98234493  | CHD1   | 693_selected_genes |
| chr5  | 98235158  | 98235434  | CHD1   | 693_selected_genes |
| chr5  | 98236489  | 98236811  | CHD1   | 693_selected_genes |
| chr5  | 98236864  | 98237064  | CHD1   | 693_selected_genes |
| chr5  | 98238578  | 98238693  | CHD1   | 693_selected_genes |
| chr5  | 98239470  | 98239637  | CHD1   | 693_selected_genes |
| chr5  | 98240575  | 98240827  | CHD1   | 693_selected_genes |
| chr5  | 98262012  | 98262115  | CHD1   | 693_selected_genes |
| chr11 | 128564128 | 128564196 | FLI1   | 693_selected_genes |
| chr11 | 128627984 | 128628246 | FLI1   | 693_selected_genes |
| chr11 | 128634520 | 128634589 | FLI1   | 693_selected_genes |
| chr11 | 128634659 | 128634741 | FLI1   | 693_selected_genes |
| chr11 | 128637987 | 128638192 | FLI1   | 693_selected_genes |
| chr11 | 128642651 | 128642905 | FLI1   | 693_selected_genes |
| chr11 | 128651827 | 128651943 | FLI1   | 693_selected_genes |
| chr11 | 128675235 | 128675351 | FLI1   | 693_selected_genes |
| chr11 | 128677049 | 128677159 | FLI1   | 693_selected_genes |
| chr11 | 128679026 | 128679124 | FLI1   | 693_selected_genes |
| chr11 | 128680328 | 128680908 | FLI1   | 693_selected_genes |
| chr2  | 176994466 | 176994527 | HOXD8  | 693_selected_genes |
| chr2  | 176995069 | 176995696 | HOXD8  | 693_selected_genes |
| chr2  | 176996019 | 176996365 | HOXD8  | 693_selected_genes |
| chrX  | 107975775 | 107979599 | IRS4   | 693_selected_genes |
| chr1  | 11734806  | 11734898  | MAD2L2 | 693_selected_genes |
| chr1  | 11735113  | 11735256  | MAD2L2 | 693_selected_genes |
| chr1  | 11735687  | 11735813  | MAD2L2 | 693_selected_genes |
| chr1  | 11735901  | 11736222  | MAD2L2 | 693_selected_genes |
| chr1  | 11736840  | 11737030  | MAD2L2 | 693_selected_genes |
| chr1  | 11737487  | 11737696  | MAD2L2 | 693_selected_genes |
| chr1  | 11740384  | 11740683  | MAD2L2 | 693_selected_genes |
| chr8  | 23538708  | 23539177  | NKX3-1 | 693_selected_genes |
| chr8  | 23540091  | 23540427  | NKX3-1 | 693_selected_genes |
| chr8  | 68864604  | 68864795  | PREX2  | 693_selected_genes |
| chr8  | 68930055  | 68930177  | PREX2  | 693_selected_genes |
| chr8  | 68931758  | 68931931  | PREX2  | 693_selected_genes |
| chr8  | 68934245  | 68934400  | PREX2  | 693_selected_genes |
| chr8  | 68939431  | 68939583  | PREX2  | 693_selected_genes |
| chr8  | 68942706  | 68942918  | PREX2  | 693_selected_genes |
| chr8  | 68950368  | 68950552  | PREX2  | 693_selected_genes |
| chr8  | 68956696  | 68956850  | PREX2  | 693_selected_genes |
| chr8  | 68965306  | 68965506  | PREX2  | 693_selected_genes |
| chr8  | 68968039  | 68968234  | PREX2  | 693_selected_genes |
| chr8  | 68972888  | 68973039  | PREX2  | 693_selected_genes |
| chr8  | 68981242  | 68981396  | PREX2  | 693_selected_genes |
| chr8  | 68982044  | 68982144  | PREX2  | 693_selected_genes |
| chr8  | 68984704  | 68984830  | PREX2  | 693_selected_genes |
| chr8  | 68989606  | 68989729  | PREX2  | 693_selected_genes |
| chr8  | 68992652  | 68992845  | PREX2  | 693_selected_genes |
| chr8  | 68992955  | 68993098  | PREX2  | 693_selected_genes |
| chr8  | 68995449  | 68995648  | PREX2  | 693_selected_genes |
| chr8  | 68999933  | 69000069  | PREX2  | 693_selected_genes |
| chr8  | 69002788  | 69002975  | PREX2  | 693_selected_genes |
| chr8  | 69005814  | 69005982  | PREX2  | 693_selected_genes |
| chr8  | 69009226  | 69009461  | PREX2  | 693_selected_genes |

|       |           |           |        |                    |
|-------|-----------|-----------|--------|--------------------|
| chr8  | 69011891  | 69012103  | PREX2  | 693_selected_genes |
| chr8  | 69017347  | 69017622  | PREX2  | 693_selected_genes |
| chr8  | 69020318  | 69020591  | PREX2  | 693_selected_genes |
| chr8  | 69021625  | 69021883  | PREX2  | 693_selected_genes |
| chr8  | 69023141  | 69023195  | PREX2  | 693_selected_genes |
| chr8  | 69027962  | 69028192  | PREX2  | 693_selected_genes |
| chr8  | 69030759  | 69030904  | PREX2  | 693_selected_genes |
| chr8  | 69031641  | 69031774  | PREX2  | 693_selected_genes |
| chr8  | 69032405  | 69032546  | PREX2  | 693_selected_genes |
| chr8  | 69033130  | 69033309  | PREX2  | 693_selected_genes |
| chr8  | 69039587  | 69039679  | PREX2  | 693_selected_genes |
| chr8  | 69046268  | 69046536  | PREX2  | 693_selected_genes |
| chr8  | 69050624  | 69050777  | PREX2  | 693_selected_genes |
| chr8  | 69058418  | 69058612  | PREX2  | 693_selected_genes |
| chr8  | 69069531  | 69069696  | PREX2  | 693_selected_genes |
| chr8  | 69103931  | 69104048  | PREX2  | 693_selected_genes |
| chr8  | 69104544  | 69104785  | PREX2  | 693_selected_genes |
| chr8  | 69129825  | 69129978  | PREX2  | 693_selected_genes |
| chr8  | 69132385  | 69132546  | PREX2  | 693_selected_genes |
| chr8  | 69136768  | 69136886  | PREX2  | 693_selected_genes |
| chr8  | 69143542  | 69143638  | PREX2  | 693_selected_genes |
| chr16 | 3632317   | 3632719   | SLX4   | 693_selected_genes |
| chr16 | 3633072   | 3633536   | SLX4   | 693_selected_genes |
| chr16 | 3634744   | 3634897   | SLX4   | 693_selected_genes |
| chr16 | 3638977   | 3641336   | SLX4   | 693_selected_genes |
| chr16 | 3642674   | 3642891   | SLX4   | 693_selected_genes |
| chr16 | 3644428   | 3644625   | SLX4   | 693_selected_genes |
| chr16 | 3645580   | 3645719   | SLX4   | 693_selected_genes |
| chr16 | 3646128   | 3646419   | SLX4   | 693_selected_genes |
| chr16 | 3647354   | 3647721   | SLX4   | 693_selected_genes |
| chr16 | 3647772   | 3648025   | SLX4   | 693_selected_genes |
| chr16 | 3650954   | 3651217   | SLX4   | 693_selected_genes |
| chr16 | 3652093   | 3652333   | SLX4   | 693_selected_genes |
| chr16 | 3656449   | 3656724   | SLX4   | 693_selected_genes |
| chr16 | 3658405   | 3658990   | SLX4   | 693_selected_genes |
| chr2  | 139307761 | 139307889 | SPOPL  | 693_selected_genes |
| chr2  | 139308027 | 139308199 | SPOPL  | 693_selected_genes |
| chr2  | 139308447 | 139308649 | SPOPL  | 693_selected_genes |
| chr2  | 139310098 | 139310276 | SPOPL  | 693_selected_genes |
| chr2  | 139311983 | 139312126 | SPOPL  | 693_selected_genes |
| chr2  | 139316566 | 139316794 | SPOPL  | 693_selected_genes |
| chr2  | 139316826 | 139316932 | SPOPL  | 693_selected_genes |
| chr2  | 139318349 | 139318522 | SPOPL  | 693_selected_genes |
| chr2  | 139322252 | 139322445 | SPOPL  | 693_selected_genes |
| chr2  | 139322484 | 139322588 | SPOPL  | 693_selected_genes |
| chr2  | 139326480 | 139326675 | SPOPL  | 693_selected_genes |
| chr6  | 31939748  | 31940018  | STK19  | 693_selected_genes |
| chr6  | 31940053  | 31940313  | STK19  | 693_selected_genes |
| chr6  | 31940372  | 31940559  | STK19  | 693_selected_genes |
| chr6  | 31946654  | 31946812  | STK19  | 693_selected_genes |
| chr6  | 31947165  | 31947355  | STK19  | 693_selected_genes |
| chr6  | 31948202  | 31948350  | STK19  | 693_selected_genes |
| chr6  | 31948405  | 31948603  | STK19  | 693_selected_genes |
| chr6  | 31948755  | 31948851  | STK19  | 693_selected_genes |
| chr6  | 31981492  | 31981589  | STK19  | 693_selected_genes |
| chr7  | 23749879  | 23749979  | STK31  | 693_selected_genes |
| chr7  | 23751692  | 23751789  | STK31  | 693_selected_genes |
| chr7  | 23751827  | 23751930  | STK31  | 693_selected_genes |
| chr7  | 23757074  | 23757223  | STK31  | 693_selected_genes |
| chr7  | 23766834  | 23766959  | STK31  | 693_selected_genes |
| chr7  | 23768682  | 23768893  | STK31  | 693_selected_genes |
| chr7  | 23775131  | 23775540  | STK31  | 693_selected_genes |
| chr7  | 23776497  | 23776722  | STK31  | 693_selected_genes |
| chr7  | 23792310  | 23792476  | STK31  | 693_selected_genes |
| chr7  | 23793908  | 23794118  | STK31  | 693_selected_genes |
| chr7  | 23802394  | 23802567  | STK31  | 693_selected_genes |
| chr7  | 23808588  | 23808818  | STK31  | 693_selected_genes |
| chr7  | 23809233  | 23809400  | STK31  | 693_selected_genes |
| chr7  | 23810598  | 23810768  | STK31  | 693_selected_genes |
| chr7  | 23811740  | 23811922  | STK31  | 693_selected_genes |
| chr7  | 23821012  | 23821164  | STK31  | 693_selected_genes |
| chr7  | 23823176  | 23823307  | STK31  | 693_selected_genes |
| chr7  | 23825071  | 23825247  | STK31  | 693_selected_genes |
| chr7  | 23826101  | 23826277  | STK31  | 693_selected_genes |
| chr7  | 23826431  | 23826568  | STK31  | 693_selected_genes |
| chr7  | 23827573  | 23827773  | STK31  | 693_selected_genes |
| chr7  | 23830417  | 23830590  | STK31  | 693_selected_genes |
| chr7  | 23854737  | 23854856  | STK31  | 693_selected_genes |
| chr7  | 23871729  | 23872010  | STK31  | 693_selected_genes |
| chr19 | 59055477  | 59055603  | TRIM28 | 693_selected_genes |
| chr19 | 59056099  | 59056489  | TRIM28 | 693_selected_genes |
| chr19 | 59056766  | 59056929  | TRIM28 | 693_selected_genes |
| chr19 | 59057105  | 59057288  | TRIM28 | 693_selected_genes |
| chr19 | 59058717  | 59058903  | TRIM28 | 693_selected_genes |

|       |           |           |        |                    |
|-------|-----------|-----------|--------|--------------------|
| chr19 | 59058938  | 59059105  | TRIM28 | 693_selected_genes |
| chr19 | 59059133  | 59059298  | TRIM28 | 693_selected_genes |
| chr19 | 59059375  | 59059572  | TRIM28 | 693_selected_genes |
| chr19 | 59059635  | 59059800  | TRIM28 | 693_selected_genes |
| chr19 | 59059827  | 59059984  | TRIM28 | 693_selected_genes |
| chr19 | 59060081  | 59060168  | TRIM28 | 693_selected_genes |
| chr19 | 59060203  | 59060302  | TRIM28 | 693_selected_genes |
| chr19 | 59060329  | 59060632  | TRIM28 | 693_selected_genes |
| chr19 | 59060672  | 59061042  | TRIM28 | 693_selected_genes |
| chr19 | 59061078  | 59061252  | TRIM28 | 693_selected_genes |
| chr19 | 59061290  | 59061427  | TRIM28 | 693_selected_genes |
| chr19 | 59061488  | 59061676  | TRIM28 | 693_selected_genes |
| chr19 | 59061718  | 59061945  | TRIM28 | 693_selected_genes |
| chr1  | 202300937 | 202301113 | UBE2T  | 693_selected_genes |
| chr1  | 202302112 | 202302246 | UBE2T  | 693_selected_genes |
| chr1  | 202302339 | 202302488 | UBE2T  | 693_selected_genes |
| chr1  | 202302552 | 202302708 | UBE2T  | 693_selected_genes |
| chr1  | 202304091 | 202304211 | UBE2T  | 693_selected_genes |
| chr1  | 202304744 | 202304907 | UBE2T  | 693_selected_genes |
| chrY  | 6734088   | 6734144   | AMELY  | CNV_SNPs           |
| chrY  | 6736052   | 6736528   | AMELY  | CNV_SNPs           |
| chrY  | 6736747   | 6736842   | AMELY  | CNV_SNPs           |
| chrY  | 6736883   | 6736975   | AMELY  | CNV_SNPs           |
| chrY  | 6738021   | 6738119   | AMELY  | CNV_SNPs           |
| chrY  | 6740570   | 6740674   | AMELY  | CNV_SNPs           |
| chrY  | 25276401  | 25276528  | DAZ1   | CNV_SNPs           |
| chrY  | 25281331  | 25281445  | DAZ1   | CNV_SNPs           |
| chrY  | 25285968  | 25286053  | DAZ1   | CNV_SNPs           |
| chrY  | 25286747  | 25286869  | DAZ1   | CNV_SNPs           |
| chrY  | 25289132  | 25289254  | DAZ1   | CNV_SNPs           |
| chrY  | 25298918  | 25299040  | DAZ1   | CNV_SNPs           |
| chrY  | 25301295  | 25301417  | DAZ1   | CNV_SNPs           |
| chrY  | 25303691  | 25303813  | DAZ1   | CNV_SNPs           |
| chrY  | 25306074  | 25306196  | DAZ1   | CNV_SNPs           |
| chrY  | 25308470  | 25308592  | DAZ1   | CNV_SNPs           |
| chrY  | 25310861  | 25310983  | DAZ1   | CNV_SNPs           |
| chrY  | 25313306  | 25313428  | DAZ1   | CNV_SNPs           |
| chrY  | 25314778  | 25314968  | DAZ1   | CNV_SNPs           |
| chrY  | 25315007  | 25315121  | DAZ1   | CNV_SNPs           |
| chrY  | 25315507  | 25315609  | DAZ1   | CNV_SNPs           |
| chrY  | 25316119  | 25316261  | DAZ1   | CNV_SNPs           |
| chrY  | 25316485  | 25316682  | DAZ1   | CNV_SNPs           |
| chrY  | 25325618  | 25325808  | DAZ1   | CNV_SNPs           |
| chrY  | 25325847  | 25325961  | DAZ1   | CNV_SNPs           |
| chrY  | 25326347  | 25326449  | DAZ1   | CNV_SNPs           |
| chrY  | 25326959  | 25327101  | DAZ1   | CNV_SNPs           |
| chrY  | 25327325  | 25327522  | DAZ1   | CNV_SNPs           |
| chrY  | 25336466  | 25336656  | DAZ1   | CNV_SNPs           |
| chrY  | 25336695  | 25336809  | DAZ1   | CNV_SNPs           |
| chrY  | 25337195  | 25337297  | DAZ1   | CNV_SNPs           |
| chrY  | 25337807  | 25337949  | DAZ1   | CNV_SNPs           |
| chrY  | 25338173  | 25338370  | DAZ1   | CNV_SNPs           |
| chrY  | 25344919  | 25344972  | DAZ1   | CNV_SNPs           |
| chrY  | 21867855  | 21868256  | KDM5D  | CNV_SNPs           |
| chrY  | 21868301  | 21868551  | KDM5D  | CNV_SNPs           |
| chrY  | 21868654  | 21868774  | KDM5D  | CNV_SNPs           |
| chrY  | 21869007  | 21869657  | KDM5D  | CNV_SNPs           |
| chrY  | 21869794  | 21869982  | KDM5D  | CNV_SNPs           |
| chrY  | 21870104  | 21870334  | KDM5D  | CNV_SNPs           |
| chrY  | 21870735  | 21870924  | KDM5D  | CNV_SNPs           |
| chrY  | 21871311  | 21871720  | KDM5D  | CNV_SNPs           |
| chrY  | 21872236  | 21872383  | KDM5D  | CNV_SNPs           |
| chrY  | 21877212  | 21877410  | KDM5D  | CNV_SNPs           |
| chrY  | 21877475  | 21877650  | KDM5D  | CNV_SNPs           |
| chrY  | 21877683  | 21877915  | KDM5D  | CNV_SNPs           |
| chrY  | 21878139  | 21878384  | KDM5D  | CNV_SNPs           |
| chrY  | 21878456  | 21878626  | KDM5D  | CNV_SNPs           |
| chrY  | 21882732  | 21882945  | KDM5D  | CNV_SNPs           |
| chrY  | 21882990  | 21883222  | KDM5D  | CNV_SNPs           |
| chrY  | 21885201  | 21885344  | KDM5D  | CNV_SNPs           |
| chrY  | 21893632  | 21893841  | KDM5D  | CNV_SNPs           |
| chrY  | 21893906  | 21894076  | KDM5D  | CNV_SNPs           |
| chrY  | 21894444  | 21894653  | KDM5D  | CNV_SNPs           |
| chrY  | 21897212  | 21897408  | KDM5D  | CNV_SNPs           |
| chrY  | 21897481  | 21897661  | KDM5D  | CNV_SNPs           |
| chrY  | 21901388  | 21901573  | KDM5D  | CNV_SNPs           |
| chrY  | 21903178  | 21903399  | KDM5D  | CNV_SNPs           |
| chrY  | 21903595  | 21903768  | KDM5D  | CNV_SNPs           |
| chrY  | 21905022  | 21905150  | KDM5D  | CNV_SNPs           |
| chrY  | 21906245  | 21906445  | KDM5D  | CNV_SNPs           |
| chrY  | 7142328   | 7142544   | PRKY   | CNV_SNPs           |
| chrY  | 7171952   | 7172171   | PRKY   | CNV_SNPs           |
| chrY  | 7193921   | 7194235   | PRKY   | CNV_SNPs           |
| chrY  | 7209130   | 7209300   | PRKY   | CNV_SNPs           |

|       |           |           |            |         |
|-------|-----------|-----------|------------|---------|
| chrY  | 7224150   | 7224296   | PRKY       | CNV_SNP |
| chrY  | 7235371   | 7235440   | PRKY       | CNV_SNP |
| chrY  | 22918024  | 22918077  | RPS4Y2     | CNV_SNP |
| chrY  | 22918638  | 22918766  | RPS4Y2     | CNV_SNP |
| chrY  | 22921728  | 22921959  | RPS4Y2     | CNV_SNP |
| chrY  | 22923144  | 22923292  | RPS4Y2     | CNV_SNP |
| chrY  | 22930665  | 22930887  | RPS4Y2     | CNV_SNP |
| chrY  | 22941369  | 22941577  | RPS4Y2     | CNV_SNP |
| chrY  | 22942791  | 22942943  | RPS4Y2     | CNV_SNP |
| chr17 | 45356535  | 45356586  | rs1000232  | CNV_SNP |
| chr4  | 120259187 | 120259238 | rs10004114 | CNV_SNP |
| chr4  | 62707627  | 62707678  | rs10021694 | CNV_SNP |
| chr15 | 38456835  | 38456886  | rs1003179  | CNV_SNP |
| chr5  | 112675998 | 112676049 | rs10067046 | CNV_SNP |
| chr5  | 154504876 | 154504927 | rs10078699 | CNV_SNP |
| chr17 | 64938316  | 64938367  | rs1008365  | CNV_SNP |
| chr8  | 11268051  | 11268102  | rs10094320 | CNV_SNP |
| chr8  | 98381999  | 98382050  | rs10097828 | CNV_SNP |
| chr8  | 18464904  | 18464955  | rs10102929 | CNV_SNP |
| chr8  | 38858405  | 38858456  | rs10106085 | CNV_SNP |
| chr9  | 84386686  | 84386737  | rs1010745  | CNV_SNP |
| chr9  | 32890562  | 32890613  | rs10123304 | CNV_SNP |
| chr14 | 50551008  | 50551059  | rs10140137 | CNV_SNP |
| chr14 | 81376464  | 81376515  | rs10142753 | CNV_SNP |
| chr14 | 22395224  | 22395275  | rs10150202 | CNV_SNP |
| chr4  | 165697014 | 165697065 | rs10155303 | CNV_SNP |
| chr10 | 15009342  | 15009393  | rs10159658 | CNV_SNP |
| chr15 | 26216344  | 26216395  | rs10162861 | CNV_SNP |
| chr2  | 4901077   | 4901128   | rs10174397 | CNV_SNP |
| chr2  | 46128432  | 46128483  | rs10187908 | CNV_SNP |
| chrX  | 132127819 | 132127870 | rs1018794  | CNV_SNP |
| chr2  | 152156232 | 152156283 | rs10203366 | CNV_SNP |
| chr7  | 82956863  | 82956914  | rs10226944 | CNV_SNP |
| chr7  | 82948568  | 82948619  | rs10230672 | CNV_SNP |
| chr7  | 85608081  | 85608132  | rs10231971 | CNV_SNP |
| chr7  | 103122619 | 103122670 | rs10233848 | CNV_SNP |
| chr7  | 22987474  | 22987525  | rs10253228 | CNV_SNP |
| chr9  | 87315091  | 87315142  | rs1025743  | CNV_SNP |
| chr18 | 31418105  | 31418156  | rs1026257  | CNV_SNP |
| chr14 | 98829979  | 98830030  | rs1026504  | CNV_SNP |
| chrX  | 15172163  | 15172214  | rs1031914  | CNV_SNP |
| chr15 | 99861592  | 99861643  | rs1033035  | CNV_SNP |
| chr7  | 97793183  | 97793234  | rs1039057  | CNV_SNP |
| chr6  | 134758287 | 134758338 | rs1040636  | CNV_SNP |
| chr19 | 36833772  | 36833823  | rs10418925 | CNV_SNP |
| chr3  | 156952168 | 156952219 | rs10451916 | CNV_SNP |
| chr14 | 75322301  | 75322352  | rs10483863 | CNV_SNP |
| chr7  | 52528962  | 52529013  | rs10488329 | CNV_SNP |
| chr1  | 157550040 | 157550091 | rs10489673 | CNV_SNP |
| chr8  | 4166400   | 4166451   | rs10503249 | CNV_SNP |
| chr8  | 18100729  | 18100780  | rs10503610 | CNV_SNP |
| chr9  | 107040687 | 107040738 | rs10512324 | CNV_SNP |
| chr9  | 119905343 | 119905394 | rs10513286 | CNV_SNP |
| chr4  | 105135417 | 105135468 | rs10516507 | CNV_SNP |
| chr15 | 88126103  | 88126154  | rs10520660 | CNV_SNP |
| chr10 | 3097186   | 3097237   | rs10732921 | CNV_SNP |
| chr11 | 35242881  | 35242932  | rs10734436 | CNV_SNP |
| chr10 | 68050495  | 68050546  | rs10740230 | CNV_SNP |
| chr11 | 18586096  | 18586147  | rs10741747 | CNV_SNP |
| chr12 | 53130318  | 53130369  | rs10747645 | CNV_SNP |
| chr10 | 122302216 | 122302267 | rs10749377 | CNV_SNP |
| chr11 | 110097785 | 110097836 | rs10749957 | CNV_SNP |
| chr1  | 175869528 | 175869579 | rs10753110 | CNV_SNP |
| chr2  | 204836572 | 204836623 | rs1075547  | CNV_SNP |
| chr12 | 18398210  | 18398261  | rs10770329 | CNV_SNP |
| chr12 | 18407048  | 18407099  | rs10770338 | CNV_SNP |
| chr12 | 13685790  | 13685841  | rs10772690 | CNV_SNP |
| chr17 | 13964718  | 13964769  | rs10775377 | CNV_SNP |
| chr18 | 26620793  | 26620844  | rs10775524 | CNV_SNP |
| chr12 | 106214267 | 106214318 | rs10778450 | CNV_SNP |
| chr1  | 96258899  | 96258950  | rs10783020 | CNV_SNP |
| chr12 | 55215288  | 55215339  | rs10783669 | CNV_SNP |
| chr12 | 60263200  | 60263251  | rs10784009 | CNV_SNP |
| chr11 | 121779441 | 121779492 | rs1078402  | CNV_SNP |
| chr1  | 152330919 | 152330970 | rs10788835 | CNV_SNP |
| chr1  | 20541344  | 20541395  | rs10799615 | CNV_SNP |
| chr1  | 169431337 | 169431388 | rs10800447 | CNV_SNP |
| chr1  | 188746948 | 188746999 | rs10800595 | CNV_SNP |
| chr1  | 240683463 | 240683514 | rs10802883 | CNV_SNP |
| chr2  | 208230117 | 208230168 | rs10804160 | CNV_SNP |
| chr7  | 1672514   | 1672565   | rs10807969 | CNV_SNP |
| chr9  | 18995124  | 18995175  | rs10811085 | CNV_SNP |
| chr9  | 28966272  | 28966323  | rs10812896 | CNV_SNP |
| chr9  | 4110921   | 4110972   | rs10814848 | CNV_SNP |

|       |           |           |            |          |
|-------|-----------|-----------|------------|----------|
| chr9  | 126974778 | 126974829 | rs10818929 | CNV_SNPs |
| chr10 | 34717570  | 34717621  | rs10827368 | CNV_SNPs |
| chr11 | 15511564  | 15511615  | rs10832446 | CNV_SNPs |
| chr11 | 23122578  | 23122629  | rs10833939 | CNV_SNPs |
| chr12 | 20290641  | 20290692  | rs10841451 | CNV_SNPs |
| chr12 | 11664152  | 11664203  | rs10845372 | CNV_SNPs |
| chr12 | 4947306   | 4947357   | rs10849154 | CNV_SNPs |
| chr12 | 93919271  | 93919322  | rs10859505 | CNV_SNPs |
| chr12 | 93919415  | 93919466  | rs10859508 | CNV_SNPs |
| chr12 | 107194750 | 107194801 | rs10861667 | CNV_SNPs |
| chr2  | 25100712  | 25100763  | rs10865315 | CNV_SNPs |
| chr3  | 36109749  | 36109800  | rs10865869 | CNV_SNPs |
| chr14 | 38345823  | 38345874  | rs10872905 | CNV_SNPs |
| chr14 | 48351596  | 48351647  | rs10873015 | CNV_SNPs |
| chr12 | 68307496  | 68307547  | rs10878697 | CNV_SNPs |
| chr12 | 46516103  | 46516154  | rs10880923 | CNV_SNPs |
| chr11 | 111273660 | 111273711 | rs10891259 | CNV_SNPs |
| chr11 | 131904835 | 131904886 | rs10894489 | CNV_SNPs |
| chr11 | 62789105  | 62789156  | rs10897315 | CNV_SNPs |
| chr11 | 74401737  | 74401788  | rs10899035 | CNV_SNPs |
| chr10 | 128270673 | 128270724 | rs10901638 | CNV_SNPs |
| chr10 | 1510021   | 1510072   | rs10903464 | CNV_SNPs |
| chr9  | 92495050  | 92495101  | rs10908943 | CNV_SNPs |
| chr1  | 184327230 | 184327281 | rs10911580 | CNV_SNPs |
| chr1  | 169022877 | 169022928 | rs10919044 | CNV_SNPs |
| chr1  | 245977970 | 245978021 | rs10924340 | CNV_SNPs |
| chr9  | 35208119  | 35208170  | rs10972381 | CNV_SNPs |
| chr11 | 39894347  | 39894398  | rs11035554 | CNV_SNPs |
| chr12 | 117838903 | 117838954 | rs11068469 | CNV_SNPs |
| chr15 | 63766650  | 63766701  | rs11071752 | CNV_SNPs |
| chr15 | 95792247  | 95792298  | rs11073424 | CNV_SNPs |
| chr16 | 89877949  | 89878000  | rs11076631 | CNV_SNPs |
| chr17 | 68921014  | 68921065  | rs11077530 | CNV_SNPs |
| chr17 | 80782983  | 80783034  | rs11078015 | CNV_SNPs |
| chr17 | 58206113  | 58206164  | rs11079395 | CNV_SNPs |
| chr17 | 50802481  | 50802532  | rs11080015 | CNV_SNPs |
| chr18 | 30089452  | 30089503  | rs11081772 | CNV_SNPs |
| chr18 | 46385265  | 46385316  | rs11082713 | CNV_SNPs |
| chr21 | 17798934  | 17798985  | rs11088585 | CNV_SNPs |
| chrX  | 92181881  | 92181932  | rs11091840 | CNV_SNPs |
| chr2  | 21058238  | 21058289  | rs11096687 | CNV_SNPs |
| chr9  | 138663770 | 138663821 | rs11103182 | CNV_SNPs |
| chr9  | 138829683 | 138829734 | rs11103233 | CNV_SNPs |
| chr12 | 91237894  | 91237945  | rs11105839 | CNV_SNPs |
| chr2  | 79227624  | 79227675  | rs11126691 | CNV_SNPs |
| chr3  | 17744184  | 17744235  | rs11128848 | CNV_SNPs |
| chr3  | 29047647  | 29047698  | rs11129341 | CNV_SNPs |
| chr3  | 29250670  | 29250721  | rs11129353 | CNV_SNPs |
| chr3  | 43176994  | 43177045  | rs11129993 | CNV_SNPs |
| chr16 | 79109909  | 79109960  | rs11150134 | CNV_SNPs |
| chr18 | 71915647  | 71915698  | rs11151937 | CNV_SNPs |
| chr14 | 21337240  | 21337291  | rs11156730 | CNV_SNPs |
| chr1  | 75413596  | 75413647  | rs11162256 | CNV_SNPs |
| chr1  | 82939511  | 82939562  | rs11163482 | CNV_SNPs |
| chr12 | 62755605  | 62755656  | rs11174442 | CNV_SNPs |
| chr10 | 98403520  | 98403571  | rs11188870 | CNV_SNPs |
| chr1  | 66372880  | 66372931  | rs11208766 | CNV_SNPs |
| chr11 | 113282269 | 113282320 | rs1124493  | CNV_SNPs |
| chr15 | 99856823  | 99856874  | rs11247079 | CNV_SNPs |
| chr8  | 11587208  | 11587259  | rs11250159 | CNV_SNPs |
| chr10 | 29965785  | 29965836  | rs1148210  | CNV_SNPs |
| chr3  | 25569539  | 25569590  | rs1153600  | CNV_SNPs |
| chr1  | 209632537 | 209632588 | rs1156784  | CNV_SNPs |
| chr1  | 162831291 | 162831342 | rs11588419 | CNV_SNPs |
| chr10 | 49977720  | 49977771  | rs11598212 | CNV_SNPs |
| chr11 | 69069512  | 69069563  | rs11601693 | CNV_SNPs |
| chr12 | 97487805  | 97487856  | rs11612664 | CNV_SNPs |
| chr15 | 36872472  | 36872523  | rs11638468 | CNV_SNPs |
| chr15 | 98674831  | 98674882  | rs11639134 | CNV_SNPs |
| chr17 | 8383173   | 8383224   | rs11651129 | CNV_SNPs |
| chr6  | 25795551  | 25795602  | rs1165155  | CNV_SNPs |
| chr18 | 74387273  | 74387324  | rs11660099 | CNV_SNPs |
| chr18 | 53631016  | 53631067  | rs11663406 | CNV_SNPs |
| chr19 | 15890491  | 15890542  | rs11669449 | CNV_SNPs |
| chr2  | 100801172 | 100801223 | rs11677053 | CNV_SNPs |
| chr2  | 55687592  | 55687643  | rs11694644 | CNV_SNPs |
| chr20 | 35478116  | 35478167  | rs11697412 | CNV_SNPs |
| chr20 | 59927979  | 59928030  | rs11698886 | CNV_SNPs |
| chr3  | 156800358 | 156800409 | rs11712937 | CNV_SNPs |
| chr4  | 136777663 | 136777714 | rs11723866 | CNV_SNPs |
| chr4  | 6113533   | 6113584   | rs11731332 | CNV_SNPs |
| chr4  | 134635916 | 134635967 | rs11735128 | CNV_SNPs |
| chr5  | 150777971 | 150778022 | rs11740475 | CNV_SNPs |
| chr5  | 178996409 | 178996460 | rs11743261 | CNV_SNPs |

|       |           |           |            |          |
|-------|-----------|-----------|------------|----------|
| chr5  | 52665273  | 52665324  | rs11747505 | CNV_SNPs |
| chr6  | 12518662  | 12518713  | rs11753185 | CNV_SNPs |
| chr7  | 139338107 | 139338158 | rs11761839 | CNV_SNPs |
| chr7  | 43288458  | 43288509  | rs11771692 | CNV_SNPs |
| chr8  | 10470889  | 10470940  | rs11773913 | CNV_SNPs |
| chr8  | 11096127  | 11096178  | rs11777002 | CNV_SNPs |
| chr7  | 18182729  | 18182780  | rs1178359  | CNV_SNPs |
| chr7  | 18171003  | 18171054  | rs1178370  | CNV_SNPs |
| chr10 | 110982677 | 110982728 | rs11815325 | CNV_SNPs |
| chr14 | 59556179  | 59556230  | rs11850859 | CNV_SNPs |
| chr15 | 78164680  | 78164731  | rs11857176 | CNV_SNPs |
| chr16 | 79167662  | 79167713  | rs11862384 | CNV_SNPs |
| chr2  | 193562182 | 193562233 | rs11887586 | CNV_SNPs |
| chr2  | 106021462 | 106021513 | rs11888592 | CNV_SNPs |
| chr2  | 125301476 | 125301527 | rs11890408 | CNV_SNPs |
| chr2  | 164133542 | 164133593 | rs11891934 | CNV_SNPs |
| chr2  | 7541743   | 7541794   | rs11897624 | CNV_SNPs |
| chr2  | 238791977 | 238792028 | rs11898345 | CNV_SNPs |
| chr2  | 28539851  | 28539902  | rs11902458 | CNV_SNPs |
| chr3  | 72323145  | 72323196  | rs11922110 | CNV_SNPs |
| chr4  | 28400357  | 28400408  | rs11938446 | CNV_SNPs |
| chr4  | 173704156 | 173704207 | rs11938551 | CNV_SNPs |
| chr5  | 150229775 | 150229826 | rs11949556 | CNV_SNPs |
| chr5  | 101265839 | 101265890 | rs11952711 | CNV_SNPs |
| chr5  | 40457433  | 40457484  | rs11955354 | CNV_SNPs |
| chr5  | 8453597   | 8453648   | rs11960788 | CNV_SNPs |
| chr8  | 120994368 | 120994419 | rs11984766 | CNV_SNPs |
| chr8  | 3176613   | 3176664   | rs11991912 | CNV_SNPs |
| chr8  | 66183840  | 66183891  | rs11998282 | CNV_SNPs |
| chr1  | 14192646  | 14192697  | rs1203659  | CNV_SNPs |
| chr11 | 110697279 | 110697330 | rs120434   | CNV_SNPs |
| chr1  | 35013560  | 35013611  | rs12136079 | CNV_SNPs |
| chr4  | 124344691 | 124344742 | rs12233855 | CNV_SNPs |
| chr1  | 230355412 | 230355463 | rs12403323 | CNV_SNPs |
| chr1  | 227596254 | 227596305 | rs12408981 | CNV_SNPs |
| chr15 | 94591006  | 94591057  | rs12437942 | CNV_SNPs |
| chr15 | 93545908  | 93545959  | rs12438635 | CNV_SNPs |
| chr15 | 54532114  | 54532165  | rs12441013 | CNV_SNPs |
| chr15 | 97476056  | 97476107  | rs12442455 | CNV_SNPs |
| chr2  | 133317863 | 133317914 | rs12463443 | CNV_SNPs |
| chr2  | 83593547  | 83593598  | rs12464446 | CNV_SNPs |
| chr2  | 79525007  | 79525058  | rs12465102 | CNV_SNPs |
| chr2  | 216768813 | 216768864 | rs12465204 | CNV_SNPs |
| chr2  | 76787898  | 76787949  | rs12477610 | CNV_SNPs |
| chr3  | 26806082  | 26806133  | rs12493081 | CNV_SNPs |
| chr3  | 94429146  | 94429197  | rs12497253 | CNV_SNPs |
| chr3  | 76716768  | 76716819  | rs12497518 | CNV_SNPs |
| chr4  | 67840288  | 67840339  | rs12500111 | CNV_SNPs |
| chr4  | 130125280 | 130125331 | rs12502722 | CNV_SNPs |
| chr4  | 115456085 | 115456136 | rs12503437 | CNV_SNPs |
| chr5  | 4089175   | 4089226   | rs12513797 | CNV_SNPs |
| chr5  | 29954937  | 29954988  | rs12516563 | CNV_SNPs |
| chr5  | 14009059  | 14009110  | rs12517769 | CNV_SNPs |
| chr6  | 41311866  | 41311917  | rs12530182 | CNV_SNPs |
| chr7  | 158450939 | 158450990 | rs12533939 | CNV_SNPs |
| chr13 | 106236072 | 106236123 | rs1253820  | CNV_SNPs |
| chr8  | 5498385   | 5498436   | rs12541274 | CNV_SNPs |
| chr8  | 143486672 | 143486723 | rs12543849 | CNV_SNPs |
| chr8  | 13745562  | 13745613  | rs12544387 | CNV_SNPs |
| chr8  | 90282785  | 90282836  | rs12547059 | CNV_SNPs |
| chr8  | 125874933 | 125874984 | rs12549299 | CNV_SNPs |
| chr9  | 20776717  | 20776768  | rs12551126 | CNV_SNPs |
| chr15 | 26933202  | 26933253  | rs12593415 | CNV_SNPs |
| chr17 | 63314165  | 63314216  | rs12603034 | CNV_SNPs |
| chr18 | 31705588  | 31705639  | rs12605566 | CNV_SNPs |
| chr19 | 34115522  | 34115573  | rs12610868 | CNV_SNPs |
| chr2  | 226701382 | 226701433 | rs12612024 | CNV_SNPs |
| chr2  | 185198399 | 185198450 | rs12616371 | CNV_SNPs |
| chr4  | 29722971  | 29723022  | rs12641943 | CNV_SNPs |
| chr4  | 67191513  | 67191564  | rs12643470 | CNV_SNPs |
| chr4  | 155454261 | 155454312 | rs12649647 | CNV_SNPs |
| chr5  | 154936186 | 154936237 | rs12655584 | CNV_SNPs |
| chr5  | 4577816   | 4577867   | rs12657445 | CNV_SNPs |
| chr5  | 72671712  | 72671763  | rs12659148 | CNV_SNPs |
| chr7  | 67073991  | 67074042  | rs12667043 | CNV_SNPs |
| chr7  | 154594045 | 154594096 | rs12667380 | CNV_SNPs |
| chr7  | 2020969   | 2021020   | rs12668848 | CNV_SNPs |
| chr8  | 29496736  | 29496787  | rs12676327 | CNV_SNPs |
| chr8  | 3489730   | 3489781   | rs12678397 | CNV_SNPs |
| chr9  | 129469513 | 129469564 | rs12684797 | CNV_SNPs |
| chrX  | 39945599  | 39945650  | rs12687359 | CNV_SNPs |
| chr14 | 20347538  | 20347589  | rs1319954  | CNV_SNPs |
| chr13 | 43603845  | 43603896  | rs1323862  | CNV_SNPs |
| chr22 | 45134171  | 45134222  | rs132410   | CNV_SNPs |

|       |           |           |            |         |
|-------|-----------|-----------|------------|---------|
| chr1  | 102237792 | 102237843 | rs1327583  | CNV_SNP |
| chr13 | 68930959  | 68931010  | rs1329680  | CNV_SNP |
| chr9  | 122204778 | 122204829 | rs1331624  | CNV_SNP |
| chr22 | 25770764  | 25770815  | rs133216   | CNV_SNP |
| chr9  | 31112831  | 31112882  | rs1335143  | CNV_SNP |
| chr1  | 232455377 | 232455428 | rs1338519  | CNV_SNP |
| chr10 | 15950123  | 15950174  | rs1339474  | CNV_SNP |
| chr10 | 9959759   | 9959810   | rs1339673  | CNV_SNP |
| chr13 | 104378156 | 104378207 | rs1341438  | CNV_SNP |
| chr10 | 108316036 | 108316087 | rs1341675  | CNV_SNP |
| chr1  | 118346193 | 118346244 | rs1342813  | CNV_SNP |
| chr8  | 132408483 | 132408534 | rs1346820  | CNV_SNP |
| chr11 | 43266808  | 43266859  | rs1353461  | CNV_SNP |
| chr2  | 50178125  | 50178176  | rs1363046  | CNV_SNP |
| chr18 | 28787498  | 28787549  | rs1365294  | CNV_SNP |
| chr10 | 60277523  | 60277574  | rs1365740  | CNV_SNP |
| chr4  | 156646934 | 156646985 | rs1384623  | CNV_SNP |
| chr3  | 112547575 | 112547626 | rs1387024  | CNV_SNP |
| chr11 | 7206537   | 7206588   | rs1395907  | CNV_SNP |
| chr2  | 142098136 | 142098187 | rs1402473  | CNV_SNP |
| chr2  | 154688702 | 154688753 | rs1406084  | CNV_SNP |
| chr10 | 109599363 | 109599414 | rs1411289  | CNV_SNP |
| chr9  | 28385646  | 28385697  | rs1412227  | CNV_SNP |
| chr1  | 221345716 | 221345767 | rs1417922  | CNV_SNP |
| chr7  | 97097061  | 97097112  | rs1420175  | CNV_SNP |
| chr3  | 34786430  | 34786481  | rs1420518  | CNV_SNP |
| chr19 | 53812497  | 53812548  | rs1428642  | CNV_SNP |
| chr2  | 141599192 | 141599243 | rs1429369  | CNV_SNP |
| chr2  | 222202836 | 222202887 | rs1430230  | CNV_SNP |
| chr4  | 65604590  | 65604641  | rs1430526  | CNV_SNP |
| chr14 | 87813005  | 87813056  | rs1430564  | CNV_SNP |
| chr2  | 82017274  | 82017325  | rs1432154  | CNV_SNP |
| chr2  | 79422939  | 79422990  | rs1434199  | CNV_SNP |
| chr2  | 158739558 | 158739609 | rs1441136  | CNV_SNP |
| chr12 | 61873061  | 61873112  | rs1453703  | CNV_SNP |
| chr3  | 36515690  | 36515741  | rs1456078  | CNV_SNP |
| chr1  | 234272861 | 234272912 | rs1458590  | CNV_SNP |
| chr4  | 118610357 | 118610408 | rs1459551  | CNV_SNP |
| chr3  | 118605443 | 118605494 | rs1464413  | CNV_SNP |
| chr1  | 219421902 | 219421953 | rs1474372  | CNV_SNP |
| chr3  | 22112034  | 22112085  | rs1479996  | CNV_SNP |
| chrX  | 97019175  | 97019226  | rs1481156  | CNV_SNP |
| chr8  | 120071872 | 120071923 | rs1485315  | CNV_SNP |
| chr12 | 55427285  | 55427336  | rs1488049  | CNV_SNP |
| chr3  | 2001776   | 2001827   | rs1488745  | CNV_SNP |
| chr11 | 27795512  | 27795563  | rs1491868  | CNV_SNP |
| chr7  | 24164598  | 24164649  | rs1494188  | CNV_SNP |
| chr7  | 97826206  | 97826257  | rs1495525  | CNV_SNP |
| chr11 | 88359605  | 88359656  | rs1504081  | CNV_SNP |
| chr2  | 6851243   | 6851294   | rs1505696  | CNV_SNP |
| chr12 | 43131105  | 43131156  | rs1517662  | CNV_SNP |
| chr5  | 126841094 | 126841145 | rs151796   | CNV_SNP |
| chr4  | 157519070 | 157519121 | rs1521696  | CNV_SNP |
| chr7  | 16603634  | 16603685  | rs1524358  | CNV_SNP |
| chr12 | 77781845  | 77781896  | rs1527062  | CNV_SNP |
| chr2  | 183485132 | 183485183 | rs1527879  | CNV_SNP |
| chr16 | 31691886  | 31691937  | rs1528317  | CNV_SNP |
| chr1  | 118223958 | 118224009 | rs1529968  | CNV_SNP |
| chr2  | 120048703 | 120048754 | rs1530562  | CNV_SNP |
| chr7  | 121090833 | 121090884 | rs1534520  | CNV_SNP |
| chr6  | 76598878  | 76598929  | rs1535501  | CNV_SNP |
| chr6  | 72558554  | 72558605  | rs1536766  | CNV_SNP |
| chr11 | 20575761  | 20575812  | rs1540186  | CNV_SNP |
| chr6  | 32877147  | 32877198  | rs154989   | CNV_SNP |
| chr7  | 155835530 | 155835581 | rs1551634  | CNV_SNP |
| chr21 | 41918932  | 41918983  | rs1554936  | CNV_SNP |
| chr3  | 1449846   | 1449897   | rs155864   | CNV_SNP |
| chr5  | 139517022 | 139517073 | rs156095   | CNV_SNP |
| chr6  | 162170013 | 162170064 | rs1569836  | CNV_SNP |
| chr6  | 90009285  | 90009336  | rs1570932  | CNV_SNP |
| chr16 | 52085567  | 52085618  | rs1582317  | CNV_SNP |
| chr5  | 58205554  | 58205605  | rs159734   | CNV_SNP |
| chr10 | 18471935  | 18471986  | rs1624525  | CNV_SNP |
| chr7  | 87600900  | 87600951  | rs1637497  | CNV_SNP |
| chr15 | 45468600  | 45468651  | rs1648306  | CNV_SNP |
| chr22 | 21135737  | 21135788  | rs165583   | CNV_SNP |
| chr8  | 565206    | 565257    | rs1669694  | CNV_SNP |
| chr12 | 104975183 | 104975234 | rs167510   | CNV_SNP |
| chr10 | 29108029  | 29108080  | rs1691921  | CNV_SNP |
| chrY  | 19370890  | 19370941  | rs16980598 | CNV_SNP |
| chrX  | 32172558  | 32172609  | rs1718052  | CNV_SNP |
| chr1  | 7520103   | 7520154   | rs1725235  | CNV_SNP |
| chr2  | 34654103  | 34654154  | rs17260872 | CNV_SNP |
| chrX  | 93434409  | 93434460  | rs1736839  | CNV_SNP |

|       |           |           |           |         |
|-------|-----------|-----------|-----------|---------|
| chrX  | 73434921  | 73434972  | rs174211  | CNV_SNP |
| chr14 | 104540829 | 104540880 | rs1744266 | CNV_SNP |
| chr20 | 36971093  | 36971144  | rs1780615 | CNV_SNP |
| chr11 | 131050868 | 131050919 | rs1793609 | CNV_SNP |
| chr3  | 194238364 | 194238415 | rs1807193 | CNV_SNP |
| chr15 | 87255722  | 87255773  | rs1814089 | CNV_SNP |
| chr10 | 119379061 | 119379112 | rs181652  | CNV_SNP |
| chr12 | 65379347  | 65379398  | rs1822929 | CNV_SNP |
| chr2  | 14527990  | 14528041  | rs1829065 | CNV_SNP |
| chr11 | 127795820 | 127795871 | rs1834311 | CNV_SNP |
| chr2  | 39842114  | 39842165  | rs1861242 | CNV_SNP |
| chr3  | 187304043 | 187304094 | rs1863384 | CNV_SNP |
| chr2  | 240678176 | 240678227 | rs1866136 | CNV_SNP |
| chr13 | 93770307  | 93770358  | rs1867437 | CNV_SNP |
| chr5  | 33817313  | 33817364  | rs1867718 | CNV_SNP |
| chr22 | 25494718  | 25494769  | rs1883278 | CNV_SNP |
| chr6  | 39338409  | 39338460  | rs1885615 | CNV_SNP |
| chr13 | 43549995  | 43550046  | rs1886152 | CNV_SNP |
| chr13 | 99566409  | 99566460  | rs1886551 | CNV_SNP |
| chr9  | 27687133  | 27687184  | rs1888171 | CNV_SNP |
| chr2  | 193538794 | 193538845 | rs1898917 | CNV_SNP |
| chrX  | 25314696  | 25314747  | rs1904925 | CNV_SNP |
| chr3  | 61187171  | 61187222  | rs1916800 | CNV_SNP |
| chr4  | 28143831  | 28143882  | rs1918319 | CNV_SNP |
| chr7  | 78902658  | 78902709  | rs1918939 | CNV_SNP |
| chr13 | 46833124  | 46833175  | rs1926005 | CNV_SNP |
| chr6  | 82610162  | 82610213  | rs1931656 | CNV_SNP |
| chr11 | 132534844 | 132534895 | rs1939508 | CNV_SNP |
| chr11 | 121939950 | 121940001 | rs1944463 | CNV_SNP |
| chr6  | 82467081  | 82467132  | rs194609  | CNV_SNP |
| chr8  | 87558257  | 87558308  | rs1946940 | CNV_SNP |
| chr10 | 53238089  | 53238140  | rs1947060 | CNV_SNP |
| chr14 | 49557420  | 49557471  | rs1950605 | CNV_SNP |
| chr14 | 27035086  | 27035137  | rs1951073 | CNV_SNP |
| chr14 | 83401732  | 83401783  | rs1959730 | CNV_SNP |
| chr10 | 90918688  | 90918739  | rs1977501 | CNV_SNP |
| chr19 | 17193525  | 17193576  | rs1979260 | CNV_SNP |
| chr16 | 2781817   | 2781868   | rs1981539 | CNV_SNP |
| chr12 | 81163991  | 81164042  | rs1982909 | CNV_SNP |
| chr1  | 214977339 | 214977390 | rs1993032 | CNV_SNP |
| chr7  | 23293720  | 23293771  | rs199347  | CNV_SNP |
| chr15 | 71950445  | 71950496  | rs1995337 | CNV_SNP |
| chr4  | 157615557 | 157615608 | rs1996770 | CNV_SNP |
| chrX  | 93324954  | 93325005  | rs1999923 | CNV_SNP |
| chr20 | 51970935  | 51970986  | rs200630  | CNV_SNP |
| chr20 | 21116276  | 21116327  | rs2024937 | CNV_SNP |
| chr15 | 63054413  | 63054464  | rs2030040 | CNV_SNP |
| chr2  | 191869137 | 191869188 | rs2030171 | CNV_SNP |
| chr2  | 17675709  | 17675760  | rs2030328 | CNV_SNP |
| chr5  | 44273647  | 44273698  | rs2034347 | CNV_SNP |
| chr16 | 82113445  | 82113496  | rs2042429 | CNV_SNP |
| chr2  | 134775318 | 134775369 | rs2046475 | CNV_SNP |
| chr18 | 29691581  | 29691632  | rs2048245 | CNV_SNP |
| chr7  | 124270548 | 124270599 | rs2049438 | CNV_SNP |
| chr1  | 158507158 | 158507209 | rs2051068 | CNV_SNP |
| chr5  | 147496281 | 147496332 | rs2052532 | CNV_SNP |
| chr13 | 106826352 | 106826403 | rs2053530 | CNV_SNP |
| chr5  | 135406632 | 135406683 | rs2058043 | CNV_SNP |
| chrX  | 49070787  | 49070838  | rs2071317 | CNV_SNP |
| chr6  | 46910389  | 46910440  | rs2077055 | CNV_SNP |
| chr17 | 10552462  | 10552513  | rs2097657 | CNV_SNP |
| chr10 | 43052954  | 43053005  | rs210219  | CNV_SNP |
| chr18 | 10151862  | 10151913  | rs2110540 | CNV_SNP |
| chr3  | 188183906 | 188183957 | rs2114239 | CNV_SNP |
| chr3  | 60459175  | 60459226  | rs2121863 | CNV_SNP |
| chr3  | 6610042   | 6610093   | rs2129907 | CNV_SNP |
| chr17 | 6847047   | 6847098   | rs2135845 | CNV_SNP |
| chr7  | 144662648 | 144662699 | rs2140849 | CNV_SNP |
| chr1  | 35468403  | 35468454  | rs2151554 | CNV_SNP |
| chr4  | 15499225  | 15499276  | rs2160043 | CNV_SNP |
| chr9  | 125767514 | 125767565 | rs2167128 | CNV_SNP |
| chr12 | 62290630  | 62290681  | rs2168454 | CNV_SNP |
| chr5  | 137431475 | 137431526 | rs217256  | CNV_SNP |
| chr10 | 68821546  | 68821597  | rs2182161 | CNV_SNP |
| chr7  | 70859465  | 70859516  | rs2189930 | CNV_SNP |
| chr7  | 91179865  | 91179916  | rs2192804 | CNV_SNP |
| chr2  | 57016366  | 57016417  | rs2193624 | CNV_SNP |
| chr10 | 10923405  | 10923456  | rs2208952 | CNV_SNP |
| chr14 | 61884620  | 61884671  | rs2209388 | CNV_SNP |
| chr14 | 57141577  | 57141628  | rs2210034 | CNV_SNP |
| chr7  | 153622356 | 153622407 | rs2215195 | CNV_SNP |
| chr2  | 225069342 | 225069393 | rs2219088 | CNV_SNP |
| chrX  | 145961863 | 145961914 | rs2225832 | CNV_SNP |
| chr1  | 4849358   | 4849409   | rs2235438 | CNV_SNP |

|       |           |           |           |         |
|-------|-----------|-----------|-----------|---------|
| chr16 | 1601261   | 1601312   | rs2235646 | CNV_SNP |
| chr22 | 19053380  | 19053431  | rs2238749 | CNV_SNP |
| chr2  | 217736105 | 217736156 | rs2241191 | CNV_SNP |
| chr11 | 8852213   | 8852264   | rs2243566 | CNV_SNP |
| chr7  | 50739429  | 50739480  | rs2244353 | CNV_SNP |
| chr10 | 56851370  | 56851421  | rs2246693 | CNV_SNP |
| chr17 | 986716    | 986767    | rs2257468 | CNV_SNP |
| chr17 | 953430    | 953481    | rs2257540 | CNV_SNP |
| chr20 | 22964773  | 22964824  | rs2257766 | CNV_SNP |
| chr11 | 110665888 | 110665939 | rs226111  | CNV_SNP |
| chrX  | 132467697 | 132467748 | rs2266802 | CNV_SNP |
| chr22 | 44445633  | 44445684  | rs2267600 | CNV_SNP |
| chr3  | 39453031  | 39453082  | rs2269349 | CNV_SNP |
| chr1  | 172415425 | 172415476 | rs2269615 | CNV_SNP |
| chr5  | 161322863 | 161322914 | rs2279020 | CNV_SNP |
| chr11 | 2583115   | 2583166   | rs2283170 | CNV_SNP |
| chr19 | 58288143  | 58288194  | rs2285615 | CNV_SNP |
| chr17 | 74681409  | 74681460  | rs2286593 | CNV_SNP |
| chr17 | 30696266  | 30696317  | rs2286645 | CNV_SNP |
| chr18 | 43015506  | 43015557  | rs2287434 | CNV_SNP |
| chr18 | 42288451  | 42288502  | rs2290932 | CNV_SNP |
| chr2  | 179632684 | 179632735 | rs2291313 | CNV_SNP |
| chr9  | 421954    | 422005    | rs2297081 | CNV_SNP |
| chr5  | 21760576  | 21760627  | rs2303748 | CNV_SNP |
| chr13 | 67591701  | 67591752  | rs2325020 | CNV_SNP |
| chr7  | 45127256  | 45127307  | rs2331207 | CNV_SNP |
| chr21 | 28399156  | 28399207  | rs233621  | CNV_SNP |
| chr22 | 29413975  | 29414026  | rs2347790 | CNV_SNP |
| chr14 | 50455061  | 50455112  | rs2355654 | CNV_SNP |
| chr7  | 150486057 | 150486108 | rs2373852 | CNV_SNP |
| chr2  | 141641903 | 141641954 | rs2380943 | CNV_SNP |
| chr6  | 100315001 | 100315052 | rs2397660 | CNV_SNP |
| chr12 | 21591895  | 21591946  | rs2417982 | CNV_SNP |
| chr10 | 111500874 | 111500925 | rs2419304 | CNV_SNP |
| chr2  | 60170849  | 60170900  | rs2419407 | CNV_SNP |
| chr12 | 22968352  | 22968403  | rs2433651 | CNV_SNP |
| chrX  | 91420480  | 91420531  | rs2437447 | CNV_SNP |
| chr8  | 6327248   | 6327299   | rs2442496 | CNV_SNP |
| chr13 | 54073443  | 54073494  | rs2488375 | CNV_SNP |
| chr6  | 40588269  | 40588320  | rs2494971 | CNV_SNP |
| chr10 | 36854013  | 36854064  | rs2503069 | CNV_SNP |
| chr10 | 38372638  | 38372689  | rs2505257 | CNV_SNP |
| chr7  | 86544641  | 86544692  | rs2519713 | CNV_SNP |
| chr5  | 142329119 | 142329170 | rs252234  | CNV_SNP |
| chr2  | 159560022 | 159560073 | rs2528611 | CNV_SNP |
| chr6  | 31053231  | 31053282  | rs2535310 | CNV_SNP |
| chr5  | 53875455  | 53875506  | rs2548632 | CNV_SNP |
| chr11 | 35053791  | 35053842  | rs2553794 | CNV_SNP |
| chr13 | 33833784  | 33833835  | rs2555605 | CNV_SNP |
| chr5  | 162712711 | 162712762 | rs2560373 | CNV_SNP |
| chr2  | 85408525  | 85408576  | rs2568201 | CNV_SNP |
| chr18 | 55466570  | 55466621  | rs2571219 | CNV_SNP |
| chr8  | 59790184  | 59790235  | rs2594953 | CNV_SNP |
| chr3  | 12955956  | 12956007  | rs2596902 | CNV_SNP |
| chr11 | 68758483  | 68758534  | rs2602822 | CNV_SNP |
| chr12 | 78288785  | 78288836  | rs2619062 | CNV_SNP |
| chr17 | 4540251   | 4540302   | rs2619118 | CNV_SNP |
| chr11 | 19498834  | 19498885  | rs2632032 | CNV_SNP |
| chr8  | 131862793 | 131862844 | rs263240  | CNV_SNP |
| chr7  | 56749181  | 56749232  | rs2634103 | CNV_SNP |
| chr3  | 87348040  | 87348091  | rs2646218 | CNV_SNP |
| chr12 | 106589632 | 106589683 | rs2649712 | CNV_SNP |
| chr5  | 79172110  | 79172161  | rs265005  | CNV_SNP |
| chr11 | 99322295  | 99322346  | rs2656176 | CNV_SNP |
| chr6  | 122329241 | 122329292 | rs2679665 | CNV_SNP |
| chr8  | 103858282 | 103858333 | rs2679748 | CNV_SNP |
| chr3  | 24205225  | 24205276  | rs2683544 | CNV_SNP |
| chr6  | 122329944 | 122329995 | rs2684222 | CNV_SNP |
| chr9  | 114912591 | 114912642 | rs2691669 | CNV_SNP |
| chr10 | 71539555  | 71539606  | rs2704476 | CNV_SNP |
| chr1  | 70742037  | 70742088  | rs270487  | CNV_SNP |
| chr18 | 68060697  | 68060748  | rs2711419 | CNV_SNP |
| chr7  | 111820064 | 111820115 | rs2729544 | CNV_SNP |
| chr7  | 41461174  | 41461225  | rs273172  | CNV_SNP |
| chr19 | 51805292  | 51805343  | rs273628  | CNV_SNP |
| chr6  | 93108665  | 93108716  | rs2757027 | CNV_SNP |
| chr1  | 157599891 | 157599942 | rs2758629 | CNV_SNP |
| chr14 | 85173201  | 85173252  | rs2765909 | CNV_SNP |
| chr10 | 38542562  | 38542613  | rs2800485 | CNV_SNP |
| chr6  | 34617118  | 34617169  | rs2814992 | CNV_SNP |
| chr6  | 39190261  | 39190312  | rs2815118 | CNV_SNP |
| chr9  | 113560093 | 113560144 | rs2821143 | CNV_SNP |
| chr21 | 20195176  | 20195227  | rs2825168 | CNV_SNP |
| chr6  | 118629839 | 118629890 | rs283044  | CNV_SNP |

|       |           |           |           |         |
|-------|-----------|-----------|-----------|---------|
| chr21 | 31384271  | 31384322  | rs2832533 | CNV_SNP |
| chr21 | 37557448  | 37557499  | rs2835302 | CNV_SNP |
| chr18 | 10451669  | 10451720  | rs2847348 | CNV_SNP |
| chr8  | 97963785  | 97963836  | rs2853252 | CNV_SNP |
| chr4  | 187367513 | 187367564 | rs2889190 | CNV_SNP |
| chr7  | 64721520  | 64721571  | rs2900628 | CNV_SNP |
| chr7  | 81076806  | 81076857  | rs2906231 | CNV_SNP |
| chr12 | 3001318   | 3001369   | rs2907603 | CNV_SNP |
| chr17 | 11396351  | 11396402  | rs2908977 | CNV_SNP |
| chr7  | 2640352   | 2640403   | rs2917728 | CNV_SNP |
| chr18 | 19020924  | 19020975  | rs2917783 | CNV_SNP |
| chr18 | 9924591   | 9924642   | rs29193   | CNV_SNP |
| chr1  | 202188615 | 202188666 | rs2924105 | CNV_SNP |
| chr1  | 113234430 | 113234481 | rs2932532 | CNV_SNP |
| chr5  | 14869889  | 14869940  | rs2934813 | CNV_SNP |
| chr8  | 111298517 | 111298568 | rs2948998 | CNV_SNP |
| chr15 | 74566999  | 74567050  | rs2959019 | CNV_SNP |
| chr5  | 173763330 | 173763381 | rs2964101 | CNV_SNP |
| chr5  | 5492692   | 5492743   | rs2964131 | CNV_SNP |
| chr8  | 6710331   | 6710382   | rs2977794 | CNV_SNP |
| chr5  | 172573741 | 172573792 | rs29798   | CNV_SNP |
| chr1  | 59564347  | 59564398  | rs2989871 | CNV_SNP |
| chr14 | 51605975  | 51606026  | rs2999357 | CNV_SNP |
| chr2  | 17986657  | 17986708  | rs300152  | CNV_SNP |
| chr16 | 27356641  | 27356692  | rs3024560 | CNV_SNP |
| chr1  | 99589398  | 99589449  | rs303387  | CNV_SNP |
| chr7  | 154799067 | 154799118 | rs306288  | CNV_SNP |
| chr16 | 55329575  | 55329626  | rs31042   | CNV_SNP |
| chr6  | 29230657  | 29230708  | rs3130827 | CNV_SNP |
| chr1  | 83024666  | 83024717  | rs318416  | CNV_SNP |
| chr17 | 31030690  | 31030741  | rs321176  | CNV_SNP |
| chr7  | 80802084  | 80802135  | rs327677  | CNV_SNP |
| chr5  | 133908352 | 133908403 | rs329321  | CNV_SNP |
| chr3  | 159601737 | 159601788 | rs33053   | CNV_SNP |
| chr5  | 68390258  | 68390309  | rs337259  | CNV_SNP |
| chr1  | 226064719 | 226064770 | rs360093  | CNV_SNP |
| chr8  | 53901260  | 53901311  | rs360956  | CNV_SNP |
| chr7  | 103275777 | 103275828 | rs362646  | CNV_SNP |
| chr7  | 103214914 | 103214965 | rs362813  | CNV_SNP |
| chr15 | 62266224  | 62266275  | rs3743294 | CNV_SNP |
| chr4  | 25133643  | 25133694  | rs3756208 | CNV_SNP |
| chr2  | 173914749 | 173914800 | rs3769210 | CNV_SNP |
| chr2  | 216826580 | 216826631 | rs3770530 | CNV_SNP |
| chr7  | 2166488   | 2166539   | rs3778984 | CNV_SNP |
| chr12 | 68617193  | 68617244  | rs3782553 | CNV_SNP |
| chr14 | 61799745  | 61799796  | rs3783816 | CNV_SNP |
| chr15 | 88610431  | 88610482  | rs3784429 | CNV_SNP |
| chr15 | 48633066  | 48633117  | rs3784621 | CNV_SNP |
| chr1  | 66042052  | 66042103  | rs3790428 | CNV_SNP |
| chr6  | 41460261  | 41460312  | rs3800282 | CNV_SNP |
| chr1  | 120199163 | 120199214 | rs380155  | CNV_SNP |
| chr8  | 12586235  | 12586286  | rs3802268 | CNV_SNP |
| chr13 | 111119051 | 111119102 | rs3803234 | CNV_SNP |
| chr7  | 123382264 | 123382315 | rs3807634 | CNV_SNP |
| chrX  | 71788844  | 71788895  | rs3817725 | CNV_SNP |
| chr6  | 25092513  | 25092564  | rs3818270 | CNV_SNP |
| chr14 | 73128957  | 73129008  | rs3854    | CNV_SNP |
| chr6  | 153412450 | 153412501 | rs3910736 | CNV_SNP |
| chr10 | 49842629  | 49842680  | rs3910910 | CNV_SNP |
| chr3  | 180017398 | 180017449 | rs3914871 | CNV_SNP |
| chrX  | 25648131  | 25648182  | rs3922856 | CNV_SNP |
| chr4  | 183806878 | 183806929 | rs3924787 | CNV_SNP |
| chr19 | 28780436  | 28780487  | rs3960412 | CNV_SNP |
| chr6  | 5106873   | 5106924   | rs402541  | CNV_SNP |
| chr16 | 8382854   | 8382905   | rs40644   | CNV_SNP |
| chr6  | 136294957 | 136295008 | rs4072488 | CNV_SNP |
| chr7  | 32894477  | 32894528  | rs4101647 | CNV_SNP |
| chr5  | 75927162  | 75927213  | rs410262  | CNV_SNP |
| chr21 | 37954696  | 37954747  | rs412510  | CNV_SNP |
| chr4  | 105409628 | 105409679 | rs4129288 | CNV_SNP |
| chr13 | 109078673 | 109078724 | rs4144092 | CNV_SNP |
| chr8  | 128343853 | 128343904 | rs420101  | CNV_SNP |
| chr7  | 19616411  | 19616462  | rs4236296 | CNV_SNP |
| chr7  | 107730723 | 107730774 | rs423686  | CNV_SNP |
| chr22 | 26790859  | 26790910  | rs4239922 | CNV_SNP |
| chr4  | 190262460 | 190262511 | rs4241875 | CNV_SNP |
| chr5  | 2979684   | 2979735   | rs4242095 | CNV_SNP |
| chr16 | 79980399  | 79980450  | rs4258627 | CNV_SNP |
| chr4  | 48356307  | 48356358  | rs429969  | CNV_SNP |
| chr21 | 43995897  | 43995948  | rs430807  | CNV_SNP |
| chr4  | 166310695 | 166310746 | rs4308333 | CNV_SNP |
| chr4  | 28204079  | 28204130  | rs4318636 | CNV_SNP |
| chr7  | 3372223   | 3372274   | rs4327753 | CNV_SNP |
| chr14 | 64619824  | 64619875  | rs4329843 | CNV_SNP |

|       |           |           |           |          |
|-------|-----------|-----------|-----------|----------|
| chr18 | 44240500  | 44240551  | rs435202  | CNV_SNPs |
| chr16 | 58529589  | 58529640  | rs4356470 | CNV_SNPs |
| chr10 | 117888412 | 117888463 | rs4370849 | CNV_SNPs |
| chr3  | 38547995  | 38548046  | rs4371464 | CNV_SNPs |
| chr15 | 71892189  | 71892240  | rs4398066 | CNV_SNPs |
| chr15 | 63995397  | 63995448  | rs4411464 | CNV_SNPs |
| chr10 | 121932807 | 121932858 | rs4427485 | CNV_SNPs |
| chr4  | 1402624   | 1402675   | rs4441710 | CNV_SNPs |
| chr13 | 102276743 | 102276794 | rs4451831 | CNV_SNPs |
| chr8  | 84050866  | 84050917  | rs4481591 | CNV_SNPs |
| chr5  | 77168064  | 77168115  | rs4490567 | CNV_SNPs |
| chr13 | 25694314  | 25694365  | rs4491357 | CNV_SNPs |
| chr11 | 21635256  | 21635307  | rs4495891 | CNV_SNPs |
| chr9  | 10094872  | 10094923  | rs450818  | CNV_SNPs |
| chr10 | 10136313  | 10136364  | rs4509669 | CNV_SNPs |
| chr9  | 75047035  | 75047086  | rs4526421 | CNV_SNPs |
| chr9  | 13731175  | 13731226  | rs4536526 | CNV_SNPs |
| chr4  | 176935608 | 176935659 | rs4536875 | CNV_SNPs |
| chr21 | 27340275  | 27340326  | rs454312  | CNV_SNPs |
| chr18 | 34882906  | 34882957  | rs4567809 | CNV_SNPs |
| chr17 | 77453337  | 77453388  | rs4572435 | CNV_SNPs |
| chr4  | 28746066  | 28746117  | rs4591585 | CNV_SNPs |
| chr3  | 32670331  | 32670382  | rs4608730 | CNV_SNPs |
| chr6  | 98417121  | 98417172  | rs4610575 | CNV_SNPs |
| chr17 | 114643    | 114694    | rs4617924 | CNV_SNPs |
| chr8  | 24533167  | 24533218  | rs4625043 | CNV_SNPs |
| chr16 | 26320113  | 26320164  | rs4643323 | CNV_SNPs |
| chr21 | 31252285  | 31252336  | rs464500  | CNV_SNPs |
| chr1  | 22587852  | 22587903  | rs4655036 | CNV_SNPs |
| chr1  | 170835736 | 170835787 | rs4656809 | CNV_SNPs |
| chr2  | 66352769  | 66352820  | rs4671714 | CNV_SNPs |
| chr2  | 58496250  | 58496301  | rs4672233 | CNV_SNPs |
| chr2  | 223361127 | 223361178 | rs4673024 | CNV_SNPs |
| chr2  | 203723963 | 203724014 | rs4673238 | CNV_SNPs |
| chr3  | 75139661  | 75139712  | rs4677451 | CNV_SNPs |
| chr3  | 33432281  | 33432332  | rs4678951 | CNV_SNPs |
| chr3  | 154880344 | 154880395 | rs4679739 | CNV_SNPs |
| chr5  | 58088324  | 58088375  | rs4700308 | CNV_SNPs |
| chr6  | 45556043  | 45556094  | rs4711819 | CNV_SNPs |
| chr6  | 17627564  | 17627615  | rs4716167 | CNV_SNPs |
| chr7  | 151430683 | 151430734 | rs4726088 | CNV_SNPs |
| chr7  | 135681492 | 135681543 | rs4732165 | CNV_SNPs |
| chr8  | 139766452 | 139766503 | rs4736186 | CNV_SNPs |
| chr8  | 70250381  | 70250432  | rs4737959 | CNV_SNPs |
| chr8  | 86485280  | 86485331  | rs4740054 | CNV_SNPs |
| chr9  | 3206132   | 3206183   | rs4741818 | CNV_SNPs |
| chr10 | 6176140   | 6176191   | rs4747886 | CNV_SNPs |
| chr10 | 133191802 | 133191853 | rs4751376 | CNV_SNPs |
| chr11 | 44368355  | 44368406  | rs4755815 | CNV_SNPs |
| chr11 | 39878796  | 39878847  | rs4756547 | CNV_SNPs |
| chr8  | 109235832 | 109235883 | rs475865  | CNV_SNPs |
| chr16 | 3498925   | 3498976   | rs4786416 | CNV_SNPs |
| chr17 | 72939420  | 72939471  | rs4789110 | CNV_SNPs |
| chr17 | 77280312  | 77280363  | rs4789882 | CNV_SNPs |
| chr17 | 31819572  | 31819623  | rs4795799 | CNV_SNPs |
| chr18 | 2548075   | 2548126   | rs4797070 | CNV_SNPs |
| chr19 | 33906097  | 33906148  | rs4805885 | CNV_SNPs |
| chr20 | 55178055  | 55178106  | rs4811719 | CNV_SNPs |
| chr22 | 41461810  | 41461861  | rs4821995 | CNV_SNPs |
| chrX  | 122696537 | 122696588 | rs4825872 | CNV_SNPs |
| chr3  | 48515053  | 48515104  | rs4858795 | CNV_SNPs |
| chr13 | 75909170  | 75909221  | rs485988  | CNV_SNPs |
| chr4  | 65763566  | 65763617  | rs4860174 | CNV_SNPs |
| chr16 | 78785537  | 78785588  | rs4888839 | CNV_SNPs |
| chr16 | 31011157  | 31011208  | rs4889606 | CNV_SNPs |
| chrX  | 3085438   | 3085489   | rs4892924 | CNV_SNPs |
| chr3  | 104282508 | 104282559 | rs4895085 | CNV_SNPs |
| chr14 | 104146335 | 104146386 | rs4900589 | CNV_SNPs |
| chr14 | 52640538  | 52640589  | rs4901224 | CNV_SNPs |
| chr5  | 88365752  | 88365803  | rs4916667 | CNV_SNPs |
| chr11 | 110644506 | 110644557 | rs4937385 | CNV_SNPs |
| chr13 | 41032433  | 41032484  | rs4941979 | CNV_SNPs |
| chr11 | 76059203  | 76059254  | rs4945074 | CNV_SNPs |
| chr10 | 45386020  | 45386071  | rs4948924 | CNV_SNPs |
| chr1  | 30794934  | 30794985  | rs4949254 | CNV_SNPs |
| chr1  | 147282420 | 147282471 | rs4950346 | CNV_SNPs |
| chr2  | 44561506  | 44561557  | rs4953086 | CNV_SNPs |
| chr2  | 47257839  | 47257890  | rs4953445 | CNV_SNPs |
| chr5  | 151755990 | 151756041 | rs4958301 | CNV_SNPs |
| chr6  | 6269272   | 6269323   | rs4960181 | CNV_SNPs |
| chr8  | 141840855 | 141840906 | rs4961234 | CNV_SNPs |
| chr9  | 16206734  | 16206785  | rs4961670 | CNV_SNPs |
| chr10 | 127191096 | 127191147 | rs4962305 | CNV_SNPs |
| chr12 | 27330490  | 27330541  | rs4964049 | CNV_SNPs |

|       |           |           |           |         |
|-------|-----------|-----------|-----------|---------|
| chr15 | 99226122  | 99226173  | rs4966012 | CNV_SNP |
| chr5  | 134389663 | 134389714 | rs4976264 | CNV_SNP |
| chr9  | 113137374 | 113137425 | rs4978425 | CNV_SNP |
| chr8  | 56063780  | 56063831  | rs5008177 | CNV_SNP |
| chr16 | 7032428   | 7032479   | rs5015420 | CNV_SNP |
| chr9  | 3253587   | 3253638   | rs527697  | CNV_SNP |
| chr18 | 7023568   | 7023619   | rs529821  | CNV_SNP |
| chr11 | 83269165  | 83269216  | rs533209  | CNV_SNP |
| chr11 | 100850176 | 100850227 | rs533571  | CNV_SNP |
| chr1  | 185520574 | 185520625 | rs534817  | CNV_SNP |
| chr18 | 2224716   | 2224767   | rs564201  | CNV_SNP |
| chr1  | 190734025 | 190734076 | rs567695  | CNV_SNP |
| chr22 | 30937281  | 30937332  | rs5749122 | CNV_SNP |
| chr8  | 16704073  | 16704124  | rs576762  | CNV_SNP |
| chr6  | 163528922 | 163528973 | rs578974  | CNV_SNP |
| chr6  | 163517009 | 163517060 | rs579172  | CNV_SNP |
| chr11 | 30098624  | 30098675  | rs588231  | CNV_SNP |
| chrX  | 140519341 | 140519392 | rs5907921 | CNV_SNP |
| chrX  | 145042078 | 145042129 | rs5919974 | CNV_SNP |
| chrX  | 22516314  | 22516365  | rs5925700 | CNV_SNP |
| chrX  | 125318915 | 125318966 | rs5933384 | CNV_SNP |
| chrX  | 13078749  | 13078800  | rs5935490 | CNV_SNP |
| chrX  | 69254734  | 69254785  | rs5936531 | CNV_SNP |
| chr1  | 182696091 | 182696142 | rs595289  | CNV_SNP |
| chr11 | 30254524  | 30254575  | rs595496  | CNV_SNP |
| chrX  | 8703385   | 8703436   | rs5978265 | CNV_SNP |
| chrX  | 26693479  | 26693530  | rs5986635 | CNV_SNP |
| chr22 | 33828970  | 33829021  | rs5998941 | CNV_SNP |
| chr22 | 45714911  | 45714962  | rs6006984 | CNV_SNP |
| chr20 | 58196398  | 58196449  | rs6015534 | CNV_SNP |
| chr12 | 52921253  | 52921304  | rs602017  | CNV_SNP |
| chr20 | 345838    | 345889    | rs6051490 | CNV_SNP |
| chr20 | 7600987   | 7601038   | rs6055187 | CNV_SNP |
| chr20 | 60426087  | 60426138  | rs6061867 | CNV_SNP |
| chr20 | 41956894  | 41956945  | rs6073049 | CNV_SNP |
| chr20 | 1421906   | 1421957   | rs6079138 | CNV_SNP |
| chr20 | 16142307  | 16142358  | rs6080154 | CNV_SNP |
| chr20 | 6952545   | 6952596   | rs6085786 | CNV_SNP |
| chr20 | 48451103  | 48451154  | rs6095681 | CNV_SNP |
| chr20 | 58054422  | 58054473  | rs6100460 | CNV_SNP |
| chr1  | 234802241 | 234802292 | rs610329  | CNV_SNP |
| chr20 | 2135879   | 2135930   | rs6113024 | CNV_SNP |
| chr8  | 36092395  | 36092446  | rs611313  | CNV_SNP |
| chr20 | 39924604  | 39924655  | rs6129804 | CNV_SNP |
| chr20 | 15770357  | 15770408  | rs6135517 | CNV_SNP |
| chr20 | 19414921  | 19414972  | rs6136727 | CNV_SNP |
| chr1  | 117273508 | 117273559 | rs614516  | CNV_SNP |
| chr12 | 50412885  | 50412936  | rs615382  | CNV_SNP |
| chr13 | 103337331 | 103337382 | rs630706  | CNV_SNP |
| chr18 | 66080177  | 66080228  | rs636909  | CNV_SNP |
| chr20 | 19506703  | 19506754  | rs642189  | CNV_SNP |
| chr1  | 4955836   | 4955887   | rs6426446 | CNV_SNP |
| chr2  | 241362974 | 241363025 | rs6437337 | CNV_SNP |
| chr3  | 95454442  | 95454493  | rs6438074 | CNV_SNP |
| chr3  | 123714956 | 123715007 | rs6438822 | CNV_SNP |
| chr4  | 46047380  | 46047431  | rs6447494 | CNV_SNP |
| chr11 | 128571231 | 128571282 | rs644818  | CNV_SNP |
| chr5  | 34605299  | 34605350  | rs6451151 | CNV_SNP |
| chr6  | 68164932  | 68164983  | rs6455233 | CNV_SNP |
| chr7  | 12252715  | 12252766  | rs6460897 | CNV_SNP |
| chr7  | 16584444  | 16584495  | rs6461264 | CNV_SNP |
| chr7  | 4798507   | 4798558   | rs6463033 | CNV_SNP |
| chr7  | 46780588  | 46780639  | rs6463347 | CNV_SNP |
| chr8  | 121520030 | 121520081 | rs6469932 | CNV_SNP |
| chr9  | 20781953  | 20782004  | rs6475473 | CNV_SNP |
| chr11 | 13127867  | 13127918  | rs6486088 | CNV_SNP |
| chr13 | 99178250  | 99178301  | rs6491430 | CNV_SNP |
| chr15 | 39564267  | 39564318  | rs6492866 | CNV_SNP |
| chr2  | 67673904  | 67673955  | rs650129  | CNV_SNP |
| chr17 | 31889928  | 31889979  | rs6505356 | CNV_SNP |
| chrX  | 106444183 | 106444234 | rs6523931 | CNV_SNP |
| chr4  | 134134283 | 134134334 | rs6534936 | CNV_SNP |
| chrX  | 147332654 | 147332705 | rs6540406 | CNV_SNP |
| chr2  | 86184460  | 86184511  | rs6547651 | CNV_SNP |
| chr10 | 2158541   | 2158592   | rs6560798 | CNV_SNP |
| chr13 | 34299207  | 34299258  | rs6562039 | CNV_SNP |
| chr18 | 59254112  | 59254163  | rs6567221 | CNV_SNP |
| chr14 | 57255575  | 57255626  | rs6573105 | CNV_SNP |
| chr14 | 57732997  | 57733048  | rs6573142 | CNV_SNP |
| chr14 | 80952082  | 80952133  | rs6574581 | CNV_SNP |
| chr14 | 20893193  | 20893244  | rs6575809 | CNV_SNP |
| chr10 | 103249010 | 103249061 | rs6584424 | CNV_SNP |
| chr21 | 43174410  | 43174461  | rs6586235 | CNV_SNP |
| chr11 | 86333408  | 86333459  | rs6592302 | CNV_SNP |

|       |           |           |           |          |
|-------|-----------|-----------|-----------|----------|
| chr16 | 115046    | 115097    | rs6600227 | CNV_SNPs |
| chrX  | 149924712 | 149924763 | rs6627327 | CNV_SNPs |
| chrX  | 451116    | 451167    | rs6645103 | CNV_SNPs |
| chrY  | 401116    | 401167    | rs6645103 | CNV_SNPs |
| chr1  | 108079919 | 108079970 | rs666003  | CNV_SNPs |
| chr1  | 36411711  | 36411762  | rs6665591 | CNV_SNPs |
| chr1  | 116333708 | 116333759 | rs6669078 | CNV_SNPs |
| chr1  | 71762177  | 71762228  | rs6695355 | CNV_SNPs |
| chr1  | 53811916  | 53811967  | rs6698595 | CNV_SNPs |
| chr2  | 20616399  | 20616450  | rs6710671 | CNV_SNPs |
| chr2  | 99373694  | 99373745  | rs6712597 | CNV_SNPs |
| chr2  | 133919401 | 133919452 | rs6716343 | CNV_SNPs |
| chr2  | 222085587 | 222085638 | rs6719473 | CNV_SNPs |
| chr2  | 108623296 | 108623347 | rs6720783 | CNV_SNPs |
| chr2  | 125424586 | 125424637 | rs6750530 | CNV_SNPs |
| chr2  | 5429234   | 5429285   | rs6759683 | CNV_SNPs |
| chr3  | 63597356  | 63597407  | rs6774940 | CNV_SNPs |
| chr3  | 23146656  | 23146707  | rs6783710 | CNV_SNPs |
| chr3  | 55235599  | 55235650  | rs6785046 | CNV_SNPs |
| chr3  | 174257048 | 174257099 | rs6800681 | CNV_SNPs |
| chr3  | 116506445 | 116506496 | rs6806089 | CNV_SNPs |
| chr3  | 75164833  | 75164884  | rs6806344 | CNV_SNPs |
| chr6  | 65096771  | 65096822  | rs681665  | CNV_SNPs |
| chr4  | 145225972 | 145226023 | rs6821055 | CNV_SNPs |
| chr4  | 114757188 | 114757239 | rs6823304 | CNV_SNPs |
| chr4  | 41333435  | 41333486  | rs6830887 | CNV_SNPs |
| chr4  | 78271594  | 78271645  | rs6831412 | CNV_SNPs |
| chr4  | 94653668  | 94653719  | rs6837139 | CNV_SNPs |
| chr4  | 142367714 | 142367765 | rs6837853 | CNV_SNPs |
| chr4  | 190093220 | 190093271 | rs6848521 | CNV_SNPs |
| chr4  | 24030735  | 24030786  | rs6858568 | CNV_SNPs |
| chr5  | 111983015 | 111983066 | rs6860330 | CNV_SNPs |
| chr5  | 96383726  | 96383777  | rs6861399 | CNV_SNPs |
| chr5  | 127196040 | 127196091 | rs6864687 | CNV_SNPs |
| chr5  | 30031889  | 30031940  | rs6885929 | CNV_SNPs |
| chr5  | 116415218 | 116415269 | rs6889147 | CNV_SNPs |
| chr3  | 16403740  | 16403791  | rs690343  | CNV_SNPs |
| chr6  | 166653937 | 166653988 | rs6909545 | CNV_SNPs |
| chr6  | 137723518 | 137723569 | rs6912317 | CNV_SNPs |
| chr6  | 148266727 | 148266778 | rs6919109 | CNV_SNPs |
| chr6  | 121788705 | 121788756 | rs6919748 | CNV_SNPs |
| chr6  | 164341194 | 164341245 | rs6921880 | CNV_SNPs |
| chr6  | 3797831   | 3797882   | rs6925590 | CNV_SNPs |
| chr6  | 106051712 | 106051763 | rs6933379 | CNV_SNPs |
| chr7  | 37220906  | 37220957  | rs6946785 | CNV_SNPs |
| chr7  | 78867384  | 78867435  | rs6947782 | CNV_SNPs |
| chr7  | 47802482  | 47802533  | rs6953684 | CNV_SNPs |
| chr7  | 53722854  | 53722905  | rs6964140 | CNV_SNPs |
| chr8  | 102984253 | 102984304 | rs6982161 | CNV_SNPs |
| chr8  | 18916964  | 18917015  | rs6982849 | CNV_SNPs |
| chr8  | 65193111  | 65193162  | rs6982872 | CNV_SNPs |
| chr8  | 38736063  | 38736114  | rs6984966 | CNV_SNPs |
| chr8  | 142098951 | 142099002 | rs6990155 | CNV_SNPs |
| chr12 | 63294833  | 63294884  | rs699576  | CNV_SNPs |
| chr8  | 31397722  | 31397773  | rs7006706 | CNV_SNPs |
| chr7  | 83542147  | 83542198  | rs701286  | CNV_SNPs |
| chr8  | 131098136 | 131098187 | rs7015970 | CNV_SNPs |
| chr8  | 2387950   | 2388001   | rs7017910 | CNV_SNPs |
| chr9  | 100968572 | 100968623 | rs7029585 | CNV_SNPs |
| chr9  | 116791135 | 116791186 | rs7030167 | CNV_SNPs |
| chr9  | 102136151 | 102136202 | rs7030379 | CNV_SNPs |
| chr9  | 79231313  | 79231364  | rs7031280 | CNV_SNPs |
| chr9  | 5754962   | 5755013   | rs7038447 | CNV_SNPs |
| chrX  | 115503892 | 115503943 | rs7057233 | CNV_SNPs |
| chr10 | 3280638   | 3280689   | rs7071984 | CNV_SNPs |
| chr10 | 16762497  | 16762548  | rs7084555 | CNV_SNPs |
| chr10 | 88866103  | 88866154  | rs7087038 | CNV_SNPs |
| chr10 | 8596750   | 8596801   | rs7093997 | CNV_SNPs |
| chr10 | 134199041 | 134199092 | rs7095623 | CNV_SNPs |
| chr10 | 16154496  | 16154547  | rs7097856 | CNV_SNPs |
| chr11 | 47286264  | 47286315  | rs7120118 | CNV_SNPs |
| chr11 | 133495530 | 133495581 | rs7127862 | CNV_SNPs |
| chr1  | 99780258  | 99780309  | rs712878  | CNV_SNPs |
| chr11 | 126528471 | 126528522 | rs7129619 | CNV_SNPs |
| chr12 | 66943149  | 66943200  | rs7134781 | CNV_SNPs |
| chr22 | 22535111  | 22535162  | rs713644  | CNV_SNPs |
| chr14 | 25438224  | 25438275  | rs7141943 | CNV_SNPs |
| chr2  | 212698692 | 212698743 | rs714393  | CNV_SNPs |
| chr14 | 33107146  | 33107197  | rs7152377 | CNV_SNPs |
| chr13 | 32507400  | 32507451  | rs715332  | CNV_SNPs |
| chr15 | 95085048  | 95085099  | rs7161761 | CNV_SNPs |
| chr13 | 75629001  | 75629052  | rs716655  | CNV_SNPs |
| chr15 | 59502471  | 59502522  | rs7173371 | CNV_SNPs |
| chr16 | 61579557  | 61579608  | rs7184753 | CNV_SNPs |

|       |           |           |           |         |
|-------|-----------|-----------|-----------|---------|
| chr7  | 11691270  | 11691321  | rs719914  | CNV_SNP |
| chr16 | 85880399  | 85880450  | rs7205084 | CNV_SNP |
| chr21 | 41326551  | 41326602  | rs720566  | CNV_SNP |
| chr17 | 21809368  | 21809419  | rs7215861 | CNV_SNP |
| chr12 | 27578886  | 27578937  | rs722135  | CNV_SNP |
| chr18 | 54917206  | 54917257  | rs7231097 | CNV_SNP |
| chr18 | 51274810  | 51274861  | rs7241627 | CNV_SNP |
| chr19 | 56752015  | 56752066  | rs7247429 | CNV_SNP |
| chr19 | 39538566  | 39538617  | rs7250431 | CNV_SNP |
| chr19 | 51231373  | 51231424  | rs7252682 | CNV_SNP |
| chr10 | 95374443  | 95374494  | rs725888  | CNV_SNP |
| chr19 | 13519277  | 13519328  | rs7260408 | CNV_SNP |
| chr20 | 19602016  | 19602067  | rs728173  | CNV_SNP |
| chr12 | 17903318  | 17903369  | rs7297243 | CNV_SNP |
| chr12 | 16394822  | 16394873  | rs7298878 | CNV_SNP |
| chr12 | 28073146  | 28073197  | rs7309492 | CNV_SNP |
| chr12 | 108602944 | 108602995 | rs7313402 | CNV_SNP |
| chr12 | 131945103 | 131945154 | rs7314445 | CNV_SNP |
| chr21 | 42462162  | 42462213  | rs733428  | CNV_SNP |
| chr8  | 91433891  | 91433942  | rs734545  | CNV_SNP |
| chr1  | 180810207 | 180810258 | rs7349119 | CNV_SNP |
| chr2  | 110053183 | 110053234 | rs7370446 | CNV_SNP |
| chr22 | 27561474  | 27561525  | rs738156  | CNV_SNP |
| chr6  | 169644006 | 169644057 | rs7382429 | CNV_SNP |
| chr22 | 49026427  | 49026478  | rs738686  | CNV_SNP |
| chr6  | 25606652  | 25606703  | rs742131  | CNV_SNP |
| chr10 | 105517136 | 105517187 | rs743241  | CNV_SNP |
| chr4  | 21650342  | 21650393  | rs7437388 | CNV_SNP |
| chr2  | 72126394  | 72126445  | rs744027  | CNV_SNP |
| chr5  | 161253425 | 161253476 | rs7443990 | CNV_SNP |
| chr3  | 150742651 | 150742702 | rs744876  | CNV_SNP |
| chr5  | 178268106 | 178268157 | rs7448848 | CNV_SNP |
| chr11 | 66677340  | 66677391  | rs746018  | CNV_SNP |
| chr8  | 131907750 | 131907801 | rs7463591 | CNV_SNP |
| chr3  | 6422859   | 6422910   | rs746493  | CNV_SNP |
| chr2  | 4717063   | 4717114   | rs747888  | CNV_SNP |
| chr11 | 102020044 | 102020095 | rs7483889 | CNV_SNP |
| chr3  | 55487291  | 55487342  | rs751193  | CNV_SNP |
| chr1  | 219991315 | 219991366 | rs7525210 | CNV_SNP |
| chr10 | 86028553  | 86028604  | rs753795  | CNV_SNP |
| chr1  | 171393761 | 171393812 | rs7540116 | CNV_SNP |
| chr20 | 21177872  | 21177923  | rs754332  | CNV_SNP |
| chr1  | 189243465 | 189243516 | rs7545468 | CNV_SNP |
| chr1  | 165044012 | 165044063 | rs7554201 | CNV_SNP |
| chr9  | 136548773 | 136548824 | rs756691  | CNV_SNP |
| chr2  | 119592951 | 119593002 | rs7567463 | CNV_SNP |
| chr17 | 69889160  | 69889211  | rs757996  | CNV_SNP |
| chr2  | 135069446 | 135069497 | rs7587559 | CNV_SNP |
| chr2  | 54660516  | 54660567  | rs7597093 | CNV_SNP |
| chr2  | 169205256 | 169205307 | rs7597374 | CNV_SNP |
| chr2  | 170845387 | 170845438 | rs7597437 | CNV_SNP |
| chr2  | 106678580 | 106678631 | rs7598657 | CNV_SNP |
| chr2  | 41764879  | 41764930  | rs7604226 | CNV_SNP |
| chr2  | 38467232  | 38467283  | rs7608771 | CNV_SNP |
| chr3  | 177899327 | 177899378 | rs7620308 | CNV_SNP |
| chr3  | 106127688 | 106127739 | rs7620623 | CNV_SNP |
| chr3  | 23317516  | 23317567  | rs7630344 | CNV_SNP |
| chr17 | 8693617   | 8693668   | rs764605  | CNV_SNP |
| chr3  | 158104680 | 158104731 | rs7648196 | CNV_SNP |
| chr4  | 75662489  | 75662540  | rs7656912 | CNV_SNP |
| chr4  | 181797570 | 181797621 | rs7659727 | CNV_SNP |
| chr14 | 31375296  | 31375347  | rs766146  | CNV_SNP |
| chr18 | 72515813  | 72515864  | rs768759  | CNV_SNP |
| chr5  | 59018007  | 59018058  | rs7701748 | CNV_SNP |
| chr5  | 75111371  | 75111422  | rs7709242 | CNV_SNP |
| chr5  | 26678567  | 26678618  | rs7711007 | CNV_SNP |
| chr5  | 31061549  | 31061600  | rs7720376 | CNV_SNP |
| chr5  | 136191598 | 136191649 | rs7724913 | CNV_SNP |
| chr12 | 77814005  | 77814056  | rs772515  | CNV_SNP |
| chr5  | 31652739  | 31652790  | rs7727036 | CNV_SNP |
| chr5  | 36368228  | 36368279  | rs7728579 | CNV_SNP |
| chr5  | 21824669  | 21824720  | rs7730813 | CNV_SNP |
| chr6  | 125258111 | 125258162 | rs7762582 | CNV_SNP |
| chr1  | 106053777 | 106053828 | rs777107  | CNV_SNP |
| chr6  | 153023158 | 153023209 | rs7774405 | CNV_SNP |
| chr7  | 71297490  | 71297541  | rs7777622 | CNV_SNP |
| chr7  | 78021610  | 78021661  | rs7790008 | CNV_SNP |
| chr7  | 78319702  | 78319753  | rs7791589 | CNV_SNP |
| chr3  | 9040968   | 9041019   | rs780930  | CNV_SNP |
| chr8  | 121504093 | 121504144 | rs7814311 | CNV_SNP |
| chr17 | 3958315   | 3958366   | rs781845  | CNV_SNP |
| chr8  | 109735804 | 109735855 | rs7820557 | CNV_SNP |
| chr12 | 58814942  | 58814993  | rs782097  | CNV_SNP |
| chr8  | 104088093 | 104088144 | rs7833175 | CNV_SNP |

|       |           |           |           |         |
|-------|-----------|-----------|-----------|---------|
| chr8  | 30349888  | 30349939  | rs7840384 | CNV_SNP |
| chr9  | 75156031  | 75156082  | rs7857300 | CNV_SNP |
| chr9  | 75794663  | 75794714  | rs7875086 | CNV_SNP |
| chr18 | 38529945  | 38529996  | rs788433  | CNV_SNP |
| chr10 | 117807855 | 117807906 | rs7907882 | CNV_SNP |
| chr9  | 12518560  | 12518611  | rs791673  | CNV_SNP |
| chr10 | 53793390  | 53793441  | rs7918280 | CNV_SNP |
| chr11 | 105610179 | 105610230 | rs7928594 | CNV_SNP |
| chr11 | 81185305  | 81185356  | rs7937418 | CNV_SNP |
| chr11 | 130716131 | 130716182 | rs7943757 | CNV_SNP |
| chr11 | 42138488  | 42138539  | rs7949634 | CNV_SNP |
| chr12 | 122974227 | 122974278 | rs7955513 | CNV_SNP |
| chr12 | 109960936 | 109960987 | rs7956788 | CNV_SNP |
| chr12 | 40763947  | 40763998  | rs7968048 | CNV_SNP |
| chr13 | 29678894  | 29678945  | rs7981238 | CNV_SNP |
| chr13 | 55384620  | 55384671  | rs7990641 | CNV_SNP |
| chr13 | 42178306  | 42178357  | rs7995811 | CNV_SNP |
| chr13 | 87971310  | 87971361  | rs7999126 | CNV_SNP |
| chr13 | 90822886  | 90822937  | rs8002817 | CNV_SNP |
| chr14 | 36558051  | 36558102  | rs8008989 | CNV_SNP |
| chr14 | 80471850  | 80471901  | rs8015905 | CNV_SNP |
| chr14 | 105906047 | 105906098 | rs8021311 | CNV_SNP |
| chr15 | 55966616  | 55966667  | rs8025445 | CNV_SNP |
| chr3  | 59967647  | 59967698  | rs802774  | CNV_SNP |
| chr15 | 48073742  | 48073793  | rs8036299 | CNV_SNP |
| chr16 | 80160719  | 80160770  | rs8057500 | CNV_SNP |
| chr18 | 61199924  | 61199975  | rs8082959 | CNV_SNP |
| chr18 | 55179116  | 55179167  | rs8089950 | CNV_SNP |
| chr18 | 73601981  | 73602032  | rs8096468 | CNV_SNP |
| chr19 | 31706385  | 31706436  | rs8109968 | CNV_SNP |
| chr21 | 39625753  | 39625804  | rs8129186 | CNV_SNP |
| chr14 | 77427443  | 77427494  | rs8181996 | CNV_SNP |
| chr10 | 26580010  | 26580061  | rs8190780 | CNV_SNP |
| chr1  | 109490431 | 109490482 | rs839543  | CNV_SNP |
| chr1  | 7434518   | 7434569   | rs845215  | CNV_SNP |
| chr7  | 12463083  | 12463134  | rs847901  | CNV_SNP |
| chr14 | 46730873  | 46730924  | rs858891  | CNV_SNP |
| chr1  | 30535088  | 30535139  | rs869357  | CNV_SNP |
| chr19 | 31301860  | 31301911  | rs879835  | CNV_SNP |
| chr1  | 15295993  | 15296044  | rs880922  | CNV_SNP |
| chr11 | 12264114  | 12264165  | rs880963  | CNV_SNP |
| chr17 | 53367274  | 53367325  | rs884303  | CNV_SNP |
| chr5  | 153690447 | 153690498 | rs889029  | CNV_SNP |
| chr19 | 18758229  | 18758280  | rs889362  | CNV_SNP |
| chr6  | 119108337 | 119108388 | rs902780  | CNV_SNP |
| chr4  | 184234561 | 184234612 | rs907360  | CNV_SNP |
| chr20 | 52776815  | 52776866  | rs912505  | CNV_SNP |
| chr22 | 26388118  | 26388169  | rs916424  | CNV_SNP |
| chr13 | 32747096  | 32747147  | rs916732  | CNV_SNP |
| chr5  | 97303808  | 97303859  | rs918595  | CNV_SNP |
| chr2  | 43951896  | 43951947  | rs919694  | CNV_SNP |
| chr5  | 148140671 | 148140722 | rs919723  | CNV_SNP |
| chr15 | 77033908  | 77033959  | rs920712  | CNV_SNP |
| chr19 | 28788892  | 28788943  | rs921931  | CNV_SNP |
| chr6  | 31358917  | 31358968  | rs9266791 | CNV_SNP |
| chr3  | 98267263  | 98267314  | rs9289628 | CNV_SNP |
| chrX  | 125499310 | 125499361 | rs929019  | CNV_SNP |
| chr5  | 28498957  | 28499008  | rs9292261 | CNV_SNP |
| chr6  | 45769392  | 45769443  | rs9296469 | CNV_SNP |
| chr17 | 10379650  | 10379701  | rs9303259 | CNV_SNP |
| chr2  | 36353088  | 36353139  | rs931996  | CNV_SNP |
| chr6  | 100302383 | 100302434 | rs9321767 | CNV_SNP |
| chr6  | 155699594 | 155699645 | rs9322521 | CNV_SNP |
| chr11 | 123605911 | 123605962 | rs9326264 | CNV_SNP |
| chr6  | 82852518  | 82852569  | rs9341911 | CNV_SNP |
| chr6  | 167630413 | 167630464 | rs9348239 | CNV_SNP |
| chr6  | 19728977  | 19729028  | rs9356708 | CNV_SNP |
| chr6  | 170798865 | 170798916 | rs9366232 | CNV_SNP |
| chr6  | 139292657 | 139292708 | rs9376390 | CNV_SNP |
| chr6  | 97729927  | 97729978  | rs9387216 | CNV_SNP |
| chr6  | 119748233 | 119748284 | rs9401144 | CNV_SNP |
| chr9  | 82832743  | 82832794  | rs9410830 | CNV_SNP |
| chr6  | 79720841  | 79720892  | rs9443638 | CNV_SNP |
| chr6  | 158411619 | 158411670 | rs9459057 | CNV_SNP |
| chr20 | 41759515  | 41759566  | rs947206  | CNV_SNP |
| chr18 | 13910704  | 13910755  | rs948330  | CNV_SNP |
| chr3  | 16770070  | 16770121  | rs951491  | CNV_SNP |
| chr13 | 96897230  | 96897281  | rs9525166 | CNV_SNP |
| chr8  | 81288899  | 81288950  | rs952557  | CNV_SNP |
| chr13 | 46408011  | 46408062  | rs9526114 | CNV_SNP |
| chr13 | 80561410  | 80561461  | rs9531007 | CNV_SNP |
| chr8  | 66631946  | 66631997  | rs953593  | CNV_SNP |
| chr13 | 34348506  | 34348557  | rs9538560 | CNV_SNP |
| chr13 | 21004712  | 21004763  | rs953958  | CNV_SNP |

|       |           |           |           |         |
|-------|-----------|-----------|-----------|---------|
| chr2  | 189541662 | 189541713 | rs955813  | CNV_SNP |
| chr13 | 76833658  | 76833709  | rs9573824 | CNV_SNP |
| chr13 | 92901888  | 92901939  | rs9584005 | CNV_SNP |
| chr6  | 116470535 | 116470586 | rs958738  | CNV_SNP |
| chr12 | 92820726  | 92820777  | rs959897  | CNV_SNP |
| chr4  | 12321643  | 12321694  | rs961996  | CNV_SNP |
| chr22 | 49370808  | 49370859  | rs9628100 | CNV_SNP |
| chr16 | 89250856  | 89250907  | rs9635539 | CNV_SNP |
| chr7  | 78924663  | 78924714  | rs9648980 | CNV_SNP |
| chr2  | 178848461 | 178848512 | rs966433  | CNV_SNP |
| chrX  | 86830819  | 86830870  | rs968971  | CNV_SNP |
| chr2  | 49394679  | 49394730  | rs969230  | CNV_SNP |
| chr11 | 8589622   | 8589673   | rs9736791 | CNV_SNP |
| chr3  | 112353212 | 112353263 | rs981181  | CNV_SNP |
| chr3  | 41443241  | 41443292  | rs9824480 | CNV_SNP |
| chr3  | 28650212  | 28650263  | rs9839541 | CNV_SNP |
| chr3  | 28746004  | 28746055  | rs9840640 | CNV_SNP |
| chr3  | 162769352 | 162769403 | rs9841791 | CNV_SNP |
| chr3  | 164564553 | 164564604 | rs9842109 | CNV_SNP |
| chr3  | 59789150  | 59789201  | rs9846213 | CNV_SNP |
| chr3  | 25408425  | 25408476  | rs9853460 | CNV_SNP |
| chr3  | 134069635 | 134069686 | rs9853621 | CNV_SNP |
| chr3  | 75010962  | 75011013  | rs9857154 | CNV_SNP |
| chr3  | 155848926 | 155848977 | rs9862153 | CNV_SNP |
| chr3  | 190212680 | 190212731 | rs9864293 | CNV_SNP |
| chr17 | 55816806  | 55816857  | rs9906591 | CNV_SNP |
| chr16 | 79008542  | 79008593  | rs9927800 | CNV_SNP |
| chr16 | 1987032   | 1987083   | rs9928312 | CNV_SNP |
| chr15 | 54609441  | 54609492  | rs994244  | CNV_SNP |
| chr18 | 70571212  | 70571263  | rs9955288 | CNV_SNP |
| chrX  | 5699368   | 5699419   | rs996407  | CNV_SNP |
| chr4  | 67138117  | 67138168  | rs9968294 | CNV_SNP |
| chr4  | 175047613 | 175047664 | rs9992579 | CNV_SNP |
| chrY  | 2655004   | 2655669   | SRY       | CNV_SNP |
| chrY  | 9175093   | 9175647   | TSPY4     | CNV_SNP |
| chrY  | 9176204   | 9176332   | TSPY4     | CNV_SNP |
| chrY  | 9176410   | 9176572   | TSPY4     | CNV_SNP |
| chrY  | 9176623   | 9176819   | TSPY4     | CNV_SNP |
| chrY  | 9176864   | 9177007   | TSPY4     | CNV_SNP |
| chrY  | 9177651   | 9177724   | TSPY4     | CNV_SNP |
| chrY  | 9195426   | 9195713   | TSPY4     | CNV_SNP |
| chrY  | 9215705   | 9216240   | TSPY4     | CNV_SNP |
| chrY  | 9216797   | 9216925   | TSPY4     | CNV_SNP |
| chrY  | 9217003   | 9217165   | TSPY4     | CNV_SNP |
| chrY  | 9217216   | 9217412   | TSPY4     | CNV_SNP |
| chrY  | 9217468   | 9217600   | TSPY4     | CNV_SNP |
| chrY  | 9218244   | 9218317   | TSPY4     | CNV_SNP |
| chrY  | 9236050   | 9236586   | TSPY4     | CNV_SNP |
| chrY  | 9237143   | 9237271   | TSPY4     | CNV_SNP |
| chrY  | 9237349   | 9237511   | TSPY4     | CNV_SNP |
| chrY  | 9237562   | 9237758   | TSPY4     | CNV_SNP |
| chrY  | 9237814   | 9237946   | TSPY4     | CNV_SNP |
| chrY  | 9238590   | 9238663   | TSPY4     | CNV_SNP |
| chrY  | 9365728   | 9366045   | TSPY4     | CNV_SNP |
| chrY  | 9366602   | 9366730   | TSPY4     | CNV_SNP |
| chrY  | 9366808   | 9366970   | TSPY4     | CNV_SNP |
| chrY  | 9367021   | 9367217   | TSPY4     | CNV_SNP |
| chrY  | 9367273   | 9367405   | TSPY4     | CNV_SNP |
| chrY  | 9368049   | 9368122   | TSPY4     | CNV_SNP |
| chrY  | 14821355  | 14821501  | USP9Y     | CNV_SNP |
| chrY  | 14832496  | 14832695  | USP9Y     | CNV_SNP |
| chrY  | 14834015  | 14834145  | USP9Y     | CNV_SNP |
| chrY  | 14837020  | 14837183  | USP9Y     | CNV_SNP |
| chrY  | 14838482  | 14838751  | USP9Y     | CNV_SNP |
| chrY  | 14847520  | 14847686  | USP9Y     | CNV_SNP |
| chrY  | 14847906  | 14848208  | USP9Y     | CNV_SNP |
| chrY  | 14848319  | 14848508  | USP9Y     | CNV_SNP |
| chrY  | 14850065  | 14850268  | USP9Y     | CNV_SNP |
| chrY  | 14851433  | 14851588  | USP9Y     | CNV_SNP |
| chrY  | 14869096  | 14869353  | USP9Y     | CNV_SNP |
| chrY  | 14870410  | 14870597  | USP9Y     | CNV_SNP |
| chrY  | 14872388  | 14872572  | USP9Y     | CNV_SNP |
| chrY  | 14882976  | 14883114  | USP9Y     | CNV_SNP |
| chrY  | 14885491  | 14885884  | USP9Y     | CNV_SNP |
| chrY  | 14887379  | 14887525  | USP9Y     | CNV_SNP |
| chrY  | 14888557  | 14888819  | USP9Y     | CNV_SNP |
| chrY  | 14889927  | 14890218  | USP9Y     | CNV_SNP |
| chrY  | 14890514  | 14890714  | USP9Y     | CNV_SNP |
| chrY  | 14891434  | 14891605  | USP9Y     | CNV_SNP |
| chrY  | 14898111  | 14898292  | USP9Y     | CNV_SNP |
| chrY  | 14898429  | 14898758  | USP9Y     | CNV_SNP |
| chrY  | 14902314  | 14902490  | USP9Y     | CNV_SNP |
| chrY  | 14903406  | 14903582  | USP9Y     | CNV_SNP |
| chrY  | 14904939  | 14905159  | USP9Y     | CNV_SNP |

|       |           |           |        |              |
|-------|-----------|-----------|--------|--------------|
| chrY  | 14922088  | 14922247  | USP9Y  | CNV_SNPs     |
| chrY  | 14922581  | 14922778  | USP9Y  | CNV_SNPs     |
| chrY  | 14923544  | 14923741  | USP9Y  | CNV_SNPs     |
| chrY  | 14924739  | 14925012  | USP9Y  | CNV_SNPs     |
| chrY  | 14928033  | 14928304  | USP9Y  | CNV_SNPs     |
| chrY  | 14930329  | 14930570  | USP9Y  | CNV_SNPs     |
| chrY  | 14945588  | 14945812  | USP9Y  | CNV_SNPs     |
| chrY  | 14949811  | 14950003  | USP9Y  | CNV_SNPs     |
| chrY  | 14951764  | 14952565  | USP9Y  | CNV_SNPs     |
| chrY  | 14952910  | 14953084  | USP9Y  | CNV_SNPs     |
| chrY  | 14954140  | 14954416  | USP9Y  | CNV_SNPs     |
| chrY  | 14954963  | 14955143  | USP9Y  | CNV_SNPs     |
| chrY  | 14958232  | 14958468  | USP9Y  | CNV_SNPs     |
| chrY  | 14958832  | 14959103  | USP9Y  | CNV_SNPs     |
| chrY  | 14959138  | 14959277  | USP9Y  | CNV_SNPs     |
| chrY  | 14968239  | 14968446  | USP9Y  | CNV_SNPs     |
| chrY  | 14968532  | 14968795  | USP9Y  | CNV_SNPs     |
| chrY  | 14969465  | 14969611  | USP9Y  | CNV_SNPs     |
| chrY  | 14971178  | 14971366  | USP9Y  | CNV_SNPs     |
| chrY  | 2821952   | 2822063   | ZFY    | CNV_SNPs     |
| chrY  | 2829089   | 2829712   | ZFY    | CNV_SNPs     |
| chrY  | 2843110   | 2843310   | ZFY    | CNV_SNPs     |
| chrY  | 2843526   | 2843720   | ZFY    | CNV_SNPs     |
| chrY  | 2844685   | 2844888   | ZFY    | CNV_SNPs     |
| chrY  | 2845955   | 2846146   | ZFY    | CNV_SNPs     |
| chrY  | 2846825   | 2848059   | ZFY    | CNV_SNPs     |
| chr10 | 123258030 | 123258033 | FGFR2  | 281_hotspots |
| chr10 | 123274768 | 123274771 | FGFR2  | 281_hotspots |
| chr10 | 123279675 | 123279678 | FGFR2  | 281_hotspots |
| chr10 | 89692903  | 89692906  | PTEN   | 281_hotspots |
| chr10 | 89692921  | 89692924  | PTEN   | 281_hotspots |
| chr10 | 89717671  | 89717674  | PTEN   | 281_hotspots |
| chr10 | 96798738  | 96798741  | CYP2C8 | 281_hotspots |
| chr11 | 108117797 | 108117800 | ATM    | 281_hotspots |
| chr11 | 108218043 | 108218046 | ATM    | 281_hotspots |
| chr11 | 533872    | 533875    | HRAS   | 281_hotspots |
| chr11 | 534283    | 534286    | HRAS   | 281_hotspots |
| chr11 | 534286    | 534289    | HRAS   | 281_hotspots |
| chr11 | 69456210  | 69456213  | CCND1  | 281_hotspots |
| chr11 | 69466020  | 69466023  | CCND1  | 281_hotspots |
| chr11 | 71949085  | 71949088  | INPPL1 | 281_hotspots |
| chr12 | 112888197 | 112888200 | PTPN11 | 281_hotspots |
| chr12 | 112888209 | 112888212 | PTPN11 | 281_hotspots |
| chr12 | 112926886 | 112926889 | PTPN11 | 281_hotspots |
| chr12 | 112926907 | 112926910 | PTPN11 | 281_hotspots |
| chr12 | 133250286 | 133250289 | POLE   | 281_hotspots |
| chr12 | 133253182 | 133253185 | POLE   | 281_hotspots |
| chr12 | 25378559  | 25378562  | KRAS   | 281_hotspots |
| chr12 | 25378646  | 25378649  | KRAS   | 281_hotspots |
| chr12 | 25380274  | 25380277  | KRAS   | 281_hotspots |
| chr12 | 25380277  | 25380280  | KRAS   | 281_hotspots |
| chr12 | 25398279  | 25398282  | KRAS   | 281_hotspots |
| chr12 | 25398282  | 25398285  | KRAS   | 281_hotspots |
| chr12 | 46230639  | 46230642  | ARID2  | 281_hotspots |
| chr12 | 52385714  | 52385717  | ACVR1B | 281_hotspots |
| chr12 | 56477629  | 56477632  | ERBB3  | 281_hotspots |
| chr12 | 56478853  | 56478856  | ERBB3  | 281_hotspots |
| chr12 | 56482340  | 56482343  | ERBB3  | 281_hotspots |
| chr12 | 58145428  | 58145431  | CDK4   | 281_hotspots |
| chr12 | 58145434  | 58145437  | CDK4   | 281_hotspots |
| chr13 | 111372024 | 111372027 | ING1   | 281_hotspots |
| chr13 | 28592639  | 28592642  | FLT3   | 281_hotspots |
| chr13 | 73649904  | 73649907  | KLF5   | 281_hotspots |
| chr14 | 105246548 | 105246551 | AKT1   | 281_hotspots |
| chr14 | 38061460  | 38061463  | FOXA1  | 281_hotspots |
| chr14 | 65544745  | 65544748  | MAX    | 281_hotspots |
| chr14 | 65560512  | 65560515  | MAX    | 281_hotspots |
| chr14 | 95557627  | 95557630  | DICER1 | 281_hotspots |
| chr15 | 45003744  | 45003747  | B2M    | 281_hotspots |
| chr15 | 66727440  | 66727443  | MAP2K1 | 281_hotspots |
| chr15 | 66727452  | 66727455  | MAP2K1 | 281_hotspots |
| chr15 | 66729161  | 66729164  | MAP2K1 | 281_hotspots |
| chr15 | 90631836  | 90631839  | IDH2   | 281_hotspots |
| chr15 | 90631932  | 90631935  | IDH2   | 281_hotspots |
| chr16 | 3788615   | 3788618   | CREBBP | 281_hotspots |
| chr16 | 56782198  | 56782201  | NUP93  | 281_hotspots |
| chr16 | 56782201  | 56782204  | NUP93  | 281_hotspots |
| chr16 | 68772217  | 68772220  | CDH1   | 281_hotspots |
| chr17 | 37868206  | 37868209  | ERBB2  | 281_hotspots |
| chr17 | 37879656  | 37879659  | ERBB2  | 281_hotspots |
| chr17 | 37880218  | 37880221  | ERBB2  | 281_hotspots |
| chr17 | 37880260  | 37880263  | ERBB2  | 281_hotspots |
| chr17 | 37880999  | 37881002  | ERBB2  | 281_hotspots |
| chr17 | 37881331  | 37881334  | ERBB2  | 281_hotspots |

|       |           |           |         |              |
|-------|-----------|-----------|---------|--------------|
| chr17 | 38510601  | 38510604  | RARA    | 281_hotspots |
| chr17 | 40481574  | 40481577  | STAT3   | 281_hotspots |
| chr17 | 47696423  | 47696426  | SPOP    | 281_hotspots |
| chr17 | 47696429  | 47696432  | SPOP    | 281_hotspots |
| chr17 | 47696641  | 47696644  | SPOP    | 281_hotspots |
| chr17 | 47696686  | 47696689  | SPOP    | 281_hotspots |
| chr17 | 7576852   | 7576855   | TP53    | 281_hotspots |
| chr17 | 7577079   | 7577082   | TP53    | 281_hotspots |
| chr17 | 7577091   | 7577094   | TP53    | 281_hotspots |
| chr17 | 7577094   | 7577097   | TP53    | 281_hotspots |
| chr17 | 7577097   | 7577100   | TP53    | 281_hotspots |
| chr17 | 7577103   | 7577106   | TP53    | 281_hotspots |
| chr17 | 7577112   | 7577115   | TP53    | 281_hotspots |
| chr17 | 7577115   | 7577118   | TP53    | 281_hotspots |
| chr17 | 7577118   | 7577121   | TP53    | 281_hotspots |
| chr17 | 7577121   | 7577124   | TP53    | 281_hotspots |
| chr17 | 7577127   | 7577130   | TP53    | 281_hotspots |
| chr17 | 7577139   | 7577142   | TP53    | 281_hotspots |
| chr17 | 7577515   | 7577518   | TP53    | 281_hotspots |
| chr17 | 7577533   | 7577536   | TP53    | 281_hotspots |
| chr17 | 7577536   | 7577539   | TP53    | 281_hotspots |
| chr17 | 7577545   | 7577548   | TP53    | 281_hotspots |
| chr17 | 7577548   | 7577551   | TP53    | 281_hotspots |
| chr17 | 7577554   | 7577557   | TP53    | 281_hotspots |
| chr17 | 7577557   | 7577560   | TP53    | 281_hotspots |
| chr17 | 7577563   | 7577566   | TP53    | 281_hotspots |
| chr17 | 7577566   | 7577569   | TP53    | 281_hotspots |
| chr17 | 7577569   | 7577572   | TP53    | 281_hotspots |
| chr17 | 7577572   | 7577575   | TP53    | 281_hotspots |
| chr17 | 7577578   | 7577581   | TP53    | 281_hotspots |
| chr17 | 7577605   | 7577608   | TP53    | 281_hotspots |
| chr17 | 7578188   | 7578191   | TP53    | 281_hotspots |
| chr17 | 7578200   | 7578203   | TP53    | 281_hotspots |
| chr17 | 7578203   | 7578206   | TP53    | 281_hotspots |
| chr17 | 7578206   | 7578209   | TP53    | 281_hotspots |
| chr17 | 7578209   | 7578212   | TP53    | 281_hotspots |
| chr17 | 7578233   | 7578236   | TP53    | 281_hotspots |
| chr17 | 7578260   | 7578263   | TP53    | 281_hotspots |
| chr17 | 7578263   | 7578266   | TP53    | 281_hotspots |
| chr17 | 7578266   | 7578269   | TP53    | 281_hotspots |
| chr17 | 7578269   | 7578272   | TP53    | 281_hotspots |
| chr17 | 7578370   | 7578371   | TP53    | 281_hotspots |
| chr17 | 7578392   | 7578395   | TP53    | 281_hotspots |
| chr17 | 7578401   | 7578404   | TP53    | 281_hotspots |
| chr17 | 7578404   | 7578407   | TP53    | 281_hotspots |
| chr17 | 7578410   | 7578413   | TP53    | 281_hotspots |
| chr17 | 7578440   | 7578443   | TP53    | 281_hotspots |
| chr17 | 7578476   | 7578479   | TP53    | 281_hotspots |
| chr17 | 7578497   | 7578500   | TP53    | 281_hotspots |
| chr17 | 7578506   | 7578509   | TP53    | 281_hotspots |
| chr17 | 7578524   | 7578527   | TP53    | 281_hotspots |
| chr17 | 7578533   | 7578536   | TP53    | 281_hotspots |
| chr17 | 7578551   | 7578554   | TP53    | 281_hotspots |
| chr17 | 7579311   | 7579314   | TP53    | 281_hotspots |
| chr17 | 7579353   | 7579356   | TP53    | 281_hotspots |
| chr17 | 7579587   | 7579590   | TP53    | 281_hotspots |
| chr17 | 7796793   | 7796796   | CHD3    | 281_hotspots |
| chr18 | 45368209  | 45368212  | SMAD2   | 281_hotspots |
| chr18 | 48591887  | 48591890  | SMAD4   | 281_hotspots |
| chr18 | 48591917  | 48591920  | SMAD4   | 281_hotspots |
| chr18 | 48593404  | 48593407  | SMAD4   | 281_hotspots |
| chr18 | 48604786  | 48604789  | SMAD4   | 281_hotspots |
| chr19 | 11144112  | 11144115  | SMARCA4 | 281_hotspots |
| chr19 | 3118940   | 3118943   | GNA11   | 281_hotspots |
| chr19 | 4117548   | 4117551   | MAP2K2  | 281_hotspots |
| chr19 | 52715969  | 52715972  | PPP2R1A | 281_hotspots |
| chr19 | 52715981  | 52715984  | PPP2R1A | 281_hotspots |
| chr1  | 11169374  | 11169377  | MTOR    | 281_hotspots |
| chr1  | 11184571  | 11184574  | MTOR    | 281_hotspots |
| chr1  | 11217228  | 11217231  | MTOR    | 281_hotspots |
| chr1  | 115256527 | 115256530 | NRAS    | 281_hotspots |
| chr1  | 115258742 | 115258745 | NRAS    | 281_hotspots |
| chr1  | 115258745 | 115258748 | NRAS    | 281_hotspots |
| chr1  | 120612005 | 120612008 | NOTCH2  | 281_hotspots |
| chr1  | 158606544 | 158606547 | SPTA1   | 281_hotspots |
| chr1  | 209879199 | 209879202 | HSD11B1 | 281_hotspots |
| chr1  | 226252133 | 226252136 | H3F3A   | 281_hotspots |
| chr1  | 226252154 | 226252157 | H3F3A   | 281_hotspots |
| chr1  | 226567665 | 226567668 | PARP1   | 281_hotspots |
| chr1  | 27087502  | 27087505  | ARID1A  | 281_hotspots |
| chr1  | 27100206  | 27100208  | ARID1A  | 281_hotspots |
| chr1  | 27106353  | 27106356  | ARID1A  | 281_hotspots |
| chr1  | 47395873  | 47395876  | CYP4A11 | 281_hotspots |
| chr20 | 20033085  | 20033088  | CRNKL1  | 281_hotspots |

|       |           |           |        |              |
|-------|-----------|-----------|--------|--------------|
| chr20 | 39832809  | 39832812  | ZHX3   | 281_hotspots |
| chr20 | 57484419  | 57484422  | GNAS   | 281_hotspots |
| chr21 | 44514775  | 44514778  | U2AF1  | 281_hotspots |
| chr21 | 44524454  | 44524457  | U2AF1  | 281_hotspots |
| chr21 | 44524484  | 44524487  | U2AF1  | 281_hotspots |
| chr22 | 22127161  | 22127164  | MAPK1  | 281_hotspots |
| chr22 | 41565528  | 41565531  | EP300  | 281_hotspots |
| chr22 | 41566473  | 41566476  | EP300  | 281_hotspots |
| chr2  | 16082315  | 16082318  | MYCN   | 281_hotspots |
| chr2  | 178098798 | 178098801 | NFE2L2 | 281_hotspots |
| chr2  | 178098801 | 178098804 | NFE2L2 | 281_hotspots |
| chr2  | 178098804 | 178098807 | NFE2L2 | 281_hotspots |
| chr2  | 178098807 | 178098810 | NFE2L2 | 281_hotspots |
| chr2  | 178098942 | 178098945 | NFE2L2 | 281_hotspots |
| chr2  | 178098951 | 178098954 | NFE2L2 | 281_hotspots |
| chr2  | 178098954 | 178098957 | NFE2L2 | 281_hotspots |
| chr2  | 178098957 | 178098960 | NFE2L2 | 281_hotspots |
| chr2  | 178098966 | 178098969 | NFE2L2 | 281_hotspots |
| chr2  | 198265474 | 198265477 | SF3B1  | 281_hotspots |
| chr2  | 198266609 | 198266612 | SF3B1  | 281_hotspots |
| chr2  | 198266831 | 198266834 | SF3B1  | 281_hotspots |
| chr2  | 198267358 | 198267361 | SF3B1  | 281_hotspots |
| chr2  | 198267478 | 198267481 | SF3B1  | 281_hotspots |
| chr2  | 198267481 | 198267484 | SF3B1  | 281_hotspots |
| chr2  | 209113110 | 209113113 | IDH1   | 281_hotspots |
| chr2  | 25457240  | 25457243  | DNMT3A | 281_hotspots |
| chr2  | 29432662  | 29432665  | ALK    | 281_hotspots |
| chr2  | 29443694  | 29443697  | ALK    | 281_hotspots |
| chr2  | 39281775  | 39281778  | SOS1   | 281_hotspots |
| chr2  | 61719469  | 61719472  | XPO1   | 281_hotspots |
| chr2  | 70315178  | 70315181  | PCBP1  | 281_hotspots |
| chr3  | 10183762  | 10183765  | VHL    | 281_hotspots |
| chr3  | 10188319  | 10188320  | VHL    | 281_hotspots |
| chr3  | 12645697  | 12645700  | RAF1   | 281_hotspots |
| chr3  | 138374242 | 138374245 | PIK3CB | 281_hotspots |
| chr3  | 178916724 | 178916727 | PIK3CA | 281_hotspots |
| chr3  | 178916853 | 178916856 | PIK3CA | 281_hotspots |
| chr3  | 178916874 | 178916877 | PIK3CA | 281_hotspots |
| chr3  | 178916928 | 178916931 | PIK3CA | 281_hotspots |
| chr3  | 178916943 | 178916946 | PIK3CA | 281_hotspots |
| chr3  | 178916964 | 178916965 | PIK3CA | 281_hotspots |
| chr3  | 178921547 | 178921550 | PIK3CA | 281_hotspots |
| chr3  | 178921550 | 178921553 | PIK3CA | 281_hotspots |
| chr3  | 178922362 | 178922365 | PIK3CA | 281_hotspots |
| chr3  | 178927979 | 178927982 | PIK3CA | 281_hotspots |
| chr3  | 178928078 | 178928081 | PIK3CA | 281_hotspots |
| chr3  | 178936081 | 178936084 | PIK3CA | 281_hotspots |
| chr3  | 178936090 | 178936093 | PIK3CA | 281_hotspots |
| chr3  | 178936093 | 178936096 | PIK3CA | 281_hotspots |
| chr3  | 178938933 | 178938936 | PIK3CA | 281_hotspots |
| chr3  | 178952005 | 178952008 | PIK3CA | 281_hotspots |
| chr3  | 178952071 | 178952074 | PIK3CA | 281_hotspots |
| chr3  | 178952074 | 178952077 | PIK3CA | 281_hotspots |
| chr3  | 178952083 | 178952086 | PIK3CA | 281_hotspots |
| chr3  | 30732968  | 30732971  | TGFBR2 | 281_hotspots |
| chr3  | 41266096  | 41266099  | CTNNB1 | 281_hotspots |
| chr3  | 41266099  | 41266102  | CTNNB1 | 281_hotspots |
| chr3  | 41266102  | 41266105  | CTNNB1 | 281_hotspots |
| chr3  | 41266108  | 41266111  | CTNNB1 | 281_hotspots |
| chr3  | 41266111  | 41266114  | CTNNB1 | 281_hotspots |
| chr3  | 41266123  | 41266126  | CTNNB1 | 281_hotspots |
| chr3  | 41266135  | 41266138  | CTNNB1 | 281_hotspots |
| chr3  | 41268764  | 41268767  | CTNNB1 | 281_hotspots |
| chr3  | 41274908  | 41274911  | CTNNB1 | 281_hotspots |
| chr3  | 49412896  | 49412899  | RHOA   | 281_hotspots |
| chr3  | 49412902  | 49412905  | RHOA   | 281_hotspots |
| chr3  | 49413007  | 49413010  | RHOA   | 281_hotspots |
| chr4  | 153244182 | 153244185 | FBXW7  | 281_hotspots |
| chr4  | 153247286 | 153247289 | FBXW7  | 281_hotspots |
| chr4  | 153247364 | 153247367 | FBXW7  | 281_hotspots |
| chr4  | 153249382 | 153249385 | FBXW7  | 281_hotspots |
| chr4  | 153251904 | 153251907 | FBXW7  | 281_hotspots |
| chr4  | 1803563   | 1803566   | FGFR3  | 281_hotspots |
| chr4  | 1803566   | 1803569   | FGFR3  | 281_hotspots |
| chr4  | 1806103   | 1806106   | FGFR3  | 281_hotspots |
| chr4  | 55594220  | 55594223  | KIT    | 281_hotspots |
| chr5  | 112116591 | 112116594 | APC    | 281_hotspots |
| chr5  | 112128142 | 112128145 | APC    | 281_hotspots |
| chr5  | 112128190 | 112128193 | APC    | 281_hotspots |
| chr5  | 112162890 | 112162893 | APC    | 281_hotspots |
| chr5  | 112164615 | 112164618 | APC    | 281_hotspots |
| chr5  | 112173916 | 112173919 | APC    | 281_hotspots |
| chr5  | 112174093 | 112174096 | APC    | 281_hotspots |
| chr5  | 112174630 | 112174633 | APC    | 281_hotspots |

|      |           |           |        |              |
|------|-----------|-----------|--------|--------------|
| chr5 | 112175302 | 112175305 | APC    | 281_hotspots |
| chr5 | 112175422 | 112175425 | APC    | 281_hotspots |
| chr5 | 112175506 | 112175509 | APC    | 281_hotspots |
| chr5 | 112175512 | 112175515 | APC    | 281_hotspots |
| chr5 | 112175575 | 112175578 | APC    | 281_hotspots |
| chr5 | 112175638 | 112175641 | APC    | 281_hotspots |
| chr5 | 35876390  | 35876393  | IL7R   | 281_hotspots |
| chr5 | 67588950  | 67588953  | PIK3R1 | 281_hotspots |
| chr5 | 67589137  | 67589140  | PIK3R1 | 281_hotspots |
| chr5 | 67591096  | 67591099  | PIK3R1 | 281_hotspots |
| chr5 | 67591105  | 67591108  | PIK3R1 | 281_hotspots |
| chr5 | 67591150  | 67591152  | PIK3R1 | 281_hotspots |
| chr7 | 105177175 | 105177178 | RINT1  | 281_hotspots |
| chr7 | 116412042 | 116412043 | MET    | 281_hotspots |
| chr7 | 140453131 | 140453134 | BRAF   | 281_hotspots |
| chr7 | 140453134 | 140453137 | BRAF   | 281_hotspots |
| chr7 | 140453143 | 140453146 | BRAF   | 281_hotspots |
| chr7 | 140453146 | 140453149 | BRAF   | 281_hotspots |
| chr7 | 140453152 | 140453155 | BRAF   | 281_hotspots |
| chr7 | 140453986 | 140453987 | BRAF   | 281_hotspots |
| chr7 | 140481400 | 140481403 | BRAF   | 281_hotspots |
| chr7 | 140481409 | 140481412 | BRAF   | 281_hotspots |
| chr7 | 148508725 | 148508728 | EZH2   | 281_hotspots |
| chr7 | 151188047 | 151188050 | RHEB   | 281_hotspots |
| chr7 | 55211078  | 55211081  | EGFR   | 281_hotspots |
| chr7 | 55221820  | 55221823  | EGFR   | 281_hotspots |
| chr7 | 55233041  | 55233044  | EGFR   | 281_hotspots |
| chr7 | 55241706  | 55241709  | EGFR   | 281_hotspots |
| chr7 | 55259513  | 55259516  | EGFR   | 281_hotspots |
| chr7 | 55259522  | 55259525  | EGFR   | 281_hotspots |
| chr7 | 6426891   | 6426894   | RAC1   | 281_hotspots |
| chr7 | 6441972   | 6441975   | RAC1   | 281_hotspots |
| chr7 | 77885497  | 77885500  | MAGI2  | 281_hotspots |
| chr8 | 128750724 | 128750727 | MYC    | 281_hotspots |
| chr8 | 128750988 | 128750991 | MYC    | 281_hotspots |
| chr8 | 38272305  | 38272308  | FGFR1  | 281_hotspots |
| chr8 | 38274848  | 38274851  | FGFR1  | 281_hotspots |
| chr9 | 127911966 | 127911969 | PPP6C  | 281_hotspots |
| chr9 | 137328349 | 137328352 | RXRA   | 281_hotspots |
| chr9 | 16436466  | 16436469  | BNC2   | 281_hotspots |
| chr9 | 21970967  | 21970970  | CDKN2A | 281_hotspots |
| chr9 | 21971015  | 21971018  | CDKN2A | 281_hotspots |
| chr9 | 21971027  | 21971030  | CDKN2A | 281_hotspots |
| chr9 | 21971093  | 21971096  | CDKN2A | 281_hotspots |
| chr9 | 21971108  | 21971111  | CDKN2A | 281_hotspots |
| chr9 | 21971117  | 21971120  | CDKN2A | 281_hotspots |
| chr9 | 21971183  | 21971186  | CDKN2A | 281_hotspots |
| chr9 | 21971204  | 21971207  | CDKN2A | 281_hotspots |
| chr9 | 21974676  | 21974679  | CDKN2A | 281_hotspots |
| chr9 | 78848415  | 78848418  | PCSK5  | 281_hotspots |
| chr9 | 80537109  | 80537112  | GNAQ   | 281_hotspots |
| chrX | 44922801  | 44922804  | KDM6A  | 281_hotspots |
| chrX | 70349257  | 70349260  | MED12  | 281_hotspots |
